# Supplementary material for: Machine Learning-Based Analysis of Glioma Grades Reveals Co-Enrichment
Source: Cancers (Basel). 2022 Feb 17;14(4):1014. doi: 10.3390/cancers14041014 (PMC8870250; doi:10.3390/cancers14041014)
Supplement: Supplementary file 1 [file cancers-14-01014-s001.zip]

Archive with 9 entries (9 files):
- supplementaryMaterials.pdf
- Table.S1.xlsx
- Table.S2.xlsx
- Table.S3.xlsx
- Table.S4.xlsx
- Table.S5.xlsx
- Table.S6.xlsx
- Table.S7.xlsx
- Table.S8.xlsx
