# Supplementary material for: Machine Learning-Based Analysis of Glioma Grades Reveals Co-Enrichment
Source: Cancers (Basel). 2022 Feb 17;14(4):1014. doi: 10.3390/cancers14041014 (PMC8870250; doi:10.3390/cancers14041014)
Supplement: Supplementary file 1 [file cancers-14-01014-s001.zip › Table.S1.xlsx]

## Sheet: Sheet1
Method	Package	Authors	Functions
Surrogate variable analysis	sva	Leek et al., 2012	ComBat, num.sv, sva
Batch effect removal	limma	Smyth, 2005	removeBatchEffect
Student’s t-test	genefilter	Gentleman et al., 2021	colttests
Gaussian Mixtures modelling	mclust	Scrucca et al., 2016	Mclust
PCA visualization	ggbiplot	Vu, 2011
t-SNE	M3C	John et al., 2020	tsne
Linking CpG sites with associated genes	IlluminaHumanMethylation450kanno.ilmn12.hg19	Hansen, 2016
ssGSEA	GSVA	Hänzelmann et al., 2013	gsva
ML evaluation	RWeka	Hornik et al., 2008	SMO, IBk, Bagging, J48, JRip
Rule-based classifier	R.ROSETTA	Garbulowski et al., 2021	rosetta
Rule-based network	VisuNet	Smolinska et al., 2022	visunet
Total correlation values	infotheo	Meyer & Meyer, 2009	multiinformation
MCFS with a criticaAngle threshold	rmcfs	Draminski & Koronacki, 2018	mcfs
Survival analysis	survival	Therneau & Lumley, 2015
	survminer	Kassambara et al., 2021
