# Supplementary material for: Machine Learning-Based Analysis of Glioma Grades Reveals Co-Enrichment
Source: Cancers (Basel). 2022 Feb 17;14(4):1014. doi: 10.3390/cancers14041014 (PMC8870250; doi:10.3390/cancers14041014)
Supplement: Supplementary file 1 [file cancers-14-01014-s001.zip › Table.S2.xlsx]

## Sheet: Sheet 1
	GM	Class
TCGA-41-2571-01	1	GBM
TCGA-16-0846-01	1	GBM
TCGA-06-2559-01	1	GBM
TCGA-32-2634-01	1	GBM
TCGA-06-2562-01	1	GBM
TCGA-32-2632-01	1	GBM
TCGA-02-0047-01	1	GBM
TCGA-06-2557-01	1	GBM
TCGA-76-4925-01	1	GBM
TCGA-06-0878-01	1	GBM
TCGA-08-0386-01	1	GBM
TCGA-26-5132-01	1	GBM
TCGA-26-5134-01	1	GBM
TCGA-06-0158-01	1	GBM
TCGA-28-5204-01	1	GBM
TCGA-28-5213-01	1	GBM
TCGA-32-1980-01	1	GBM
TCGA-06-0644-01	1	GBM
TCGA-28-5207-01	1	GBM
TCGA-14-1825-01	1	GBM
TCGA-19-2620-01	1	GBM
TCGA-06-0187-01	1	GBM
TCGA-06-0743-01	1	GBM
TCGA-14-0787-01	1	GBM
TCGA-76-4926-01	1	GBM
TCGA-06-0219-01	1	GBM
TCGA-06-5413-01	1	GBM
TCGA-28-5220-01	1	GBM
TCGA-41-2572-01	1	GBM
TCGA-06-0744-01	1	GBM
TCGA-27-1831-01	1	GBM
TCGA-32-5222-01	1	GBM
TCGA-06-2567-01	1	GBM
TCGA-15-0742-01	1	GBM
TCGA-06-0184-01	1	GBM
TCGA-06-5859-01	1	GBM
TCGA-27-2523-01	1	GBM
TCGA-28-5218-01	1	GBM
TCGA-06-0141-01	1	GBM
TCGA-06-0190-01	1	GBM
TCGA-12-0821-01	1	GBM
TCGA-27-2528-01	1	GBM
TCGA-32-2615-01	1	GBM
TCGA-06-5414-01	1	GBM
TCGA-06-0646-01	1	GBM
TCGA-06-5415-01	1	GBM
TCGA-12-0619-01	1	GBM
TCGA-12-3652-01	1	GBM
TCGA-19-2629-01	1	GBM
TCGA-06-0745-01	1	GBM
TCGA-06-2565-01	1	GBM
TCGA-26-5133-01	1	GBM
TCGA-28-2499-01	1	GBM
TCGA-32-1970-01	1	GBM
TCGA-06-5856-01	1	GBM
TCGA-76-4927-01	1	GBM
TCGA-06-0156-01	1	GBM
TCGA-14-1829-01	1	GBM
TCGA-27-1830-01	1	GBM
TCGA-19-5960-01	1	GBM
TCGA-27-1834-01	1	GBM
TCGA-27-2524-01	1	GBM
TCGA-06-0130-01	1	GBM
TCGA-06-0174-01	1	GBM
TCGA-14-0789-01	1	GBM
TCGA-02-2485-01	1	GBM
TCGA-06-0686-01	1	GBM
TCGA-06-0747-01	1	GBM
TCGA-28-1753-01	1	GBM
TCGA-28-5208-01	1	GBM
TCGA-28-5216-01	1	GBM
TCGA-06-5411-01	1	GBM
TCGA-19-2624-01	1	GBM
TCGA-06-0749-01	1	GBM
TCGA-06-2564-01	1	GBM
TCGA-06-0132-01	1	GBM
TCGA-12-0618-01	1	GBM
TCGA-14-0781-01	1	GBM
TCGA-19-1787-01	1	GBM
TCGA-27-2519-01	1	GBM
TCGA-41-3915-01	1	GBM
TCGA-06-0211-01	1	GBM
TCGA-06-0238-01	1	GBM
TCGA-12-3650-01	1	GBM
TCGA-28-2514-01	1	GBM
TCGA-28-1747-01	1	GBM
TCGA-02-2483-01	1	GBM
TCGA-06-0138-01	1	GBM
TCGA-06-0750-01	1	GBM
TCGA-26-1442-01	2	GBM
TCGA-06-0139-01	1	GBM
TCGA-06-0178-01	1	GBM
TCGA-19-4065-01	1	GBM
TCGA-27-1837-01	1	GBM
TCGA-27-2521-01	1	GBM
TCGA-06-0129-01	1	GBM
TCGA-06-0882-01	1	GBM
TCGA-15-1444-01	1	GBM
TCGA-76-4928-01	1	GBM
TCGA-06-1804-01	1	GBM
TCGA-27-2526-01	1	GBM
TCGA-06-5412-01	1	GBM
TCGA-26-5136-01	1	GBM
TCGA-28-2509-01	1	GBM
TCGA-19-2625-01	1	GBM
TCGA-32-1982-01	1	GBM
TCGA-76-4929-01	1	GBM
TCGA-06-2558-01	1	GBM
TCGA-06-5418-01	1	GBM
TCGA-14-0871-01	1	GBM
TCGA-06-0649-01	1	GBM
TCGA-06-0210-01	1	GBM
TCGA-06-2563-01	1	GBM
TCGA-06-5410-01	1	GBM
TCGA-26-5135-01	1	GBM
TCGA-76-4931-01	1	GBM
TCGA-14-0817-01	1	GBM
TCGA-28-2513-01	1	GBM
TCGA-28-5209-01	1	GBM
TCGA-26-5139-01	1	GBM
TCGA-14-0790-01	1	GBM
TCGA-06-0125-01	1	GBM
TCGA-06-0157-01	1	GBM
TCGA-19-1390-01	1	GBM
TCGA-41-4097-01	1	GBM
TCGA-02-0055-01	1	GBM
TCGA-12-1597-01	1	GBM
TCGA-28-5215-01	1	GBM
TCGA-12-5295-01	1	GBM
TCGA-14-1034-01	1	GBM
TCGA-06-0168-01	1	GBM
TCGA-27-1832-01	1	GBM
TCGA-41-5651-01	1	GBM
TCGA-14-1823-01	1	GBM
TCGA-12-5299-01	1	GBM
TCGA-06-0645-01	1	GBM
TCGA-19-2619-01	1	GBM
TCGA-06-5408-01	1	GBM
TCGA-06-2561-01	1	GBM
TCGA-27-1835-01	1	GBM
TCGA-14-2554-01	1	GBM
TCGA-76-4932-01	1	GBM
TCGA-16-1045-01	1	GBM
TCGA-32-2616-01	1	GBM
TCGA-32-4213-01	1	GBM
TCGA-06-5417-01	1	GBM
TCGA-06-5858-01	1	GBM
TCGA-12-0616-01	1	GBM
TCGA-12-3653-01	1	GBM
TCGA-06-2569-01	1	GBM
TCGA-06-5416-01	1	GBM
TCGA-06-2570-01	1	GBM
TCGA-28-2510-01	2	GBM
TCGA-DU-A76K-01	2	LGG
TCGA-HT-7616-01	1	LGG
TCGA-HT-7687-01	2	LGG
TCGA-E1-A7YS-01	2	LGG
TCGA-DH-A669-01	1	LGG
TCGA-DU-A5TT-01	1	LGG
TCGA-FG-6690-01	2	LGG
TCGA-S9-A89V-01	2	LGG
TCGA-DU-7292-01	2	LGG
TCGA-S9-A7R2-01	1	LGG
TCGA-HW-A5KJ-01	2	LGG
TCGA-CS-4941-01	1	LGG
TCGA-DU-7306-01	2	LGG
TCGA-HT-7475-01	2	LGG
TCGA-DU-6393-01	2	LGG
TCGA-HT-7882-01	1	LGG
TCGA-HT-A61C-01	1	LGG
TCGA-QH-A6CX-01	1	LGG
TCGA-S9-A6UA-01	1	LGG
TCGA-TQ-A7RP-01	1	LGG
TCGA-VW-A8FI-01	1	LGG
TCGA-WH-A86K-01	2	LGG
TCGA-HT-8109-01	2	LGG
TCGA-HW-A5KK-01	1	LGG
TCGA-E1-A7YM-01	2	LGG
TCGA-FG-6692-01	1	LGG
TCGA-FG-A4MW-01	1	LGG
TCGA-TM-A84J-01	2	LGG
TCGA-FG-5964-01	2	LGG
TCGA-HT-7477-01	2	LGG
TCGA-HT-7854-01	2	LGG
TCGA-HT-8107-01	2	LGG
TCGA-HT-A74H-01	1	LGG
TCGA-IK-8125-01	2	LGG
TCGA-DB-5281-01	2	LGG
TCGA-HT-7608-01	2	LGG
TCGA-DU-A6S3-01	2	LGG
TCGA-FG-A6IZ-01	2	LGG
TCGA-HT-7694-01	2	LGG
TCGA-WY-A85D-01	2	LGG
TCGA-DB-5279-01	2	LGG
TCGA-DB-A64O-01	1	LGG
TCGA-DU-7013-01	1	LGG
TCGA-DU-7014-01	2	LGG
TCGA-HT-7688-01	2	LGG
TCGA-CS-6186-01	1	LGG
TCGA-FG-A4MU-01	1	LGG
TCGA-HT-7684-01	2	LGG
TCGA-S9-A6WD-01	2	LGG
TCGA-VM-A8CD-01	1	LGG
TCGA-E1-A7YD-01	1	LGG
TCGA-HT-8110-01	1	LGG
TCGA-S9-A7IX-01	1	LGG
TCGA-DU-6410-01	2	LGG
TCGA-DU-A7TB-01	2	LGG
TCGA-HT-7875-01	2	LGG
TCGA-DU-A7TJ-01	1	LGG
TCGA-E1-A7YJ-01	1	LGG
TCGA-HT-8011-01	1	LGG
TCGA-DB-A64V-01	2	LGG
TCGA-DU-6399-01	2	LGG
TCGA-DU-A76L-01	1	LGG
TCGA-FG-5962-01	2	LGG
TCGA-HT-7467-01	2	LGG
TCGA-HT-8105-01	2	LGG
TCGA-QH-A65Z-01	2	LGG
TCGA-VM-A8CA-01	2	LGG
TCGA-DU-6394-01	2	LGG
TCGA-DU-7301-01	2	LGG
TCGA-HT-7677-01	2	LGG
TCGA-HT-8106-01	1	LGG
TCGA-DH-A66B-01	1	LGG
TCGA-DU-6402-01	1	LGG
TCGA-DU-A7TD-01	1	LGG
TCGA-E1-A7YK-01	1	LGG
TCGA-HT-7474-01	2	LGG
TCGA-R8-A6ML-01	2	LGG
TCGA-S9-A6UB-01	2	LGG
TCGA-S9-A6WL-01	2	LGG
TCGA-DU-8164-01	2	LGG
TCGA-DU-A5TR-01	1	LGG
TCGA-DU-A76R-01	2	LGG
TCGA-QH-A6CV-01	1	LGG
TCGA-TQ-A7RU-01	2	LGG
TCGA-CS-4944-01	2	LGG
TCGA-DH-A7US-01	2	LGG
TCGA-HT-7604-01	2	LGG
TCGA-S9-A6TV-01	1	LGG
TCGA-S9-A6TY-01	2	LGG
TCGA-DH-A66F-01	2	LGG
TCGA-DH-A7UV-01	2	LGG
TCGA-FG-7637-01	2	LGG
TCGA-CS-6188-01	1	LGG
TCGA-DU-5849-01	2	LGG
TCGA-FG-7636-01	2	LGG
TCGA-QH-A6XC-01	1	LGG
TCGA-TM-A84F-01	2	LGG
TCGA-DB-A75M-01	2	LGG
TCGA-FG-A4MX-01	2	LGG
TCGA-HT-8564-01	2	LGG
TCGA-HT-A614-01	2	LGG
TCGA-HT-A617-01	1	LGG
TCGA-P5-A737-01	2	LGG
TCGA-QH-A6X4-01	2	LGG
TCGA-RY-A840-01	2	LGG
TCGA-W9-A837-01	2	LGG
TCGA-E1-A7YL-01	1	LGG
TCGA-S9-A6TX-01	2	LGG
TCGA-S9-A6U0-01	1	LGG
TCGA-S9-A7R4-01	2	LGG
TCGA-TM-A84R-01	2	LGG
TCGA-E1-A7YO-01	2	LGG
TCGA-RY-A83Y-01	2	LGG
TCGA-RY-A847-01	2	LGG
TCGA-F6-A8O4-01	2	LGG
TCGA-HT-7479-01	2	LGG
TCGA-TM-A7CA-01	2	LGG
TCGA-VV-A829-01	2	LGG
TCGA-CS-5395-01	1	LGG
TCGA-CS-6670-01	2	LGG
TCGA-DB-5280-01	2	LGG
TCGA-DH-A7UU-01	2	LGG
TCGA-HT-7692-01	2	LGG
TCGA-IK-7675-01	2	LGG
TCGA-QH-A6CW-01	2	LGG
TCGA-S9-A7J1-01	2	LGG
TCGA-DU-A5TS-01	2	LGG
TCGA-E1-5304-01	2	LGG
TCGA-E1-A7YU-01	2	LGG
TCGA-HT-7485-01	2	LGG
TCGA-S9-A6WP-01	2	LGG
TCGA-E1-5302-01	2	LGG
TCGA-FG-8188-01	2	LGG
TCGA-HW-7490-01	2	LGG
TCGA-QH-A6CS-01	1	LGG
TCGA-S9-A7QZ-01	2	LGG
TCGA-CS-5394-01	2	LGG
TCGA-DB-A64P-01	2	LGG
TCGA-DU-A7TG-01	2	LGG
TCGA-HT-7620-01	2	LGG
TCGA-R8-A6MK-01	2	LGG
TCGA-S9-A6TW-01	2	LGG
TCGA-S9-A89Z-01	1	LGG
TCGA-TM-A84B-01	1	LGG
TCGA-TM-A84M-01	2	LGG
TCGA-CS-5393-01	2	LGG
TCGA-DU-7019-01	2	LGG
TCGA-HT-7481-01	2	LGG
TCGA-HT-7855-01	2	LGG
TCGA-HW-7487-01	2	LGG
TCGA-HW-8322-01	2	LGG
TCGA-P5-A5EV-01	2	LGG
TCGA-P5-A5EZ-01	2	LGG
TCGA-S9-A7IY-01	2	LGG
TCGA-TQ-A7RH-01	2	LGG
TCGA-DB-A4XB-01	2	LGG
TCGA-E1-5303-01	2	LGG
TCGA-HT-7472-01	2	LGG
TCGA-HT-7605-01	2	LGG
TCGA-HT-7881-01	2	LGG
TCGA-HW-7489-01	2	LGG
TCGA-QH-A6CY-01	2	LGG
TCGA-QH-A6CZ-01	2	LGG
TCGA-S9-A6TU-01	2	LGG
TCGA-TQ-A7RR-01	2	LGG
TCGA-CS-4943-01	2	LGG
TCGA-FG-8185-01	2	LGG
TCGA-HT-7470-01	2	LGG
TCGA-HW-7486-01	2	LGG
TCGA-DB-5275-01	2	LGG
TCGA-HT-7478-01	2	LGG
TCGA-HT-7611-01	2	LGG
TCGA-HT-8114-01	2	LGG
TCGA-HW-8320-01	2	LGG
TCGA-S9-A6U9-01	2	LGG
TCGA-TM-A84S-01	2	LGG
TCGA-TQ-A7RG-01	2	LGG
TCGA-WY-A85C-01	2	LGG
TCGA-DU-A7T8-01	2	LGG
TCGA-E1-A7Z4-01	2	LGG
TCGA-FG-8182-01	2	LGG
TCGA-HT-7856-01	2	LGG
TCGA-HW-7491-01	2	LGG
TCGA-HW-A5KM-01	1	LGG
TCGA-P5-A5EU-01	1	LGG
TCGA-P5-A72W-01	2	LGG
TCGA-S9-A7R1-01	2	LGG
TCGA-DB-5277-01	2	LGG
TCGA-DB-A4XG-01	2	LGG
TCGA-E1-5305-01	2	LGG
TCGA-F6-A8O3-01	2	LGG
TCGA-HT-7609-01	2	LGG
TCGA-HT-A74O-01	1	LGG
TCGA-S9-A6WE-01	2	LGG
TCGA-DB-5273-01	1	LGG
TCGA-DU-7007-01	1	LGG
TCGA-DU-7299-01	2	LGG
TCGA-DU-A5TP-01	1	LGG
TCGA-HT-7480-01	2	LGG
TCGA-HT-A74J-01	2	LGG
TCGA-P5-A5F0-01	2	LGG
TCGA-QH-A86X-01	2	LGG
TCGA-S9-A6U5-01	2	LGG
TCGA-VM-A8CB-01	2	LGG
TCGA-DB-5276-01	2	LGG
TCGA-DB-A4XD-01	2	LGG
TCGA-DH-5141-01	2	LGG
TCGA-DU-A7TA-01	2	LGG
TCGA-DU-A7TC-01	2	LGG
TCGA-DU-A7TI-01	2	LGG
TCGA-HT-8111-01	2	LGG
TCGA-TM-A84C-01	1	LGG
TCGA-TQ-A7RN-01	2	LGG
TCGA-TQ-A7RW-01	2	LGG
TCGA-CS-6290-01	2	LGG
TCGA-DU-6395-01	2	LGG
TCGA-E1-5311-01	2	LGG
TCGA-FG-7641-01	2	LGG
TCGA-FG-8187-01	2	LGG
TCGA-HT-7879-01	2	LGG
TCGA-HW-8321-01	2	LGG
TCGA-S9-A6WG-01	1	LGG
TCGA-TM-A84L-01	2	LGG
TCGA-TM-A84Q-01	2	LGG
TCGA-DB-A4XA-01	2	LGG
TCGA-DH-5143-01	2	LGG
TCGA-DH-A7UT-01	2	LGG
TCGA-DU-A76O-01	2	LGG
TCGA-FG-6689-01	2	LGG
TCGA-FG-8191-01	2	LGG
TCGA-HT-7468-01	2	LGG
TCGA-HT-7469-01	1	LGG
TCGA-HT-7880-01	2	LGG
TCGA-P5-A5F1-01	1	LGG
TCGA-RY-A843-01	2	LGG
TCGA-TM-A7C5-01	2	LGG
TCGA-TM-A84I-01	1	LGG
TCGA-DB-A75O-01	2	LGG
TCGA-DH-5142-01	1	LGG
TCGA-DU-5853-01	2	LGG
TCGA-DU-8163-01	2	LGG
TCGA-HT-7603-01	2	LGG
TCGA-HT-7690-01	2	LGG
TCGA-HT-7873-01	2	LGG
TCGA-S9-A6WO-01	2	LGG
TCGA-TQ-A7RK-01	2	LGG
TCGA-TQ-A7RO-01	2	LGG
TCGA-E1-A7YW-01	2	LGG
TCGA-FG-7634-01	2	LGG
TCGA-HT-7473-01	2	LGG
TCGA-HT-7858-01	2	LGG
TCGA-S9-A6U6-01	2	LGG
TCGA-P5-A5ET-01	2	LGG
TCGA-QH-A6X3-01	2	LGG
TCGA-S9-A7R7-01	1	LGG
TCGA-TQ-A7RV-01	2	LGG
TCGA-DB-A4XC-01	2	LGG
TCGA-HT-7476-01	2	LGG
TCGA-HT-7676-01	2	LGG
TCGA-KT-A74X-01	2	LGG
TCGA-P5-A5F6-01	1	LGG
TCGA-DU-6542-01	2	LGG
TCGA-DU-7011-01	2	LGG
TCGA-FN-7833-01	2	LGG
TCGA-S9-A7J2-01	2	LGG
TCGA-VM-A8CE-01	2	LGG
TCGA-HT-A5RB-01	2	LGG
TCGA-S9-A6U8-01	2	LGG
TCGA-WY-A85B-01	2	LGG
TCGA-FG-5963-01	1	LGG
TCGA-FG-8181-01	2	LGG
TCGA-CS-6666-01	2	LGG
TCGA-HT-A61B-01	1	LGG
TCGA-P5-A730-01	2	LGG
TCGA-HT-7602-01	2	LGG
TCGA-HT-8015-01	2	LGG
TCGA-P5-A5EY-01	2	LGG
TCGA-P5-A72X-01	2	LGG
TCGA-DB-A64S-01	2	LGG
TCGA-WY-A85A-01	2	LGG
TCGA-TM-A84T-01	2	LGG
TCGA-DB-5278-01	2	LGG
TCGA-HT-7483-01	2	LGG
TCGA-DU-7012-01	1	LGG
TCGA-DU-A6S8-01	2	LGG
TCGA-FG-A713-01	2	LGG
TCGA-DU-A7T6-01	2	LGG
TCGA-QH-A6X9-01	2	LGG
TCGA-S9-A6WH-01	2	LGG
TCGA-P5-A72U-01	1	LGG
TCGA-HT-A5RC-01	1	LGG
TCGA-DU-8167-01	2	LGG
TCGA-DB-A64L-01	2	LGG
TCGA-DU-6400-01	2	LGG
TCGA-DB-A64W-01	2	LGG
TCGA-HT-A5RA-01	1	LGG
TCGA-HT-8010-01	2	LGG
TCGA-P5-A72Z-01	2	LGG
TCGA-DU-8161-01	1	LGG
TCGA-E1-A7YN-01	1	LGG
TCGA-DU-5874-01	2	LGG
TCGA-DU-A5TU-01	1	LGG
TCGA-E1-5307-01	2	LGG
TCGA-DU-5852-01	1	LGG
TCGA-DU-8162-01	2	LGG
TCGA-FG-A87Q-01	1	LGG
TCGA-HT-7607-01	2	LGG
TCGA-TM-A84O-01	2	LGG
TCGA-DU-6403-01	1	LGG
TCGA-DU-7006-01	1	LGG
TCGA-DU-8165-01	1	LGG
TCGA-HT-7860-01	1	LGG
TCGA-DH-A7UR-01	2	LGG
TCGA-DU-6406-01	1	LGG
TCGA-FG-6688-01	1	LGG
TCGA-P5-A731-01	2	LGG
TCGA-S9-A6WM-01	1	LGG
TCGA-DU-7010-01	2	LGG
TCGA-E1-A7YQ-01	1	LGG
TCGA-E1-A7Z2-01	2	LGG
TCGA-HT-7689-01	2	LGG
TCGA-HT-A74K-01	1	LGG
TCGA-QH-A6X5-01	2	LGG
TCGA-CS-6668-01	2	LGG
TCGA-DU-5854-01	1	LGG
TCGA-DU-7018-01	2	LGG
TCGA-DU-8158-01	1	LGG
TCGA-DB-A64X-01	2	LGG
TCGA-DH-5144-01	2	LGG
TCGA-QH-A6X8-01	2	LGG
TCGA-S9-A6WI-01	2	LGG
TCGA-DB-A75K-01	2	LGG
TCGA-DU-8168-01	2	LGG
TCGA-HT-A4DS-01	1	LGG
TCGA-P5-A77X-01	2	LGG
TCGA-CS-5397-01	2	LGG
TCGA-RY-A83Z-01	1	LGG
TCGA-S9-A7QW-01	2	LGG
TCGA-TM-A84G-01	2	LGG
TCGA-CS-5396-01	2	LGG
TCGA-DB-A4XH-01	2	LGG
TCGA-DU-7294-01	2	LGG
TCGA-DU-7300-01	2	LGG
TCGA-FG-A70Z-01	1	LGG
TCGA-R8-A6MO-01	2	LGG
TCGA-FG-A6J3-01	1	LGG
TCGA-P5-A733-01	2	LGG
TCGA-QH-A6CU-01	2	LGG
TCGA-S9-A7J3-01	2	LGG
TCGA-DU-6405-01	1	LGG
TCGA-HT-7693-01	2	LGG
TCGA-HT-8104-01	1	LGG
TCGA-HT-A4DV-01	2	LGG
TCGA-HT-A619-01	2	LGG
TCGA-FG-A710-01	2	LGG
TCGA-VM-A8C8-01	2	LGG
TCGA-DU-5855-01	2	LGG
TCGA-FG-7643-01	2	LGG
TCGA-HT-8113-01	2	LGG
TCGA-DU-7302-01	2	LGG
TCGA-E1-5319-01	2	LGG
TCGA-HT-A5R9-01	2	LGG
TCGA-R8-A73M-01	2	LGG
TCGA-S9-A6TS-01	2	LGG
TCGA-S9-A6U2-01	2	LGG
TCGA-S9-A7IZ-01	2	LGG
TCGA-WY-A85E-01	2	LGG
TCGA-CS-5390-01	2	LGG
TCGA-E1-A7YH-01	2	LGG
TCGA-EZ-7264-01	2	LGG
TCGA-FG-A60J-01	2	LGG
TCGA-DU-A5TY-01	1	LGG
TCGA-RY-A83X-01	2	LGG
TCGA-DU-7290-01	1	LGG
TCGA-HW-7495-01	2	LGG
TCGA-KT-A7W1-01	1	LGG
TCGA-S9-A7IQ-01	2	LGG
TCGA-CS-4942-01	2	LGG
TCGA-FG-A4MY-01	2	LGG
TCGA-FG-A6J1-01	2	LGG
TCGA-HT-7884-01	2	LGG
TCGA-P5-A736-01	2	LGG
TCGA-P5-A780-01	2	LGG
TCGA-S9-A7R8-01	2	LGG
TCGA-TM-A84H-01	2	LGG
TCGA-VM-A8CF-01	1	LGG
TCGA-DH-A66D-01	2	LGG
TCGA-DU-5872-01	2	LGG
TCGA-QH-A65V-01	2	LGG
TCGA-TM-A7C3-01	1	LGG
TCGA-E1-5318-01	2	LGG
TCGA-FG-8186-01	2	LGG
TCGA-HW-A5KL-01	2	LGG
TCGA-TQ-A8XE-01	2	LGG
TCGA-DB-A4XF-01	2	LGG
TCGA-DU-7008-01	2	LGG
TCGA-DU-7015-01	2	LGG
TCGA-DU-7309-01	2	LGG
TCGA-E1-A7Z6-01	2	LGG
TCGA-HT-7874-01	2	LGG
TCGA-P5-A5EX-01	1	LGG
TCGA-TM-A7CF-01	2	LGG
TCGA-TQ-A7RM-01	2	LGG
TCGA-HT-8018-01	2	LGG
TCGA-HW-7493-01	2	LGG
TCGA-RY-A845-01	2	LGG
TCGA-CS-6667-01	2	LGG
TCGA-FG-5965-01	2	LGG
TCGA-S9-A6TZ-01	2	LGG
TCGA-TM-A7C4-01	2	LGG
TCGA-DB-5270-01	2	LGG
TCGA-DB-A64U-01	2	LGG
TCGA-DH-5140-01	2	LGG
TCGA-DU-7298-01	2	LGG
TCGA-E1-5322-01	2	LGG
TCGA-HT-A615-01	2	LGG
TCGA-P5-A735-01	2	LGG
TCGA-QH-A65R-01	2	LGG
TCGA-QH-A870-01	2	LGG
TCGA-S9-A6WN-01	1	LGG
TCGA-TQ-A7RQ-01	2	LGG
TCGA-DB-5274-01	1	LGG
TCGA-DU-5871-01	2	LGG
TCGA-DU-A6S2-01	2	LGG
TCGA-FG-A87N-01	2	LGG
TCGA-HT-7471-01	2	LGG
TCGA-HT-A618-01	2	LGG
TCGA-P5-A77W-01	2	LGG
TCGA-TQ-A7RI-01	2	LGG
TCGA-VM-A8C9-01	1	LGG
TCGA-DB-A75L-01	2	LGG
TCGA-HT-A616-01	2	LGG
TCGA-P5-A5F2-01	2	LGG
TCGA-S9-A7QX-01	2	LGG
TCGA-VV-A86M-01	2	LGG
TCGA-DU-6392-01	1	LGG
TCGA-DU-6407-01	2	LGG
TCGA-DU-A6S6-01	2	LGG
TCGA-P5-A5F4-01	2	LGG
TCGA-S9-A7QY-01	2	LGG
TCGA-VW-A7QS-01	2	LGG
TCGA-DU-5847-01	1	LGG
TCGA-DU-5870-01	2	LGG
TCGA-FG-A60K-01	2	LGG
TCGA-FG-A60L-01	2	LGG
TCGA-HT-8019-01	2	LGG
TCGA-HW-8319-01	2	LGG
TCGA-P5-A781-01	2	LGG
TCGA-WY-A859-01	2	LGG
TCGA-DB-A4X9-01	2	LGG
TCGA-DU-A5TW-01	2	LGG
TCGA-E1-A7YI-01	1	LGG
TCGA-FG-8189-01	2	LGG
TCGA-FG-A711-01	2	LGG
TCGA-HT-A5R5-01	2	LGG
TCGA-HT-A5R7-01	2	LGG
TCGA-S9-A7IS-01	1	LGG
TCGA-DU-7009-01	2	LGG
TCGA-E1-A7YE-01	1	LGG
TCGA-HT-7680-01	1	LGG
TCGA-QH-A65S-01	2	LGG
TCGA-WY-A858-01	1	LGG
TCGA-CS-4938-01	2	LGG
TCGA-DB-A64Q-01	2	LGG
TCGA-DU-6396-01	1	LGG
TCGA-DU-6401-01	2	LGG
TCGA-E1-A7Z3-01	2	LGG
TCGA-FG-7638-01	2	LGG
TCGA-HT-7691-01	1	LGG
TCGA-HT-7601-01	2	LGG
TCGA-HT-7606-01	2	LGG
TCGA-HT-7902-01	2	LGG
TCGA-HT-8012-01	2	LGG
TCGA-HT-8563-01	1	LGG
TCGA-S9-A7J0-01	2	LGG
TCGA-DU-8166-01	2	LGG
TCGA-HT-7681-01	2	LGG
TCGA-HT-7686-01	1	LGG
TCGA-HT-7695-01	2	LGG
TCGA-HT-8558-01	2	LGG
TCGA-QH-A65X-01	2	LGG
TCGA-S9-A7R3-01	2	LGG
TCGA-DB-A4XE-01	2	LGG
TCGA-DU-A6S7-01	2	LGG
TCGA-E1-A7YY-01	2	LGG
TCGA-FG-A4MT-01	2	LGG
TCGA-TQ-A7RF-01	2	LGG
TCGA-CS-6669-01	2	LGG
TCGA-E1-A7YV-01	2	LGG
TCGA-HT-8108-01	2	LGG
TCGA-DB-A75P-01	2	LGG
TCGA-HT-7610-01	2	LGG
TCGA-TQ-A7RJ-01	2	LGG
TCGA-TQ-A7RS-01	2	LGG
TCGA-DB-A64R-01	2	LGG
TCGA-DU-6404-01	1	LGG
TCGA-HT-7857-01	1	LGG
TCGA-VM-A8CH-01	2	LGG
TCGA-DU-6408-01	2	LGG
TCGA-FG-6691-01	2	LGG
TCGA-QH-A6XA-01	2	LGG
TCGA-HT-A74L-01	2	LGG
TCGA-S9-A6U1-01	2	LGG
TCGA-FG-A70Y-01	2	LGG
TCGA-HT-7877-01	2	LGG
TCGA-HT-A61A-01	2	LGG
TCGA-P5-A5EW-01	2	LGG
TCGA-HT-7482-01	2	LGG
TCGA-R8-A6YH-01	2	LGG
