# Supplementary material for: Machine Learning-Based Analysis of Glioma Grades Reveals Co-Enrichment
Source: Cancers (Basel). 2022 Feb 17;14(4):1014. doi: 10.3390/cancers14041014 (PMC8870250; doi:10.3390/cancers14041014)
Supplement: Supplementary file 1 [file cancers-14-01014-s001.zip › Table.S3.xlsx]

## Sheet: Sheet 1
DEGs
ZNF367
DDIAS
AURKA
NRM
HASPIN
MCM8
ASF1B
NUF2
PTTG1
TP53I3
CENPA
WEE1
PKN3
SHCBP1
CDK2
CDK1
NCAPH
CDCA8
CEP55
FOXM1
KIF14
CCNB2
POLA2
KIF20A
TPX2
CHST1
DSN1
SGO1
CKS2
GTSE1
KIFC1
TGFB1I1
PRC1
PIMREG
NUSAP1
KIF2C
BIRC5
CHEK2
HJURP
KIF11
MELK
ORC1
AURKB
ASPM
KIF4A
SFRP2
FANCD2
CCDC86
CENPK
NDC80
FANCC
RASL10A
ARHGAP11A
TOP2A
CHAF1A
ERCC6L
CHEK1
IQGAP3
PCOLCE
TROAP
CDC25C
CDCA3
CCNB1
MCM10
CCNA2
GAS1
OIP5
NTSR2
MYO1C
FKBP7
SKA1
WDR76
PLK1
CEP152
SPC24
ZWINT
DEPDC1B
SMC4
UBE2C
SKA3
DTL
BUB1
NCAPG
CDCA2
CDCA5
MASTL
MYBL2
MLC1
MKI67
TRIP13
ESCO2
ESPL1
HMMR
MGME1
CENPF
PIM1
RIOK1
CEP135
HMGA1
SNRPB
RAD51AP1
KIF23
KIF18A
POC1A
RAD51
CKAP2L
ATAD2
TTK
PBK
EXO1
BRIP1
ZDHHC5
CENPM
NCAPD2
ZPR1
LMNB1
PCNA
ECT2
RRM2
KIF20B
ALDOC
CENPN
PARPBP
E2F2
LMNB2
PRIM2
C5orf34
CDC45
CBFB
CDC20
KNL1
PON1
FANCI
CENPH
CENPL
FRMD8
GEMIN6
SLC26A2
TK1
CDC6
SGO2
IGIP
TIMELESS
CAV1
ZYX
ETNPPL
VKORC1
DAP3
KPNA2
POLR1H
MLX
CCND1
SF3B3
CENPE
IKBIP
ALDH2
BUB1B
KLF10
WDR62
ZWILCH
NKIRAS2
DSCC1
GJC1
BORA
RPIA
REXO5
RFWD3
TACC3
NEK2
TONSL
CKS1B
HMGB2
HPSE2
POLQ
PPM1D
SREBF1
MCM2
ACOX2
ARHGEF39
MND1
CDCA4
JPT1
TCF19
CENPW
MGAT4C
FBLIM1
FAM111B
NR2C2AP
MCM3
EIF4A1
MCM5
CDKN3
RFC2
NDP
TRAIP
DEPDC1
C18orf54
MLXIP
KNTC1
RACGAP1
RNASEH2A
MIS18A
WDR12
LRR1
KNSTRN
DAAM2
NR3C2
ADGRL4
PAQR6
A2ML1
DAXX
DIAPH1
RAD18
ITGA5
TNFAIP8
PCLAF
MXD3
COL4A1
EGLN3
SERPINI2
C16orf87
DEK
WDHD1
NSMCE2
TRIM26
NIP7
EDEM2
CNIH4
HAUS8
IQGAP2
RTKN2
DLGAP5
KBTBD11
UBALD2
BFAR
ABT1
HSPG2
FANCE
SIDT1
CD93
RFC3
CCDC15
MAD2L1
UFD1
PMM2
MMP28
BPHL
PFN1
SLC1A4
TMEM47
LOXL2
STUM
MAP3K1
ITPRIPL1
EME1
BRCA1
YBX3
CNOT1
CENPI
E2F7
ORC6
ZSCAN16
COL4A2
CKAP2
USB1
CFAP20
SERPINH1
CDC25A
BLOC1S5
KDM4D
NEIL3
ORAI1
E2F3
DDX19B
CFAP221
PLSCR3
LRRN4CL
DYNLRB2
TPM4
SSH2
DNMT1
FANCB
NFIL3
MCAM
ITPRID2
CAPN5
PAK1IP1
TRMT6
CCNF
BRCA2
GINS1
CDT1
UPP2
PPP1R18
CLSPN
KIF15
E2F1
FBXO5
IGFN1
DGCR6
GPN1
MTFR2
GLE1
TEAD4
BZW2
KCNK4
NCAPG2
FAM72D
UCK2
DPP9
CORO1C
BTG3
EZH2
C11orf24
FAAP24
RAD54L
UBE2T
KMT5A
CENPP
POLH
DBF4
SMARCE1
SDC1
BBC3
CCT6A
B4GALT3
TBC1D31
AFAP1L1
NUP188
SPINDOC
MCM4
NOB1
HAUS1
FANCA
LYVE1
POLR3D
GABRG1
NEMP1
MCM6
HELLS
NCAPD3
N4BP1
FOXD2
MKX
PLEKHS1
ZNF90
LIX1
XRCC2
SOGA1
FAM47E
FEN1
SLC22A6
TXNDC5
SMARCAL1
PLCH1
ACVR1
PLAT
KIF6
CDC25B
RARS2
NIBAN2
DIPK1C
ANGPT2
EFNA1
ITGB1
ELOVL2
SPOCD1
VMP1
DTYMK
RRP1B
BGN
DESI2
NONO
MDH2
MSH6
BCOR
FLT4
CHAT
SVEP1
DDX39A
ADCYAP1R1
PRPF4
UTP4
CDC7
PINX1
PRR11
SNTA1
CARHSP1
NXT1
MANF
TMPO
TMEM45A
SIKE1
TUBB
MXD1
EXOSC3
FSTL5
INCENP
JAG1
TNFRSF12A
H2BC15
NRG3
RFC4
CCDC77
SLC7A11
ZSCAN9
POLD3
PRIM1
CKLF
EIF5A
TRIAP1
HROB
RCC1
CLP1
CBX8
INTS7
CDKN2C
CYP46A1
C1QBP
GINS2
STIP1
PLAU
TTPA
PRXL2C
FAM189A2
BAX
SLC25A48
POLR2D
PPM1G
ODF2
RAN
NUP93
HMGN4
GGTA1
ISG20L2
WDR53
KPNB1
TBRG4
HMGCLL1
