# Supplementary material for: Machine Learning-Based Analysis of Glioma Grades Reveals Co-Enrichment
Source: Cancers (Basel). 2022 Feb 17;14(4):1014. doi: 10.3390/cancers14041014 (PMC8870250; doi:10.3390/cancers14041014)
Supplement: Supplementary file 1 [file cancers-14-01014-s001.zip › Table.S4.xlsx]

## Sheet: Sheet 1
DEGs
RPL41
UQCRHL
LSM8
APOC2
SUPT4H1
MAGED4
SELENOT
BCKDHA
DMAC1
GOLGA4
INO80D
SAFB2
CNIH1
GOLGA3
ALMS1
SMG1
HDGFL2
SAFB
KCMF1
POTEE
RPS14
CCDC88B
KIAA0232
SLC38A10
FKBP2
GTF2A2
ZNF627
ZNF638
ZNF207
SREK1
SCYL1
N4BP2
ZBTB37
CEP250
LYPLA1
ANKRD36C
ATP5MG
NUMA1
NDUFS7
SNRPG
COX7C
UPF1
ZNF652
RBM6
ZNF37A
NONO
NIPBL
RANBP2
TCEAL3
ANKRD12
KRI1
KIF7
KIF3A
CSNK2A3
MMADHC
UBTF
MVD
RSF1
FKBP1A
CNIH4
GAK
KIAA1109
RIF1
CRTAP
LUC7L
GCC2
OLA1
TCEAL4
CTNNBL1
PPIA
RPL23A
POLD1
TIMM8B
CCDC137
COMMD4
NDUFC2
YWHAQ
MTX3
PNISR
TTC3
PTRHD1
TTBK2
METTL16
NASP
CHD2
PEX2
FAM50A
MBD3
ELOC
ZNF221
SREK1IP1
RNF139
CEP131
NFKBIL1
PPP2CA
ANKS3
CNOT7
SURF6
RAN
EDF1
RRBP1
PURA
PSMC5
RPL15
AXIN1
GRIPAP1
UBXN7
POLR2J3
SAMD8
HTATSF1
ARFRP1
MOB1B
RER1
EIF3CL
CDK11B
PELP1
ZNF707
GOLGB1
DAPK3
MACF1
DAZAP1
CCDC9
RPL10A
TELO2
RGS12
MINDY2
EIF2S3B
FAM71D
PCBP2
INTS1
C3orf38
CCDC12
ARHGEF18
CYTH1
ARHGAP4
TBL3
PSENEN
EIF3A
UBN2
BMS1
PAXX
TAF10
RESF1
RPS3A
ZGPAT
WDR46
TIMM13
CASP8AP2
SDHAF4
RAB8A
TBCD
BDP1
UBE2D2
HNRNPLL
CFAP410
KIF5B
SMG6
HELZ
SUGP2
DNAJC5
CFL2
HBE1
SCAPER
SSR3
TLR1
CEP192
SRPRB
RNF2
OSER1
SNRNP70
ZNF646
ATRAID
AKAP13
IGIP
ATP5F1E
UBXN1
CANX
SLC25A5
EWSR1
RBM15
DHX38
GRINA
ZNF33A
SSB
GLB1
PRAME
ZNF444
ASB1
PPAN
DDX54
DOHH
RNASE10
CMC4
NACA2
HYPK
ENGASE
EVI5
ZBTB17
NCK1
NXF1
LUC7L3
IFT140
SLK
PTPN11
ATAD2B
ZNF721
STK19
BTG1
HDAC4
TMEM241
PAF1
TSR3
LNPEP
ANKRD23
C6orf47
THRAP3
CYTH2
FUNDC2
CLK1
FLYWCH2
ARHGAP45
SMAD4
DAZ1
JMJD1C
PPT1
DMAP1
SEC22A
FCHSD2
FAM199X
RBM12B
TULP4
USP34
SLX1A
CKLF
TBCA
MAGEF1
RSRC2
ANTKMT
DPP8
ZSWIM9
CCHCR1
PPP1R26
RAI1
ARL5A
KCNS3
SETD2
NSMCE2
FAM184A
CAPZA1
CCZ1B
MORC2
MRFAP1
CREBZF
RPA3
TMOD2
