# Supplementary material for: Machine Learning-Based Analysis of Glioma Grades Reveals Co-Enrichment
Source: Cancers (Basel). 2022 Feb 17;14(4):1014. doi: 10.3390/cancers14041014 (PMC8870250; doi:10.3390/cancers14041014)
Supplement: Supplementary file 1 [file cancers-14-01014-s001.zip › Table.S5.xlsx]

## Sheet: Sheet 1
source	term_name	term_id	adjusted_p_value	negative_log10_of_adjusted_p_value	term_size	query_size	intersection_size	effective_domain_size	intersections
GO:MF	catalytic activity, acting on DNA	GO:0140097	2.898556653262579e-10	9.53781820677885	299	424	32	18679	MCM8,TOP2A,ERCC6L,MGME1,HMGA1,RAD51,EXO1,BRIP1,PCNA,DSCC1,POLQ,MCM2,MCM3,EIF4A1,MCM5,RFC2,RFC3,NEIL3,DDX19B,DNMT1,RAD54L,POLH,MCM4,MCM6,HELLS,XRCC2,FEN1,SMARCAL1,MSH6,DDX39A,RFC4,POLD3
GO:MF	protein binding	GO:0005515	8.182944727546657e-10	9.087090382296047	14767	424	388	18679	AURKA,NRM,HASPIN,MCM8,ASF1B,NUF2,PTTG1,TP53I3,CENPA,WEE1,PKN3,SHCBP1,CDK2,CDK1,NCAPH,CDCA8,CEP55,FOXM1,KIF14,CCNB2,POLA2,KIF20A,TPX2,CHST1,DSN1,SGO1,CKS2,GTSE1,KIFC1,TGFB1I1,PRC1,PIMREG,NUSAP1,KIF2C,BIRC5,CHEK2,HJURP,KIF11,MELK,ORC1,AURKB,ASPM,KIF4A,SFRP2,FANCD2,CCDC86,CENPK,NDC80,FANCC,TOP2A,CHAF1A,ERCC6L,CHEK1,IQGAP3,PCOLCE,TROAP,CDC25C,CDCA3,CCNB1,MCM10,CCNA2,GAS1,OIP5,MYO1C,FKBP7,SKA1,WDR76,P…
GO:MF	ATPase	GO:0016887	2.117075076053267e-9	8.674263740687472	553	424	42	18679	MCM8,KIF14,KIF20A,KIFC1,KIF2C,KIF11,ORC1,KIF4A,TOP2A,ERCC6L,MYO1C,SMC4,TRIP13,KIF23,KIF18A,RAD51,ATAD2,BRIP1,KIF20B,SLC26A2,CENPE,DSCC1,POLQ,MCM2,MCM3,EIF4A1,MCM5,RFC2,RFC3,DDX19B,KIF15,RAD54L,CCT6A,MCM4,MCM6,HELLS,XRCC2,SMARCAL1,KIF6,MSH6,DDX39A,RFC4
GO:MF	DNA replication origin binding	GO:0003688	6.018220294744648e-9	8.220531919114892	23	424	10	18679	MCM8,ORC1,MCM10,CDC45,CDC6,MCM2,MCM3,MCM5,MCM4,MCM6
GO:MF	ATPase, acting on DNA	GO:0008094	6.3350532846094475e-9	8.19824972788164	185	424	23	18679	MCM8,TOP2A,ERCC6L,RAD51,BRIP1,DSCC1,POLQ,MCM2,MCM3,EIF4A1,MCM5,RFC2,RFC3,DDX19B,RAD54L,MCM4,MCM6,HELLS,XRCC2,SMARCAL1,MSH6,DDX39A,RFC4
GO:MF	single-stranded DNA helicase activity	GO:0017116	1.5516231094494406e-8	7.809213760760797	19	424	9	18679	RAD51,DSCC1,POLQ,MCM2,MCM5,RFC2,RFC3,MCM6,RFC4
GO:MF	DNA helicase activity	GO:0003678	1.644635783387846e-8	7.78393026475251	76	424	15	18679	MCM8,ERCC6L,RAD51,BRIP1,DSCC1,POLQ,MCM2,MCM3,MCM5,RFC2,RFC3,RAD54L,MCM4,MCM6,RFC4
GO:MF	helicase activity	GO:0004386	9.620089250495727e-8	7.016820898771127	163	424	20	18679	MCM8,ERCC6L,RAD51,BRIP1,DSCC1,POLQ,MCM2,MCM3,EIF4A1,MCM5,RFC2,RFC3,DDX19B,RAD54L,MCM4,MCM6,HELLS,SMARCAL1,DDX39A,RFC4
GO:MF	enzyme binding	GO:0019899	1.6880142724367874e-7	6.772623885663957	2048	424	88	18679	AURKA,MCM8,PKN3,NCAPH,FOXM1,KIF14,KIF20A,TPX2,SGO1,CKS2,PRC1,BIRC5,CHEK2,KIF11,AURKB,FANCD2,TOP2A,IQGAP3,CDC25C,CCNB1,MCM10,CCNA2,MYO1C,WDR76,PLK1,CEP152,UBE2C,MASTL,HMGA1,RAD51,ZPR1,LMNB1,PCNA,ECT2,CDC20,FANCI,CDC6,CAV1,KPNA2,CCND1,BORA,NEK2,CKS1B,PPM1D,SREBF1,MCM2,RFC2,RACGAP1,DAAM2,A2ML1,DAXX,DIAPH1,RAD18,IQGAP2,BFAR,UFD1,PFN1,MAP3K1,BRCA1,YBX3,CDC25A,BRCA2,CDT1,PPP1R18,E2F1,FBXO5,CORO1C,UBE2T…
GO:MF	single-stranded DNA binding	GO:0003697	1.6880142724367874e-7	6.772623885663957	121	424	17	18679	MCM8,MCM10,SMC4,RAD51AP1,RAD51,CDC45,HMGB2,MCM2,MCM3,MCM5,RAD18,NEIL3,BRCA2,MCM4,MCM6,HROB,POLR2D
GO:MF	ATP binding	GO:0005524	1.6880142724367874e-7	6.772623885663957	1500	424	71	18679	AURKA,HASPIN,MCM8,WEE1,PKN3,CDK2,CDK1,KIF14,KIF20A,KIFC1,KIF2C,CHEK2,KIF11,MELK,ORC1,AURKB,KIF4A,TOP2A,ERCC6L,CHEK1,MYO1C,PLK1,SMC4,UBE2C,BUB1,MASTL,MKI67,TRIP13,PIM1,RIOK1,KIF23,KIF18A,RAD51,ATAD2,TTK,PBK,BRIP1,KIF20B,TK1,CDC6,CENPE,BUB1B,NEK2,POLQ,MCM2,MCM3,EIF4A1,MCM5,RFC2,MAP3K1,DDX19B,KIF15,UCK2,RAD54L,UBE2T,CCT6A,MCM4,MCM6,HELLS,XRCC2,SMARCAL1,ACVR1,KIF6,RARS2,DTYMK,MSH6,FLT4,DDX39A,CDC7,RF…
GO:MF	microtubule motor activity	GO:0003777	2.060812143400588e-7	6.685961595218802	67	424	13	18679	KIF14,KIF20A,KIFC1,KIF2C,KIF11,KIF4A,KIF23,KIF18A,KIF20B,CENPE,DYNLRB2,KIF15,KIF6
GO:MF	chromatin binding	GO:0003682	2.3812652672835842e-7	6.623192222528544	573	424	38	18679	MCM8,CENPA,NCAPH,CKS2,ORC1,TOP2A,CHAF1A,SMC4,CDCA5,CENPF,HMGA1,RAD51,ATAD2,EXO1,BRIP1,NCAPD2,PCNA,CDC45,POLQ,SREBF1,PCLAF,WDHD1,KDM4D,DNMT1,CDT1,EZH2,FAAP24,UBE2T,SMARCE1,POLR3D,HELLS,NCAPD3,NONO,MSH6,SVEP1,RCC1,RAN,HMGN4
GO:MF	adenyl nucleotide binding	GO:0030554	4.497246361087879e-7	6.347053320942087	1577	424	72	18679	AURKA,HASPIN,MCM8,WEE1,PKN3,CDK2,CDK1,KIF14,KIF20A,KIFC1,KIF2C,CHEK2,KIF11,MELK,ORC1,AURKB,KIF4A,TOP2A,ERCC6L,CHEK1,MYO1C,PLK1,SMC4,UBE2C,BUB1,MASTL,MKI67,TRIP13,PIM1,RIOK1,KIF23,KIF18A,RAD51,ATAD2,TTK,PBK,BRIP1,KIF20B,TK1,CDC6,CENPE,BUB1B,NEK2,POLQ,MCM2,MCM3,EIF4A1,MCM5,RFC2,PFN1,MAP3K1,DDX19B,KIF15,UCK2,RAD54L,UBE2T,CCT6A,MCM4,MCM6,HELLS,XRCC2,SMARCAL1,ACVR1,KIF6,RARS2,DTYMK,MSH6,FLT4,DDX39A,CD…
GO:MF	ATP-dependent microtubule motor activity	GO:1990939	4.6801827916761446e-7	6.329737184561345	60	424	12	18679	KIF14,KIF20A,KIFC1,KIF2C,KIF11,KIF4A,KIF23,KIF18A,KIF20B,CENPE,KIF15,KIF6
GO:MF	adenyl ribonucleotide binding	GO:0032559	6.453489734461545e-7	6.190205376438838	1564	424	71	18679	AURKA,HASPIN,MCM8,WEE1,PKN3,CDK2,CDK1,KIF14,KIF20A,KIFC1,KIF2C,CHEK2,KIF11,MELK,ORC1,AURKB,KIF4A,TOP2A,ERCC6L,CHEK1,MYO1C,PLK1,SMC4,UBE2C,BUB1,MASTL,MKI67,TRIP13,PIM1,RIOK1,KIF23,KIF18A,RAD51,ATAD2,TTK,PBK,BRIP1,KIF20B,TK1,CDC6,CENPE,BUB1B,NEK2,POLQ,MCM2,MCM3,EIF4A1,MCM5,RFC2,MAP3K1,DDX19B,KIF15,UCK2,RAD54L,UBE2T,CCT6A,MCM4,MCM6,HELLS,XRCC2,SMARCAL1,ACVR1,KIF6,RARS2,DTYMK,MSH6,FLT4,DDX39A,CDC7,RF…
GO:MF	microtubule binding	GO:0008017	8.42696869770398e-7	6.074328619279148	273	424	24	18679	KIF14,KIF20A,TPX2,GTSE1,KIFC1,PRC1,NUSAP1,KIF2C,BIRC5,KIF11,KIF4A,SKA1,PLK1,CENPF,KIF23,KIF18A,KIF20B,CENPE,RACGAP1,KNSTRN,HAUS8,DLGAP5,KIF15,KIF6
GO:MF	purine ribonucleoside triphosphate binding	GO:0035639	0.000004584632635461378	5.338695458420113	1846	424	77	18679	AURKA,HASPIN,MCM8,WEE1,PKN3,CDK2,CDK1,KIF14,KIF20A,KIFC1,KIF2C,CHEK2,KIF11,MELK,ORC1,AURKB,KIF4A,RASL10A,TOP2A,ERCC6L,CHEK1,MYO1C,PLK1,SMC4,UBE2C,BUB1,MASTL,MKI67,TRIP13,PIM1,RIOK1,KIF23,KIF18A,RAD51,ATAD2,TTK,PBK,BRIP1,KIF20B,TK1,CDC6,DAP3,CENPE,BUB1B,NKIRAS2,NEK2,POLQ,MCM2,MCM3,EIF4A1,MCM5,RFC2,MAP3K1,DDX19B,KIF15,GPN1,UCK2,RAD54L,UBE2T,CCT6A,MCM4,MCM6,HELLS,XRCC2,SMARCAL1,ACVR1,KIF6,RARS2,DTYM…
GO:MF	DNA binding	GO:0003677	0.000012757460681112517	4.894235761502663	2488	424	94	18679	ZNF367,MCM8,CENPA,FOXM1,POLA2,NUSAP1,KIF2C,HJURP,ORC1,KIF4A,TOP2A,ERCC6L,MCM10,WDR76,SMC4,MYBL2,MKI67,HMGA1,RAD51AP1,RAD51,EXO1,BRIP1,LMNB1,PCNA,PARPBP,E2F2,PRIM2,CDC45,CBFB,FANCI,CDC6,TIMELESS,MLX,KLF10,DSCC1,HMGB2,POLQ,SREBF1,MCM2,MND1,CENPW,MCM3,MCM5,RFC2,MLXIP,NR3C2,RAD18,MXD3,DEK,WDHD1,TRIM26,ABT1,RFC3,EME1,BRCA1,YBX3,E2F7,ORC6,ZSCAN16,KDM4D,NEIL3,E2F3,DNMT1,NFIL3,BRCA2,CDT1,CLSPN,E2F1,TEAD4…
GO:MF	purine nucleotide binding	GO:0017076	0.000012757460681112517	4.894235761502663	1932	424	78	18679	AURKA,HASPIN,MCM8,WEE1,PKN3,CDK2,CDK1,KIF14,KIF20A,KIFC1,KIF2C,CHEK2,KIF11,MELK,ORC1,AURKB,KIF4A,RASL10A,TOP2A,ERCC6L,CHEK1,MYO1C,PLK1,SMC4,UBE2C,BUB1,MASTL,MKI67,TRIP13,PIM1,RIOK1,KIF23,KIF18A,RAD51,ATAD2,TTK,PBK,BRIP1,KIF20B,TK1,CDC6,DAP3,CENPE,BUB1B,NKIRAS2,NEK2,POLQ,MCM2,MCM3,EIF4A1,MCM5,RFC2,PFN1,MAP3K1,DDX19B,KIF15,GPN1,UCK2,RAD54L,UBE2T,CCT6A,MCM4,MCM6,HELLS,XRCC2,SMARCAL1,ACVR1,KIF6,RARS2…
GO:MF	motor activity	GO:0003774	0.000015316398952926424	4.814843329919157	116	424	14	18679	KIF14,KIF20A,KIFC1,KIF2C,KIF11,KIF4A,MYO1C,KIF23,KIF18A,KIF20B,CENPE,DYNLRB2,KIF15,KIF6
GO:MF	purine ribonucleotide binding	GO:0032555	0.000017215634179788748	4.764076974370297	1917	424	77	18679	AURKA,HASPIN,MCM8,WEE1,PKN3,CDK2,CDK1,KIF14,KIF20A,KIFC1,KIF2C,CHEK2,KIF11,MELK,ORC1,AURKB,KIF4A,RASL10A,TOP2A,ERCC6L,CHEK1,MYO1C,PLK1,SMC4,UBE2C,BUB1,MASTL,MKI67,TRIP13,PIM1,RIOK1,KIF23,KIF18A,RAD51,ATAD2,TTK,PBK,BRIP1,KIF20B,TK1,CDC6,DAP3,CENPE,BUB1B,NKIRAS2,NEK2,POLQ,MCM2,MCM3,EIF4A1,MCM5,RFC2,MAP3K1,DDX19B,KIF15,GPN1,UCK2,RAD54L,UBE2T,CCT6A,MCM4,MCM6,HELLS,XRCC2,SMARCAL1,ACVR1,KIF6,RARS2,DTYM…
GO:MF	organic cyclic compound binding	GO:0097159	0.000021144886370713747	4.674794644340897	6291	424	191	18679	ZNF367,AURKA,HASPIN,MCM8,TP53I3,CENPA,WEE1,PKN3,CDK2,CDK1,FOXM1,KIF14,POLA2,KIF20A,KIFC1,NUSAP1,KIF2C,CHEK2,HJURP,KIF11,MELK,ORC1,AURKB,KIF4A,CCDC86,RASL10A,TOP2A,ERCC6L,CHEK1,MCM10,MYO1C,FKBP7,WDR76,PLK1,SMC4,UBE2C,BUB1,MASTL,MYBL2,MKI67,TRIP13,PIM1,RIOK1,HMGA1,SNRPB,RAD51AP1,KIF23,KIF18A,RAD51,ATAD2,TTK,PBK,EXO1,BRIP1,LMNB1,PCNA,KIF20B,PARPBP,E2F2,PRIM2,CDC45,CBFB,FANCI,TK1,CDC6,TIMELESS,CAV1,Z…
GO:MF	tubulin binding	GO:0015631	0.000021144886370713747	4.674794644340897	381	424	26	18679	KIF14,KIF20A,TPX2,GTSE1,KIFC1,PRC1,NUSAP1,KIF2C,BIRC5,KIF11,KIF4A,SKA1,PLK1,CENPF,KIF23,KIF18A,KIF20B,CENPE,RACGAP1,KNSTRN,HAUS8,DLGAP5,BRCA1,BRCA2,KIF15,KIF6
GO:MF	kinase binding	GO:0019900	0.000021144886370713747	4.674794644340897	757	424	40	18679	AURKA,FOXM1,KIF14,KIF20A,TPX2,SGO1,CKS2,PRC1,CHEK2,KIF11,AURKB,TOP2A,CDC25C,CCNB1,CCNA2,PLK1,CEP152,ZPR1,PCNA,CDC6,CAV1,CCND1,BORA,CKS1B,PPM1D,SREBF1,RACGAP1,DAXX,MAP3K1,CDC25A,E2F1,FBXO5,ACVR1,CDC25B,ANGPT2,ITGB1,SIKE1,NRG3,CDKN2C,C1QBP
GO:MF	heterocyclic compound binding	GO:1901363	0.000021144886370713747	4.674794644340897	6210	424	189	18679	ZNF367,AURKA,HASPIN,MCM8,TP53I3,CENPA,WEE1,PKN3,CDK2,CDK1,FOXM1,KIF14,POLA2,KIF20A,KIFC1,NUSAP1,KIF2C,CHEK2,HJURP,KIF11,MELK,ORC1,AURKB,KIF4A,CCDC86,RASL10A,TOP2A,ERCC6L,CHEK1,MCM10,MYO1C,FKBP7,WDR76,PLK1,SMC4,UBE2C,BUB1,MASTL,MYBL2,MKI67,TRIP13,PIM1,RIOK1,HMGA1,SNRPB,RAD51AP1,KIF23,KIF18A,RAD51,ATAD2,TTK,PBK,EXO1,BRIP1,LMNB1,PCNA,KIF20B,PARPBP,E2F2,PRIM2,CDC45,CBFB,FANCI,TK1,CDC6,TIMELESS,ZYX,ET…
GO:MF	ribonucleotide binding	GO:0032553	0.000021144886370713747	4.674794644340897	1934	424	77	18679	AURKA,HASPIN,MCM8,WEE1,PKN3,CDK2,CDK1,KIF14,KIF20A,KIFC1,KIF2C,CHEK2,KIF11,MELK,ORC1,AURKB,KIF4A,RASL10A,TOP2A,ERCC6L,CHEK1,MYO1C,PLK1,SMC4,UBE2C,BUB1,MASTL,MKI67,TRIP13,PIM1,RIOK1,KIF23,KIF18A,RAD51,ATAD2,TTK,PBK,BRIP1,KIF20B,TK1,CDC6,DAP3,CENPE,BUB1B,NKIRAS2,NEK2,POLQ,MCM2,MCM3,EIF4A1,MCM5,RFC2,MAP3K1,DDX19B,KIF15,GPN1,UCK2,RAD54L,UBE2T,CCT6A,MCM4,MCM6,HELLS,XRCC2,SMARCAL1,ACVR1,KIF6,RARS2,DTYM…
GO:MF	protein kinase binding	GO:0019901	0.000024079721802252345	4.618348534874538	677	424	37	18679	AURKA,FOXM1,KIF14,KIF20A,TPX2,CKS2,PRC1,CHEK2,KIF11,TOP2A,CDC25C,CCNB1,CCNA2,PLK1,CEP152,ZPR1,PCNA,CAV1,CCND1,BORA,CKS1B,PPM1D,SREBF1,RACGAP1,DAXX,MAP3K1,CDC25A,E2F1,FBXO5,ACVR1,CDC25B,ANGPT2,ITGB1,SIKE1,NRG3,CDKN2C,C1QBP
GO:MF	histone kinase activity	GO:0035173	0.000025197723156894707	4.598638699895833	16	424	6	18679	AURKA,HASPIN,CDK2,CDK1,AURKB,CHEK1
GO:MF	nucleoside phosphate binding	GO:1901265	0.00003409360997000188	4.46732701147141	2177	424	83	18679	AURKA,HASPIN,MCM8,TP53I3,WEE1,PKN3,CDK2,CDK1,KIF14,KIF20A,KIFC1,KIF2C,CHEK2,KIF11,MELK,ORC1,AURKB,KIF4A,RASL10A,TOP2A,ERCC6L,CHEK1,MYO1C,PLK1,SMC4,UBE2C,BUB1,MASTL,MKI67,TRIP13,PIM1,RIOK1,KIF23,KIF18A,RAD51,ATAD2,TTK,PBK,BRIP1,KIF20B,TK1,CDC6,DAP3,CENPE,ALDH2,BUB1B,NKIRAS2,NEK2,POLQ,MCM2,ACOX2,MCM3,EIF4A1,MCM5,RFC2,PFN1,MAP3K1,DDX19B,DNMT1,KIF15,GPN1,UCK2,RAD54L,UBE2T,CCT6A,MCM4,MCM6,HELLS,XRCC2,…
GO:MF	nucleotide binding	GO:0000166	0.00003409360997000188	4.46732701147141	2176	424	83	18679	AURKA,HASPIN,MCM8,TP53I3,WEE1,PKN3,CDK2,CDK1,KIF14,KIF20A,KIFC1,KIF2C,CHEK2,KIF11,MELK,ORC1,AURKB,KIF4A,RASL10A,TOP2A,ERCC6L,CHEK1,MYO1C,PLK1,SMC4,UBE2C,BUB1,MASTL,MKI67,TRIP13,PIM1,RIOK1,KIF23,KIF18A,RAD51,ATAD2,TTK,PBK,BRIP1,KIF20B,TK1,CDC6,DAP3,CENPE,ALDH2,BUB1B,NKIRAS2,NEK2,POLQ,MCM2,ACOX2,MCM3,EIF4A1,MCM5,RFC2,PFN1,MAP3K1,DDX19B,DNMT1,KIF15,GPN1,UCK2,RAD54L,UBE2T,CCT6A,MCM4,MCM6,HELLS,XRCC2,…
GO:MF	DNA secondary structure binding	GO:0000217	0.00003745330717937005	4.42650982746155	37	424	8	18679	HMGA1,RAD51AP1,HMGB2,RAD18,NEIL3,CLSPN,XRCC2,MSH6
GO:MF	damaged DNA binding	GO:0003684	0.0000853438002847832	4.068828022292689	69	424	10	18679	PCNA,HMGB2,POLQ,RAD18,BRCA1,KDM4D,NEIL3,POLH,FEN1,MSH6
GO:MF	anion binding	GO:0043168	0.00008712875974868485	4.059838467971388	2413	424	88	18679	AURKA,HASPIN,MCM8,TP53I3,WEE1,PKN3,CDK2,CDK1,KIF14,KIF20A,KIFC1,KIF2C,CHEK2,KIF11,MELK,ORC1,AURKB,KIF4A,RASL10A,TOP2A,ERCC6L,CHEK1,MYO1C,PLK1,SMC4,UBE2C,BUB1,MASTL,MKI67,TRIP13,PIM1,RIOK1,KIF23,KIF18A,RAD51,ATAD2,TTK,PBK,BRIP1,KIF20B,TK1,CDC6,ETNPPL,DAP3,CENPE,BUB1B,NKIRAS2,NEK2,POLQ,MCM2,ACOX2,MCM3,EIF4A1,MCM5,RFC2,RACGAP1,EGLN3,IQGAP2,PFN1,MAP3K1,DDX19B,KIF15,GPN1,GLE1,UCK2,RAD54L,UBE2T,CCT6A,M…
GO:MF	carbohydrate derivative binding	GO:0097367	0.0001044094780549735	3.981260075278816	2282	424	84	18679	AURKA,HASPIN,MCM8,WEE1,PKN3,CDK2,CDK1,KIF14,KIF20A,KIFC1,KIF2C,CHEK2,KIF11,MELK,ORC1,AURKB,KIF4A,RASL10A,TOP2A,ERCC6L,CHEK1,PCOLCE,MYO1C,PLK1,SMC4,UBE2C,BUB1,MASTL,MKI67,TRIP13,HMMR,PIM1,RIOK1,KIF23,KIF18A,RAD51,ATAD2,TTK,PBK,BRIP1,KIF20B,TK1,CDC6,DAP3,CENPE,BUB1B,NKIRAS2,NEK2,HPSE2,POLQ,MCM2,MCM3,EIF4A1,MCM5,RFC2,MAP3K1,DDX19B,KIF15,GPN1,UCK2,RAD54L,UBE2T,CCT6A,MCM4,LYVE1,MCM6,HELLS,XRCC2,SMARCA…
GO:MF	small molecule binding	GO:0036094	0.00013642441404849875	3.8651079028631243	2516	424	90	18679	AURKA,HASPIN,MCM8,TP53I3,WEE1,PKN3,CDK2,CDK1,KIF14,KIF20A,KIFC1,KIF2C,CHEK2,KIF11,MELK,ORC1,AURKB,KIF4A,RASL10A,TOP2A,ERCC6L,CHEK1,MYO1C,PLK1,SMC4,UBE2C,BUB1,MASTL,MKI67,TRIP13,PIM1,RIOK1,KIF23,KIF18A,RAD51,ATAD2,TTK,PBK,BRIP1,KIF20B,TK1,CDC6,CAV1,ETNPPL,DAP3,CENPE,ALDH2,BUB1B,NKIRAS2,RPIA,NEK2,POLQ,MCM2,ACOX2,MCM3,EIF4A1,MCM5,RFC2,EGLN3,SIDT1,PFN1,MAP3K1,DDX19B,DNMT1,KIF15,GPN1,GLE1,UCK2,RAD54L,…
GO:MF	binding	GO:0005488	0.0001841327762264762	3.734868898800034	17070	424	410	18679	ZNF367,AURKA,NRM,HASPIN,MCM8,ASF1B,NUF2,PTTG1,TP53I3,CENPA,WEE1,PKN3,SHCBP1,CDK2,CDK1,NCAPH,CDCA8,CEP55,FOXM1,KIF14,CCNB2,POLA2,KIF20A,TPX2,CHST1,DSN1,SGO1,CKS2,GTSE1,KIFC1,TGFB1I1,PRC1,PIMREG,NUSAP1,KIF2C,BIRC5,CHEK2,HJURP,KIF11,MELK,ORC1,AURKB,ASPM,KIF4A,SFRP2,FANCD2,CCDC86,CENPK,NDC80,FANCC,RASL10A,TOP2A,CHAF1A,ERCC6L,CHEK1,IQGAP3,PCOLCE,TROAP,CDC25C,CDCA3,CCNB1,MCM10,CCNA2,GAS1,OIP5,MYO1C,FKB…
GO:MF	nucleic acid binding	GO:0003676	0.00019600696347433358	3.707728499333537	4252	424	135	18679	ZNF367,MCM8,CENPA,FOXM1,POLA2,NUSAP1,KIF2C,HJURP,ORC1,KIF4A,CCDC86,TOP2A,ERCC6L,MCM10,WDR76,SMC4,MYBL2,MKI67,HMGA1,SNRPB,RAD51AP1,RAD51,EXO1,BRIP1,LMNB1,PCNA,PARPBP,E2F2,PRIM2,CDC45,CBFB,FANCI,CDC6,TIMELESS,ZYX,DAP3,KPNA2,POLR1H,MLX,SF3B3,KLF10,DSCC1,REXO5,HMGB2,POLQ,SREBF1,MCM2,MND1,CENPW,MCM3,EIF4A1,MCM5,RFC2,MLXIP,RNASEH2A,NR3C2,DIAPH1,RAD18,MXD3,DEK,WDHD1,TRIM26,NIP7,ABT1,SIDT1,RFC3,PFN1,EME1…
GO:MF	cyclin-dependent protein serine/threonine kinase regulator activity	GO:0016538	0.00020522481128951468	3.6877701350088774	47	424	8	18679	CCNB2,CKS2,CCNB1,CCNA2,CCND1,CKS1B,CCNF,CDKN2C
GO:MF	anaphase-promoting complex binding	GO:0010997	0.00035711035718367196	3.4471975538887416	8	424	4	18679	PLK1,CDC20,CLSPN,FBXO5
GO:MF	ATP-dependent microtubule motor activity, plus-end-directed	GO:0008574	0.0005942011082656829	3.226066542513469	17	424	5	18679	KIF14,KIF11,KIF18A,KIF20B,CENPE
GO:MF	DNA clamp loader activity	GO:0003689	0.000601206580825632	3.2209762742584225	9	424	4	18679	DSCC1,RFC2,RFC3,RFC4
GO:MF	small GTPase binding	GO:0031267	0.0006704387183448337	3.1736409128175826	263	424	18	18679	PKN3,BIRC5,IQGAP3,MYO1C,ECT2,CAV1,DAAM2,DIAPH1,IQGAP2,PFN1,YBX3,CORO1C,ADCYAP1R1,NXT1,SIKE1,RCC1,ODF2,KPNB1
GO:MF	DNA polymerase binding	GO:0070182	0.0007523972456439043	3.123552802972593	18	424	5	18679	FANCD2,RAD51,PCNA,FANCI,CDT1
GO:MF	exonuclease activity	GO:0004527	0.0020388646319508545	2.69061160774239	83	424	9	18679	MGME1,EXO1,REXO5,POLQ,CNOT1,USB1,FEN1,EXOSC3,ISG20L2
GO:MF	GTPase binding	GO:0051020	0.0027289515310857646	2.564004177766867	295	424	18	18679	PKN3,BIRC5,IQGAP3,MYO1C,ECT2,CAV1,DAAM2,DIAPH1,IQGAP2,PFN1,YBX3,CORO1C,ADCYAP1R1,NXT1,SIKE1,RCC1,ODF2,KPNB1
GO:MF	cytoskeletal protein binding	GO:0008092	0.003445579712169783	2.4627376983962144	1001	424	41	18679	KIF14,KIF20A,TPX2,GTSE1,KIFC1,PRC1,NUSAP1,KIF2C,BIRC5,KIF11,KIF4A,IQGAP3,MYO1C,SKA1,PLK1,CENPF,KIF23,KIF18A,KIF20B,ALDOC,CENPE,FBLIM1,RACGAP1,KNSTRN,DAAM2,DIAPH1,HAUS8,IQGAP2,DLGAP5,PFN1,BRCA1,TPM4,SSH2,ITPRID2,BRCA2,PPP1R18,KIF15,CORO1C,KIF6,ITGB1,SNTA1
GO:MF	kinetochore binding	GO:0043515	0.003853623517274616	2.4141307163429295	6	424	3	18679	TTK,CENPH,CENPE
GO:MF	protein threonine kinase activity	GO:0106311	0.00400029661768187	2.397907805010427	361	424	20	18679	AURKA,HASPIN,PKN3,CDK2,CDK1,CHEK2,MELK,AURKB,CHEK1,PLK1,BUB1,MASTL,PIM1,RIOK1,TTK,PBK,BUB1B,NEK2,MAP3K1,CDC7
GO:MF	protein serine kinase activity	GO:0106310	0.00400029661768187	2.397907805010427	361	424	20	18679	AURKA,HASPIN,PKN3,CDK2,CDK1,CHEK2,MELK,AURKB,CHEK1,PLK1,BUB1,MASTL,PIM1,RIOK1,TTK,PBK,BUB1B,NEK2,MAP3K1,CDC7
GO:MF	exonuclease activity, active with either ribo- or deoxyribonucleic acids and producing 5'-phosphomonoesters	GO:0016796	0.005380256189440024	2.2691970442200176	58	424	7	18679	MGME1,EXO1,CNOT1,USB1,FEN1,EXOSC3,ISG20L2
GO:MF	RNA-DNA hybrid ribonuclease activity	GO:0004523	0.006120188347053383	2.2132352123597823	7	424	3	18679	EXO1,RNASEH2A,FEN1
GO:MF	protein kinase regulator activity	GO:0019887	0.006255899954120546	2.2037102052360615	189	424	13	18679	CCNB2,TPX2,CKS2,CCNB1,CCNA2,CCND1,CKS1B,DAXX,CCNF,DBF4,INCENP,NRG3,CDKN2C
GO:MF	histone binding	GO:0042393	0.006314637689049551	2.199651562632087	240	424	15	18679	ASF1B,CKS2,HJURP,ATAD2,NCAPD2,TONSL,CKS1B,MCM2,DAXX,DEK,NCAPG2,NCAPD3,MSH6,RCC1,CBX8
GO:MF	catalytic activity	GO:0003824	0.010330307381792192	1.985886755708832	5682	424	160	18679	AURKA,HASPIN,MCM8,TP53I3,WEE1,PKN3,CDK2,CDK1,KIF14,KIF20A,CHST1,KIFC1,KIF2C,CHEK2,KIF11,MELK,AURKB,KIF4A,RASL10A,TOP2A,ERCC6L,CHEK1,CDC25C,MYO1C,FKBP7,PLK1,UBE2C,DTL,BUB1,MASTL,ESCO2,ESPL1,MGME1,PIM1,RIOK1,HMGA1,KIF23,KIF18A,RAD51,ATAD2,TTK,PBK,EXO1,BRIP1,ZDHHC5,PCNA,RRM2,KIF20B,ALDOC,PON1,TK1,ETNPPL,VKORC1,POLR1H,CCND1,CENPE,ALDH2,BUB1B,NKIRAS2,DSCC1,RPIA,REXO5,RFWD3,NEK2,CKS1B,HPSE2,POLQ,PPM1D,…
GO:MF	protein kinase activator activity	GO:0030295	0.010333195444431642	1.9857653561875195	85	424	8	18679	TPX2,CKS2,CCNB1,CKS1B,DAXX,DBF4,INCENP,NRG3
GO:MF	protein C-terminus binding	GO:0008022	0.01041134968576875	1.9824929666387203	201	424	13	18679	TOP2A,MYO1C,MKI67,CENPF,CEP135,RAD51,PCNA,CDC20,HSPG2,MAD2L1,BRCA2,SDC1,STIP1
GO:MF	cyclin-dependent protein serine/threonine kinase activator activity	GO:0061575	0.012729624045798466	1.8951844225243661	9	424	3	18679	CKS2,CCNB1,CKS1B
GO:MF	nuclease activity	GO:0004518	0.01320680742980466	1.8792021546179698	207	424	13	18679	MGME1,EXO1,REXO5,POLQ,RNASEH2A,EME1,CNOT1,USB1,NOB1,N4BP1,FEN1,EXOSC3,ISG20L2
GO:MF	ribonuclease activity	GO:0004540	0.01325654588405895	1.8775696206453496	111	424	9	18679	EXO1,RNASEH2A,CNOT1,USB1,NOB1,N4BP1,FEN1,EXOSC3,ISG20L2
GO:MF	transferase activity, transferring phosphorus-containing groups	GO:0016772	0.01325654588405895	1.8775696206453496	947	424	37	18679	AURKA,HASPIN,WEE1,PKN3,CDK2,CDK1,CHEK2,MELK,AURKB,CHEK1,PLK1,BUB1,MASTL,PIM1,RIOK1,TTK,PBK,TK1,POLR1H,CCND1,BUB1B,NEK2,CKS1B,POLQ,MAP3K1,UCK2,POLH,POLR3D,ACVR1,DTYMK,FLT4,CDC7,POLD3,PRIM1,CLP1,CDKN2C,POLR2D
GO:MF	kinase activator activity	GO:0019209	0.014652292082059934	1.8340944325980906	91	424	8	18679	TPX2,CKS2,CCNB1,CKS1B,DAXX,DBF4,INCENP,NRG3
GO:MF	protein serine/threonine kinase activity	GO:0004674	0.014807085491921666	1.8295304161133779	438	424	21	18679	AURKA,HASPIN,PKN3,CDK2,CDK1,CHEK2,MELK,AURKB,CHEK1,PLK1,BUB1,MASTL,PIM1,RIOK1,TTK,PBK,BUB1B,NEK2,MAP3K1,ACVR1,CDC7
GO:MF	kinase regulator activity	GO:0019207	0.02029134291752041	1.6926892096266337	219	424	13	18679	CCNB2,TPX2,CKS2,CCNB1,CCNA2,CCND1,CKS1B,DAXX,CCNF,DBF4,INCENP,NRG3,CDKN2C
GO:MF	mismatch repair complex binding	GO:0032404	0.021569135128312256	1.6661672687376015	11	424	3	18679	MCM8,PCNA,MSH6
GO:MF	catalytic activity, acting on RNA	GO:0140098	0.022449971324700144	1.6487842093837068	394	424	19	18679	EXO1,BRIP1,POLR1H,EIF4A1,RNASEH2A,CNOT1,USB1,DDX19B,TRMT6,NOB1,POLR3D,N4BP1,FEN1,RARS2,DDX39A,EXOSC3,PRIM1,POLR2D,ISG20L2
GO:MF	protein serine/threonine kinase activator activity	GO:0043539	0.02518173221953831	1.5989143986319814	40	424	5	18679	CKS2,CCNB1,CKS1B,DBF4,INCENP
GO:MF	double-stranded DNA exodeoxyribonuclease activity	GO:0008309	0.03687549380599226	1.4332621552637699	4	424	2	18679	EXO1,FEN1
GO:MF	nucleoside-triphosphatase activity	GO:0017111	0.04796245636032844	1.319098582945614	424	424	19	18679	KIF14,KIF20A,KIFC1,KIF2C,KIF11,KIF4A,RASL10A,MYO1C,KIF23,KIF18A,KIF20B,CENPE,NKIRAS2,DYNLRB2,KIF15,GPN1,KIF6,TUBB,RAN
GO:MF	protein kinase activity	GO:0004672	0.04796245636032844	1.319098582945614	585	424	24	18679	AURKA,HASPIN,WEE1,PKN3,CDK2,CDK1,CHEK2,MELK,AURKB,CHEK1,PLK1,BUB1,MASTL,PIM1,RIOK1,TTK,PBK,CCND1,BUB1B,NEK2,MAP3K1,ACVR1,FLT4,CDC7
GO:BP	cell cycle	GO:0007049	2.332228146211288e-72	71.6322289677234	1867	413	186	18123	DDIAS,AURKA,HASPIN,MCM8,NUF2,PTTG1,CENPA,WEE1,CDK2,CDK1,NCAPH,CDCA8,CEP55,FOXM1,KIF14,CCNB2,POLA2,KIF20A,TPX2,DSN1,SGO1,CKS2,GTSE1,KIFC1,PRC1,PIMREG,NUSAP1,KIF2C,BIRC5,CHEK2,HJURP,KIF11,MELK,ORC1,AURKB,ASPM,KIF4A,FANCD2,CENPK,NDC80,TOP2A,CHAF1A,ERCC6L,CHEK1,IQGAP3,CDC25C,CDCA3,CCNB1,CCNA2,GAS1,OIP5,SKA1,WDR76,PLK1,CEP152,SPC24,ZWINT,SMC4,UBE2C,SKA3,DTL,BUB1,NCAPG,CDCA2,CDCA5,MASTL,MYBL2,MKI67,TRI…
GO:BP	mitotic cell cycle	GO:0000278	2.332228146211288e-72	71.6322289677234	1098	413	148	18123	AURKA,HASPIN,NUF2,PTTG1,CENPA,WEE1,CDK2,CDK1,NCAPH,CDCA8,CEP55,FOXM1,KIF14,CCNB2,KIF20A,TPX2,DSN1,SGO1,CKS2,GTSE1,KIFC1,PRC1,NUSAP1,KIF2C,BIRC5,CHEK2,KIF11,MELK,ORC1,AURKB,KIF4A,FANCD2,CENPK,NDC80,ERCC6L,CHEK1,IQGAP3,CDC25C,CCNB1,CCNA2,GAS1,SKA1,PLK1,CEP152,SPC24,ZWINT,SMC4,UBE2C,SKA3,DTL,BUB1,NCAPG,CDCA5,MASTL,MYBL2,MKI67,TRIP13,ESPL1,HMMR,CENPF,CEP135,KIF23,KIF18A,RAD51,TTK,PBK,CENPM,NCAPD2,ZPR…
GO:BP	mitotic cell cycle process	GO:1903047	7.489776419069854e-72	71.12553114644119	956	413	139	18123	AURKA,HASPIN,NUF2,PTTG1,CENPA,WEE1,CDK2,CDK1,NCAPH,CDCA8,CEP55,FOXM1,KIF14,CCNB2,KIF20A,TPX2,DSN1,SGO1,CKS2,GTSE1,KIFC1,PRC1,NUSAP1,KIF2C,BIRC5,CHEK2,KIF11,MELK,ORC1,AURKB,KIF4A,FANCD2,CENPK,NDC80,ERCC6L,CHEK1,IQGAP3,CDC25C,CCNB1,CCNA2,SKA1,PLK1,CEP152,SPC24,ZWINT,SMC4,UBE2C,DTL,BUB1,NCAPG,CDCA5,MASTL,MYBL2,MKI67,TRIP13,ESPL1,HMMR,CENPF,CEP135,KIF23,KIF18A,RAD51,TTK,CENPM,NCAPD2,ZPR1,PCNA,ECT2,RR…
GO:BP	cell cycle process	GO:0022402	2.4202006408362575e-71	70.61614862840139	1388	413	162	18123	AURKA,HASPIN,NUF2,PTTG1,CENPA,WEE1,CDK2,CDK1,NCAPH,CDCA8,CEP55,FOXM1,KIF14,CCNB2,POLA2,KIF20A,TPX2,DSN1,SGO1,CKS2,GTSE1,KIFC1,PRC1,NUSAP1,KIF2C,BIRC5,CHEK2,KIF11,MELK,ORC1,AURKB,ASPM,KIF4A,FANCD2,CENPK,NDC80,TOP2A,ERCC6L,CHEK1,IQGAP3,CDC25C,CCNB1,CCNA2,SKA1,WDR76,PLK1,CEP152,SPC24,ZWINT,SMC4,UBE2C,DTL,BUB1,NCAPG,CDCA5,MASTL,MYBL2,MKI67,TRIP13,ESCO2,ESPL1,HMMR,CENPF,CEP135,RAD51AP1,KIF23,KIF18A,RA…
GO:BP	cell division	GO:0051301	3.181397830381746e-51	50.497382019438255	630	413	98	18123	AURKA,NUF2,PTTG1,CENPA,WEE1,CDK2,CDK1,NCAPH,CDCA8,CEP55,KIF14,CCNB2,KIF20A,TPX2,DSN1,SGO1,CKS2,KIFC1,PRC1,PIMREG,NUSAP1,KIF2C,BIRC5,CHEK2,KIF11,AURKB,ASPM,KIF4A,SFRP2,NDC80,TOP2A,ERCC6L,CDC25C,CDCA3,CCNB1,CCNA2,OIP5,SKA1,PLK1,SPC24,ZWINT,SMC4,UBE2C,SKA3,BUB1,NCAPG,CDCA2,CDCA5,MASTL,ESPL1,CENPF,KIF23,BRIP1,NCAPD2,ECT2,KIF20B,CDC20,KNL1,CDC6,SGO2,TIMELESS,CCND1,CENPE,BUB1B,ZWILCH,BORA,TACC3,NEK2,CK…
GO:BP	chromosome segregation	GO:0007059	1.259465351875496e-50	49.89981377552296	353	413	77	18123	HASPIN,NUF2,PTTG1,CDK1,NCAPH,CDCA8,KIF14,DSN1,SGO1,KIFC1,PRC1,NUSAP1,KIF2C,BIRC5,HJURP,AURKB,KIF4A,FANCD2,CENPK,NDC80,TOP2A,CCNB1,OIP5,SKA1,PLK1,ZWINT,SMC4,UBE2C,SKA3,BUB1,NCAPG,CDCA2,CDCA5,MKI67,TRIP13,ESCO2,ESPL1,CENPF,KIF23,KIF18A,TTK,BRIP1,NCAPD2,ECT2,CENPN,CDC20,KNL1,CENPH,CDC6,SGO2,CENPE,BUB1B,DSCC1,TACC3,NEK2,CENPW,KNTC1,RACGAP1,MIS18A,KNSTRN,RAD18,NSMCE2,DLGAP5,MAD2L1,EME1,BRCA1,CDT1,FBXO…
GO:BP	nuclear division	GO:0000280	2.296572758918795e-44	43.638919790918216	495	413	82	18123	AURKA,HASPIN,NUF2,PTTG1,CDK1,NCAPH,CDCA8,KIF14,CCNB2,TPX2,DSN1,SGO1,CKS2,KIFC1,PRC1,NUSAP1,KIF2C,CHEK2,KIF11,AURKB,ASPM,KIF4A,FANCD2,CENPK,NDC80,TOP2A,CHEK1,CDC25C,CCNB1,PLK1,ZWINT,SMC4,UBE2C,BUB1,NCAPG,CDCA5,MYBL2,MKI67,TRIP13,ESPL1,CENPF,RAD51AP1,KIF23,KIF18A,RAD51,TTK,BRIP1,NCAPD2,KIF20B,CDC20,CDC6,SGO2,CENPE,BUB1B,DSCC1,BORA,TACC3,NEK2,MND1,KNTC1,RACGAP1,KNSTRN,NSMCE2,DLGAP5,MAD2L1,EME1,BRCA2…
GO:BP	mitotic sister chromatid segregation	GO:0000070	2.663302264541589e-43	42.57457954164479	185	413	55	18123	HASPIN,NUF2,PTTG1,CDK1,NCAPH,CDCA8,KIF14,DSN1,SGO1,KIFC1,PRC1,NUSAP1,KIF2C,AURKB,KIF4A,CENPK,NDC80,CCNB1,PLK1,ZWINT,SMC4,UBE2C,BUB1,NCAPG,CDCA5,TRIP13,ESPL1,CENPF,KIF23,KIF18A,TTK,NCAPD2,CDC20,CDC6,SGO2,CENPE,BUB1B,DSCC1,TACC3,NEK2,KNTC1,RACGAP1,KNSTRN,NSMCE2,DLGAP5,MAD2L1,CDT1,FBXO5,NCAPG2,KMT5A,NCAPD3,PINX1,INCENP,RAN,KPNB1
GO:BP	sister chromatid segregation	GO:0000819	2.732726288957195e-43	42.56340386525151	214	413	58	18123	HASPIN,NUF2,PTTG1,CDK1,NCAPH,CDCA8,KIF14,DSN1,SGO1,KIFC1,PRC1,NUSAP1,KIF2C,AURKB,KIF4A,CENPK,NDC80,TOP2A,CCNB1,PLK1,ZWINT,SMC4,UBE2C,BUB1,NCAPG,CDCA5,TRIP13,ESCO2,ESPL1,CENPF,KIF23,KIF18A,TTK,NCAPD2,CDC20,CDC6,SGO2,CENPE,BUB1B,DSCC1,TACC3,NEK2,KNTC1,RACGAP1,KNSTRN,NSMCE2,DLGAP5,MAD2L1,CDT1,FBXO5,NCAPG2,KMT5A,NCAPD3,FEN1,PINX1,INCENP,RAN,KPNB1
GO:BP	organelle fission	GO:0048285	3.243531738000934e-43	42.488981848135715	544	413	84	18123	AURKA,HASPIN,NUF2,PTTG1,CDK1,NCAPH,CDCA8,KIF14,CCNB2,TPX2,DSN1,SGO1,CKS2,KIFC1,PRC1,NUSAP1,KIF2C,CHEK2,KIF11,AURKB,ASPM,KIF4A,FANCD2,CENPK,NDC80,TOP2A,CHEK1,CDC25C,CCNB1,PLK1,ZWINT,SMC4,UBE2C,BUB1,NCAPG,CDCA5,MYBL2,MKI67,TRIP13,ESPL1,CENPF,RAD51AP1,KIF23,KIF18A,RAD51,TTK,BRIP1,NCAPD2,KIF20B,CDC20,CDC6,SGO2,CENPE,BUB1B,DSCC1,BORA,TACC3,NEK2,MND1,KNTC1,RACGAP1,KNSTRN,NSMCE2,DLGAP5,MAD2L1,EME1,BRCA2…
GO:BP	chromosome organization	GO:0051276	5.4689906980028876e-43	42.26209281529961	1270	413	123	18123	AURKA,HASPIN,MCM8,ASF1B,NUF2,PTTG1,CENPA,CDK2,CDK1,NCAPH,CDCA8,KIF14,POLA2,DSN1,SGO1,KIFC1,PRC1,NUSAP1,KIF2C,HJURP,AURKB,KIF4A,FANCD2,CENPK,NDC80,TOP2A,CHAF1A,ERCC6L,CHEK1,CCNB1,CCNA2,OIP5,PLK1,ZWINT,SMC4,UBE2C,BUB1,NCAPG,CDCA5,MKI67,TRIP13,ESCO2,ESPL1,CENPF,HMGA1,KIF23,KIF18A,RAD51,ATAD2,TTK,EXO1,BRIP1,CENPM,NCAPD2,PCNA,CENPN,PRIM2,CDC45,CDC20,KNL1,CENPH,CENPL,CDC6,SGO2,CENPE,BUB1B,DSCC1,RFWD3,T…
GO:BP	mitotic nuclear division	GO:0140014	1.638733238499056e-42	41.78549173738552	346	413	69	18123	AURKA,HASPIN,NUF2,PTTG1,CDK1,NCAPH,CDCA8,KIF14,CCNB2,TPX2,DSN1,SGO1,KIFC1,PRC1,NUSAP1,KIF2C,CHEK2,KIF11,AURKB,KIF4A,CENPK,NDC80,CHEK1,CDC25C,CCNB1,PLK1,ZWINT,SMC4,UBE2C,BUB1,NCAPG,CDCA5,MYBL2,MKI67,TRIP13,ESPL1,CENPF,KIF23,KIF18A,TTK,NCAPD2,KIF20B,CDC20,CDC6,SGO2,CENPE,BUB1B,DSCC1,BORA,TACC3,NEK2,KNTC1,RACGAP1,KNSTRN,NSMCE2,DLGAP5,MAD2L1,CDT1,FBXO5,NCAPG2,KMT5A,NUP188,NCAPD3,PINX1,INCENP,RCC1,RAN…
GO:BP	spindle organization	GO:0007051	3.6093883642705165e-42	41.44256638605207	256	413	61	18123	AURKA,NUF2,CENPA,CDCA8,CCNB2,TPX2,DSN1,SGO1,KIFC1,PRC1,KIF2C,BIRC5,CHEK2,KIF11,AURKB,ASPM,KIF4A,CENPK,NDC80,ERCC6L,CCNB1,SKA1,PLK1,SPC24,ZWINT,BUB1,MYBL2,ESPL1,CENPF,KIF23,KIF18A,TTK,CENPM,CENPN,CDC20,KNL1,CENPH,CENPL,SGO2,CENPE,BUB1B,WDR62,ZWILCH,BORA,TACC3,NEK2,KNTC1,RACGAP1,KNSTRN,HAUS8,DLGAP5,MAD2L1,CENPI,FBXO5,CENPP,HAUS1,TUBB,INCENP,RCC1,RAN,KPNB1
GO:BP	microtubule cytoskeleton organization involved in mitosis	GO:1902850	5.693735444895126e-41	40.24460271588443	214	413	56	18123	AURKA,NUF2,CENPA,CDCA8,TPX2,DSN1,SGO1,KIFC1,PRC1,NUSAP1,KIF2C,BIRC5,CHEK2,KIF11,AURKB,KIF4A,CENPK,NDC80,ERCC6L,CCNB1,SKA1,PLK1,SPC24,ZWINT,BUB1,MYBL2,ESPL1,CENPF,KIF23,KIF18A,TTK,CENPM,CENPN,CDC20,KNL1,CENPH,CENPL,SGO2,CENPE,BUB1B,WDR62,ZWILCH,BORA,TACC3,NEK2,KNTC1,RACGAP1,DLGAP5,MAD2L1,CENPI,CENPP,ITGB1,INCENP,RCC1,RAN,KPNB1
GO:BP	nuclear chromosome segregation	GO:0098813	9.148803373542458e-41	40.038635706179726	293	413	63	18123	HASPIN,NUF2,PTTG1,CDK1,NCAPH,CDCA8,KIF14,DSN1,SGO1,KIFC1,PRC1,NUSAP1,KIF2C,AURKB,KIF4A,FANCD2,CENPK,NDC80,TOP2A,CCNB1,PLK1,ZWINT,SMC4,UBE2C,BUB1,NCAPG,CDCA5,TRIP13,ESCO2,ESPL1,CENPF,KIF23,KIF18A,TTK,BRIP1,NCAPD2,ECT2,CDC20,KNL1,CDC6,SGO2,CENPE,BUB1B,DSCC1,TACC3,NEK2,KNTC1,RACGAP1,KNSTRN,NSMCE2,DLGAP5,MAD2L1,EME1,CDT1,FBXO5,NCAPG2,KMT5A,NCAPD3,FEN1,PINX1,INCENP,RAN,KPNB1
GO:BP	mitotic spindle organization	GO:0007052	8.712236422017655e-40	39.059870347739825	194	413	53	18123	AURKA,NUF2,CENPA,CDCA8,TPX2,DSN1,SGO1,KIFC1,PRC1,KIF2C,BIRC5,CHEK2,KIF11,AURKB,KIF4A,CENPK,NDC80,ERCC6L,CCNB1,SKA1,PLK1,SPC24,ZWINT,BUB1,MYBL2,CENPF,KIF23,KIF18A,TTK,CENPM,CENPN,CDC20,KNL1,CENPH,CENPL,SGO2,CENPE,BUB1B,WDR62,ZWILCH,BORA,TACC3,NEK2,KNTC1,RACGAP1,DLGAP5,MAD2L1,CENPI,CENPP,INCENP,RCC1,RAN,KPNB1
GO:BP	DNA metabolic process	GO:0006259	6.10782831990839e-37	36.21411317868246	976	413	101	18123	MCM8,PTTG1,CDK2,CDK1,FOXM1,POLA2,CHEK2,ORC1,AURKB,FANCD2,FANCC,TOP2A,CHAF1A,CHEK1,MCM10,DTL,CDCA5,TRIP13,ESCO2,MGME1,CENPF,HMGA1,RAD51AP1,RAD51,EXO1,BRIP1,PCNA,PARPBP,PRIM2,CDC45,FANCI,TK1,CDC6,TIMELESS,KPNA2,DSCC1,RFWD3,NEK2,TONSL,HMGB2,POLQ,PPM1D,MCM2,MND1,MCM3,MCM5,RFC2,TRAIP,RNASEH2A,MIS18A,DAXX,RAD18,PCLAF,DEK,WDHD1,NSMCE2,FANCE,RFC3,UFD1,EME1,BRCA1,ORC6,KDM4D,NEIL3,DNMT1,FANCB,BRCA2,GINS1,C…
GO:BP	cell cycle phase transition	GO:0044770	1.2123527714992636e-36	35.916370990381594	681	413	85	18123	AURKA,WEE1,CDK2,CDK1,FOXM1,KIF14,CCNB2,TPX2,CKS2,GTSE1,CHEK2,MELK,ORC1,AURKB,FANCD2,NDC80,CHEK1,IQGAP3,CDC25C,CCNB1,CCNA2,WDR76,PLK1,CEP152,ZWINT,UBE2C,DTL,BUB1,CDCA5,MASTL,TRIP13,ESPL1,HMMR,CENPF,CEP135,TTK,BRIP1,ZPR1,PCNA,RRM2,CDC45,CDC20,CDC6,TIMELESS,CCND1,CENPE,BUB1B,ZWILCH,BORA,RFWD3,TACC3,NEK2,PPM1D,CDKN3,KNTC1,NSMCE2,HAUS8,DLGAP5,MAD2L1,EME1,BRCA1,CNOT1,E2F7,CDC25A,E2F3,CCNF,CDT1,CLSPN,E2…
GO:BP	mitotic cell cycle phase transition	GO:0044772	2.9327237741150865e-35	34.53272884019944	588	413	78	18123	AURKA,WEE1,CDK2,CDK1,FOXM1,KIF14,CCNB2,TPX2,CKS2,GTSE1,CHEK2,MELK,ORC1,AURKB,NDC80,CHEK1,IQGAP3,CDC25C,CCNB1,CCNA2,PLK1,CEP152,ZWINT,UBE2C,DTL,BUB1,CDCA5,MASTL,TRIP13,ESPL1,HMMR,CENPF,CEP135,TTK,ZPR1,PCNA,RRM2,CDC45,CDC20,CDC6,CCND1,CENPE,BUB1B,BORA,RFWD3,TACC3,NEK2,PPM1D,CDKN3,KNTC1,NSMCE2,HAUS8,DLGAP5,MAD2L1,BRCA1,CNOT1,E2F7,CDC25A,E2F3,CCNF,CDT1,CLSPN,E2F1,FBXO5,EZH2,DBF4,HAUS1,ACVR1,CDC25B,IT…
GO:BP	regulation of cell cycle	GO:0051726	9.231061412773639e-35	34.034748359731616	1120	413	105	18123	AURKA,PTTG1,WEE1,CDK2,CDK1,FOXM1,KIF14,CCNB2,KIF20A,TPX2,CKS2,GTSE1,PRC1,NUSAP1,BIRC5,CHEK2,KIF11,ORC1,AURKB,ASPM,FANCD2,NDC80,CHEK1,CDC25C,CCNB1,CCNA2,GAS1,WDR76,PLK1,CEP152,ZWINT,UBE2C,DTL,BUB1,CDCA5,MASTL,MYBL2,MKI67,TRIP13,ESPL1,HMMR,CENPF,CEP135,RAD51AP1,KIF23,RAD51,TTK,BRIP1,PCNA,ECT2,RRM2,KIF20B,E2F2,CDC45,CDC20,CDC6,TIMELESS,CCND1,CENPE,BUB1B,ZWILCH,BORA,RFWD3,TACC3,NEK2,CKS1B,CDKN3,KNTC1…
GO:BP	cellular response to DNA damage stimulus	GO:0006974	3.658233775368948e-33	32.43672854486598	894	413	92	18123	DDIAS,AURKA,MCM8,PTTG1,CDK2,CDK1,FOXM1,GTSE1,CHEK2,SFRP2,FANCD2,FANCC,TOP2A,CHAF1A,CHEK1,CDC25C,CCNB1,MCM10,WDR76,DTL,CDCA5,MASTL,TRIP13,ESCO2,MGME1,HMGA1,RAD51AP1,RAD51,EXO1,BRIP1,PCNA,PARPBP,CDC45,FANCI,TIMELESS,KPNA2,CCND1,RFWD3,TONSL,HMGB2,POLQ,PPM1D,MCM2,MCM3,MCM5,RFC2,TRAIP,RNASEH2A,RAD18,PCLAF,EGLN3,DEK,WDHD1,NSMCE2,FANCE,RFC3,UFD1,EME1,BRCA1,CNOT1,E2F7,KDM4D,NEIL3,FANCB,BRCA2,CLSPN,E2F1,F…
GO:BP	regulation of cell cycle process	GO:0010564	3.658233775368948e-33	32.43672854486598	815	413	88	18123	AURKA,PTTG1,WEE1,CDK2,CDK1,KIF14,KIF20A,TPX2,GTSE1,PRC1,NUSAP1,CHEK2,KIF11,ORC1,AURKB,FANCD2,NDC80,CHEK1,CDC25C,CCNB1,WDR76,PLK1,CEP152,ZWINT,UBE2C,DTL,BUB1,CDCA5,MKI67,TRIP13,ESPL1,HMMR,CENPF,CEP135,RAD51AP1,KIF23,RAD51,TTK,BRIP1,PCNA,ECT2,RRM2,KIF20B,CDC45,CDC20,CDC6,TIMELESS,CCND1,CENPE,BUB1B,ZWILCH,BORA,RFWD3,TACC3,NEK2,KNTC1,RACGAP1,KNSTRN,NSMCE2,HAUS8,DLGAP5,MAD2L1,EME1,BRCA1,CNOT1,E2F7,CDC…
GO:BP	microtubule cytoskeleton organization	GO:0000226	1.8380383891783178e-32	31.735645422202246	663	413	79	18123	AURKA,NUF2,CENPA,WEE1,CDK2,CDK1,CDCA8,CCNB2,KIF20A,TPX2,DSN1,SGO1,KIFC1,PRC1,NUSAP1,KIF2C,BIRC5,CHEK2,KIF11,AURKB,ASPM,KIF4A,CENPK,NDC80,ERCC6L,CHEK1,CCNB1,SKA1,PLK1,CEP152,SPC24,ZWINT,SKA3,BUB1,MYBL2,ESPL1,CENPF,CEP135,KIF23,KIF18A,TTK,CENPM,ZPR1,CENPN,CDC20,KNL1,CENPH,CENPL,SGO2,CENPE,BUB1B,WDR62,ZWILCH,BORA,TACC3,NEK2,KNTC1,RACGAP1,KNSTRN,PCLAF,HAUS8,DLGAP5,MAD2L1,BRCA1,CENPI,CKAP2,CCNF,BRCA2,…
GO:BP	DNA replication	GO:0006260	8.227972566983924e-31	30.084707164963138	338	413	57	18123	MCM8,CDK2,CDK1,POLA2,ORC1,CHAF1A,CHEK1,MCM10,CCNA2,DTL,ESCO2,MGME1,HMGA1,RAD51,EXO1,BRIP1,ZPR1,PCNA,RRM2,PRIM2,CDC45,CDC6,TIMELESS,DSCC1,RFWD3,TONSL,POLQ,MCM2,FAM111B,MCM3,MCM5,RFC2,TRAIP,RNASEH2A,PCLAF,WDHD1,RFC3,EME1,BRCA1,E2F7,ORC6,BRCA2,GINS1,CDT1,CLSPN,FBXO5,POLH,DBF4,MCM4,MCM6,FEN1,SMARCAL1,CDC7,RFC4,POLD3,PRIM1,GINS2
GO:BP	microtubule-based process	GO:0007017	1.0831131331612837e-29	28.96532617814702	927	413	89	18123	AURKA,NUF2,CENPA,WEE1,CDK2,CDK1,CDCA8,KIF14,CCNB2,KIF20A,TPX2,DSN1,SGO1,GTSE1,KIFC1,PRC1,NUSAP1,KIF2C,BIRC5,CHEK2,KIF11,AURKB,ASPM,KIF4A,CENPK,NDC80,ERCC6L,CHEK1,CCNB1,SKA1,PLK1,CEP152,SPC24,ZWINT,SKA3,BUB1,MYBL2,ESPL1,CENPF,CEP135,KIF23,KIF18A,TTK,CENPM,ZPR1,KIF20B,CENPN,CDC20,KNL1,CENPH,CENPL,SGO2,CENPE,BUB1B,WDR62,ZWILCH,BORA,TACC3,NEK2,KNTC1,RACGAP1,KNSTRN,DIAPH1,PCLAF,HAUS8,DLGAP5,MAD2L1,BRC…
GO:BP	regulation of mitotic cell cycle	GO:0007346	5.099024762636669e-29	28.29251287894244	612	413	72	18123	AURKA,WEE1,CDK2,CDK1,KIF14,TPX2,CKS2,GTSE1,NUSAP1,BIRC5,CHEK2,ORC1,AURKB,FANCD2,NDC80,CHEK1,CDC25C,CCNB1,GAS1,PLK1,CEP152,ZWINT,UBE2C,DTL,BUB1,CDCA5,MKI67,TRIP13,ESPL1,HMMR,CENPF,CEP135,TTK,PCNA,KIF20B,CDC20,CDC6,CCND1,CENPE,BUB1B,ZWILCH,BORA,RFWD3,NEK2,CKS1B,KNTC1,NSMCE2,HAUS8,DLGAP5,MAD2L1,EME1,BRCA1,CNOT1,E2F7,CDC25A,BRCA2,CDT1,CLSPN,E2F1,FBXO5,BTG3,EZH2,HAUS1,CDC25B,CDC7,PINX1,TUBB,TRIAP1,RCC…
GO:BP	DNA repair	GO:0006281	1.4211878184289122e-28	27.847348523679035	586	413	70	18123	MCM8,PTTG1,CDK2,CDK1,FOXM1,CHEK2,FANCD2,FANCC,CHAF1A,CHEK1,DTL,CDCA5,TRIP13,ESCO2,MGME1,HMGA1,RAD51AP1,RAD51,EXO1,BRIP1,PCNA,PARPBP,CDC45,FANCI,TIMELESS,KPNA2,RFWD3,TONSL,HMGB2,POLQ,MCM2,MCM3,MCM5,RFC2,TRAIP,RNASEH2A,RAD18,PCLAF,DEK,WDHD1,NSMCE2,FANCE,RFC3,UFD1,EME1,BRCA1,KDM4D,NEIL3,FANCB,BRCA2,CLSPN,FAAP24,RAD54L,UBE2T,POLH,MCM4,FANCA,MCM6,XRCC2,FEN1,SMARCAL1,NONO,MSH6,CDC7,RFC4,POLD3,HROB,CBX8…
GO:BP	regulation of cell cycle phase transition	GO:1901987	4.109843245383672e-28	27.38617474234854	543	413	67	18123	AURKA,WEE1,CDK2,CDK1,KIF14,TPX2,GTSE1,CHEK2,ORC1,AURKB,FANCD2,NDC80,CHEK1,CDC25C,CCNB1,WDR76,PLK1,CEP152,ZWINT,UBE2C,DTL,BUB1,CDCA5,TRIP13,ESPL1,HMMR,CENPF,CEP135,TTK,BRIP1,PCNA,CDC45,CDC20,CDC6,TIMELESS,CCND1,CENPE,BUB1B,ZWILCH,RFWD3,NEK2,KNTC1,NSMCE2,HAUS8,DLGAP5,MAD2L1,EME1,BRCA1,CNOT1,E2F7,CDC25A,CDT1,CLSPN,E2F1,FBXO5,EZH2,DBF4,HAUS1,CDC25B,CDC7,PINX1,TUBB,TRIAP1,INTS7,CDKN2C,BAX,ODF2
GO:BP	cell cycle checkpoint signaling	GO:0000075	1.34460598190913e-25	24.871404960979298	196	413	41	18123	AURKA,CDK2,CDK1,GTSE1,CHEK2,ORC1,AURKB,FANCD2,NDC80,CHEK1,CDC25C,CCNB1,WDR76,PLK1,ZWINT,BUB1,TRIP13,CENPF,TTK,BRIP1,PCNA,CDC45,CDC20,CDC6,TIMELESS,CCND1,BUB1B,ZWILCH,RFWD3,KNTC1,MAD2L1,EME1,BRCA1,CNOT1,E2F7,CDT1,CLSPN,E2F1,TRIAP1,INTS7,BAX
GO:BP	DNA-dependent DNA replication	GO:0006261	6.188933007062065e-25	24.208384218360788	216	413	42	18123	MCM8,CDK2,POLA2,ORC1,MCM10,MGME1,HMGA1,RAD51,ZPR1,PCNA,PRIM2,CDC45,CDC6,TIMELESS,DSCC1,RFWD3,TONSL,POLQ,MCM2,MCM3,MCM5,RFC2,TRAIP,WDHD1,RFC3,EME1,E2F7,ORC6,BRCA2,GINS1,CDT1,FBXO5,DBF4,MCM4,MCM6,FEN1,SMARCAL1,CDC7,RFC4,POLD3,PRIM1,GINS2
GO:BP	regulation of mitotic cell cycle phase transition	GO:1901990	6.188933007062065e-25	24.208384218360788	453	413	58	18123	AURKA,WEE1,CDK2,CDK1,KIF14,TPX2,GTSE1,CHEK2,ORC1,AURKB,NDC80,CHEK1,CDC25C,CCNB1,PLK1,CEP152,ZWINT,UBE2C,DTL,BUB1,CDCA5,TRIP13,ESPL1,HMMR,CENPF,CEP135,TTK,PCNA,CDC20,CDC6,CCND1,CENPE,BUB1B,RFWD3,NEK2,KNTC1,NSMCE2,HAUS8,DLGAP5,MAD2L1,BRCA1,CNOT1,E2F7,CDC25A,CDT1,CLSPN,E2F1,FBXO5,EZH2,HAUS1,CDC25B,CDC7,PINX1,TUBB,TRIAP1,CDKN2C,BAX,ODF2
GO:BP	organelle organization	GO:0006996	1.2280020874726341e-24	23.910800894939904	4136	413	192	18123	AURKA,HASPIN,MCM8,ASF1B,NUF2,PTTG1,CENPA,WEE1,CDK2,CDK1,NCAPH,CDCA8,KIF14,CCNB2,POLA2,KIF20A,TPX2,DSN1,SGO1,CKS2,KIFC1,PRC1,NUSAP1,KIF2C,BIRC5,CHEK2,HJURP,KIF11,AURKB,ASPM,KIF4A,FANCD2,CENPK,NDC80,TOP2A,CHAF1A,ERCC6L,CHEK1,IQGAP3,CDC25C,CCNB1,CCNA2,OIP5,MYO1C,SKA1,PLK1,CEP152,SPC24,ZWINT,SMC4,UBE2C,SKA3,BUB1,NCAPG,CDCA5,MYBL2,MKI67,TRIP13,ESCO2,ESPL1,MGME1,CENPF,CEP135,HMGA1,RAD51AP1,KIF23,KIF18A…
GO:BP	mitotic cell cycle checkpoint signaling	GO:0007093	9.389086525368989e-24	23.027376658669937	158	413	36	18123	AURKA,CDK2,CDK1,GTSE1,CHEK2,ORC1,AURKB,FANCD2,NDC80,CHEK1,CDC25C,CCNB1,PLK1,ZWINT,BUB1,TRIP13,CENPF,TTK,PCNA,CDC20,CDC6,CCND1,BUB1B,ZWILCH,RFWD3,KNTC1,MAD2L1,EME1,BRCA1,CNOT1,E2F7,CDT1,CLSPN,E2F1,TRIAP1,BAX
GO:BP	negative regulation of cell cycle process	GO:0010948	2.1048464974648633e-23	22.676779570961234	400	413	53	18123	AURKA,PTTG1,WEE1,CDK2,CDK1,GTSE1,CHEK2,ORC1,AURKB,FANCD2,NDC80,CHEK1,CDC25C,CCNB1,WDR76,PLK1,ZWINT,BUB1,TRIP13,ESPL1,CENPF,RAD51,TTK,BRIP1,PCNA,RRM2,CDC45,CDC20,CDC6,TIMELESS,CCND1,BUB1B,ZWILCH,RFWD3,NEK2,KNTC1,MAD2L1,EME1,BRCA1,CNOT1,E2F7,CCNF,CDT1,CLSPN,E2F1,FBXO5,EZH2,CDC7,PINX1,TRIAP1,INTS7,CDKN2C,BAX
GO:BP	DNA conformation change	GO:0071103	5.2778632669832886e-23	22.277541865189075	359	413	50	18123	MCM8,ASF1B,CENPA,CDK1,NCAPH,NUSAP1,HJURP,CENPK,TOP2A,CHAF1A,ERCC6L,CCNB1,OIP5,PLK1,SMC4,NCAPG,CDCA5,HMGA1,RAD51,BRIP1,CENPM,NCAPD2,CENPN,KNL1,CENPH,CENPL,DSCC1,HMGB2,POLQ,MCM2,CENPW,MCM3,MCM5,RFC2,MIS18A,DAXX,RFC3,CENPI,DNMT1,NCAPG2,RAD54L,KMT5A,CENPP,MCM4,MCM6,HELLS,NCAPD3,INCENP,H2BC15,RFC4
GO:BP	cell cycle DNA replication	GO:0044786	1.3814672933492101e-21	20.859659392677333	70	413	25	18123	POLA2,RAD51,ZPR1,PCNA,PRIM2,CDC45,DSCC1,MCM2,MCM3,MCM5,RFC2,RFC3,E2F7,BRCA2,GINS1,CDT1,FBXO5,DBF4,MCM4,MCM6,FEN1,CDC7,RFC4,POLD3,PRIM1
GO:BP	negative regulation of cell cycle phase transition	GO:1901988	3.809250774623049e-21	20.419160435464555	329	413	46	18123	AURKA,WEE1,CDK2,CDK1,GTSE1,CHEK2,ORC1,AURKB,FANCD2,NDC80,CHEK1,CDC25C,CCNB1,WDR76,PLK1,ZWINT,BUB1,TRIP13,CENPF,TTK,BRIP1,PCNA,CDC45,CDC20,CDC6,TIMELESS,CCND1,BUB1B,ZWILCH,RFWD3,KNTC1,MAD2L1,EME1,BRCA1,CNOT1,E2F7,CDT1,CLSPN,E2F1,FBXO5,EZH2,PINX1,TRIAP1,INTS7,CDKN2C,BAX
GO:BP	negative regulation of cell cycle	GO:0045786	5.8784412729610026e-21	20.230737816150636	487	413	55	18123	AURKA,PTTG1,WEE1,CDK2,CDK1,GTSE1,CHEK2,ORC1,AURKB,FANCD2,NDC80,CHEK1,CDC25C,CCNB1,GAS1,WDR76,PLK1,ZWINT,BUB1,TRIP13,ESPL1,CENPF,RAD51,TTK,BRIP1,PCNA,RRM2,CDC45,CDC20,CDC6,TIMELESS,CCND1,BUB1B,ZWILCH,RFWD3,NEK2,KNTC1,MAD2L1,EME1,BRCA1,CNOT1,E2F7,CCNF,CDT1,CLSPN,E2F1,FBXO5,BTG3,EZH2,CDC7,PINX1,TRIAP1,INTS7,CDKN2C,BAX
GO:BP	regulation of chromosome segregation	GO:0051983	2.238885327121485e-20	19.64996814986614	86	413	26	18123	PTTG1,KIF2C,AURKB,NDC80,CCNB1,PLK1,ZWINT,UBE2C,BUB1,MKI67,TRIP13,ESPL1,CENPF,TTK,CDC20,CDC6,CENPE,BUB1B,TACC3,KNTC1,RAD18,NSMCE2,DLGAP5,MAD2L1,CDT1,FBXO5
GO:BP	regulation of mitotic sister chromatid separation	GO:0010965	4.3325695260215664e-20	19.36325445930643	63	413	23	18123	PTTG1,AURKB,NDC80,CCNB1,PLK1,ZWINT,UBE2C,BUB1,TRIP13,ESPL1,CENPF,TTK,CDC20,CDC6,CENPE,BUB1B,TACC3,KNTC1,NSMCE2,DLGAP5,MAD2L1,CDT1,FBXO5
GO:BP	mitotic sister chromatid separation	GO:0051306	9.79371109435598e-20	19.009052711424356	65	413	23	18123	PTTG1,AURKB,NDC80,CCNB1,PLK1,ZWINT,UBE2C,BUB1,TRIP13,ESPL1,CENPF,TTK,CDC20,CDC6,CENPE,BUB1B,TACC3,KNTC1,NSMCE2,DLGAP5,MAD2L1,CDT1,FBXO5
GO:BP	chromosome separation	GO:0051304	3.573242236692422e-19	18.44693754117432	95	413	26	18123	PTTG1,AURKB,NDC80,TOP2A,CCNB1,PLK1,ZWINT,UBE2C,BUB1,TRIP13,ESPL1,CENPF,TTK,CDC20,CDC6,CENPE,BUB1B,TACC3,KNTC1,NSMCE2,DLGAP5,MAD2L1,EME1,CDT1,FBXO5,NCAPD3
GO:BP	negative regulation of mitotic cell cycle	GO:0045930	3.596677094309412e-19	18.444098550909466	318	413	43	18123	AURKA,WEE1,CDK2,CDK1,GTSE1,CHEK2,ORC1,AURKB,FANCD2,NDC80,CHEK1,CDC25C,CCNB1,GAS1,PLK1,ZWINT,BUB1,TRIP13,CENPF,TTK,PCNA,CDC20,CDC6,CCND1,BUB1B,ZWILCH,RFWD3,KNTC1,MAD2L1,EME1,BRCA1,CNOT1,E2F7,CDT1,CLSPN,E2F1,FBXO5,BTG3,EZH2,PINX1,TRIAP1,CDKN2C,BAX
GO:BP	meiotic cell cycle process	GO:1903046	3.8528134502811586e-19	18.414222018621274	200	413	35	18123	AURKA,NUF2,PTTG1,CCNB2,SGO1,CKS2,ASPM,FANCD2,TOP2A,CDC25C,PLK1,SMC4,BUB1,TRIP13,ESPL1,RAD51AP1,KIF18A,RAD51,TTK,BRIP1,NCAPD2,CDC20,SGO2,BUB1B,MND1,EME1,CDC25A,BRCA2,FBXO5,RAD54L,FANCA,NCAPD3,CDC25B,MSH6,INCENP
GO:BP	metaphase/anaphase transition of mitotic cell cycle	GO:0007091	4.2859394746819864e-19	18.367953966284677	61	413	22	18123	AURKB,NDC80,CCNB1,PLK1,ZWINT,UBE2C,BUB1,TRIP13,ESPL1,CENPF,TTK,CDC20,CDC6,CENPE,BUB1B,TACC3,KNTC1,NSMCE2,DLGAP5,MAD2L1,CDT1,FBXO5
GO:BP	cell cycle G2/M phase transition	GO:0044839	4.417413023009037e-19	18.354831992811373	273	413	40	18123	AURKA,WEE1,CDK2,CDK1,FOXM1,KIF14,CCNB2,TPX2,GTSE1,CHEK2,MELK,ORC1,AURKB,CHEK1,CDC25C,CCNB1,CCNA2,PLK1,CEP152,DTL,MASTL,HMMR,CENPF,CEP135,CDC6,CCND1,BORA,NEK2,PPM1D,HAUS8,BRCA1,CDC25A,CLSPN,FBXO5,HAUS1,CDC25B,CDC7,PINX1,TUBB,ODF2
GO:BP	meiotic cell cycle	GO:0051321	5.045174453130085e-19	18.297123812039192	259	413	39	18123	AURKA,NUF2,PTTG1,CDK2,CCNB2,SGO1,CKS2,ASPM,FANCD2,TOP2A,CDC25C,PLK1,SMC4,BUB1,TRIP13,ESPL1,RAD51AP1,KIF18A,RAD51,TTK,EXO1,BRIP1,NCAPD2,CDC20,SGO2,BUB1B,NEK2,MND1,EME1,CDC25A,BRCA2,FBXO5,RAD54L,FANCA,NCAPD3,XRCC2,CDC25B,MSH6,INCENP
GO:BP	regulation of sister chromatid segregation	GO:0033045	5.824812013963108e-19	18.234718086201667	70	413	23	18123	PTTG1,AURKB,NDC80,CCNB1,PLK1,ZWINT,UBE2C,BUB1,TRIP13,ESPL1,CENPF,TTK,CDC20,CDC6,CENPE,BUB1B,TACC3,KNTC1,NSMCE2,DLGAP5,MAD2L1,CDT1,FBXO5
GO:BP	regulation of chromosome separation	GO:1905818	5.824812013963108e-19	18.234718086201667	70	413	23	18123	PTTG1,AURKB,NDC80,CCNB1,PLK1,ZWINT,UBE2C,BUB1,TRIP13,ESPL1,CENPF,TTK,CDC20,CDC6,CENPE,BUB1B,TACC3,KNTC1,NSMCE2,DLGAP5,MAD2L1,CDT1,FBXO5
GO:BP	G2/M transition of mitotic cell cycle	GO:0000086	7.245925788530695e-19	18.139906118244713	262	413	39	18123	AURKA,WEE1,CDK2,CDK1,FOXM1,KIF14,CCNB2,TPX2,CHEK2,MELK,ORC1,AURKB,CHEK1,CDC25C,CCNB1,CCNA2,PLK1,CEP152,DTL,MASTL,HMMR,CENPF,CEP135,CDC6,CCND1,BORA,NEK2,PPM1D,HAUS8,BRCA1,CDC25A,CLSPN,FBXO5,HAUS1,CDC25B,CDC7,PINX1,TUBB,ODF2
GO:BP	regulation of mitotic nuclear division	GO:0007088	1.1629991769232621e-18	17.934420592629944	110	413	27	18123	AURKA,NUSAP1,AURKB,NDC80,CHEK1,CDC25C,CCNB1,PLK1,ZWINT,BUB1,MKI67,TRIP13,ESPL1,CENPF,TTK,KIF20B,CDC20,BUB1B,BORA,NEK2,KNTC1,NSMCE2,DLGAP5,MAD2L1,CDT1,FBXO5,RCC1
GO:BP	metaphase/anaphase transition of cell cycle	GO:0044784	1.264327711780276e-18	17.898140343006773	64	413	22	18123	AURKB,NDC80,CCNB1,PLK1,ZWINT,UBE2C,BUB1,TRIP13,ESPL1,CENPF,TTK,CDC20,CDC6,CENPE,BUB1B,TACC3,KNTC1,NSMCE2,DLGAP5,MAD2L1,CDT1,FBXO5
GO:BP	nuclear DNA replication	GO:0033260	2.6976136898524533e-18	17.56902024309172	66	413	22	18123	POLA2,RAD51,PCNA,PRIM2,CDC45,DSCC1,MCM2,MCM3,MCM5,RFC2,RFC3,BRCA2,GINS1,CDT1,DBF4,MCM4,MCM6,FEN1,CDC7,RFC4,POLD3,PRIM1
GO:BP	regulation of mitotic metaphase/anaphase transition	GO:0030071	3.946920380545012e-18	17.403741634343962	59	413	21	18123	AURKB,NDC80,CCNB1,PLK1,ZWINT,UBE2C,BUB1,TRIP13,ESPL1,CENPF,TTK,CDC20,CDC6,CENPE,BUB1B,KNTC1,NSMCE2,DLGAP5,MAD2L1,CDT1,FBXO5
GO:BP	negative regulation of mitotic cell cycle phase transition	GO:1901991	4.089026220817549e-18	17.38838010453007	260	413	38	18123	AURKA,WEE1,CDK2,CDK1,GTSE1,CHEK2,ORC1,AURKB,NDC80,CHEK1,CDC25C,CCNB1,PLK1,ZWINT,BUB1,TRIP13,CENPF,TTK,PCNA,CDC20,CDC6,CCND1,BUB1B,RFWD3,KNTC1,MAD2L1,BRCA1,CNOT1,E2F7,CDT1,CLSPN,E2F1,FBXO5,EZH2,PINX1,TRIAP1,CDKN2C,BAX
GO:BP	regulation of metaphase/anaphase transition of cell cycle	GO:1902099	1.2682549325600182e-17	16.896793439927624	62	413	21	18123	AURKB,NDC80,CCNB1,PLK1,ZWINT,UBE2C,BUB1,TRIP13,ESPL1,CENPF,TTK,CDC20,CDC6,CENPE,BUB1B,KNTC1,NSMCE2,DLGAP5,MAD2L1,CDT1,FBXO5
GO:BP	DNA packaging	GO:0006323	3.781450567530315e-17	16.422341572483035	246	413	36	18123	ASF1B,CENPA,CDK1,NCAPH,NUSAP1,HJURP,CENPK,TOP2A,CHAF1A,CCNB1,OIP5,PLK1,SMC4,NCAPG,CDCA5,HMGA1,CENPM,NCAPD2,CENPN,KNL1,CENPH,CENPL,HMGB2,MCM2,CENPW,MIS18A,DAXX,CENPI,DNMT1,NCAPG2,KMT5A,CENPP,HELLS,NCAPD3,INCENP,H2BC15
GO:BP	regulation of nuclear division	GO:0051783	4.815873985402801e-17	16.317324885570873	138	413	28	18123	AURKA,NUSAP1,AURKB,NDC80,CHEK1,CDC25C,CCNB1,PLK1,ZWINT,BUB1,MKI67,TRIP13,ESPL1,CENPF,RAD51AP1,TTK,KIF20B,CDC20,BUB1B,BORA,NEK2,KNTC1,NSMCE2,DLGAP5,MAD2L1,CDT1,FBXO5,RCC1
GO:BP	cytoskeleton organization	GO:0007010	1.772251145470261e-16	15.751474734275549	1473	413	90	18123	AURKA,NUF2,CENPA,WEE1,CDK2,CDK1,CDCA8,CCNB2,KIF20A,TPX2,DSN1,SGO1,KIFC1,PRC1,NUSAP1,KIF2C,BIRC5,CHEK2,KIF11,AURKB,ASPM,KIF4A,CENPK,NDC80,ERCC6L,CHEK1,IQGAP3,CCNB1,MYO1C,SKA1,PLK1,CEP152,SPC24,ZWINT,SKA3,BUB1,MYBL2,ESPL1,CENPF,CEP135,KIF23,KIF18A,TTK,CENPM,ZPR1,ECT2,CENPN,CDC20,KNL1,CENPH,CENPL,SGO2,ZYX,CENPE,BUB1B,WDR62,ZWILCH,BORA,TACC3,NEK2,KNTC1,RACGAP1,KNSTRN,DAAM2,DIAPH1,PCLAF,HAUS8,IQGAP2,D…
GO:BP	DNA recombination	GO:0006310	2.8576735695055783e-16	15.543987381933826	328	413	40	18123	MCM8,FANCD2,TOP2A,CHEK1,TRIP13,RAD51AP1,RAD51,EXO1,BRIP1,PARPBP,CDC45,TIMELESS,KPNA2,RFWD3,TONSL,HMGB2,POLQ,MCM2,MND1,MCM3,MCM5,DAXX,NSMCE2,EME1,BRCA1,KDM4D,FANCB,BRCA2,RAD54L,MCM4,MCM6,XRCC2,FEN1,NONO,MSH6,CDC7,EXOSC3,HROB,GINS2,POLR2D
GO:BP	double-strand break repair	GO:0006302	3.687928963796164e-16	15.433217452837622	280	413	37	18123	MCM8,FOXM1,CHEK2,FANCD2,CHEK1,CDCA5,TRIP13,ESCO2,RAD51AP1,RAD51,BRIP1,PARPBP,CDC45,TIMELESS,KPNA2,RFWD3,TONSL,HMGB2,POLQ,MCM2,MCM3,MCM5,DEK,NSMCE2,EME1,BRCA1,KDM4D,FANCB,BRCA2,RAD54L,MCM4,MCM6,XRCC2,FEN1,SMARCAL1,CDC7,GINS2
GO:BP	DNA replication initiation	GO:0006270	8.595854945545572e-16	15.06571092180794	49	413	18	18123	MCM8,CDK2,POLA2,ORC1,MCM10,PRIM2,CDC45,CDC6,MCM2,MCM3,MCM5,ORC6,CDT1,DBF4,MCM4,MCM6,CDC7,PRIM1
GO:BP	meiotic nuclear division	GO:0140013	1.536317630101147e-15	14.813518985646091	184	413	30	18123	AURKA,NUF2,PTTG1,CCNB2,SGO1,CKS2,ASPM,FANCD2,TOP2A,PLK1,SMC4,BUB1,TRIP13,ESPL1,RAD51AP1,KIF18A,RAD51,TTK,BRIP1,CDC20,SGO2,BUB1B,MND1,EME1,BRCA2,FBXO5,RAD54L,FANCA,CDC25B,INCENP
GO:BP	G1/S transition of mitotic cell cycle	GO:0000082	1.5782064340982414e-15	14.80183619040034	260	413	35	18123	AURKA,WEE1,CDK2,CDK1,KIF14,GTSE1,CHEK2,ORC1,IQGAP3,CDC25C,CCNB1,ZPR1,PCNA,RRM2,CDC45,CDC6,CCND1,RFWD3,CDKN3,CNOT1,E2F7,CDC25A,E2F3,CDT1,E2F1,FBXO5,EZH2,DBF4,ACVR1,ITGB1,CDC7,TRIAP1,RCC1,CDKN2C,BAX
GO:BP	DNA integrity checkpoint signaling	GO:0031570	1.5782064340982414e-15	14.80183619040034	144	413	27	18123	AURKA,CDK2,CDK1,GTSE1,CHEK2,ORC1,FANCD2,CHEK1,CDC25C,CCNB1,WDR76,BRIP1,PCNA,CDC45,CDC6,TIMELESS,CCND1,RFWD3,EME1,CNOT1,E2F7,CDT1,CLSPN,E2F1,TRIAP1,INTS7,BAX
GO:BP	cell cycle G1/S phase transition	GO:0044843	5.380524342445495e-15	14.26917539943872	287	413	36	18123	AURKA,WEE1,CDK2,CDK1,KIF14,GTSE1,CHEK2,ORC1,IQGAP3,CDC25C,CCNB1,CCNA2,ZPR1,PCNA,RRM2,CDC45,CDC6,CCND1,RFWD3,CDKN3,CNOT1,E2F7,CDC25A,E2F3,CDT1,E2F1,FBXO5,EZH2,DBF4,ACVR1,ITGB1,CDC7,TRIAP1,RCC1,CDKN2C,BAX
GO:BP	cellular component organization or biogenesis	GO:0071840	6.615278271221544e-15	14.179451882524985	6880	413	239	18123	AURKA,HASPIN,MCM8,ASF1B,NUF2,PTTG1,CENPA,WEE1,CDK2,CDK1,NCAPH,CDCA8,CEP55,FOXM1,KIF14,CCNB2,POLA2,KIF20A,TPX2,DSN1,SGO1,CKS2,KIFC1,PRC1,NUSAP1,KIF2C,BIRC5,CHEK2,HJURP,KIF11,ORC1,AURKB,ASPM,KIF4A,SFRP2,FANCD2,CENPK,NDC80,FANCC,TOP2A,CHAF1A,ERCC6L,CHEK1,IQGAP3,CDC25C,CCNB1,CCNA2,OIP5,MYO1C,SKA1,PLK1,CEP152,SPC24,ZWINT,SMC4,UBE2C,SKA3,BUB1,NCAPG,CDCA5,MYBL2,MKI67,TRIP13,ESCO2,ESPL1,MGME1,CENPF,RIOK1…
GO:BP	recombinational repair	GO:0000725	1.0900105843804687e-14	13.962569284888996	142	413	26	18123	MCM8,CHEK1,RAD51AP1,RAD51,PARPBP,CDC45,TIMELESS,RFWD3,TONSL,POLQ,MCM2,MCM3,MCM5,NSMCE2,BRCA1,KDM4D,FANCB,BRCA2,RAD54L,MCM4,MCM6,XRCC2,FEN1,CDC7,HROB,GINS2
GO:BP	regulation of cell cycle G2/M phase transition	GO:1902749	1.1361375896943379e-14	13.94456907106633	213	413	31	18123	AURKA,CDK2,CDK1,KIF14,TPX2,GTSE1,ORC1,AURKB,CHEK1,CDC25C,CCNB1,PLK1,CEP152,DTL,HMMR,CENPF,CEP135,CDC6,CCND1,NEK2,HAUS8,BRCA1,CDC25A,CLSPN,FBXO5,HAUS1,CDC25B,CDC7,PINX1,TUBB,ODF2
GO:BP	cellular response to stress	GO:0033554	1.150658846789135e-14	13.939053419131763	2142	413	109	18123	DDIAS,AURKA,MCM8,PTTG1,CDK2,CDK1,FOXM1,GTSE1,CHEK2,MELK,SFRP2,FANCD2,FANCC,TOP2A,CHAF1A,CHEK1,CDC25C,CCNB1,MCM10,CCNA2,WDR76,DTL,CDCA5,MASTL,TRIP13,ESCO2,MGME1,HMGA1,RAD51AP1,RAD51,PBK,EXO1,BRIP1,PCNA,ECT2,PARPBP,CDC45,FANCI,TIMELESS,CAV1,KPNA2,CCND1,KLF10,RFWD3,TONSL,HMGB2,POLQ,PPM1D,SREBF1,MCM2,MCM3,MCM5,RFC2,TRAIP,RNASEH2A,DAXX,RAD18,PCLAF,EGLN3,DEK,WDHD1,NSMCE2,EDEM2,BFAR,FANCE,RFC3,UFD1,EME1…
GO:BP	negative regulation of mitotic sister chromatid separation	GO:2000816	2.4378737283867204e-14	13.61298879276401	42	413	16	18123	PTTG1,AURKB,NDC80,CCNB1,PLK1,ZWINT,BUB1,TRIP13,CENPF,TTK,CDC20,BUB1B,KNTC1,MAD2L1,CDT1,FBXO5
GO:BP	negative regulation of mitotic sister chromatid segregation	GO:0033048	2.4378737283867204e-14	13.61298879276401	42	413	16	18123	PTTG1,AURKB,NDC80,CCNB1,PLK1,ZWINT,BUB1,TRIP13,CENPF,TTK,CDC20,BUB1B,KNTC1,MAD2L1,CDT1,FBXO5
GO:BP	negative regulation of sister chromatid segregation	GO:0033046	2.4378737283867204e-14	13.61298879276401	42	413	16	18123	PTTG1,AURKB,NDC80,CCNB1,PLK1,ZWINT,BUB1,TRIP13,CENPF,TTK,CDC20,BUB1B,KNTC1,MAD2L1,CDT1,FBXO5
GO:BP	regulation of G2/M transition of mitotic cell cycle	GO:0010389	2.4690905772196794e-14	13.607462977923413	204	413	30	18123	AURKA,CDK2,CDK1,KIF14,TPX2,ORC1,AURKB,CHEK1,CDC25C,CCNB1,PLK1,CEP152,DTL,HMMR,CENPF,CEP135,CDC6,CCND1,NEK2,HAUS8,BRCA1,CDC25A,CLSPN,FBXO5,HAUS1,CDC25B,CDC7,PINX1,TUBB,ODF2
GO:BP	positive regulation of cell cycle process	GO:0090068	3.0950958604913115e-14	13.509325895581602	237	413	32	18123	AURKA,CDK1,KIF14,NUSAP1,CHEK2,AURKB,NDC80,CDC25C,CCNB1,UBE2C,DTL,CDCA5,ESPL1,RAD51AP1,KIF23,ECT2,KIF20B,CDC6,CCND1,RACGAP1,NSMCE2,DLGAP5,MAD2L1,E2F7,CDC25A,CDT1,FBXO5,EZH2,DBF4,FEN1,CDC25B,CDC7
GO:BP	cellular component organization	GO:0016043	5.476950289346833e-14	13.261461200856925	6661	413	231	18123	AURKA,HASPIN,MCM8,ASF1B,NUF2,PTTG1,CENPA,WEE1,CDK2,CDK1,NCAPH,CDCA8,CEP55,FOXM1,KIF14,CCNB2,POLA2,KIF20A,TPX2,DSN1,SGO1,CKS2,KIFC1,PRC1,NUSAP1,KIF2C,BIRC5,CHEK2,HJURP,KIF11,ORC1,AURKB,ASPM,KIF4A,SFRP2,FANCD2,CENPK,NDC80,FANCC,TOP2A,CHAF1A,ERCC6L,CHEK1,IQGAP3,CDC25C,CCNB1,CCNA2,OIP5,MYO1C,SKA1,PLK1,CEP152,SPC24,ZWINT,SMC4,UBE2C,SKA3,BUB1,NCAPG,CDCA5,MYBL2,MKI67,TRIP13,ESCO2,ESPL1,MGME1,CENPF,CEP13…
GO:BP	negative regulation of chromosome separation	GO:1905819	5.476950289346833e-14	13.261461200856925	44	413	16	18123	PTTG1,AURKB,NDC80,CCNB1,PLK1,ZWINT,BUB1,TRIP13,CENPF,TTK,CDC20,BUB1B,KNTC1,MAD2L1,CDT1,FBXO5
GO:BP	negative regulation of chromosome segregation	GO:0051985	5.476950289346833e-14	13.261461200856925	44	413	16	18123	PTTG1,AURKB,NDC80,CCNB1,PLK1,ZWINT,BUB1,TRIP13,CENPF,TTK,CDC20,BUB1B,KNTC1,MAD2L1,CDT1,FBXO5
GO:BP	double-strand break repair via homologous recombination	GO:0000724	6.716625055587433e-14	13.17284889479113	140	413	25	18123	MCM8,CHEK1,RAD51AP1,RAD51,PARPBP,CDC45,TIMELESS,RFWD3,TONSL,POLQ,MCM2,MCM3,MCM5,NSMCE2,BRCA1,KDM4D,FANCB,BRCA2,RAD54L,MCM4,MCM6,XRCC2,FEN1,CDC7,GINS2
GO:BP	spindle assembly	GO:0051225	7.077030792598713e-14	13.150148914748478	115	413	23	18123	AURKA,CCNB2,TPX2,KIFC1,PRC1,CHEK2,KIF11,AURKB,ASPM,KIF4A,PLK1,MYBL2,KIF23,CDC20,NEK2,RACGAP1,HAUS8,FBXO5,HAUS1,TUBB,INCENP,RCC1,KPNB1
GO:BP	regulation of mitotic sister chromatid segregation	GO:0033047	8.015179467433048e-14	13.096086748937628	45	413	16	18123	PTTG1,AURKB,NDC80,CCNB1,PLK1,ZWINT,BUB1,TRIP13,CENPF,TTK,CDC20,BUB1B,KNTC1,MAD2L1,CDT1,FBXO5
GO:BP	regulation of chromosome organization	GO:0033044	1.029090091003567e-13	12.98754660355337	299	413	35	18123	PTTG1,AURKB,NDC80,TOP2A,CCNB1,PLK1,ZWINT,UBE2C,BUB1,CDCA5,TRIP13,ESPL1,CENPF,TTK,CDC20,CDC6,CENPE,BUB1B,TACC3,NEK2,SREBF1,MCM2,KNTC1,DAXX,NSMCE2,DLGAP5,MAD2L1,BRCA1,DNMT1,CDT1,FBXO5,CCT6A,FAM47E,FEN1,PINX1
GO:BP	positive regulation of cell cycle	GO:0045787	1.0330756352973812e-13	12.985867881007195	317	413	36	18123	AURKA,CDK1,KIF14,CKS2,NUSAP1,CHEK2,AURKB,NDC80,CHEK1,CDC25C,CCNB1,UBE2C,DTL,CDCA5,ESPL1,RAD51AP1,KIF23,ECT2,KIF20B,CDC6,CCND1,CKS1B,RACGAP1,NSMCE2,DLGAP5,MAD2L1,E2F7,CDC25A,BRCA2,CDT1,FBXO5,EZH2,DBF4,FEN1,CDC25B,CDC7
GO:BP	centromere complex assembly	GO:0034508	2.0831869928595168e-13	12.681271744779997	56	413	17	18123	CENPA,HJURP,CENPK,OIP5,CENPF,CENPM,CENPN,KNL1,CENPH,CENPL,CENPE,CENPW,MIS18A,DLGAP5,CENPI,CENPP,HELLS
GO:BP	negative regulation of mitotic metaphase/anaphase transition	GO:0045841	2.35164644303651e-13	12.62862797144804	40	413	15	18123	AURKB,NDC80,CCNB1,PLK1,ZWINT,BUB1,TRIP13,CENPF,TTK,CDC20,BUB1B,KNTC1,MAD2L1,CDT1,FBXO5
GO:BP	negative regulation of mitotic nuclear division	GO:0045839	2.472955541231158e-13	12.60678369131017	48	413	16	18123	AURKB,NDC80,CHEK1,CCNB1,PLK1,ZWINT,BUB1,TRIP13,CENPF,TTK,CDC20,BUB1B,KNTC1,MAD2L1,CDT1,FBXO5
GO:BP	negative regulation of metaphase/anaphase transition of cell cycle	GO:1902100	5.406278975449097e-13	12.267101547543678	42	413	15	18123	AURKB,NDC80,CCNB1,PLK1,ZWINT,BUB1,TRIP13,CENPF,TTK,CDC20,BUB1B,KNTC1,MAD2L1,CDT1,FBXO5
GO:BP	protein-DNA complex assembly	GO:0065004	6.482452556561975e-13	12.18826065303894	300	413	34	18123	MCM8,ASF1B,CENPA,HJURP,ORC1,CENPK,CHAF1A,OIP5,CENPF,RAD51,CENPM,CENPN,CDC45,KNL1,CENPH,CENPL,CDC6,CENPE,HMGB2,MCM2,CENPW,MCM3,MCM5,MIS18A,DAXX,DLGAP5,CENPI,ORC6,CDT1,CENPP,MCM4,MCM6,HELLS,H2BC15
GO:BP	negative regulation of chromosome organization	GO:2001251	8.720285752096756e-13	12.059469283585152	92	413	20	18123	PTTG1,AURKB,NDC80,TOP2A,CCNB1,PLK1,ZWINT,BUB1,TRIP13,ESPL1,CENPF,TTK,CDC20,BUB1B,MCM2,KNTC1,MAD2L1,CDT1,FBXO5,PINX1
GO:BP	kinetochore organization	GO:0051383	9.289386207906318e-13	12.032012980874578	23	413	12	18123	NUF2,CENPA,CENPK,NDC80,SMC4,CENPF,CENPN,CENPH,CENPE,CENPW,DLGAP5,CDT1
GO:BP	protein-DNA complex subunit organization	GO:0071824	1.445219723279114e-12	11.840066120136928	346	413	36	18123	MCM8,ASF1B,CENPA,HJURP,ORC1,CENPK,CHAF1A,OIP5,CENPF,HMGA1,RAD51,CENPM,CENPN,CDC45,KNL1,CENPH,CENPL,CDC6,CENPE,HMGB2,MCM2,CENPW,MCM3,MCM5,MIS18A,DAXX,DLGAP5,CENPI,ORC6,CDT1,CENPP,SMARCE1,MCM4,MCM6,HELLS,H2BC15
GO:BP	meiosis I cell cycle process	GO:0061982	1.6823876710624813e-12	11.774073922923465	133	413	23	18123	AURKA,PTTG1,CCNB2,SGO1,CKS2,FANCD2,TOP2A,CDC25C,PLK1,TRIP13,ESPL1,RAD51AP1,RAD51,BRIP1,SGO2,MND1,EME1,CDC25A,BRCA2,FBXO5,RAD54L,CDC25B,MSH6
GO:BP	mitotic spindle checkpoint signaling	GO:0071174	2.346379351731211e-12	11.629601771826282	38	413	14	18123	AURKB,NDC80,CCNB1,PLK1,ZWINT,BUB1,TRIP13,CENPF,TTK,CDC20,BUB1B,KNTC1,MAD2L1,CDT1
GO:BP	mitotic spindle assembly checkpoint signaling	GO:0007094	2.346379351731211e-12	11.629601771826282	38	413	14	18123	AURKB,NDC80,CCNB1,PLK1,ZWINT,BUB1,TRIP13,CENPF,TTK,CDC20,BUB1B,KNTC1,MAD2L1,CDT1
GO:BP	spindle assembly checkpoint signaling	GO:0071173	2.346379351731211e-12	11.629601771826282	38	413	14	18123	AURKB,NDC80,CCNB1,PLK1,ZWINT,BUB1,TRIP13,CENPF,TTK,CDC20,BUB1B,KNTC1,MAD2L1,CDT1
GO:BP	negative regulation of nuclear division	GO:0051784	3.4637584889427893e-12	11.46045239684407	56	413	16	18123	AURKB,NDC80,CHEK1,CCNB1,PLK1,ZWINT,BUB1,TRIP13,CENPF,TTK,CDC20,BUB1B,KNTC1,MAD2L1,CDT1,FBXO5
GO:BP	spindle checkpoint signaling	GO:0031577	3.511239157035714e-12	11.454539588921538	39	413	14	18123	AURKB,NDC80,CCNB1,PLK1,ZWINT,BUB1,TRIP13,CENPF,TTK,CDC20,BUB1B,KNTC1,MAD2L1,CDT1
GO:BP	interstrand cross-link repair	GO:0036297	4.619947883815125e-12	11.335362923556248	57	413	16	18123	MCM8,FANCD2,FANCC,RAD51AP1,RAD51,FANCI,RFWD3,FANCE,EME1,NEIL3,FANCB,FAAP24,UBE2T,FANCA,MSH6,HROB
GO:BP	signal transduction in response to DNA damage	GO:0042770	1.3089208949799723e-11	10.883086599371163	192	413	26	18123	AURKA,CDK2,CDK1,FOXM1,GTSE1,CHEK2,FANCD2,CHEK1,CDC25C,CCNB1,WDR76,BRIP1,PCNA,CCND1,RFWD3,PPM1D,EME1,CNOT1,E2F7,BRCA2,CLSPN,E2F1,KMT5A,TRIAP1,INTS7,BAX
GO:BP	protein localization to chromosome	GO:0034502	1.4459434880416805e-11	10.839848680285789	94	413	19	18123	HASPIN,MCM8,CENPA,CDK1,AURKB,NDC80,PLK1,CDCA5,ESCO2,TTK,KNL1,BUB1B,ZWILCH,BRCA2,CDT1,EZH2,CCT6A,FAM47E,PINX1
GO:BP	mitotic DNA integrity checkpoint signaling	GO:0044774	1.6090739026826178e-11	10.793424008859208	107	413	20	18123	AURKA,CDK2,CDK1,GTSE1,CHEK2,ORC1,FANCD2,CDC25C,CCNB1,PCNA,CDC6,CCND1,RFWD3,EME1,CNOT1,E2F7,CLSPN,E2F1,TRIAP1,BAX
GO:BP	DNA damage checkpoint signaling	GO:0000077	2.2808762334371664e-11	10.641898280086613	136	413	22	18123	AURKA,CDK2,CDK1,GTSE1,CHEK2,FANCD2,CHEK1,CDC25C,CCNB1,WDR76,BRIP1,PCNA,CCND1,RFWD3,EME1,CNOT1,E2F7,CLSPN,E2F1,TRIAP1,INTS7,BAX
GO:BP	attachment of spindle microtubules to kinetochore	GO:0008608	2.3938824696989858e-11	10.620897175572953	36	413	13	18123	NUF2,SGO1,KIF2C,AURKB,NDC80,CCNB1,ECT2,KNL1,CENPE,NEK2,RACGAP1,KNSTRN,CDT1
GO:BP	metaphase plate congression	GO:0051310	4.124549385609152e-11	10.384623491970608	65	413	16	18123	NUF2,CDCA8,KIF14,KIFC1,KIF2C,AURKB,NDC80,CCNB1,CDCA5,CENPF,KIF18A,CENPE,CDT1,PINX1,INCENP,KPNB1
GO:BP	chromatin remodeling at centromere	GO:0031055	4.460810353622507e-11	10.35058623991149	46	413	14	18123	CENPA,HJURP,CENPK,OIP5,CENPM,CENPN,KNL1,CENPH,CENPL,CENPW,MIS18A,CENPI,CENPP,HELLS
GO:BP	mitotic metaphase plate congression	GO:0007080	1.5751463489603144e-10	9.802679089116825	50	413	14	18123	NUF2,CDCA8,KIF14,KIFC1,KIF2C,AURKB,NDC80,CCNB1,CDCA5,KIF18A,CENPE,CDT1,PINX1,KPNB1
GO:BP	establishment of chromosome localization	GO:0051303	1.5751463489603144e-10	9.802679089116825	82	413	17	18123	NUF2,CDCA8,KIF14,KIFC1,KIF2C,AURKB,NDC80,CCNB1,CDCA5,CENPF,KIF18A,CENPE,DLGAP5,CDT1,PINX1,INCENP,KPNB1
GO:BP	signal transduction by p53 class mediator	GO:0072331	2.1531636676087792e-10	9.666922957060951	290	413	30	18123	AURKA,CDK2,CDK1,FOXM1,TPX2,GTSE1,CHEK2,AURKB,CHEK1,CDC25C,CCNB1,EXO1,BRIP1,PCNA,E2F2,PPM1D,RFC2,DAXX,RFC3,BRCA1,CNOT1,E2F7,PAK1IP1,BRCA2,E2F1,KMT5A,BBC3,RFC4,TRIAP1,BAX
GO:BP	chromosome localization	GO:0050000	2.3342506687855217e-10	9.631852508091496	84	413	17	18123	NUF2,CDCA8,KIF14,KIFC1,KIF2C,AURKB,NDC80,CCNB1,CDCA5,CENPF,KIF18A,CENPE,DLGAP5,CDT1,PINX1,INCENP,KPNB1
GO:BP	nucleic acid metabolic process	GO:0090304	2.4174635522429195e-10	9.616640064992263	5234	413	184	18123	ZNF367,MCM8,PTTG1,CDK2,CDK1,FOXM1,POLA2,CKS2,TGFB1I1,BIRC5,CHEK2,ORC1,AURKB,SFRP2,FANCD2,FANCC,TOP2A,CHAF1A,CHEK1,CCNB1,MCM10,CCNA2,PLK1,DTL,CDCA5,MYBL2,TRIP13,ESCO2,MGME1,CENPF,PIM1,RIOK1,HMGA1,SNRPB,RAD51AP1,RAD51,ATAD2,EXO1,BRIP1,ZPR1,PCNA,RRM2,PARPBP,E2F2,PRIM2,CDC45,CBFB,FANCI,GEMIN6,TK1,CDC6,TIMELESS,CAV1,KPNA2,POLR1H,MLX,CCND1,SF3B3,KLF10,DSCC1,REXO5,RFWD3,NEK2,TONSL,HMGB2,POLQ,PPM1D,SREBF…
GO:BP	CENP-A containing chromatin organization	GO:0061641	3.014865140449835e-10	9.520732109748833	43	413	13	18123	CENPA,HJURP,CENPK,OIP5,CENPM,CENPN,KNL1,CENPH,CENPL,CENPW,MIS18A,CENPI,CENPP
GO:BP	CENP-A containing nucleosome assembly	GO:0034080	3.014865140449835e-10	9.520732109748833	43	413	13	18123	CENPA,HJURP,CENPK,OIP5,CENPM,CENPN,KNL1,CENPH,CENPL,CENPW,MIS18A,CENPI,CENPP
GO:BP	DNA replication-independent nucleosome assembly	GO:0006336	3.5925303949797853e-10	9.444599548784229	53	413	14	18123	ASF1B,CENPA,HJURP,CENPK,OIP5,CENPM,CENPN,KNL1,CENPH,CENPL,CENPW,MIS18A,CENPI,CENPP
GO:BP	meiosis I	GO:0007127	4.5990066962972585e-10	9.337335958079185	128	413	20	18123	AURKA,PTTG1,CCNB2,SGO1,CKS2,FANCD2,TOP2A,PLK1,TRIP13,ESPL1,RAD51AP1,RAD51,BRIP1,SGO2,MND1,EME1,BRCA2,FBXO5,RAD54L,CDC25B
GO:BP	DNA replication-independent nucleosome organization	GO:0034724	4.667747361640795e-10	9.330892657856854	54	413	14	18123	ASF1B,CENPA,HJURP,CENPK,OIP5,CENPM,CENPN,KNL1,CENPH,CENPL,CENPW,MIS18A,CENPI,CENPP
GO:BP	mitotic G1 DNA damage checkpoint signaling	GO:0031571	5.282280412225752e-10	9.277178547799705	65	413	15	18123	AURKA,CDK2,CDK1,GTSE1,CHEK2,CDC25C,CCNB1,PCNA,CCND1,RFWD3,CNOT1,E2F7,E2F1,TRIAP1,BAX
GO:BP	centrosome cycle	GO:0007098	6.011071557147858e-10	9.221048102061415	130	413	20	18123	AURKA,CDK2,CDK1,SGO1,KIF11,NDC80,CHEK1,PLK1,CEP152,CEP135,WDR62,NEK2,PCLAF,HAUS8,BRCA1,CCNF,BRCA2,HAUS1,XRCC2,ODF2
GO:BP	mitotic G1/S transition checkpoint signaling	GO:0044819	6.526497971066395e-10	9.185319792663448	66	413	15	18123	AURKA,CDK2,CDK1,GTSE1,CHEK2,CDC25C,CCNB1,PCNA,CCND1,RFWD3,CNOT1,E2F7,E2F1,TRIAP1,BAX
GO:BP	mitotic spindle assembly	GO:0090307	6.526497971066395e-10	9.185319792663448	66	413	15	18123	TPX2,KIFC1,PRC1,CHEK2,KIF11,AURKB,KIF4A,PLK1,MYBL2,KIF23,CDC20,NEK2,RACGAP1,RCC1,KPNB1
GO:BP	mitotic DNA damage checkpoint signaling	GO:0044773	6.836936815293446e-10	9.165138433687236	103	413	18	18123	AURKA,CDK2,CDK1,GTSE1,CHEK2,FANCD2,CDC25C,CCNB1,PCNA,CCND1,RFWD3,EME1,CNOT1,E2F7,CLSPN,E2F1,TRIAP1,BAX
GO:BP	regulation of DNA-dependent DNA replication	GO:0090329	9.880681246312732e-10	9.005213110947313	47	413	13	18123	PCNA,TIMELESS,DSCC1,RFC2,RFC3,E2F7,BRCA2,CDT1,FBXO5,DBF4,SMARCAL1,CDC7,RFC4
GO:BP	double-strand break repair via break-induced replication	GO:0000727	1.1799606352614633e-9	8.928132480976835	12	413	8	18123	CDC45,MCM2,MCM3,MCM5,MCM4,MCM6,CDC7,GINS2
GO:BP	nucleobase-containing compound metabolic process	GO:0006139	1.7768156399029817e-9	8.750357631691871	5752	413	194	18123	ZNF367,MCM8,PTTG1,CDK2,CDK1,FOXM1,POLA2,CKS2,TGFB1I1,BIRC5,CHEK2,ORC1,AURKB,SFRP2,FANCD2,FANCC,TOP2A,CHAF1A,CHEK1,CCNB1,MCM10,CCNA2,PLK1,DTL,CDCA5,MYBL2,TRIP13,ESCO2,MGME1,CENPF,PIM1,RIOK1,HMGA1,SNRPB,RAD51AP1,RAD51,ATAD2,EXO1,BRIP1,ZPR1,PCNA,RRM2,ALDOC,PARPBP,E2F2,PRIM2,CDC45,CBFB,FANCI,GEMIN6,SLC26A2,TK1,CDC6,TIMELESS,CAV1,KPNA2,POLR1H,MLX,CCND1,SF3B3,KLF10,DSCC1,REXO5,RFWD3,NEK2,TONSL,HMGB2,PO…
GO:BP	regulation of organelle organization	GO:0033043	1.976703552635446e-9	8.704058457195247	1228	413	66	18123	AURKA,PTTG1,TPX2,NUSAP1,AURKB,NDC80,TOP2A,CHEK1,IQGAP3,CDC25C,CCNB1,MYO1C,SKA1,PLK1,ZWINT,UBE2C,SKA3,BUB1,CDCA5,MKI67,TRIP13,ESPL1,CENPF,CEP135,RAD51AP1,KIF18A,TTK,ECT2,KIF20B,CDC20,CDC6,CENPE,BUB1B,BORA,TACC3,NEK2,SREBF1,MCM2,KNTC1,DAXX,DIAPH1,NSMCE2,IQGAP2,DLGAP5,MAD2L1,PFN1,BRCA1,CNOT1,CKAP2,PLSCR3,SSH2,DNMT1,CCNF,CDT1,E2F1,FBXO5,SDC1,BBC3,CCT6A,FAM47E,FEN1,PINX1,TRIAP1,RCC1,BAX,ODF2
GO:BP	microtubule organizing center organization	GO:0031023	2.5751908558479042e-9	8.589190578440277	141	413	20	18123	AURKA,CDK2,CDK1,SGO1,KIF11,NDC80,CHEK1,PLK1,CEP152,CEP135,WDR62,NEK2,PCLAF,HAUS8,BRCA1,CCNF,BRCA2,HAUS1,XRCC2,ODF2
GO:BP	mitotic chromosome condensation	GO:0007076	2.6744100180069742e-9	8.57277200959938	41	413	12	18123	CDK1,NCAPH,NUSAP1,CCNB1,PLK1,SMC4,NCAPG,CDCA5,NCAPD2,NCAPG2,KMT5A,NCAPD3
GO:BP	protein localization to chromosome, centromeric region	GO:0071459	2.9774642292727418e-9	8.526153447350737	25	413	10	18123	HASPIN,CENPA,CDK1,AURKB,NDC80,TTK,KNL1,BUB1B,ZWILCH,CDT1
GO:BP	DNA geometric change	GO:0032392	3.6889316753904046e-9	8.4330993884912	114	413	18	18123	MCM8,TOP2A,ERCC6L,HMGA1,RAD51,BRIP1,DSCC1,HMGB2,POLQ,MCM2,MCM3,MCM5,RFC2,RFC3,RAD54L,MCM4,MCM6,RFC4
GO:BP	positive regulation of cell cycle phase transition	GO:1901989	3.6889316753904046e-9	8.4330993884912	114	413	18	18123	CDK1,CHEK2,CDC25C,CCNB1,UBE2C,DTL,CDCA5,ESPL1,CDC6,CCND1,NSMCE2,DLGAP5,CDC25A,CDT1,FBXO5,EZH2,CDC25B,CDC7
GO:BP	positive regulation of mitotic cell cycle phase transition	GO:1901992	6.4953930568822634e-9	8.18739456325607	90	413	16	18123	CDK1,CDC25C,CCNB1,UBE2C,DTL,CDCA5,ESPL1,CDC6,CCND1,NSMCE2,DLGAP5,CDC25A,CDT1,FBXO5,CDC25B,CDC7
GO:BP	chromosome condensation	GO:0030261	9.436965213046366e-9	8.02516764586381	67	413	14	18123	CDK1,NCAPH,NUSAP1,TOP2A,CCNB1,PLK1,SMC4,NCAPG,CDCA5,NCAPD2,NCAPG2,KMT5A,NCAPD3,INCENP
GO:BP	sister chromatid cohesion	GO:0007062	1.010206721538533e-8	7.995589746180645	56	413	13	18123	HASPIN,SGO1,PLK1,BUB1,CDCA5,ESCO2,ESPL1,CDC20,SGO2,BUB1B,DSCC1,NSMCE2,FEN1
GO:BP	regulation of DNA replication	GO:0006275	1.2507868107728054e-8	7.902816706929257	108	413	17	18123	CDK1,CCNA2,ESCO2,PCNA,CDC6,TIMELESS,DSCC1,RFC2,RFC3,E2F7,BRCA2,CDT1,FBXO5,DBF4,SMARCAL1,CDC7,RFC4
GO:BP	mitotic DNA replication	GO:1902969	1.3150434132902262e-8	7.881059909652422	15	413	8	18123	RAD51,CDC45,MCM2,MCM3,BRCA2,GINS1,MCM4,MCM6
GO:BP	DNA duplex unwinding	GO:0032508	1.4298543612132165e-8	7.844708195641605	109	413	17	18123	MCM8,TOP2A,ERCC6L,HMGA1,RAD51,BRIP1,DSCC1,POLQ,MCM2,MCM3,MCM5,RFC2,RFC3,RAD54L,MCM4,MCM6,RFC4
GO:BP	heterocycle metabolic process	GO:0046483	1.4684545700121989e-8	7.83313948482263	5929	413	195	18123	ZNF367,MCM8,PTTG1,CDK2,CDK1,FOXM1,POLA2,CKS2,TGFB1I1,BIRC5,CHEK2,ORC1,AURKB,SFRP2,FANCD2,FANCC,TOP2A,CHAF1A,CHEK1,CCNB1,MCM10,CCNA2,PLK1,DTL,CDCA5,MYBL2,TRIP13,ESCO2,MGME1,CENPF,PIM1,RIOK1,HMGA1,SNRPB,RAD51AP1,RAD51,ATAD2,EXO1,BRIP1,ZPR1,PCNA,RRM2,ALDOC,PARPBP,E2F2,PRIM2,CDC45,CBFB,FANCI,GEMIN6,SLC26A2,TK1,CDC6,TIMELESS,CAV1,KPNA2,POLR1H,MLX,CCND1,SF3B3,KLF10,DSCC1,REXO5,RFWD3,NEK2,TONSL,HMGB2,PO…
GO:BP	cellular aromatic compound metabolic process	GO:0006725	1.5375434971323283e-8	7.813172589180293	5973	413	196	18123	ZNF367,MCM8,PTTG1,CDK2,CDK1,FOXM1,POLA2,CKS2,TGFB1I1,BIRC5,CHEK2,ORC1,AURKB,SFRP2,FANCD2,FANCC,TOP2A,CHAF1A,CHEK1,CCNB1,MCM10,CCNA2,PLK1,DTL,CDCA5,MYBL2,TRIP13,ESCO2,MGME1,CENPF,PIM1,RIOK1,HMGA1,SNRPB,RAD51AP1,RAD51,ATAD2,EXO1,BRIP1,ZPR1,PCNA,RRM2,ALDOC,PARPBP,E2F2,PRIM2,CDC45,CBFB,PON1,FANCI,GEMIN6,SLC26A2,TK1,CDC6,TIMELESS,CAV1,KPNA2,POLR1H,MLX,CCND1,SF3B3,KLF10,DSCC1,REXO5,RFWD3,NEK2,TONSL,HMG…
GO:BP	cytokinesis	GO:0000910	1.6870769492372588e-8	7.772865108361089	174	413	21	18123	AURKA,CENPA,CEP55,KIF14,KIF20A,PRC1,NUSAP1,AURKB,KIF4A,PLK1,ESPL1,KIF23,ECT2,KIF20B,CDC6,RACGAP1,E2F7,CKAP2,BRCA2,CDC25B,INCENP
GO:BP	response to radiation	GO:0009314	1.895828033873056e-8	7.722201059048114	463	413	35	18123	CHEK2,AURKB,SFRP2,FANCD2,CHEK1,DTL,RAD51AP1,RAD51,PBK,PCNA,ECT2,CCND1,IKBIP,RFWD3,PPM1D,RAD18,PCLAF,BRCA1,CDC25A,KDM4D,BRCA2,RAD54L,POLH,BBC3,N4BP1,XRCC2,FEN1,ANGPT2,ITGB1,MSH6,SLC7A11,POLD3,TRIAP1,INTS7,BAX
GO:BP	nucleosome assembly	GO:0006334	1.919507345239574e-8	7.716810221660193	142	413	19	18123	ASF1B,CENPA,HJURP,CENPK,CHAF1A,OIP5,CENPM,CENPN,KNL1,CENPH,CENPL,HMGB2,MCM2,CENPW,MIS18A,DAXX,CENPI,CENPP,H2BC15
GO:BP	histone exchange	GO:0043486	1.9850896367238334e-8	7.702219877890483	71	413	14	18123	CENPA,HJURP,CENPK,OIP5,CENPM,CENPN,KNL1,CENPH,CENPL,CENPW,MIS18A,DAXX,CENPI,CENPP
GO:BP	negative regulation of G1/S transition of mitotic cell cycle	GO:2000134	2.0787349336825783e-8	7.682200885453594	127	413	18	18123	AURKA,WEE1,CDK2,CDK1,GTSE1,CHEK2,CDC25C,CCNB1,PCNA,CCND1,RFWD3,CNOT1,E2F7,E2F1,EZH2,TRIAP1,CDKN2C,BAX
GO:BP	chromatin assembly	GO:0031497	2.0954238555678647e-8	7.6787281161269805	194	413	22	18123	ASF1B,CENPA,HJURP,CENPK,CHAF1A,OIP5,HMGA1,CENPM,CENPN,KNL1,CENPH,CENPL,HMGB2,MCM2,CENPW,MIS18A,DAXX,CENPI,DNMT1,CENPP,HELLS,H2BC15
GO:BP	chromatin assembly or disassembly	GO:0006333	3.8873760573708065e-8	7.410343444513794	219	413	23	18123	ASF1B,CENPA,HJURP,CENPK,CHAF1A,OIP5,HMGA1,CENPM,CENPN,KNL1,CENPH,CENPL,HMGB2,MCM2,CENPW,MIS18A,DAXX,CENPI,DNMT1,CENPP,SMARCE1,HELLS,H2BC15
GO:BP	negative regulation of cell cycle G1/S phase transition	GO:1902807	4.377301585140855e-8	7.358793530551518	133	413	18	18123	AURKA,WEE1,CDK2,CDK1,GTSE1,CHEK2,CDC25C,CCNB1,PCNA,CCND1,RFWD3,CNOT1,E2F7,E2F1,EZH2,TRIAP1,CDKN2C,BAX
GO:BP	chromatin organization	GO:0006325	4.657049667913924e-8	7.33188913024723	839	413	49	18123	AURKA,HASPIN,ASF1B,CENPA,CDK2,CDK1,HJURP,AURKB,CENPK,CHAF1A,CHEK1,CCNB1,CCNA2,OIP5,MKI67,HMGA1,ATAD2,CENPM,CENPN,CDC45,KNL1,CENPH,CENPL,HMGB2,PPM1D,SREBF1,MCM2,CDCA4,CENPW,MIS18A,DAXX,DEK,LOXL2,BRCA1,CENPI,KDM4D,DNMT1,BRCA2,EZH2,KMT5A,CENPP,SMARCE1,HELLS,FAM47E,BCOR,INCENP,H2BC15,CBX8,HMGN4
GO:BP	positive regulation of mitotic cell cycle	GO:0045931	4.6608847981296456e-8	7.331531631277864	118	413	17	18123	CDK1,CDC25C,CCNB1,UBE2C,DTL,CDCA5,ESPL1,CDC6,CCND1,NSMCE2,DLGAP5,CDC25A,BRCA2,CDT1,FBXO5,CDC25B,CDC7
GO:BP	regulation of DNA metabolic process	GO:0051052	5.06149966098071e-8	7.295720787904512	389	413	31	18123	FOXM1,AURKB,CHEK1,RAD51AP1,RAD51,PCNA,PARPBP,TIMELESS,KPNA2,DSCC1,NEK2,POLQ,RFC2,MIS18A,DAXX,DEK,RFC3,BRCA1,KDM4D,FANCB,CDT1,POLH,CCT6A,NIBAN2,MSH6,PINX1,EXOSC3,RFC4,CBX8,BAX,POLR2D
GO:BP	regulation of cytokinesis	GO:0032465	5.4029302874086e-8	7.267370636012365	90	413	15	18123	AURKA,KIF14,KIF20A,PRC1,AURKB,PLK1,KIF23,ECT2,KIF20B,CDC6,RACGAP1,E2F7,BRCA2,CDC25B,INCENP
GO:BP	telomere maintenance	GO:0000723	5.715279713706568e-8	7.242962509774986	169	413	20	18123	CDK2,POLA2,AURKB,RAD51,EXO1,PCNA,PRIM2,DSCC1,NEK2,RFC2,NSMCE2,RFC3,BRCA2,CCT6A,FEN1,SMARCAL1,PINX1,RFC4,POLD3,PRIM1
GO:BP	nucleosome organization	GO:0034728	6.442374171265703e-8	7.190954055083403	188	413	21	18123	ASF1B,CENPA,HJURP,CENPK,CHAF1A,OIP5,HMGA1,CENPM,CENPN,KNL1,CENPH,CENPL,HMGB2,MCM2,CENPW,MIS18A,DAXX,CENPI,CENPP,SMARCE1,H2BC15
GO:BP	meiotic chromosome segregation	GO:0045132	7.268846723921552e-8	7.138534488889002	92	413	15	18123	NUF2,PTTG1,SGO1,FANCD2,TOP2A,PLK1,SMC4,BUB1,TRIP13,ESPL1,TTK,BRIP1,SGO2,BUB1B,EME1
GO:BP	kinetochore assembly	GO:0051382	7.37484909116886e-8	7.132246862067519	18	413	8	18123	CENPA,CENPK,CENPF,CENPN,CENPH,CENPE,CENPW,DLGAP5
GO:BP	regulation of transcription involved in G1/S transition of mitotic cell cycle	GO:0000083	8.199122609394104e-8	7.086232619114552	34	413	10	18123	ORC1,ZPR1,PCNA,RRM2,CDC45,CDC6,E2F7,CDT1,E2F1,FBXO5
GO:BP	organic cyclic compound metabolic process	GO:1901360	9.905652380025211e-8	7.004116916822553	6227	413	199	18123	ZNF367,MCM8,PTTG1,CDK2,CDK1,FOXM1,POLA2,CKS2,TGFB1I1,BIRC5,CHEK2,ORC1,AURKB,SFRP2,FANCD2,FANCC,TOP2A,CHAF1A,CHEK1,CCNB1,MCM10,CCNA2,PLK1,DTL,CDCA5,MYBL2,TRIP13,ESCO2,MGME1,CENPF,PIM1,RIOK1,HMGA1,SNRPB,RAD51AP1,RAD51,ATAD2,EXO1,BRIP1,ZPR1,PCNA,RRM2,ALDOC,PARPBP,E2F2,PRIM2,CDC45,CBFB,PON1,FANCI,GEMIN6,SLC26A2,TK1,CDC6,TIMELESS,CAV1,KPNA2,POLR1H,MLX,CCND1,SF3B3,KLF10,DSCC1,REXO5,RFWD3,NEK2,TONSL,HMG…
GO:BP	telomere maintenance via semi-conservative replication	GO:0032201	1.1103111709638728e-7	6.954555290678281	35	413	10	18123	POLA2,PCNA,PRIM2,DSCC1,RFC2,RFC3,FEN1,RFC4,POLD3,PRIM1
GO:BP	DNA damage response, signal transduction by p53 class mediator	GO:0030330	1.1538008187721376e-7	6.9378691571891995	110	413	16	18123	AURKA,CDK1,FOXM1,GTSE1,CHEK2,CDC25C,CCNB1,PCNA,PPM1D,CNOT1,E2F7,BRCA2,E2F1,KMT5A,TRIAP1,BAX
GO:BP	protein localization to condensed chromosome	GO:1903083	1.1939500166311205e-7	6.923013854074041	19	413	8	18123	HASPIN,CDK1,AURKB,NDC80,TTK,KNL1,ZWILCH,CDT1
GO:BP	DNA strand elongation involved in DNA replication	GO:0006271	1.1939500166311205e-7	6.923013854074041	19	413	8	18123	PCNA,MCM3,RFC3,GINS1,MCM4,RFC4,POLD3,GINS2
GO:BP	protein localization to kinetochore	GO:0034501	1.1939500166311205e-7	6.923013854074041	19	413	8	18123	HASPIN,CDK1,AURKB,NDC80,TTK,KNL1,ZWILCH,CDT1
GO:BP	DNA damage response, signal transduction by p53 class mediator resulting in cell cycle arrest	GO:0006977	1.3481726874631832e-7	6.870254475449844	57	413	12	18123	AURKA,CDK1,GTSE1,CHEK2,CDC25C,CCNB1,PCNA,CNOT1,E2F7,E2F1,TRIAP1,BAX
GO:BP	positive regulation of G2/M transition of mitotic cell cycle	GO:0010971	1.4156924572358655e-7	6.8490310818383335	27	413	9	18123	CDK1,CDC25C,CCNB1,DTL,CCND1,CDC25A,FBXO5,CDC25B,CDC7
GO:BP	regulation of G1/S transition of mitotic cell cycle	GO:2000045	1.5891807006244786e-7	6.7988267177566115	180	413	20	18123	AURKA,WEE1,CDK2,CDK1,KIF14,GTSE1,CHEK2,CDC25C,CCNB1,PCNA,CDC6,CCND1,RFWD3,CNOT1,E2F7,E2F1,EZH2,TRIAP1,CDKN2C,BAX
GO:BP	telomere organization	GO:0032200	2.103715692475979e-7	6.67701295345931	183	413	20	18123	CDK2,POLA2,AURKB,RAD51,EXO1,PCNA,PRIM2,DSCC1,NEK2,RFC2,NSMCE2,RFC3,BRCA2,CCT6A,FEN1,SMARCAL1,PINX1,RFC4,POLD3,PRIM1
GO:BP	ATP-dependent chromatin remodeling	GO:0043044	2.897010671267891e-7	6.538049905050217	102	413	15	18123	CENPA,HJURP,CENPK,OIP5,CENPM,CENPN,KNL1,CENPH,CENPL,CENPW,MIS18A,DAXX,CENPI,CENPP,SMARCE1
GO:BP	regulation of response to DNA damage stimulus	GO:2001020	2.9382111303328917e-7	6.531917000430008	225	413	22	18123	DDIAS,FOXM1,CHEK2,SFRP2,CHEK1,WDR76,RAD51AP1,RAD51,PCNA,PARPBP,TIMELESS,RFWD3,POLQ,DEK,BRCA1,KDM4D,FANCB,FBXO5,KMT5A,POLH,TRIAP1,CBX8
GO:BP	mitotic cytokinesis	GO:0000281	3.0488157153334165e-7	6.515868825628898	74	413	13	18123	CENPA,CEP55,KIF20A,NUSAP1,KIF4A,PLK1,ESPL1,KIF23,ECT2,KIF20B,RACGAP1,CKAP2,INCENP
GO:BP	positive regulation of cell cycle G2/M phase transition	GO:1902751	3.922049602785291e-7	6.406486918042097	30	413	9	18123	CDK1,CDC25C,CCNB1,DTL,CCND1,CDC25A,FBXO5,CDC25B,CDC7
GO:BP	negative regulation of organelle organization	GO:0010639	5.03385023015227e-7	6.298099709960884	361	413	28	18123	PTTG1,TPX2,AURKB,NDC80,TOP2A,CHEK1,CCNB1,PLK1,ZWINT,BUB1,TRIP13,ESPL1,CENPF,TTK,CDC20,BUB1B,MCM2,KNTC1,MAD2L1,PFN1,BRCA1,CKAP2,SSH2,CCNF,CDT1,FBXO5,PINX1,TRIAP1
GO:BP	reproductive process	GO:0022414	5.059214588991714e-7	6.295916899393864	1512	413	69	18123	AURKA,MCM8,ASF1B,NUF2,PTTG1,CDK2,CDK1,CCNB2,SGO1,CKS2,KIFC1,ASPM,SFRP2,FANCD2,FANCC,TOP2A,CDC25C,CCNB1,PLK1,SMC4,BUB1,TRIP13,ESPL1,RAD51AP1,KIF18A,RAD51,TTK,EXO1,BRIP1,NCAPD2,PCNA,CDC20,KNL1,SGO2,CCND1,BUB1B,NEK2,HMGB2,MND1,RACGAP1,EME1,YBX3,CENPI,E2F7,CDC25A,CCNF,BRCA2,E2F1,FBXO5,TEAD4,RAD54L,SDC1,FANCA,NCAPD3,XRCC2,ACVR1,PLAT,CDC25B,ANGPT2,ITGB1,SPOCD1,VMP1,MSH6,ADCYAP1R1,INCENP,HROB,C1QBP,BAX,…
GO:BP	postreplication repair	GO:0006301	5.325697511661761e-7	6.273623504203275	52	413	11	18123	DTL,PCNA,RFC2,RAD18,PCLAF,RFC3,UFD1,BRCA1,POLH,RFC4,POLD3
GO:BP	reproduction	GO:0000003	5.410517294633744e-7	6.266761210408231	1515	413	69	18123	AURKA,MCM8,ASF1B,NUF2,PTTG1,CDK2,CDK1,CCNB2,SGO1,CKS2,KIFC1,ASPM,SFRP2,FANCD2,FANCC,TOP2A,CDC25C,CCNB1,PLK1,SMC4,BUB1,TRIP13,ESPL1,RAD51AP1,KIF18A,RAD51,TTK,EXO1,BRIP1,NCAPD2,PCNA,CDC20,KNL1,SGO2,CCND1,BUB1B,NEK2,HMGB2,MND1,RACGAP1,EME1,YBX3,CENPI,E2F7,CDC25A,CCNF,BRCA2,E2F1,FBXO5,TEAD4,RAD54L,SDC1,FANCA,NCAPD3,XRCC2,ACVR1,PLAT,CDC25B,ANGPT2,ITGB1,SPOCD1,VMP1,MSH6,ADCYAP1R1,INCENP,HROB,C1QBP,BAX,…
GO:BP	organelle assembly	GO:0070925	7.933894467585008e-7	6.100513580576049	921	413	49	18123	AURKA,CENPA,CDK2,CDK1,CCNB2,TPX2,KIFC1,PRC1,CHEK2,KIF11,AURKB,ASPM,KIF4A,CENPK,PLK1,CEP152,MYBL2,CENPF,CEP135,KIF23,CENPN,CDC20,KNL1,CENPH,CENPE,WDR62,NEK2,CENPW,RACGAP1,NIP7,HAUS8,DLGAP5,ABT1,BRCA1,CNOT1,CFAP20,CFAP221,DYNLRB2,FBXO5,SDC1,HAUS1,ITGB1,VMP1,TUBB,INCENP,RCC1,C1QBP,ODF2,KPNB1
GO:BP	DNA biosynthetic process	GO:0071897	9.825149367288573e-7	6.007660838520361	201	413	20	18123	CDK2,AURKB,DTL,CENPF,PCNA,TK1,DSCC1,NEK2,POLQ,RFC2,PCLAF,RFC3,UFD1,POLH,CCT6A,NIBAN2,PINX1,RFC4,POLD3,HROB
GO:BP	chromosome organization involved in meiotic cell cycle	GO:0070192	0.000001207810601871702	5.918001162578198	69	413	12	18123	SGO1,FANCD2,SMC4,BUB1,TRIP13,RAD51,BRIP1,NCAPD2,SGO2,BUB1B,NCAPD3,INCENP
GO:BP	response to ionizing radiation	GO:0010212	0.0000012657525552816837	5.897651187193253	148	413	17	18123	CHEK2,SFRP2,FANCD2,RAD51AP1,RAD51,ECT2,CCND1,IKBIP,RFWD3,BRCA1,KDM4D,BRCA2,RAD54L,BBC3,XRCC2,INTS7,BAX
GO:BP	regulation of cell cycle G1/S phase transition	GO:1902806	0.000001343930311531485	5.87162325070333	205	413	20	18123	AURKA,WEE1,CDK2,CDK1,KIF14,GTSE1,CHEK2,CDC25C,CCNB1,PCNA,CDC6,CCND1,RFWD3,CNOT1,E2F7,E2F1,EZH2,TRIAP1,CDKN2C,BAX
GO:BP	response to UV	GO:0009411	0.0000016867761896622843	5.772942538064612	151	413	17	18123	AURKB,CHEK1,DTL,PBK,PCNA,CCND1,RAD18,PCLAF,CDC25A,BRCA2,POLH,N4BP1,FEN1,MSH6,POLD3,TRIAP1,BAX
GO:BP	cellular component biogenesis	GO:0044085	0.000001826729859182792	5.738325672319406	3377	413	121	18123	AURKA,MCM8,ASF1B,CENPA,CDK2,CDK1,KIF14,CCNB2,TPX2,KIFC1,PRC1,CHEK2,HJURP,KIF11,ORC1,AURKB,ASPM,KIF4A,CENPK,FANCC,CHAF1A,CCNB1,OIP5,MYO1C,PLK1,CEP152,UBE2C,MYBL2,TRIP13,CENPF,RIOK1,CEP135,HMGA1,SNRPB,KIF23,RAD51,EXO1,BRIP1,CENPM,ECT2,RRM2,CENPN,CDC45,CBFB,CDC20,KNL1,CENPH,CENPL,GEMIN6,TK1,CDC6,CAV1,ZYX,CENPE,WDR62,GJC1,NEK2,HMGB2,POLQ,MCM2,CENPW,FBLIM1,MCM3,MCM5,KNTC1,RACGAP1,MIS18A,WDR12,ADGRL4,D…
GO:BP	DNA strand elongation	GO:0022616	0.00000190690985185449	5.719669837508557	26	413	8	18123	PCNA,MCM3,RFC3,GINS1,MCM4,RFC4,POLD3,GINS2
GO:BP	cytoskeleton-dependent cytokinesis	GO:0061640	0.0000020105717753867354	5.6966804184088735	102	413	14	18123	CENPA,CEP55,KIF20A,NUSAP1,AURKB,KIF4A,PLK1,ESPL1,KIF23,ECT2,KIF20B,RACGAP1,CKAP2,INCENP
GO:BP	cellular component assembly	GO:0022607	0.0000025755679226802025	5.589126992451529	3104	413	113	18123	AURKA,MCM8,ASF1B,CENPA,CDK2,CDK1,KIF14,CCNB2,TPX2,KIFC1,PRC1,CHEK2,HJURP,KIF11,ORC1,AURKB,ASPM,KIF4A,CENPK,FANCC,CHAF1A,CCNB1,OIP5,MYO1C,PLK1,CEP152,UBE2C,MYBL2,TRIP13,CENPF,CEP135,HMGA1,SNRPB,KIF23,RAD51,EXO1,BRIP1,CENPM,ECT2,RRM2,CENPN,CDC45,CBFB,CDC20,KNL1,CENPH,CENPL,GEMIN6,TK1,CDC6,CAV1,ZYX,CENPE,WDR62,GJC1,NEK2,HMGB2,POLQ,MCM2,CENPW,FBLIM1,MCM3,MCM5,KNTC1,RACGAP1,MIS18A,ADGRL4,DAXX,DIAPH1,N…
GO:BP	regulation of cell division	GO:0051302	0.000002725180076816953	5.56460479475102	175	413	18	18123	AURKA,KIF14,KIF20A,PRC1,AURKB,ASPM,SFRP2,PLK1,KIF23,ECT2,KIF20B,CDC6,RACGAP1,E2F7,ORC6,BRCA2,CDC25B,INCENP
GO:BP	spindle midzone assembly	GO:0051255	0.000002797339924889075	5.553254756176352	12	413	6	18123	PRC1,AURKB,KIF4A,KIF23,RACGAP1,INCENP
GO:BP	cellular nitrogen compound metabolic process	GO:0034641	0.000003199154470370458	5.494964789609586	6576	413	201	18123	ZNF367,MCM8,PTTG1,CDK2,CDK1,FOXM1,POLA2,CKS2,TGFB1I1,BIRC5,CHEK2,ORC1,AURKB,SFRP2,FANCD2,FANCC,TOP2A,CHAF1A,CHEK1,CCNB1,MCM10,CCNA2,PLK1,DTL,CDCA5,MYBL2,TRIP13,ESCO2,MGME1,CENPF,PIM1,RIOK1,HMGA1,SNRPB,RAD51AP1,RAD51,ATAD2,EXO1,BRIP1,ZPR1,PCNA,RRM2,ALDOC,PARPBP,E2F2,PRIM2,CDC45,CBFB,FANCI,GEMIN6,SLC26A2,TK1,CDC6,TIMELESS,CAV1,DAP3,KPNA2,POLR1H,MLX,CCND1,SF3B3,KLF10,DSCC1,REXO5,RFWD3,NEK2,TONSL,HMG…
GO:BP	histone phosphorylation	GO:0016572	0.000003434100871358241	5.464186952264542	38	413	9	18123	AURKA,HASPIN,CDK2,CDK1,AURKB,CHEK1,CCNB1,CCNA2,INCENP
GO:BP	female meiotic nuclear division	GO:0007143	0.000003508592466703837	5.454867073431855	28	413	8	18123	AURKA,CCNB2,TOP2A,PLK1,TRIP13,TTK,FBXO5,CDC25B
GO:BP	cellular macromolecule metabolic process	GO:0044260	0.000003649970408715762	5.437710656470526	8430	413	244	18123	ZNF367,AURKA,HASPIN,MCM8,PTTG1,WEE1,PKN3,CDK2,CDK1,FOXM1,KIF14,CCNB2,POLA2,TPX2,CKS2,TGFB1I1,BIRC5,CHEK2,MELK,ORC1,AURKB,SFRP2,FANCD2,FANCC,TOP2A,CHAF1A,CHEK1,IQGAP3,PCOLCE,CDC25C,CDCA3,CCNB1,MCM10,CCNA2,GAS1,FKBP7,PLK1,UBE2C,DTL,BUB1,CDCA2,CDCA5,MASTL,MYBL2,TRIP13,ESCO2,MGME1,CENPF,PIM1,RIOK1,HMGA1,SNRPB,RAD51AP1,RAD51,ATAD2,TTK,PBK,EXO1,BRIP1,ZDHHC5,ZPR1,PCNA,ECT2,RRM2,PARPBP,E2F2,PRIM2,CDC45,C…
GO:BP	G2/MI transition of meiotic cell cycle	GO:0008315	0.000006514923986131984	5.186090647118858	4	413	4	18123	CCNB2,CDC25C,CDC25A,CDC25B
GO:BP	pre-replicative complex assembly involved in nuclear cell cycle DNA replication	GO:0006267	0.000007659094663454012	5.115822562730735	8	413	5	18123	MCM2,MCM3,MCM5,MCM4,MCM6
GO:BP	mitotic spindle midzone assembly	GO:0051256	0.000007659094663454012	5.115822562730735	8	413	5	18123	PRC1,AURKB,KIF4A,KIF23,RACGAP1
GO:BP	pre-replicative complex assembly involved in cell cycle DNA replication	GO:1902299	0.000007659094663454012	5.115822562730735	8	413	5	18123	MCM2,MCM3,MCM5,MCM4,MCM6
GO:BP	DNA synthesis involved in DNA repair	GO:0000731	0.000007948584056225934	5.099710228744316	54	413	10	18123	DTL,PCNA,RFC2,PCLAF,RFC3,UFD1,POLH,RFC4,POLD3,HROB
GO:BP	regulation of cyclin-dependent protein serine/threonine kinase activity	GO:0000079	0.000008215456218303854	5.085368314445539	98	413	13	18123	CCNB2,CKS2,CDC25C,CCNB1,CCNA2,PLK1,CDC6,CCND1,CKS1B,CDKN3,CDC25A,CCNF,CDKN2C
GO:BP	regulation of attachment of spindle microtubules to kinetochore	GO:0051988	0.000008223134813397473	5.084962589683115	14	413	6	18123	AURKB,CCNB1,ECT2,NEK2,RACGAP1,KNSTRN
GO:BP	translesion synthesis	GO:0019985	0.000008223134813397473	5.084962589683115	42	413	9	18123	DTL,PCNA,RFC2,PCLAF,RFC3,UFD1,POLH,RFC4,POLD3
GO:BP	regulation of cyclin-dependent protein kinase activity	GO:1904029	0.000012967387315531555	4.887147517265781	102	413	13	18123	CCNB2,CKS2,CDC25C,CCNB1,CCNA2,PLK1,CDC6,CCND1,CKS1B,CDKN3,CDC25A,CCNF,CDKN2C
GO:BP	attachment of mitotic spindle microtubules to kinetochore	GO:0051315	0.000013285036056434772	4.8766372625491945	15	413	6	18123	NUF2,KIF2C,AURKB,NDC80,CENPE,CDT1
GO:BP	nucleic acid phosphodiester bond hydrolysis	GO:0090305	0.00001420627537110633	4.847519771320104	306	413	23	18123	MGME1,EXO1,PCNA,POLR1H,REXO5,HMGB2,POLQ,RFC2,RNASEH2A,ABT1,RFC3,EME1,CNOT1,USB1,NOB1,N4BP1,FEN1,EXOSC3,RFC4,POLD3,BAX,ISG20L2,KPNB1
GO:BP	cellular response to radiation	GO:0071478	0.000014679250133228522	4.833296129114694	197	413	18	18123	CHEK2,AURKB,SFRP2,CHEK1,RAD51AP1,RAD51,PBK,PCNA,ECT2,CDC25A,KDM4D,POLH,BBC3,N4BP1,POLD3,TRIAP1,INTS7,BAX
GO:BP	anaphase-promoting complex-dependent catabolic process	GO:0031145	0.000014679250133228522	4.833296129114694	87	413	12	18123	AURKA,PTTG1,CDK2,CDK1,AURKB,CCNB1,PLK1,UBE2C,CDC20,BUB1B,MAD2L1,FBXO5
GO:BP	regulation of DNA-directed DNA polymerase activity	GO:1900262	0.00001576083078332702	4.80242089375604	9	413	5	18123	PCNA,DSCC1,RFC2,RFC3,RFC4
GO:BP	positive regulation of DNA-directed DNA polymerase activity	GO:1900264	0.00001576083078332702	4.80242089375604	9	413	5	18123	PCNA,DSCC1,RFC2,RFC3,RFC4
GO:BP	female meiosis I	GO:0007144	0.00001576083078332702	4.80242089375604	9	413	5	18123	AURKA,CCNB2,TRIP13,FBXO5,CDC25B
GO:BP	mitotic spindle elongation	GO:0000022	0.00001576083078332702	4.80242089375604	9	413	5	18123	PRC1,AURKB,KIF4A,KIF23,RACGAP1
GO:BP	spindle elongation	GO:0051231	0.00001576083078332702	4.80242089375604	9	413	5	18123	PRC1,AURKB,KIF4A,KIF23,RACGAP1
GO:BP	chromatin remodeling	GO:0006338	0.00001901429822399113	4.720919698812612	222	413	19	18123	CENPA,HJURP,CENPK,OIP5,HMGA1,CENPM,CENPN,KNL1,CENPH,CENPL,CENPW,MIS18A,DAXX,CENPI,KDM4D,DNMT1,CENPP,SMARCE1,HELLS
GO:BP	positive regulation of DNA metabolic process	GO:0051054	0.000019052603711932462	4.720045665633734	201	413	18	18123	FOXM1,AURKB,RAD51AP1,RAD51,PCNA,TIMELESS,DSCC1,NEK2,RFC2,RFC3,BRCA1,KDM4D,FANCB,CCT6A,EXOSC3,RFC4,CBX8,BAX
GO:BP	macromolecule biosynthetic process	GO:0009059	0.000023161692978777908	4.635229699501192	5145	413	162	18123	ZNF367,MCM8,CDK2,CDK1,FOXM1,POLA2,CHST1,CKS2,TGFB1I1,BIRC5,CHEK2,ORC1,AURKB,SFRP2,FANCD2,TOP2A,CHAF1A,CHEK1,CCNB1,MCM10,CCNA2,PLK1,DTL,MYBL2,TRIP13,ESCO2,MGME1,CENPF,PIM1,HMGA1,SNRPB,RAD51,ATAD2,EXO1,BRIP1,ZDHHC5,ZPR1,PCNA,RRM2,E2F2,PRIM2,CDC45,CBFB,TK1,CDC6,TIMELESS,CAV1,DAP3,POLR1H,MLX,CCND1,KLF10,DSCC1,RFWD3,NEK2,TONSL,HMGB2,POLQ,PPM1D,SREBF1,MCM2,CDCA4,MGAT4C,FAM111B,NR2C2AP,MCM3,EIF4A1,MCM5,…
GO:BP	organelle localization	GO:0051640	0.000025458057361686184	4.594174739303283	657	413	36	18123	NUF2,CENPA,CDK1,CDCA8,KIF14,KIFC1,NUSAP1,KIF2C,AURKB,ASPM,NDC80,CCNB1,MYO1C,PLK1,CEP152,CDCA5,ESPL1,CENPF,CEP135,KIF18A,CENPE,NEK2,HAUS8,DLGAP5,MAD2L1,BLOC1S5,CDT1,HAUS1,ITGB1,VMP1,PINX1,TUBB,INCENP,ODF2,RAN,KPNB1
GO:BP	DNA-dependent DNA replication maintenance of fidelity	GO:0045005	0.000025458057361686184	4.594174739303283	48	413	9	18123	RAD51,PCNA,TIMELESS,RFWD3,TONSL,TRAIP,EME1,BRCA2,SMARCAL1
GO:BP	establishment of mitotic spindle localization	GO:0040001	0.000025682070325853037	4.590369969121424	36	413	8	18123	CENPA,NUSAP1,NDC80,PLK1,ESPL1,MAD2L1,ITGB1,KPNB1
GO:BP	DNA replication checkpoint signaling	GO:0000076	0.00002937620021806569	4.532004380467114	17	413	6	18123	ORC1,CDC45,CDC6,TIMELESS,CDT1,CLSPN
GO:BP	meiotic cell cycle phase transition	GO:0044771	0.00002977500846366526	4.526148106395223	10	413	5	18123	CCNB2,CDC25C,TTK,CDC25A,CDC25B
GO:BP	regulation of meiotic cell cycle	GO:0051445	0.000029995646274534553	4.522941776485636	49	413	9	18123	ASPM,CDC25C,TRIP13,RAD51AP1,TTK,CDC20,CDC25A,FBXO5,CDC25B
GO:BP	regulation of DNA repair	GO:0006282	0.0000380979735839893	4.419098123660237	131	413	14	18123	FOXM1,CHEK1,RAD51AP1,RAD51,PCNA,PARPBP,TIMELESS,POLQ,DEK,BRCA1,KDM4D,FANCB,POLH,CBX8
GO:BP	macromolecule metabolic process	GO:0043170	0.00004315231987459734	4.364995851590627	9867	413	271	18123	ZNF367,AURKA,HASPIN,MCM8,PTTG1,WEE1,PKN3,CDK2,CDK1,FOXM1,KIF14,CCNB2,POLA2,TPX2,CHST1,CKS2,TGFB1I1,BIRC5,CHEK2,MELK,ORC1,AURKB,SFRP2,FANCD2,FANCC,TOP2A,CHAF1A,CHEK1,IQGAP3,PCOLCE,CDC25C,CDCA3,CCNB1,MCM10,CCNA2,GAS1,MYO1C,FKBP7,PLK1,UBE2C,DTL,BUB1,CDCA2,CDCA5,MASTL,MYBL2,TRIP13,ESCO2,ESPL1,HMMR,MGME1,CENPF,PIM1,RIOK1,HMGA1,SNRPB,RAD51AP1,RAD51,ATAD2,TTK,PBK,EXO1,BRIP1,ZDHHC5,ZPR1,PCNA,ECT2,RRM2,PA…
GO:BP	cellular macromolecule biosynthetic process	GO:0034645	0.000045387763073743134	4.34306122084096	5081	413	159	18123	ZNF367,MCM8,CDK2,CDK1,FOXM1,POLA2,CKS2,TGFB1I1,BIRC5,CHEK2,ORC1,AURKB,SFRP2,FANCD2,TOP2A,CHAF1A,CHEK1,CCNB1,MCM10,CCNA2,PLK1,DTL,MYBL2,TRIP13,ESCO2,MGME1,CENPF,PIM1,HMGA1,SNRPB,RAD51,ATAD2,EXO1,BRIP1,ZDHHC5,ZPR1,PCNA,RRM2,E2F2,PRIM2,CDC45,CBFB,TK1,CDC6,TIMELESS,CAV1,DAP3,POLR1H,MLX,CCND1,KLF10,DSCC1,RFWD3,NEK2,TONSL,HMGB2,POLQ,PPM1D,SREBF1,MCM2,CDCA4,MGAT4C,FAM111B,NR2C2AP,MCM3,EIF4A1,MCM5,RFC2,N…
GO:BP	replication fork processing	GO:0031297	0.00004761060886563846	4.322296264539012	39	413	8	18123	RAD51,PCNA,RFWD3,TONSL,TRAIP,EME1,BRCA2,SMARCAL1
GO:BP	pre-replicative complex assembly	GO:0036388	0.000048188105036826344	4.317060151686567	66	413	10	18123	MCM8,ORC1,CDC6,MCM2,MCM3,MCM5,ORC6,CDT1,MCM4,MCM6
GO:BP	response to abiotic stimulus	GO:0009628	0.00005743955319636753	4.240788946988367	1264	413	55	18123	TGFB1I1,CHEK2,AURKB,SFRP2,FANCD2,CHEK1,CCNB1,CCNA2,DTL,MLC1,RAD51AP1,RAD51,PBK,BRIP1,PCNA,ECT2,TIMELESS,CAV1,CCND1,IKBIP,RFWD3,PPM1D,DAXX,RAD18,PCLAF,EGLN3,LOXL2,MAP3K1,BRCA1,YBX3,CDC25A,KDM4D,BRCA2,E2F1,KCNK4,RAD54L,POLH,BBC3,NUP188,N4BP1,XRCC2,FEN1,PLAT,ANGPT2,ITGB1,MSH6,SLC7A11,POLD3,TRIAP1,INTS7,PLAU,TTPA,BAX,POLR2D,NUP93
GO:BP	positive regulation of cytokinesis	GO:0032467	0.00005755017093031816	4.239953382130041	40	413	8	18123	KIF14,AURKB,KIF23,ECT2,KIF20B,CDC6,RACGAP1,CDC25B
GO:BP	meiotic chromosome condensation	GO:0010032	0.00007986097966274185	4.097665366574522	6	413	4	18123	SMC4,NCAPD2,NCAPD3,INCENP
GO:BP	regulation of signal transduction by p53 class mediator	GO:1901796	0.00008332859470582635	4.079205942267126	202	413	17	18123	AURKA,CDK2,CDK1,TPX2,CHEK2,AURKB,CHEK1,EXO1,BRIP1,RFC2,DAXX,RFC3,BRCA1,PAK1IP1,KMT5A,RFC4,TRIAP1
GO:BP	spindle localization	GO:0051653	0.00010684940752003243	3.971227881656149	57	413	9	18123	CENPA,NUSAP1,ASPM,NDC80,PLK1,ESPL1,MAD2L1,ITGB1,KPNB1
GO:BP	nitrogen compound metabolic process	GO:0006807	0.00011783896554772706	3.92871107861354	10148	413	275	18123	ZNF367,AURKA,HASPIN,MCM8,PTTG1,WEE1,PKN3,CDK2,CDK1,FOXM1,KIF14,CCNB2,POLA2,TPX2,CHST1,CKS2,TGFB1I1,BIRC5,CHEK2,MELK,ORC1,AURKB,SFRP2,FANCD2,FANCC,TOP2A,CHAF1A,CHEK1,IQGAP3,PCOLCE,CDC25C,CDCA3,CCNB1,MCM10,CCNA2,GAS1,FKBP7,PLK1,UBE2C,DTL,BUB1,CDCA2,CDCA5,MASTL,MYBL2,TRIP13,ESCO2,ESPL1,HMMR,MGME1,CENPF,PIM1,RIOK1,HMGA1,SNRPB,RAD51AP1,RAD51,ATAD2,TTK,PBK,EXO1,BRIP1,ZDHHC5,ZPR1,PCNA,ECT2,RRM2,ALDOC,PA…
GO:BP	reciprocal meiotic recombination	GO:0007131	0.00012232625132106053	3.9124803329843156	58	413	9	18123	FANCD2,TOP2A,TRIP13,RAD51AP1,RAD51,BRIP1,MND1,EME1,RAD54L
GO:BP	reciprocal homologous recombination	GO:0140527	0.00012232625132106053	3.9124803329843156	58	413	9	18123	FANCD2,TOP2A,TRIP13,RAD51AP1,RAD51,BRIP1,MND1,EME1,RAD54L
GO:BP	positive regulation of chromosome segregation	GO:0051984	0.00013369318491488234	3.8738907305786783	13	413	5	18123	AURKB,CCNB1,CDC6,RAD18,CDT1
GO:BP	nuclear membrane organization	GO:0071763	0.00013369318491488234	3.8738907305786783	74	413	10	18123	CDK1,CCNB2,CCNB1,PLK1,NUP188,NEMP1,RCC1,RAN,NUP93,KPNB1
GO:BP	error-free translesion synthesis	GO:0070987	0.0001482455382555088	3.8290183687237103	22	413	6	18123	PCNA,RFC2,RFC3,UFD1,POLH,RFC4
GO:BP	regulation of cell cycle checkpoint	GO:1901976	0.00015499767842012155	3.809674806712814	33	413	7	18123	CHEK2,NDC80,CCNB1,WDR76,RFWD3,MAD2L1,CDT1
GO:BP	homologous recombination	GO:0035825	0.00015962567432497405	3.796897255084853	60	413	9	18123	FANCD2,TOP2A,TRIP13,RAD51AP1,RAD51,BRIP1,MND1,EME1,RAD54L
GO:BP	inner cell mass cell proliferation	GO:0001833	0.0001997381892585367	3.6995388915708847	14	413	5	18123	CHEK1,ZPR1,BRCA2,GINS1,NCAPG2
GO:BP	meiotic spindle organization	GO:0000212	0.0001997381892585367	3.6995388915708847	14	413	5	18123	AURKA,CCNB2,ASPM,ESPL1,FBXO5
GO:BP	regulation of cellular component organization	GO:0051128	0.00021356795109070767	3.6704639188192827	2439	413	87	18123	AURKA,PTTG1,FOXM1,KIF14,TPX2,NUSAP1,HJURP,AURKB,SFRP2,NDC80,TOP2A,CHEK1,IQGAP3,CDC25C,CCNB1,MYO1C,SKA1,PLK1,ZWINT,UBE2C,SKA3,BUB1,CDCA5,MKI67,TRIP13,ESPL1,CENPF,CEP135,HMGA1,RAD51AP1,KIF18A,ATAD2,TTK,ECT2,KIF20B,CDC45,CBFB,CDC20,CDC6,CAV1,CENPE,BUB1B,BORA,TACC3,NEK2,SREBF1,MCM2,FBLIM1,KNTC1,DAXX,DIAPH1,NSMCE2,IQGAP2,DLGAP5,MAD2L1,PFN1,BRCA1,CNOT1,CKAP2,KDM4D,PLSCR3,SSH2,DNMT1,CCNF,CDT1,E2F1,FBXO5…
GO:BP	establishment of organelle localization	GO:0051656	0.000221346126037341	3.654928074567576	443	413	26	18123	NUF2,CENPA,CDCA8,KIF14,KIFC1,NUSAP1,KIF2C,AURKB,NDC80,CCNB1,MYO1C,PLK1,CDCA5,ESPL1,CENPF,KIF18A,CENPE,DLGAP5,MAD2L1,BLOC1S5,CDT1,ITGB1,PINX1,INCENP,RAN,KPNB1
GO:BP	regulation of G2/MI transition of meiotic cell cycle	GO:0110030	0.00022674318980514722	3.6444657480361617	3	413	3	18123	CDC25C,CDC25A,CDC25B
GO:BP	positive regulation of G2/MI transition of meiotic cell cycle	GO:0110032	0.00022674318980514722	3.6444657480361617	3	413	3	18123	CDC25C,CDC25A,CDC25B
GO:BP	spindle assembly involved in female meiosis I	GO:0007057	0.00022674318980514722	3.6444657480361617	3	413	3	18123	AURKA,CCNB2,FBXO5
GO:BP	negative regulation of cellular component organization	GO:0051129	0.00023755198914040494	3.6242413286668564	760	413	37	18123	PTTG1,KIF14,TPX2,AURKB,NDC80,TOP2A,CHEK1,CCNB1,PLK1,ZWINT,BUB1,TRIP13,ESPL1,CENPF,HMGA1,ATAD2,TTK,CDC20,CAV1,BUB1B,MCM2,KNTC1,MAD2L1,PFN1,BRCA1,CKAP2,KDM4D,SSH2,DNMT1,CCNF,CDT1,FBXO5,CORO1C,EFNA1,BCOR,PINX1,TRIAP1
GO:BP	spindle assembly involved in meiosis	GO:0090306	0.00033115484293983865	3.479968889275802	8	413	4	18123	AURKA,CCNB2,ASPM,FBXO5
GO:BP	cellular protein-containing complex assembly	GO:0034622	0.0003359606245420031	3.4737116200691007	1150	413	49	18123	MCM8,ASF1B,CENPA,TPX2,HJURP,ORC1,CENPK,CHAF1A,OIP5,MYO1C,UBE2C,CENPF,SNRPB,RAD51,CENPM,CENPN,CDC45,KNL1,CENPH,CENPL,GEMIN6,CDC6,CENPE,HMGB2,MCM2,CENPW,MCM3,MCM5,MIS18A,DAXX,DIAPH1,IQGAP2,DLGAP5,ABT1,PFN1,CENPI,ORC6,SSH2,CDT1,FBXO5,CENPP,MCM4,MCM6,HELLS,H2BC15,NRG3,CLP1,POLR2D,NUP93
GO:BP	mitotic nuclear membrane reassembly	GO:0007084	0.0003468604400397532	3.459845229279137	51	413	8	18123	CDK1,CCNB2,CCNB1,NUP188,RCC1,RAN,NUP93,KPNB1
GO:BP	mitotic nuclear membrane organization	GO:0101024	0.0003468604400397532	3.459845229279137	51	413	8	18123	CDK1,CCNB2,CCNB1,NUP188,RCC1,RAN,NUP93,KPNB1
GO:BP	primary metabolic process	GO:0044238	0.0003890886312589187	3.4099514586170994	10642	413	283	18123	ZNF367,AURKA,HASPIN,MCM8,PTTG1,WEE1,PKN3,CDK2,CDK1,FOXM1,KIF14,CCNB2,POLA2,TPX2,CHST1,CKS2,TGFB1I1,BIRC5,CHEK2,MELK,ORC1,AURKB,SFRP2,FANCD2,FANCC,TOP2A,CHAF1A,CHEK1,IQGAP3,PCOLCE,CDC25C,CDCA3,CCNB1,MCM10,CCNA2,GAS1,FKBP7,PLK1,UBE2C,DTL,BUB1,CDCA2,CDCA5,MASTL,MYBL2,TRIP13,ESCO2,ESPL1,MGME1,CENPF,PIM1,RIOK1,HMGA1,SNRPB,RAD51AP1,RAD51,ATAD2,TTK,PBK,EXO1,BRIP1,ZDHHC5,ZPR1,PCNA,ECT2,RRM2,ALDOC,PARPBP,…
GO:BP	DNA damage response, detection of DNA damage	GO:0042769	0.00038984289337483494	3.409110378324736	38	413	7	18123	DTL,PCNA,RFC2,RAD18,RFC3,RFC4,POLD3
GO:BP	DNA unwinding involved in DNA replication	GO:0006268	0.0003960716549513874	3.4022262369662704	16	413	5	18123	HMGA1,RAD51,MCM2,MCM4,MCM6
GO:BP	establishment of spindle localization	GO:0051293	0.0003960716549513874	3.4022262369662704	52	413	8	18123	CENPA,NUSAP1,NDC80,PLK1,ESPL1,MAD2L1,ITGB1,KPNB1
GO:BP	protein-containing complex subunit organization	GO:0043933	0.00042100706450760037	3.375710616632439	2017	413	74	18123	MCM8,ASF1B,CENPA,CDK1,KIF14,TPX2,KIF2C,HJURP,ORC1,CENPK,FANCC,CHAF1A,CCNB1,OIP5,MYO1C,UBE2C,CENPF,HMGA1,SNRPB,KIF18A,RAD51,CENPM,ECT2,RRM2,CENPN,CDC45,KNL1,CENPH,CENPL,GEMIN6,TK1,CDC6,CAV1,DAP3,CENPE,HMGB2,POLQ,MCM2,CENPW,FBLIM1,MCM3,MCM5,KNTC1,MIS18A,ADGRL4,DAXX,DIAPH1,IQGAP2,DLGAP5,ABT1,PFN1,CENPI,ORC6,CKAP2,SSH2,CDT1,FBXO5,GLE1,CENPP,SMARCE1,BBC3,MCM4,FANCA,MCM6,HELLS,LIX1,VMP1,H2BC15,NRG3,EIF…
GO:BP	nuclear envelope organization	GO:0006998	0.000426396800228404	3.3701860630067224	85	413	10	18123	CDK1,CCNB2,CCNB1,PLK1,NUP188,NEMP1,RCC1,RAN,NUP93,KPNB1
GO:BP	response to stress	GO:0006950	0.00042705075533998294	3.3695205056444624	4321	413	135	18123	DDIAS,AURKA,MCM8,PTTG1,CDK2,CDK1,FOXM1,CHST1,GTSE1,TGFB1I1,CHEK2,MELK,SFRP2,FANCD2,FANCC,TOP2A,CHAF1A,CHEK1,CDC25C,CCNB1,MCM10,CCNA2,MYO1C,WDR76,DTL,CDCA5,MASTL,MLC1,TRIP13,ESCO2,MGME1,HMGA1,RAD51AP1,RAD51,PBK,EXO1,BRIP1,PCNA,ECT2,PARPBP,CDC45,FANCI,TIMELESS,CAV1,ZYX,VKORC1,KPNA2,CCND1,KLF10,RFWD3,TONSL,HMGB2,POLQ,PPM1D,SREBF1,MCM2,ACOX2,MCM3,MCM5,RFC2,TRAIP,RNASEH2A,DAXX,RAD18,ITGA5,PCLAF,EGLN3,…
GO:BP	regulation of transferase activity	GO:0051338	0.00045808258720938497	3.3390562164592508	1036	413	45	18123	KIF14,CCNB2,TPX2,CKS2,AURKB,SFRP2,IQGAP3,CDC25C,CCNB1,CCNA2,PLK1,UBE2C,PBK,PCNA,ECT2,CDC20,CDC6,CAV1,CCND1,CENPE,DSCC1,BORA,NEK2,CKS1B,CDKN3,RFC2,DAXX,RFC3,MAD2L1,MAP3K1,CDC25A,CCNF,CLSPN,FBXO5,CORO1C,EZH2,DBF4,CDC25B,EFNA1,FLT4,PINX1,INCENP,NRG3,RFC4,CDKN2C
GO:BP	regulation of double-strand break repair	GO:2000779	0.00046726227593994247	3.3304392799909848	86	413	10	18123	FOXM1,CHEK1,RAD51AP1,RAD51,PARPBP,TIMELESS,POLQ,DEK,KDM4D,FANCB
GO:BP	oocyte maturation	GO:0001556	0.0004818499664033036	3.3170881669610113	27	413	6	18123	AURKA,CCNB1,TRIP13,BRCA2,FBXO5,CDC25B
GO:BP	mitotic sister chromatid cohesion	GO:0007064	0.0004818499664033036	3.3170881669610113	27	413	6	18123	HASPIN,SGO1,CDCA5,CDC20,DSCC1,NSMCE2
GO:BP	regulation of cellular response to stress	GO:0080135	0.00048631339193152087	3.313083770814548	727	413	35	18123	DDIAS,FOXM1,CHEK2,SFRP2,CHEK1,WDR76,HMGA1,RAD51AP1,RAD51,PBK,PCNA,PARPBP,TIMELESS,CAV1,RFWD3,POLQ,DEK,BFAR,BRCA1,YBX3,KDM4D,FANCB,FBXO5,KMT5A,POLH,BBC3,NUP188,NONO,FLT4,MANF,SLC7A11,TRIAP1,CBX8,BAX,NUP93
GO:BP	female gamete generation	GO:0007292	0.0005051009968600554	3.2966217743694677	145	413	13	18123	AURKA,MCM8,CCNB2,ASPM,TOP2A,CCNB1,PLK1,TRIP13,TTK,BRCA2,FBXO5,CDC25B,HROB
GO:BP	nuclear membrane reassembly	GO:0031468	0.0005051009968600554	3.2966217743694677	54	413	8	18123	CDK1,CCNB2,CCNB1,NUP188,RCC1,RAN,NUP93,KPNB1
GO:BP	meiosis II cell cycle process	GO:0061983	0.0005365669116344758	3.2703761123901924	9	413	4	18123	SGO1,BUB1,SGO2,BUB1B
GO:BP	meiotic sister chromatid segregation	GO:0045144	0.0005365669116344758	3.2703761123901924	9	413	4	18123	SGO1,BUB1,SGO2,BUB1B
GO:BP	meiosis II	GO:0007135	0.0005365669116344758	3.2703761123901924	9	413	4	18123	SGO1,BUB1,SGO2,BUB1B
GO:BP	meiotic sister chromatid cohesion	GO:0051177	0.0005365669116344758	3.2703761123901924	9	413	4	18123	SGO1,BUB1,SGO2,BUB1B
GO:BP	regulation of meiotic cell cycle phase transition	GO:1901993	0.0005365669116344758	3.2703761123901924	9	413	4	18123	CDC25C,TTK,CDC25A,CDC25B
GO:BP	nucleus organization	GO:0006997	0.0006087758429490994	3.215542589289482	148	413	13	18123	CDK1,CCNB2,CHEK1,CCNB1,PLK1,ZPR1,HMGB2,NUP188,NEMP1,RCC1,RAN,NUP93,KPNB1
GO:BP	negative regulation of G0 to G1 transition	GO:0070317	0.0006087758429490994	3.215542589289482	41	413	7	18123	CHEK1,RAD51,RRM2,BRCA1,E2F1,EZH2,CDC7
GO:BP	cellular response to abiotic stimulus	GO:0071214	0.0006547245231468009	3.183941391981813	340	413	21	18123	CHEK2,AURKB,SFRP2,CHEK1,RAD51AP1,RAD51,PBK,PCNA,ECT2,MAP3K1,YBX3,CDC25A,KDM4D,KCNK4,POLH,BBC3,N4BP1,POLD3,TRIAP1,INTS7,BAX
GO:BP	cellular response to environmental stimulus	GO:0104004	0.0006547245231468009	3.183941391981813	340	413	21	18123	CHEK2,AURKB,SFRP2,CHEK1,RAD51AP1,RAD51,PBK,PCNA,ECT2,MAP3K1,YBX3,CDC25A,KDM4D,KCNK4,POLH,BBC3,N4BP1,POLD3,TRIAP1,INTS7,BAX
GO:BP	cellular response to UV	GO:0034644	0.0006574715175649256	3.182123056575568	90	413	10	18123	AURKB,CHEK1,PBK,PCNA,CDC25A,POLH,N4BP1,POLD3,TRIAP1,BAX
GO:BP	regulation of exit from mitosis	GO:0007096	0.000704839856995521	3.1519095455951565	42	413	7	18123	UBE2C,CDCA5,CDC20,BUB1B,NEK2,KNTC1,MAD2L1
GO:BP	blastocyst development	GO:0001824	0.0007267289620910323	3.1386275316662675	110	413	11	18123	ASF1B,CHEK1,ZPR1,RRM2,NEK2,CNOT1,BRCA2,GINS1,TEAD4,NCAPG2,BCOR
GO:BP	DNA endoreduplication	GO:0042023	0.0007809470814335948	3.107378393805189	4	413	3	18123	ZPR1,E2F7,FBXO5
GO:BP	mitotic chromosome movement towards spindle pole	GO:0007079	0.0007809470814335948	3.107378393805189	4	413	3	18123	CENPE,DLGAP5,KPNB1
GO:BP	meiotic sister chromatid cohesion, centromeric	GO:0051754	0.0007809470814335948	3.107378393805189	4	413	3	18123	BUB1,SGO2,BUB1B
GO:BP	gamete generation	GO:0007276	0.0009206904218787417	3.03588637487485	722	413	34	18123	AURKA,MCM8,ASF1B,PTTG1,CCNB2,KIFC1,ASPM,FANCD2,FANCC,TOP2A,CDC25C,CCNB1,PLK1,TRIP13,KIF18A,TTK,BRIP1,KNL1,HMGB2,RACGAP1,YBX3,BRCA2,E2F1,FBXO5,FANCA,ACVR1,CDC25B,ANGPT2,ITGB1,SPOCD1,ADCYAP1R1,HROB,BAX,ODF2
GO:BP	base-excision repair	GO:0006284	0.0009420591511951674	3.0259218273226804	76	413	9	18123	HMGA1,PCNA,POLQ,RFC2,RFC3,NEIL3,FEN1,RFC4,POLD3
GO:BP	protein localization to chromatin	GO:0071168	0.001025469184363492	2.989077385770478	31	413	6	18123	MCM8,PLK1,CDCA5,ESCO2,EZH2,FAM47E
GO:BP	regulation of DNA recombination	GO:0000018	0.0011092899194172687	2.954954933609206	136	413	12	18123	CHEK1,RAD51AP1,RAD51,PARPBP,TIMELESS,KPNA2,POLQ,DAXX,FANCB,MSH6,EXOSC3,POLR2D
GO:BP	cellular process involved in reproduction in multicellular organism	GO:0022412	0.0011741014089912752	2.930294390768719	382	413	22	18123	AURKA,CCNB2,ASPM,FANCC,TOP2A,CCNB1,PLK1,TRIP13,KIF18A,TTK,BRIP1,KNL1,HMGB2,BRCA2,FBXO5,FANCA,ACVR1,CDC25B,ANGPT2,ITGB1,BAX,ODF2
GO:BP	regulation of G0 to G1 transition	GO:0070316	0.0012468068946348638	2.904200804812268	46	413	7	18123	CHEK1,RAD51,RRM2,BRCA1,E2F1,EZH2,CDC7
GO:BP	centromeric sister chromatid cohesion	GO:0070601	0.0012686953841518967	2.8966426402083227	11	413	4	18123	SGO1,BUB1,SGO2,BUB1B
GO:BP	positive regulation of DNA-dependent DNA replication	GO:2000105	0.0012686953841518967	2.8966426402083227	11	413	4	18123	E2F7,CDT1,DBF4,CDC7
GO:BP	homologous chromosome segregation	GO:0045143	0.0012816528269132498	2.8922296002266794	62	413	8	18123	PTTG1,SGO1,FANCD2,PLK1,TRIP13,ESPL1,BRIP1,SGO2
GO:BP	response to X-ray	GO:0010165	0.0014477313060216987	2.8393120342302214	33	413	6	18123	SFRP2,RAD51,CCND1,IKBIP,BRCA2,XRCC2
GO:BP	error-prone translesion synthesis	GO:0042276	0.001462202887417985	2.8349923628277067	21	413	5	18123	PCNA,RFC2,RFC3,POLH,RFC4
GO:BP	blastocyst growth	GO:0001832	0.001462202887417985	2.8349923628277067	21	413	5	18123	CHEK1,ZPR1,BRCA2,GINS1,NCAPG2
GO:BP	intracellular signal transduction	GO:0035556	0.0015257805510721322	2.8165079253011047	2886	413	95	18123	DDIAS,AURKA,HASPIN,PKN3,CDK2,CDK1,CEP55,FOXM1,KIF14,TPX2,GTSE1,CHEK2,MELK,ORC1,AURKB,SFRP2,FANCD2,NDC80,RASL10A,ARHGAP11A,CHEK1,IQGAP3,CDC25C,CCNB1,CCNA2,WDR76,PLK1,ZWINT,DEPDC1B,BUB1,MASTL,TRIP13,CENPF,TTK,PBK,EXO1,BRIP1,PCNA,ECT2,E2F2,CDC45,CDC20,CDC6,TIMELESS,CAV1,CCND1,BUB1B,ZWILCH,NKIRAS2,RFWD3,PPM1D,RFC2,DEPDC1,KNTC1,RACGAP1,NR3C2,DAXX,RTKN2,RFC3,MAD2L1,UFD1,MAP3K1,EME1,BRCA1,YBX3,CNOT1,E2F…
GO:BP	regulation of double-strand break repair via homologous recombination	GO:0010569	0.0015979126454550626	2.7964469663448064	48	413	7	18123	CHEK1,RAD51AP1,RAD51,PARPBP,TIMELESS,POLQ,FANCB
GO:BP	G0 to G1 transition	GO:0045023	0.0015979126454550626	2.7964469663448064	48	413	7	18123	CHEK1,RAD51,RRM2,BRCA1,E2F1,EZH2,CDC7
GO:BP	organic substance biosynthetic process	GO:1901576	0.0016658975876079481	2.778351700710655	6297	413	180	18123	ZNF367,MCM8,CDK2,CDK1,FOXM1,POLA2,CHST1,CKS2,TGFB1I1,BIRC5,CHEK2,ORC1,AURKB,SFRP2,FANCD2,TOP2A,CHAF1A,CHEK1,CCNB1,MCM10,CCNA2,PLK1,DTL,MYBL2,TRIP13,ESCO2,MGME1,CENPF,PIM1,HMGA1,SNRPB,RAD51,ATAD2,EXO1,BRIP1,ZDHHC5,ZPR1,PCNA,RRM2,ALDOC,E2F2,PRIM2,CDC45,CBFB,SLC26A2,TK1,CDC6,TIMELESS,CAV1,ETNPPL,DAP3,POLR1H,MLX,CCND1,KLF10,DSCC1,RFWD3,NEK2,TONSL,HMGB2,POLQ,PPM1D,SREBF1,MCM2,ACOX2,CDCA4,MGAT4C,FAM111…
GO:BP	mitotic G2/M transition checkpoint	GO:0044818	0.0016829759870741097	2.773922080551572	34	413	6	18123	CDK1,ORC1,CHEK1,CDC6,BRCA1,CLSPN
GO:BP	mitotic nuclear membrane disassembly	GO:0007077	0.0017925730965841426	2.7465231258716654	12	413	4	18123	CDK1,CCNB2,CCNB1,PLK1
GO:BP	positive regulation of meiotic cell cycle phase transition	GO:1901995	0.0017925730965841426	2.7465231258716654	5	413	3	18123	CDC25C,CDC25A,CDC25B
GO:BP	spindle assembly involved in female meiosis	GO:0007056	0.0017925730965841426	2.7465231258716654	5	413	3	18123	AURKA,CCNB2,FBXO5
GO:BP	regulation of sister chromatid cohesion	GO:0007063	0.0017943078241154206	2.7461030491142626	22	413	5	18123	BUB1,CDCA5,ESPL1,NSMCE2,FEN1
GO:BP	protein-containing complex assembly	GO:0065003	0.0017943078241154206	2.7461030491142626	1724	413	63	18123	MCM8,ASF1B,CENPA,CDK1,KIF14,TPX2,HJURP,ORC1,CENPK,FANCC,CHAF1A,CCNB1,OIP5,MYO1C,UBE2C,CENPF,SNRPB,RAD51,CENPM,ECT2,RRM2,CENPN,CDC45,KNL1,CENPH,CENPL,GEMIN6,TK1,CDC6,CENPE,HMGB2,POLQ,MCM2,CENPW,FBLIM1,MCM3,MCM5,KNTC1,MIS18A,ADGRL4,DAXX,DIAPH1,IQGAP2,DLGAP5,ABT1,PFN1,CENPI,ORC6,SSH2,CDT1,FBXO5,CENPP,BBC3,MCM4,FANCA,MCM6,HELLS,H2BC15,NRG3,CLP1,BAX,POLR2D,NUP93
GO:BP	positive regulation of transferase activity	GO:0051347	0.0018761685560904036	2.7267281469316047	690	413	32	18123	KIF14,TPX2,CKS2,AURKB,IQGAP3,CCNB1,PLK1,UBE2C,PBK,PCNA,ECT2,CDC20,CDC6,CCND1,CENPE,DSCC1,BORA,NEK2,CKS1B,RFC2,DAXX,RFC3,MAP3K1,CLSPN,EZH2,DBF4,CDC25B,EFNA1,FLT4,INCENP,NRG3,RFC4
GO:BP	base-excision repair, gap-filling	GO:0006287	0.0019456820242493502	2.7109281334394364	35	413	6	18123	PCNA,RFC2,RFC3,FEN1,RFC4,POLD3
GO:BP	intrinsic apoptotic signaling pathway in response to DNA damage	GO:0008630	0.0020348134073185234	2.691475409479218	104	413	10	18123	DDIAS,CHEK2,SFRP2,BRCA1,BRCA2,E2F1,BBC3,MSH6,TRIAP1,BAX
GO:BP	positive regulation of DNA biosynthetic process	GO:2000573	0.0021123257802641866	2.6752391005037413	67	413	8	18123	AURKB,PCNA,DSCC1,NEK2,RFC2,RFC3,CCT6A,RFC4
GO:BP	nucleobase-containing compound biosynthetic process	GO:0034654	0.0021609581946425696	2.6653536347880515	4202	413	128	18123	ZNF367,CDK2,CDK1,FOXM1,POLA2,CKS2,TGFB1I1,BIRC5,CHEK2,ORC1,AURKB,SFRP2,FANCD2,TOP2A,CHEK1,CCNB1,CCNA2,PLK1,DTL,MYBL2,TRIP13,CENPF,PIM1,HMGA1,SNRPB,ATAD2,BRIP1,ZPR1,PCNA,RRM2,E2F2,PRIM2,CDC45,CBFB,SLC26A2,TK1,CDC6,TIMELESS,CAV1,POLR1H,MLX,CCND1,KLF10,DSCC1,NEK2,HMGB2,POLQ,PPM1D,SREBF1,CDCA4,NR2C2AP,RFC2,NDP,TRAIP,DEPDC1,MLXIP,NR3C2,DAXX,PCLAF,MXD3,EGLN3,DEK,TRIM26,RTKN2,DLGAP5,ABT1,RFC3,UFD1,PMM2,…
GO:BP	nucleotide-excision repair, DNA gap filling	GO:0006297	0.002205376435120084	2.6565172702586555	23	413	5	18123	PCNA,RFC2,RFC3,RFC4,POLD3
GO:BP	intrinsic apoptotic signaling pathway	GO:0097193	0.002593675965492684	2.5860842823725094	297	413	18	18123	DDIAS,CHEK2,MELK,SFRP2,E2F2,CAV1,RTKN2,BRCA1,YBX3,BRCA2,E2F1,BBC3,HELLS,NONO,MSH6,TRIAP1,C1QBP,BAX
GO:BP	biosynthetic process	GO:0009058	0.002593675965492684	2.5860842823725094	6391	413	181	18123	ZNF367,MCM8,CDK2,CDK1,FOXM1,POLA2,CHST1,CKS2,TGFB1I1,BIRC5,CHEK2,ORC1,AURKB,SFRP2,FANCD2,TOP2A,CHAF1A,CHEK1,CCNB1,MCM10,CCNA2,PLK1,DTL,MYBL2,TRIP13,ESCO2,MGME1,CENPF,PIM1,HMGA1,SNRPB,RAD51,ATAD2,EXO1,BRIP1,ZDHHC5,ZPR1,PCNA,RRM2,ALDOC,E2F2,PRIM2,CDC45,CBFB,SLC26A2,TK1,CDC6,TIMELESS,CAV1,ETNPPL,DAP3,POLR1H,MLX,CCND1,KLF10,DSCC1,RFWD3,NEK2,TONSL,HMGB2,POLQ,PPM1D,SREBF1,MCM2,ACOX2,CDCA4,MGAT4C,FAM111…
GO:BP	exit from mitosis	GO:0010458	0.0028745535192677015	2.5414296011226285	53	413	7	18123	UBE2C,CDCA5,CDC20,BUB1B,NEK2,KNTC1,MAD2L1
GO:BP	cytokinetic process	GO:0032506	0.0030421738415324544	2.5168159723142187	38	413	6	18123	CEP55,KIF20A,AURKB,ECT2,KIF20B,RACGAP1
GO:BP	response to light stimulus	GO:0009416	0.003045102408987254	2.5163980971492736	328	413	19	18123	AURKB,CHEK1,DTL,PBK,PCNA,CCND1,RAD18,PCLAF,CDC25A,BRCA2,POLH,N4BP1,FEN1,ITGB1,MSH6,SLC7A11,POLD3,TRIAP1,BAX
GO:BP	organic substance metabolic process	GO:0071704	0.003045102408987254	2.5163980971492736	11397	413	294	18123	ZNF367,AURKA,HASPIN,MCM8,PTTG1,WEE1,PKN3,CDK2,CDK1,FOXM1,KIF14,CCNB2,POLA2,TPX2,CHST1,CKS2,TGFB1I1,BIRC5,CHEK2,MELK,ORC1,AURKB,SFRP2,FANCD2,FANCC,TOP2A,CHAF1A,CHEK1,IQGAP3,PCOLCE,CDC25C,CDCA3,CCNB1,MCM10,CCNA2,GAS1,MYO1C,FKBP7,PLK1,UBE2C,DTL,BUB1,CDCA2,CDCA5,MASTL,MYBL2,TRIP13,ESCO2,ESPL1,HMMR,MGME1,CENPF,PIM1,RIOK1,HMGA1,SNRPB,RAD51AP1,RAD51,ATAD2,TTK,PBK,EXO1,BRIP1,ZDHHC5,ZPR1,PCNA,ECT2,RRM2,AL…
GO:BP	cellular response to ionizing radiation	GO:0071479	0.0030906414818571864	2.5099513706990932	71	413	8	18123	CHEK2,SFRP2,RAD51AP1,RAD51,ECT2,KDM4D,BBC3,INTS7
GO:BP	positive regulation of mitotic sister chromatid separation	GO:1901970	0.0032539065370095	2.4875949255982923	14	413	4	18123	ESPL1,NSMCE2,DLGAP5,CDT1
GO:BP	organic cyclic compound biosynthetic process	GO:1901362	0.0032539065370095	2.4875949255982923	4446	413	133	18123	ZNF367,CDK2,CDK1,FOXM1,POLA2,CKS2,TGFB1I1,BIRC5,CHEK2,ORC1,AURKB,SFRP2,FANCD2,TOP2A,CHEK1,CCNB1,CCNA2,PLK1,DTL,MYBL2,TRIP13,CENPF,PIM1,HMGA1,SNRPB,ATAD2,BRIP1,ZPR1,PCNA,RRM2,E2F2,PRIM2,CDC45,CBFB,SLC26A2,TK1,CDC6,TIMELESS,CAV1,POLR1H,MLX,CCND1,KLF10,DSCC1,NEK2,HMGB2,POLQ,PPM1D,SREBF1,ACOX2,CDCA4,NR2C2AP,RFC2,NDP,TRAIP,DEPDC1,MLXIP,NR3C2,DAXX,PCLAF,MXD3,EGLN3,DEK,TRIM26,RTKN2,DLGAP5,ABT1,RFC3,UFD1…
GO:BP	positive regulation of mitotic metaphase/anaphase transition	GO:0045842	0.0032539065370095	2.4875949255982923	14	413	4	18123	ESPL1,NSMCE2,DLGAP5,CDT1
GO:BP	cell cycle DNA replication initiation	GO:1902292	0.0032539065370095	2.4875949255982923	6	413	3	18123	MCM2,MCM3,MCM4
GO:BP	mitotic DNA replication initiation	GO:1902975	0.0032539065370095	2.4875949255982923	6	413	3	18123	MCM2,MCM3,MCM4
GO:BP	nuclear cell cycle DNA replication initiation	GO:1902315	0.0032539065370095	2.4875949255982923	6	413	3	18123	MCM2,MCM3,MCM4
GO:BP	centriole-centriole cohesion	GO:0010457	0.0032539065370095	2.4875949255982923	14	413	4	18123	SGO1,CEP135,NEK2,ODF2
GO:BP	aromatic compound biosynthetic process	GO:0019438	0.0032539065370095	2.4875949255982923	4285	413	129	18123	ZNF367,CDK2,CDK1,FOXM1,POLA2,CKS2,TGFB1I1,BIRC5,CHEK2,ORC1,AURKB,SFRP2,FANCD2,TOP2A,CHEK1,CCNB1,CCNA2,PLK1,DTL,MYBL2,TRIP13,CENPF,PIM1,HMGA1,SNRPB,ATAD2,BRIP1,ZPR1,PCNA,RRM2,E2F2,PRIM2,CDC45,CBFB,SLC26A2,TK1,CDC6,TIMELESS,CAV1,POLR1H,MLX,CCND1,KLF10,DSCC1,NEK2,HMGB2,POLQ,PPM1D,SREBF1,CDCA4,NR2C2AP,RFC2,NDP,TRAIP,DEPDC1,MLXIP,NR3C2,DAXX,PCLAF,MXD3,EGLN3,DEK,TRIM26,RTKN2,DLGAP5,ABT1,RFC3,UFD1,PMM2,…
GO:BP	mitotic centrosome separation	GO:0007100	0.0032539065370095	2.4875949255982923	14	413	4	18123	AURKA,KIF11,CHEK1,NEK2
GO:BP	centrosome duplication	GO:0051298	0.003302027843250006	2.4812192690142143	72	413	8	18123	CDK2,NDC80,CEP152,CEP135,WDR62,BRCA1,CCNF,BRCA2
GO:BP	membrane assembly	GO:0071709	0.0033115843946763712	2.479964172619143	91	413	9	18123	CDK1,CCNB2,CCNB1,CAV1,NUP188,RCC1,RAN,NUP93,KPNB1
GO:BP	positive regulation of DNA replication	GO:0045740	0.003362112559072663	2.473387751049476	39	413	6	18123	CDK1,PCNA,E2F7,CDT1,DBF4,CDC7
GO:BP	regulation of DNA biosynthetic process	GO:2000278	0.0034874786166390667	2.4574884465725764	112	413	10	18123	AURKB,PCNA,DSCC1,NEK2,RFC2,RFC3,CCT6A,NIBAN2,PINX1,RFC4
GO:BP	positive regulation of DNA repair	GO:0045739	0.003947269569394644	2.403703213482139	74	413	8	18123	FOXM1,RAD51AP1,PCNA,TIMELESS,BRCA1,KDM4D,FANCB,CBX8
GO:BP	regulation of mitotic spindle checkpoint	GO:1903504	0.004196555252851828	2.3771070544880404	15	413	4	18123	NDC80,CCNB1,MAD2L1,CDT1
GO:BP	positive regulation of metaphase/anaphase transition of cell cycle	GO:1902101	0.004196555252851828	2.3771070544880404	15	413	4	18123	ESPL1,NSMCE2,DLGAP5,CDT1
GO:BP	centrosome separation	GO:0051299	0.004196555252851828	2.3771070544880404	15	413	4	18123	AURKA,KIF11,CHEK1,NEK2
GO:BP	regulation of spindle checkpoint	GO:0090231	0.004196555252851828	2.3771070544880404	15	413	4	18123	NDC80,CCNB1,MAD2L1,CDT1
GO:BP	regulation of mitotic cell cycle spindle assembly checkpoint	GO:0090266	0.004196555252851828	2.3771070544880404	15	413	4	18123	NDC80,CCNB1,MAD2L1,CDT1
GO:BP	positive regulation of nuclear division	GO:0051785	0.004227416490991689	2.373924962762678	57	413	7	18123	AURKA,NUSAP1,ESPL1,RAD51AP1,NSMCE2,DLGAP5,CDT1
GO:BP	heterocycle biosynthetic process	GO:0018130	0.004239589362808132	2.372676206167385	4275	413	128	18123	ZNF367,CDK2,CDK1,FOXM1,POLA2,CKS2,TGFB1I1,BIRC5,CHEK2,ORC1,AURKB,SFRP2,FANCD2,TOP2A,CHEK1,CCNB1,CCNA2,PLK1,DTL,MYBL2,TRIP13,CENPF,PIM1,HMGA1,SNRPB,ATAD2,BRIP1,ZPR1,PCNA,RRM2,E2F2,PRIM2,CDC45,CBFB,SLC26A2,TK1,CDC6,TIMELESS,CAV1,POLR1H,MLX,CCND1,KLF10,DSCC1,NEK2,HMGB2,POLQ,PPM1D,SREBF1,CDCA4,NR2C2AP,RFC2,NDP,TRAIP,DEPDC1,MLXIP,NR3C2,DAXX,PCLAF,MXD3,EGLN3,DEK,TRIM26,RTKN2,DLGAP5,ABT1,RFC3,UFD1,PMM2,…
GO:BP	multi-organism process	GO:0051704	0.004294984862919613	2.367038362440904	1155	413	45	18123	AURKA,MCM8,ASF1B,PTTG1,CDK1,CCNB2,KIFC1,ASPM,FANCD2,FANCC,TOP2A,CDC25C,CCNB1,PLK1,TRIP13,KIF18A,TTK,BRIP1,KNL1,CAV1,KPNA2,HMGB2,RACGAP1,YBX3,BRCA2,E2F1,FBXO5,TEAD4,NUP188,FANCA,ACVR1,PLAT,CDC25B,ANGPT2,ITGB1,SPOCD1,VMP1,ADCYAP1R1,HROB,C1QBP,BAX,ODF2,RAN,NUP93,KPNB1
GO:BP	cellular metabolic process	GO:0044237	0.004385364816485868	2.357994272036515	10941	413	283	18123	ZNF367,AURKA,HASPIN,MCM8,PTTG1,WEE1,PKN3,CDK2,CDK1,FOXM1,KIF14,CCNB2,POLA2,TPX2,CHST1,CKS2,TGFB1I1,BIRC5,CHEK2,MELK,ORC1,AURKB,SFRP2,FANCD2,FANCC,TOP2A,CHAF1A,CHEK1,IQGAP3,PCOLCE,CDC25C,CDCA3,CCNB1,MCM10,CCNA2,GAS1,FKBP7,PLK1,UBE2C,DTL,BUB1,CDCA2,CDCA5,MASTL,MYBL2,TRIP13,ESCO2,MGME1,CENPF,PIM1,RIOK1,HMGA1,SNRPB,RAD51AP1,RAD51,ATAD2,TTK,PBK,EXO1,BRIP1,ZDHHC5,ZPR1,PCNA,ECT2,RRM2,ALDOC,PARPBP,E2F2,P…
GO:BP	ciliary basal body-plasma membrane docking	GO:0097711	0.004404761214657294	2.3560776300368502	95	413	9	18123	CDK1,PLK1,CEP152,CEP135,NEK2,HAUS8,HAUS1,TUBB,ODF2
GO:BP	positive regulation of gene expression, epigenetic	GO:0045815	0.0046442017725352785	2.33308892011454	58	413	7	18123	CHEK1,MYO1C,HMGA1,ATAD2,POLR1H,CDCA4,DEK
GO:BP	DNA methylation	GO:0006306	0.004992941380803581	2.3016435327117604	77	413	8	18123	PPM1D,MIS18A,BRCA1,DNMT1,EZH2,HELLS,NIBAN2,SPOCD1
GO:BP	DNA alkylation	GO:0006305	0.004992941380803581	2.3016435327117604	77	413	8	18123	PPM1D,MIS18A,BRCA1,DNMT1,EZH2,HELLS,NIBAN2,SPOCD1
GO:BP	membrane biogenesis	GO:0044091	0.005086936886749935	2.2935436505947653	97	413	9	18123	CDK1,CCNB2,CCNB1,CAV1,NUP188,RCC1,RAN,NUP93,KPNB1
GO:BP	cell population proliferation	GO:0008283	0.005216459364609472	2.2826241713538216	2057	413	70	18123	SHCBP1,CDK2,CDK1,FOXM1,KIF14,CKS2,TGFB1I1,PRC1,BIRC5,MELK,AURKB,ASPM,SFRP2,CHEK1,IQGAP3,CDC25C,CCNB1,MCM10,CCNA2,BUB1,MKI67,PIM1,HMGA1,TTK,BRIP1,ZPR1,KIF20B,CDC20,CDC6,CAV1,CCND1,KLF10,TACC3,HMGB2,HPSE2,PPM1D,CDKN3,C18ORF54,RACGAP1,EGLN3,RTKN2,LOXL2,E2F7,CDC25A,E2F3,DNMT1,PAK1IP1,BRCA2,GINS1,E2F1,FBXO5,NCAPG2,BTG3,EZH2,FANCA,HELLS,CDC25B,NIBAN2,ITGB1,FLT4,CDC7,PINX1,JAG1,SLC7A11,EIF5A,CBX8,CDKN2C…
GO:BP	chromosome movement towards spindle pole	GO:0051305	0.005216459364609472	2.2826241713538216	7	413	3	18123	CENPE,DLGAP5,KPNB1
GO:BP	regulation of ubiquitin protein ligase activity	GO:1904666	0.005216459364609472	2.2826241713538216	28	413	5	18123	PLK1,UBE2C,CDC20,MAD2L1,FBXO5
GO:BP	DNA replication, synthesis of RNA primer	GO:0006269	0.005216459364609472	2.2826241713538216	7	413	3	18123	POLA2,PRIM2,PRIM1
GO:BP	pyrimidine nucleoside biosynthetic process	GO:0046134	0.005224404492423863	2.281963205770689	16	413	4	18123	TK1,UPP2,UCK2,DTYMK
GO:BP	nuclear membrane disassembly	GO:0051081	0.005224404492423863	2.281963205770689	16	413	4	18123	CDK1,CCNB2,CCNB1,PLK1
GO:BP	membrane disassembly	GO:0030397	0.005224404492423863	2.281963205770689	16	413	4	18123	CDK1,CCNB2,CCNB1,PLK1
GO:BP	CD40 signaling pathway	GO:0023035	0.005224404492423863	2.281963205770689	16	413	4	18123	FANCD2,ITGA5,FANCA,ITGB1
GO:BP	positive regulation of mitotic nuclear division	GO:0045840	0.005397985547366942	2.267768282563346	43	413	6	18123	AURKA,NUSAP1,ESPL1,NSMCE2,DLGAP5,CDT1
GO:BP	negative regulation of G2/M transition of mitotic cell cycle	GO:0010972	0.005750057466121033	2.2403278149461	99	413	9	18123	AURKA,CDK1,ORC1,AURKB,CHEK1,CDC6,BRCA1,CLSPN,PINX1
GO:BP	cellular biosynthetic process	GO:0044249	0.006230900068625459	2.2054492139181727	6210	413	174	18123	ZNF367,MCM8,CDK2,CDK1,FOXM1,POLA2,CHST1,CKS2,TGFB1I1,BIRC5,CHEK2,ORC1,AURKB,SFRP2,FANCD2,TOP2A,CHAF1A,CHEK1,CCNB1,MCM10,CCNA2,PLK1,DTL,MYBL2,TRIP13,ESCO2,MGME1,CENPF,PIM1,HMGA1,SNRPB,RAD51,ATAD2,EXO1,BRIP1,ZDHHC5,ZPR1,PCNA,RRM2,E2F2,PRIM2,CDC45,CBFB,SLC26A2,TK1,CDC6,TIMELESS,CAV1,ETNPPL,DAP3,POLR1H,MLX,CCND1,KLF10,DSCC1,RFWD3,NEK2,TONSL,HMGB2,POLQ,PPM1D,SREBF1,MCM2,ACOX2,CDCA4,MGAT4C,FAM111B,NR2C…
GO:BP	regulation of mammary gland epithelial cell proliferation	GO:0033599	0.006576202752186835	2.182024805443901	17	413	4	18123	IQGAP3,CCND1,BRCA2,BAX
GO:BP	positive regulation of chromosome separation	GO:1905820	0.006576202752186835	2.182024805443901	17	413	4	18123	ESPL1,NSMCE2,DLGAP5,CDT1
GO:BP	negative regulation of cell cycle G2/M phase transition	GO:1902750	0.006576202752186835	2.182024805443901	101	413	9	18123	AURKA,CDK1,ORC1,AURKB,CHEK1,CDC6,BRCA1,CLSPN,PINX1
GO:BP	negative regulation of DNA-dependent DNA replication	GO:2000104	0.006576202752186835	2.182024805443901	17	413	4	18123	TIMELESS,BRCA2,FBXO5,SMARCAL1
GO:BP	lateral attachment of mitotic spindle microtubules to kinetochore	GO:0099607	0.006720748070840252	2.17258238394672	2	413	2	18123	AURKB,CENPE
GO:BP	mitotic recombination-dependent replication fork processing	GO:1990426	0.006720748070840252	2.17258238394672	2	413	2	18123	RAD51,BRCA2
GO:BP	endocardial cushion cell differentiation	GO:0061443	0.006720748070840252	2.17258238394672	2	413	2	18123	ACVR1,JAG1
GO:BP	mitotic DNA replication maintenance of fidelity	GO:1990505	0.006720748070840252	2.17258238394672	2	413	2	18123	RAD51,BRCA2
GO:BP	cell cycle DNA replication maintenance of fidelity	GO:1902298	0.006720748070840252	2.17258238394672	2	413	2	18123	RAD51,BRCA2
GO:BP	positive regulation of nitrogen compound metabolic process	GO:0051173	0.006750217658786462	2.1706822232451426	3143	413	98	18123	AURKA,FOXM1,KIF14,TPX2,CKS2,TGFB1I1,CHEK2,AURKB,SFRP2,TOP2A,CHEK1,IQGAP3,PCOLCE,CCNB1,CCNA2,PLK1,UBE2C,DTL,CDCA2,MYBL2,PIM1,RIOK1,HMGA1,RAD51AP1,RAD51,ATAD2,TTK,PBK,ZPR1,PCNA,ECT2,E2F2,CBFB,CDC20,FANCI,CDC6,TIMELESS,CAV1,MLX,CCND1,CENPE,KLF10,DSCC1,BORA,NEK2,CKS1B,HMGB2,SREBF1,CDCA4,RFC2,NDP,MLXIP,DAXX,ITGA5,EGLN3,DLGAP5,ABT1,RFC3,MAP3K1,BRCA1,YBX3,CNOT1,E2F7,CKAP2,KDM4D,E2F3,DNMT1,FANCB,NFIL3,BR…
GO:BP	positive regulation of cyclin-dependent protein serine/threonine kinase activity	GO:0045737	0.006872172978118576	2.162905917497984	30	413	5	18123	CKS2,CCNB1,CDC6,CCND1,CKS1B
GO:BP	establishment of mitotic spindle orientation	GO:0000132	0.006872172978118576	2.162905917497984	30	413	5	18123	CENPA,NDC80,PLK1,MAD2L1,ITGB1
GO:BP	nuclear transport	GO:0051169	0.007194882151278564	2.142976315204593	356	413	19	18123	CDK1,GTSE1,HMGA1,SNRPB,ZPR1,ECT2,GEMIN6,KPNA2,E2F3,DDX19B,GLE1,NUP188,DDX39A,NXT1,EIF5A,POLR2D,RAN,NUP93,KPNB1
GO:BP	regulation of reproductive process	GO:2000241	0.007244232966339169	2.1400075917140393	171	413	12	18123	AURKA,ASPM,CDC25C,TRIP13,RAD51AP1,TTK,CDC20,CDC25A,FBXO5,PLAT,CDC25B,C1QBP
GO:BP	sexual reproduction	GO:0019953	0.007653072660484524	2.1161641633335972	887	413	36	18123	AURKA,MCM8,ASF1B,PTTG1,CDK1,CCNB2,KIFC1,ASPM,FANCD2,FANCC,TOP2A,CDC25C,CCNB1,PLK1,TRIP13,KIF18A,TTK,BRIP1,KNL1,HMGB2,RACGAP1,YBX3,BRCA2,E2F1,FBXO5,FANCA,ACVR1,PLAT,CDC25B,ANGPT2,ITGB1,SPOCD1,ADCYAP1R1,HROB,BAX,ODF2
GO:BP	negative regulation of response to DNA damage stimulus	GO:2001021	0.007674860333676701	2.1149295190254236	83	413	8	18123	DDIAS,CHEK2,SFRP2,PARPBP,POLQ,FANCB,FBXO5,TRIAP1
GO:BP	negative regulation of cell division	GO:0051782	0.008008144939428516	2.0964680751610585	18	413	4	18123	AURKB,ASPM,E2F7,ORC6
GO:BP	multicellular organismal reproductive process	GO:0048609	0.008256020974214883	2.0832292124011884	858	413	35	18123	AURKA,MCM8,ASF1B,PTTG1,CCNB2,KIFC1,ASPM,FANCD2,FANCC,TOP2A,CDC25C,CCNB1,PLK1,TRIP13,KIF18A,TTK,BRIP1,PCNA,KNL1,HMGB2,RACGAP1,YBX3,BRCA2,E2F1,FBXO5,FANCA,ACVR1,CDC25B,ANGPT2,ITGB1,SPOCD1,ADCYAP1R1,HROB,BAX,ODF2
GO:BP	oocyte development	GO:0048599	0.008302487236557307	2.0807917833714913	47	413	6	18123	AURKA,CCNB1,TRIP13,BRCA2,FBXO5,CDC25B
GO:BP	import into nucleus	GO:0051170	0.008319058253735906	2.0799258345692295	174	413	12	18123	CDK1,SNRPB,ZPR1,ECT2,GEMIN6,KPNA2,E2F3,NUP188,NXT1,RAN,NUP93,KPNB1
GO:BP	nucleotide-excision repair	GO:0006289	0.00955085257805847	2.0199578584247133	107	413	9	18123	FANCC,BRIP1,PCNA,RFC2,RFC3,BRCA2,RFC4,POLD3,POLR2D
GO:BP	positive regulation of catalytic activity	GO:0043085	0.009833014613433215	2.0073133154062957	1383	413	50	18123	NCAPH,KIF14,TPX2,CKS2,AURKB,SFRP2,ARHGAP11A,IQGAP3,PCOLCE,CCNB1,PLK1,DEPDC1B,UBE2C,PBK,PCNA,ECT2,CDC20,CDC6,CAV1,CCND1,CENPE,DSCC1,BORA,NEK2,CKS1B,HMGB2,RFC2,DEPDC1,RACGAP1,DAXX,EGLN3,IQGAP2,RFC3,MAP3K1,ORAI1,CLSPN,CORO1C,EZH2,DBF4,BBC3,CDC25B,EFNA1,ITGB1,MSH6,FLT4,ADCYAP1R1,INCENP,NRG3,RFC4,BAX
GO:BP	retrograde vesicle-mediated transport, Golgi to endoplasmic reticulum	GO:0006890	0.01031014859560345	1.986735075377438	87	413	8	18123	KIF2C,KIF11,KIF4A,KIF23,KIF18A,CENPE,RACGAP1,KIF15
GO:BP	regulation of gene expression, epigenetic	GO:0040029	0.010945173099354938	1.9607773656172731	205	413	13	18123	CHEK1,MYO1C,HMGA1,ATAD2,CDC45,POLR1H,PPM1D,CDCA4,DEK,BRCA1,DNMT1,EZH2,HELLS
GO:BP	regulation of mitotic centrosome separation	GO:0046602	0.011003194631648944	1.9584812048900315	9	413	3	18123	KIF11,CHEK1,NEK2
GO:BP	replication fork protection	GO:0048478	0.011003194631648944	1.9584812048900315	9	413	3	18123	TIMELESS,BRCA2,SMARCAL1
GO:BP	positive regulation of cell division	GO:0051781	0.011003194631648944	1.9584812048900315	88	413	8	18123	KIF14,AURKB,KIF23,ECT2,KIF20B,CDC6,RACGAP1,CDC25B
GO:BP	positive regulation of cyclin-dependent protein kinase activity	GO:1904031	0.011828357095106838	1.9270755727075186	34	413	5	18123	CKS2,CCNB1,CDC6,CCND1,CKS1B
GO:BP	RNA phosphodiester bond hydrolysis	GO:0090501	0.011828357095106838	1.9270755727075186	157	413	11	18123	EXO1,POLR1H,RNASEH2A,ABT1,CNOT1,USB1,NOB1,N4BP1,FEN1,EXOSC3,ISG20L2
GO:BP	mismatch repair	GO:0006298	0.011828357095106838	1.9270755727075186	34	413	5	18123	EXO1,PCNA,RNASEH2A,MSH6,POLD3
GO:BP	negative regulation of DNA replication	GO:0008156	0.011828357095106838	1.9270755727075186	34	413	5	18123	CDC6,TIMELESS,BRCA2,FBXO5,SMARCAL1
GO:BP	multicellular organism reproduction	GO:0032504	0.01191053098059297	1.9240688769050274	878	413	35	18123	AURKA,MCM8,ASF1B,PTTG1,CCNB2,KIFC1,ASPM,FANCD2,FANCC,TOP2A,CDC25C,CCNB1,PLK1,TRIP13,KIF18A,TTK,BRIP1,PCNA,KNL1,HMGB2,RACGAP1,YBX3,BRCA2,E2F1,FBXO5,FANCA,ACVR1,CDC25B,ANGPT2,ITGB1,SPOCD1,ADCYAP1R1,HROB,BAX,ODF2
GO:BP	oocyte differentiation	GO:0009994	0.012426247431380277	1.90566000296713	51	413	6	18123	AURKA,CCNB1,TRIP13,BRCA2,FBXO5,CDC25B
GO:BP	regulation of nitrogen compound metabolic process	GO:0051171	0.012683066768737969	1.8967757212411438	5886	413	164	18123	ZNF367,AURKA,PTTG1,CDK1,FOXM1,KIF14,CCNB2,TPX2,CKS2,TGFB1I1,BIRC5,CHEK2,ORC1,AURKB,SFRP2,FANCD2,TOP2A,CHEK1,IQGAP3,PCOLCE,CDC25C,CCNB1,CCNA2,GAS1,PLK1,UBE2C,DTL,CDCA2,MASTL,MYBL2,CENPF,PIM1,RIOK1,HMGA1,RAD51AP1,RAD51,ATAD2,TTK,PBK,BRIP1,ZPR1,PCNA,ECT2,RRM2,PARPBP,E2F2,CDC45,CBFB,CDC20,FANCI,CDC6,TIMELESS,CAV1,KPNA2,MLX,CCND1,SF3B3,CENPE,KLF10,DSCC1,BORA,NEK2,CKS1B,HMGB2,POLQ,PPM1D,SREBF1,CDCA4,CD…
GO:BP	cellular response to light stimulus	GO:0071482	0.012859189466889843	1.890786404751669	135	413	10	18123	AURKB,CHEK1,PBK,PCNA,CDC25A,POLH,N4BP1,POLD3,TRIAP1,BAX
GO:BP	positive regulation of protein localization to nucleus	GO:1900182	0.013356255050507571	1.8743152962685776	91	413	8	18123	CDK1,GTSE1,PLK1,ZPR1,ECT2,CCT6A,PINX1,RAN
GO:BP	anoikis	GO:0043276	0.013356255050507571	1.8743152962685776	35	413	5	18123	CHEK2,CAV1,ITGA5,E2F1,ITGB1
GO:BP	neuronal stem cell population maintenance	GO:0097150	0.014031504251529641	1.8528957678084546	21	413	4	18123	ASPM,FANCD2,FANCC,JAG1
GO:BP	regulation of primary metabolic process	GO:0080090	0.01443835577859062	1.8404822608482787	6071	413	168	18123	ZNF367,AURKA,PTTG1,CDK1,FOXM1,KIF14,CCNB2,TPX2,CKS2,TGFB1I1,BIRC5,CHEK2,ORC1,AURKB,SFRP2,FANCD2,TOP2A,CHEK1,IQGAP3,PCOLCE,CDC25C,CCNB1,CCNA2,GAS1,PLK1,UBE2C,DTL,CDCA2,MASTL,MYBL2,CENPF,PIM1,RIOK1,HMGA1,RAD51AP1,RAD51,ATAD2,TTK,PBK,BRIP1,ZPR1,PCNA,ECT2,RRM2,PARPBP,E2F2,CDC45,CBFB,CDC20,FANCI,CDC6,TIMELESS,CAV1,KPNA2,MLX,CCND1,SF3B3,CENPE,KLF10,DSCC1,BORA,NEK2,CKS1B,HMGB2,POLQ,PPM1D,SREBF1,CDCA4,CD…
GO:BP	positive regulation of molecular function	GO:0044093	0.014520657751403064	1.8380137106789756	1774	413	60	18123	NCAPH,KIF14,TPX2,CKS2,AURKB,SFRP2,ARHGAP11A,IQGAP3,PCOLCE,CCNB1,PLK1,DEPDC1B,UBE2C,PBK,PCNA,ECT2,CDC20,PON1,CDC6,CAV1,CCND1,CENPE,DSCC1,BORA,NEK2,CKS1B,HMGB2,RFC2,DEPDC1,RACGAP1,DAXX,EGLN3,TRIM26,IQGAP2,RTKN2,RFC3,PFN1,MAP3K1,KDM4D,ORAI1,CDT1,CLSPN,CORO1C,EZH2,DBF4,BBC3,CDC25B,NIBAN2,EFNA1,ITGB1,VMP1,MSH6,FLT4,ADCYAP1R1,PINX1,INCENP,NRG3,RFC4,BAX,RAN
GO:BP	positive regulation of cellular metabolic process	GO:0031325	0.014732599557423674	1.8317206154224521	3342	413	101	18123	AURKA,CDK1,FOXM1,KIF14,TPX2,CKS2,TGFB1I1,CHEK2,AURKB,SFRP2,TOP2A,CHEK1,IQGAP3,PCOLCE,CCNB1,CCNA2,PLK1,UBE2C,CDCA2,MYBL2,PIM1,RIOK1,HMGA1,RAD51AP1,RAD51,ATAD2,TTK,PBK,ZPR1,PCNA,ECT2,E2F2,CBFB,CDC20,FANCI,CDC6,TIMELESS,CAV1,MLX,CCND1,CENPE,KLF10,DSCC1,BORA,NEK2,CKS1B,HMGB2,SREBF1,CDCA4,RFC2,NDP,MLXIP,DAXX,ITGA5,EGLN3,DLGAP5,ABT1,RFC3,MAP3K1,BRCA1,YBX3,CNOT1,E2F7,CKAP2,KDM4D,E2F3,DNMT1,FANCB,NFIL3,B…
GO:BP	mitotic DNA replication checkpoint signaling	GO:0033314	0.014821503561910272	1.829107737279861	10	413	3	18123	ORC1,CDC6,CLSPN
GO:BP	histone-serine phosphorylation	GO:0035404	0.014821503561910272	1.829107737279861	10	413	3	18123	AURKA,AURKB,CCNB1
GO:BP	regulation of mitotic spindle organization	GO:0060236	0.014926948015853808	1.826028979640479	36	413	5	18123	TPX2,PLK1,BORA,TACC3,RCC1
GO:BP	nucleocytoplasmic transport	GO:0006913	0.015366136406780256	1.8134353158538348	353	413	18	18123	CDK1,GTSE1,SNRPB,ZPR1,ECT2,GEMIN6,KPNA2,E2F3,DDX19B,GLE1,NUP188,DDX39A,NXT1,EIF5A,POLR2D,RAN,NUP93,KPNB1
GO:BP	protein phosphorylation	GO:0006468	0.016162757586422504	1.791484540690329	1673	413	57	18123	AURKA,HASPIN,WEE1,PKN3,CDK2,CDK1,KIF14,CCNB2,TPX2,CKS2,BIRC5,CHEK2,MELK,AURKB,SFRP2,CHEK1,IQGAP3,CDC25C,CCNB1,CCNA2,PLK1,BUB1,MASTL,PIM1,RIOK1,RAD51,TTK,PBK,ECT2,CDC6,CAV1,CCND1,CENPE,BUB1B,BORA,NEK2,CKS1B,CDKN3,DAXX,ITGA5,MAP3K1,CDC25A,KDM4D,CCNF,CLSPN,CORO1C,EZH2,DBF4,ACVR1,CDC25B,EFNA1,FLT4,CDC7,INCENP,NRG3,CDKN2C,BAX
GO:BP	microtubule-based movement	GO:0007018	0.016588444747815574	1.7801943294128633	385	413	19	18123	KIF14,KIF20A,KIFC1,KIF2C,KIF11,KIF4A,KIF23,KIF18A,KIF20B,CENPE,RACGAP1,DLGAP5,CFAP20,BLOC1S5,CFAP221,DYNLRB2,KIF15,KIF6,KPNB1
GO:BP	establishment of spindle orientation	GO:0051294	0.016727395610401465	1.7765716717141464	37	413	5	18123	CENPA,NDC80,PLK1,MAD2L1,ITGB1
GO:BP	nucleotide-excision repair, DNA incision, 5'-to lesion	GO:0006296	0.016727395610401465	1.7765716717141464	37	413	5	18123	PCNA,RFC2,RFC3,RFC4,POLD3
GO:BP	regulation of cytokinetic process	GO:0032954	0.017547238744463955	1.7557912149469397	3	413	2	18123	ECT2,KIF20B
GO:BP	regulation of DNA endoreduplication	GO:0032875	0.017547238744463955	1.7557912149469397	3	413	2	18123	E2F7,FBXO5
GO:BP	negative regulation of DNA duplex unwinding	GO:1905463	0.017547238744463955	1.7557912149469397	3	413	2	18123	TOP2A,MCM2
GO:BP	negative regulation of transcription involved in G1/S transition of mitotic cell cycle	GO:0071930	0.017547238744463955	1.7557912149469397	3	413	2	18123	E2F7,E2F1
GO:BP	post-translational protein acetylation	GO:0034421	0.017547238744463955	1.7557912149469397	3	413	2	18123	ESCO2,DSCC1
GO:BP	DNA replication preinitiation complex assembly	GO:0071163	0.017547238744463955	1.7557912149469397	3	413	2	18123	CDC45,CDT1
GO:BP	response to gamma radiation	GO:0010332	0.017547238744463955	1.7557912149469397	55	413	6	18123	CHEK2,FANCD2,RAD51,BRCA2,XRCC2,BAX
GO:BP	regulation of microtubule-based process	GO:0032886	0.017629129746750613	1.7537691259033141	245	413	14	18123	AURKA,TPX2,SKA1,PLK1,SKA3,KIF18A,BORA,TACC3,DIAPH1,BRCA1,CKAP2,CFAP20,CCNF,RCC1
GO:BP	positive regulation of chromosome organization	GO:2001252	0.017707212174422393	1.7518498088025378	192	413	12	18123	AURKB,CCNB1,NEK2,SREBF1,DAXX,NSMCE2,BRCA1,DNMT1,CDT1,CCT6A,FAM47E,FEN1
GO:BP	male gonad development	GO:0008584	0.018699139634840135	1.7281783753050655	143	413	10	18123	ASPM,SFRP2,KIF18A,BRIP1,CCND1,HMGB2,YBX3,SDC1,FANCA,BAX
GO:BP	cellular process	GO:0009987	0.018773651956270006	1.726451237757715	17186	413	404	18123	ZNF367,DDIAS,AURKA,HASPIN,MCM8,ASF1B,NUF2,PTTG1,TP53I3,CENPA,WEE1,PKN3,SHCBP1,CDK2,CDK1,NCAPH,CDCA8,CEP55,FOXM1,KIF14,CCNB2,POLA2,KIF20A,TPX2,CHST1,DSN1,SGO1,CKS2,GTSE1,KIFC1,TGFB1I1,PRC1,PIMREG,NUSAP1,KIF2C,BIRC5,CHEK2,HJURP,KIF11,MELK,ORC1,AURKB,ASPM,KIF4A,SFRP2,FANCD2,CENPK,NDC80,FANCC,RASL10A,ARHGAP11A,TOP2A,CHAF1A,ERCC6L,CHEK1,IQGAP3,PCOLCE,TROAP,CDC25C,CDCA3,CCNB1,MCM10,CCNA2,GAS1,OIP5,NTSR…
GO:BP	protein localization to organelle	GO:0033365	0.018773651956270006	1.726451237757715	974	413	37	18123	AURKA,HASPIN,MCM8,CENPA,CDK1,GTSE1,AURKB,NDC80,PLK1,CDCA5,ESCO2,TTK,ZDHHC5,ZPR1,ECT2,KIF20B,KNL1,KPNA2,BUB1B,ZWILCH,SREBF1,DIAPH1,E2F3,BRCA2,CDT1,E2F1,EZH2,BBC3,CCT6A,NUP188,FAM47E,PINX1,NXT1,BAX,RAN,NUP93,KPNB1
GO:BP	positive regulation of meiotic cell cycle	GO:0051446	0.018773651956270006	1.726451237757715	23	413	4	18123	CDC25C,RAD51AP1,CDC25A,CDC25B
GO:BP	negative regulation of histone methylation	GO:0031061	0.018773651956270006	1.726451237757715	23	413	4	18123	BRCA1,KDM4D,DNMT1,BCOR
GO:BP	negative regulation of cellular process	GO:0048523	0.018773651956270006	1.726451237757715	5153	413	145	18123	DDIAS,AURKA,PTTG1,WEE1,CDK2,CDK1,FOXM1,KIF14,TPX2,GTSE1,TGFB1I1,BIRC5,CHEK2,ORC1,AURKB,ASPM,SFRP2,FANCD2,NDC80,TOP2A,CHEK1,CDC25C,CCNB1,GAS1,WDR76,PLK1,ZWINT,BUB1,MASTL,TRIP13,ESPL1,CENPF,PIM1,HMGA1,RAD51,ATAD2,TTK,PBK,BRIP1,ZPR1,PCNA,RRM2,PARPBP,CDC45,CBFB,CDC20,KNL1,CDC6,TIMELESS,CAV1,MLX,CCND1,BUB1B,KLF10,ZWILCH,RFWD3,NEK2,HMGB2,POLQ,PPM1D,SREBF1,MCM2,CDKN3,TRAIP,DEPDC1,C18ORF54,KNTC1,DAAM2,A2…
GO:BP	antigen processing and presentation of exogenous peptide antigen via MHC class II	GO:0019886	0.01881801073598134	1.7254262880313893	97	413	8	18123	KIF2C,KIF11,KIF4A,KIF23,KIF18A,CENPE,RACGAP1,KIF15
GO:BP	pyrimidine nucleoside salvage	GO:0043097	0.018877701965296232	1.7240508746849148	11	413	3	18123	TK1,UPP2,UCK2
GO:BP	pyrimidine-containing compound salvage	GO:0008655	0.018877701965296232	1.7240508746849148	11	413	3	18123	TK1,UPP2,UCK2
GO:BP	development of primary male sexual characteristics	GO:0046546	0.01927083206239572	1.715099533278866	144	413	10	18123	ASPM,SFRP2,KIF18A,BRIP1,CCND1,HMGB2,YBX3,SDC1,FANCA,BAX
GO:BP	RNA localization	GO:0006403	0.01992341173744364	1.700636289814266	222	413	13	18123	MYO1C,SIDT1,DDX19B,GLE1,CCT6A,NUP188,DDX39A,NXT1,EXOSC3,EIF5A,POLR2D,RAN,NUP93
GO:BP	regulation of chromatin organization	GO:1902275	0.01992341173744364	1.700636289814266	222	413	13	18123	CHEK1,CCNB1,MKI67,HMGA1,ATAD2,CDC45,SREBF1,DAXX,BRCA1,KDM4D,DNMT1,FAM47E,BCOR
GO:BP	germ cell development	GO:0007281	0.01992341173744364	1.700636289814266	277	413	15	18123	AURKA,ASPM,FANCC,CCNB1,TRIP13,BRIP1,KNL1,HMGB2,BRCA2,FBXO5,ACVR1,CDC25B,ANGPT2,BAX,ODF2
GO:BP	cellular response to stimulus	GO:0051716	0.01992341173744364	1.700636289814266	7873	413	209	18123	DDIAS,AURKA,HASPIN,MCM8,PTTG1,PKN3,SHCBP1,CDK2,CDK1,CEP55,FOXM1,KIF14,TPX2,GTSE1,TGFB1I1,BIRC5,CHEK2,MELK,ORC1,AURKB,ASPM,SFRP2,FANCD2,NDC80,FANCC,RASL10A,ARHGAP11A,TOP2A,CHAF1A,CHEK1,IQGAP3,CDC25C,CCNB1,MCM10,CCNA2,GAS1,NTSR2,MYO1C,WDR76,PLK1,ZWINT,DEPDC1B,DTL,BUB1,CDCA5,MASTL,MYBL2,MLC1,TRIP13,ESCO2,MGME1,CENPF,PIM1,HMGA1,RAD51AP1,KIF18A,RAD51,TTK,PBK,EXO1,BRIP1,ZDHHC5,ZPR1,LMNB1,PCNA,ECT2,PARP…
GO:BP	regulation of protein kinase activity	GO:0045859	0.01992341173744364	1.700636289814266	809	413	32	18123	KIF14,CCNB2,TPX2,CKS2,SFRP2,IQGAP3,CDC25C,CCNB1,CCNA2,PLK1,PBK,ECT2,CDC6,CAV1,CCND1,CENPE,BORA,CKS1B,CDKN3,DAXX,MAP3K1,CDC25A,CCNF,CLSPN,CORO1C,EZH2,DBF4,CDC25B,EFNA1,INCENP,NRG3,CDKN2C
GO:BP	nucleotide-excision repair, DNA incision	GO:0033683	0.01997873881102772	1.6994319307596364	39	413	5	18123	PCNA,RFC2,RFC3,RFC4,POLD3
GO:BP	DNA modification	GO:0006304	0.01997873881102772	1.6994319307596364	145	413	10	18123	PPM1D,MIS18A,BRCA1,NEIL3,DNMT1,EZH2,HELLS,NIBAN2,SPOCD1,EXOSC3
GO:BP	anatomical structure homeostasis	GO:0060249	0.02028741945140112	1.6927731914728694	486	413	22	18123	CDK2,POLA2,AURKB,RAD51,EXO1,PCNA,PRIM2,DSCC1,NEK2,RFC2,NSMCE2,RFC3,BRCA2,CCT6A,FEN1,SMARCAL1,ITGB1,PINX1,RFC4,POLD3,PRIM1,BAX
GO:BP	phosphorylation	GO:0016310	0.02111755061648602	1.675356456187144	1996	413	65	18123	AURKA,HASPIN,WEE1,PKN3,CDK2,CDK1,KIF14,CCNB2,TPX2,CKS2,BIRC5,CHEK2,MELK,AURKB,SFRP2,CHEK1,IQGAP3,CDC25C,CCNB1,CCNA2,PLK1,BUB1,MASTL,PIM1,RIOK1,RAD51,TTK,PBK,ECT2,ALDOC,TK1,CDC6,CAV1,CCND1,CENPE,BUB1B,BORA,NEK2,CKS1B,CDKN3,DAXX,ITGA5,MAP3K1,CDC25A,KDM4D,CCNF,CLSPN,UCK2,CORO1C,EZH2,DBF4,NUP188,ACVR1,CDC25B,EFNA1,DTYMK,FLT4,CDC7,INCENP,NRG3,CLP1,CDKN2C,PRXL2C,BAX,NUP93
GO:BP	intrinsic apoptotic signaling pathway by p53 class mediator	GO:0072332	0.02169038580940229	1.6637327230709007	78	413	7	18123	CHEK2,E2F2,BRCA2,E2F1,BBC3,TRIAP1,BAX
GO:BP	regulation of spindle organization	GO:0090224	0.022098733511679215	1.6556326152130798	40	413	5	18123	TPX2,PLK1,BORA,TACC3,RCC1
GO:BP	metabolic process	GO:0008152	0.022098733511679215	1.6556326152130798	11915	413	299	18123	ZNF367,AURKA,HASPIN,MCM8,PTTG1,TP53I3,WEE1,PKN3,CDK2,CDK1,FOXM1,KIF14,CCNB2,POLA2,TPX2,CHST1,CKS2,TGFB1I1,BIRC5,CHEK2,MELK,ORC1,AURKB,SFRP2,FANCD2,FANCC,TOP2A,CHAF1A,CHEK1,IQGAP3,PCOLCE,CDC25C,CDCA3,CCNB1,MCM10,CCNA2,GAS1,MYO1C,FKBP7,PLK1,UBE2C,DTL,BUB1,CDCA2,CDCA5,MASTL,MYBL2,TRIP13,ESCO2,ESPL1,HMMR,MGME1,CENPF,PIM1,RIOK1,HMGA1,SNRPB,RAD51AP1,RAD51,ATAD2,TTK,PBK,EXO1,BRIP1,ZDHHC5,ZPR1,PCNA,ECT2,…
GO:BP	positive regulation of double-strand break repair	GO:2000781	0.022098733511679215	1.6556326152130798	40	413	5	18123	FOXM1,RAD51AP1,TIMELESS,KDM4D,FANCB
GO:BP	animal organ regeneration	GO:0031100	0.023125708540090967	1.635904952195949	79	413	7	18123	AURKA,CDK1,CCNA2,PCNA,CCND1,EZH2,ANGPT2
GO:BP	antigen processing and presentation of peptide antigen via MHC class II	GO:0002495	0.023258817224286216	1.6334123741314936	101	413	8	18123	KIF2C,KIF11,KIF4A,KIF23,KIF18A,CENPE,RACGAP1,KIF15
GO:BP	DNA methylation or demethylation	GO:0044728	0.023258817224286216	1.6334123741314936	101	413	8	18123	PPM1D,MIS18A,BRCA1,DNMT1,EZH2,HELLS,NIBAN2,SPOCD1
GO:BP	somatic hypermutation of immunoglobulin genes	GO:0016446	0.023609171472793906	1.6269192535442034	12	413	3	18123	EXO1,POLQ,MSH6
GO:BP	multi-organism reproductive process	GO:0044703	0.023609171472793906	1.6269192535442034	1060	413	39	18123	AURKA,MCM8,ASF1B,PTTG1,CDK1,CCNB2,KIFC1,ASPM,FANCD2,FANCC,TOP2A,CDC25C,CCNB1,PLK1,TRIP13,KIF18A,TTK,BRIP1,KNL1,HMGB2,RACGAP1,YBX3,BRCA2,E2F1,FBXO5,TEAD4,FANCA,ACVR1,PLAT,CDC25B,ANGPT2,ITGB1,SPOCD1,VMP1,ADCYAP1R1,HROB,C1QBP,BAX,ODF2
GO:BP	negative regulation of histone H3-K9 methylation	GO:0051573	0.023609171472793906	1.6269192535442034	12	413	3	18123	BRCA1,KDM4D,DNMT1
GO:BP	centriole replication	GO:0007099	0.02430796718577117	1.6142513585945966	41	413	5	18123	CDK2,CEP152,CEP135,WDR62,BRCA1
GO:BP	meiotic chromosome separation	GO:0051307	0.024323661260418745	1.613971053349948	25	413	4	18123	TOP2A,ESPL1,TTK,EME1
GO:BP	regulation of anoikis	GO:2000209	0.024323661260418745	1.613971053349948	25	413	4	18123	CHEK2,CAV1,ITGA5,ITGB1
GO:BP	positive regulation of macromolecule metabolic process	GO:0010604	0.02498027791886845	1.6024027341780738	3568	413	105	18123	AURKA,CDK1,FOXM1,KIF14,TPX2,CKS2,TGFB1I1,CHEK2,AURKB,SFRP2,TOP2A,CHEK1,IQGAP3,PCOLCE,CCNB1,CCNA2,MYO1C,PLK1,UBE2C,DTL,CDCA2,MYBL2,PIM1,RIOK1,HMGA1,RAD51AP1,RAD51,ATAD2,TTK,PBK,ZPR1,PCNA,ECT2,E2F2,CBFB,CDC20,FANCI,FRMD8,CDC6,TIMELESS,CAV1,POLR1H,MLX,CCND1,CENPE,KLF10,DSCC1,BORA,NEK2,CKS1B,HMGB2,SREBF1,CDCA4,RFC2,NDP,MLXIP,DAXX,ITGA5,EGLN3,DEK,DLGAP5,ABT1,RFC3,MAP3K1,BRCA1,YBX3,CNOT1,E2F7,CKAP2,KDM…
GO:BP	antigen processing and presentation of peptide or polysaccharide antigen via MHC class II	GO:0002504	0.027380933711028912	1.562551746171589	104	413	8	18123	KIF2C,KIF11,KIF4A,KIF23,KIF18A,CENPE,RACGAP1,KIF15
GO:BP	glycosaminoglycan catabolic process	GO:0006027	0.027380933711028912	1.562551746171589	61	413	6	18123	HMMR,HPSE2,HSPG2,SDC1,LYVE1,BGN
GO:BP	regulation of protein modification process	GO:0031399	0.027553049923780493	1.559830320886407	1685	413	56	18123	KIF14,CCNB2,TPX2,CKS2,CHEK2,SFRP2,CHEK1,IQGAP3,CDC25C,CCNB1,CCNA2,PLK1,UBE2C,CDCA2,MASTL,RAD51,TTK,PBK,ECT2,CDC20,FANCI,CDC6,CAV1,CCND1,CENPE,BORA,CKS1B,SREBF1,CDKN3,DAXX,ITGA5,MAD2L1,MAP3K1,BRCA1,CDC25A,KDM4D,DNMT1,CCNF,CLSPN,FBXO5,CORO1C,EZH2,DBF4,N4BP1,FAM47E,ACVR1,CDC25B,EFNA1,BCOR,FLT4,PINX1,SNTA1,INCENP,NRG3,CDKN2C,BAX
GO:BP	positive regulation of organelle organization	GO:0010638	0.028329902730988354	1.547754916600902	630	413	26	18123	AURKA,NUSAP1,AURKB,CCNB1,MYO1C,ESPL1,CEP135,RAD51AP1,NEK2,SREBF1,DAXX,NSMCE2,IQGAP2,DLGAP5,PFN1,BRCA1,CNOT1,DNMT1,CDT1,E2F1,SDC1,BBC3,CCT6A,FAM47E,FEN1,BAX
GO:BP	RNA export from nucleus	GO:0006405	0.029170472399327834	1.535056537667431	129	413	9	18123	DDX19B,GLE1,NUP188,DDX39A,NXT1,EIF5A,POLR2D,RAN,NUP93
GO:BP	positive regulation of ubiquitin protein ligase activity	GO:1904668	0.029170472399327834	1.535056537667431	13	413	3	18123	PLK1,UBE2C,CDC20
GO:BP	chromatin organization involved in regulation of transcription	GO:0034401	0.029170472399327834	1.535056537667431	154	413	10	18123	CHEK1,HMGA1,ATAD2,CDC45,PPM1D,CDCA4,DNMT1,EZH2,HELLS,FAM47E
GO:BP	regulation of nuclear cell cycle DNA replication	GO:0033262	0.029170472399327834	1.535056537667431	13	413	3	18123	CDT1,DBF4,CDC7
GO:BP	in utero embryonic development	GO:0001701	0.029170472399327834	1.535056537667431	379	413	18	18123	ASF1B,CCNB2,CHEK1,CCNB1,ZPR1,RRM2,NEK2,YBX3,CNOT1,E2F7,BRCA2,GINS1,TEAD4,NCAPG2,XRCC2,ACVR1,ITGB1,BCOR
GO:BP	protein import into nucleus	GO:0006606	0.029170472399327834	1.535056537667431	154	413	10	18123	CDK1,ZPR1,ECT2,KPNA2,E2F3,NUP188,NXT1,RAN,NUP93,KPNB1
GO:BP	somatic diversification of immune receptors via somatic mutation	GO:0002566	0.029170472399327834	1.535056537667431	13	413	3	18123	EXO1,POLQ,MSH6
GO:BP	proteasome-mediated ubiquitin-dependent protein catabolic process	GO:0043161	0.030340211746301804	1.517981392569409	442	413	20	18123	AURKA,PTTG1,CDK2,CDK1,KIF14,AURKB,CCNB1,PLK1,UBE2C,PBK,CDC20,CAV1,BUB1B,EDEM2,BFAR,MAD2L1,UFD1,CCNF,FBXO5,N4BP1
GO:BP	ribonucleoprotein complex export from nucleus	GO:0071426	0.030341200044900606	1.5179672461408635	130	413	9	18123	DDX19B,GLE1,NUP188,DDX39A,NXT1,EIF5A,POLR2D,RAN,NUP93
GO:BP	DNA replication, removal of RNA primer	GO:0043137	0.030423070599594936	1.5167969547419076	4	413	2	18123	RNASEH2A,FEN1
GO:BP	Ran protein signal transduction	GO:0031291	0.030423070599594936	1.5167969547419076	4	413	2	18123	RCC1,KPNB1
GO:BP	positive regulation of mitochondrial ATP synthesis coupled electron transport	GO:1905448	0.030423070599594936	1.5167969547419076	4	413	2	18123	CDK1,CCNB1
GO:BP	lens fiber cell apoptotic process	GO:1990086	0.030423070599594936	1.5167969547419076	4	413	2	18123	E2F2,E2F1
GO:BP	positive regulation of protein localization to kinetochore	GO:1905342	0.030423070599594936	1.5167969547419076	4	413	2	18123	NDC80,CDT1
GO:BP	regulation of protein localization to kinetochore	GO:1905340	0.030423070599594936	1.5167969547419076	4	413	2	18123	NDC80,CDT1
GO:BP	Tie signaling pathway	GO:0048014	0.030423070599594936	1.5167969547419076	4	413	2	18123	ANGPT2,SVEP1
GO:BP	ribonucleoprotein complex localization	GO:0071166	0.031386174217951125	1.5032616189062966	131	413	9	18123	DDX19B,GLE1,NUP188,DDX39A,NXT1,EIF5A,POLR2D,RAN,NUP93
GO:BP	nucleic acid transport	GO:0050657	0.032542576224926664	1.4875480692239214	183	413	11	18123	MYO1C,SIDT1,DDX19B,GLE1,NUP188,DDX39A,NXT1,EIF5A,POLR2D,RAN,NUP93
GO:BP	RNA transport	GO:0050658	0.032542576224926664	1.4875480692239214	183	413	11	18123	MYO1C,SIDT1,DDX19B,GLE1,NUP188,DDX39A,NXT1,EIF5A,POLR2D,RAN,NUP93
GO:BP	transport of virus	GO:0046794	0.033235303040312386	1.4784003569639956	64	413	6	18123	CAV1,KPNA2,NUP188,RAN,NUP93,KPNB1
GO:BP	centriole assembly	GO:0098534	0.03457442851239804	1.46124498969915	45	413	5	18123	CDK2,CEP152,CEP135,WDR62,BRCA1
GO:BP	positive regulation of response to DNA damage stimulus	GO:2001022	0.034730260201746424	1.4592919629098153	109	413	8	18123	FOXM1,RAD51AP1,PCNA,TIMELESS,BRCA1,KDM4D,FANCB,CBX8
GO:BP	nucleoside biosynthetic process	GO:0009163	0.034992436964009256	1.4560258110704662	28	413	4	18123	TK1,UPP2,UCK2,DTYMK
GO:BP	mammary gland epithelial cell proliferation	GO:0033598	0.034992436964009256	1.4560258110704662	28	413	4	18123	IQGAP3,CCND1,BRCA2,BAX
GO:BP	positive regulation of double-strand break repair via homologous recombination	GO:1905168	0.03509915847917481	1.454703295848475	14	413	3	18123	RAD51AP1,TIMELESS,FANCB
GO:BP	negative regulation of chromatin organization	GO:1905268	0.0354672249206774	1.4501727909130306	65	413	6	18123	HMGA1,ATAD2,BRCA1,KDM4D,DNMT1,BCOR
GO:BP	establishment of RNA localization	GO:0051236	0.03620243399936311	1.4412622295509099	186	413	11	18123	MYO1C,SIDT1,DDX19B,GLE1,NUP188,DDX39A,NXT1,EIF5A,POLR2D,RAN,NUP93
GO:BP	multi-organism transport	GO:0044766	0.03803756905181201	1.4197872462330219	66	413	6	18123	CAV1,KPNA2,NUP188,RAN,NUP93,KPNB1
GO:BP	multi-organism localization	GO:1902579	0.03803756905181201	1.4197872462330219	66	413	6	18123	CAV1,KPNA2,NUP188,RAN,NUP93,KPNB1
GO:BP	mRNA export from nucleus	GO:0006406	0.0402140533999128	1.3956221497149612	112	413	8	18123	DDX19B,GLE1,NUP188,DDX39A,NXT1,EIF5A,POLR2D,NUP93
GO:BP	mRNA-containing ribonucleoprotein complex export from nucleus	GO:0071427	0.0402140533999128	1.3956221497149612	112	413	8	18123	DDX19B,GLE1,NUP188,DDX39A,NXT1,EIF5A,POLR2D,NUP93
GO:BP	aminoglycan catabolic process	GO:0006026	0.040735409361593616	1.3900279149839285	67	413	6	18123	HMMR,HPSE2,HSPG2,SDC1,LYVE1,BGN
GO:BP	telomere maintenance via recombination	GO:0000722	0.0423247173576173	1.3734059334065527	15	413	3	18123	RAD51,NSMCE2,BRCA2
GO:BP	regulation of IRE1-mediated unfolded protein response	GO:1903894	0.0423247173576173	1.3734059334065527	15	413	3	18123	BFAR,BBC3,BAX
GO:BP	negative regulation of biological process	GO:0048519	0.04238780997245126	1.3727590213050893	5861	413	159	18123	DDIAS,AURKA,PTTG1,WEE1,CDK2,CDK1,FOXM1,KIF14,TPX2,GTSE1,TGFB1I1,BIRC5,CHEK2,ORC1,AURKB,ASPM,SFRP2,FANCD2,NDC80,TOP2A,CHEK1,IQGAP3,CDC25C,CCNB1,GAS1,WDR76,PLK1,ZWINT,BUB1,MASTL,TRIP13,ESPL1,CENPF,PIM1,HMGA1,RAD51,ATAD2,TTK,PBK,BRIP1,ZPR1,PCNA,RRM2,PARPBP,E2F2,CDC45,CBFB,CDC20,KNL1,CDC6,TIMELESS,CAV1,MLX,CCND1,SF3B3,BUB1B,KLF10,ZWILCH,RFWD3,NEK2,HMGB2,POLQ,PPM1D,SREBF1,MCM2,CDKN3,TRAIP,DEPDC1,C18OR…
GO:BP	regulation of nucleobase-containing compound metabolic process	GO:0019219	0.04246272373489817	1.3719921518304656	4123	413	117	18123	ZNF367,CDK1,FOXM1,CKS2,TGFB1I1,BIRC5,CHEK2,ORC1,AURKB,SFRP2,FANCD2,TOP2A,CHEK1,CCNB1,CCNA2,PLK1,MYBL2,CENPF,PIM1,RIOK1,HMGA1,RAD51AP1,RAD51,ATAD2,BRIP1,ZPR1,PCNA,RRM2,PARPBP,E2F2,CDC45,CBFB,CDC6,TIMELESS,CAV1,KPNA2,MLX,CCND1,KLF10,DSCC1,NEK2,HMGB2,POLQ,PPM1D,SREBF1,CDCA4,RFC2,NDP,TRAIP,DEPDC1,MLXIP,MIS18A,NR3C2,DAXX,MXD3,EGLN3,DEK,TRIM26,RTKN2,DLGAP5,ABT1,RFC3,PFN1,LOXL2,BRCA1,YBX3,CNOT1,E2F7,ZSC…
GO:BP	regulation of catalytic activity	GO:0050790	0.04274122641099765	1.369153020405753	2452	413	75	18123	PTTG1,NCAPH,KIF14,CCNB2,TPX2,CKS2,BIRC5,AURKB,SFRP2,ARHGAP11A,IQGAP3,PCOLCE,CDC25C,CCNB1,CCNA2,PLK1,DEPDC1B,UBE2C,MASTL,PBK,PCNA,ECT2,CDC20,KNL1,CDC6,CAV1,CCND1,CENPE,DSCC1,BORA,NEK2,CKS1B,HMGB2,MCM2,ARHGEF39,CDKN3,RFC2,DEPDC1,RACGAP1,A2ML1,DAXX,TNFAIP8,EGLN3,SERPINI2,IQGAP2,RFC3,MAD2L1,MAP3K1,SERPINH1,CDC25A,ORAI1,CCNF,CLSPN,FBXO5,CORO1C,EZH2,DBF4,BBC3,CDC25B,EFNA1,ITGB1,SPOCD1,RRP1B,MSH6,FLT4,A…
GO:BP	positive regulation of cellular protein localization	GO:1903829	0.04569777927965899	1.3401049043070339	307	413	15	18123	CDK1,GTSE1,NDC80,MYO1C,PLK1,ZDHHC5,ZPR1,ECT2,CDT1,E2F1,BBC3,CCT6A,ITGB1,PINX1,RAN
GO:BP	peptidyl-serine modification	GO:0018209	0.04569777927965899	1.3401049043070339	337	413	16	18123	AURKA,PKN3,CDK2,CDK1,CHEK2,AURKB,SFRP2,CCNB1,PLK1,MASTL,TTK,CAV1,CLSPN,BGN,CDC7,BAX
GO:BP	male sex differentiation	GO:0046661	0.04632342669278689	1.3341993219333852	166	413	10	18123	ASPM,SFRP2,KIF18A,BRIP1,CCND1,HMGB2,YBX3,SDC1,FANCA,BAX
GO:BP	pyrimidine ribonucleotide salvage	GO:0010138	0.04640295937850987	1.3334543211526133	5	413	2	18123	UPP2,UCK2
GO:BP	thymidine metabolic process	GO:0046104	0.04640295937850987	1.3334543211526133	5	413	2	18123	TK1,DTYMK
GO:BP	assembly of actomyosin apparatus involved in cytokinesis	GO:0000912	0.04640295937850987	1.3334543211526133	5	413	2	18123	ECT2,RACGAP1
GO:BP	response to glycoside	GO:1903416	0.04640295937850987	1.3334543211526133	5	413	2	18123	CHEK2,RAD51
GO:BP	positive regulation of exit from mitosis	GO:0031536	0.04640295937850987	1.3334543211526133	5	413	2	18123	UBE2C,CDCA5
GO:BP	pyrimidine deoxyribonucleoside metabolic process	GO:0046125	0.04640295937850987	1.3334543211526133	5	413	2	18123	TK1,DTYMK
GO:BP	UMP salvage	GO:0044206	0.04640295937850987	1.3334543211526133	5	413	2	18123	UPP2,UCK2
GO:BP	actomyosin contractile ring assembly	GO:0000915	0.04640295937850987	1.3334543211526133	5	413	2	18123	ECT2,RACGAP1
GO:BP	strand invasion	GO:0042148	0.04640295937850987	1.3334543211526133	5	413	2	18123	RAD51,XRCC2
GO:BP	female meiosis chromosome segregation	GO:0016321	0.04640295937850987	1.3334543211526133	5	413	2	18123	PLK1,TTK
GO:BP	pyrimidine nucleotide salvage	GO:0032262	0.04640295937850987	1.3334543211526133	5	413	2	18123	UPP2,UCK2
GO:BP	regulation of intrinsic apoptotic signaling pathway	GO:2001242	0.04713301975804881	1.3266747346039462	167	413	10	18123	DDIAS,SFRP2,CAV1,RTKN2,YBX3,BBC3,HELLS,NONO,TRIAP1,BAX
GO:CC	chromosome	GO:0005694	1.5595413231407811e-43	42.807003113260635	1795	431	147	18964	HASPIN,MCM8,ASF1B,NUF2,CENPA,CDK1,NCAPH,CDCA8,FOXM1,POLA2,DSN1,SGO1,PRC1,NUSAP1,KIF2C,BIRC5,CHEK2,HJURP,ORC1,AURKB,KIF4A,FANCD2,CCDC86,CENPK,NDC80,TOP2A,CHAF1A,ERCC6L,CHEK1,MCM10,OIP5,SKA1,WDR76,PLK1,SPC24,ZWINT,SMC4,SKA3,DTL,BUB1,NCAPG,CDCA2,CDCA5,MKI67,TRIP13,ESCO2,CENPF,HMGA1,RAD51AP1,KIF18A,RAD51,TTK,CENPM,NCAPD2,PCNA,CENPN,PARPBP,E2F2,PRIM2,KNL1,CENPH,CENPL,SGO2,TIMELESS,MLX,CENPE,BUB1B,KLF1…
GO:CC	chromosomal region	GO:0098687	1.5595413231407811e-43	42.807003113260635	348	431	70	18964	NUF2,CENPA,CDK1,CDCA8,DSN1,SGO1,KIF2C,BIRC5,CHEK2,HJURP,ORC1,AURKB,CENPK,NDC80,TOP2A,ERCC6L,CHEK1,OIP5,SKA1,PLK1,SPC24,ZWINT,SMC4,SKA3,BUB1,NCAPG,CDCA5,ESCO2,CENPF,RAD51AP1,KIF18A,RAD51,TTK,CENPM,NCAPD2,PCNA,CENPN,KNL1,CENPH,CENPL,SGO2,CENPE,BUB1B,ZWILCH,DSCC1,NEK2,MCM2,CENPW,MCM3,MCM5,KNTC1,MIS18A,KNSTRN,DAXX,NSMCE2,MAD2L1,CENPI,KDM4D,DNMT1,BRCA2,CDT1,EZH2,CENPP,MCM4,MCM6,HELLS,NCAPD3,FEN1,PINX1…
GO:CC	intracellular non-membrane-bounded organelle	GO:0043232	9.314460914294708e-41	40.030842275359475	5094	431	250	18964	AURKA,HASPIN,MCM8,ASF1B,NUF2,CENPA,WEE1,SHCBP1,CDK2,CDK1,NCAPH,CDCA8,CEP55,FOXM1,KIF14,CCNB2,POLA2,KIF20A,TPX2,DSN1,SGO1,GTSE1,KIFC1,TGFB1I1,PRC1,PIMREG,NUSAP1,KIF2C,BIRC5,CHEK2,HJURP,KIF11,ORC1,AURKB,ASPM,KIF4A,FANCD2,CCDC86,CENPK,NDC80,RASL10A,TOP2A,CHAF1A,ERCC6L,CHEK1,CCNB1,MCM10,OIP5,MYO1C,SKA1,WDR76,PLK1,CEP152,SPC24,ZWINT,SMC4,SKA3,DTL,BUB1,NCAPG,CDCA2,CDCA5,MASTL,MKI67,TRIP13,ESCO2,ESPL1,H…
GO:CC	non-membrane-bounded organelle	GO:0043228	9.409786337401022e-41	40.026420237735465	5102	431	250	18964	AURKA,HASPIN,MCM8,ASF1B,NUF2,CENPA,WEE1,SHCBP1,CDK2,CDK1,NCAPH,CDCA8,CEP55,FOXM1,KIF14,CCNB2,POLA2,KIF20A,TPX2,DSN1,SGO1,GTSE1,KIFC1,TGFB1I1,PRC1,PIMREG,NUSAP1,KIF2C,BIRC5,CHEK2,HJURP,KIF11,ORC1,AURKB,ASPM,KIF4A,FANCD2,CCDC86,CENPK,NDC80,RASL10A,TOP2A,CHAF1A,ERCC6L,CHEK1,CCNB1,MCM10,OIP5,MYO1C,SKA1,WDR76,PLK1,CEP152,SPC24,ZWINT,SMC4,SKA3,DTL,BUB1,NCAPG,CDCA2,CDCA5,MASTL,MKI67,TRIP13,ESCO2,ESPL1,H…
GO:CC	chromosome, centromeric region	GO:0000775	1.150214038392474e-40	39.939221336130416	200	431	54	18964	NUF2,CENPA,CDCA8,DSN1,SGO1,KIF2C,BIRC5,HJURP,AURKB,CENPK,NDC80,TOP2A,ERCC6L,OIP5,SKA1,PLK1,SPC24,ZWINT,SMC4,SKA3,BUB1,NCAPG,CDCA5,ESCO2,CENPF,KIF18A,TTK,CENPM,NCAPD2,CENPN,KNL1,CENPH,CENPL,SGO2,CENPE,BUB1B,ZWILCH,DSCC1,NEK2,CENPW,KNTC1,MIS18A,KNSTRN,DAXX,MAD2L1,CENPI,KDM4D,DNMT1,CDT1,CENPP,HELLS,NCAPD3,PINX1,INCENP
GO:CC	nuclear lumen	GO:0031981	3.4923102722556534e-34	33.4568871786141	4453	431	220	18964	ZNF367,AURKA,HASPIN,MCM8,ASF1B,NUF2,CENPA,WEE1,CDK2,CDK1,NCAPH,CDCA8,FOXM1,POLA2,KIF20A,TPX2,DSN1,SGO1,GTSE1,TGFB1I1,PRC1,PIMREG,NUSAP1,BIRC5,CHEK2,HJURP,ORC1,AURKB,KIF4A,FANCD2,CCDC86,CENPK,NDC80,FANCC,RASL10A,TOP2A,CHEK1,CDC25C,CCNB1,MCM10,CCNA2,OIP5,MYO1C,PLK1,CEP152,SPC24,ZWINT,SMC4,UBE2C,DTL,BUB1,CDCA2,CDCA5,MASTL,MYBL2,MKI67,ESCO2,CENPF,PIM1,RIOK1,HMGA1,SNRPB,RAD51AP1,KIF23,RAD51,ATAD2,EXO1…
GO:CC	nucleoplasm	GO:0005654	4.2592381105908256e-33	32.370668080230296	4112	431	208	18964	ZNF367,AURKA,HASPIN,MCM8,ASF1B,NUF2,CENPA,WEE1,CDK2,CDK1,NCAPH,CDCA8,FOXM1,POLA2,KIF20A,TPX2,DSN1,SGO1,GTSE1,PRC1,PIMREG,BIRC5,CHEK2,HJURP,ORC1,AURKB,KIF4A,FANCD2,CCDC86,CENPK,NDC80,FANCC,TOP2A,CHEK1,CDC25C,CCNB1,MCM10,CCNA2,OIP5,MYO1C,PLK1,CEP152,SPC24,ZWINT,SMC4,UBE2C,DTL,BUB1,CDCA2,CDCA5,MASTL,MYBL2,MKI67,ESCO2,CENPF,PIM1,RIOK1,HMGA1,SNRPB,RAD51AP1,KIF23,RAD51,ATAD2,EXO1,BRIP1,CENPM,NCAPD2,ZPR…
GO:CC	nucleus	GO:0005634	1.7699306589677439e-32	31.752043747772415	7607	431	297	18964	ZNF367,DDIAS,AURKA,NRM,HASPIN,MCM8,ASF1B,NUF2,PTTG1,CENPA,WEE1,PKN3,CDK2,CDK1,NCAPH,CDCA8,FOXM1,KIF14,CCNB2,POLA2,KIF20A,TPX2,DSN1,SGO1,GTSE1,KIFC1,TGFB1I1,PRC1,PIMREG,NUSAP1,KIF2C,BIRC5,CHEK2,HJURP,KIF11,MELK,ORC1,AURKB,ASPM,KIF4A,FANCD2,CCDC86,CENPK,NDC80,FANCC,RASL10A,ARHGAP11A,TOP2A,CHAF1A,CHEK1,CDC25C,CCNB1,MCM10,CCNA2,OIP5,MYO1C,WDR76,PLK1,CEP152,SPC24,ZWINT,SMC4,UBE2C,DTL,BUB1,NCAPG,CDCA2,…
GO:CC	condensed chromosome	GO:0000793	7.713833703091138e-31	30.11272972800671	239	431	49	18964	NUF2,CENPA,DSN1,SGO1,KIF2C,BIRC5,AURKB,FANCD2,CENPK,NDC80,TOP2A,ERCC6L,CHEK1,SKA1,PLK1,SPC24,ZWINT,SKA3,BUB1,NCAPG,MKI67,CENPF,KIF18A,RAD51,TTK,CENPM,NCAPD2,CENPN,KNL1,CENPH,SGO2,CENPE,BUB1B,ZWILCH,NEK2,HMGB2,CENPW,KNTC1,KNSTRN,NSMCE2,MAD2L1,BRCA1,CENPI,BRCA2,CDT1,NCAPD3,PINX1,INCENP,RCC1
GO:CC	condensed chromosome, centromeric region	GO:0000779	2.4771490070308694e-29	28.60604786867258	144	431	39	18964	NUF2,CENPA,DSN1,SGO1,KIF2C,BIRC5,AURKB,CENPK,NDC80,ERCC6L,SKA1,PLK1,SPC24,ZWINT,SKA3,BUB1,NCAPG,CENPF,KIF18A,TTK,CENPM,NCAPD2,CENPN,KNL1,CENPH,SGO2,CENPE,BUB1B,ZWILCH,NEK2,CENPW,KNTC1,KNSTRN,MAD2L1,CENPI,CDT1,NCAPD3,PINX1,INCENP
GO:CC	membrane-enclosed lumen	GO:0031974	1.9415303781329834e-28	27.7118558098811	5579	431	239	18964	ZNF367,AURKA,HASPIN,MCM8,ASF1B,NUF2,CENPA,WEE1,CDK2,CDK1,NCAPH,CDCA8,FOXM1,POLA2,KIF20A,TPX2,DSN1,SGO1,GTSE1,TGFB1I1,PRC1,PIMREG,NUSAP1,BIRC5,CHEK2,HJURP,ORC1,AURKB,KIF4A,FANCD2,CCDC86,CENPK,NDC80,FANCC,RASL10A,TOP2A,CHEK1,CDC25C,CCNB1,MCM10,CCNA2,OIP5,MYO1C,FKBP7,PLK1,CEP152,SPC24,ZWINT,SMC4,UBE2C,DTL,BUB1,CDCA2,CDCA5,MASTL,MYBL2,MKI67,ESCO2,CENPF,PIM1,RIOK1,HMGA1,SNRPB,RAD51AP1,KIF23,RAD51,ATAD…
GO:CC	organelle lumen	GO:0043233	1.9415303781329834e-28	27.7118558098811	5579	431	239	18964	ZNF367,AURKA,HASPIN,MCM8,ASF1B,NUF2,CENPA,WEE1,CDK2,CDK1,NCAPH,CDCA8,FOXM1,POLA2,KIF20A,TPX2,DSN1,SGO1,GTSE1,TGFB1I1,PRC1,PIMREG,NUSAP1,BIRC5,CHEK2,HJURP,ORC1,AURKB,KIF4A,FANCD2,CCDC86,CENPK,NDC80,FANCC,RASL10A,TOP2A,CHEK1,CDC25C,CCNB1,MCM10,CCNA2,OIP5,MYO1C,FKBP7,PLK1,CEP152,SPC24,ZWINT,SMC4,UBE2C,DTL,BUB1,CDCA2,CDCA5,MASTL,MYBL2,MKI67,ESCO2,CENPF,PIM1,RIOK1,HMGA1,SNRPB,RAD51AP1,KIF23,RAD51,ATAD…
GO:CC	intracellular organelle lumen	GO:0070013	1.9415303781329834e-28	27.7118558098811	5579	431	239	18964	ZNF367,AURKA,HASPIN,MCM8,ASF1B,NUF2,CENPA,WEE1,CDK2,CDK1,NCAPH,CDCA8,FOXM1,POLA2,KIF20A,TPX2,DSN1,SGO1,GTSE1,TGFB1I1,PRC1,PIMREG,NUSAP1,BIRC5,CHEK2,HJURP,ORC1,AURKB,KIF4A,FANCD2,CCDC86,CENPK,NDC80,FANCC,RASL10A,TOP2A,CHEK1,CDC25C,CCNB1,MCM10,CCNA2,OIP5,MYO1C,FKBP7,PLK1,CEP152,SPC24,ZWINT,SMC4,UBE2C,DTL,BUB1,CDCA2,CDCA5,MASTL,MYBL2,MKI67,ESCO2,CENPF,PIM1,RIOK1,HMGA1,SNRPB,RAD51AP1,KIF23,RAD51,ATAD…
GO:CC	kinetochore	GO:0000776	3.776738076555235e-27	26.422883133216185	133	431	36	18964	NUF2,CENPA,DSN1,SGO1,KIF2C,BIRC5,AURKB,CENPK,NDC80,ERCC6L,SKA1,PLK1,SPC24,ZWINT,SKA3,BUB1,CENPF,KIF18A,TTK,CENPM,CENPN,KNL1,CENPH,SGO2,CENPE,BUB1B,ZWILCH,NEK2,CENPW,KNTC1,KNSTRN,MAD2L1,CENPI,CDT1,PINX1,INCENP
GO:CC	spindle	GO:0005819	2.845995162511863e-26	25.545765842444354	390	431	55	18964	AURKA,HASPIN,SHCBP1,CDK1,CDCA8,KIF14,KIF20A,TPX2,SGO1,KIFC1,PRC1,NUSAP1,KIF2C,BIRC5,KIF11,AURKB,ASPM,KIF4A,CCNB1,SKA1,PLK1,SKA3,ESPL1,CENPF,KIF23,KIF18A,POC1A,CKAP2L,TTK,ECT2,KIF20B,CDC20,CDC6,CENPE,BUB1B,WDR62,BORA,TACC3,NEK2,KNTC1,RACGAP1,KNSTRN,DIAPH1,HAUS8,DLGAP5,MAD2L1,CKAP2,KIF15,FBXO5,HAUS1,CDC25B,CDC7,PINX1,INCENP,ODF2
GO:CC	microtubule cytoskeleton	GO:0015630	2.9552742282279635e-21	20.529402213503403	1313	431	92	18964	AURKA,HASPIN,SHCBP1,CDK2,CDK1,CDCA8,CEP55,KIF14,CCNB2,KIF20A,TPX2,SGO1,GTSE1,KIFC1,PRC1,NUSAP1,KIF2C,BIRC5,KIF11,AURKB,ASPM,KIF4A,NDC80,TOP2A,CHEK1,CCNB1,SKA1,PLK1,CEP152,SKA3,DTL,MASTL,ESPL1,HMMR,CENPF,CEP135,KIF23,KIF18A,POC1A,RAD51,CKAP2L,TTK,PCNA,ECT2,KIF20B,CDC45,CDC20,FRMD8,CDC6,CENPE,BUB1B,WDR62,BORA,TACC3,NEK2,MCM3,KNTC1,RACGAP1,KNSTRN,DIAPH1,RAD18,PCLAF,HAUS8,IQGAP2,DLGAP5,CCDC15,MAD2L1,…
GO:CC	intracellular organelle	GO:0043229	6.454030562380959e-18	17.190168982371535	13117	431	377	18964	ZNF367,DDIAS,AURKA,NRM,HASPIN,MCM8,ASF1B,NUF2,PTTG1,CENPA,WEE1,PKN3,SHCBP1,CDK2,CDK1,NCAPH,CDCA8,CEP55,FOXM1,KIF14,CCNB2,POLA2,KIF20A,TPX2,CHST1,DSN1,SGO1,GTSE1,KIFC1,TGFB1I1,PRC1,PIMREG,NUSAP1,KIF2C,BIRC5,CHEK2,HJURP,KIF11,MELK,ORC1,AURKB,ASPM,KIF4A,FANCD2,CCDC86,CENPK,NDC80,FANCC,RASL10A,ARHGAP11A,TOP2A,CHAF1A,ERCC6L,CHEK1,CDC25C,CCNB1,MCM10,CCNA2,OIP5,MYO1C,FKBP7,SKA1,WDR76,PLK1,CEP152,SPC24,Z…
GO:CC	centrosome	GO:0005813	1.2650199085133334e-16	15.897902639634845	620	431	55	18964	AURKA,HASPIN,CDK2,CDK1,CEP55,CCNB2,SGO1,KIF2C,AURKB,ASPM,NDC80,CHEK1,CCNB1,PLK1,CEP152,SKA3,DTL,MASTL,ESPL1,HMMR,CENPF,CEP135,KIF23,POC1A,CKAP2L,PCNA,KIF20B,CDC45,CDC20,FRMD8,WDR62,TACC3,NEK2,MCM3,KNSTRN,RAD18,PCLAF,HAUS8,DLGAP5,CCDC15,SLC1A4,CKAP2,DYNLRB2,CCNF,BRCA2,KIF15,E2F1,GLE1,TBC1D31,HAUS1,XRCC2,CDC25B,CCDC77,ODF2,NUP93
GO:CC	microtubule organizing center	GO:0005815	3.4248933564611933e-16	15.465352946922357	815	431	63	18964	AURKA,HASPIN,CDK2,CDK1,CEP55,CCNB2,SGO1,KIFC1,KIF2C,AURKB,ASPM,NDC80,TOP2A,CHEK1,CCNB1,PLK1,CEP152,SKA3,DTL,MASTL,ESPL1,HMMR,CENPF,CEP135,KIF23,KIF18A,POC1A,RAD51,CKAP2L,PCNA,KIF20B,CDC45,CDC20,FRMD8,BUB1B,WDR62,TACC3,NEK2,MCM3,KNSTRN,DIAPH1,RAD18,PCLAF,HAUS8,DLGAP5,CCDC15,SLC1A4,CKAP2,CFAP20,DYNLRB2,CCNF,BRCA2,KIF15,E2F1,GLE1,TBC1D31,HAUS1,XRCC2,CDC25B,CCDC77,ODF2,RAN,NUP93
GO:CC	mitotic spindle	GO:0072686	1.251098150947384e-15	14.902708617770418	161	431	28	18964	AURKA,CDK1,TPX2,KIFC1,PRC1,NUSAP1,KIF11,AURKB,ASPM,SKA1,PLK1,SKA3,ESPL1,KIF23,KIF18A,CKAP2L,ECT2,KIF20B,CDC6,CENPE,TACC3,RACGAP1,KNSTRN,DIAPH1,HAUS8,MAD2L1,HAUS1,CDC7
GO:CC	organelle	GO:0043226	2.752300445260889e-15	14.560304159609176	14027	431	387	18964	ZNF367,DDIAS,AURKA,NRM,HASPIN,MCM8,ASF1B,NUF2,PTTG1,CENPA,WEE1,PKN3,SHCBP1,CDK2,CDK1,NCAPH,CDCA8,CEP55,FOXM1,KIF14,CCNB2,POLA2,KIF20A,TPX2,CHST1,DSN1,SGO1,GTSE1,KIFC1,TGFB1I1,PRC1,PIMREG,NUSAP1,KIF2C,BIRC5,CHEK2,HJURP,KIF11,MELK,ORC1,AURKB,ASPM,KIF4A,FANCD2,CCDC86,CENPK,NDC80,FANCC,RASL10A,ARHGAP11A,TOP2A,CHAF1A,ERCC6L,CHEK1,PCOLCE,CDC25C,CCNB1,MCM10,CCNA2,OIP5,MYO1C,FKBP7,SKA1,WDR76,PLK1,CEP152,…
GO:CC	intracellular membrane-bounded organelle	GO:0043231	4.307754277408568e-15	14.365749077660295	12046	431	351	18964	ZNF367,DDIAS,AURKA,NRM,HASPIN,MCM8,ASF1B,NUF2,PTTG1,CENPA,WEE1,PKN3,CDK2,CDK1,NCAPH,CDCA8,FOXM1,KIF14,CCNB2,POLA2,KIF20A,TPX2,CHST1,DSN1,SGO1,GTSE1,KIFC1,TGFB1I1,PRC1,PIMREG,NUSAP1,KIF2C,BIRC5,CHEK2,HJURP,KIF11,MELK,ORC1,AURKB,ASPM,KIF4A,FANCD2,CCDC86,CENPK,NDC80,FANCC,RASL10A,ARHGAP11A,TOP2A,CHAF1A,CHEK1,CDC25C,CCNB1,MCM10,CCNA2,OIP5,MYO1C,FKBP7,WDR76,PLK1,CEP152,SPC24,ZWINT,SMC4,UBE2C,DTL,BUB1,…
GO:CC	replication fork	GO:0005657	9.175270195901321e-15	14.037381137663212	67	431	19	18964	POLA2,CHEK1,MCM10,PCNA,PRIM2,TIMELESS,TONSL,MCM3,RFC2,RAD18,WDHD1,RFC3,DNMT1,POLH,XRCC2,SMARCAL1,RFC4,POLD3,PRIM1
GO:CC	nuclear chromosome	GO:0000228	1.193695751684939e-14	13.923106351767753	237	431	32	18964	POLA2,BIRC5,ORC1,TOP2A,CHEK1,MCM10,PLK1,RAD51,NCAPD2,PCNA,PRIM2,TIMELESS,NEK2,TONSL,MCM2,MCM3,MCM5,WDHD1,BRCA1,ORC6,BRCA2,GINS1,SMARCE1,MCM4,MCM6,SMARCAL1,PINX1,INCENP,POLD3,PRIM1,RCC1,GINS2
GO:CC	spindle pole	GO:0000922	2.890925761277573e-14	13.538963060830715	168	431	27	18964	AURKA,TPX2,SGO1,PRC1,KIF11,AURKB,ASPM,CCNB1,PLK1,CENPF,POC1A,CKAP2L,KIF20B,CDC20,CDC6,WDR62,TACC3,NEK2,KNTC1,KNSTRN,HAUS8,DLGAP5,MAD2L1,CKAP2,HAUS1,CDC25B,ODF2
GO:CC	supramolecular complex	GO:0099080	3.844541132460586e-14	13.41515548825075	1325	431	79	18964	AURKA,NUF2,CENPA,CDK1,KIF14,KIF20A,TPX2,DSN1,SGO1,GTSE1,KIFC1,PRC1,NUSAP1,KIF2C,BIRC5,KIF11,AURKB,ASPM,KIF4A,CENPK,NDC80,ERCC6L,MYO1C,SKA1,PLK1,SPC24,ZWINT,SKA3,BUB1,CENPF,KIF23,KIF18A,TTK,CENPM,LMNB1,KIF20B,CENPN,LMNB2,KNL1,CENPH,SGO2,CENPE,BUB1B,ZWILCH,NEK2,CENPW,KNTC1,RACGAP1,KNSTRN,COL4A1,DEK,HAUS8,IQGAP2,MAD2L1,SLC1A4,CNOT1,CENPI,COL4A2,CKAP2,CFAP20,DDX19B,DYNLRB2,TPM4,CDT1,UPP2,KIF15,IGFN1,…
GO:CC	intracellular anatomical structure	GO:0005622	5.0396382706439266e-14	13.297600634725331	14808	431	397	18964	ZNF367,DDIAS,AURKA,NRM,HASPIN,MCM8,ASF1B,NUF2,PTTG1,TP53I3,CENPA,WEE1,PKN3,SHCBP1,CDK2,CDK1,NCAPH,CDCA8,CEP55,FOXM1,KIF14,CCNB2,POLA2,KIF20A,TPX2,CHST1,DSN1,SGO1,GTSE1,KIFC1,TGFB1I1,PRC1,PIMREG,NUSAP1,KIF2C,BIRC5,CHEK2,HJURP,KIF11,MELK,ORC1,AURKB,ASPM,KIF4A,FANCD2,CCDC86,CENPK,NDC80,FANCC,RASL10A,ARHGAP11A,TOP2A,CHAF1A,ERCC6L,CHEK1,IQGAP3,TROAP,CDC25C,CDCA3,CCNB1,MCM10,CCNA2,OIP5,MYO1C,FKBP7,SKA1…
GO:CC	membrane-bounded organelle	GO:0043227	1.6492237605658422e-12	11.78272041689257	13201	431	366	18964	ZNF367,DDIAS,AURKA,NRM,HASPIN,MCM8,ASF1B,NUF2,PTTG1,CENPA,WEE1,PKN3,CDK2,CDK1,NCAPH,CDCA8,FOXM1,KIF14,CCNB2,POLA2,KIF20A,TPX2,CHST1,DSN1,SGO1,GTSE1,KIFC1,TGFB1I1,PRC1,PIMREG,NUSAP1,KIF2C,BIRC5,CHEK2,HJURP,KIF11,MELK,ORC1,AURKB,ASPM,KIF4A,FANCD2,CCDC86,CENPK,NDC80,FANCC,RASL10A,ARHGAP11A,TOP2A,CHAF1A,CHEK1,PCOLCE,CDC25C,CCNB1,MCM10,CCNA2,OIP5,MYO1C,FKBP7,WDR76,PLK1,CEP152,SPC24,ZWINT,SMC4,UBE2C,DT…
GO:CC	cytoskeleton	GO:0005856	1.6492237605658422e-12	11.78272041689257	2339	431	109	18964	AURKA,HASPIN,SHCBP1,CDK2,CDK1,CDCA8,CEP55,KIF14,CCNB2,KIF20A,TPX2,SGO1,GTSE1,KIFC1,TGFB1I1,PRC1,NUSAP1,KIF2C,BIRC5,KIF11,AURKB,ASPM,KIF4A,NDC80,TOP2A,CHEK1,CCNB1,MYO1C,SKA1,PLK1,CEP152,SKA3,DTL,MASTL,ESPL1,HMMR,CENPF,CEP135,KIF23,KIF18A,POC1A,RAD51,CKAP2L,TTK,LMNB1,PCNA,ECT2,KIF20B,ALDOC,LMNB2,CDC45,CDC20,FRMD8,CDC6,ZYX,CENPE,BUB1B,WDR62,BORA,TACC3,NEK2,FBLIM1,MCM3,KNTC1,RACGAP1,KNSTRN,DIAPH1,RAD…
GO:CC	microtubule	GO:0005874	5.5283646136448744e-12	11.257403321554255	435	431	39	18964	AURKA,CDK1,KIF14,KIF20A,TPX2,GTSE1,KIFC1,PRC1,NUSAP1,KIF2C,BIRC5,KIF11,AURKB,ASPM,KIF4A,SKA1,PLK1,SKA3,KIF23,KIF18A,KIF20B,CENPE,NEK2,KNTC1,RACGAP1,KNSTRN,HAUS8,IQGAP2,CKAP2,CFAP20,DYNLRB2,KIF15,DPP9,CCT6A,HAUS1,KIF6,TUBB,INCENP,ODF2
GO:CC	spindle midzone	GO:0051233	2.3847476148537827e-10	9.622557576907417	36	431	12	18964	AURKA,CDCA8,KIF14,PRC1,AURKB,PLK1,KIF18A,KIF20B,CDC6,CENPE,RACGAP1,INCENP
GO:CC	DNA replication preinitiation complex	GO:0031261	5.654023534796367e-10	9.24764238809784	12	431	8	18964	CDC45,MCM2,MCM3,MCM5,GINS1,MCM4,MCM6,GINS2
GO:CC	spindle microtubule	GO:0005876	8.998665754527731e-10	9.045821879272047	71	431	15	18964	AURKA,CDK1,PRC1,BIRC5,KIF11,AURKB,KIF4A,SKA1,PLK1,SKA3,KIF18A,CENPE,KNTC1,HAUS8,HAUS1
GO:CC	cytosol	GO:0005829	1.1579066162667941e-9	8.936326464507879	5361	431	184	18964	AURKA,MCM8,NUF2,PTTG1,TP53I3,CENPA,CDK2,CDK1,NCAPH,CDCA8,KIF14,CCNB2,POLA2,TPX2,DSN1,SGO1,GTSE1,TGFB1I1,PRC1,KIF2C,BIRC5,KIF11,ORC1,AURKB,KIF4A,FANCD2,CENPK,NDC80,FANCC,ARHGAP11A,ERCC6L,CHEK1,IQGAP3,CDC25C,CDCA3,CCNB1,CCNA2,MYO1C,SKA1,PLK1,CEP152,SPC24,ZWINT,DEPDC1B,SMC4,UBE2C,SKA3,DTL,BUB1,NCAPG,CDCA2,CDCA5,MLC1,ESPL1,HMMR,CENPF,PIM1,RIOK1,CEP135,HMGA1,SNRPB,KIF23,KIF18A,CKAP2L,CENPM,NCAPD2,ECT2…
GO:CC	nuclear replication fork	GO:0043596	3.1849427416588617e-9	8.496898370928356	35	431	11	18964	POLA2,MCM10,PCNA,PRIM2,TIMELESS,TONSL,MCM3,WDHD1,SMARCAL1,POLD3,PRIM1
GO:CC	CMG complex	GO:0071162	5.562038382152393e-9	8.254766018510429	10	431	7	18964	MCM2,MCM3,MCM5,GINS1,MCM4,MCM6,GINS2
GO:CC	nuclear protein-containing complex	GO:0140513	7.843814511264035e-9	8.105472684979645	1236	431	64	18964	POLA2,DSN1,ORC1,FANCC,MCM10,MYO1C,UBE2C,MYBL2,HMGA1,SNRPB,PCNA,E2F2,PRIM2,CDC45,CBFB,CDC20,TIMELESS,POLR1H,SF3B3,BUB1B,TONSL,MCM2,MCM3,MCM5,WDR12,FANCE,MAD2L1,BRCA1,E2F7,ORC6,E2F3,DDX19B,FANCB,GINS1,E2F1,GLE1,EZH2,FAAP24,SMARCE1,NUP188,MCM4,FANCA,POLR3D,MCM6,XRCC2,SMARCAL1,NONO,MSH6,BCOR,PRPF4,UTP4,NXT1,EXOSC3,POLD3,PRIM1,EIF5A,CLP1,CBX8,INTS7,GINS2,POLR2D,RAN,NUP93,KPNB1
GO:CC	midbody	GO:0030496	1.310792100567492e-8	7.882466184538888	197	431	22	18964	AURKA,SHCBP1,CDK1,CDCA8,CEP55,KIF14,KIF20A,PRC1,BIRC5,AURKB,ASPM,KIF4A,PLK1,CENPF,KIF23,ECT2,KIF20B,CENPE,NEK2,RACGAP1,INCENP,RAN
GO:CC	MCM complex	GO:0042555	3.2573538298887384e-8	7.487135063657445	12	431	7	18964	MCM8,TONSL,MCM2,MCM3,MCM5,MCM4,MCM6
GO:CC	condensin complex	GO:0000796	5.318035263330347e-8	7.274248787234048	8	431	6	18964	NCAPH,SMC4,NCAPG,NCAPD2,NCAPG2,NCAPD3
GO:CC	polymeric cytoskeletal fiber	GO:0099513	8.495526254379324e-8	7.070809713640829	766	431	45	18964	AURKA,CDK1,KIF14,KIF20A,TPX2,GTSE1,KIFC1,PRC1,NUSAP1,KIF2C,BIRC5,KIF11,AURKB,ASPM,KIF4A,MYO1C,SKA1,PLK1,SKA3,KIF23,KIF18A,LMNB1,KIF20B,LMNB2,CENPE,NEK2,KNTC1,RACGAP1,KNSTRN,HAUS8,IQGAP2,SLC1A4,CKAP2,CFAP20,DYNLRB2,TPM4,UPP2,KIF15,DPP9,CCT6A,HAUS1,KIF6,TUBB,INCENP,ODF2
GO:CC	cyclin-dependent protein kinase holoenzyme complex	GO:0000307	4.58757001778543e-7	6.338417294269926	43	431	10	18964	CDK2,CDK1,CCNB2,CKS2,CCNB1,CCNA2,PCNA,CCND1,CKS1B,CCNF
GO:CC	nucleolus	GO:0005730	4.671638780309458e-7	6.33053074504445	955	431	50	18964	WEE1,CDCA8,DSN1,PIMREG,NUSAP1,HJURP,FANCD2,CCDC86,RASL10A,TOP2A,MCM10,MYO1C,SPC24,DTL,MKI67,PIM1,ZPR1,KIF20B,CENPH,POLR1H,SF3B3,REXO5,NEK2,HMGB2,PPM1D,JPT1,CENPW,FBLIM1,TRAIP,WDR12,DAXX,NIP7,ABT1,EME1,ORC6,PAK1IP1,GLE1,UBE2T,CENPP,N4BP1,FEN1,VMP1,RRP1B,NONO,UTP4,PINX1,EXOSC3,C1QBP,RAN,ISG20L2
GO:CC	replisome	GO:0030894	4.6995238386562554e-7	6.327946143068548	24	431	8	18964	POLA2,PCNA,PRIM2,TONSL,MCM3,SMARCAL1,POLD3,PRIM1
GO:CC	chromosome passenger complex	GO:0032133	4.6995238386562554e-7	6.327946143068548	6	431	5	18964	AURKA,CDCA8,BIRC5,AURKB,INCENP
GO:CC	microtubule associated complex	GO:0005875	4.944289051226221e-7	6.305896147611186	164	431	18	18964	AURKA,CDCA8,KIF14,KIF20A,KIFC1,KIF2C,BIRC5,KIF11,AURKB,KIF23,KIF18A,KIF20B,HAUS8,DYNLRB2,KIF15,HAUS1,KIF6,INCENP
GO:CC	protein-containing complex	GO:0032991	0.0000015844731708195005	5.800115110127004	5541	431	176	18964	AURKA,MCM8,ASF1B,NUF2,CENPA,CDK2,CDK1,NCAPH,CDCA8,KIF14,CCNB2,POLA2,KIF20A,DSN1,CKS2,KIFC1,KIF2C,BIRC5,KIF11,ORC1,AURKB,NDC80,FANCC,TOP2A,CHAF1A,CHEK1,CCNB1,MCM10,CCNA2,MYO1C,SKA1,SPC24,SMC4,UBE2C,SKA3,DTL,NCAPG,MYBL2,CENPF,RIOK1,HMGA1,SNRPB,RAD51AP1,KIF23,KIF18A,RAD51,NCAPD2,PCNA,ECT2,RRM2,KIF20B,E2F2,PRIM2,CDC45,CBFB,CDC20,PON1,GEMIN6,SGO2,TIMELESS,CAV1,DAP3,POLR1H,CCND1,SF3B3,BUB1B,ZWILCH,DSCC…
GO:CC	chromosome, telomeric region	GO:0000781	0.0000018236409246845714	5.7390606702728535	160	431	17	18964	CDK1,CHEK2,ORC1,CHEK1,RAD51AP1,RAD51,PCNA,MCM2,MCM3,MCM5,NSMCE2,BRCA2,EZH2,MCM4,MCM6,FEN1,PINX1
GO:CC	supramolecular polymer	GO:0099081	0.00000199493151706583	5.7000720083837	1005	431	50	18964	AURKA,CDK1,KIF14,KIF20A,TPX2,GTSE1,KIFC1,PRC1,NUSAP1,KIF2C,BIRC5,KIF11,AURKB,ASPM,KIF4A,MYO1C,SKA1,PLK1,SKA3,KIF23,KIF18A,LMNB1,KIF20B,LMNB2,CENPE,NEK2,KNTC1,RACGAP1,KNSTRN,COL4A1,DEK,HAUS8,IQGAP2,SLC1A4,COL4A2,CKAP2,CFAP20,DYNLRB2,TPM4,UPP2,KIF15,IGFN1,DPP9,CORO1C,CCT6A,HAUS1,KIF6,TUBB,INCENP,ODF2
GO:CC	kinesin complex	GO:0005871	0.0000026487207003817136	5.5769638343332195	52	431	10	18964	KIF14,KIF20A,KIFC1,KIF2C,KIF11,KIF23,KIF18A,KIF20B,KIF15,KIF6
GO:CC	nuclear replisome	GO:0043601	0.00000440413679721009	5.356139199838615	22	431	7	18964	POLA2,PRIM2,TONSL,MCM3,SMARCAL1,POLD3,PRIM1
GO:CC	pericentric heterochromatin	GO:0005721	0.000006088187217367847	5.215512001076574	23	431	7	18964	CENPA,ESCO2,KDM4D,DNMT1,HELLS,NCAPD3,INCENP
GO:CC	chromatin	GO:0000785	0.000006562150281157014	5.182953827968581	1235	431	56	18964	ASF1B,CENPA,FOXM1,CHAF1A,CHEK1,OIP5,WDR76,PLK1,CDCA5,ESCO2,CENPF,HMGA1,RAD51AP1,RAD51,PCNA,PARPBP,E2F2,TIMELESS,MLX,KLF10,DSCC1,TONSL,HMGB2,SREBF1,MCM2,FAM111B,MLXIP,MIS18A,NR3C2,MXD3,LOXL2,EME1,E2F7,KDM4D,E2F3,DNMT1,NFIL3,E2F1,TEAD4,EZH2,SMARCE1,HELLS,NCAPD3,FOXD2,MKX,FAM47E,MSH6,TMPO,MXD1,EXOSC3,INCENP,H2BC15,RCC1,CBX8,RAN,HMGN4
GO:CC	supramolecular fiber	GO:0099512	0.000008424102835638641	5.07447634022264	997	431	48	18964	AURKA,CDK1,KIF14,KIF20A,TPX2,GTSE1,KIFC1,PRC1,NUSAP1,KIF2C,BIRC5,KIF11,AURKB,ASPM,KIF4A,MYO1C,SKA1,PLK1,SKA3,KIF23,KIF18A,LMNB1,KIF20B,LMNB2,CENPE,NEK2,KNTC1,RACGAP1,KNSTRN,DEK,HAUS8,IQGAP2,SLC1A4,CKAP2,CFAP20,DYNLRB2,TPM4,UPP2,KIF15,IGFN1,DPP9,CORO1C,CCT6A,HAUS1,KIF6,TUBB,INCENP,ODF2
GO:CC	heterochromatin	GO:0000792	0.00001204157093937884	4.919316851467013	76	431	11	18964	CENPA,WDR76,ESCO2,HMGA1,EME1,KDM4D,DNMT1,HELLS,NCAPD3,INCENP,CBX8
GO:CC	alpha DNA polymerase:primase complex	GO:0005658	0.00001368374930311958	4.863794891025205	5	431	4	18964	POLA2,PRIM2,MCM3,PRIM1
GO:CC	protein-DNA complex	GO:0032993	0.000018722045291133973	4.727646708475442	212	431	18	18964	CENPA,POLA2,PCNA,PRIM2,CDC45,TONSL,MCM2,MCM3,MCM5,GINS1,TEAD4,MCM4,MCM6,SMARCAL1,H2BC15,POLD3,PRIM1,GINS2
GO:CC	serine/threonine protein kinase complex	GO:1902554	0.00004998187712025645	4.301187437532082	88	431	11	18964	CDK2,CDK1,CCNB2,CKS2,CCNB1,CCNA2,PCNA,CCND1,CKS1B,CCNF,ACVR1
GO:CC	intercellular bridge	GO:0045171	0.00008313170534233153	4.080233310401897	76	431	10	18964	CDCA8,CEP55,KIF20A,TPX2,PRC1,KIF23,KIF20B,CDC6,USB1,CDC7
GO:CC	site of DNA damage	GO:0090734	0.00008313170534233153	4.080233310401897	93	431	11	18964	WDR76,ESCO2,RAD51,TIMELESS,RFWD3,TRAIP,RAD18,KDM4D,POLH,SMARCAL1,HROB
GO:CC	chromocenter	GO:0010369	0.00009425427575976978	4.025698939299844	14	431	5	18964	CDCA8,AURKB,OIP5,ESCO2,INCENP
GO:CC	Fanconi anaemia nuclear complex	GO:0043240	0.00009425427575976978	4.025698939299844	14	431	5	18964	FANCC,FANCE,FANCB,FAAP24,FANCA
GO:CC	mitotic spindle midzone	GO:1990023	0.00009425427575976978	4.025698939299844	14	431	5	18964	PRC1,AURKB,KIF18A,KIF20B,CENPE
GO:CC	transferase complex, transferring phosphorus-containing groups	GO:0061695	0.00010705681579866513	3.97038567802371	266	431	19	18964	CDK2,CDK1,CCNB2,POLA2,CKS2,CCNB1,CCNA2,PCNA,PRIM2,POLR1H,CCND1,CKS1B,MCM3,CCNF,POLR3D,ACVR1,POLD3,PRIM1,POLR2D
GO:CC	centralspindlin complex	GO:0097149	0.00010705681579866513	3.97038567802371	3	431	3	18964	KIF23,ECT2,RACGAP1
GO:CC	meiotic spindle	GO:0072687	0.00013243958177570848	3.8779821993544963	15	431	5	18964	AURKA,ASPM,BORA,FBXO5,INCENP
GO:CC	Ctf18 RFC-like complex	GO:0031390	0.00015163274489012315	3.81920700325881	8	431	4	18964	DSCC1,RFC2,RFC3,RFC4
GO:CC	nuclear pore	GO:0005643	0.00019759029632893186	3.704234387452229	85	431	10	18964	MYO1C,MAD2L1,DDX19B,GLE1,NUP188,NXT1,EIF5A,RAN,NUP93,KPNB1
GO:CC	centriole	GO:0005814	0.00020408766948395678	3.6901832335830185	143	431	13	18964	AURKA,CEP55,TOP2A,PLK1,CEP152,CEP135,POC1A,WDR62,CFAP20,CCNF,GLE1,ODF2,RAN
GO:CC	protein kinase complex	GO:1902911	0.0002085020030015032	3.6808897685639805	104	431	11	18964	CDK2,CDK1,CCNB2,CKS2,CCNB1,CCNA2,PCNA,CCND1,CKS1B,CCNF,ACVR1
GO:CC	Ndc80 complex	GO:0031262	0.00037761456925166124	3.4229512579556993	4	431	3	18964	NUF2,NDC80,SPC24
GO:CC	NMS complex	GO:0031617	0.00037761456925166124	3.4229512579556993	4	431	3	18964	NUF2,NDC80,SPC24
GO:CC	outer kinetochore	GO:0000940	0.0004026487251365678	3.3950736716293717	10	431	4	18964	SKA1,SKA3,CENPF,BUB1B
GO:CC	nuclear body	GO:0016604	0.00043752054736771783	3.3590015463013856	816	431	37	18964	CDK2,DSN1,CHEK2,FANCD2,CDC25C,OIP5,MYO1C,ZWINT,SMC4,MKI67,RAD51,EXO1,ZPR1,PCNA,ECT2,KNL1,GEMIN6,SGO2,RFWD3,TONSL,DAXX,RAD18,NSMCE2,BRCA1,CENPI,E2F7,CDT1,NCAPG2,DBF4,N4BP1,NONO,DDX39A,PRPF4,NXT1,INCENP,INTS7,POLR2D
GO:CC	DNA polymerase complex	GO:0042575	0.0005477700309677413	3.2614017321064708	20	431	5	18964	POLA2,PRIM2,MCM3,POLD3,PRIM1
GO:CC	nuclear envelope	GO:0005635	0.000652652455618901	3.1853180236061993	471	431	25	18964	NRM,MYO1C,DTL,CENPF,BRIP1,LMNB1,LMNB2,MLX,CCND1,SREBF1,JPT1,MAD2L1,DDX19B,GLE1,NUP188,NEMP1,NXT1,TMPO,TUBB,EIF5A,RCC1,BAX,RAN,NUP93,KPNB1
GO:CC	DNA replication factor C complex	GO:0005663	0.0008678076301797011	3.06157653566524	5	431	3	18964	RFC2,RFC3,RFC4
GO:CC	site of double-strand break	GO:0035861	0.001261016395465431	2.8992792667862557	69	431	8	18964	ESCO2,RAD51,TIMELESS,RFWD3,RAD18,KDM4D,POLH,SMARCAL1
GO:CC	pronucleus	GO:0045120	0.0016497866209139909	2.7825722226661878	14	431	4	18964	AURKA,CCNA2,CENPF,EZH2
GO:CC	condensed nuclear chromosome	GO:0000794	0.0018265139769301677	2.7383770001121133	73	431	8	18964	CHEK1,PLK1,RAD51,NEK2,BRCA1,BRCA2,INCENP,RCC1
GO:CC	lateral element	GO:0000800	0.002154919299881357	2.6665689892027675	15	431	4	18964	RAD51,BRCA1,BRCA2,INCENP
GO:CC	cytoplasm	GO:0005737	0.0027213525490704014	2.565215192068901	11951	431	305	18964	DDIAS,AURKA,HASPIN,MCM8,NUF2,PTTG1,TP53I3,CENPA,WEE1,PKN3,SHCBP1,CDK2,CDK1,NCAPH,CDCA8,CEP55,KIF14,CCNB2,POLA2,KIF20A,TPX2,CHST1,DSN1,SGO1,GTSE1,KIFC1,TGFB1I1,PRC1,NUSAP1,KIF2C,BIRC5,CHEK2,HJURP,KIF11,MELK,ORC1,AURKB,ASPM,KIF4A,FANCD2,CENPK,NDC80,FANCC,ARHGAP11A,TOP2A,ERCC6L,CHEK1,IQGAP3,TROAP,CDC25C,CDCA3,CCNB1,CCNA2,MYO1C,FKBP7,SKA1,PLK1,CEP152,SPC24,ZWINT,DEPDC1B,SMC4,UBE2C,SKA3,DTL,BUB1,NCAPG…
GO:CC	kinetochore microtubule	GO:0005828	0.002723422245524471	2.564885019444166	7	431	3	18964	KIF18A,CENPE,KNTC1
GO:CC	nuclear microtubule	GO:0005880	0.003512725187602036	2.4543558252083817	2	431	2	18964	TPX2,HAUS8
GO:CC	integrin alpha5-beta1 complex	GO:0034674	0.003512725187602036	2.4543558252083817	2	431	2	18964	ITGA5,ITGB1
GO:CC	cyclin B1-CDK1 complex	GO:0097125	0.003512725187602036	2.4543558252083817	2	431	2	18964	CDK1,CCNB1
GO:CC	nuclear ubiquitin ligase complex	GO:0000152	0.003512725187602036	2.4543558252083817	45	431	6	18964	UBE2C,CDC20,BUB1B,BRCA1,BCOR,CBX8
GO:CC	origin recognition complex	GO:0000808	0.005891944502632329	2.2297413525140724	9	431	3	18964	ORC1,MCM2,ORC6
GO:CC	nuclear origin of replication recognition complex	GO:0005664	0.005891944502632329	2.2297413525140724	9	431	3	18964	ORC1,MCM2,ORC6
GO:CC	mitotic spindle pole	GO:0097431	0.008232414229082274	2.0844727853692064	36	431	5	18964	AURKA,AURKB,ASPM,PLK1,KIF20B
GO:CC	transferase complex	GO:1990234	0.008659063343969979	2.0625290833343333	795	431	32	18964	CDK2,CDK1,CCNB2,POLA2,CKS2,CCNB1,CCNA2,UBE2C,DTL,RIOK1,SNRPB,PCNA,PRIM2,CDC20,POLR1H,CCND1,BUB1B,CKS1B,MCM3,RAD18,NSMCE2,BRCA1,TRMT6,CCNF,EZH2,POLR3D,ACVR1,BCOR,POLD3,PRIM1,CBX8,POLR2D
GO:CC	cleavage furrow	GO:0032154	0.008811354985943081	2.0549573018411063	54	431	6	18964	CEP55,KIF20A,MASTL,ECT2,RACGAP1,ITGB1
GO:CC	RZZ complex	GO:1990423	0.009606308985582651	2.0174434484512314	3	431	2	18964	ZWILCH,KNTC1
GO:CC	replication fork protection complex	GO:0031298	0.009606308985582651	2.0174434484512314	3	431	2	18964	MCM10,TIMELESS
GO:CC	synaptonemal structure	GO:0099086	0.015579968154201066	1.807433434370058	42	431	5	18964	PLK1,RAD51,BRCA1,BRCA2,INCENP
GO:CC	synaptonemal complex	GO:0000795	0.015579968154201066	1.807433434370058	42	431	5	18964	PLK1,RAD51,BRCA1,BRCA2,INCENP
GO:CC	GINS complex	GO:0000811	0.018338122064983704	1.7366451407801489	4	431	2	18964	GINS1,GINS2
GO:CC	preribosome, small subunit precursor	GO:0030688	0.02618734369880942	1.5819085518021703	15	431	3	18964	RIOK1,NOB1,RRP1B
GO:CC	cyclin A2-CDK2 complex	GO:0097124	0.02949611726083979	1.5302351488751418	5	431	2	18964	CDK2,CCNA2
GO:CC	spindle pole centrosome	GO:0031616	0.03105849108643486	1.507819647408274	16	431	3	18964	AURKA,AURKB,DLGAP5
GO:CC	cell division site	GO:0032153	0.03418286223930248	1.4661915752404708	72	431	6	18964	CEP55,KIF20A,MASTL,ECT2,RACGAP1,ITGB1
GO:CC	DNA packaging complex	GO:0044815	0.03418286223930248	1.4661915752404708	119	431	8	18964	CENPA,NCAPH,SMC4,NCAPG,NCAPD2,NCAPG2,NCAPD3,H2BC15
GO:CC	Flemming body	GO:0090543	0.04544553762025396	1.342508754511188	35	431	4	18964	CEP55,KIF14,KIF23,RACGAP1
KEGG	Cell cycle	KEGG:04110	7.074449691634221e-28	27.150307337454823	124	189	36	8000	PTTG1,WEE1,CDK2,CDK1,CCNB2,CHEK2,ORC1,CHEK1,CDC25C,CCNB1,CCNA2,PLK1,BUB1,ESPL1,TTK,PCNA,E2F2,CDC45,CDC20,CDC6,CCND1,BUB1B,MCM2,MCM3,MCM5,MAD2L1,ORC6,CDC25A,E2F3,E2F1,DBF4,MCM4,MCM6,CDC25B,CDC7,CDKN2C
KEGG	DNA replication	KEGG:03030	8.364401563672503e-14	13.077565125459728	36	189	15	8000	POLA2,PCNA,PRIM2,MCM2,MCM3,MCM5,RFC2,RNASEH2A,RFC3,MCM4,MCM6,FEN1,RFC4,POLD3,PRIM1
KEGG	Fanconi anemia pathway	KEGG:03460	1.0009042542237017e-9	8.999607464829467	54	189	14	8000	FANCD2,FANCC,RAD51,BRIP1,FANCI,FANCE,EME1,BRCA1,FANCB,BRCA2,FAAP24,UBE2T,POLH,FANCA
KEGG	p53 signaling pathway	KEGG:04115	5.98794129718714e-7	6.22272246591627	73	189	13	8000	TP53I3,CDK2,CDK1,CCNB2,GTSE1,CHEK2,CHEK1,CCNB1,RRM2,CCND1,PPM1D,BBC3,BAX
KEGG	Mismatch repair	KEGG:03430	0.00002656346657459692	4.575715249485561	23	189	7	8000	EXO1,PCNA,RFC2,RFC3,MSH6,RFC4,POLD3
KEGG	Oocyte meiosis	KEGG:04114	0.00005802836563674054	4.2363596611249505	128	189	14	8000	AURKA,PTTG1,CDK2,CDK1,CCNB2,SGO1,CDC25C,CCNB1,PLK1,BUB1,ESPL1,CDC20,MAD2L1,FBXO5
KEGG	Human T-cell leukemia virus 1 infection	KEGG:05166	0.00008304335062421321	4.08069513627488	216	189	18	8000	PTTG1,CDK2,CCNB2,CHEK2,CHEK1,CCNA2,ESPL1,E2F2,CDC20,CCND1,BUB1B,MAD2L1,MAP3K1,E2F3,E2F1,CDKN2C,BAX,RAN
KEGG	Progesterone-mediated oocyte maturation	KEGG:04914	0.00008304335062421321	4.08069513627488	99	189	12	8000	AURKA,CDK2,CDK1,CCNB2,CDC25C,CCNB1,CCNA2,PLK1,BUB1,MAD2L1,CDC25A,CDC25B
KEGG	Homologous recombination	KEGG:03440	0.00009247695696116309	4.033966469545504	41	189	8	8000	RAD51,BRIP1,EME1,BRCA1,BRCA2,RAD54L,XRCC2,POLD3
KEGG	Small cell lung cancer	KEGG:05222	0.0001970391340750441	3.7054475097522683	92	189	11	8000	CDK2,CKS2,E2F2,CCND1,CKS1B,COL4A1,COL4A2,E2F3,E2F1,ITGB1,BAX
KEGG	Cellular senescence	KEGG:04218	0.00032432599370495863	3.4890182425998306	156	189	14	8000	CDK2,CDK1,FOXM1,CCNB2,CHEK2,CHEK1,CCNB1,CCNA2,MYBL2,E2F2,CCND1,CDC25A,E2F3,E2F1
KEGG	Platinum drug resistance	KEGG:01524	0.02504889689958038	1.6012113947857054	72	189	7	8000	BIRC5,TOP2A,BRCA1,POLH,BBC3,MSH6,BAX
KEGG	Pancreatic cancer	KEGG:05212	0.031704783218124526	1.498875211961144	76	189	7	8000	RAD51,E2F2,CCND1,E2F3,BRCA2,E2F1,BAX
KEGG	MicroRNAs in cancer	KEGG:05206	0.03874947694066269	1.411734155436821	310	189	16	8000	CDC25C,CDCA5,PIM1,KIF23,E2F2,CCND1,ITGA5,BRCA1,CDC25A,E2F3,DNMT1,E2F1,EZH2,CDC25B,EFNA1,PLAU
REAC	Cell Cycle	REAC:R-HSA-1640170	4.891966250667439e-75	74.31051654779263	679	293	129	10622	AURKA,MCM8,NUF2,PTTG1,CENPA,WEE1,CDK2,CDK1,NCAPH,CDCA8,FOXM1,CCNB2,POLA2,KIF20A,TPX2,DSN1,SGO1,GTSE1,KIF2C,BIRC5,CHEK2,HJURP,ORC1,AURKB,CENPK,NDC80,TOP2A,ERCC6L,CHEK1,CDC25C,CCNB1,MCM10,CCNA2,OIP5,SKA1,PLK1,CEP152,SPC24,ZWINT,SMC4,UBE2C,BUB1,NCAPG,CDCA5,MASTL,MYBL2,ESCO2,ESPL1,HMMR,CENPF,CEP135,KIF23,KIF18A,RAD51,EXO1,BRIP1,CENPM,NCAPD2,LMNB1,PCNA,RRM2,CENPN,E2F2,PRIM2,CDC45,CDC20,KNL1,CENPH,CENP…
REAC	Cell Cycle, Mitotic	REAC:R-HSA-69278	2.167268655474278e-68	67.66408725002853	549	293	113	10622	AURKA,MCM8,NUF2,PTTG1,CENPA,WEE1,CDK2,CDK1,NCAPH,CDCA8,FOXM1,CCNB2,POLA2,KIF20A,TPX2,DSN1,SGO1,GTSE1,KIF2C,BIRC5,ORC1,AURKB,CENPK,NDC80,TOP2A,ERCC6L,CDC25C,CCNB1,MCM10,CCNA2,SKA1,PLK1,CEP152,SPC24,ZWINT,SMC4,UBE2C,BUB1,NCAPG,CDCA5,MASTL,MYBL2,ESCO2,ESPL1,HMMR,CENPF,CEP135,KIF23,KIF18A,CENPM,NCAPD2,LMNB1,PCNA,RRM2,CENPN,E2F2,PRIM2,CDC45,CDC20,KNL1,CENPH,CENPL,TK1,CDC6,SGO2,CCND1,CENPE,BUB1B,ZWILCH…
REAC	Cell Cycle Checkpoints	REAC:R-HSA-69620	2.399751546173691e-40	39.61983371983477	290	293	66	10622	MCM8,NUF2,CENPA,WEE1,CDK2,CDK1,CDCA8,CCNB2,DSN1,SGO1,GTSE1,KIF2C,BIRC5,CHEK2,ORC1,AURKB,CENPK,NDC80,ERCC6L,CHEK1,CDC25C,CCNB1,MCM10,CCNA2,SKA1,PLK1,SPC24,ZWINT,UBE2C,BUB1,CENPF,KIF18A,EXO1,BRIP1,CENPM,CENPN,CDC45,CDC20,KNL1,CENPH,CENPL,CDC6,SGO2,CENPE,BUB1B,ZWILCH,MCM2,MCM3,MCM5,RFC2,KNTC1,RFC3,MAD2L1,BRCA1,CENPI,ORC6,CDC25A,CLSPN,CENPP,DBF4,MCM4,MCM6,CDC7,INCENP,H2BC15,RFC4
REAC	Mitotic Prometaphase	REAC:R-HSA-68877	5.60975673081766e-30	29.251055971676863	199	293	48	10622	NUF2,CENPA,CDK1,NCAPH,CDCA8,CCNB2,DSN1,SGO1,KIF2C,BIRC5,AURKB,CENPK,NDC80,ERCC6L,CCNB1,SKA1,PLK1,CEP152,SPC24,ZWINT,SMC4,BUB1,NCAPG,CDCA5,CENPF,CEP135,KIF18A,CENPM,NCAPD2,CENPN,CDC20,KNL1,CENPH,CENPL,SGO2,CENPE,BUB1B,ZWILCH,NEK2,KNTC1,HAUS8,MAD2L1,CENPI,CENPP,HAUS1,TUBB,INCENP,ODF2
REAC	M Phase	REAC:R-HSA-68886	5.60975673081766e-30	29.251055971676863	407	293	65	10622	NUF2,PTTG1,CENPA,CDK1,NCAPH,CDCA8,CCNB2,KIF20A,DSN1,SGO1,KIF2C,BIRC5,AURKB,CENPK,NDC80,ERCC6L,CCNB1,SKA1,PLK1,CEP152,SPC24,ZWINT,SMC4,UBE2C,BUB1,NCAPG,CDCA5,MASTL,ESPL1,CENPF,CEP135,KIF23,KIF18A,CENPM,NCAPD2,LMNB1,CENPN,CDC20,KNL1,CENPH,CENPL,SGO2,CENPE,BUB1B,ZWILCH,NEK2,KNTC1,HAUS8,MAD2L1,CENPI,FBXO5,NCAPG2,KMT5A,CENPP,NUP188,HAUS1,NCAPD3,TUBB,INCENP,H2BC15,RCC1,ODF2,RAN,NUP93,KPNB1
REAC	Resolution of Sister Chromatid Cohesion	REAC:R-HSA-2500257	1.3525857370997056e-26	25.8688351964845	123	293	37	10622	NUF2,CENPA,CDK1,CDCA8,CCNB2,DSN1,SGO1,KIF2C,BIRC5,AURKB,CENPK,NDC80,ERCC6L,CCNB1,SKA1,PLK1,SPC24,ZWINT,BUB1,CDCA5,CENPF,KIF18A,CENPM,CENPN,CDC20,KNL1,CENPH,CENPL,SGO2,CENPE,BUB1B,ZWILCH,KNTC1,MAD2L1,CENPI,CENPP,INCENP
REAC	Amplification of signal from the kinetochores	REAC:R-HSA-141424	1.5199523397569623e-26	25.818170029755933	92	293	33	10622	NUF2,CENPA,CDCA8,DSN1,SGO1,KIF2C,BIRC5,AURKB,CENPK,NDC80,ERCC6L,SKA1,PLK1,SPC24,ZWINT,BUB1,CENPF,KIF18A,CENPM,CENPN,CDC20,KNL1,CENPH,CENPL,SGO2,CENPE,BUB1B,ZWILCH,KNTC1,MAD2L1,CENPI,CENPP,INCENP
REAC	Amplification of signal from unattached kinetochores via a MAD2 inhibitory signal	REAC:R-HSA-141444	1.5199523397569623e-26	25.818170029755933	92	293	33	10622	NUF2,CENPA,CDCA8,DSN1,SGO1,KIF2C,BIRC5,AURKB,CENPK,NDC80,ERCC6L,SKA1,PLK1,SPC24,ZWINT,BUB1,CENPF,KIF18A,CENPM,CENPN,CDC20,KNL1,CENPH,CENPL,SGO2,CENPE,BUB1B,ZWILCH,KNTC1,MAD2L1,CENPI,CENPP,INCENP
REAC	Mitotic Metaphase and Anaphase	REAC:R-HSA-2555396	3.208540701489493e-26	25.49369244715659	229	293	47	10622	NUF2,PTTG1,CENPA,CDK1,CDCA8,CCNB2,DSN1,SGO1,KIF2C,BIRC5,AURKB,CENPK,NDC80,ERCC6L,CCNB1,SKA1,PLK1,SPC24,ZWINT,UBE2C,BUB1,CDCA5,ESPL1,CENPF,KIF18A,CENPM,LMNB1,CENPN,CDC20,KNL1,CENPH,CENPL,SGO2,CENPE,BUB1B,ZWILCH,KNTC1,MAD2L1,CENPI,FBXO5,CENPP,NUP188,INCENP,RCC1,RAN,NUP93,KPNB1
REAC	Mitotic Anaphase	REAC:R-HSA-68882	2.500392127557928e-25	24.60199187713587	228	293	46	10622	NUF2,PTTG1,CENPA,CDK1,CDCA8,CCNB2,DSN1,SGO1,KIF2C,BIRC5,AURKB,CENPK,NDC80,ERCC6L,CCNB1,SKA1,PLK1,SPC24,ZWINT,UBE2C,BUB1,CDCA5,ESPL1,CENPF,KIF18A,CENPM,LMNB1,CENPN,CDC20,KNL1,CENPH,CENPL,SGO2,CENPE,BUB1B,ZWILCH,KNTC1,MAD2L1,CENPI,CENPP,NUP188,INCENP,RCC1,RAN,NUP93,KPNB1
REAC	Mitotic Spindle Checkpoint	REAC:R-HSA-69618	3.5335383318570965e-25	24.451790193093075	109	293	34	10622	NUF2,CENPA,CDCA8,DSN1,SGO1,KIF2C,BIRC5,AURKB,CENPK,NDC80,ERCC6L,SKA1,PLK1,SPC24,ZWINT,UBE2C,BUB1,CENPF,KIF18A,CENPM,CENPN,CDC20,KNL1,CENPH,CENPL,SGO2,CENPE,BUB1B,ZWILCH,KNTC1,MAD2L1,CENPI,CENPP,INCENP
REAC	RHO GTPases Activate Formins	REAC:R-HSA-5663220	5.718390706835274e-24	23.242726174961636	136	293	36	10622	NUF2,CENPA,CDCA8,DSN1,SGO1,KIF2C,BIRC5,AURKB,CENPK,NDC80,ERCC6L,SKA1,PLK1,SPC24,ZWINT,BUB1,CENPF,KIF18A,CENPM,CENPN,CDC20,KNL1,CENPH,CENPL,SGO2,CENPE,BUB1B,ZWILCH,KNTC1,DIAPH1,MAD2L1,PFN1,CENPI,CENPP,ITGB1,INCENP
REAC	EML4 and NUDC in mitotic spindle formation	REAC:R-HSA-9648025	3.6747489034511186e-23	22.434772331020934	115	293	33	10622	NUF2,CENPA,CDCA8,DSN1,SGO1,KIF2C,BIRC5,AURKB,CENPK,NDC80,ERCC6L,SKA1,PLK1,SPC24,ZWINT,BUB1,CENPF,KIF18A,CENPM,CENPN,CDC20,KNL1,CENPH,CENPL,SGO2,CENPE,BUB1B,ZWILCH,KNTC1,MAD2L1,CENPI,CENPP,INCENP
REAC	Activation of ATR in response to replication stress	REAC:R-HSA-176187	4.731467544568834e-22	21.32500413459917	37	293	21	10622	MCM8,CDK2,ORC1,CHEK1,CDC25C,MCM10,CDC45,CDC6,MCM2,MCM3,MCM5,RFC2,RFC3,ORC6,CDC25A,CLSPN,DBF4,MCM4,MCM6,CDC7,RFC4
REAC	Mitotic G1 phase and G1/S transition	REAC:R-HSA-453279	1.4321539358237506e-21	20.844010299147016	148	293	35	10622	MCM8,WEE1,CDK2,CDK1,POLA2,ORC1,TOP2A,CCNB1,MCM10,CCNA2,MYBL2,PCNA,RRM2,E2F2,PRIM2,CDC45,TK1,CDC6,CCND1,CKS1B,MCM2,MCM3,MCM5,ORC6,CDC25A,E2F3,CDT1,E2F1,FBXO5,DBF4,MCM4,MCM6,CDC7,PRIM1,CDKN2C
REAC	Separation of Sister Chromatids	REAC:R-HSA-2467813	6.624678355660735e-20	19.178835202938735	188	293	37	10622	NUF2,PTTG1,CENPA,CDCA8,DSN1,SGO1,KIF2C,BIRC5,AURKB,CENPK,NDC80,ERCC6L,SKA1,PLK1,SPC24,ZWINT,UBE2C,BUB1,CDCA5,ESPL1,CENPF,KIF18A,CENPM,CENPN,CDC20,KNL1,CENPH,CENPL,SGO2,CENPE,BUB1B,ZWILCH,KNTC1,MAD2L1,CENPI,CENPP,INCENP
REAC	DNA Replication	REAC:R-HSA-69306	2.175005693030927e-19	18.66253960195133	128	293	31	10622	MCM8,CDK2,POLA2,ORC1,MCM10,CCNA2,UBE2C,PCNA,E2F2,PRIM2,CDC45,CDC6,MCM2,MCM3,MCM5,RFC2,RFC3,ORC6,E2F3,GINS1,CDT1,E2F1,DBF4,MCM4,MCM6,FEN1,CDC7,RFC4,POLD3,PRIM1,GINS2
REAC	DNA strand elongation	REAC:R-HSA-69190	8.196518338185786e-19	18.08637058512982	32	293	18	10622	MCM8,POLA2,PCNA,PRIM2,CDC45,MCM2,MCM3,MCM5,RFC2,RFC3,GINS1,MCM4,MCM6,FEN1,RFC4,POLD3,PRIM1,GINS2
REAC	Activation of the pre-replicative complex	REAC:R-HSA-68962	1.6663448659796579e-18	17.778235112237528	33	293	18	10622	MCM8,CDK2,POLA2,ORC1,MCM10,PRIM2,CDC45,CDC6,MCM2,MCM3,MCM5,ORC6,CDT1,DBF4,MCM4,MCM6,CDC7,PRIM1
REAC	S Phase	REAC:R-HSA-69242	3.0627912954561514e-18	17.513882595854163	162	293	33	10622	MCM8,WEE1,CDK2,POLA2,ORC1,CCNA2,UBE2C,CDCA5,ESCO2,PCNA,PRIM2,CDC45,CDC6,CCND1,CKS1B,MCM2,MCM3,MCM5,RFC2,RFC3,ORC6,CDC25A,GINS1,CDT1,E2F1,MCM4,MCM6,FEN1,CDC25B,RFC4,POLD3,PRIM1,GINS2
REAC	G1/S Transition	REAC:R-HSA-69206	4.441090025779769e-18	17.352510423110246	131	293	30	10622	MCM8,WEE1,CDK2,CDK1,POLA2,ORC1,CCNB1,MCM10,CCNA2,PCNA,RRM2,PRIM2,CDC45,TK1,CDC6,CCND1,CKS1B,MCM2,MCM3,MCM5,ORC6,CDC25A,CDT1,E2F1,FBXO5,DBF4,MCM4,MCM6,CDC7,PRIM1
REAC	RHO GTPase Effectors	REAC:R-HSA-195258	8.646075621173015e-17	16.063180970315837	319	293	43	10622	NUF2,CENPA,PKN3,CDCA8,KIF14,DSN1,SGO1,PRC1,KIF2C,BIRC5,AURKB,CENPK,NDC80,ERCC6L,IQGAP3,CDC25C,SKA1,PLK1,SPC24,ZWINT,BUB1,CENPF,KIF18A,CENPM,CENPN,CDC20,KNL1,CENPH,CENPL,SGO2,CENPE,BUB1B,ZWILCH,KNTC1,DIAPH1,IQGAP2,MAD2L1,PFN1,CENPI,CENPP,ITGB1,INCENP,H2BC15
REAC	G2/M Checkpoints	REAC:R-HSA-69481	7.601232597626128e-16	15.119115977858318	168	293	31	10622	MCM8,WEE1,CDK2,CDK1,CCNB2,GTSE1,CHEK2,ORC1,CHEK1,CDC25C,CCNB1,MCM10,EXO1,BRIP1,CDC45,CDC6,MCM2,MCM3,MCM5,RFC2,RFC3,BRCA1,ORC6,CDC25A,CLSPN,DBF4,MCM4,MCM6,CDC7,H2BC15,RFC4
REAC	Chromosome Maintenance	REAC:R-HSA-73886	2.5422370010211495e-15	14.59478396462474	139	293	28	10622	CENPA,CDK2,POLA2,HJURP,CENPK,CCNA2,OIP5,CENPM,PCNA,CENPN,PRIM2,KNL1,CENPH,CENPL,DSCC1,CENPW,RFC2,MIS18A,DAXX,RFC3,CENPI,CENPP,FEN1,H2BC15,RFC4,POLD3,PRIM1,POLR2D
REAC	Signaling by Rho GTPases, Miro GTPases and RHOBTB3	REAC:R-HSA-9716542	2.2432190421560454e-14	13.649128317074618	459	293	48	10622	NUF2,CENPA,PKN3,CDCA8,KIF14,DSN1,SGO1,PRC1,KIF2C,BIRC5,AURKB,CENPK,NDC80,ARHGAP11A,ERCC6L,IQGAP3,CDC25C,SKA1,PLK1,SPC24,ZWINT,DEPDC1B,BUB1,CENPF,KIF18A,CENPM,ECT2,CENPN,CDC20,KNL1,CENPH,CENPL,SGO2,CENPE,BUB1B,ZWILCH,ARHGEF39,KNTC1,RACGAP1,DIAPH1,IQGAP2,MAD2L1,PFN1,CENPI,CENPP,ITGB1,INCENP,H2BC15
REAC	Signaling by Rho GTPases	REAC:R-HSA-194315	2.2432190421560454e-14	13.649128317074618	459	293	48	10622	NUF2,CENPA,PKN3,CDCA8,KIF14,DSN1,SGO1,PRC1,KIF2C,BIRC5,AURKB,CENPK,NDC80,ARHGAP11A,ERCC6L,IQGAP3,CDC25C,SKA1,PLK1,SPC24,ZWINT,DEPDC1B,BUB1,CENPF,KIF18A,CENPM,ECT2,CENPN,CDC20,KNL1,CENPH,CENPL,SGO2,CENPE,BUB1B,ZWILCH,ARHGEF39,KNTC1,RACGAP1,DIAPH1,IQGAP2,MAD2L1,PFN1,CENPI,CENPP,ITGB1,INCENP,H2BC15
REAC	Synthesis of DNA	REAC:R-HSA-69239	4.811890407503697e-14	13.317684272429117	120	293	25	10622	MCM8,CDK2,POLA2,ORC1,CCNA2,UBE2C,PCNA,PRIM2,CDC45,CDC6,MCM2,MCM3,MCM5,RFC2,RFC3,ORC6,GINS1,CDT1,MCM4,MCM6,FEN1,RFC4,POLD3,PRIM1,GINS2
REAC	DNA Replication Pre-Initiation	REAC:R-HSA-69002	2.348571619963214e-13	12.62919619141833	85	293	21	10622	MCM8,CDK2,POLA2,ORC1,MCM10,E2F2,PRIM2,CDC45,CDC6,MCM2,MCM3,MCM5,ORC6,E2F3,CDT1,E2F1,DBF4,MCM4,MCM6,CDC7,PRIM1
REAC	DNA Repair	REAC:R-HSA-73894	2.348571619963214e-13	12.62919619141833	329	293	39	10622	CDK2,CHEK2,FANCD2,FANCC,CHEK1,CCNA2,DTL,RAD51AP1,RAD51,EXO1,BRIP1,PCNA,FANCI,TIMELESS,KPNA2,POLQ,RFC2,RAD18,PCLAF,FANCE,RFC3,UFD1,EME1,BRCA1,NEIL3,FANCB,BRCA2,CLSPN,FAAP24,UBE2T,POLH,FANCA,XRCC2,FEN1,MSH6,H2BC15,RFC4,POLD3,POLR2D
REAC	Unwinding of DNA	REAC:R-HSA-176974	4.8652237653570976e-11	10.312897180508681	12	293	9	10622	MCM8,CDC45,MCM2,MCM3,MCM5,GINS1,MCM4,MCM6,GINS2
REAC	Mitotic G2-G2/M phases	REAC:R-HSA-453274	1.4508235287429151e-10	9.838385409860038	198	293	27	10622	AURKA,WEE1,CDK2,CDK1,FOXM1,CCNB2,TPX2,GTSE1,CDC25C,CCNB1,CCNA2,PLK1,CEP152,MYBL2,HMMR,CENPF,CEP135,BORA,NEK2,HAUS8,CDC25A,E2F3,E2F1,HAUS1,CDC25B,TUBB,ODF2
REAC	Cyclin A/B1/B2 associated events during G2/M transition	REAC:R-HSA-69273	5.02450749804594e-10	9.29890650134298	25	293	11	10622	WEE1,CDK2,CDK1,FOXM1,CCNB2,CDC25C,CCNB1,CCNA2,PLK1,CDC25A,CDC25B
REAC	Homology Directed Repair	REAC:R-HSA-5693538	6.066283177354436e-10	9.217077320452663	138	293	22	10622	CDK2,CHEK1,CCNA2,RAD51AP1,RAD51,EXO1,BRIP1,PCNA,TIMELESS,POLQ,RFC2,RFC3,EME1,BRCA1,BRCA2,CLSPN,POLH,XRCC2,FEN1,H2BC15,RFC4,POLD3
REAC	DNA Double-Strand Break Repair	REAC:R-HSA-5693532	6.863272044533176e-10	9.163468786320168	167	293	24	10622	CDK2,CHEK2,CHEK1,CCNA2,RAD51AP1,RAD51,EXO1,BRIP1,PCNA,TIMELESS,KPNA2,POLQ,RFC2,RFC3,EME1,BRCA1,BRCA2,CLSPN,POLH,XRCC2,FEN1,H2BC15,RFC4,POLD3
REAC	Polo-like kinase mediated events	REAC:R-HSA-156711	1.967169083262797e-9	8.706158309744064	16	293	9	10622	WEE1,FOXM1,CCNB2,CDC25C,CCNB1,PLK1,MYBL2,CENPF,CDC25A
REAC	G2/M Transition	REAC:R-HSA-69275	3.4699784897882717e-9	8.45967321736913	196	293	25	10622	AURKA,WEE1,CDK2,CDK1,FOXM1,CCNB2,TPX2,GTSE1,CDC25C,CCNB1,CCNA2,PLK1,CEP152,MYBL2,HMMR,CENPF,CEP135,BORA,NEK2,HAUS8,CDC25A,HAUS1,CDC25B,TUBB,ODF2
REAC	HDR through Homologous Recombination (HRR)	REAC:R-HSA-5685942	6.382056990362245e-9	8.195039321971192	67	293	15	10622	CHEK1,RAD51AP1,RAD51,EXO1,BRIP1,PCNA,RFC2,RFC3,EME1,BRCA1,BRCA2,POLH,XRCC2,RFC4,POLD3
REAC	HDR through Homologous Recombination (HRR) or Single Strand Annealing (SSA)	REAC:R-HSA-5693567	1.1233438966022643e-8	7.949487269977845	132	293	20	10622	CDK2,CHEK1,CCNA2,RAD51AP1,RAD51,EXO1,BRIP1,PCNA,TIMELESS,RFC2,RFC3,EME1,BRCA1,BRCA2,CLSPN,POLH,XRCC2,H2BC15,RFC4,POLD3
REAC	Leading Strand Synthesis	REAC:R-HSA-69109	1.726533984866535e-8	7.762824868635267	14	293	8	10622	POLA2,PCNA,PRIM2,RFC2,RFC3,RFC4,POLD3,PRIM1
REAC	Polymerase switching	REAC:R-HSA-69091	1.726533984866535e-8	7.762824868635267	14	293	8	10622	POLA2,PCNA,PRIM2,RFC2,RFC3,RFC4,POLD3,PRIM1
REAC	Lagging Strand Synthesis	REAC:R-HSA-69186	2.2367486619816985e-8	7.650382813778621	20	293	9	10622	POLA2,PCNA,PRIM2,RFC2,RFC3,FEN1,RFC4,POLD3,PRIM1
REAC	G1/S-Specific Transcription	REAC:R-HSA-69205	3.838648261814277e-8	7.415821680784805	28	293	10	10622	CDK1,ORC1,PCNA,RRM2,CDC45,TK1,CDC6,CDT1,E2F1,FBXO5
REAC	E2F mediated regulation of DNA replication	REAC:R-HSA-113510	6.016125029198852e-8	7.220683146663937	22	293	9	10622	MCM8,CDK1,POLA2,ORC1,CCNB1,PRIM2,ORC6,E2F1,PRIM1
REAC	CDC6 association with the ORC:origin complex	REAC:R-HSA-68689	6.576915169509221e-8	7.181977759729863	11	293	7	10622	MCM8,ORC1,E2F2,CDC6,ORC6,E2F3,E2F1
REAC	Condensation of Prometaphase Chromosomes	REAC:R-HSA-2514853	6.576915169509221e-8	7.181977759729863	11	293	7	10622	CDK1,NCAPH,CCNB2,CCNB1,SMC4,NCAPG,NCAPD2
REAC	Extension of Telomeres	REAC:R-HSA-180786	1.7073980180680952e-7	6.767665227039091	51	293	12	10622	CDK2,POLA2,CCNA2,PCNA,PRIM2,DSCC1,RFC2,RFC3,FEN1,RFC4,POLD3,PRIM1
REAC	Deposition of new CENPA-containing nucleosomes at the centromere	REAC:R-HSA-606279	1.7073980180680952e-7	6.767665227039091	73	293	14	10622	CENPA,HJURP,CENPK,OIP5,CENPM,CENPN,KNL1,CENPH,CENPL,CENPW,MIS18A,CENPI,CENPP,H2BC15
REAC	Nucleosome assembly	REAC:R-HSA-774815	1.7073980180680952e-7	6.767665227039091	73	293	14	10622	CENPA,HJURP,CENPK,OIP5,CENPM,CENPN,KNL1,CENPH,CENPL,CENPW,MIS18A,CENPI,CENPP,H2BC15
REAC	Homologous DNA Pairing and Strand Exchange	REAC:R-HSA-5693579	2.0737852572777965e-7	6.6832362172853506	42	293	11	10622	CHEK1,RAD51AP1,RAD51,EXO1,BRIP1,RFC2,RFC3,BRCA1,BRCA2,XRCC2,RFC4
REAC	Telomere C-strand (Lagging Strand) Synthesis	REAC:R-HSA-174417	2.7818670774303863e-7	6.555663625213003	34	293	10	10622	POLA2,PCNA,PRIM2,DSCC1,RFC2,RFC3,FEN1,RFC4,POLD3,PRIM1
REAC	Polymerase switching on the C-strand of the telomere	REAC:R-HSA-174411	2.890918924730744e-7	6.538964087864378	26	293	9	10622	POLA2,PCNA,PRIM2,DSCC1,RFC2,RFC3,RFC4,POLD3,PRIM1
REAC	Transcriptional Regulation by TP53	REAC:R-HSA-3700989	2.9373825617025506e-7	6.5320394877241545	361	293	31	10622	AURKA,TP53I3,CDK2,CDK1,TPX2,BIRC5,CHEK2,AURKB,FANCD2,FANCC,CHEK1,CDC25C,CCNB1,CCNA2,EXO1,BRIP1,PCNA,FANCI,RFC2,DAXX,RFC3,BRCA1,CNOT1,E2F7,E2F1,KMT5A,BBC3,RFC4,TRIAP1,BAX,POLR2D
REAC	G0 and Early G1	REAC:R-HSA-1538133	4.0725406118030193e-7	6.39013457616764	27	293	9	10622	CDK2,CDK1,TOP2A,CCNA2,MYBL2,PCNA,CDC6,CDC25A,E2F1
REAC	Assembly of the pre-replicative complex	REAC:R-HSA-68867	5.329953282476507e-7	6.273276597587232	68	293	13	10622	MCM8,ORC1,E2F2,CDC6,MCM2,MCM3,MCM5,ORC6,E2F3,CDT1,E2F1,MCM4,MCM6
REAC	TP53 Regulates Transcription of Cell Cycle Genes	REAC:R-HSA-6791312	0.0000010587726475420442	5.975197286840842	49	293	11	10622	AURKA,CDK2,CDK1,CDC25C,CCNB1,CCNA2,PCNA,CNOT1,E2F7,E2F1,BAX
REAC	Presynaptic phase of homologous DNA pairing and strand exchange	REAC:R-HSA-5693616	0.0000010656065086590665	5.972403135521668	39	293	10	10622	CHEK1,RAD51,EXO1,BRIP1,RFC2,RFC3,BRCA1,BRCA2,XRCC2,RFC4
REAC	Kinesins	REAC:R-HSA-983189	0.0000012328118438820126	5.909103201911398	61	293	12	10622	KIF20A,KIFC1,KIF2C,KIF11,KIF4A,KIF23,KIF18A,KIF20B,CENPE,RACGAP1,KIF15,KIF6
REAC	Phosphorylation of Emi1	REAC:R-HSA-176417	0.0000013602794845663288	5.866371851824792	6	293	5	10622	CDK1,CCNB1,PLK1,CDC20,FBXO5
REAC	APC/C-mediated degradation of cell cycle proteins	REAC:R-HSA-174143	0.0000016159192953776412	5.791580333194718	88	293	14	10622	AURKA,PTTG1,CDK2,CDK1,AURKB,CCNB1,CCNA2,PLK1,UBE2C,CDC20,BUB1B,NEK2,MAD2L1,FBXO5
REAC	Regulation of mitotic cell cycle	REAC:R-HSA-453276	0.0000016159192953776412	5.791580333194718	88	293	14	10622	AURKA,PTTG1,CDK2,CDK1,AURKB,CCNB1,CCNA2,PLK1,UBE2C,CDC20,BUB1B,NEK2,MAD2L1,FBXO5
REAC	Telomere Maintenance	REAC:R-HSA-157579	0.000005747354049344319	5.2405320485700715	112	293	15	10622	CDK2,POLA2,CCNA2,PCNA,PRIM2,DSCC1,RFC2,DAXX,RFC3,FEN1,H2BC15,RFC4,POLD3,PRIM1,POLR2D
REAC	AURKA Activation by TPX2	REAC:R-HSA-8854518	0.000006406546024707821	5.193376049529227	71	293	12	10622	AURKA,CDK1,TPX2,PLK1,CEP152,HMMR,CEP135,NEK2,HAUS8,HAUS1,TUBB,ODF2
REAC	Orc1 removal from chromatin	REAC:R-HSA-68949	0.000006406546024707821	5.193376049529227	71	293	12	10622	MCM8,CDK2,ORC1,CCNA2,CDC6,MCM2,MCM3,MCM5,ORC6,CDT1,MCM4,MCM6
REAC	Regulation of PLK1 Activity at G2/M Transition	REAC:R-HSA-2565942	0.000006956986256135964	5.157578854611332	85	293	13	10622	AURKA,CDK1,CCNB2,CCNB1,PLK1,CEP152,CEP135,BORA,NEK2,HAUS8,HAUS1,TUBB,ODF2
REAC	DNA Damage Bypass	REAC:R-HSA-73893	0.000007580831421826714	5.120283160844192	48	293	10	10622	DTL,PCNA,RFC2,RAD18,PCLAF,RFC3,UFD1,POLH,RFC4,POLD3
REAC	Chk1/Chk2(Cds1) mediated inactivation of Cyclin B:Cdk1 complex	REAC:R-HSA-75035	0.000008054041291025745	5.093986148205286	13	293	6	10622	WEE1,CDK1,CHEK2,CHEK1,CDC25C,CCNB1
REAC	Fanconi Anemia Pathway	REAC:R-HSA-6783310	0.000010885098505424265	4.96316763642825	39	293	9	10622	FANCD2,FANCC,FANCI,FANCE,EME1,FANCB,FAAP24,UBE2T,FANCA
REAC	Removal of the Flap Intermediate	REAC:R-HSA-69166	0.00001336395500766734	4.8740649951676005	14	293	6	10622	POLA2,PCNA,PRIM2,FEN1,POLD3,PRIM1
REAC	Switching of origins to a post-replicative state	REAC:R-HSA-69052	0.00001443906685504404	4.8404608727497695	91	293	13	10622	MCM8,CDK2,ORC1,CCNA2,UBE2C,CDC6,MCM2,MCM3,MCM5,ORC6,CDT1,MCM4,MCM6
REAC	Regulation of TP53 Activity through Phosphorylation	REAC:R-HSA-6804756	0.000016170563934906845	4.79127483417229	92	293	13	10622	AURKA,CDK2,TPX2,CHEK2,AURKB,CHEK1,CCNA2,EXO1,BRIP1,RFC2,RFC3,BRCA1,RFC4
REAC	Processive synthesis on the lagging strand	REAC:R-HSA-69183	0.000020839477140262035	4.681113181627198	15	293	6	10622	POLA2,PCNA,PRIM2,FEN1,POLD3,PRIM1
REAC	E2F-enabled inhibition of pre-replication complex formation	REAC:R-HSA-113507	0.000021487606950759413	4.667811948675616	9	293	5	10622	MCM8,CDK1,ORC1,CCNB1,ORC6
REAC	G2/M DNA damage checkpoint	REAC:R-HSA-69473	0.00002250473485246102	4.647726099490284	95	293	13	10622	WEE1,CDK1,CHEK2,CHEK1,CDC25C,CCNB1,EXO1,BRIP1,RFC2,RFC3,BRCA1,H2BC15,RFC4
REAC	SUMOylation of DNA replication proteins	REAC:R-HSA-4615885	0.00002380268534787466	4.623374044373064	43	293	9	10622	AURKA,CDCA8,BIRC5,AURKB,TOP2A,PCNA,NUP188,INCENP,NUP93
REAC	Resolution of D-loop Structures through Holliday Junction Intermediates	REAC:R-HSA-5693568	0.00002694657166208007	4.569496481050584	33	293	8	10622	RAD51AP1,RAD51,EXO1,BRIP1,EME1,BRCA1,BRCA2,XRCC2
REAC	G2 Phase	REAC:R-HSA-68911	0.000031397718950658	4.503101902344831	5	293	4	10622	CDK2,CCNA2,E2F3,E2F1
REAC	G2/M DNA replication checkpoint	REAC:R-HSA-69478	0.000031397718950658	4.503101902344831	5	293	4	10622	WEE1,CDK1,CCNB2,CCNB1
REAC	Resolution of D-Loop Structures	REAC:R-HSA-5693537	0.000033078621197329264	4.480452601261911	34	293	8	10622	RAD51AP1,RAD51,EXO1,BRIP1,EME1,BRCA1,BRCA2,XRCC2
REAC	Resolution of D-loop Structures through Synthesis-Dependent Strand Annealing (SDSA)	REAC:R-HSA-5693554	0.000052276521988604764	4.281693314194071	26	293	7	10622	RAD51AP1,RAD51,EXO1,BRIP1,BRCA1,BRCA2,XRCC2
REAC	TP53 Regulates Transcription of Genes Involved in G2 Cell Cycle Arrest	REAC:R-HSA-6804114	0.00006395977394950965	4.1940930798328395	18	293	6	10622	AURKA,CDK1,CDC25C,CCNB1,PCNA,BAX
REAC	Translesion Synthesis by POLH	REAC:R-HSA-110320	0.0000899527363307376	4.045985621031439	19	293	6	10622	PCNA,RFC2,RFC3,UFD1,POLH,RFC4
REAC	Regulation of TP53 Activity	REAC:R-HSA-5633007	0.0000899527363307376	4.045985621031439	160	293	16	10622	AURKA,CDK2,CDK1,TPX2,CHEK2,AURKB,CHEK1,CCNA2,EXO1,BRIP1,RFC2,DAXX,RFC3,BRCA1,KMT5A,RFC4
REAC	Translesion synthesis by Y family DNA polymerases bypasses lesions on DNA template	REAC:R-HSA-110313	0.0000934288390037757	4.029519047892011	39	293	8	10622	PCNA,RFC2,PCLAF,RFC3,UFD1,POLH,RFC4,POLD3
REAC	Recognition of DNA damage by PCNA-containing replication complex	REAC:R-HSA-110314	0.0001383961101195599	3.858876116363014	30	293	7	10622	DTL,PCNA,RFC2,RAD18,RFC3,RFC4,POLD3
REAC	Processing of DNA double-strand break ends	REAC:R-HSA-5693607	0.00015505523911217716	3.8095135549405654	98	293	12	10622	CDK2,CHEK1,CCNA2,EXO1,BRIP1,TIMELESS,RFC2,RFC3,BRCA1,CLSPN,H2BC15,RFC4
REAC	PCNA-Dependent Long Patch Base Excision Repair	REAC:R-HSA-5651801	0.00016216743195901815	3.790036360609879	21	293	6	10622	PCNA,RFC2,RFC3,FEN1,RFC4,POLD3
REAC	COPI-dependent Golgi-to-ER retrograde traffic	REAC:R-HSA-6811434	0.0001843829816611518	3.7342791663178097	100	293	12	10622	KIF20A,KIFC1,KIF2C,KIF11,KIF4A,KIF23,KIF18A,KIF20B,CENPE,RACGAP1,KIF15,KIF6
REAC	Activation of NIMA Kinases NEK9, NEK6, NEK7	REAC:R-HSA-2980767	0.0001843829816611518	3.7342791663178097	7	293	4	10622	CDK1,CCNB2,CCNB1,PLK1
REAC	Termination of translesion DNA synthesis	REAC:R-HSA-5656169	0.00020597237170681977	3.686191030213238	32	293	7	10622	PCNA,RFC2,PCLAF,RFC3,POLH,RFC4,POLD3
REAC	Transcriptional Regulation by E2F6	REAC:R-HSA-8953750	0.0003105002957140583	3.507937981874124	34	293	7	10622	CHEK1,RAD51,RRM2,BRCA1,E2F1,EZH2,CDC7
REAC	Activation of APC/C and APC/C:Cdc20 mediated degradation of mitotic proteins	REAC:R-HSA-176814	0.0004481288900435796	3.3485970570196373	77	293	10	10622	PTTG1,CDK1,CCNB1,CCNA2,PLK1,UBE2C,CDC20,BUB1B,NEK2,MAD2L1
REAC	Resolution of AP sites via the multiple-nucleotide patch replacement pathway	REAC:R-HSA-110373	0.00045076004641269246	3.346054585064855	25	293	6	10622	PCNA,RFC2,RFC3,FEN1,RFC4,POLD3
REAC	Initiation of Nuclear Envelope (NE) Reformation	REAC:R-HSA-2995383	0.0004917345620773822	3.30826926579571	16	293	5	10622	CDK1,CCNB2,CCNB1,LMNB1,KPNB1
REAC	HDR through Single Strand Annealing (SSA)	REAC:R-HSA-5685938	0.0005299974333850758	3.275726233549018	37	293	7	10622	RAD51,EXO1,BRIP1,RFC2,RFC3,BRCA1,RFC4
REAC	Diseases of mitotic cell cycle	REAC:R-HSA-9675126	0.0006278289559977258	3.20215865814851	38	293	7	10622	CDK2,UBE2C,E2F2,CCND1,DAXX,E2F3,E2F1
REAC	Defective binding of RB1 mutants to E2F1,(E2F2, E2F3)	REAC:R-HSA-9661069	0.0006400331413081599	3.1937975373995364	17	293	5	10622	CDK2,E2F2,CCND1,E2F3,E2F1
REAC	Regulation of APC/C activators between G1/S and early anaphase	REAC:R-HSA-176408	0.0006400331413081599	3.1937975373995364	81	293	10	10622	CDK2,CDK1,CCNB1,CCNA2,PLK1,UBE2C,CDC20,BUB1B,MAD2L1,FBXO5
REAC	Aberrant regulation of mitotic G1/S transition in cancer due to RB1 defects	REAC:R-HSA-9659787	0.0006400331413081599	3.1937975373995364	17	293	5	10622	CDK2,E2F2,CCND1,E2F3,E2F1
REAC	SUMO E3 ligases SUMOylate target proteins	REAC:R-HSA-3108232	0.0006400331413081599	3.1937975373995364	170	293	15	10622	AURKA,CDCA8,BIRC5,AURKB,TOP2A,PCNA,NR3C2,DAXX,NSMCE2,BRCA1,DNMT1,NUP188,INCENP,CBX8,NUP93
REAC	Mitotic Prophase	REAC:R-HSA-68875	0.0007685818462896169	3.1143098776772313	135	293	13	10622	CDK1,CCNB2,CCNB1,PLK1,SMC4,MASTL,LMNB1,NCAPG2,KMT5A,NUP188,NCAPD3,H2BC15,NUP93
REAC	Loss of proteins required for interphase microtubule organization from the centrosome	REAC:R-HSA-380284	0.0008248082641010372	3.0836469963235964	68	293	9	10622	CDK1,PLK1,CEP152,CEP135,NEK2,HAUS8,HAUS1,TUBB,ODF2
REAC	Loss of Nlp from mitotic centrosomes	REAC:R-HSA-380259	0.0008248082641010372	3.0836469963235964	68	293	9	10622	CDK1,PLK1,CEP152,CEP135,NEK2,HAUS8,HAUS1,TUBB,ODF2
REAC	SUMOylation	REAC:R-HSA-2990846	0.000885737897452743	3.0526947730680556	176	293	15	10622	AURKA,CDCA8,BIRC5,AURKB,TOP2A,PCNA,NR3C2,DAXX,NSMCE2,BRCA1,DNMT1,NUP188,INCENP,CBX8,NUP93
REAC	Nuclear Envelope (NE) Reassembly	REAC:R-HSA-2995410	0.0010173287667694904	2.9925386748843255	70	293	9	10622	CDK1,CCNB2,CCNB1,LMNB1,NUP188,RCC1,RAN,NUP93,KPNB1
REAC	Transcription of E2F targets under negative control by DREAM complex	REAC:R-HSA-1362277	0.001083111945836474	2.9653266542273857	19	293	5	10622	TOP2A,PCNA,CDC6,CDC25A,E2F1
REAC	APC/C:Cdc20 mediated degradation of mitotic proteins	REAC:R-HSA-176409	0.0018925686119858807	2.722948366904921	76	293	9	10622	PTTG1,CDK1,CCNB1,CCNA2,UBE2C,CDC20,BUB1B,NEK2,MAD2L1
REAC	Cyclin D associated events in G1	REAC:R-HSA-69231	0.0019395211117692575	2.712305488724409	46	293	7	10622	CDK2,E2F2,CCND1,CKS1B,E2F3,E2F1,CDKN2C
REAC	G1 Phase	REAC:R-HSA-69236	0.0019395211117692575	2.712305488724409	46	293	7	10622	CDK2,E2F2,CCND1,CKS1B,E2F3,E2F1,CDKN2C
REAC	Factors involved in megakaryocyte development and platelet production	REAC:R-HSA-983231	0.0020309100741426785	2.692309306121652	170	293	14	10622	WEE1,CDK2,KIF20A,KIFC1,KIF2C,KIF11,KIF4A,KIF23,KIF18A,KIF20B,CENPE,RACGAP1,KIF15,KIF6
REAC	Nuclear Envelope Breakdown	REAC:R-HSA-2980766	0.0021854415405346754	2.6604608061785697	47	293	7	10622	CDK1,CCNB2,CCNB1,PLK1,LMNB1,NUP188,NUP93
REAC	Golgi-to-ER retrograde transport	REAC:R-HSA-8856688	0.0025483879545492713	2.5937344563623816	134	293	12	10622	KIF20A,KIFC1,KIF2C,KIF11,KIF4A,KIF23,KIF18A,KIF20B,CENPE,RACGAP1,KIF15,KIF6
REAC	Inhibition of replication initiation of damaged DNA by RB1/E2F1	REAC:R-HSA-113501	0.0025671915011891136	2.5905417336629344	13	293	4	10622	POLA2,PRIM2,E2F1,PRIM1
REAC	Golgi Cisternae Pericentriolar Stack Reorganization	REAC:R-HSA-162658	0.0025671915011891136	2.5905417336629344	13	293	4	10622	CDK1,CCNB2,CCNB1,PLK1
REAC	Recruitment of mitotic centrosome proteins and complexes	REAC:R-HSA-380270	0.0025792325949275286	2.5885094914647535	80	293	9	10622	CDK1,PLK1,CEP152,CEP135,NEK2,HAUS8,HAUS1,TUBB,ODF2
REAC	Centrosome maturation	REAC:R-HSA-380287	0.0025792325949275286	2.5885094914647535	80	293	9	10622	CDK1,PLK1,CEP152,CEP135,NEK2,HAUS8,HAUS1,TUBB,ODF2
REAC	Aberrant regulation of mitotic cell cycle due to RB1 defects	REAC:R-HSA-9687139	0.0030204138684911705	2.519933544298808	36	293	6	10622	CDK2,UBE2C,E2F2,CCND1,E2F3,E2F1
REAC	Resolution of Abasic Sites (AP sites)	REAC:R-HSA-73933	0.0030204138684911705	2.519933544298808	36	293	6	10622	PCNA,RFC2,RFC3,FEN1,RFC4,POLD3
REAC	Postmitotic nuclear pore complex (NPC) reformation	REAC:R-HSA-9615933	0.0031458808378196455	2.5022577319535166	24	293	5	10622	NUP188,RCC1,RAN,NUP93,KPNB1
REAC	TP53 Regulates Transcription of Genes Involved in G1 Cell Cycle Arrest	REAC:R-HSA-6804116	0.003311296788181115	2.480001892128365	14	293	4	10622	CDK2,CCNA2,E2F7,E2F1
REAC	Mismatch repair (MMR) directed by MSH2:MSH6 (MutSalpha)	REAC:R-HSA-5358565	0.003311296788181115	2.480001892128365	14	293	4	10622	EXO1,PCNA,MSH6,POLD3
REAC	Gap-filling DNA repair synthesis and ligation in GG-NER	REAC:R-HSA-5696397	0.00374917307860253	2.4260645101394087	25	293	5	10622	PCNA,RFC2,RFC3,RFC4,POLD3
REAC	Mismatch Repair	REAC:R-HSA-5358508	0.004345515805427852	2.3619586661300134	15	293	4	10622	EXO1,PCNA,MSH6,POLD3
REAC	APC-Cdc20 mediated degradation of Nek2A	REAC:R-HSA-179409	0.00446439750885963	2.350237142874625	26	293	5	10622	UBE2C,CDC20,BUB1B,NEK2,MAD2L1
REAC	Gene expression (Transcription)	REAC:R-HSA-74160	0.004481264846434175	2.3485993881677603	1476	293	61	10622	AURKA,TP53I3,CDK2,CDK1,TPX2,BIRC5,CHEK2,AURKB,FANCD2,FANCC,CHEK1,CDC25C,CCNB1,CCNA2,UBE2C,MYBL2,SNRPB,RAD51,ATAD2,EXO1,BRIP1,PCNA,RRM2,CBFB,FANCI,CAV1,POLR1H,CCND1,PPM1D,SREBF1,NR2C2AP,RFC2,DAXX,ITGA5,DEK,RFC3,BRCA1,CNOT1,E2F7,DNMT1,E2F1,TEAD4,EZH2,KMT5A,SMARCE1,BBC3,NUP188,POLR3D,DDX39A,CDC7,JAG1,H2BC15,RFC4,TRIAP1,CLP1,CBX8,INTS7,BAX,POLR2D,RAN,NUP93
REAC	Mitotic Metaphase/Anaphase Transition	REAC:R-HSA-68881	0.005284293216522276	2.277013092120236	2	293	2	10622	PLK1,FBXO5
REAC	Transcription of E2F targets under negative control by p107 (RBL1) and p130 (RBL2) in complex with HDAC1	REAC:R-HSA-1362300	0.0054458803117469696	2.2639319077112647	16	293	4	10622	CDK1,CCNA2,MYBL2,E2F1
REAC	Translesion synthesis by REV1	REAC:R-HSA-110312	0.0054458803117469696	2.2639319077112647	16	293	4	10622	PCNA,RFC2,RFC3,RFC4
REAC	Condensation of Prophase Chromosomes	REAC:R-HSA-2299718	0.005880977536774945	2.230550479443961	73	293	8	10622	CDK1,CCNB1,PLK1,SMC4,NCAPG2,KMT5A,NCAPD3,H2BC15
REAC	Diseases of programmed cell death	REAC:R-HSA-9645723	0.006079323306259687	2.216144759660322	28	293	5	10622	CDC25C,LMNB1,CDC25A,CDC25B,C1QBP
REAC	Translesion synthesis by POLK	REAC:R-HSA-5655862	0.006755332364426729	2.1703532786944204	17	293	4	10622	PCNA,RFC2,RFC3,RFC4
REAC	Translesion synthesis by POLI	REAC:R-HSA-5656121	0.006755332364426729	2.1703532786944204	17	293	4	10622	PCNA,RFC2,RFC3,RFC4
REAC	DNA replication initiation	REAC:R-HSA-68952	0.006925668126256221	2.159538323411578	8	293	3	10622	POLA2,PRIM2,PRIM1
REAC	Recruitment of NuMA to mitotic centrosomes	REAC:R-HSA-380320	0.007311983866683534	2.1359647755097346	94	293	9	10622	CDK1,PLK1,CEP152,CEP135,NEK2,HAUS8,HAUS1,TUBB,ODF2
REAC	Crosslinking of collagen fibrils	REAC:R-HSA-2243919	0.008308202868684693	2.080492907457757	18	293	4	10622	PCOLCE,COL4A1,LOXL2,COL4A2
REAC	Anchoring of the basal body to the plasma membrane	REAC:R-HSA-5620912	0.008370377158837481	2.077254972793885	96	293	9	10622	CDK1,PLK1,CEP152,CEP135,NEK2,HAUS8,HAUS1,TUBB,ODF2
REAC	Nuclear import of Rev protein	REAC:R-HSA-180746	0.009317951988964679	2.03067953159776	31	293	5	10622	NUP188,RCC1,RAN,NUP93,KPNB1
REAC	RNA Polymerase II Transcription	REAC:R-HSA-73857	0.009572799353901098	2.018961043813954	1342	293	55	10622	AURKA,TP53I3,CDK2,CDK1,TPX2,BIRC5,CHEK2,AURKB,FANCD2,FANCC,CHEK1,CDC25C,CCNB1,CCNA2,UBE2C,MYBL2,SNRPB,RAD51,ATAD2,EXO1,BRIP1,PCNA,RRM2,CBFB,FANCI,CAV1,CCND1,PPM1D,SREBF1,NR2C2AP,RFC2,DAXX,ITGA5,DEK,RFC3,BRCA1,CNOT1,E2F7,E2F1,TEAD4,EZH2,KMT5A,SMARCE1,BBC3,DDX39A,CDC7,JAG1,H2BC15,RFC4,TRIAP1,CLP1,CBX8,INTS7,BAX,POLR2D
REAC	Generic Transcription Pathway	REAC:R-HSA-212436	0.009622525003275475	2.0167109517563166	1221	293	51	10622	AURKA,TP53I3,CDK2,CDK1,TPX2,BIRC5,CHEK2,AURKB,FANCD2,FANCC,CHEK1,CDC25C,CCNB1,CCNA2,UBE2C,MYBL2,RAD51,ATAD2,EXO1,BRIP1,PCNA,RRM2,CBFB,FANCI,CAV1,CCND1,PPM1D,SREBF1,NR2C2AP,RFC2,DAXX,ITGA5,DEK,RFC3,BRCA1,CNOT1,E2F7,E2F1,TEAD4,EZH2,KMT5A,SMARCE1,BBC3,CDC7,JAG1,H2BC15,RFC4,TRIAP1,CBX8,BAX,POLR2D
REAC	Phosphorylation of the APC/C	REAC:R-HSA-176412	0.01208775422047775	1.9176543790607787	20	293	4	10622	CDK1,CCNB1,PLK1,UBE2C
REAC	Nuclear Pore Complex (NPC) Disassembly	REAC:R-HSA-3301854	0.01208775422047775	1.9176543790607787	33	293	5	10622	CDK1,CCNB2,CCNB1,NUP188,NUP93
REAC	MASTL Facilitates Mitotic Progression	REAC:R-HSA-2465910	0.01333422447799082	1.8750322379211108	10	293	3	10622	CDK1,CCNB1,MASTL
REAC	Interactions of Rev with host cellular proteins	REAC:R-HSA-177243	0.013604273111360008	1.8663246580120287	34	293	5	10622	NUP188,RCC1,RAN,NUP93,KPNB1
REAC	Phosphorylation of proteins involved in the G2/M transition by Cyclin A:Cdc2 complexes	REAC:R-HSA-170145	0.013604273111360008	1.8663246580120287	3	293	2	10622	CDK1,CCNA2
REAC	Inactivation of APC/C via direct inhibition of the APC/C complex	REAC:R-HSA-141430	0.01378460137850145	1.8606057882539118	21	293	4	10622	UBE2C,CDC20,BUB1B,MAD2L1
REAC	Inhibition of the proteolytic activity of APC/C required for the onset of anaphase by mitotic spindle checkpoint components	REAC:R-HSA-141405	0.01378460137850145	1.8606057882539118	21	293	4	10622	UBE2C,CDC20,BUB1B,MAD2L1
REAC	Deregulated CDK5 triggers multiple neurodegenerative pathways in Alzheimer's disease models	REAC:R-HSA-8862803	0.01378460137850145	1.8606057882539118	21	293	4	10622	CDC25C,LMNB1,CDC25A,CDC25B
REAC	Neurodegenerative Diseases	REAC:R-HSA-8863678	0.01378460137850145	1.8606057882539118	21	293	4	10622	CDC25C,LMNB1,CDC25A,CDC25B
REAC	Cyclin A:Cdk2-associated events at S phase entry	REAC:R-HSA-69656	0.01378460137850145	1.8606057882539118	85	293	8	10622	WEE1,CDK2,CCNA2,CCND1,CKS1B,CDC25A,E2F1,CDC25B
REAC	Regulation of TP53 Degradation	REAC:R-HSA-6804757	0.016772976994924135	1.7753898486804232	36	293	5	10622	CDK2,CDK1,CHEK2,CCNA2,DAXX
REAC	Diseases of DNA repair	REAC:R-HSA-9675135	0.016772976994924135	1.7753898486804232	11	293	3	10622	BRCA1,NEIL3,MSH6
REAC	Pyrimidine salvage	REAC:R-HSA-73614	0.016772976994924135	1.7753898486804232	11	293	3	10622	TK1,UPP2,UCK2
REAC	Base Excision Repair	REAC:R-HSA-73884	0.01781634484884772	1.7491813897940547	89	293	8	10622	PCNA,RFC2,RFC3,NEIL3,FEN1,H2BC15,RFC4,POLD3
REAC	Regulation of TP53 Expression and Degradation	REAC:R-HSA-6806003	0.018570704203779473	1.7311716274386313	37	293	5	10622	CDK2,CDK1,CHEK2,CCNA2,DAXX
REAC	APC/C:Cdc20 mediated degradation of Cyclin B	REAC:R-HSA-174048	0.022040569698351206	1.6567771841554308	24	293	4	10622	CDK1,CCNB1,UBE2C,CDC20
REAC	APC:Cdc20 mediated degradation of cell cycle proteins prior to satisfation of the cell cycle checkpoint	REAC:R-HSA-179419	0.02358737057357896	1.6273204698406714	74	293	7	10622	CDK1,CCNA2,UBE2C,CDC20,BUB1B,NEK2,MAD2L1
REAC	Depolymerisation of the Nuclear Lamina	REAC:R-HSA-4419969	0.026671317475132163	1.5739555310649795	13	293	3	10622	CDK1,CCNB1,LMNB1
REAC	Mitotic Telophase/Cytokinesis	REAC:R-HSA-68884	0.026671317475132163	1.5739555310649795	13	293	3	10622	KIF20A,PLK1,KIF23
REAC	Telomere C-strand synthesis initiation	REAC:R-HSA-174430	0.026671317475132163	1.5739555310649795	13	293	3	10622	POLA2,PRIM2,PRIM1
REAC	Dual Incision in GG-NER	REAC:R-HSA-5696400	0.028092342278378347	1.5514120487597587	41	293	5	10622	PCNA,RFC2,RFC3,RFC4,POLD3
REAC	Mismatch repair (MMR) directed by MSH2:MSH3 (MutSbeta)	REAC:R-HSA-5358606	0.03284368602911777	1.4835481081825321	14	293	3	10622	EXO1,PCNA,POLD3
REAC	Glycosaminoglycan metabolism	REAC:R-HSA-1630316	0.03714022634866591	1.4301554538090266	123	293	9	10622	CHST1,HMMR,SLC26A2,HPSE2,HSPG2,SDC1,B4GALT3,LYVE1,BGN
REAC	TP53 Regulates Transcription of Cell Death Genes	REAC:R-HSA-5633008	0.03714022634866591	1.4301554538090266	44	293	5	10622	TP53I3,BIRC5,BBC3,TRIAP1,BAX
REAC	MHC class II antigen presentation	REAC:R-HSA-2132295	0.03714022634866591	1.4301554538090266	123	293	9	10622	KIF20A,KIF2C,KIF11,KIF4A,KIF23,KIF18A,CENPE,RACGAP1,KIF15
REAC	TP53 Regulates Transcription of DNA Repair Genes	REAC:R-HSA-6796648	0.04018395872593565	1.3959472809242486	63	293	6	10622	FANCD2,FANCC,CHEK1,FANCI,BRCA1,POLR2D
REAC	Gap-filling DNA repair synthesis and ligation in TC-NER	REAC:R-HSA-6782210	0.04018395872593565	1.3959472809242486	63	293	6	10622	PCNA,RFC2,RFC3,RFC4,POLD3,POLR2D
REAC	Cellular Senescence	REAC:R-HSA-2559583	0.040974748015130485	1.3874837085561174	195	293	12	10622	CDK2,CCNA2,UBE2C,HMGA1,LMNB1,E2F2,E2F3,E2F1,EZH2,H2BC15,CBX8,CDKN2C
REAC	Cyclin E associated events during G1/S transition	REAC:R-HSA-69202	0.04098129270433575	1.3874143464349435	83	293	7	10622	WEE1,CDK2,CCNA2,CCND1,CKS1B,CDC25A,E2F1
REAC	Dual incision in TC-NER	REAC:R-HSA-6782135	0.04256781680921121	1.370918623067545	64	293	6	10622	PCNA,RFC2,RFC3,RFC4,POLD3,POLR2D
REAC	Laminin interactions	REAC:R-HSA-3000157	0.0455122040182529	1.3418721324174063	30	293	4	10622	COL4A1,HSPG2,COL4A2,ITGB1
WP	Retinoblastoma Gene in Cancer	WP:WP2446	6.071927336340192e-25	24.2166734343483	88	221	32	7562	WEE1,CDK2,CDK1,CCNB2,ORC1,KIF4A,TOP2A,CHEK1,CCNB1,CCNA2,TTK,PCNA,RRM2,E2F2,CDC45,CCND1,HMGB2,MCM3,RFC3,CDC25A,E2F3,DNMT1,CDT1,E2F1,MCM4,MCM6,CDC25B,MSH6,CDC7,RFC4,POLD3,PRIM1
WP	Cell Cycle	WP:WP179	1.5929737040620096e-22	21.797791393235293	122	221	34	7562	PTTG1,WEE1,CDK2,CDK1,CCNB2,CHEK2,ORC1,CHEK1,CDC25C,CCNB1,CCNA2,PLK1,BUB1,ESPL1,TTK,PCNA,E2F2,CDC45,CDC20,CDC6,CCND1,MCM2,MCM3,MCM5,ORC6,CDC25A,E2F3,E2F1,DBF4,MCM4,MCM6,CDC25B,CDC7,CDKN2C
WP	DNA Replication	WP:WP466	1.9137793511272908e-21	20.718108135583105	42	221	22	7562	CDK2,POLA2,ORC1,MCM10,PCNA,PRIM2,CDC45,CDC6,MCM2,MCM3,MCM5,RFC2,RFC3,ORC6,CDT1,DBF4,MCM4,MCM6,CDC7,RFC4,POLD3,PRIM1
WP	G1 to S cell cycle control	WP:WP45	1.2772094124779167e-16	15.89373788955934	64	221	22	7562	WEE1,CDK2,CDK1,POLA2,ORC1,CCNB1,PCNA,E2F2,PRIM2,CDC45,CCND1,MCM2,MCM3,MCM5,ORC6,CDC25A,E2F3,E2F1,MCM4,MCM6,PRIM1,CDKN2C
WP	DNA IR-damage and cellular response via ATR	WP:WP4016	1.3950935789255978e-16	15.855396660169635	81	221	24	7562	CDK2,CDK1,FOXM1,CHEK2,FANCD2,CHEK1,CDC25C,PLK1,RAD51,EXO1,BRIP1,PCNA,CDC45,FANCI,RFWD3,PPM1D,MCM2,BRCA1,BRCA2,CLSPN,E2F1,FANCA,FEN1,SMARCAL1
WP	DNA Repair Pathways Full Network	WP:WP4946	1.5862393907268345e-10	9.799631269587042	120	221	22	7562	FANCD2,FANCC,CHEK1,RAD51,EXO1,BRIP1,PCNA,FANCI,RFC2,FANCE,RFC3,BRCA1,NEIL3,FANCB,BRCA2,FAAP24,POLH,FANCA,FEN1,MSH6,RFC4,POLD3
WP	Gastric Cancer Network 1	WP:WP2361	9.746002809395285e-9	8.01117346776442	29	221	11	7562	AURKA,TPX2,TOP2A,UBE2C,MYBL2,CENPF,ECT2,KIF20B,E2F7,KIF15,MCM4
WP	DNA Damage Response	WP:WP707	3.1884272750215814e-8	7.496423484405759	69	221	15	7562	CDK2,CDK1,CCNB2,CHEK2,FANCD2,CHEK1,CDC25C,CCNB1,RAD51,CCND1,BRCA1,CDC25A,E2F1,BBC3,BAX
WP	Integrated Cancer Pathway	WP:WP1971	1.1875929054490211e-7	6.92533240549629	45	221	12	7562	CDK2,CDK1,CHEK2,CHEK1,PLK1,BRCA1,CDC25A,E2F1,BBC3,CDC25B,MSH6,BAX
WP	miRNA Regulation of DNA Damage Response	WP:WP1530	0.0000018860037381553181	5.724457450804089	93	221	15	7562	CDK2,CDK1,CCNB2,CHEK2,FANCD2,CHEK1,CDC25C,CCNB1,RAD51,CCND1,BRCA1,CDC25A,E2F1,BBC3,BAX
WP	ATM Signaling Pathway	WP:WP2516	0.0000038114321010934908	5.4189118125811016	40	221	10	7562	CDK2,CDK1,CHEK2,FANCD2,CHEK1,CDC25C,CCNB1,RAD51,BRCA1,CDC25A
WP	Regulation of sister chromatid separation at the metaphase-anaphase transition	WP:WP4240	0.0000038114321010934908	5.4189118125811016	16	221	7	7562	PTTG1,BUB1,ESPL1,CDC20,CENPE,BUB1B,MAD2L1
WP	Gastric Cancer Network 2	WP:WP2363	0.000006430754482243278	5.191738070893421	33	221	9	7562	TOP2A,UBE2C,ATAD2,LMNB2,FANCI,DSCC1,RFC3,UBE2T,RFC4
WP	DNA IR-Double Strand Breaks (DSBs) and cellular response via ATM	WP:WP3959	0.000008624647934719239	5.064258624153751	55	221	11	7562	CHEK2,FANCD2,CHEK1,CDC25C,RAD51,EXO1,PCNA,BRCA1,BRCA2,E2F1,BAX
WP	DNA Mismatch Repair	WP:WP531	0.00005484982489261703	4.260824754566783	23	221	7	7562	EXO1,PCNA,RFC2,RFC3,MSH6,RFC4,POLD3
WP	Integrated Breast Cancer Pathway	WP:WP1984	0.0001854559646476939	3.731759194301276	154	221	16	7562	AURKA,WEE1,CDK2,CHEK2,CHEK1,PLK1,RAD51,CCND1,BRCA1,CDC25A,BRCA2,E2F1,RAD54L,CDC25B,MSH6,BAX
WP	Pyrimidine metabolism	WP:WP4022	0.0006548057590553887	3.183887509597638	86	221	11	7562	POLA2,RRM2,PRIM2,TK1,POLR1H,UCK2,POLR3D,DTYMK,POLD3,PRIM1,POLR2D
WP	Small cell lung cancer	WP:WP4658	0.0020825276168019717	2.681409230619769	98	221	11	7562	CDK2,CKS2,E2F2,CCND1,CKS1B,COL4A1,COL4A2,E2F3,E2F1,ITGB1,BAX
WP	ATM Signaling Network in Development and Disease	WP:WP3878	0.03260724199556952	1.4866859333853866	46	221	6	7562	CDK1,CHEK2,AURKB,CHEK1,BUB1,PPM1D
WP	Genotoxicity pathway	WP:WP4286	0.03442447116670224	1.4631327227093005	63	221	7	7562	TP53I3,CENPE,IKBIP,PPM1D,E2F7,H2BC15,TRIAP1
WP	Hepatitis C and Hepatocellular Carcinoma	WP:WP3646	0.04542983421378752	1.342658848044908	50	221	6	7562	BIRC5,RRM2,E2F2,CCND1,BRCA1,COL4A2
TF	Factor: E2F; motif: TTTSGCGSG; match class: 1	TF:M00939_1	2.2834040844086786e-15	14.641417226442314	1687	438	97	19917	ZNF367,AURKA,SHCBP1,CDK1,FOXM1,POLA2,CHST1,DSN1,PRC1,KIF11,MELK,ORC1,CCDC86,NDC80,CHAF1A,MCM10,CCNA2,ZWINT,SKA3,DTL,KIF18A,CKAP2L,CENPM,LMNB1,E2F2,PRIM2,CDC45,FANCI,CENPH,CENPL,TK1,CDC6,KPNA2,SF3B3,DSCC1,BORA,RFWD3,TONSL,MCM2,MND1,MCM3,MCM5,KNTC1,NR3C2,COL4A1,EGLN3,TRIM26,UBALD2,HSPG2,UFD1,SLC1A4,TMEM47,CNOT1,E2F7,COL4A2,CKAP2,CDC25A,ORAI1,E2F3,DYNLRB2,TPM4,DNMT1,NFIL3,GINS1,CDT1,CLSPN,E2F1,FBXO5…
TF	Factor: E2F; motif: NCSCGCSAAAN; match class: 1	TF:M00919_1	2.2834040844086786e-15	14.641417226442314	1542	438	92	19917	ZNF367,AURKA,SHCBP1,CDK1,FOXM1,POLA2,CHST1,DSN1,PRC1,KIF11,MELK,ORC1,CCDC86,NDC80,CHAF1A,MCM10,CCNA2,ZWINT,SKA3,DTL,KIF18A,CKAP2L,CENPM,LMNB1,E2F2,PRIM2,CDC45,FANCI,CENPH,CENPL,TK1,CDC6,SF3B3,DSCC1,BORA,RFWD3,MCM2,MND1,MCM3,MCM5,KNTC1,NR3C2,COL4A1,EGLN3,TRIM26,UBALD2,HSPG2,UFD1,SLC1A4,TMEM47,CNOT1,E2F7,COL4A2,CKAP2,CDC25A,ORAI1,E2F3,DYNLRB2,TPM4,DNMT1,GINS1,CDT1,CLSPN,E2F1,FBXO5,EZH2,KMT5A,DBF4,N…
TF	Factor: E2F-4; motif: SNGGGCGGGAANN; match class: 1	TF:M09894_1	4.412484170655814e-15	14.3553168395892	14041	438	385	19917	ZNF367,DDIAS,AURKA,NRM,HASPIN,MCM8,ASF1B,NUF2,PTTG1,TP53I3,CENPA,WEE1,PKN3,SHCBP1,CDK2,CDK1,NCAPH,CDCA8,CEP55,FOXM1,KIF14,POLA2,KIF20A,TPX2,CHST1,DSN1,SGO1,GTSE1,KIFC1,TGFB1I1,PRC1,PIMREG,NUSAP1,KIF2C,BIRC5,CHEK2,HJURP,KIF11,MELK,ORC1,AURKB,ASPM,KIF4A,SFRP2,CCDC86,FANCC,RASL10A,ARHGAP11A,TOP2A,CHAF1A,ERCC6L,CHEK1,IQGAP3,PCOLCE,CDC25C,CDCA3,CCNB1,MCM10,CCNA2,GAS1,OIP5,NTSR2,MYO1C,FKBP7,SKA1,WDR76,…
TF	Factor: E2F; motif: NKCGCGCSAAAN; match class: 1	TF:M00920_1	1.290442135543472e-13	12.889261464795114	1321	438	80	19917	ZNF367,AURKA,SHCBP1,CDK1,POLA2,DSN1,PRC1,KIF11,MELK,ORC1,NDC80,CHAF1A,MCM10,ZWINT,SKA3,DTL,KIF18A,RAD51,CKAP2L,CENPM,LMNB1,RRM2,E2F2,PRIM2,CDC45,KNL1,CENPH,CENPL,CDC6,SF3B3,DSCC1,BORA,RFWD3,MCM2,MND1,MCM3,MCM5,KNTC1,NR3C2,UBALD2,HSPG2,UFD1,SLC1A4,TMEM47,CNOT1,E2F7,CKAP2,CDC25A,ORAI1,E2F3,DYNLRB2,DNMT1,NFIL3,GINS1,CDT1,CLSPN,E2F1,FBXO5,EZH2,NUP188,POLR3D,MCM6,HELLS,N4BP1,FOXD2,TXNDC5,CDC25B,ELOVL2…
TF	Factor: E2F-4; motif: SNGGGCGGGAANN	TF:M09894	1.290442135543472e-13	12.889261464795114	16345	438	417	19917	ZNF367,DDIAS,AURKA,NRM,HASPIN,MCM8,ASF1B,NUF2,PTTG1,TP53I3,CENPA,WEE1,PKN3,SHCBP1,CDK2,CDK1,NCAPH,CDCA8,CEP55,FOXM1,KIF14,POLA2,KIF20A,TPX2,CHST1,DSN1,SGO1,CKS2,GTSE1,KIFC1,TGFB1I1,PRC1,PIMREG,NUSAP1,KIF2C,BIRC5,CHEK2,HJURP,KIF11,MELK,ORC1,AURKB,ASPM,KIF4A,SFRP2,FANCD2,CCDC86,CENPK,NDC80,FANCC,RASL10A,ARHGAP11A,TOP2A,CHAF1A,ERCC6L,CHEK1,IQGAP3,PCOLCE,CDC25C,CDCA3,CCNB1,MCM10,CCNA2,GAS1,OIP5,NTSR2…
TF	Factor: E2F; motif: TTTSGCGS; match class: 1	TF:M00426_1	1.290442135543472e-13	12.889261464795114	5892	438	211	19917	ZNF367,AURKA,HASPIN,MCM8,ASF1B,NUF2,PTTG1,CENPA,WEE1,SHCBP1,CDK1,FOXM1,POLA2,KIF20A,TPX2,CKS2,GTSE1,TGFB1I1,PRC1,HJURP,KIF11,MELK,ORC1,SFRP2,CCDC86,NDC80,FANCC,ARHGAP11A,CHAF1A,CHEK1,IQGAP3,MCM10,CCNA2,MYO1C,SKA1,ZWINT,SMC4,SKA3,DTL,CDCA5,MASTL,MYBL2,MGME1,PIM1,RIOK1,SNRPB,KIF18A,RAD51,CKAP2L,TTK,PBK,EXO1,ZDHHC5,CENPM,LMNB1,PCNA,ECT2,E2F2,PRIM2,C5ORF34,CDC45,CDC20,KNL1,FANCI,CENPH,CENPL,FRMD8,SLC…
TF	Factor: E2F; motif: TTTSGCGS; match class: 1	TF:M00427_1	1.7711897408765484e-13	12.75173491198794	3878	438	158	19917	ZNF367,AURKA,MCM8,WEE1,SHCBP1,CDK1,FOXM1,POLA2,KIF20A,GTSE1,TGFB1I1,PRC1,KIF11,MELK,ORC1,CCDC86,NDC80,FANCC,ARHGAP11A,CHAF1A,CHEK1,MCM10,CCNA2,ZWINT,SMC4,SKA3,DTL,CDCA5,MASTL,MYBL2,MGME1,PIM1,SNRPB,KIF18A,CKAP2L,TTK,ZDHHC5,CENPM,LMNB1,PCNA,ECT2,CENPN,E2F2,PRIM2,CDC45,KNL1,FANCI,CENPH,CENPL,FRMD8,TK1,CDC6,TIMELESS,CAV1,KPNA2,POLR1H,SF3B3,BUB1B,WDR62,ZWILCH,DSCC1,BORA,RFWD3,PPM1D,MCM2,MND1,NR2C2AP,…
TF	Factor: E2F; motif: TTTSGCGSG; match class: 1	TF:M00918_1	2.801019269079661e-13	12.552683903519815	1270	438	77	19917	ZNF367,AURKA,CDK1,FOXM1,POLA2,CHST1,PRC1,KIF11,MELK,NDC80,ARHGAP11A,CHAF1A,MCM10,CCNA2,SKA3,DTL,KIF18A,CKAP2L,ZDHHC5,LMNB1,E2F2,PRIM2,CDC45,FANCI,CENPH,CENPL,CDC6,SF3B3,DSCC1,RFWD3,MCM2,MND1,MCM3,MCM5,NR3C2,TRIM26,NIP7,UBALD2,RFC3,UFD1,SLC1A4,TMEM47,CNOT1,E2F7,CKAP2,CDC25A,ORAI1,E2F3,DYNLRB2,DNMT1,GINS1,CDT1,CLSPN,E2F1,FBXO5,EZH2,KMT5A,DBF4,NUP188,POLR3D,MCM6,HELLS,N4BP1,FOXD2,CDC25B,NIBAN2,DTYMK…
TF	Factor: E2F-3:HES-7; motif: NNNSGCGCSNNNNNCRCGYGNN; match class: 1	TF:M08526_1	9.715701163889023e-13	12.012525851716836	15130	438	397	19917	ZNF367,DDIAS,AURKA,HASPIN,MCM8,ASF1B,NUF2,PTTG1,TP53I3,CENPA,WEE1,PKN3,SHCBP1,CDK2,CDK1,NCAPH,CDCA8,CEP55,FOXM1,KIF14,CCNB2,POLA2,KIF20A,CHST1,DSN1,SGO1,CKS2,GTSE1,KIFC1,TGFB1I1,PRC1,PIMREG,NUSAP1,KIF2C,BIRC5,CHEK2,HJURP,KIF11,MELK,ORC1,AURKB,ASPM,KIF4A,SFRP2,FANCD2,CCDC86,CENPK,NDC80,FANCC,RASL10A,ARHGAP11A,TOP2A,CHAF1A,ERCC6L,CHEK1,IQGAP3,PCOLCE,CDC25C,CDCA3,CCNB1,MCM10,CCNA2,GAS1,OIP5,NTSR2,MY…
TF	Factor: ZF5; motif: GGSGCGCGS; match class: 1	TF:M10438_1	2.4719554889227136e-12	11.60695935360316	15001	438	394	19917	ZNF367,DDIAS,AURKA,NRM,HASPIN,ASF1B,NUF2,PTTG1,TP53I3,CENPA,WEE1,PKN3,SHCBP1,CDK2,CDK1,NCAPH,CDCA8,CEP55,FOXM1,KIF14,CCNB2,POLA2,KIF20A,TPX2,CHST1,DSN1,CKS2,GTSE1,KIFC1,TGFB1I1,PRC1,PIMREG,NUSAP1,KIF2C,BIRC5,CHEK2,HJURP,KIF11,MELK,ORC1,AURKB,ASPM,KIF4A,SFRP2,FANCD2,CCDC86,CENPK,NDC80,FANCC,RASL10A,ARHGAP11A,TOP2A,CHAF1A,ERCC6L,CHEK1,IQGAP3,PCOLCE,CDC25C,CDCA3,CCNB1,MCM10,CCNA2,GAS1,OIP5,NTSR2,MYO…
TF	Factor: E2F-1; motif: TTTSGCGCGMNR; match class: 1	TF:M00516_1	3.2727358299241998e-12	11.485089048843049	2093	438	102	19917	ZNF367,AURKA,SHCBP1,CDK1,FOXM1,POLA2,KIFC1,HJURP,KIF11,ORC1,CCDC86,NDC80,FANCC,ARHGAP11A,CHAF1A,CHEK1,MCM10,ZWINT,SKA3,DTL,KIF18A,RAD51,CKAP2L,ATAD2,ZDHHC5,LMNB1,RRM2,E2F2,CDC45,KNL1,CENPH,CENPL,CDC6,TIMELESS,KPNA2,SF3B3,DSCC1,BORA,RFWD3,HMGB2,MCM2,MND1,MCM3,MCM5,C18ORF54,KNTC1,NR3C2,DAXX,PCLAF,COL4A1,EGLN3,TRIM26,UBALD2,HSPG2,RFC3,UFD1,SLC1A4,TMEM47,CNOT1,E2F7,ORC6,COL4A2,CKAP2,CDC25A,NEIL3,ORAI…
TF	Factor: E2F; motif: TTTCGCGC; match class: 1	TF:M00425_1	3.2727358299241998e-12	11.485089048843049	5407	438	194	19917	ZNF367,AURKA,MCM8,ASF1B,SHCBP1,CDK1,CDCA8,FOXM1,POLA2,KIF20A,DSN1,CKS2,GTSE1,KIFC1,TGFB1I1,PRC1,KIF11,MELK,ORC1,CCDC86,NDC80,ARHGAP11A,CHAF1A,CHEK1,CCNB1,MCM10,CCNA2,SKA1,SPC24,ZWINT,SMC4,SKA3,DTL,NCAPG,MASTL,MYBL2,HMMR,MGME1,RIOK1,SNRPB,KIF18A,RAD51,CKAP2L,TTK,PBK,EXO1,ZDHHC5,CENPM,NCAPD2,LMNB1,PCNA,ECT2,RRM2,CENPN,E2F2,PRIM2,C5ORF34,CDC45,CDC20,KNL1,FANCI,CENPH,CENPL,FRMD8,TK1,CDC6,TIMELESS,CAV…
TF	Factor: E2F-4; motif: NTTTCSCGCC	TF:M07380	4.314538018051987e-12	11.365065699821773	13143	438	361	19917	ZNF367,DDIAS,AURKA,NRM,HASPIN,MCM8,ASF1B,NUF2,PTTG1,TP53I3,CENPA,WEE1,PKN3,SHCBP1,CDK2,CDK1,NCAPH,CDCA8,CEP55,FOXM1,KIF14,POLA2,KIF20A,TPX2,CHST1,DSN1,SGO1,GTSE1,KIFC1,TGFB1I1,PRC1,PIMREG,NUSAP1,BIRC5,CHEK2,KIF11,MELK,ORC1,AURKB,ASPM,KIF4A,SFRP2,FANCD2,CCDC86,CENPK,NDC80,FANCC,RASL10A,TOP2A,CHAF1A,ERCC6L,CHEK1,IQGAP3,PCOLCE,CDC25C,CDCA3,CCNB1,MCM10,CCNA2,GAS1,OIP5,NTSR2,MYO1C,FKBP7,SKA1,WDR76,PLK…
TF	Factor: E2F-1; motif: NGGGCGGGARV; match class: 1	TF:M07206_1	3.12223287066241e-11	10.505534708361349	10947	438	316	19917	ZNF367,DDIAS,AURKA,NRM,HASPIN,MCM8,ASF1B,NUF2,PTTG1,TP53I3,CENPA,WEE1,PKN3,SHCBP1,CDK2,CDK1,NCAPH,CDCA8,CEP55,FOXM1,POLA2,TPX2,CHST1,GTSE1,PRC1,PIMREG,NUSAP1,CHEK2,HJURP,MELK,ORC1,KIF4A,SFRP2,FANCD2,CENPK,FANCC,RASL10A,TOP2A,CHAF1A,ERCC6L,CHEK1,IQGAP3,PCOLCE,CDC25C,CDCA3,CCNB1,MCM10,GAS1,OIP5,NTSR2,MYO1C,FKBP7,WDR76,PLK1,CEP152,DEPDC1B,SMC4,UBE2C,SKA3,DTL,NCAPG,CDCA5,MASTL,MYBL2,MKI67,TRIP13,ESCO…
TF	Factor: E2F-1; motif: NNNSSCGCSAANN	TF:M07250	3.262234328163728e-11	10.486484846553447	10809	438	313	19917	ZNF367,AURKA,HASPIN,MCM8,ASF1B,NUF2,TP53I3,CENPA,WEE1,SHCBP1,CDK1,CDCA8,CEP55,FOXM1,POLA2,KIF20A,TPX2,CHST1,DSN1,SGO1,CKS2,GTSE1,KIFC1,TGFB1I1,PRC1,PIMREG,NUSAP1,HJURP,KIF11,MELK,ORC1,ASPM,KIF4A,SFRP2,CCDC86,CENPK,NDC80,FANCC,RASL10A,ARHGAP11A,CHAF1A,ERCC6L,CHEK1,IQGAP3,CDC25C,CDCA3,CCNB1,MCM10,CCNA2,GAS1,OIP5,MYO1C,FKBP7,WDR76,PLK1,CEP152,SPC24,ZWINT,DEPDC1B,SMC4,SKA3,DTL,NCAPG,CDCA5,MASTL,MYBL2…
TF	Factor: Rb:E2F-1:DP-1; motif: TTTSGCGC; match class: 1	TF:M00740_1	3.262234328163728e-11	10.486484846553447	4638	438	171	19917	ZNF367,AURKA,MCM8,WEE1,SHCBP1,CDK1,FOXM1,POLA2,GTSE1,KIFC1,TGFB1I1,PRC1,KIF11,ORC1,CCDC86,NDC80,FANCC,ARHGAP11A,CHAF1A,CHEK1,CCNB1,MCM10,CCNA2,SKA1,SPC24,ZWINT,SMC4,SKA3,DTL,NCAPG,CDCA5,MASTL,MYBL2,MKI67,HMMR,MGME1,PIM1,SNRPB,KIF18A,RAD51,ATAD2,TTK,EXO1,ZDHHC5,CENPM,LMNB1,PCNA,RRM2,KIF20B,E2F2,PRIM2,C5ORF34,CDC45,CDC20,KNL1,FANCI,CENPH,CENPL,GEMIN6,CDC6,TIMELESS,CAV1,VKORC1,DAP3,KPNA2,POLR1H,SF3B…
TF	Factor: E2F; motif: TTTSGCGSG	TF:M00918	3.863867923047872e-11	10.412977727306194	5634	438	196	19917	ZNF367,AURKA,HASPIN,MCM8,TP53I3,WEE1,SHCBP1,CDK1,CDCA8,FOXM1,POLA2,CHST1,DSN1,GTSE1,KIFC1,TGFB1I1,PRC1,NUSAP1,CHEK2,KIF11,MELK,ORC1,CCDC86,CENPK,NDC80,FANCC,ARHGAP11A,CHAF1A,CHEK1,IQGAP3,CCNB1,MCM10,CCNA2,OIP5,MYO1C,SKA1,WDR76,CEP152,SPC24,ZWINT,SMC4,SKA3,DTL,CDCA5,MYBL2,HMMR,PIM1,KIF18A,RAD51,CKAP2L,ATAD2,PBK,EXO1,ZDHHC5,CENPM,NCAPD2,LMNB1,ECT2,RRM2,KIF20B,CENPN,E2F2,PRIM2,CDC45,CDC20,FANCI,CENP…
TF	Factor: ZF5; motif: GGSGCGCGS	TF:M10438	5.5906697343807176e-11	10.252536162681862	16373	438	412	19917	ZNF367,DDIAS,AURKA,NRM,HASPIN,MCM8,ASF1B,NUF2,PTTG1,TP53I3,CENPA,WEE1,PKN3,SHCBP1,CDK2,CDK1,NCAPH,CDCA8,CEP55,FOXM1,KIF14,CCNB2,POLA2,KIF20A,TPX2,CHST1,DSN1,SGO1,CKS2,GTSE1,KIFC1,TGFB1I1,PRC1,PIMREG,NUSAP1,KIF2C,BIRC5,CHEK2,HJURP,KIF11,MELK,ORC1,AURKB,ASPM,KIF4A,SFRP2,FANCD2,CCDC86,CENPK,NDC80,FANCC,RASL10A,ARHGAP11A,TOP2A,CHAF1A,ERCC6L,CHEK1,IQGAP3,PCOLCE,CDC25C,CDCA3,CCNB1,MCM10,CCNA2,GAS1,OIP5…
TF	Factor: E2F; motif: TTTSGCGSG	TF:M00939	7.343651116757731e-11	10.134087963841953	6496	438	216	19917	ZNF367,AURKA,HASPIN,MCM8,TP53I3,WEE1,SHCBP1,CDK1,CDCA8,FOXM1,POLA2,CHST1,DSN1,CKS2,GTSE1,KIFC1,TGFB1I1,PRC1,NUSAP1,CHEK2,HJURP,KIF11,MELK,ORC1,CCDC86,CENPK,NDC80,FANCC,RASL10A,ARHGAP11A,CHAF1A,ERCC6L,CHEK1,IQGAP3,CCNB1,MCM10,CCNA2,OIP5,MYO1C,WDR76,SPC24,ZWINT,SKA3,DTL,NCAPG,CDCA5,MASTL,MYBL2,PIM1,KIF18A,RAD51,CKAP2L,ATAD2,TTK,PBK,EXO1,ZDHHC5,CENPM,NCAPD2,LMNB1,PCNA,ECT2,RRM2,KIF20B,CENPN,E2F2,PRI…
TF	Factor: E2F-1; motif: TTTSGCGS; match class: 1	TF:M00431_1	1.1647559796821186e-10	9.933765051271429	2297	438	104	19917	ZNF367,AURKA,CDK1,FOXM1,POLA2,KIF20A,KIF11,ORC1,CCDC86,NDC80,FANCC,CHAF1A,CHEK1,MCM10,ZWINT,SMC4,SKA3,DTL,CDCA5,PIM1,SNRPB,KIF18A,TTK,ZDHHC5,CENPM,LMNB1,PCNA,ECT2,CENPN,E2F2,CDC45,FANCI,CENPH,CENPL,TK1,CDC6,TIMELESS,KPNA2,SF3B3,WDR62,BORA,PPM1D,MCM2,MND1,NR2C2AP,MCM3,MCM5,RNASEH2A,NR3C2,DAXX,PCLAF,COL4A1,EGLN3,TRIM26,UBALD2,RFC3,UFD1,PFN1,SLC1A4,CNOT1,E2F7,COL4A2,CDC25A,ORAI1,E2F3,PLSCR3,DYNLRB2,…
TF	Factor: ZF5; motif: GSGCGCGR	TF:M00716	1.8207421284865073e-10	9.739751558930887	16245	438	409	19917	ZNF367,DDIAS,AURKA,NRM,HASPIN,MCM8,ASF1B,NUF2,PTTG1,TP53I3,CENPA,WEE1,PKN3,SHCBP1,CDK2,CDK1,NCAPH,CDCA8,CEP55,FOXM1,KIF14,CCNB2,POLA2,KIF20A,TPX2,CHST1,DSN1,SGO1,CKS2,GTSE1,KIFC1,TGFB1I1,PRC1,PIMREG,NUSAP1,KIF2C,BIRC5,CHEK2,HJURP,KIF11,MELK,ORC1,AURKB,ASPM,KIF4A,SFRP2,FANCD2,CCDC86,CENPK,NDC80,FANCC,RASL10A,ARHGAP11A,TOP2A,CHAF1A,ERCC6L,CHEK1,IQGAP3,PCOLCE,CDC25C,CDCA3,CCNB1,MCM10,CCNA2,GAS1,OIP5…
TF	Factor: IRX-1; motif: NACRYNNNNNNNNRYGNN; match class: 1	TF:M11018_1	2.99486898185421e-10	9.523622172173619	16079	438	406	19917	ZNF367,DDIAS,AURKA,NRM,HASPIN,MCM8,ASF1B,NUF2,PTTG1,TP53I3,CENPA,WEE1,PKN3,SHCBP1,CDK2,NCAPH,CDCA8,CEP55,FOXM1,KIF14,CCNB2,POLA2,KIF20A,TPX2,CHST1,DSN1,SGO1,CKS2,GTSE1,KIFC1,TGFB1I1,PRC1,PIMREG,NUSAP1,KIF2C,BIRC5,CHEK2,HJURP,KIF11,MELK,ORC1,AURKB,ASPM,KIF4A,SFRP2,FANCD2,CCDC86,CENPK,NDC80,FANCC,RASL10A,ARHGAP11A,CHAF1A,ERCC6L,CHEK1,CDC25C,CDCA3,CCNB1,MCM10,CCNA2,GAS1,OIP5,NTSR2,MYO1C,FKBP7,SKA1,W…
TF	Factor: E2F-1:DP-2; motif: TTTSSCGC; match class: 1	TF:M00737_1	4.2459655751566213e-10	9.372023531267553	2968	438	122	19917	ZNF367,DDIAS,NRM,HASPIN,MCM8,ASF1B,CENPA,WEE1,PKN3,SHCBP1,CDK1,FOXM1,TPX2,GTSE1,TGFB1I1,NUSAP1,CHEK2,KIF4A,FANCC,CHEK1,OIP5,SKA3,DTL,NCAPG,MASTL,MKI67,CENPF,PIM1,SNRPB,RAD51,EXO1,CENPM,LMNB1,PCNA,RRM2,KIF20B,CENPN,E2F2,PRIM2,KNL1,FANCI,CENPH,SLC26A2,TIMELESS,SF3B3,WDR62,BORA,RFWD3,PPM1D,SREBF1,MCM2,CDCA4,MCM3,EIF4A1,MCM5,RNASEH2A,MIS18A,LRR1,NR3C2,PCLAF,MXD3,C16ORF87,DEK,TRIM26,HAUS8,DLGAP5,RFC3,…
TF	Factor: E2F-4:DP-2; motif: TTTCSCGC; match class: 1	TF:M00739_1	4.817618040531408e-10	9.317167635525983	1199	438	67	19917	ZNF367,AURKA,NRM,ASF1B,WEE1,PKN3,SHCBP1,NUSAP1,FANCC,CHEK1,OIP5,SKA3,DTL,MASTL,PIM1,SNRPB,CENPM,KIF20B,CENPN,E2F2,SF3B3,WDR62,BORA,PPM1D,SREBF1,MCM2,MCM3,EIF4A1,MCM5,RNASEH2A,LRR1,NR3C2,PCLAF,MXD3,DEK,TRIM26,HAUS8,DLGAP5,RFC3,PFN1,E2F7,CDC25A,BLOC1S5,DDX19B,DNMT1,CDT1,CLSPN,E2F1,EZH2,RAD54L,KMT5A,DBF4,AFAP1L1,MCM4,NEMP1,MCM6,HELLS,NIBAN2,ELOVL2,MSH6,CDC7,TMPO,RFC4,INTS7,CYP46A1,GINS2,PPM1G
TF	Factor: E2F-8; motif: NNTTCCCGCCAAAW	TF:M11537	6.651105656009155e-10	9.177106153134531	526	438	41	19917	WEE1,SHCBP1,SFRP2,FANCD2,CHAF1A,CHEK1,CDCA3,WDR76,CEP152,MASTL,PIM1,RAD51,ATAD2,CDC45,CENPH,CDC6,TIMELESS,POLQ,PPM1D,MCM3,RFC2,KNTC1,LRR1,DAXX,HSPG2,UFD1,PFN1,DDX19B,CDT1,FBXO5,UCK2,EZH2,RAD54L,CCT6A,MCM4,FANCA,XRCC2,MSH6,RFC4,PRIM1,GINS2
TF	Factor: E2F-4:DP-1; motif: TTTSGCGC; match class: 1	TF:M00738_1	6.651105656009155e-10	9.177106153134531	4050	438	151	19917	ZNF367,AURKA,WEE1,CDK1,CDCA8,FOXM1,POLA2,SGO1,GTSE1,KIFC1,TGFB1I1,KIF11,ORC1,CCDC86,CENPK,NDC80,FANCC,ARHGAP11A,CHAF1A,CHEK1,MCM10,CCNA2,SPC24,ZWINT,SMC4,SKA3,DTL,NCAPG,CDCA5,MASTL,MYBL2,HMMR,PIM1,SNRPB,KIF18A,RAD51,EXO1,ZDHHC5,CENPM,LMNB1,PCNA,RRM2,E2F2,CDC45,KNL1,FANCI,CENPH,CENPL,GEMIN6,CDC6,TIMELESS,CAV1,VKORC1,DAP3,KPNA2,SF3B3,WDR62,BORA,RFWD3,CKS1B,PPM1D,MCM2,MND1,JPT1,NR2C2AP,MCM3,EIF4A1,M…
TF	Factor: E2F; motif: TTTSGCGS	TF:M00427	1.056976907313715e-9	8.97593450099511	9597	438	282	19917	ZNF367,AURKA,HASPIN,MCM8,ASF1B,NUF2,TP53I3,CENPA,WEE1,SHCBP1,CDK1,CDCA8,CEP55,FOXM1,POLA2,KIF20A,TPX2,CHST1,DSN1,CKS2,GTSE1,KIFC1,TGFB1I1,PRC1,NUSAP1,CHEK2,HJURP,KIF11,MELK,ORC1,KIF4A,FANCD2,CCDC86,CENPK,NDC80,FANCC,RASL10A,ARHGAP11A,CHAF1A,ERCC6L,CHEK1,IQGAP3,CDC25C,CCNB1,MCM10,CCNA2,OIP5,SKA1,WDR76,PLK1,CEP152,SPC24,ZWINT,DEPDC1B,SMC4,SKA3,DTL,CDCA5,MASTL,MYBL2,HMMR,MGME1,CENPF,PIM1,HMGA1,SNRPB…
TF	Factor: E2F; motif: NCSCGCSAAAN	TF:M00919	1.7563304896797866e-9	8.755393759307271	6208	438	204	19917	ZNF367,AURKA,HASPIN,MCM8,TP53I3,WEE1,SHCBP1,CDK1,FOXM1,POLA2,CHST1,DSN1,CKS2,GTSE1,KIFC1,TGFB1I1,PRC1,NUSAP1,CHEK2,KIF11,MELK,ORC1,CCDC86,CENPK,NDC80,FANCC,RASL10A,ARHGAP11A,CHAF1A,ERCC6L,CHEK1,IQGAP3,CCNB1,MCM10,CCNA2,OIP5,WDR76,SPC24,ZWINT,SKA3,DTL,NCAPG,CDCA5,MASTL,MYBL2,PIM1,KIF18A,RAD51,CKAP2L,ATAD2,PBK,EXO1,ZDHHC5,CENPM,NCAPD2,LMNB1,PCNA,ECT2,RRM2,KIF20B,CENPN,E2F2,PRIM2,C5ORF34,CDC45,CDC20…
TF	Factor: E2F1; motif: NNNNNGCGSSAAAN	TF:M08874	1.7924429269934269e-9	8.746554663769746	7267	438	229	19917	ZNF367,AURKA,NRM,MCM8,ASF1B,NUF2,CENPA,WEE1,PKN3,CDK1,CDCA8,FOXM1,POLA2,KIF20A,DSN1,SGO1,CKS2,KIFC1,TGFB1I1,NUSAP1,CHEK2,HJURP,KIF11,MELK,ORC1,AURKB,SFRP2,FANCD2,CENPK,FANCC,RASL10A,ARHGAP11A,CHEK1,IQGAP3,CDC25C,CDCA3,CCNB1,CCNA2,GAS1,OIP5,SKA1,WDR76,SPC24,ZWINT,UBE2C,SKA3,DTL,CDCA5,MASTL,MYBL2,TRIP13,ESCO2,ESPL1,HMMR,MGME1,PIM1,HMGA1,SNRPB,POC1A,ATAD2,TTK,PBK,EXO1,ZDHHC5,CENPM,LMNB1,PCNA,RRM2,KI…
TF	Factor: pax-6; motif: NYACGCNYSANYGMNCN	TF:M11882	1.936791419580824e-9	8.712917147583752	15642	438	397	19917	ZNF367,DDIAS,AURKA,NRM,HASPIN,MCM8,ASF1B,NUF2,PTTG1,TP53I3,CENPA,WEE1,PKN3,SHCBP1,CDK2,CDK1,NCAPH,CDCA8,CEP55,FOXM1,KIF14,CCNB2,POLA2,CHST1,DSN1,GTSE1,KIFC1,TGFB1I1,PRC1,PIMREG,NUSAP1,KIF2C,CHEK2,HJURP,KIF11,MELK,ORC1,AURKB,ASPM,KIF4A,SFRP2,CCDC86,CENPK,FANCC,RASL10A,ARHGAP11A,TOP2A,CHAF1A,ERCC6L,CHEK1,IQGAP3,PCOLCE,TROAP,CDC25C,CDCA3,CCNB1,CCNA2,GAS1,OIP5,NTSR2,MYO1C,FKBP7,SKA1,WDR76,PLK1,CEP152…
TF	Factor: Egr-1; motif: GCGCATGCG; match class: 1	TF:M04869_1	2.1988887556760133e-9	8.657796741543317	10315	438	296	19917	ZNF367,AURKA,NRM,HASPIN,NUF2,CENPA,WEE1,PKN3,CDK2,CDK1,NCAPH,CEP55,FOXM1,KIF14,CCNB2,POLA2,KIF20A,TPX2,CHST1,DSN1,SGO1,CKS2,GTSE1,KIFC1,TGFB1I1,PRC1,PIMREG,NUSAP1,KIF2C,CHEK2,KIF11,MELK,ASPM,SFRP2,CCDC86,NDC80,FANCC,RASL10A,CHAF1A,ERCC6L,CHEK1,CDC25C,CDCA3,CCNB1,MCM10,CCNA2,GAS1,OIP5,NTSR2,SKA1,SPC24,ZWINT,DEPDC1B,SMC4,UBE2C,SKA3,DTL,NCAPG,MASTL,MYBL2,MKI67,TRIP13,ESCO2,HMMR,CENPF,PIM1,RIOK1,CEP1…
TF	Factor: E2F-1; motif: NNNNGGCGGGAARN	TF:M09892	2.5372340119152985e-9	8.595639475467808	13661	438	362	19917	ZNF367,DDIAS,AURKA,NRM,HASPIN,MCM8,ASF1B,NUF2,TP53I3,CENPA,WEE1,PKN3,SHCBP1,CDK2,CDK1,NCAPH,CDCA8,CEP55,FOXM1,POLA2,TPX2,CHST1,DSN1,SGO1,GTSE1,KIFC1,TGFB1I1,PRC1,PIMREG,NUSAP1,KIF2C,BIRC5,CHEK2,HJURP,KIF11,MELK,ORC1,AURKB,KIF4A,SFRP2,FANCD2,CCDC86,CENPK,FANCC,RASL10A,TOP2A,CHAF1A,ERCC6L,CHEK1,IQGAP3,PCOLCE,CDC25C,CDCA3,CCNB1,MCM10,CCNA2,GAS1,OIP5,NTSR2,MYO1C,FKBP7,SKA1,WDR76,PLK1,CEP152,SPC24,DEP…
TF	Factor: E2F; motif: NKCGCGCSAAAN	TF:M00920	3.1334445175589786e-9	8.50397799074582	5719	438	191	19917	ZNF367,AURKA,HASPIN,MCM8,TP53I3,WEE1,SHCBP1,CDK1,FOXM1,POLA2,CHST1,DSN1,CKS2,GTSE1,KIFC1,TGFB1I1,PRC1,NUSAP1,CHEK2,KIF11,MELK,ORC1,CCDC86,CENPK,NDC80,FANCC,ARHGAP11A,CHAF1A,ERCC6L,CHEK1,IQGAP3,CCNB1,MCM10,CCNA2,OIP5,SKA1,WDR76,SPC24,ZWINT,SKA3,DTL,NCAPG,CDCA5,MASTL,MYBL2,PIM1,KIF18A,RAD51,CKAP2L,ATAD2,PBK,EXO1,ZDHHC5,CENPM,LMNB1,PCNA,ECT2,RRM2,KIF20B,E2F2,PRIM2,CDC45,CDC20,KNL1,FANCI,CENPH,CENPL,…
TF	Factor: E2F-2; motif: GCGCGCGCGYW; match class: 1	TF:M11531_1	3.827735163421111e-9	8.41705811818978	12431	438	338	19917	ZNF367,AURKA,NRM,HASPIN,ASF1B,NUF2,PTTG1,CENPA,WEE1,PKN3,CDK1,NCAPH,CDCA8,CEP55,FOXM1,KIF14,POLA2,KIF20A,TPX2,CHST1,DSN1,CKS2,GTSE1,KIFC1,TGFB1I1,PRC1,PIMREG,NUSAP1,KIF2C,BIRC5,CHEK2,HJURP,MELK,ORC1,AURKB,ASPM,KIF4A,SFRP2,CCDC86,CENPK,NDC80,FANCC,RASL10A,ARHGAP11A,CHAF1A,ERCC6L,CHEK1,CDC25C,MCM10,CCNA2,GAS1,OIP5,NTSR2,MYO1C,WDR76,PLK1,CEP152,ZWINT,DEPDC1B,SMC4,SKA3,DTL,BUB1,NCAPG,CDCA2,CDCA5,MAST…
TF	Factor: E2F-1; motif: TTTSGCGS	TF:M00431	4.1029812310799245e-9	8.386900469690914	7333	438	229	19917	ZNF367,AURKA,MCM8,ASF1B,CENPA,WEE1,SHCBP1,CDK1,CDCA8,FOXM1,POLA2,KIF20A,TPX2,CHST1,CKS2,TGFB1I1,PRC1,NUSAP1,HJURP,KIF11,MELK,ORC1,FANCD2,CCDC86,CENPK,NDC80,FANCC,RASL10A,ARHGAP11A,CHAF1A,ERCC6L,CHEK1,IQGAP3,CDC25C,CCNB1,MCM10,CCNA2,OIP5,PLK1,SPC24,ZWINT,DEPDC1B,SMC4,SKA3,DTL,CDCA5,MASTL,MGME1,PIM1,HMGA1,SNRPB,RAD51AP1,KIF23,KIF18A,RAD51,CKAP2L,ATAD2,TTK,PBK,EXO1,ZDHHC5,CENPM,LMNB1,PCNA,ECT2,CENPN…
TF	Factor: E2F-1; motif: NGGGCGGGARV	TF:M07206	4.4517089762307225e-9	8.35147323475698	14705	438	380	19917	ZNF367,DDIAS,AURKA,NRM,HASPIN,MCM8,ASF1B,NUF2,PTTG1,TP53I3,CENPA,WEE1,PKN3,SHCBP1,CDK2,CDK1,NCAPH,CDCA8,CEP55,FOXM1,POLA2,KIF20A,TPX2,CHST1,DSN1,SGO1,CKS2,GTSE1,KIFC1,TGFB1I1,PRC1,PIMREG,NUSAP1,BIRC5,CHEK2,HJURP,KIF11,MELK,ORC1,AURKB,ASPM,KIF4A,SFRP2,FANCD2,CCDC86,CENPK,NDC80,FANCC,RASL10A,TOP2A,CHAF1A,ERCC6L,CHEK1,IQGAP3,PCOLCE,CDC25C,CDCA3,CCNB1,MCM10,CCNA2,GAS1,OIP5,NTSR2,MYO1C,FKBP7,SKA1,WDR7…
TF	Factor: E2F-4:DP-1; motif: TTTSGCGC	TF:M00738	4.8153177572350196e-9	8.317375049004573	9912	438	286	19917	ZNF367,DDIAS,AURKA,NRM,HASPIN,MCM8,ASF1B,NUF2,CENPA,WEE1,PKN3,SHCBP1,CDK1,CDCA8,FOXM1,POLA2,KIF20A,TPX2,CHST1,DSN1,SGO1,CKS2,GTSE1,KIFC1,TGFB1I1,PRC1,NUSAP1,CHEK2,HJURP,KIF11,MELK,ORC1,KIF4A,SFRP2,FANCD2,CCDC86,CENPK,NDC80,FANCC,RASL10A,ARHGAP11A,CHAF1A,ERCC6L,CHEK1,IQGAP3,CDC25C,CDCA3,CCNB1,MCM10,CCNA2,OIP5,SKA1,CEP152,SPC24,ZWINT,DEPDC1B,SMC4,SKA3,DTL,NCAPG,CDCA5,MASTL,MYBL2,MKI67,ESCO2,ESPL1,H…
TF	Factor: NF-YA; motif: CRGCCAATCAGNRN	TF:M02106	4.8153177572350196e-9	8.317375049004573	1769	438	83	19917	DDIAS,MCM8,ASF1B,CENPA,CDK1,NCAPH,CEP55,KIF14,CCNB2,KIF20A,CKS2,TGFB1I1,CHEK2,MELK,TOP2A,CHAF1A,ERCC6L,PLK1,DEPDC1B,UBE2C,DTL,BUB1,CDCA2,ESCO2,ESPL1,CENPF,KIF23,POC1A,CKAP2L,ATAD2,ZDHHC5,CENPM,NCAPD2,PON1,TK1,CDC6,SGO2,KPNA2,KLF10,REXO5,RFWD3,TACC3,NEK2,CKS1B,HMGB2,CDCA4,MGAT4C,MCM3,EIF4A1,MCM5,CDKN3,DEPDC1,RNASEH2A,DAXX,DEK,DLGAP5,UBALD2,SLC1A4,E2F7,ORC6,CKAP2,CDC25A,E2F3,TRMT6,CCNF,MTFR2,FAM72D…
TF	Factor: Elk-1; motif: NNNNCCGGAARTNN	TF:M00025	6.074924331446179e-9	8.216459127217723	10355	438	295	19917	DDIAS,AURKA,NRM,HASPIN,MCM8,ASF1B,NUF2,TP53I3,CENPA,WEE1,PKN3,SHCBP1,CDK2,CEP55,KIF14,CCNB2,POLA2,TPX2,CHST1,DSN1,SGO1,CKS2,GTSE1,KIFC1,TGFB1I1,PRC1,PIMREG,BIRC5,HJURP,KIF11,MELK,ORC1,AURKB,KIF4A,FANCD2,CENPK,FANCC,ARHGAP11A,TOP2A,CHAF1A,ERCC6L,CHEK1,IQGAP3,CDC25C,CDCA3,CCNB1,CCNA2,GAS1,MYO1C,FKBP7,SKA1,PLK1,DEPDC1B,SMC4,UBE2C,BUB1,NCAPG,CDCA2,CDCA5,MASTL,TRIP13,ESPL1,HMMR,MGME1,CENPF,PIM1,RIOK1,…
TF	Factor: ZF5; motif: GSGCGCGR; match class: 1	TF:M00716_1	6.28907431246615e-9	8.201413273564771	14230	438	371	19917	ZNF367,DDIAS,AURKA,NRM,MCM8,ASF1B,NUF2,PTTG1,TP53I3,CENPA,WEE1,PKN3,SHCBP1,CDK2,CDK1,NCAPH,CDCA8,CEP55,FOXM1,KIF14,CCNB2,POLA2,KIF20A,TPX2,CHST1,DSN1,CKS2,GTSE1,KIFC1,TGFB1I1,PRC1,PIMREG,NUSAP1,KIF2C,BIRC5,CHEK2,HJURP,KIF11,MELK,ORC1,AURKB,ASPM,KIF4A,SFRP2,FANCD2,CCDC86,CENPK,NDC80,FANCC,RASL10A,ARHGAP11A,CHAF1A,ERCC6L,CHEK1,IQGAP3,CDC25C,CDCA3,CCNB1,MCM10,CCNA2,GAS1,OIP5,NTSR2,MYO1C,SKA1,WDR76,P…
TF	Factor: E2F; motif: TTTCGCGC	TF:M00425	1.0509386879293242e-8	7.978422620099904	11168	438	311	19917	ZNF367,AURKA,HASPIN,MCM8,ASF1B,NUF2,TP53I3,CENPA,WEE1,SHCBP1,CDK1,CDCA8,CEP55,FOXM1,POLA2,KIF20A,TPX2,CHST1,DSN1,CKS2,GTSE1,KIFC1,TGFB1I1,PRC1,NUSAP1,CHEK2,HJURP,KIF11,MELK,ORC1,ASPM,KIF4A,SFRP2,CCDC86,CENPK,NDC80,FANCC,RASL10A,ARHGAP11A,CHAF1A,ERCC6L,CHEK1,IQGAP3,CDC25C,CDCA3,CCNB1,MCM10,CCNA2,OIP5,MYO1C,FKBP7,SKA1,WDR76,PLK1,CEP152,SPC24,ZWINT,DEPDC1B,SMC4,SKA3,DTL,BUB1,NCAPG,CDCA2,CDCA5,MASTL,…
TF	Factor: E2F-1:DP-1; motif: TTTCSCGC	TF:M00736	1.0534916009338346e-8	7.977368922497864	10495	438	297	19917	ZNF367,DDIAS,AURKA,NRM,HASPIN,MCM8,ASF1B,NUF2,TP53I3,CENPA,WEE1,PKN3,SHCBP1,CDK2,CDK1,NCAPH,CEP55,FOXM1,KIF14,POLA2,KIF20A,TPX2,CHST1,SGO1,CKS2,GTSE1,KIFC1,TGFB1I1,NUSAP1,KIF2C,CHEK2,MELK,ORC1,ASPM,KIF4A,SFRP2,FANCD2,CCDC86,CENPK,NDC80,FANCC,RASL10A,ARHGAP11A,TOP2A,CHAF1A,ERCC6L,CHEK1,CDC25C,CDCA3,CCNB1,GAS1,OIP5,MYO1C,SKA1,WDR76,PLK1,CEP152,ZWINT,DEPDC1B,SMC4,SKA3,DTL,NCAPG,CDCA5,MASTL,MKI67,ESP…
TF	Factor: E2F; motif: TTTSGCGS	TF:M00426	1.0611658377577198e-8	7.974216739760313	12013	438	328	19917	ZNF367,DDIAS,AURKA,HASPIN,MCM8,ASF1B,NUF2,PTTG1,TP53I3,CENPA,WEE1,SHCBP1,CDK1,CDCA8,CEP55,FOXM1,POLA2,KIF20A,TPX2,CHST1,DSN1,CKS2,GTSE1,KIFC1,TGFB1I1,PRC1,NUSAP1,KIF2C,CHEK2,HJURP,KIF11,MELK,ORC1,KIF4A,SFRP2,FANCD2,CCDC86,CENPK,NDC80,FANCC,RASL10A,ARHGAP11A,CHAF1A,ERCC6L,CHEK1,IQGAP3,PCOLCE,CDC25C,CCNB1,MCM10,CCNA2,GAS1,OIP5,NTSR2,MYO1C,FKBP7,SKA1,WDR76,PLK1,CEP152,SPC24,ZWINT,SMC4,SKA3,DTL,CDCA5…
TF	Factor: E2F-1; motif: NTTSGCGG	TF:M00430	1.0819173883696032e-8	7.9658058992525005	8113	438	245	19917	ZNF367,DDIAS,HASPIN,MCM8,ASF1B,NUF2,TP53I3,CENPA,WEE1,SHCBP1,CDK2,CDK1,CDCA8,CEP55,POLA2,KIF20A,CHST1,DSN1,SGO1,GTSE1,TGFB1I1,PRC1,NUSAP1,CHEK2,KIF11,MELK,ORC1,AURKB,ASPM,KIF4A,CCDC86,NDC80,CHAF1A,CHEK1,CCNB1,MCM10,CCNA2,OIP5,WDR76,PLK1,ZWINT,DEPDC1B,SMC4,SKA3,DTL,BUB1,NCAPG,MASTL,MYBL2,MGME1,CENPF,PIM1,RIOK1,CEP135,HMGA1,SNRPB,RAD51AP1,KIF23,RAD51,CKAP2L,ATAD2,TTK,PBK,ZDHHC5,CENPM,NCAPD2,PCNA,EC…
TF	Factor: E2F; motif: TTTSGCGC; match class: 1	TF:M00050_1	1.3085824354198309e-8	7.883198913360168	1909	438	86	19917	ZNF367,WEE1,CDK1,POLA2,GTSE1,TGFB1I1,KIF11,FANCC,ARHGAP11A,CHEK1,MCM10,SKA3,DTL,NCAPG,MASTL,MYBL2,PIM1,SNRPB,RAD51,EXO1,ZDHHC5,LMNB1,PCNA,RRM2,E2F2,KNL1,FANCI,CENPH,CDC6,CAV1,DAP3,SF3B3,WDR62,RFWD3,PPM1D,MCM2,MCM3,EIF4A1,MCM5,RNASEH2A,MIS18A,LRR1,NR3C2,PCLAF,MXD3,DEK,TRIM26,NIP7,HAUS8,DLGAP5,RFC3,SLC1A4,TMEM47,CDC25A,BLOC1S5,E2F3,DYNLRB2,DNMT1,CCNF,GINS1,CDT1,CLSPN,E2F1,FBXO5,KMT5A,DBF4,AFAP1L1,M…
TF	Factor: E2F-1; motif: NNNSSCGCSAANN; match class: 1	TF:M07250_1	3.1067108563191853e-8	7.507699164945373	5555	438	183	19917	ZNF367,AURKA,CDK1,CDCA8,FOXM1,POLA2,KIF20A,TPX2,CHST1,DSN1,GTSE1,KIFC1,PRC1,HJURP,KIF11,MELK,ORC1,SFRP2,CCDC86,CENPK,NDC80,RASL10A,CHAF1A,ERCC6L,CHEK1,CCNB1,MCM10,CCNA2,ZWINT,SMC4,SKA3,DTL,NCAPG,MYBL2,ESCO2,MGME1,HMGA1,KIF18A,CKAP2L,EXO1,ZDHHC5,CENPM,LMNB1,PCNA,ECT2,CENPN,E2F2,LMNB2,PRIM2,CDC45,CDC20,FANCI,CENPH,CENPL,TK1,CDC6,TIMELESS,DAP3,KPNA2,MLX,CCND1,SF3B3,IKBIP,ALDH2,BUB1B,KLF10,DSCC1,BORA…
TF	Factor: E2F-1:Elk-1; motif: SGCGCSNNAMCGGAAGT; match class: 1	TF:M08205_1	3.791329618239272e-8	7.421208456365051	10502	438	295	19917	ZNF367,AURKA,NRM,HASPIN,MCM8,NUF2,TP53I3,WEE1,PKN3,SHCBP1,NCAPH,CEP55,FOXM1,KIF14,CCNB2,POLA2,KIF20A,CHST1,CKS2,GTSE1,KIFC1,PRC1,PIMREG,NUSAP1,KIF2C,BIRC5,HJURP,KIF11,MELK,ORC1,AURKB,ASPM,SFRP2,FANCD2,CENPK,NDC80,FANCC,RASL10A,TOP2A,ERCC6L,CHEK1,CDCA3,CCNB1,MCM10,GAS1,OIP5,MYO1C,WDR76,PLK1,SPC24,ZWINT,DEPDC1B,SMC4,NCAPG,CDCA2,CDCA5,MKI67,TRIP13,HMMR,MGME1,CENPF,PIM1,RIOK1,CEP135,HMGA1,SNRPB,CKAP2…
TF	Factor: E2F-4; motif: GCGGGAAANA	TF:M02090	3.99594999866796e-8	7.398379954739963	12068	438	327	19917	ZNF367,DDIAS,AURKA,NRM,HASPIN,MCM8,ASF1B,PTTG1,TP53I3,CENPA,WEE1,PKN3,CDK2,CDK1,NCAPH,CDCA8,CEP55,FOXM1,KIF20A,CHST1,GTSE1,KIFC1,PRC1,PIMREG,NUSAP1,KIF2C,BIRC5,CHEK2,HJURP,KIF11,MELK,ORC1,AURKB,ASPM,SFRP2,FANCD2,CENPK,FANCC,RASL10A,ARHGAP11A,TOP2A,ERCC6L,CHEK1,IQGAP3,PCOLCE,CDCA3,CCNB1,CCNA2,GAS1,OIP5,NTSR2,FKBP7,SKA1,WDR76,PLK1,SPC24,DEPDC1B,SMC4,UBE2C,SKA3,DTL,NCAPG,CDCA5,MASTL,MYBL2,MKI67,TRIP…
TF	Factor: E2F-4; motif: NTTTCSCGCC; match class: 1	TF:M07380_1	4.5992206868653694e-8	7.337315750941645	8046	438	241	19917	ZNF367,DDIAS,AURKA,NRM,MCM8,ASF1B,NUF2,CENPA,WEE1,PKN3,NCAPH,CDCA8,CEP55,FOXM1,POLA2,CHST1,DSN1,GTSE1,KIFC1,PIMREG,NUSAP1,CHEK2,MELK,CENPK,NDC80,FANCC,RASL10A,TOP2A,CHAF1A,ERCC6L,CHEK1,PCOLCE,CDC25C,CDCA3,CCNB1,MCM10,CCNA2,GAS1,OIP5,MYO1C,WDR76,PLK1,CEP152,UBE2C,BUB1,CDCA5,MASTL,MYBL2,MKI67,PIM1,RIOK1,CEP135,HMGA1,SNRPB,RAD51AP1,KIF23,KIF18A,RAD51,ATAD2,EXO1,ZDHHC5,CENPM,NCAPD2,LMNB1,PCNA,ALDOC,C…
TF	Factor: E2F-3; motif: NNGGCGGGAAA	TF:M09893	5.195538058652801e-8	7.2843694695113275	6128	438	196	19917	ZNF367,NRM,HASPIN,MCM8,ASF1B,TP53I3,CENPA,WEE1,PKN3,SHCBP1,CDK2,NCAPH,CEP55,POLA2,CHST1,NUSAP1,CHEK2,HJURP,ORC1,AURKB,ASPM,SFRP2,FANCD2,CENPK,FANCC,RASL10A,CHAF1A,CHEK1,CDCA3,CCNA2,GAS1,OIP5,SKA1,WDR76,CEP152,DEPDC1B,SMC4,UBE2C,SKA3,DTL,NCAPG,MASTL,MYBL2,TRIP13,ESPL1,MGME1,CENPF,PIM1,CEP135,SNRPB,RAD51AP1,RAD51,ATAD2,TTK,CENPM,NCAPD2,LMNB1,PCNA,ALDOC,CENPN,PARPBP,PRIM2,CBFB,FANCI,CENPH,FRMD8,TK1,…
TF	Factor: p300; motif: ACNTCCG; match class: 1	TF:M04826_1	5.391336120745737e-8	7.268303591407379	15413	438	389	19917	ZNF367,DDIAS,AURKA,HASPIN,MCM8,ASF1B,NUF2,PTTG1,CENPA,WEE1,PKN3,SHCBP1,CDK2,CDK1,NCAPH,CDCA8,CEP55,FOXM1,KIF14,CCNB2,POLA2,KIF20A,TPX2,CHST1,DSN1,SGO1,CKS2,GTSE1,KIFC1,PRC1,PIMREG,NUSAP1,KIF2C,BIRC5,CHEK2,HJURP,KIF11,MELK,ORC1,AURKB,ASPM,KIF4A,SFRP2,FANCD2,CCDC86,FANCC,RASL10A,ARHGAP11A,TOP2A,CHAF1A,ERCC6L,CHEK1,IQGAP3,PCOLCE,CDCA3,CCNB1,MCM10,CCNA2,GAS1,OIP5,NTSR2,MYO1C,FKBP7,SKA1,WDR76,PLK1,CEP…
TF	Factor: Rb:E2F-1:DP-1; motif: TTTSGCGC	TF:M00740	5.3927518298722736e-8	7.268189565136825	10536	438	295	19917	ZNF367,DDIAS,AURKA,NRM,HASPIN,MCM8,ASF1B,CENPA,WEE1,PKN3,SHCBP1,CDK1,CDCA8,FOXM1,POLA2,KIF20A,TPX2,CHST1,DSN1,SGO1,CKS2,GTSE1,KIFC1,TGFB1I1,PRC1,NUSAP1,CHEK2,HJURP,KIF11,MELK,ORC1,KIF4A,FANCD2,CCDC86,CENPK,NDC80,FANCC,RASL10A,ARHGAP11A,CHAF1A,ERCC6L,CHEK1,IQGAP3,CDC25C,CCNB1,MCM10,CCNA2,OIP5,SKA1,CEP152,SPC24,ZWINT,DEPDC1B,SMC4,SKA3,DTL,BUB1,NCAPG,CDCA2,CDCA5,MASTL,MYBL2,MKI67,ESPL1,HMMR,MGME1,CE…
TF	Factor: Egr-1; motif: GCGCATGCG	TF:M04869	6.257474878497905e-8	7.203600885251762	11319	438	311	19917	ZNF367,AURKA,NRM,HASPIN,NUF2,CENPA,WEE1,PKN3,CDK2,CDK1,NCAPH,CEP55,FOXM1,KIF14,CCNB2,POLA2,KIF20A,TPX2,CHST1,DSN1,SGO1,CKS2,GTSE1,KIFC1,TGFB1I1,PRC1,PIMREG,NUSAP1,KIF2C,CHEK2,KIF11,MELK,ASPM,SFRP2,CCDC86,NDC80,FANCC,RASL10A,CHAF1A,ERCC6L,CHEK1,CDC25C,CDCA3,CCNB1,MCM10,CCNA2,GAS1,OIP5,NTSR2,SKA1,SPC24,ZWINT,DEPDC1B,SMC4,UBE2C,SKA3,DTL,BUB1,NCAPG,CDCA2,MASTL,MYBL2,MKI67,TRIP13,ESCO2,HMMR,MGME1,CENP…
TF	Factor: E2F-1:DP-1; motif: TTTCSCGC; match class: 1	TF:M00736_1	6.91740755453142e-8	7.16005663613716	4694	438	160	19917	ZNF367,DDIAS,AURKA,NRM,HASPIN,MCM8,ASF1B,CENPA,WEE1,PKN3,SHCBP1,CDK2,FOXM1,TPX2,TGFB1I1,NUSAP1,ORC1,SFRP2,CCDC86,FANCC,CHAF1A,CHEK1,CDC25C,GAS1,OIP5,DEPDC1B,SMC4,SKA3,DTL,NCAPG,MASTL,MGME1,PIM1,SNRPB,RAD51,ATAD2,EXO1,ZDHHC5,CENPM,LMNB1,PCNA,ECT2,KIF20B,CENPN,E2F2,PRIM2,KNL1,FANCI,CENPH,TIMELESS,KPNA2,SF3B3,KLF10,WDR62,BORA,TONSL,HMGB2,HPSE2,PPM1D,SREBF1,MCM2,MND1,CDCA4,TCF19,MCM3,EIF4A1,MCM5,RNAS…
TF	Factor: E2F-4; motif: NNTTCCCGCCNN	TF:M04823	6.91740755453142e-8	7.16005663613716	12880	438	342	19917	ZNF367,DDIAS,AURKA,NRM,HASPIN,MCM8,ASF1B,NUF2,TP53I3,CENPA,WEE1,PKN3,SHCBP1,CDK2,CDK1,NCAPH,CDCA8,CEP55,POLA2,CHST1,DSN1,SGO1,GTSE1,KIFC1,TGFB1I1,PRC1,PIMREG,NUSAP1,BIRC5,CHEK2,HJURP,KIF11,MELK,ORC1,AURKB,KIF4A,SFRP2,FANCD2,CCDC86,CENPK,FANCC,RASL10A,TOP2A,CHAF1A,ERCC6L,CHEK1,IQGAP3,PCOLCE,CDC25C,CDCA3,CCNB1,MCM10,CCNA2,GAS1,OIP5,NTSR2,MYO1C,FKBP7,SKA1,WDR76,PLK1,CEP152,SPC24,DEPDC1B,SMC4,UBE2C,S…
TF	Factor: E2F-4; motif: NGGCGGGAARN	TF:M07084	7.073599703187493e-8	7.150359520661459	10945	438	303	19917	ZNF367,DDIAS,AURKA,NRM,HASPIN,MCM8,ASF1B,TP53I3,CENPA,WEE1,PKN3,SHCBP1,CDK2,NCAPH,CDCA8,CEP55,POLA2,CHST1,DSN1,GTSE1,PRC1,PIMREG,NUSAP1,BIRC5,CHEK2,HJURP,MELK,ORC1,AURKB,KIF4A,SFRP2,FANCD2,CENPK,FANCC,RASL10A,TOP2A,CHAF1A,ERCC6L,CHEK1,IQGAP3,PCOLCE,CDC25C,CDCA3,CCNA2,GAS1,OIP5,NTSR2,MYO1C,FKBP7,SKA1,WDR76,PLK1,CEP152,SPC24,DEPDC1B,SMC4,UBE2C,SKA3,DTL,NCAPG,CDCA2,CDCA5,MASTL,MYBL2,MKI67,TRIP13,ESP…
TF	Factor: E2F-1; motif: NTTTCGCGCS	TF:M00940	7.59572766866051e-8	7.119430614514033	7873	438	236	19917	ZNF367,AURKA,NRM,HASPIN,MCM8,ASF1B,TP53I3,CENPA,WEE1,PKN3,CDK1,CDCA8,CEP55,FOXM1,POLA2,KIF20A,TPX2,CHST1,DSN1,CKS2,KIFC1,TGFB1I1,NUSAP1,CHEK2,KIF11,MELK,ORC1,FANCD2,CCDC86,CENPK,FANCC,RASL10A,ARHGAP11A,CHAF1A,ERCC6L,CHEK1,CDC25C,CDCA3,CCNB1,MCM10,CCNA2,GAS1,OIP5,SKA1,CEP152,SPC24,ZWINT,SMC4,SKA3,DTL,CDCA5,MASTL,MYBL2,ESCO2,ESPL1,HMMR,MGME1,PIM1,HMGA1,SNRPB,KIF23,KIF18A,POC1A,ATAD2,TTK,PBK,EXO1,ZD…
TF	Factor: ZF5; motif: NRNGNGCGCGCWN	TF:M00333	7.928533323405643e-8	7.1008071441406075	15217	438	385	19917	ZNF367,DDIAS,AURKA,HASPIN,MCM8,ASF1B,NUF2,PTTG1,TP53I3,CENPA,WEE1,PKN3,CDK1,NCAPH,CDCA8,CEP55,FOXM1,KIF14,CCNB2,POLA2,TPX2,CHST1,DSN1,SGO1,CKS2,GTSE1,KIFC1,TGFB1I1,PRC1,PIMREG,NUSAP1,KIF2C,BIRC5,CHEK2,KIF11,MELK,ORC1,AURKB,ASPM,KIF4A,SFRP2,FANCD2,CENPK,NDC80,FANCC,RASL10A,ARHGAP11A,TOP2A,CHAF1A,ERCC6L,CHEK1,CDCA3,CCNB1,MCM10,CCNA2,GAS1,OIP5,NTSR2,MYO1C,FKBP7,SKA1,WDR76,PLK1,CEP152,SPC24,ZWINT,DEP…
TF	Factor: E2F-1; motif: TTTSGCGCGMNR	TF:M00516	8.299283638419209e-8	7.080959392600815	6972	438	215	19917	ZNF367,AURKA,MCM8,WEE1,SHCBP1,CDK1,CDCA8,FOXM1,POLA2,TPX2,CHST1,DSN1,CKS2,KIFC1,PRC1,NUSAP1,CHEK2,HJURP,KIF11,MELK,ORC1,CCDC86,CENPK,NDC80,FANCC,RASL10A,ARHGAP11A,CHAF1A,ERCC6L,CHEK1,IQGAP3,CDC25C,CCNB1,MCM10,CCNA2,OIP5,SKA1,WDR76,CEP152,SPC24,ZWINT,SMC4,SKA3,DTL,CDCA5,MYBL2,MKI67,ESPL1,HMMR,MGME1,PIM1,KIF18A,RAD51,CKAP2L,ATAD2,PBK,EXO1,ZDHHC5,CENPM,NCAPD2,LMNB1,PCNA,ECT2,RRM2,CENPN,E2F2,C5ORF34,…
TF	Factor: c-Ets-1; motif: NNNRCCGGAWRYNNNN	TF:M01078	8.344790784075306e-8	7.078584547236457	7621	438	230	19917	DDIAS,AURKA,NRM,HASPIN,MCM8,ASF1B,NUF2,WEE1,PKN3,CDK2,CEP55,KIF14,CCNB2,TPX2,CHST1,SGO1,CKS2,GTSE1,KIFC1,TGFB1I1,PIMREG,KIF2C,HJURP,MELK,ORC1,AURKB,ASPM,KIF4A,FANCD2,NDC80,FANCC,ARHGAP11A,ERCC6L,CHEK1,CDC25C,CDCA3,CCNB1,GAS1,MYO1C,FKBP7,SKA1,PLK1,DEPDC1B,UBE2C,DTL,NCAPG,CDCA2,CDCA5,MASTL,MLC1,MKI67,TRIP13,ESPL1,MGME1,RIOK1,CEP135,SNRPB,KIF23,POC1A,RAD51,ZDHHC5,NCAPD2,ZPR1,PCNA,ECT2,KIF20B,PARPBP,…
TF	Factor: E2F; motif: NNTTTCGCGCN	TF:M08875	8.786637787510553e-8	7.056177276196638	6260	438	198	19917	ZNF367,AURKA,MCM8,ASF1B,NUF2,CENPA,CDK1,CDCA8,FOXM1,POLA2,KIF20A,TPX2,DSN1,SGO1,CKS2,KIFC1,NUSAP1,KIF2C,KIF11,MELK,ORC1,SFRP2,FANCD2,CCDC86,CENPK,FANCC,RASL10A,ARHGAP11A,ERCC6L,CHEK1,CDC25C,CDCA3,CCNB1,OIP5,SKA1,WDR76,ZWINT,SMC4,SKA3,DTL,CDCA5,MASTL,MYBL2,ESCO2,ESPL1,HMMR,MGME1,PIM1,HMGA1,SNRPB,POC1A,ATAD2,TTK,PBK,EXO1,ZDHHC5,CENPM,LMNB1,PCNA,E2F2,FANCI,CENPH,CENPL,GEMIN6,SLC26A2,CDC6,TIMELESS,VK…
TF	Factor: E2F-2; motif: NWTTTGGCGCCAWWNN	TF:M11530	8.93770084313527e-8	7.048774185852644	14722	438	376	19917	ZNF367,DDIAS,AURKA,NRM,HASPIN,MCM8,TP53I3,CENPA,WEE1,PKN3,SHCBP1,CDK2,CDK1,NCAPH,CDCA8,CEP55,FOXM1,KIF14,CCNB2,POLA2,TPX2,CHST1,DSN1,CKS2,GTSE1,KIFC1,TGFB1I1,PRC1,PIMREG,NUSAP1,KIF2C,BIRC5,CHEK2,HJURP,KIF11,MELK,ORC1,AURKB,ASPM,KIF4A,SFRP2,FANCD2,CCDC86,CENPK,NDC80,FANCC,RASL10A,TOP2A,CHAF1A,ERCC6L,CHEK1,IQGAP3,PCOLCE,CDC25C,CDCA3,CCNB1,MCM10,CCNA2,GAS1,OIP5,NTSR2,MYO1C,FKBP7,WDR76,PLK1,CEP152,SP…
TF	Factor: ZF5; motif: NRNGNGCGCGCWN; match class: 1	TF:M00333_1	1.028305037791157e-7	6.98787803652891	12512	438	334	19917	ZNF367,AURKA,HASPIN,ASF1B,PTTG1,TP53I3,CENPA,WEE1,PKN3,CDK1,NCAPH,CDCA8,CEP55,FOXM1,KIF14,CCNB2,POLA2,TPX2,CHST1,DSN1,CKS2,GTSE1,KIFC1,TGFB1I1,PIMREG,NUSAP1,KIF2C,BIRC5,KIF11,MELK,ORC1,AURKB,ASPM,KIF4A,SFRP2,FANCD2,CENPK,NDC80,FANCC,RASL10A,ARHGAP11A,CHAF1A,ERCC6L,CHEK1,CDCA3,CCNB1,MCM10,CCNA2,GAS1,OIP5,NTSR2,MYO1C,PLK1,CEP152,ZWINT,DEPDC1B,SMC4,UBE2C,SKA3,DTL,BUB1,NCAPG,CDCA2,CDCA5,MASTL,MYBL2,M…
TF	Factor: E2F; motif: TTTSGCGC	TF:M00050	1.158639690131326e-7	6.936051598476544	7130	438	218	19917	ZNF367,DDIAS,AURKA,NRM,HASPIN,MCM8,ASF1B,CENPA,WEE1,PKN3,CDK1,FOXM1,POLA2,KIF20A,CHST1,DSN1,SGO1,GTSE1,KIFC1,TGFB1I1,NUSAP1,CHEK2,KIF11,MELK,KIF4A,FANCD2,CCDC86,NDC80,FANCC,ARHGAP11A,CHAF1A,CHEK1,MCM10,CCNA2,OIP5,SKA1,CEP152,DEPDC1B,SMC4,SKA3,DTL,NCAPG,CDCA5,MASTL,MYBL2,MKI67,ESPL1,HMMR,PIM1,SNRPB,RAD51,ATAD2,TTK,PBK,EXO1,ZDHHC5,CENPM,NCAPD2,LMNB1,PCNA,RRM2,KIF20B,E2F2,PRIM2,CDC45,KNL1,FANCI,CENP…
TF	Factor: E2F-3:HES-7; motif: NNNSGCGCSNNNNNCRCGYGNN	TF:M08526	1.2435043610636443e-7	6.9053526872878495	17025	438	414	19917	ZNF367,DDIAS,AURKA,NRM,HASPIN,MCM8,ASF1B,NUF2,PTTG1,TP53I3,CENPA,WEE1,PKN3,SHCBP1,CDK2,CDK1,NCAPH,CDCA8,CEP55,FOXM1,KIF14,CCNB2,POLA2,KIF20A,TPX2,CHST1,DSN1,SGO1,CKS2,GTSE1,KIFC1,TGFB1I1,PRC1,PIMREG,NUSAP1,KIF2C,BIRC5,CHEK2,HJURP,KIF11,MELK,ORC1,AURKB,ASPM,KIF4A,SFRP2,FANCD2,CCDC86,CENPK,NDC80,FANCC,RASL10A,ARHGAP11A,TOP2A,CHAF1A,ERCC6L,CHEK1,IQGAP3,PCOLCE,CDC25C,CDCA3,CCNB1,MCM10,CCNA2,GAS1,OIP5…
TF	Factor: ER81; motif: RCCGGAARYN; match class: 1	TF:M02065_1	1.2912443354453143e-7	6.888991570672895	6798	438	210	19917	DDIAS,HASPIN,MCM8,ASF1B,TP53I3,WEE1,SHCBP1,KIF14,CCNB2,POLA2,DSN1,SGO1,CKS2,GTSE1,KIFC1,TGFB1I1,CHEK2,HJURP,MELK,ORC1,FANCD2,FANCC,ARHGAP11A,TOP2A,CHAF1A,ERCC6L,CHEK1,CCNB1,CCNA2,MYO1C,SKA1,PLK1,DEPDC1B,SMC4,BUB1,CDCA5,MASTL,TRIP13,MGME1,RIOK1,CEP135,SNRPB,KIF23,KIF18A,RAD51,EXO1,ZDHHC5,NCAPD2,ZPR1,LMNB1,RRM2,KIF20B,PARPBP,E2F2,PRIM2,C5ORF34,CDC45,CBFB,CDC20,KNL1,FANCI,CENPH,CENPL,SLC26A2,ZYX,DAP…
TF	Factor: E2F-4; motif: NGGCGGGAARN; match class: 1	TF:M07084_1	1.3413773757836802e-7	6.872449022920942	5470	438	178	19917	ZNF367,DDIAS,NRM,MCM8,ASF1B,TP53I3,CENPA,WEE1,PKN3,SHCBP1,CEP55,CHST1,NUSAP1,CHEK2,MELK,KIF4A,SFRP2,FANCC,RASL10A,TOP2A,CHAF1A,ERCC6L,CHEK1,CDCA3,GAS1,OIP5,WDR76,SMC4,SKA3,DTL,NCAPG,CDCA5,MASTL,MYBL2,MKI67,TRIP13,MGME1,PIM1,CEP135,SNRPB,RAD51AP1,KIF23,CKAP2L,ATAD2,CENPM,LMNB1,ALDOC,CENPN,PARPBP,CDC45,FANCI,FRMD8,TK1,TIMELESS,ZYX,KLF10,WDR62,NKIRAS2,BORA,RPIA,RFWD3,TACC3,TONSL,HMGB2,HPSE2,PPM1D,SR…
TF	Factor: E2F-2; motif: GCGCGCGCNCS; match class: 1	TF:M11529_1	1.348737330208434e-7	6.870072621972728	14592	438	373	19917	ZNF367,NRM,HASPIN,MCM8,ASF1B,NUF2,PTTG1,TP53I3,WEE1,PKN3,SHCBP1,CDK2,CDK1,NCAPH,CDCA8,CEP55,FOXM1,KIF14,CCNB2,POLA2,KIF20A,TPX2,CHST1,DSN1,CKS2,GTSE1,KIFC1,TGFB1I1,PRC1,PIMREG,NUSAP1,KIF2C,BIRC5,CHEK2,HJURP,MELK,ORC1,AURKB,ASPM,KIF4A,SFRP2,FANCD2,CCDC86,CENPK,NDC80,FANCC,RASL10A,ARHGAP11A,TOP2A,CHAF1A,ERCC6L,CHEK1,IQGAP3,PCOLCE,CDC25C,CDCA3,MCM10,CCNA2,GAS1,OIP5,NTSR2,MYO1C,FKBP7,PLK1,CEP152,SPC2…
TF	Factor: BEN; motif: CAGCGRNV	TF:M01240	1.6149450008290366e-7	6.791842263576338	16656	438	408	19917	ZNF367,DDIAS,AURKA,NRM,HASPIN,MCM8,ASF1B,NUF2,PTTG1,TP53I3,CENPA,WEE1,PKN3,SHCBP1,CDK2,CDK1,NCAPH,CDCA8,CEP55,FOXM1,KIF14,CCNB2,POLA2,KIF20A,TPX2,CHST1,DSN1,CKS2,GTSE1,KIFC1,TGFB1I1,PRC1,PIMREG,NUSAP1,KIF2C,BIRC5,CHEK2,HJURP,KIF11,MELK,ORC1,AURKB,ASPM,KIF4A,SFRP2,FANCD2,CCDC86,CENPK,NDC80,FANCC,RASL10A,ARHGAP11A,TOP2A,CHAF1A,ERCC6L,CHEK1,IQGAP3,PCOLCE,TROAP,CDC25C,CDCA3,CCNB1,MCM10,CCNA2,GAS1,OIP…
TF	Factor: E2F-2; motif: GCGCGCGCGYW	TF:M11531	1.6753289200465193e-7	6.7758999145152154	13379	438	350	19917	ZNF367,AURKA,NRM,HASPIN,ASF1B,NUF2,PTTG1,CENPA,WEE1,PKN3,CDK1,NCAPH,CDCA8,CEP55,FOXM1,KIF14,POLA2,KIF20A,TPX2,CHST1,DSN1,SGO1,CKS2,GTSE1,KIFC1,TGFB1I1,PRC1,PIMREG,NUSAP1,KIF2C,BIRC5,CHEK2,HJURP,MELK,ORC1,AURKB,ASPM,KIF4A,SFRP2,CCDC86,CENPK,NDC80,FANCC,RASL10A,ARHGAP11A,CHAF1A,ERCC6L,CHEK1,CDC25C,CDCA3,MCM10,CCNA2,GAS1,OIP5,NTSR2,MYO1C,FKBP7,WDR76,PLK1,CEP152,ZWINT,DEPDC1B,SMC4,SKA3,DTL,BUB1,NCAPG…
TF	Factor: ER81; motif: RCCGGAARYN	TF:M02065	1.8121888426101726e-7	6.7417965478125055	12666	438	336	19917	ZNF367,DDIAS,AURKA,NRM,HASPIN,MCM8,ASF1B,NUF2,PTTG1,TP53I3,CENPA,WEE1,PKN3,SHCBP1,CDK2,CDCA8,CEP55,FOXM1,KIF14,CCNB2,POLA2,TPX2,CHST1,DSN1,SGO1,CKS2,GTSE1,KIFC1,TGFB1I1,PRC1,PIMREG,NUSAP1,KIF2C,BIRC5,CHEK2,HJURP,KIF11,MELK,ORC1,AURKB,KIF4A,FANCD2,CCDC86,CENPK,FANCC,RASL10A,ARHGAP11A,TOP2A,CHAF1A,ERCC6L,CHEK1,IQGAP3,PCOLCE,CDC25C,CDCA3,CCNB1,MCM10,CCNA2,GAS1,OIP5,MYO1C,FKBP7,SKA1,PLK1,ZWINT,DEPDC1…
TF	Factor: Elf-1; motif: NANGCGGAAGTR	TF:M11452	1.8803958068528514e-7	6.725750725928105	6324	438	198	19917	DDIAS,AURKA,HASPIN,MCM8,ASF1B,NUF2,WEE1,CDCA8,FOXM1,KIF14,CCNB2,POLA2,TPX2,CHST1,SGO1,CKS2,GTSE1,KIFC1,NUSAP1,KIF2C,ORC1,AURKB,KIF4A,FANCD2,CCDC86,FANCC,RASL10A,ARHGAP11A,TOP2A,CHAF1A,OIP5,MYO1C,FKBP7,ZWINT,DEPDC1B,UBE2C,BUB1,NCAPG,CDCA5,MASTL,TRIP13,RIOK1,SNRPB,KIF23,RAD51,EXO1,ZDHHC5,NCAPD2,ZPR1,KIF20B,PARPBP,LMNB2,PRIM2,C5ORF34,CDC45,CBFB,KNL1,PON1,FANCI,FRMD8,SLC26A2,ZYX,ETNPPL,DAP3,CCND1,SF3…
TF	Factor: ETS1; motif: ACCGGAARYN	TF:M03977	1.914382572485643e-7	6.717971267961151	10612	438	294	19917	ZNF367,DDIAS,AURKA,NRM,HASPIN,MCM8,ASF1B,TP53I3,CENPA,WEE1,PKN3,SHCBP1,CDK2,CEP55,KIF14,POLA2,TPX2,DSN1,SGO1,CKS2,GTSE1,KIFC1,TGFB1I1,PRC1,PIMREG,BIRC5,HJURP,KIF11,MELK,ORC1,AURKB,KIF4A,FANCD2,CENPK,NDC80,ARHGAP11A,TOP2A,CHAF1A,ERCC6L,CHEK1,IQGAP3,PCOLCE,CDCA3,CCNB1,MCM10,CCNA2,GAS1,MYO1C,SKA1,PLK1,CEP152,DEPDC1B,SMC4,UBE2C,BUB1,NCAPG,CDCA2,CDCA5,MASTL,MLC1,TRIP13,ESPL1,HMMR,MGME1,CENPF,PIM1,RIOK…
TF	Factor: Elf-1; motif: NANGCGGAAGTN	TF:M11448	2.0035954343899204e-7	6.6981899666119515	7657	438	229	19917	DDIAS,AURKA,HASPIN,MCM8,ASF1B,NUF2,PTTG1,WEE1,CDCA8,FOXM1,KIF14,CCNB2,TPX2,CHST1,SGO1,CKS2,GTSE1,KIFC1,NUSAP1,KIF2C,CHEK2,MELK,ORC1,AURKB,KIF4A,FANCD2,CCDC86,FANCC,RASL10A,ARHGAP11A,TOP2A,CHAF1A,CCNA2,OIP5,MYO1C,FKBP7,CEP152,SPC24,ZWINT,DEPDC1B,UBE2C,SKA3,DTL,BUB1,NCAPG,CDCA5,MASTL,TRIP13,MGME1,PIM1,RIOK1,SNRPB,KIF23,RAD51,ATAD2,EXO1,ZDHHC5,NCAPD2,ZPR1,RRM2,KIF20B,PARPBP,LMNB2,PRIM2,C5ORF34,CDC45…
TF	Factor: E2F-1; motif: NTTTCGCGCS; match class: 1	TF:M00940_1	2.387893814811446e-7	6.621984989379675	2672	438	104	19917	ZNF367,AURKA,WEE1,CDK1,FOXM1,POLA2,TPX2,CHEK2,FANCD2,CCDC86,CENPK,FANCC,CHAF1A,CHEK1,CDCA3,SKA3,DTL,CDCA5,MASTL,PIM1,HMGA1,SNRPB,KIF18A,ATAD2,ZDHHC5,CENPM,LMNB1,PCNA,E2F2,FANCI,CENPH,TIMELESS,KPNA2,SF3B3,WDR62,BORA,RFWD3,HMGB2,PPM1D,MCM2,MND1,TCF19,MCM3,EIF4A1,MCM5,CDKN3,RFC2,KNTC1,RNASEH2A,LRR1,NR3C2,PCLAF,MXD3,EGLN3,DEK,TRIM26,UBALD2,RFC3,PFN1,TMEM47,CNOT1,CDC25A,NEIL3,E2F3,DDX19B,DYNLRB2,DNMT1…
TF	Factor: E2F-1:Elk-1; motif: SGCGCSNNAMCGGAAGT	TF:M08205	3.4832043655392326e-7	6.458021043996478	14560	438	371	19917	ZNF367,AURKA,NRM,HASPIN,MCM8,ASF1B,NUF2,TP53I3,WEE1,PKN3,SHCBP1,CDK2,NCAPH,CEP55,FOXM1,KIF14,CCNB2,POLA2,KIF20A,TPX2,CHST1,DSN1,SGO1,CKS2,GTSE1,KIFC1,TGFB1I1,PRC1,PIMREG,NUSAP1,KIF2C,BIRC5,HJURP,KIF11,MELK,ORC1,AURKB,ASPM,KIF4A,SFRP2,FANCD2,CCDC86,CENPK,NDC80,FANCC,RASL10A,ARHGAP11A,TOP2A,CHAF1A,ERCC6L,CHEK1,PCOLCE,CDC25C,CDCA3,CCNB1,MCM10,CCNA2,GAS1,OIP5,MYO1C,WDR76,PLK1,CEP152,SPC24,ZWINT,DEPDC…
TF	Factor: E2F; motif: GGCGSG	TF:M00803	3.590209598741704e-7	6.444880196290828	13289	438	347	19917	ZNF367,DDIAS,AURKA,NRM,HASPIN,ASF1B,NUF2,TP53I3,CENPA,WEE1,PKN3,CDK1,NCAPH,CDCA8,CEP55,FOXM1,KIF14,POLA2,TPX2,CHST1,DSN1,SGO1,CKS2,GTSE1,KIFC1,TGFB1I1,PRC1,PIMREG,NUSAP1,KIF2C,BIRC5,CHEK2,HJURP,KIF11,MELK,ORC1,AURKB,ASPM,KIF4A,SFRP2,FANCD2,CENPK,NDC80,FANCC,RASL10A,CHAF1A,ERCC6L,CHEK1,PCOLCE,CDC25C,CCNB1,MCM10,CCNA2,GAS1,OIP5,NTSR2,MYO1C,FKBP7,SKA1,WDR76,PLK1,ZWINT,DEPDC1B,SKA3,DTL,NCAPG,CDCA5,MA…
TF	Factor: ETV7; motif: NCCGGAANNN	TF:M02071	4.5533290171294724e-7	6.341670967051544	10214	438	284	19917	ZNF367,DDIAS,AURKA,NRM,MCM8,ASF1B,TP53I3,CENPA,WEE1,PKN3,SHCBP1,CDK2,CEP55,FOXM1,KIF14,POLA2,TPX2,DSN1,SGO1,CKS2,GTSE1,KIFC1,TGFB1I1,PRC1,PIMREG,BIRC5,HJURP,KIF11,MELK,ORC1,AURKB,KIF4A,FANCD2,CENPK,ARHGAP11A,TOP2A,CHAF1A,ERCC6L,CHEK1,IQGAP3,PCOLCE,CDCA3,CCNB1,CCNA2,GAS1,MYO1C,SKA1,PLK1,DEPDC1B,SMC4,UBE2C,BUB1,NCAPG,CDCA2,CDCA5,MASTL,MYBL2,TRIP13,ESPL1,HMMR,MGME1,CENPF,PIM1,RIOK1,CEP135,SNRPB,KIF2…
TF	Factor: E2F; motif: NNTTTCGCGCN; match class: 1	TF:M08875_1	5.168067976035967e-7	6.286671782663287	1744	438	76	19917	ZNF367,AURKA,FOXM1,POLA2,KIF20A,FANCD2,CCDC86,CENPK,FANCC,CHEK1,WDR76,SMC4,SKA3,DTL,CDCA5,MYBL2,PIM1,SNRPB,ATAD2,ZDHHC5,CENPM,LMNB1,PCNA,E2F2,FANCI,TIMELESS,KPNA2,SF3B3,WDR62,BORA,PPM1D,MCM2,TCF19,MCM3,MCM5,KNTC1,RNASEH2A,NR3C2,PCLAF,DEK,TRIM26,UBALD2,RFC3,MAD2L1,PFN1,CNOT1,CDC25A,NEIL3,E2F3,DYNLRB2,DNMT1,MCAM,GINS1,CDT1,CLSPN,E2F1,FBXO5,TEAD4,C11ORF24,DBF4,MCM4,NEMP1,MCM6,HELLS,CDC25B,NIBAN2,ELO…
TF	Factor: IRX-1; motif: NACRYNNNNNNNNRYGNN	TF:M11018	5.658375226736326e-7	6.2473082563315305	17131	438	414	19917	ZNF367,DDIAS,AURKA,NRM,HASPIN,MCM8,ASF1B,NUF2,PTTG1,TP53I3,CENPA,WEE1,PKN3,SHCBP1,CDK2,NCAPH,CDCA8,CEP55,FOXM1,KIF14,CCNB2,POLA2,KIF20A,TPX2,CHST1,DSN1,SGO1,CKS2,GTSE1,KIFC1,TGFB1I1,PRC1,PIMREG,NUSAP1,KIF2C,BIRC5,CHEK2,HJURP,KIF11,MELK,ORC1,AURKB,ASPM,KIF4A,SFRP2,FANCD2,CCDC86,CENPK,NDC80,FANCC,RASL10A,ARHGAP11A,TOP2A,CHAF1A,ERCC6L,CHEK1,CDC25C,CDCA3,CCNB1,MCM10,CCNA2,GAS1,OIP5,NTSR2,MYO1C,FKBP7,…
TF	Factor: E2F1; motif: NNNNNGCGSSAAAN; match class: 1	TF:M08874_1	6.109851454539775e-7	6.213969348392128	2158	438	88	19917	ZNF367,NRM,MCM8,WEE1,CDK1,FOXM1,POLA2,KIF20A,FANCD2,FANCC,CCNB1,DTL,CDCA5,MASTL,MYBL2,PIM1,SNRPB,ATAD2,LMNB1,PCNA,E2F2,FANCI,GEMIN6,TIMELESS,SF3B3,WDR62,BORA,RFWD3,PPM1D,MCM2,TCF19,MCM3,EIF4A1,MCM5,KNTC1,RNASEH2A,LRR1,NR3C2,PCLAF,MXD3,EGLN3,DEK,TRIM26,DLGAP5,UBALD2,RFC3,PFN1,SLC1A4,TMEM47,LOXL2,CNOT1,E2F7,CDC25A,BLOC1S5,E2F3,DNMT1,ITPRID2,TRMT6,CDT1,CLSPN,E2F1,FBXO5,TEAD4,BTG3,EZH2,KMT5A,POLH,DBF…
TF	Factor: YB-1; motif: CCAMTCNGMR; match class: 1	TF:M03805_1	6.806255533436001e-7	6.1670917498217666	3731	438	131	19917	DDIAS,AURKA,ASF1B,TP53I3,CENPA,SHCBP1,NCAPH,CEP55,FOXM1,CCNB2,KIF20A,TPX2,CHST1,CKS2,TGFB1I1,PIMREG,CHEK2,HJURP,AURKB,ASPM,CENPK,NDC80,FANCC,TOP2A,CHAF1A,ERCC6L,IQGAP3,CDC25C,CDCA3,CCNB1,MYO1C,PLK1,SPC24,DEPDC1B,SMC4,NCAPG,CDCA2,MLC1,MKI67,ESPL1,HMMR,CENPF,HMGA1,POC1A,CKAP2L,ATAD2,BRIP1,ZDHHC5,CENPM,NCAPD2,PCNA,ECT2,PRIM2,CDC45,PON1,CDC6,IGIP,KPNA2,SF3B3,ALDH2,KLF10,WDR62,ZWILCH,RFWD3,TACC3,CKS1B…
TF	Factor: NF-Y; motif: NNNRRCCAATSRGNNN	TF:M00287	8.32368501128555e-7	6.079684362920874	1666	438	73	19917	DDIAS,MCM8,ASF1B,CENPA,CDK1,NCAPH,CEP55,KIF14,CCNB2,KIF20A,TPX2,CKS2,TGFB1I1,PIMREG,CHEK2,ARHGAP11A,TOP2A,PLK1,UBE2C,DTL,CDCA2,ESPL1,CENPF,KIF23,POC1A,CKAP2L,ATAD2,ZDHHC5,CENPM,NCAPD2,LMNB2,TK1,CDC6,KPNA2,RFWD3,TACC3,NEK2,CKS1B,HMGB2,CDCA4,MGAT4C,MCM3,EIF4A1,CDKN3,RACGAP1,DAXX,DEK,WDHD1,UBALD2,CD93,E2F7,ORC6,CKAP2,CDC25A,E2F3,PLSCR3,TRMT6,CCNF,MTFR2,FAM72D,FAAP24,CCT6A,GABRG1,NCAPD3,SOGA1,RARS2,A…
TF	Factor: E2F-2; motif: GCGCGCGCNCS	TF:M11529	8.631962854120254e-7	6.063890437218254	16407	438	402	19917	ZNF367,AURKA,NRM,HASPIN,MCM8,ASF1B,NUF2,PTTG1,TP53I3,CENPA,WEE1,PKN3,SHCBP1,CDK2,CDK1,NCAPH,CDCA8,CEP55,FOXM1,KIF14,CCNB2,POLA2,KIF20A,TPX2,CHST1,DSN1,SGO1,CKS2,GTSE1,KIFC1,TGFB1I1,PRC1,PIMREG,NUSAP1,KIF2C,BIRC5,CHEK2,HJURP,KIF11,MELK,ORC1,AURKB,ASPM,KIF4A,SFRP2,FANCD2,CCDC86,CENPK,NDC80,FANCC,RASL10A,ARHGAP11A,TOP2A,CHAF1A,ERCC6L,CHEK1,IQGAP3,PCOLCE,TROAP,CDC25C,CDCA3,CCNB1,MCM10,CCNA2,GAS1,OIP5…
TF	Factor: DP-1; motif: NRNNGGCGGGAANN	TF:M10098	0.000001100633414519467	5.958357306424795	7103	438	213	19917	ZNF367,NRM,HASPIN,MCM8,ASF1B,NUF2,TP53I3,CENPA,WEE1,PKN3,SHCBP1,NCAPH,CEP55,POLA2,CHST1,DSN1,SGO1,PIMREG,NUSAP1,CHEK2,MELK,AURKB,KIF4A,SFRP2,FANCD2,CCDC86,FANCC,RASL10A,TOP2A,CHAF1A,ERCC6L,CHEK1,PCOLCE,CDCA3,CCNA2,GAS1,OIP5,SKA1,WDR76,CEP152,CDCA2,CDCA5,MASTL,MKI67,TRIP13,PIM1,RIOK1,SNRPB,RAD51AP1,RAD51,CKAP2L,ATAD2,NCAPD2,LMNB1,PCNA,ALDOC,CENPN,PRIM2,C5ORF34,CDC45,CBFB,FANCI,CENPH,SGO2,TIMELESS,…
TF	Factor: E2F-4; motif: GCGGGAAANA; match class: 1	TF:M02090_1	0.0000011714790486094478	5.9312654741644755	6427	438	197	19917	ZNF367,NRM,HASPIN,MCM8,ASF1B,CENPA,PKN3,CDK2,CDCA8,FOXM1,KIF20A,CHST1,PRC1,PIMREG,CHEK2,MELK,SFRP2,FANCC,RASL10A,TOP2A,PCOLCE,CCNB1,CCNA2,GAS1,NTSR2,FKBP7,WDR76,UBE2C,SKA3,DTL,NCAPG,CDCA5,MASTL,MYBL2,TRIP13,ESPL1,HMMR,MGME1,PIM1,CEP135,HMGA1,SNRPB,CKAP2L,ATAD2,EXO1,CENPM,NCAPD2,LMNB1,ECT2,ALDOC,PRIM2,FANCI,CENPH,FRMD8,SLC26A2,TK1,TIMELESS,ZYX,ETNPPL,DAP3,CCND1,SF3B3,KLF10,WDR62,DSCC1,BORA,REXO5,T…
TF	Factor: TCF-1; motif: ACATCGRGRCGCTGW; match class: 1	TF:M11603_1	0.0000012306372741568106	5.909869934920456	13293	438	345	19917	ZNF367,AURKA,NRM,HASPIN,MCM8,ASF1B,NUF2,TP53I3,CENPA,WEE1,PKN3,SHCBP1,CDK1,NCAPH,CDCA8,FOXM1,CCNB2,KIF20A,TPX2,CHST1,DSN1,SGO1,CKS2,GTSE1,KIFC1,PRC1,PIMREG,NUSAP1,CHEK2,HJURP,KIF11,MELK,ORC1,AURKB,ASPM,KIF4A,SFRP2,FANCD2,CCDC86,NDC80,FANCC,RASL10A,TOP2A,CHAF1A,ERCC6L,CHEK1,IQGAP3,PCOLCE,CDC25C,CDCA3,CCNA2,GAS1,OIP5,NTSR2,MYO1C,FKBP7,PLK1,CEP152,SPC24,ZWINT,DEPDC1B,SMC4,UBE2C,SKA3,DTL,BUB1,NCAPG,C…
TF	Factor: EHF; motif: CSCGGAARTN; match class: 1	TF:M02052_1	0.0000013643142201036208	5.865085594238825	4086	438	139	19917	HASPIN,MCM8,ASF1B,NUF2,WEE1,CDCA8,SGO1,CKS2,KIFC1,ORC1,FANCD2,FANCC,ARHGAP11A,CDCA3,PLK1,CEP152,DEPDC1B,BUB1,CDCA5,MASTL,MYBL2,RIOK1,SNRPB,KIF23,POC1A,RAD51,ATAD2,ZDHHC5,NCAPD2,ZPR1,RRM2,KIF20B,PARPBP,LMNB2,PRIM2,C5ORF34,CDC45,KNL1,FANCI,CENPL,FRMD8,SLC26A2,SGO2,ZYX,DAP3,MLX,SF3B3,NKIRAS2,DSCC1,RPIA,REXO5,RFWD3,CKS1B,POLQ,MND1,MCM3,EIF4A1,MCM5,CDKN3,RFC2,NDP,TRAIP,C18ORF54,WDR12,KNSTRN,A2ML1,DAXX…
TF	Factor: E2F-7; motif: GRGGCGGGAANNN	TF:M09896	0.0000013643142201036208	5.865085594238825	10034	438	278	19917	ZNF367,NRM,HASPIN,MCM8,ASF1B,NUF2,TP53I3,CENPA,WEE1,PKN3,SHCBP1,CDK2,CDK1,NCAPH,CDCA8,CEP55,POLA2,CHST1,DSN1,SGO1,GTSE1,KIFC1,TGFB1I1,PIMREG,NUSAP1,BIRC5,CHEK2,MELK,AURKB,KIF4A,SFRP2,FANCD2,CCDC86,FANCC,RASL10A,TOP2A,CHAF1A,ERCC6L,CHEK1,IQGAP3,PCOLCE,CDCA3,MCM10,CCNA2,GAS1,OIP5,MYO1C,SKA1,WDR76,PLK1,CEP152,SMC4,UBE2C,SKA3,DTL,BUB1,CDCA2,CDCA5,MASTL,MYBL2,MKI67,TRIP13,CENPF,PIM1,RIOK1,CEP135,HMGA1…
TF	Factor: E2F-3; motif: NNGGCGGGAAA; match class: 1	TF:M09893_1	0.0000015010864308801416	5.823594300845579	1336	438	62	19917	ASF1B,CENPA,WEE1,ORC1,SFRP2,FANCC,MYBL2,SNRPB,LMNB1,CENPH,ZYX,BORA,HMGB2,SREBF1,CDCA4,TCF19,MCM3,KNTC1,RNASEH2A,MIS18A,LRR1,DEK,HAUS8,RFC3,PFN1,LOXL2,BRCA1,DDX19B,CDT1,CLSPN,TEAD4,NCAPG2,FAM72D,EZH2,RAD54L,KMT5A,DBF4,SDC1,MCM4,HAUS1,FANCA,NEMP1,FOXD2,MKX,XRCC2,NIBAN2,ELOVL2,MSH6,UTP4,CDC7,PRR11,TUBB,RFC4,CKLF,HROB,C1QBP,GINS2,STIP1,PLAU,RAN,WDR53,KPNB1
TF	Factor: E2F-4; motif: NNTTCCCGCCNN; match class: 1	TF:M04823_1	0.0000015010864308801416	5.823594300845579	7916	438	231	19917	ZNF367,DDIAS,NRM,MCM8,ASF1B,TP53I3,CENPA,WEE1,PKN3,SHCBP1,CDK2,NCAPH,CDCA8,CEP55,CHST1,PRC1,NUSAP1,BIRC5,CHEK2,MELK,KIF4A,SFRP2,FANCC,RASL10A,TOP2A,CHAF1A,ERCC6L,CHEK1,PCOLCE,CDCA3,CCNA2,GAS1,OIP5,NTSR2,MYO1C,FKBP7,WDR76,PLK1,SMC4,UBE2C,SKA3,DTL,NCAPG,CDCA5,MASTL,MYBL2,MKI67,TRIP13,MGME1,PIM1,CEP135,SNRPB,RAD51AP1,KIF23,CKAP2L,ATAD2,ZDHHC5,CENPM,LMNB1,ALDOC,CENPN,PARPBP,C5ORF34,CDC45,FANCI,FRMD8,…
TF	Factor: Erg; motif: NACCGGAARYN	TF:M11392	0.0000017882143000521259	5.747580436461152	8777	438	250	19917	DDIAS,AURKA,NRM,MCM8,ASF1B,TP53I3,CENPA,WEE1,PKN3,SHCBP1,CDK2,CEP55,KIF14,POLA2,TPX2,DSN1,CKS2,GTSE1,KIFC1,TGFB1I1,PRC1,PIMREG,HJURP,MELK,ORC1,AURKB,KIF4A,FANCD2,CENPK,ARHGAP11A,CHAF1A,ERCC6L,CHEK1,CDCA3,CCNB1,MCM10,CCNA2,GAS1,MYO1C,SKA1,PLK1,DEPDC1B,SMC4,UBE2C,BUB1,NCAPG,CDCA2,CDCA5,MASTL,TRIP13,ESPL1,HMMR,MGME1,CENPF,RIOK1,CEP135,SNRPB,KIF23,KIF18A,POC1A,RAD51,ATAD2,TTK,EXO1,ZDHHC5,NCAPD2,LMNB1…
TF	Factor: E2F-6; motif: NGGGCGGGARRNN	TF:M09895	0.000002085234591982956	5.68084507916862	7857	438	229	19917	ZNF367,NRM,HASPIN,MCM8,ASF1B,TP53I3,CENPA,WEE1,PKN3,SHCBP1,NCAPH,CDCA8,CEP55,POLA2,CHST1,GTSE1,TGFB1I1,NUSAP1,BIRC5,CHEK2,MELK,AURKB,KIF4A,SFRP2,FANCD2,FANCC,RASL10A,TOP2A,CHAF1A,ERCC6L,CHEK1,IQGAP3,PCOLCE,CDCA3,CCNA2,GAS1,OIP5,SKA1,WDR76,PLK1,CEP152,DEPDC1B,UBE2C,SKA3,DTL,CDCA2,MASTL,MYBL2,MKI67,TRIP13,CENPF,PIM1,CEP135,SNRPB,RAD51AP1,KIF23,RAD51,CKAP2L,ATAD2,ZDHHC5,NCAPD2,LMNB1,PCNA,ALDOC,CENPN…
TF	Factor: E2F-1; motif: NTTSGCGG; match class: 1	TF:M00430_1	0.000002085234591982956	5.68084507916862	2541	438	97	19917	MCM8,ASF1B,CENPA,KIF20A,GTSE1,PRC1,KIF11,MELK,CHEK1,MCM10,WDR76,PLK1,ZWINT,SKA3,DTL,MGME1,CENPF,SNRPB,RAD51,CKAP2L,TTK,CENPM,ECT2,CENPN,E2F2,PRIM2,CDC45,CENPH,FRMD8,TK1,CDC6,ETNPPL,DAP3,KPNA2,POLR1H,CCND1,SF3B3,BUB1B,ZWILCH,BORA,HMGB2,PPM1D,MCM5,KNTC1,DAAM2,NR3C2,DAXX,COL4A1,C16ORF87,TRIM26,RTKN2,UBALD2,HSPG2,UFD1,STUM,CNOT1,E2F7,COL4A2,CDC25A,E2F3,DDX19B,PLSCR3,DYNLRB2,TPM4,DNMT1,TRMT6,CLSPN,KIF…
TF	Factor: E2F-1; motif: NNNNGGCGGGAARN; match class: 1	TF:M09892_1	0.000002149026767866546	5.667758174985833	9248	438	260	19917	ZNF367,DDIAS,AURKA,NRM,HASPIN,MCM8,ASF1B,TP53I3,CENPA,WEE1,PKN3,SHCBP1,CDK2,NCAPH,CDCA8,CEP55,CHST1,PRC1,PIMREG,NUSAP1,BIRC5,CHEK2,MELK,KIF4A,SFRP2,FANCC,RASL10A,TOP2A,CHAF1A,ERCC6L,CHEK1,PCOLCE,CDCA3,CCNA2,GAS1,OIP5,NTSR2,MYO1C,FKBP7,WDR76,PLK1,SMC4,UBE2C,SKA3,DTL,NCAPG,CDCA5,MASTL,MYBL2,MKI67,TRIP13,MGME1,CENPF,PIM1,CEP135,HMGA1,SNRPB,RAD51AP1,KIF23,CKAP2L,ATAD2,ZDHHC5,CENPM,NCAPD2,LMNB1,PCNA,A…
TF	Factor: GABP-alpha; motif: CTTCCK	TF:M01660	0.0000022327606619826344	5.6511578280934	11217	438	302	19917	DDIAS,AURKA,NRM,HASPIN,MCM8,ASF1B,NUF2,PTTG1,CENPA,WEE1,PKN3,SHCBP1,CDK2,CDCA8,CEP55,FOXM1,KIF14,CCNB2,TPX2,CHST1,SGO1,CKS2,GTSE1,KIFC1,TGFB1I1,PIMREG,NUSAP1,KIF2C,CHEK2,HJURP,MELK,ORC1,AURKB,KIF4A,FANCD2,CCDC86,NDC80,FANCC,RASL10A,ARHGAP11A,TOP2A,CHAF1A,ERCC6L,CDC25C,CDCA3,CCNB1,CCNA2,OIP5,MYO1C,FKBP7,SKA1,PLK1,CEP152,SPC24,ZWINT,DEPDC1B,UBE2C,SKA3,DTL,BUB1,NCAPG,CDCA2,CDCA5,MASTL,TRIP13,ESPL1,M…
TF	Factor: GABP-alpha; motif: CACTTCCGG	TF:M04698	0.000002897408401592292	5.5379902848939	3221	438	115	19917	DDIAS,AURKA,HASPIN,MCM8,ASF1B,NUF2,KIF14,CCNB2,TPX2,CHST1,SGO1,CKS2,GTSE1,KIFC1,FANCD2,FANCC,MYO1C,UBE2C,NCAPG,CDCA5,MASTL,RIOK1,SNRPB,KIF23,ZDHHC5,NCAPD2,ZPR1,PARPBP,LMNB2,PRIM2,C5ORF34,CDC45,KNL1,FANCI,ETNPPL,DAP3,SF3B3,NKIRAS2,REXO5,RFWD3,CKS1B,POLQ,ARHGEF39,EIF4A1,CDKN3,RFC2,TRAIP,RACGAP1,KNSTRN,A2ML1,DAXX,DIAPH1,RAD18,DEK,WDHD1,NSMCE2,NIP7,EDEM2,RTKN2,DLGAP5,BFAR,SIDT1,CD93,MAD2L1,UFD1,PMM2,…
TF	Factor: nerf; motif: NRRNSCGGAAGNRNNNN	TF:M09606	0.0000035394437489003903	5.451064985365442	6310	438	192	19917	AURKA,NRM,HASPIN,MCM8,ASF1B,NUF2,PKN3,SHCBP1,CDK2,CDCA8,CEP55,FOXM1,KIF14,SGO1,CKS2,GTSE1,KIFC1,TGFB1I1,PIMREG,KIF2C,CHEK2,MELK,ORC1,AURKB,KIF4A,FANCD2,FANCC,RASL10A,ARHGAP11A,TOP2A,ERCC6L,CDCA3,CCNB1,MYO1C,ZWINT,BUB1,NCAPG,CDCA5,MASTL,TRIP13,ESPL1,MGME1,RIOK1,SNRPB,KIF23,POC1A,RAD51,ATAD2,TTK,ZDHHC5,NCAPD2,ZPR1,KIF20B,PARPBP,LMNB2,PRIM2,C5ORF34,CDC45,CBFB,CDC20,KNL1,PON1,FANCI,CENPH,FRMD8,SLC26A…
TF	Factor: Fli-1; motif: NACCGGAWWTCCGGTY; match class: 1	TF:M11399_1	0.000004269613545439039	5.369611432393878	11613	438	309	19917	DDIAS,NRM,HASPIN,MCM8,ASF1B,NUF2,TP53I3,CENPA,WEE1,PKN3,SHCBP1,CDK1,CDCA8,CEP55,FOXM1,KIF14,POLA2,KIF20A,TPX2,CHST1,DSN1,CKS2,GTSE1,KIFC1,TGFB1I1,PRC1,PIMREG,NUSAP1,KIF2C,BIRC5,HJURP,MELK,ORC1,ASPM,KIF4A,SFRP2,CENPK,NDC80,RASL10A,TOP2A,CHEK1,PCOLCE,TROAP,CDCA3,CCNB1,CCNA2,GAS1,OIP5,MYO1C,FKBP7,SKA1,WDR76,PLK1,CEP152,DEPDC1B,SMC4,UBE2C,SKA3,DTL,NCAPG,CDCA5,MASTL,MYBL2,MLC1,TRIP13,HMMR,MGME1,PIM1,R…
TF	Factor: E2F-2; motif: NWTTTGGCGCCAWWNN; match class: 1	TF:M11530_1	0.000004280759536285673	5.368479167166231	13561	438	348	19917	ZNF367,DDIAS,AURKA,NRM,MCM8,TP53I3,CENPA,WEE1,PKN3,SHCBP1,CDK2,CDK1,NCAPH,CDCA8,CEP55,FOXM1,KIF14,CCNB2,POLA2,TPX2,CHST1,DSN1,CKS2,GTSE1,KIFC1,TGFB1I1,PRC1,PIMREG,NUSAP1,KIF2C,BIRC5,CHEK2,HJURP,KIF11,MELK,ORC1,AURKB,ASPM,KIF4A,FANCD2,CCDC86,CENPK,NDC80,FANCC,RASL10A,TOP2A,CHAF1A,ERCC6L,CHEK1,IQGAP3,PCOLCE,CDC25C,CDCA3,MCM10,CCNA2,GAS1,OIP5,NTSR2,MYO1C,WDR76,PLK1,CEP152,SPC24,ZWINT,DEPDC1B,SMC4,UB…
TF	Factor: TCF-1; motif: ACATCGRGRCGCTGW; match class: 1	TF:M11601_1	0.000005370948608356743	5.26994900312885	11153	438	299	19917	ZNF367,AURKA,HASPIN,MCM8,ASF1B,TP53I3,WEE1,PKN3,SHCBP1,NCAPH,CDCA8,FOXM1,KIF20A,TPX2,CHST1,DSN1,SGO1,CKS2,GTSE1,PRC1,PIMREG,NUSAP1,KIF2C,CHEK2,HJURP,KIF11,MELK,AURKB,ASPM,SFRP2,FANCD2,CCDC86,NDC80,RASL10A,TOP2A,CHAF1A,CHEK1,PCOLCE,CDC25C,CDCA3,GAS1,OIP5,NTSR2,MYO1C,PLK1,CEP152,ZWINT,SMC4,UBE2C,SKA3,DTL,BUB1,NCAPG,CDCA5,MASTL,MLC1,MKI67,TRIP13,ESPL1,HMMR,MGME1,PIM1,RIOK1,HMGA1,SNRPB,POC1A,RAD51,AT…
TF	Factor: Nkx2-3; motif: GNCGTTRAG	TF:M10635	0.0000053974149139137414	5.267814195257559	4660	438	151	19917	MCM8,ASF1B,SHCBP1,CDK2,KIF14,POLA2,TPX2,SGO1,CKS2,TGFB1I1,PRC1,NUSAP1,KIF2C,BIRC5,CHEK2,HJURP,ASPM,KIF4A,SFRP2,FANCD2,CCDC86,FANCC,ERCC6L,OIP5,PLK1,DEPDC1B,SMC4,SKA3,NCAPG,CDCA5,MASTL,MLC1,ESPL1,HMMR,PIM1,SNRPB,KIF18A,PBK,EXO1,ZDHHC5,NCAPD2,CENPN,LMNB2,KNL1,CENPH,CENPL,GEMIN6,SLC26A2,CDC6,SGO2,IGIP,CAV1,DAP3,KPNA2,POLR1H,CCND1,KLF10,DSCC1,BORA,REXO5,NEK2,HMGB2,MND1,JPT1,CENPW,FBLIM1,MCM3,CDKN3,RA…
TF	Factor: NF-YA; motif: NYRRCCAATCAGAR	TF:M10005	0.00000619945353879756	5.207646590428229	2280	438	88	19917	DDIAS,AURKA,MCM8,ASF1B,CENPA,CDK1,NCAPH,CDCA8,CEP55,KIF14,CCNB2,KIF20A,TPX2,CKS2,TGFB1I1,CHEK2,MELK,ASPM,ARHGAP11A,TOP2A,CHAF1A,CDCA3,PLK1,UBE2C,DTL,BUB1,CDCA2,MKI67,ESPL1,CENPF,KIF23,POC1A,CKAP2L,ATAD2,ZDHHC5,CENPM,NCAPD2,LMNB2,CDC45,TK1,CDC6,KPNA2,KLF10,REXO5,RFWD3,TACC3,NEK2,HMGB2,CDCA4,MGAT4C,MCM3,CDKN3,RACGAP1,DAXX,DEK,WDHD1,UBALD2,CD93,UFD1,SLC1A4,ORC6,CKAP2,CDC25A,E2F3,TRMT6,MTFR2,FAM72D,E…
TF	Factor: YB-1; motif: NNNNCCAATNN; match class: 1	TF:M03862_1	0.000006946064988002364	5.158261157708415	3164	438	112	19917	ZNF367,AURKA,MCM8,ASF1B,PTTG1,CENPA,CDK1,NCAPH,CEP55,FOXM1,KIF14,CCNB2,KIF20A,TPX2,CKS2,TGFB1I1,PIMREG,CHEK2,HJURP,MELK,AURKB,ASPM,CENPK,TOP2A,CHAF1A,ERCC6L,CDCA3,CCNB1,MCM10,ZWINT,UBE2C,DTL,CDCA2,CDCA5,MKI67,ESCO2,KIF23,CKAP2L,ZDHHC5,CENPM,NCAPD2,ECT2,PON1,SLC26A2,TK1,CDC6,SGO2,ETNPPL,MLX,BUB1B,KLF10,WDR62,BORA,RFWD3,NEK2,CKS1B,HMGB2,JPT1,TCF19,CENPW,MGAT4C,MCM3,EIF4A1,CDKN3,KNTC1,PAQR6,DAXX,MXD…
TF	Factor: p300; motif: ACNTCCG	TF:M04826	0.00000710758018627494	5.148278231987813	17982	438	424	19917	ZNF367,DDIAS,AURKA,HASPIN,MCM8,ASF1B,NUF2,PTTG1,CENPA,WEE1,PKN3,SHCBP1,CDK2,CDK1,NCAPH,CDCA8,CEP55,FOXM1,KIF14,CCNB2,POLA2,KIF20A,TPX2,CHST1,DSN1,SGO1,CKS2,GTSE1,KIFC1,TGFB1I1,PRC1,PIMREG,NUSAP1,KIF2C,BIRC5,CHEK2,HJURP,KIF11,MELK,ORC1,AURKB,ASPM,KIF4A,SFRP2,FANCD2,CCDC86,CENPK,FANCC,RASL10A,ARHGAP11A,TOP2A,CHAF1A,ERCC6L,CHEK1,IQGAP3,PCOLCE,CDC25C,CDCA3,CCNB1,MCM10,CCNA2,GAS1,OIP5,NTSR2,MYO1C,FKBP…
TF	Factor: TCF-1; motif: ACATCGRGRCGCTGW	TF:M11603	0.000007804787281202885	5.107638929098516	16517	438	401	19917	ZNF367,DDIAS,AURKA,NRM,HASPIN,MCM8,ASF1B,NUF2,PTTG1,TP53I3,CENPA,WEE1,PKN3,SHCBP1,CDK2,CDK1,NCAPH,CDCA8,CEP55,FOXM1,KIF14,CCNB2,POLA2,KIF20A,TPX2,CHST1,DSN1,SGO1,CKS2,GTSE1,KIFC1,TGFB1I1,PRC1,PIMREG,NUSAP1,CHEK2,HJURP,KIF11,MELK,ORC1,AURKB,ASPM,KIF4A,SFRP2,FANCD2,CCDC86,CENPK,NDC80,FANCC,RASL10A,ARHGAP11A,TOP2A,CHAF1A,ERCC6L,CHEK1,IQGAP3,PCOLCE,CDC25C,CDCA3,CCNB1,MCM10,CCNA2,GAS1,OIP5,NTSR2,MYO1C…
TF	Factor: NF-YA; motif: YTCTSATTGGYYRN	TF:M04683	0.000008229071932482115	5.084649141376924	1706	438	71	19917	DDIAS,AURKA,ASF1B,CENPA,CDK1,NCAPH,KIF14,CCNB2,KIF20A,TPX2,CKS2,TGFB1I1,CHEK2,MELK,ASPM,ARHGAP11A,TOP2A,CHAF1A,PLK1,DEPDC1B,UBE2C,DTL,CDCA2,CENPF,KIF23,POC1A,ATAD2,ZDHHC5,CENPM,NCAPD2,LMNB2,CDC45,TK1,CDC6,KPNA2,RFWD3,TACC3,NEK2,CKS1B,HMGB2,CDCA4,MGAT4C,MCM3,CDKN3,RACGAP1,DAXX,DEK,WDHD1,DLGAP5,UBALD2,UFD1,SLC1A4,ORC6,CDC25A,E2F3,MTFR2,FAM72D,FAAP24,GABRG1,ZNF90,LIX1,RARS2,ADCYAP1R1,PINX1,PRR11,MAN…
TF	Factor: Erg; motif: NACCGGAARTN	TF:M11396	0.000008229071932482115	5.084649141376924	10863	438	292	19917	DDIAS,AURKA,NRM,HASPIN,MCM8,ASF1B,NUF2,TP53I3,CENPA,WEE1,PKN3,SHCBP1,CDK2,CEP55,KIF14,CCNB2,POLA2,TPX2,DSN1,SGO1,CKS2,GTSE1,KIFC1,TGFB1I1,PRC1,PIMREG,HJURP,KIF11,MELK,ORC1,AURKB,ASPM,KIF4A,FANCD2,CENPK,NDC80,FANCC,ARHGAP11A,CHAF1A,ERCC6L,CHEK1,IQGAP3,CDC25C,CDCA3,CCNB1,MCM10,CCNA2,GAS1,MYO1C,FKBP7,SKA1,PLK1,DEPDC1B,SMC4,UBE2C,NCAPG,CDCA2,CDCA5,MASTL,MLC1,TRIP13,ESPL1,HMMR,MGME1,PIM1,RIOK1,CEP135,…
TF	Factor: E2F-1; motif: NTTTTGGCGCCAWWWN	TF:M11533	0.000009058001457779273	5.042967613758444	13223	438	340	19917	ZNF367,DDIAS,AURKA,MCM8,ASF1B,NUF2,TP53I3,CENPA,WEE1,PKN3,SHCBP1,CDK2,CDK1,NCAPH,CDCA8,CEP55,FOXM1,KIF14,CCNB2,POLA2,KIF20A,TPX2,CHST1,DSN1,SGO1,CKS2,GTSE1,KIFC1,TGFB1I1,PRC1,NUSAP1,CHEK2,HJURP,KIF11,MELK,ORC1,AURKB,ASPM,KIF4A,FANCD2,CENPK,NDC80,FANCC,RASL10A,TOP2A,CHAF1A,ERCC6L,CHEK1,IQGAP3,PCOLCE,TROAP,CDC25C,MCM10,CCNA2,GAS1,OIP5,MYO1C,WDR76,PLK1,CEP152,SPC24,ZWINT,DEPDC1B,SMC4,UBE2C,SKA3,DTL,…
TF	Factor: ETF; motif: GVGGMGG	TF:M00695	0.000009516166697501216	5.021537958903495	10500	438	284	19917	ZNF367,DDIAS,HASPIN,WEE1,PKN3,SHCBP1,CDK1,NCAPH,CDCA8,CEP55,FOXM1,KIF14,TPX2,CHST1,DSN1,SGO1,CKS2,GTSE1,PRC1,PIMREG,NUSAP1,KIF2C,BIRC5,CHEK2,HJURP,MELK,KIF4A,SFRP2,CENPK,RASL10A,CHAF1A,CDCA3,CCNB1,MCM10,CCNA2,GAS1,OIP5,NTSR2,MYO1C,SKA1,WDR76,PLK1,UBE2C,SKA3,DTL,BUB1,NCAPG,CDCA5,MASTL,MYBL2,MKI67,TRIP13,ESPL1,HMMR,MGME1,CENPF,PIM1,RIOK1,CEP135,HMGA1,SNRPB,RAD51AP1,KIF23,POC1A,ATAD2,ZDHHC5,ZPR1,LMN…
TF	Factor: GABP-alpha; motif: NNNRCCGGAAGTGN	TF:M09935	0.000009612860922377212	5.017147340958607	4467	438	145	19917	DDIAS,AURKA,HASPIN,MCM8,ASF1B,NUF2,CDK2,CEP55,KIF14,CCNB2,TPX2,CHST1,SGO1,CKS2,GTSE1,KIFC1,TGFB1I1,PIMREG,MELK,AURKB,KIF4A,FANCD2,FANCC,ARHGAP11A,MYO1C,UBE2C,NCAPG,CDCA5,MASTL,TRIP13,ESPL1,RIOK1,SNRPB,KIF23,POC1A,TTK,ZDHHC5,NCAPD2,ZPR1,KIF20B,LMNB2,PRIM2,C5ORF34,CDC45,CDC20,KNL1,FANCI,ZYX,ETNPPL,DAP3,MLX,SF3B3,ZWILCH,NKIRAS2,REXO5,RFWD3,TACC3,TONSL,CKS1B,POLQ,ARHGEF39,EIF4A1,RFC2,TRAIP,KNTC1,RACG…
TF	Factor: Pax-3; motif: NNNNNNCGTCACGSTYNNNNN; match class: 1	TF:M00327_1	0.000010389826771380853	4.983391693334119	6960	438	205	19917	ZNF367,DDIAS,AURKA,HASPIN,MCM8,ASF1B,NUF2,CENPA,PKN3,CDCA8,CEP55,FOXM1,CCNB2,POLA2,KIF20A,TPX2,DSN1,SGO1,CKS2,KIFC1,TGFB1I1,PRC1,NUSAP1,BIRC5,HJURP,MELK,ASPM,KIF4A,FANCD2,CCDC86,CENPK,RASL10A,TOP2A,CHAF1A,CCNA2,OIP5,CEP152,SMC4,DTL,NCAPG,CDCA2,MYBL2,MKI67,ESCO2,HMMR,MGME1,PIM1,RIOK1,HMGA1,SNRPB,RAD51AP1,KIF18A,RAD51,CKAP2L,TTK,PBK,EXO1,CENPM,LMNB1,PCNA,CBFB,KNL1,CENPH,FRMD8,SLC26A2,CDC6,SGO2,CAV1…
TF	Factor: E2F-1:DP-2; motif: TTTSSCGC	TF:M00737	0.00001101066901062001	4.958186292400314	8859	438	248	19917	ZNF367,DDIAS,AURKA,NRM,HASPIN,MCM8,ASF1B,CENPA,WEE1,PKN3,SHCBP1,CDK1,CEP55,FOXM1,POLA2,KIF20A,TPX2,DSN1,SGO1,GTSE1,KIFC1,TGFB1I1,NUSAP1,KIF2C,CHEK2,MELK,KIF4A,SFRP2,FANCD2,NDC80,FANCC,ARHGAP11A,CHAF1A,CHEK1,MCM10,GAS1,OIP5,MYO1C,PLK1,DEPDC1B,SKA3,DTL,NCAPG,CDCA5,MASTL,MYBL2,MKI67,ESPL1,CENPF,PIM1,RIOK1,HMGA1,SNRPB,RAD51AP1,RAD51,ATAD2,TTK,PBK,EXO1,BRIP1,ZDHHC5,CENPM,LMNB1,PCNA,RRM2,KIF20B,CENPN,E…
TF	Factor: pax-6; motif: NYACGCNYSANYGMNCN; match class: 1	TF:M11882_1	0.000011472936310599343	4.94032541729575	11519	438	305	19917	ZNF367,DDIAS,AURKA,NRM,HASPIN,MCM8,ASF1B,WEE1,PKN3,SHCBP1,NCAPH,CEP55,FOXM1,KIF14,CCNB2,POLA2,CHST1,DSN1,GTSE1,KIFC1,TGFB1I1,PRC1,PIMREG,CHEK2,HJURP,KIF11,MELK,AURKB,ASPM,KIF4A,SFRP2,CCDC86,CENPK,FANCC,RASL10A,CHAF1A,ERCC6L,CHEK1,IQGAP3,PCOLCE,CDC25C,CDCA3,CCNA2,GAS1,NTSR2,MYO1C,FKBP7,SKA1,WDR76,PLK1,CEP152,SPC24,DEPDC1B,SKA3,NCAPG,CDCA2,MASTL,MYBL2,MLC1,MKI67,TRIP13,ESCO2,ESPL1,HMMR,CENPF,PIM1,H…
TF	Factor: E2F-1:HES-7; motif: GGCRCGTGSYNNWNGGCGCSM; match class: 1	TF:M08525_1	0.000011523733278779561	4.938406802187421	15410	438	381	19917	ZNF367,DDIAS,AURKA,NRM,HASPIN,MCM8,ASF1B,PTTG1,TP53I3,CENPA,WEE1,PKN3,CDK2,NCAPH,CDCA8,CEP55,FOXM1,KIF14,CCNB2,POLA2,TPX2,CHST1,DSN1,SGO1,CKS2,GTSE1,KIFC1,TGFB1I1,PRC1,PIMREG,NUSAP1,KIF2C,BIRC5,CHEK2,HJURP,KIF11,MELK,ASPM,KIF4A,SFRP2,CCDC86,CENPK,NDC80,FANCC,RASL10A,CHAF1A,ERCC6L,CHEK1,PCOLCE,CDC25C,CDCA3,CCNB1,MCM10,CCNA2,GAS1,OIP5,NTSR2,MYO1C,WDR76,PLK1,CEP152,SPC24,ZWINT,DEPDC1B,SMC4,UBE2C,SKA…
TF	Factor: Egr-1; motif: ACCGCCC	TF:M04918	0.000011812114738197342	4.9276723431221345	5665	438	174	19917	ZNF367,DDIAS,NRM,MCM8,ASF1B,CENPA,WEE1,SHCBP1,CDK1,NCAPH,CDCA8,PIMREG,KIF2C,CHEK2,AURKB,ASPM,KIF4A,FANCC,RASL10A,CHAF1A,CHEK1,IQGAP3,CDC25C,GAS1,NTSR2,MYO1C,SKA1,CDCA5,MASTL,MKI67,TRIP13,ESPL1,CENPF,RIOK1,CEP135,HMGA1,SNRPB,RAD51,CKAP2L,ATAD2,CENPM,NCAPD2,LMNB1,PCNA,ECT2,RRM2,CENPN,CBFB,CENPL,FRMD8,SGO2,ZYX,KPNA2,IKBIP,ALDH2,WDR62,ZWILCH,DSCC1,REXO5,TONSL,HPSE2,PPM1D,SREBF1,ARHGEF39,CDCA4,TCF19,N…
TF	Factor: NF-YC; motif: NNRRCCAATCAGNR	TF:M10006	0.000011812114738197342	4.9276723431221345	2572	438	95	19917	ZNF367,DDIAS,AURKA,MCM8,ASF1B,CENPA,CDK1,NCAPH,CEP55,KIF14,CCNB2,KIF20A,TPX2,CKS2,TGFB1I1,PIMREG,CHEK2,MELK,ASPM,ARHGAP11A,TOP2A,CHAF1A,FKBP7,PLK1,DEPDC1B,UBE2C,DTL,BUB1,CDCA2,ESPL1,CENPF,KIF23,POC1A,CKAP2L,ATAD2,ZDHHC5,CENPM,NCAPD2,LMNB2,CDC45,TK1,CDC6,KPNA2,KLF10,REXO5,RFWD3,TACC3,NEK2,CKS1B,HMGB2,CDCA4,MGAT4C,MCM3,EIF4A1,MCM5,CDKN3,RACGAP1,DAXX,DEK,WDHD1,DLGAP5,UBALD2,CD93,UFD1,SLC1A4,E2F7,ORC…
TF	Factor: E2F; motif: GGCGSG; match class: 1	TF:M00803_1	0.000012147056904201798	4.915528934007688	10294	438	279	19917	ZNF367,NRM,HASPIN,ASF1B,CENPA,WEE1,PKN3,CDK1,NCAPH,CEP55,FOXM1,KIF14,POLA2,TPX2,CHST1,CKS2,GTSE1,KIFC1,PRC1,PIMREG,NUSAP1,BIRC5,CHEK2,HJURP,KIF11,MELK,ASPM,KIF4A,SFRP2,FANCD2,CENPK,FANCC,RASL10A,CHAF1A,CHEK1,MCM10,GAS1,OIP5,NTSR2,MYO1C,SKA1,WDR76,PLK1,ZWINT,DEPDC1B,SKA3,DTL,CDCA5,MASTL,MYBL2,MKI67,TRIP13,ESCO2,ESPL1,HMMR,MGME1,CENPF,PIM1,RIOK1,CEP135,HMGA1,KIF23,POC1A,RAD51,CKAP2L,ATAD2,ZDHHC5,CE…
TF	Factor: HSFY1; motif: TTTCGAACG	TF:M04012	0.000013459064643372333	4.8709851209691815	1016	438	49	19917	ZNF367,MCM8,PTTG1,DSN1,SGO1,KIF2C,CHEK2,ORC1,CENPK,NDC80,MCM10,NTSR2,SPC24,CDCA2,CDCA5,PBK,KNL1,CENPH,GEMIN6,SGO2,CAV1,VKORC1,NKIRAS2,BORA,REXO5,POLQ,CENPW,NR2C2AP,C18ORF54,WDR12,DIAPH1,UBALD2,MAD2L1,STUM,ORC6,FANCB,ITPRID2,TRMT6,CCNF,DGCR6,RAD54L,SPINDOC,FANCA,MCM6,SOGA1,SIKE1,TNFRSF12A,HROB,HMGN4
TF	Factor: E2F-4:DP-2; motif: TTTCSCGC	TF:M00739	0.000014194703921826481	4.8478736617121285	5682	438	174	19917	ZNF367,DDIAS,AURKA,NRM,HASPIN,MCM8,ASF1B,CENPA,WEE1,PKN3,SHCBP1,CDK1,CEP55,FOXM1,POLA2,KIF20A,TGFB1I1,NUSAP1,KIF4A,SFRP2,FANCD2,CCDC86,FANCC,ARHGAP11A,CHAF1A,CHEK1,OIP5,SKA3,DTL,NCAPG,CDCA5,MASTL,PIM1,SNRPB,RAD51AP1,RAD51,ATAD2,TTK,PBK,EXO1,CENPM,LMNB1,PCNA,KIF20B,CENPN,E2F2,C5ORF34,KNL1,FANCI,CENPH,GEMIN6,TK1,CDC6,TIMELESS,CCND1,SF3B3,WDR62,BORA,RPIA,RFWD3,HMGB2,PPM1D,SREBF1,MCM2,MND1,NR2C2AP,MC…
TF	Factor: E2F-3; motif: GGCGGGN	TF:M02089	0.000014194703921826481	4.8478736617121285	13271	438	340	19917	ZNF367,DDIAS,AURKA,NRM,MCM8,ASF1B,PTTG1,CENPA,WEE1,PKN3,CDK2,CDK1,NCAPH,CDCA8,CEP55,FOXM1,KIF14,TPX2,CHST1,DSN1,SGO1,CKS2,GTSE1,KIFC1,TGFB1I1,PRC1,PIMREG,NUSAP1,KIF2C,BIRC5,CHEK2,HJURP,KIF11,MELK,ORC1,AURKB,ASPM,KIF4A,CCDC86,FANCC,ARHGAP11A,TOP2A,ERCC6L,CHEK1,PCOLCE,CDC25C,CDCA3,CCNB1,MCM10,CCNA2,GAS1,OIP5,MYO1C,FKBP7,SKA1,WDR76,PLK1,CEP152,DEPDC1B,SMC4,UBE2C,DTL,BUB1,NCAPG,CDCA2,CDCA5,MASTL,MYBL…
TF	Factor: Elk-1; motif: NNCCGGAAGTN	TF:M11435	0.000014746416371243318	4.831313507773182	11838	438	311	19917	DDIAS,AURKA,NRM,HASPIN,MCM8,ASF1B,NUF2,PTTG1,CENPA,WEE1,PKN3,SHCBP1,CDK2,CDCA8,CEP55,FOXM1,KIF14,CCNB2,TPX2,CHST1,SGO1,CKS2,GTSE1,KIFC1,TGFB1I1,PIMREG,NUSAP1,KIF2C,CHEK2,HJURP,KIF11,MELK,ORC1,AURKB,ASPM,KIF4A,FANCD2,CCDC86,NDC80,FANCC,RASL10A,ARHGAP11A,TOP2A,CHAF1A,ERCC6L,CHEK1,CDC25C,CDCA3,CCNB1,CCNA2,GAS1,OIP5,MYO1C,FKBP7,SKA1,PLK1,CEP152,SPC24,ZWINT,DEPDC1B,SMC4,UBE2C,SKA3,DTL,BUB1,NCAPG,CDCA2…
TF	Factor: BEN; motif: CAGCGRNV; match class: 1	TF:M01240_1	0.000016016535010137027	4.795431432617658	13334	438	341	19917	ZNF367,DDIAS,AURKA,HASPIN,MCM8,ASF1B,NUF2,PTTG1,TP53I3,CENPA,WEE1,PKN3,SHCBP1,CDK2,CDK1,CDCA8,CEP55,CCNB2,POLA2,CHST1,DSN1,CKS2,GTSE1,KIFC1,TGFB1I1,PRC1,PIMREG,NUSAP1,KIF2C,BIRC5,CHEK2,HJURP,KIF11,MELK,AURKB,ASPM,KIF4A,SFRP2,FANCD2,CCDC86,CENPK,NDC80,FANCC,RASL10A,ARHGAP11A,TOP2A,CHAF1A,CHEK1,IQGAP3,TROAP,CDC25C,CCNB1,MCM10,CCNA2,GAS1,OIP5,NTSR2,MYO1C,FKBP7,SKA1,WDR76,SPC24,ZWINT,DEPDC1B,SMC4,UBE…
TF	Factor: TEL1; motif: CNCGGAANNN	TF:M02070	0.000016493908328956592	4.78267642351964	10938	438	292	19917	ZNF367,DDIAS,AURKA,HASPIN,MCM8,ASF1B,TP53I3,CENPA,WEE1,PKN3,SHCBP1,CDK2,CDK1,CEP55,FOXM1,KIF14,CCNB2,POLA2,KIF20A,TPX2,CHST1,DSN1,SGO1,CKS2,GTSE1,KIFC1,PIMREG,NUSAP1,BIRC5,KIF11,MELK,ORC1,AURKB,KIF4A,FANCD2,FANCC,RASL10A,ARHGAP11A,TOP2A,PCOLCE,CDCA3,CCNB1,MCM10,CCNA2,GAS1,OIP5,MYO1C,FKBP7,SKA1,WDR76,PLK1,SPC24,DEPDC1B,SMC4,UBE2C,DTL,BUB1,NCAPG,CDCA5,MASTL,MYBL2,TRIP13,ESPL1,HMMR,MGME1,CENPF,PIM1,…
TF	Factor: TCF-1; motif: ACATCGRGRCGCTGW	TF:M11601	0.00001833672169861268	4.736678306368627	14964	438	372	19917	ZNF367,AURKA,HASPIN,MCM8,ASF1B,NUF2,TP53I3,WEE1,PKN3,SHCBP1,CDK1,NCAPH,CDCA8,FOXM1,CCNB2,POLA2,KIF20A,TPX2,CHST1,DSN1,SGO1,CKS2,GTSE1,KIFC1,TGFB1I1,PRC1,PIMREG,NUSAP1,KIF2C,CHEK2,HJURP,KIF11,MELK,AURKB,ASPM,SFRP2,FANCD2,CCDC86,CENPK,NDC80,FANCC,RASL10A,TOP2A,CHAF1A,ERCC6L,CHEK1,PCOLCE,CDC25C,CDCA3,CCNB1,MCM10,GAS1,OIP5,NTSR2,MYO1C,FKBP7,PLK1,CEP152,ZWINT,DEPDC1B,SMC4,UBE2C,SKA3,DTL,BUB1,NCAPG,CDC…
TF	Factor: ELK-1; motif: ACCGGAAGTN	TF:M02059	0.000019791493511084118	4.703521431708279	9512	438	261	19917	DDIAS,AURKA,NRM,HASPIN,MCM8,ASF1B,NUF2,TP53I3,CENPA,WEE1,PKN3,SHCBP1,CDK2,CEP55,KIF14,CCNB2,TPX2,CHST1,SGO1,CKS2,GTSE1,KIFC1,TGFB1I1,PRC1,PIMREG,NUSAP1,HJURP,KIF11,MELK,ORC1,AURKB,KIF4A,FANCD2,CENPK,FANCC,ARHGAP11A,CHAF1A,ERCC6L,CDC25C,CDCA3,CCNB1,MCM10,CCNA2,OIP5,MYO1C,FKBP7,SKA1,PLK1,DEPDC1B,SMC4,UBE2C,BUB1,NCAPG,CDCA2,CDCA5,MASTL,TRIP13,ESPL1,HMMR,MGME1,RIOK1,CEP135,HMGA1,SNRPB,KIF23,KIF18A,PO…
TF	Factor: NRF-1; motif: GCGCMTGCGCN	TF:M07052	0.000021356997955895022	4.670459793910202	2141	438	82	19917	AURKA,HASPIN,NCAPH,POLA2,DSN1,CKS2,GTSE1,CCDC86,ERCC6L,CCNB1,NTSR2,SKA1,SPC24,ZWINT,SMC4,SKA3,DTL,MKI67,HMMR,CENPF,RAD51AP1,PCNA,CENPN,CBFB,KNL1,TIMELESS,DAP3,MLX,CKS1B,PPM1D,SREBF1,CDCA4,TCF19,C18ORF54,MIS18A,WDR12,RAD18,MXD3,C16ORF87,WDHD1,NSMCE2,EDEM2,KBTBD11,MAD2L1,BPHL,PFN1,CNOT1,ORC6,CKAP2,BLOC1S5,NEIL3,DYNLRB2,SSH2,DNMT1,CCNF,CDT1,FBXO5,DGCR6,GLE1,EZH2,UBE2T,POLH,MCM4,NOB1,FANCA,MCM6,NCAPD…
TF	Factor: Erg; motif: NACCGGATATCCGGTN	TF:M11397	0.000021922550107627963	4.659108928597587	12122	438	316	19917	DDIAS,NRM,HASPIN,MCM8,ASF1B,NUF2,TP53I3,CENPA,WEE1,PKN3,CDK1,CEP55,FOXM1,KIF14,POLA2,KIF20A,TPX2,CHST1,GTSE1,KIFC1,TGFB1I1,PIMREG,NUSAP1,KIF2C,BIRC5,HJURP,MELK,ORC1,ASPM,KIF4A,SFRP2,CENPK,NDC80,FANCC,RASL10A,TOP2A,CHAF1A,CHEK1,PCOLCE,TROAP,CDCA3,CCNB1,MCM10,CCNA2,GAS1,OIP5,MYO1C,WDR76,PLK1,CEP152,DEPDC1B,SMC4,UBE2C,SKA3,DTL,NCAPG,CDCA5,MASTL,MYBL2,MLC1,TRIP13,HMMR,MGME1,PIM1,RIOK1,CEP135,HMGA1,SN…
TF	Factor: PEA3; motif: NACCGGAAGTN	TF:M11430	0.000023203655776884484	4.634443585856935	10973	438	292	19917	ZNF367,DDIAS,AURKA,NRM,HASPIN,MCM8,ASF1B,NUF2,TP53I3,CENPA,WEE1,PKN3,SHCBP1,CDK2,NCAPH,CEP55,KIF14,CCNB2,TPX2,CHST1,SGO1,CKS2,GTSE1,KIFC1,TGFB1I1,PRC1,PIMREG,KIF2C,HJURP,KIF11,MELK,ORC1,AURKB,ASPM,KIF4A,FANCD2,CENPK,NDC80,FANCC,RASL10A,ARHGAP11A,CHAF1A,ERCC6L,CHEK1,CDC25C,CDCA3,CCNB1,CCNA2,GAS1,MYO1C,FKBP7,SKA1,PLK1,CEP152,DEPDC1B,SMC4,UBE2C,DTL,NCAPG,CDCA2,CDCA5,MASTL,MLC1,MKI67,TRIP13,ESPL1,HMM…
TF	Factor: Erg; motif: NACCGGATATCCGGTN; match class: 1	TF:M11397_1	0.000025687917596393867	4.59027110060135	11846	438	310	19917	DDIAS,NRM,HASPIN,MCM8,ASF1B,NUF2,TP53I3,CENPA,WEE1,PKN3,CDK1,CEP55,FOXM1,KIF14,POLA2,KIF20A,TPX2,CHST1,GTSE1,KIFC1,TGFB1I1,PIMREG,NUSAP1,KIF2C,BIRC5,HJURP,MELK,ORC1,ASPM,KIF4A,SFRP2,CENPK,NDC80,FANCC,RASL10A,TOP2A,CHEK1,PCOLCE,TROAP,CDCA3,CCNB1,MCM10,CCNA2,GAS1,OIP5,MYO1C,WDR76,PLK1,CEP152,DEPDC1B,SMC4,UBE2C,SKA3,DTL,NCAPG,CDCA5,MASTL,MYBL2,MLC1,TRIP13,HMMR,MGME1,PIM1,RIOK1,CEP135,HMGA1,SNRPB,KIF…
TF	Factor: E2F-3:TBR2; motif: ANGTGYKANGGCGCSTTNNCRNNT	TF:M08207	0.00002641338805160573	4.578175888162877	17225	438	411	19917	ZNF367,DDIAS,AURKA,NRM,HASPIN,MCM8,ASF1B,PTTG1,CENPA,WEE1,PKN3,SHCBP1,CDK2,CDK1,NCAPH,CDCA8,CEP55,FOXM1,KIF14,CCNB2,POLA2,KIF20A,CHST1,DSN1,SGO1,CKS2,GTSE1,KIFC1,TGFB1I1,PRC1,PIMREG,NUSAP1,KIF2C,BIRC5,CHEK2,HJURP,KIF11,MELK,ORC1,AURKB,ASPM,KIF4A,SFRP2,FANCD2,CCDC86,CENPK,FANCC,RASL10A,ARHGAP11A,TOP2A,CHAF1A,ERCC6L,CHEK1,PCOLCE,CDC25C,CDCA3,CCNB1,MCM10,CCNA2,GAS1,OIP5,NTSR2,MYO1C,FKBP7,SKA1,WDR76,…
TF	Factor: Elk-1; motif: NRSCGGAAGNN; match class: 1	TF:M11434_1	0.00002646236292064726	4.577371378682902	2959	438	104	19917	MCM8,ASF1B,NUF2,CDCA8,CKS2,KIFC1,TGFB1I1,HJURP,MELK,ORC1,FANCD2,FANCC,ARHGAP11A,PLK1,BUB1,MASTL,TRIP13,MGME1,RIOK1,SNRPB,KIF23,RAD51,ZDHHC5,NCAPD2,ZPR1,RRM2,KIF20B,PRIM2,CDC20,KNL1,FANCI,SLC26A2,SGO2,ZYX,MLX,SF3B3,NKIRAS2,DSCC1,REXO5,TACC3,CKS1B,MND1,MCM5,CDKN3,RFC2,KNSTRN,DEK,NIP7,DLGAP5,KBTBD11,SIDT1,MAD2L1,PMM2,PFN1,EME1,USB1,CFAP20,SERPINH1,KDM4D,DDX19B,PLSCR3,SSH2,DNMT1,FANCB,ITPRID2,PAK1IP1…
TF	Factor: E2F-8; motif: NTTTCCCGCCAAAW	TF:M11536	0.000028723336731235475	4.541765110398086	387	438	26	19917	WEE1,SHCBP1,CHAF1A,CHEK1,WDR76,SKA3,RAD51AP1,RAD51,ECT2,CENPH,PPM1D,MCM5,KNTC1,DAXX,DEK,DDX19B,CCNF,CDT1,EZH2,CCT6A,MCM4,FANCA,HELLS,XRCC2,MSH6,PRIM1
TF	Factor: EHF; motif: CSCGGAARTN	TF:M02052	0.00002900720817767897	4.537494068211274	10199	438	275	19917	ZNF367,DDIAS,AURKA,NRM,HASPIN,MCM8,ASF1B,NUF2,PTTG1,CENPA,WEE1,PKN3,SHCBP1,CDK2,CDCA8,CEP55,FOXM1,KIF14,CCNB2,TPX2,CHST1,SGO1,CKS2,GTSE1,KIFC1,TGFB1I1,PIMREG,KIF2C,CHEK2,HJURP,MELK,ORC1,AURKB,KIF4A,FANCD2,NDC80,FANCC,RASL10A,ARHGAP11A,TOP2A,CHAF1A,ERCC6L,TROAP,CDCA3,MCM10,CCNA2,MYO1C,FKBP7,SKA1,PLK1,CEP152,SPC24,ZWINT,DEPDC1B,SMC4,UBE2C,SKA3,DTL,BUB1,NCAPG,CDCA5,MASTL,MYBL2,TRIP13,MGME1,CENPF,PIM…
TF	Factor: A-Myb:Elf-1; motif: NMCCGGAACCGTTA; match class: 1	TF:M08390_1	0.00002921734850615981	4.534359199127014	4844	438	152	19917	ZNF367,HASPIN,MCM8,NUF2,CENPA,WEE1,SHCBP1,FOXM1,CCNB2,SGO1,CKS2,GTSE1,KIFC1,CHEK2,MELK,ORC1,ASPM,SFRP2,FANCD2,ARHGAP11A,TOP2A,ERCC6L,CCNB1,MCM10,GAS1,SKA1,CEP152,DTL,BUB1,NCAPG,CDCA2,MASTL,TRIP13,HMMR,RIOK1,CEP135,SNRPB,TTK,EXO1,ZDHHC5,CENPM,NCAPD2,ZPR1,LMNB1,CENPN,PARPBP,C5ORF34,CBFB,CDC20,FANCI,SLC26A2,SGO2,CAV1,ZYX,DAP3,POLR1H,SF3B3,BUB1B,WDR62,ZWILCH,RPIA,REXO5,TACC3,CKS1B,HMGB2,POLQ,PPM1D,MN…
TF	Factor: SAP-1; motif: NNCCGGAAGTGN	TF:M09905	0.00003574762535063776	4.446752802292755	8354	438	234	19917	DDIAS,AURKA,NRM,MCM8,ASF1B,CENPA,WEE1,PKN3,SHCBP1,CDK2,CEP55,KIF14,TPX2,DSN1,SGO1,CKS2,GTSE1,KIFC1,TGFB1I1,PRC1,PIMREG,HJURP,KIF11,MELK,ORC1,AURKB,KIF4A,FANCD2,FANCC,ARHGAP11A,TOP2A,CHAF1A,ERCC6L,CDCA3,CCNB1,CCNA2,MYO1C,SKA1,PLK1,DEPDC1B,SMC4,UBE2C,NCAPG,CDCA2,CDCA5,MASTL,TRIP13,ESPL1,HMMR,MGME1,RIOK1,CEP135,SNRPB,KIF23,KIF18A,POC1A,RAD51,ATAD2,TTK,EXO1,ZDHHC5,NCAPD2,ZPR1,LMNB1,ECT2,RRM2,KIF20B,P…
TF	Factor: E2F-3:TBR2; motif: ANGTGYKANGGCGCSTTNNCRNNT; match class: 1	TF:M08207_1	0.000035829478807009014	4.445759509246289	15626	438	383	19917	ZNF367,DDIAS,AURKA,NRM,HASPIN,MCM8,ASF1B,CENPA,WEE1,PKN3,SHCBP1,CDK2,CDK1,NCAPH,CDCA8,CEP55,FOXM1,KIF14,CCNB2,POLA2,CHST1,DSN1,SGO1,CKS2,GTSE1,KIFC1,TGFB1I1,PRC1,PIMREG,NUSAP1,KIF2C,BIRC5,CHEK2,HJURP,KIF11,MELK,ORC1,AURKB,ASPM,KIF4A,SFRP2,FANCD2,CCDC86,CENPK,FANCC,RASL10A,TOP2A,CHAF1A,ERCC6L,CHEK1,PCOLCE,CDC25C,CDCA3,CCNB1,CCNA2,GAS1,OIP5,NTSR2,MYO1C,FKBP7,SKA1,WDR76,PLK1,CEP152,SPC24,ZWINT,DEPDC…
TF	Factor: E2F-1; motif: NKTSSCGC	TF:M00428	0.00003626342207816108	4.44053121514575	9030	438	249	19917	ZNF367,DDIAS,AURKA,MCM8,ASF1B,WEE1,PKN3,SHCBP1,CDK2,CDK1,CDCA8,CEP55,FOXM1,POLA2,TPX2,SGO1,CKS2,KIFC1,PRC1,NUSAP1,HJURP,MELK,ORC1,SFRP2,CCDC86,CENPK,NDC80,FANCC,RASL10A,ARHGAP11A,TOP2A,CHAF1A,ERCC6L,CHEK1,IQGAP3,CDC25C,CCNB1,CCNA2,OIP5,NTSR2,MYO1C,WDR76,CEP152,SPC24,ZWINT,SMC4,SKA3,DTL,NCAPG,CDCA5,MKI67,HMMR,MGME1,PIM1,CEP135,KIF18A,POC1A,CKAP2L,ATAD2,PBK,EXO1,ZDHHC5,CENPM,LMNB1,PCNA,ECT2,RRM2,CE…
TF	Factor: Erm; motif: NNSCGGAWGYN	TF:M11424	0.0000367041404071946	4.435284942435289	8225	438	231	19917	DDIAS,AURKA,NRM,HASPIN,MCM8,ASF1B,NUF2,CENPA,PKN3,SHCBP1,CDK2,CDCA8,CEP55,FOXM1,KIF14,CCNB2,TPX2,CHST1,SGO1,CKS2,GTSE1,KIFC1,TGFB1I1,PIMREG,KIF2C,HJURP,MELK,ORC1,AURKB,ASPM,KIF4A,FANCD2,FANCC,RASL10A,ARHGAP11A,TOP2A,ERCC6L,CHEK1,CDCA3,CCNB1,GAS1,MYO1C,FKBP7,SKA1,PLK1,ZWINT,DEPDC1B,UBE2C,BUB1,NCAPG,CDCA2,CDCA5,MASTL,MLC1,MKI67,TRIP13,ESPL1,MGME1,RIOK1,CEP135,SNRPB,KIF23,POC1A,RAD51,TTK,ZDHHC5,NCAP…
TF	Factor: Fli-1; motif: NACCGGAARTN	TF:M11400	0.00003741954048141081	4.426901550016473	10042	438	271	19917	DDIAS,AURKA,NRM,MCM8,ASF1B,TP53I3,CENPA,WEE1,PKN3,SHCBP1,CDK2,CEP55,KIF14,POLA2,TPX2,DSN1,SGO1,CKS2,GTSE1,KIFC1,TGFB1I1,PRC1,PIMREG,HJURP,KIF11,MELK,ORC1,AURKB,KIF4A,FANCD2,CENPK,ARHGAP11A,CHAF1A,ERCC6L,CHEK1,IQGAP3,CDCA3,CCNB1,MCM10,CCNA2,GAS1,MYO1C,SKA1,PLK1,DEPDC1B,SMC4,UBE2C,BUB1,NCAPG,CDCA2,CDCA5,MASTL,MLC1,TRIP13,ESPL1,HMMR,MGME1,CENPF,PIM1,RIOK1,CEP135,SNRPB,RAD51AP1,KIF23,KIF18A,POC1A,RAD…
TF	Factor: Elf-1; motif: NAMCCGGAAGTN	TF:M11447	0.00003741954048141081	4.426901550016473	7786	438	221	19917	DDIAS,AURKA,NRM,HASPIN,MCM8,ASF1B,NUF2,CENPA,WEE1,PKN3,SHCBP1,CDK2,CDCA8,CEP55,KIF14,CCNB2,TPX2,CHST1,SGO1,CKS2,GTSE1,KIFC1,TGFB1I1,PIMREG,HJURP,MELK,ORC1,AURKB,KIF4A,FANCD2,FANCC,ARHGAP11A,TOP2A,ERCC6L,CDCA3,CCNB1,MYO1C,FKBP7,SKA1,PLK1,ZWINT,DEPDC1B,UBE2C,BUB1,NCAPG,CDCA2,CDCA5,MASTL,TRIP13,ESPL1,HMMR,MGME1,RIOK1,CEP135,SNRPB,KIF23,POC1A,RAD51,ATAD2,TTK,EXO1,ZDHHC5,NCAPD2,ZPR1,RRM2,KIF20B,PARPBP…
TF	Factor: Elf-1; motif: ACTTCCGGG	TF:M04714	0.00003785978321429779	4.4218218771419995	7876	438	223	19917	DDIAS,AURKA,NRM,HASPIN,MCM8,ASF1B,NUF2,CENPA,WEE1,PKN3,SHCBP1,CDK2,CEP55,FOXM1,KIF14,CCNB2,TPX2,CHST1,SGO1,CKS2,GTSE1,KIFC1,TGFB1I1,PIMREG,HJURP,MELK,ORC1,AURKB,KIF4A,FANCD2,FANCC,RASL10A,ARHGAP11A,CHAF1A,ERCC6L,CDCA3,CCNB1,MYO1C,SKA1,PLK1,DEPDC1B,SMC4,UBE2C,NCAPG,CDCA2,CDCA5,MASTL,TRIP13,ESPL1,MGME1,RIOK1,CEP135,SNRPB,KIF23,POC1A,RAD51,TTK,EXO1,ZDHHC5,NCAPD2,ZPR1,RRM2,KIF20B,PARPBP,LMNB2,PRIM2,C…
TF	Factor: Fli-1; motif: NACCGGAWWTCCGGTY	TF:M11399	0.0000458201671647768	4.338943330716074	13090	438	334	19917	DDIAS,NRM,HASPIN,MCM8,ASF1B,NUF2,TP53I3,CENPA,WEE1,PKN3,SHCBP1,CDK1,NCAPH,CDCA8,CEP55,FOXM1,KIF14,POLA2,KIF20A,TPX2,CHST1,DSN1,CKS2,GTSE1,KIFC1,TGFB1I1,PRC1,PIMREG,NUSAP1,KIF2C,BIRC5,CHEK2,HJURP,MELK,ORC1,ASPM,KIF4A,SFRP2,CENPK,NDC80,RASL10A,TOP2A,CHEK1,PCOLCE,TROAP,CDCA3,CCNB1,MCM10,CCNA2,GAS1,OIP5,MYO1C,FKBP7,SKA1,WDR76,PLK1,CEP152,SPC24,DEPDC1B,SMC4,UBE2C,SKA3,DTL,NCAPG,CDCA5,MASTL,MYBL2,MLC1,…
TF	Factor: ELF4; motif: NCCGGAARTN	TF:M02056	0.000047851426869186184	4.320105107580454	5379	438	164	19917	DDIAS,AURKA,HASPIN,MCM8,ASF1B,NUF2,WEE1,SHCBP1,KIF14,CCNB2,TPX2,CHST1,SGO1,CKS2,GTSE1,KIFC1,HJURP,KIF11,ORC1,FANCD2,FANCC,ARHGAP11A,CHAF1A,ERCC6L,MCM10,MYO1C,DEPDC1B,SMC4,UBE2C,NCAPG,CDCA5,MASTL,MYBL2,TRIP13,HMMR,CENPF,RIOK1,CEP135,SNRPB,KIF23,KIF18A,ATAD2,ZDHHC5,NCAPD2,ZPR1,LMNB1,ECT2,PARPBP,LMNB2,PRIM2,C5ORF34,CDC45,CBFB,FANCI,CENPH,CENPL,ETNPPL,DAP3,POLR1H,MLX,SF3B3,WDR62,NKIRAS2,DSCC1,BORA,RP…
TF	Factor: NRF-1; motif: CNSTGCGCATGCGCNNS; match class: 1	TF:M10018_1	0.00005229624639632076	4.281529481837642	854	438	42	19917	HASPIN,DSN1,GTSE1,CCDC86,SMC4,SKA3,DTL,HMMR,PCNA,CENPN,CBFB,KNL1,MLX,PPM1D,SREBF1,C18ORF54,MIS18A,RAD18,KBTBD11,MAD2L1,BPHL,PFN1,ORC6,BLOC1S5,NEIL3,SSH2,CDT1,FBXO5,POLH,NOB1,MCM6,NCAPD3,N4BP1,KIF6,DDX39A,CDC7,JAG1,CKLF,EIF5A,RCC1,INTS7,RAN
TF	Factor: GABP; motif: CACTTCCGGNNN	TF:M01258	0.000054621112279608114	4.262639460329978	2860	438	100	19917	DDIAS,AURKA,MCM8,ASF1B,CDK2,CEP55,KIF14,TPX2,CKS2,GTSE1,KIFC1,PIMREG,MELK,AURKB,KIF4A,FANCD2,MYO1C,UBE2C,NCAPG,MASTL,TRIP13,ESPL1,RIOK1,SNRPB,KIF23,POC1A,TTK,ZDHHC5,NCAPD2,LMNB2,C5ORF34,CDC45,CDC20,ZYX,ETNPPL,SF3B3,NKIRAS2,REXO5,RFWD3,TACC3,CKS1B,POLQ,ARHGEF39,TRAIP,KNTC1,RACGAP1,KNSTRN,DAXX,RAD18,DEK,EDEM2,HAUS8,RTKN2,DLGAP5,BFAR,ABT1,SIDT1,CD93,MAD2L1,UFD1,PMM2,PFN1,EME1,ZSCAN16,USB1,SERPINH1,O…
TF	Factor: Egr-1; motif: ACCGCCC; match class: 1	TF:M04918_1	0.00005558317274668396	4.255056666859647	1301	438	56	19917	ZNF367,CENPA,WEE1,SHCBP1,NCAPH,CDCA8,KIF4A,FANCC,RASL10A,CHEK1,IQGAP3,MYO1C,CENPF,HMGA1,RAD51,CKAP2L,CENPM,LMNB1,RRM2,CBFB,SGO2,KPNA2,IKBIP,HPSE2,ARHGEF39,CDCA4,TCF19,C18ORF54,KNTC1,DIAPH1,CNIH4,HAUS8,KBTBD11,HSPG2,SLC1A4,TMEM47,USB1,CFAP20,CDC25A,BLOC1S5,PLSCR3,TPM4,FANCB,NFIL3,E2F1,BZW2,NCAPG2,FAM72D,NEMP1,NIBAN2,MSH6,ADCYAP1R1,PRPF4,CARHSP1,JAG1,WDR53
TF	Factor: meis1:Elf-1; motif: NTGCCGGAAGTN	TF:M08377	0.00006121143696639945	4.21316742512011	11363	438	298	19917	ZNF367,DDIAS,AURKA,NRM,HASPIN,MCM8,ASF1B,NUF2,PTTG1,CENPA,WEE1,PKN3,CDCA8,CEP55,FOXM1,KIF14,CCNB2,POLA2,TPX2,DSN1,SGO1,CKS2,GTSE1,KIFC1,TGFB1I1,PIMREG,NUSAP1,KIF2C,BIRC5,CHEK2,HJURP,MELK,ORC1,AURKB,FANCD2,CCDC86,NDC80,FANCC,ARHGAP11A,TOP2A,CHAF1A,ERCC6L,CHEK1,PCOLCE,TROAP,CDC25C,CCNB1,CCNA2,GAS1,OIP5,FKBP7,PLK1,CEP152,SPC24,ZWINT,DEPDC1B,UBE2C,SKA3,DTL,BUB1,NCAPG,MASTL,MLC1,TRIP13,ESPL1,HMMR,MGME…
TF	Factor: E2F-1; motif: TWSGCGCGAAAAYKR; match class: 1	TF:M00024_1	0.0000634169851129566	4.197794408476223	2721	438	96	19917	ZNF367,AURKA,MCM8,ASF1B,CENPA,FOXM1,POLA2,CKS2,KIFC1,MELK,FANCC,CHEK1,FKBP7,SPC24,SMC4,SKA3,DTL,MYBL2,ESPL1,MGME1,RIOK1,SNRPB,EXO1,ZPR1,RRM2,E2F2,PRIM2,CENPH,SLC26A2,TK1,IGIP,TIMELESS,CAV1,SF3B3,DSCC1,CKS1B,PPM1D,MCM2,MCM3,MCM5,C18ORF54,KNTC1,A2ML1,NSMCE2,HAUS8,RTKN2,UBALD2,SIDT1,CCDC15,MAD2L1,PFN1,LOXL2,ITPRIPL1,BRCA1,E2F7,ZSCAN16,DYNLRB2,DNMT1,TRMT6,CCNF,CDT1,PPP1R18,E2F1,GPN1,GLE1,TEAD4,FAM72D…
TF	Factor: ETS1; motif: ACCGGAARYN; match class: 1	TF:M03977_1	0.00006390616948960733	4.194457213109906	4710	438	147	19917	ZNF367,AURKA,MCM8,ASF1B,TP53I3,WEE1,KIF14,POLA2,TPX2,DSN1,CKS2,GTSE1,KIFC1,TGFB1I1,HJURP,ORC1,ARHGAP11A,ERCC6L,CHEK1,CCNB1,MCM10,MYO1C,PLK1,DEPDC1B,CDCA5,MASTL,TRIP13,CENPF,RIOK1,CEP135,SNRPB,KIF18A,RAD51,EXO1,ZDHHC5,NCAPD2,LMNB1,ECT2,PARPBP,E2F2,CBFB,CDC20,FANCI,SLC26A2,CDC6,ZYX,POLR1H,MLX,SF3B3,WDR62,NKIRAS2,DSCC1,BORA,RPIA,REXO5,RFWD3,TACC3,CKS1B,POLQ,NR2C2AP,MCM3,EIF4A1,MCM5,RFC2,TRAIP,C18ORF…
TF	Factor: ER71; motif: ACCGGAARYN	TF:M02067	0.00007213810446890925	4.141835273571696	6001	438	178	19917	DDIAS,AURKA,NRM,MCM8,ASF1B,WEE1,PKN3,CDK2,CEP55,KIF14,TPX2,CKS2,GTSE1,KIFC1,TGFB1I1,PIMREG,ORC1,AURKB,KIF4A,FANCD2,CENPK,ARHGAP11A,CHAF1A,ERCC6L,CDC25C,CDCA3,MYO1C,FKBP7,SKA1,PLK1,DEPDC1B,SMC4,UBE2C,NCAPG,CDCA5,MASTL,TRIP13,RIOK1,CEP135,SNRPB,KIF23,KIF18A,POC1A,RAD51,ZDHHC5,NCAPD2,LMNB1,KIF20B,PARPBP,LMNB2,PRIM2,C5ORF34,CDC45,FANCI,SLC26A2,ETNPPL,POLR1H,MLX,SF3B3,NKIRAS2,DSCC1,RPIA,REXO5,RFWD3,TA…
TF	Factor: DP-1; motif: NRNNGGCGGGAANN; match class: 1	TF:M10098_1	0.00007764835768282054	4.10986772547092	2184	438	81	19917	ZNF367,MCM8,ASF1B,TP53I3,CEP55,CHST1,CHEK2,FANCC,RASL10A,CHAF1A,GAS1,MASTL,MKI67,PIM1,SNRPB,RAD51AP1,ATAD2,LMNB1,C5ORF34,FANCI,KLF10,WDR62,BORA,TACC3,CKS1B,HMGB2,HPSE2,PPM1D,MND1,CDCA4,TCF19,MCM3,NR3C2,DIAPH1,DEK,HAUS8,IQGAP2,KBTBD11,BFAR,CCDC15,PFN1,TMEM47,CNOT1,E2F7,ORAI1,DDX19B,PLSCR3,FANCB,TRMT6,CLSPN,FBXO5,TEAD4,FAM72D,EZH2,RAD54L,KMT5A,POLH,SDC1,SPINDOC,HAUS1,NEMP1,MKX,XRCC2,NIBAN2,ITGB1,MS…
TF	Factor: IRX2a; motif: ACRYGNNNNACRYGT	TF:M11022	0.00008166445172302526	4.087966949345083	9572	438	259	19917	ZNF367,HASPIN,MCM8,CENPA,WEE1,PKN3,SHCBP1,CDCA8,CEP55,FOXM1,CCNB2,TPX2,CHST1,DSN1,KIFC1,PRC1,KIF2C,CHEK2,HJURP,MELK,ORC1,FANCD2,CCDC86,CENPK,NDC80,FANCC,RASL10A,CHAF1A,IQGAP3,CCNB1,NTSR2,MYO1C,FKBP7,DEPDC1B,SMC4,UBE2C,SKA3,CDCA2,CDCA5,MYBL2,MKI67,TRIP13,ESCO2,HMMR,MGME1,PIM1,CEP135,HMGA1,SNRPB,RAD51AP1,KIF23,POC1A,RAD51,CKAP2L,TTK,PBK,EXO1,ZDHHC5,CENPM,NCAPD2,ZPR1,LMNB1,PCNA,ECT2,KIF20B,CENPN,PAR…
TF	Factor: PEA3; motif: RCCGGAAGYN	TF:M02066	0.00008187029578763855	4.0868736405533115	7124	438	204	19917	DDIAS,AURKA,NRM,HASPIN,MCM8,ASF1B,NUF2,CENPA,WEE1,PKN3,SHCBP1,CDK2,CEP55,KIF14,CCNB2,TPX2,SGO1,CKS2,GTSE1,KIFC1,TGFB1I1,PIMREG,HJURP,MELK,ORC1,AURKB,KIF4A,FANCD2,FANCC,ARHGAP11A,CHAF1A,ERCC6L,CDCA3,CCNB1,MYO1C,FKBP7,SKA1,PLK1,DEPDC1B,SMC4,UBE2C,NCAPG,CDCA2,CDCA5,MASTL,TRIP13,ESPL1,HMMR,MGME1,RIOK1,CEP135,SNRPB,KIF23,POC1A,RAD51,ATAD2,ZDHHC5,NCAPD2,ZPR1,KIF20B,PARPBP,E2F2,LMNB2,PRIM2,C5ORF34,CDC45…
TF	Factor: FLI-1; motif: NAYTTCCGGT	TF:M08913	0.00008366910092801099	4.077434897729975	8401	438	233	19917	DDIAS,AURKA,NRM,HASPIN,MCM8,ASF1B,NUF2,TP53I3,CENPA,WEE1,PKN3,SHCBP1,CDK2,CEP55,KIF14,CCNB2,POLA2,TPX2,SGO1,CKS2,GTSE1,KIFC1,TGFB1I1,PRC1,PIMREG,HJURP,KIF11,MELK,ORC1,AURKB,KIF4A,FANCD2,CENPK,FANCC,ARHGAP11A,CHAF1A,ERCC6L,CDCA3,CCNB1,MCM10,MYO1C,SKA1,PLK1,DEPDC1B,SMC4,UBE2C,NCAPG,CDCA2,CDCA5,MASTL,TRIP13,ESPL1,HMMR,MGME1,RIOK1,CEP135,SNRPB,KIF23,KIF18A,POC1A,RAD51,ATAD2,TTK,ZDHHC5,NCAPD2,ZPR1,LMN…
TF	Factor: ESE-1; motif: NSMGGAARTN; match class: 1	TF:M02055_1	0.00008992304192914733	4.0461290101524865	2194	438	81	19917	HASPIN,NUF2,WEE1,FOXM1,SGO1,CKS2,KIFC1,FANCD2,FANCC,ARHGAP11A,TROAP,CDCA3,DEPDC1B,SMC4,MASTL,TRIP13,RIOK1,SNRPB,KIF23,ZDHHC5,NCAPD2,ZPR1,PARPBP,LMNB2,FANCI,CENPL,FRMD8,SLC26A2,DAP3,RPIA,REXO5,CKS1B,FBLIM1,EIF4A1,MCM5,TRAIP,RACGAP1,KNSTRN,A2ML1,DAXX,DIAPH1,RAD18,NIP7,EDEM2,KBTBD11,BFAR,SIDT1,CD93,MAD2L1,PMM2,PFN1,EME1,BRCA1,USB1,KDM4D,SSH2,DNMT1,PAK1IP1,BRCA2,GPN1,MTFR2,DPP9,C11ORF24,SMARCE1,TBC1D…
TF	Factor: ESE-1; motif: NSMGGAARTN; match class: 1	TF:M01214_1	0.00008992304192914733	4.0461290101524865	2194	438	81	19917	HASPIN,NUF2,WEE1,FOXM1,SGO1,CKS2,KIFC1,FANCD2,FANCC,ARHGAP11A,TROAP,CDCA3,DEPDC1B,SMC4,MASTL,TRIP13,RIOK1,SNRPB,KIF23,ZDHHC5,NCAPD2,ZPR1,PARPBP,LMNB2,FANCI,CENPL,FRMD8,SLC26A2,DAP3,RPIA,REXO5,CKS1B,FBLIM1,EIF4A1,MCM5,TRAIP,RACGAP1,KNSTRN,A2ML1,DAXX,DIAPH1,RAD18,NIP7,EDEM2,KBTBD11,BFAR,SIDT1,CD93,MAD2L1,PMM2,PFN1,EME1,BRCA1,USB1,KDM4D,SSH2,DNMT1,PAK1IP1,BRCA2,GPN1,MTFR2,DPP9,C11ORF24,SMARCE1,TBC1D…
TF	Factor: NRF-1; motif: CNSTGCGCATGCGCNNS	TF:M10018	0.00009005200551623902	4.045506610718549	1838	438	71	19917	AURKA,HASPIN,NCAPH,POLA2,DSN1,CKS2,GTSE1,CCDC86,CCNB1,SKA1,SPC24,ZWINT,SMC4,SKA3,DTL,HMMR,CENPF,PCNA,CENPN,CBFB,KNL1,TIMELESS,MLX,CKS1B,PPM1D,SREBF1,MCM2,TCF19,C18ORF54,MIS18A,WDR12,RAD18,MXD3,WDHD1,NSMCE2,EDEM2,HAUS8,RTKN2,KBTBD11,MAD2L1,BPHL,PFN1,ORC6,CKAP2,BLOC1S5,NEIL3,DYNLRB2,SSH2,DNMT1,CCNF,CDT1,FBXO5,GLE1,POLH,NOB1,MCM6,NCAPD3,N4BP1,XRCC2,KIF6,DDX39A,CDC7,SIKE1,JAG1,H2BC15,PRIM1,CKLF,EIF5A…
TF	Factor: Elk-1; motif: NRSCGGAAGNN	TF:M11434	0.00010333179805090699	3.9857660134948016	8290	438	230	19917	DDIAS,AURKA,NRM,HASPIN,MCM8,ASF1B,NUF2,PTTG1,CENPA,PKN3,SHCBP1,CDK2,CDCA8,CEP55,KIF14,CCNB2,TPX2,CHST1,SGO1,CKS2,GTSE1,KIFC1,TGFB1I1,PIMREG,NUSAP1,KIF2C,CHEK2,HJURP,MELK,ORC1,AURKB,KIF4A,FANCD2,FANCC,ARHGAP11A,TOP2A,ERCC6L,CDC25C,CDCA3,CCNB1,CCNA2,OIP5,MYO1C,FKBP7,SKA1,PLK1,CEP152,ZWINT,UBE2C,BUB1,NCAPG,CDCA2,CDCA5,MASTL,TRIP13,ESPL1,MGME1,RIOK1,HMGA1,SNRPB,KIF23,POC1A,RAD51,ATAD2,ZDHHC5,NCAPD2,Z…
TF	Factor: NRF-1; motif: YGCGCATGCGCN; match class: 1	TF:M04059_1	0.00010476892970921846	3.979767492700385	1038	438	47	19917	HASPIN,POLA2,DSN1,GTSE1,CCDC86,SMC4,SKA3,DTL,NCAPG,HMMR,KIF23,PCNA,CENPN,CBFB,KNL1,MLX,CKS1B,PPM1D,SREBF1,NR2C2AP,C18ORF54,MIS18A,RAD18,KBTBD11,BFAR,BPHL,ORC6,BLOC1S5,NEIL3,SSH2,DNMT1,CDT1,FBXO5,POLH,NOB1,MCM6,NCAPD3,N4BP1,KIF6,DDX39A,CDC7,JAG1,CKLF,EIF5A,RCC1,INTS7,RAN
TF	Factor: ELF1; motif: NCCGGAARTN	TF:M02053	0.00010855627725840094	3.9643450584383686	6085	438	179	19917	DDIAS,AURKA,MCM8,WEE1,PKN3,SHCBP1,CEP55,KIF14,TPX2,CHST1,SGO1,GTSE1,KIFC1,PIMREG,HJURP,KIF11,ORC1,KIF4A,FANCD2,ARHGAP11A,CHAF1A,ERCC6L,CDCA3,MCM10,MYO1C,DEPDC1B,SMC4,UBE2C,NCAPG,CDCA5,MASTL,MYBL2,TRIP13,HMMR,CENPF,RIOK1,CEP135,SNRPB,KIF23,KIF18A,POC1A,ATAD2,ZDHHC5,NCAPD2,ZPR1,LMNB1,ECT2,PARPBP,LMNB2,PRIM2,C5ORF34,CDC45,CBFB,FANCI,CENPH,CENPL,CDC6,ETNPPL,DAP3,POLR1H,MLX,SF3B3,WDR62,NKIRAS2,DSCC1,B…
TF	Factor: E2F-1; motif: TWSGCGCGAAAAYKR	TF:M00024	0.00010855627725840094	3.9643450584383686	9014	438	246	19917	ZNF367,AURKA,NRM,MCM8,ASF1B,NUF2,PTTG1,CENPA,WEE1,CDK1,NCAPH,FOXM1,POLA2,TPX2,SGO1,CKS2,KIFC1,KIF2C,KIF11,MELK,ORC1,KIF4A,SFRP2,FANCD2,CENPK,NDC80,FANCC,ARHGAP11A,TOP2A,CHAF1A,CHEK1,CDCA3,CCNB1,MCM10,FKBP7,SKA1,WDR76,PLK1,SPC24,ZWINT,SMC4,SKA3,DTL,NCAPG,CDCA5,MYBL2,TRIP13,ESCO2,ESPL1,HMMR,MGME1,CENPF,PIM1,RIOK1,CEP135,SNRPB,POC1A,ATAD2,TTK,EXO1,BRIP1,CENPM,ZPR1,LMNB1,PCNA,RRM2,ALDOC,CENPN,E2F2,PR…
TF	Factor: Elk-1; motif: NNCCGGAAGTN; match class: 1	TF:M11435_1	0.00010855627725840094	3.9643450584383686	5791	438	172	19917	DDIAS,AURKA,HASPIN,MCM8,ASF1B,NUF2,WEE1,CDCA8,KIF14,CCNB2,SGO1,CKS2,KIFC1,TGFB1I1,HJURP,MELK,ORC1,FANCD2,CCDC86,FANCC,ARHGAP11A,CDC25C,MYO1C,SKA1,PLK1,DEPDC1B,DTL,BUB1,CDCA5,MASTL,TRIP13,MGME1,RIOK1,CEP135,SNRPB,KIF23,RAD51,ATAD2,ZDHHC5,NCAPD2,ZPR1,RRM2,KIF20B,PARPBP,PRIM2,CBFB,CDC20,KNL1,FANCI,CENPH,SLC26A2,SGO2,ZYX,MLX,SF3B3,WDR62,ZWILCH,NKIRAS2,DSCC1,BORA,RPIA,REXO5,TACC3,CKS1B,POLQ,ARHGEF39,M…
TF	Factor: NF-Y; motif: NNNNRRCCAATSR	TF:M00775	0.00011348095328619551	3.9450770246104514	1471	438	60	19917	DDIAS,AURKA,MCM8,ASF1B,CDK1,NCAPH,CEP55,KIF14,KIF20A,CKS2,TGFB1I1,PIMREG,CHEK2,MELK,ARHGAP11A,TOP2A,PLK1,UBE2C,BUB1,CDCA2,CDCA5,KIF23,POC1A,CKAP2L,ATAD2,ZDHHC5,NCAPD2,ECT2,TK1,CDC6,SGO2,IGIP,KLF10,TACC3,NEK2,CKS1B,CDCA4,MCM3,MCM5,CDKN3,MLXIP,RACGAP1,DAXX,UBALD2,SLC1A4,CNOT1,ORC6,CKAP2,E2F3,TRMT6,FAAP24,UBE2T,GABRG1,NCAPD3,RARS2,MSH6,PRR11,INCENP,STIP1,NUP93
TF	Factor: E2F-1:HES-7; motif: GGCRCGTGSYNNWNGGCGCSM	TF:M08525	0.00011382606920982105	3.943758261514002	17224	438	409	19917	ZNF367,DDIAS,AURKA,NRM,HASPIN,MCM8,ASF1B,PTTG1,TP53I3,CENPA,WEE1,PKN3,SHCBP1,CDK2,CDK1,NCAPH,CDCA8,CEP55,FOXM1,KIF14,CCNB2,POLA2,TPX2,CHST1,DSN1,SGO1,CKS2,GTSE1,KIFC1,TGFB1I1,PRC1,PIMREG,NUSAP1,KIF2C,BIRC5,CHEK2,HJURP,KIF11,MELK,ORC1,AURKB,ASPM,KIF4A,SFRP2,FANCD2,CCDC86,CENPK,NDC80,FANCC,RASL10A,ARHGAP11A,TOP2A,CHAF1A,ERCC6L,CHEK1,PCOLCE,CDC25C,CDCA3,CCNB1,MCM10,CCNA2,GAS1,OIP5,NTSR2,MYO1C,WDR76,…
TF	Factor: Pax-3; motif: NNNNNNCGTCACGSTYNNNNN	TF:M00327	0.00011946912142875382	3.922744330079942	13445	438	339	19917	ZNF367,DDIAS,AURKA,HASPIN,MCM8,ASF1B,NUF2,PTTG1,CENPA,PKN3,CDK2,NCAPH,CDCA8,CEP55,FOXM1,KIF14,CCNB2,POLA2,KIF20A,TPX2,DSN1,SGO1,CKS2,KIFC1,TGFB1I1,PRC1,PIMREG,NUSAP1,BIRC5,HJURP,KIF11,MELK,ORC1,AURKB,ASPM,KIF4A,SFRP2,FANCD2,CCDC86,CENPK,NDC80,RASL10A,TOP2A,CHAF1A,ERCC6L,CHEK1,CDC25C,CCNB1,CCNA2,GAS1,OIP5,NTSR2,PLK1,CEP152,DEPDC1B,SMC4,UBE2C,DTL,BUB1,NCAPG,CDCA2,CDCA5,MASTL,MYBL2,MLC1,MKI67,ESCO2,…
TF	Factor: ER81; motif: NNCCGGAWGYN	TF:M11419	0.0001200950365249538	3.9204749414261384	5760	438	171	19917	DDIAS,AURKA,NRM,MCM8,ASF1B,PKN3,CDK2,CEP55,KIF14,TPX2,SGO1,CKS2,GTSE1,KIFC1,TGFB1I1,PIMREG,HJURP,MELK,ORC1,AURKB,ASPM,KIF4A,FANCD2,ARHGAP11A,ERCC6L,CHEK1,CDCA3,CCNB1,GAS1,MYO1C,FKBP7,SKA1,PLK1,UBE2C,NCAPG,CDCA2,CDCA5,MASTL,MLC1,MKI67,TRIP13,ESPL1,RIOK1,CEP135,SNRPB,KIF23,POC1A,RAD51,ZDHHC5,NCAPD2,ECT2,KIF20B,PARPBP,LMNB2,PRIM2,C5ORF34,CDC45,CDC20,FANCI,SLC26A2,CDC6,ZYX,ETNPPL,SF3B3,IKBIP,WDR62,NK…
TF	Factor: E2F-1; motif: NKTSSCGC; match class: 1	TF:M00428_1	0.00012181214052002924	3.9143094251834385	3652	438	119	19917	ZNF367,AURKA,ASF1B,CDK1,FOXM1,TPX2,KIFC1,PRC1,HJURP,MELK,ORC1,CCDC86,CENPK,NDC80,FANCC,RASL10A,CHAF1A,CHEK1,CDC25C,NTSR2,SPC24,ZWINT,DTL,MGME1,PIM1,KIF18A,ATAD2,PBK,EXO1,ZDHHC5,LMNB1,PCNA,RRM2,CENPN,E2F2,CBFB,CENPL,TIMELESS,KPNA2,SF3B3,IKBIP,ALDH2,WDR62,BORA,TACC3,NEK2,HMGB2,SREBF1,MCM2,MND1,CDCA4,NR2C2AP,MCM5,RFC2,KNSTRN,NR3C2,PCLAF,COL4A1,EGLN3,NSMCE2,TRIM26,NIP7,UBALD2,ABT1,HSPG2,MAD2L1,SLC1A4…
TF	Factor: YB-1; motif: CCAMTCNGMR	TF:M03805	0.00012220046453517429	3.912927143155008	10267	438	273	19917	ZNF367,DDIAS,AURKA,ASF1B,PTTG1,TP53I3,CENPA,PKN3,SHCBP1,CDK1,NCAPH,CDCA8,CEP55,FOXM1,KIF14,CCNB2,POLA2,KIF20A,TPX2,CHST1,SGO1,CKS2,GTSE1,KIFC1,TGFB1I1,PIMREG,NUSAP1,BIRC5,CHEK2,HJURP,MELK,ORC1,AURKB,ASPM,CENPK,NDC80,FANCC,RASL10A,ARHGAP11A,TOP2A,CHAF1A,ERCC6L,IQGAP3,TROAP,CDC25C,CDCA3,CCNB1,MCM10,GAS1,OIP5,MYO1C,SKA1,WDR76,PLK1,CEP152,SPC24,ZWINT,DEPDC1B,SMC4,UBE2C,DTL,BUB1,NCAPG,CDCA2,MASTL,MLC1…
TF	Factor: PEA3; motif: NACCGGAAGTN	TF:M11427	0.00012393850257638378	3.9067937552957654	10689	438	282	19917	ZNF367,DDIAS,AURKA,NRM,HASPIN,MCM8,ASF1B,NUF2,CENPA,WEE1,PKN3,SHCBP1,CDK2,NCAPH,CEP55,KIF14,CCNB2,TPX2,CHST1,SGO1,CKS2,GTSE1,KIFC1,TGFB1I1,PIMREG,HJURP,KIF11,MELK,ORC1,AURKB,ASPM,KIF4A,FANCD2,NDC80,FANCC,RASL10A,ARHGAP11A,CHAF1A,ERCC6L,CHEK1,CDC25C,CDCA3,CCNB1,CCNA2,GAS1,MYO1C,FKBP7,SKA1,PLK1,CEP152,DEPDC1B,SMC4,UBE2C,DTL,NCAPG,CDCA2,CDCA5,MASTL,MLC1,MKI67,TRIP13,ESPL1,HMMR,MGME1,RIOK1,CEP135,SNR…
TF	Factor: ATF; motif: NTGACGTCANYS	TF:M00338	0.0001307093135266359	3.883693466213506	3855	438	124	19917	ZNF367,DDIAS,AURKA,NUF2,CENPA,SHCBP1,CDK2,CDK1,NCAPH,KIF20A,DSN1,SGO1,CKS2,PRC1,KIF2C,AURKB,ASPM,FANCD2,CCDC86,CENPK,NDC80,FANCC,CHAF1A,PCOLCE,MCM10,CCNA2,SPC24,DTL,CDCA2,MASTL,TRIP13,MGME1,PIM1,RIOK1,SNRPB,TTK,PBK,EXO1,NCAPD2,CENPN,C5ORF34,CENPH,SGO2,DAP3,POLR1H,CCND1,CENPE,IKBIP,WDR62,ZWILCH,PPM1D,SREBF1,MCM2,CENPW,MCM3,EIF4A1,RFC2,DEPDC1,MLXIP,RACGAP1,RNASEH2A,LRR1,DAAM2,ADGRL4,DIAPH1,RAD18,MX…
TF	Factor: ERG; motif: ACCGGAARTN	TF:M03975	0.0001415095380825039	3.849214286662698	10098	438	269	19917	DDIAS,AURKA,NRM,MCM8,ASF1B,NUF2,TP53I3,CENPA,WEE1,PKN3,SHCBP1,CDK2,CEP55,KIF14,POLA2,TPX2,CKS2,GTSE1,KIFC1,TGFB1I1,PRC1,PIMREG,CHEK2,HJURP,KIF11,MELK,ORC1,AURKB,KIF4A,FANCD2,CENPK,ARHGAP11A,CHAF1A,ERCC6L,CHEK1,IQGAP3,CDC25C,CDCA3,CCNB1,MCM10,CCNA2,MYO1C,FKBP7,SKA1,PLK1,DEPDC1B,SMC4,UBE2C,BUB1,NCAPG,CDCA2,CDCA5,MASTL,MLC1,TRIP13,ESPL1,HMMR,MGME1,RIOK1,CEP135,SNRPB,KIF23,KIF18A,POC1A,RAD51,ATAD2,TT…
TF	Factor: E2F-1; motif: TTTGGCGCCAAA	TF:M04516	0.00015075623153358329	3.821724727183067	11467	438	298	19917	ZNF367,DDIAS,AURKA,MCM8,TP53I3,CENPA,WEE1,PKN3,SHCBP1,CDK1,NCAPH,CDCA8,CEP55,FOXM1,KIF14,CCNB2,POLA2,CHST1,DSN1,CKS2,GTSE1,KIFC1,TGFB1I1,PRC1,NUSAP1,KIF2C,CHEK2,HJURP,KIF11,MELK,ORC1,ASPM,CCDC86,CENPK,NDC80,FANCC,RASL10A,TOP2A,CHAF1A,ERCC6L,CHEK1,IQGAP3,MCM10,CCNA2,GAS1,OIP5,NTSR2,MYO1C,WDR76,CEP152,SPC24,ZWINT,DEPDC1B,SMC4,SKA3,DTL,BUB1,CDCA5,MASTL,MYBL2,MKI67,TRIP13,ESPL1,HMMR,MGME1,PIM1,RIOK1,…
TF	Factor: Fli-1; motif: NACCGGATATCCGGTN; match class: 1	TF:M11401_1	0.00015840843555985502	3.800221695097849	11904	438	307	19917	DDIAS,NRM,HASPIN,MCM8,ASF1B,NUF2,TP53I3,CENPA,WEE1,PKN3,FOXM1,KIF14,POLA2,KIF20A,TPX2,CHST1,CKS2,GTSE1,KIFC1,TGFB1I1,PIMREG,NUSAP1,KIF2C,BIRC5,HJURP,MELK,ORC1,ASPM,KIF4A,SFRP2,CENPK,NDC80,RASL10A,TOP2A,CHAF1A,CHEK1,PCOLCE,TROAP,CDCA3,CCNB1,CCNA2,GAS1,OIP5,MYO1C,WDR76,PLK1,CEP152,DEPDC1B,SMC4,SKA3,DTL,NCAPG,CDCA5,MASTL,MYBL2,MLC1,TRIP13,HMMR,MGME1,PIM1,RIOK1,CEP135,HMGA1,SNRPB,KIF23,KIF18A,RAD51,C…
TF	Factor: NRF-1; motif: YGCGCMTGCGC; match class: 1	TF:M02102_1	0.00016392177041071532	3.785363364053834	657	438	34	19917	HASPIN,DSN1,GTSE1,CCDC86,ZWINT,SMC4,DTL,HMMR,CENPN,CBFB,MLX,CKS1B,SREBF1,TCF19,C18ORF54,MIS18A,RAD18,KBTBD11,MAD2L1,BPHL,PFN1,ORC6,NEIL3,CDT1,NOB1,NCAPD3,N4BP1,KIF6,CDC7,JAG1,CKLF,EIF5A,INTS7,RAN
TF	Factor: Fli-1; motif: NACCGGATATCCGGTN	TF:M11401	0.00016826659409971675	3.774002095778153	12056	438	310	19917	DDIAS,NRM,HASPIN,MCM8,ASF1B,NUF2,TP53I3,CENPA,WEE1,PKN3,SHCBP1,FOXM1,KIF14,POLA2,KIF20A,TPX2,CHST1,CKS2,GTSE1,KIFC1,TGFB1I1,PIMREG,NUSAP1,KIF2C,BIRC5,HJURP,MELK,ORC1,ASPM,KIF4A,SFRP2,CENPK,NDC80,RASL10A,TOP2A,CHAF1A,CHEK1,PCOLCE,TROAP,CDCA3,CCNB1,CCNA2,GAS1,OIP5,MYO1C,SKA1,WDR76,PLK1,CEP152,DEPDC1B,SMC4,SKA3,DTL,NCAPG,CDCA5,MASTL,MYBL2,MLC1,MKI67,TRIP13,HMMR,MGME1,PIM1,RIOK1,CEP135,HMGA1,SNRPB,KI…
TF	Factor: TFDP1; motif: NSGCGGGAANN	TF:M09789	0.0001725783607728794	3.7630136604521605	2057	438	76	19917	HASPIN,ASF1B,TP53I3,CENPA,WEE1,PKN3,SHCBP1,NCAPH,CEP55,CHST1,CHEK2,SFRP2,FANCC,RASL10A,CHAF1A,SKA1,WDR76,CEP152,PIM1,SNRPB,ATAD2,NCAPD2,LMNB1,PCNA,CENPN,CBFB,ZYX,IKBIP,KLF10,BORA,HMGB2,HPSE2,CDCA4,TCF19,LRR1,DAXX,MXD3,HAUS8,BFAR,CCDC15,PFN1,BRCA1,DDX19B,PLSCR3,CDT1,PPP1R18,CLSPN,GLE1,TEAD4,NCAPG2,FAM72D,UCK2,EZH2,SDC1,TBC1D31,AFAP1L1,SPINDOC,MCM4,HAUS1,FANCA,NEMP1,FOXD2,TXNDC5,ELOVL2,MSH6,SVEP1,C…
TF	Factor: Churchill; motif: CGGGNN	TF:M00986	0.00018185667920290165	3.7402707436183755	14305	438	355	19917	ZNF367,DDIAS,AURKA,NRM,HASPIN,ASF1B,TP53I3,CENPA,WEE1,PKN3,CDK2,CDK1,NCAPH,CDCA8,CEP55,FOXM1,KIF14,POLA2,KIF20A,CHST1,DSN1,SGO1,CKS2,GTSE1,KIFC1,TGFB1I1,PRC1,PIMREG,NUSAP1,KIF2C,BIRC5,CHEK2,HJURP,KIF11,MELK,ORC1,AURKB,KIF4A,SFRP2,CCDC86,FANCC,RASL10A,ARHGAP11A,TOP2A,CHAF1A,ERCC6L,CHEK1,IQGAP3,PCOLCE,CDC25C,CDCA3,CCNB1,MCM10,GAS1,OIP5,NTSR2,MYO1C,SKA1,WDR76,PLK1,SPC24,ZWINT,DEPDC1B,UBE2C,SKA3,DTL,…
TF	Factor: Pet-1; motif: GCNGGAAGYG; match class: 1	TF:M09918_1	0.000182615219067727	3.7384630313925897	7213	438	204	19917	ZNF367,NRM,MCM8,ASF1B,PTTG1,CENPA,WEE1,PKN3,SHCBP1,NCAPH,CEP55,CHST1,CKS2,KIFC1,TGFB1I1,PIMREG,KIF2C,CHEK2,HJURP,MELK,AURKB,KIF4A,SFRP2,FANCD2,CENPK,RASL10A,CHAF1A,IQGAP3,TROAP,CDC25C,CDCA3,GAS1,MYO1C,SPC24,DEPDC1B,SMC4,BUB1,NCAPG,CDCA2,CDCA5,MASTL,TRIP13,ESPL1,CEP135,HMGA1,SNRPB,KIF23,KIF18A,POC1A,RAD51,TTK,ZDHHC5,NCAPD2,CENPN,PARPBP,C5ORF34,CBFB,KNL1,FANCI,CENPH,CENPL,FRMD8,TK1,CDC6,SGO2,CAV1,Z…
TF	Factor: Elf-1; motif: NANCCGGAAGTN	TF:M11451	0.00018724794380352498	3.727582942652185	6956	438	198	19917	DDIAS,AURKA,NRM,HASPIN,MCM8,ASF1B,NUF2,CENPA,WEE1,PKN3,CDK2,CDCA8,CEP55,KIF14,CCNB2,TPX2,CHST1,SGO1,CKS2,GTSE1,KIFC1,TGFB1I1,PIMREG,ORC1,AURKB,KIF4A,FANCD2,FANCC,ARHGAP11A,TOP2A,ERCC6L,CDCA3,MYO1C,FKBP7,SKA1,PLK1,ZWINT,UBE2C,BUB1,NCAPG,CDCA5,MASTL,TRIP13,MGME1,RIOK1,SNRPB,KIF23,POC1A,RAD51,TTK,ZDHHC5,NCAPD2,ZPR1,RRM2,KIF20B,PARPBP,LMNB2,PRIM2,C5ORF34,CDC45,CDC20,FANCI,FRMD8,SLC26A2,ZYX,ETNPPL,DAP…
TF	Factor: E2F-6; motif: NGGGCGGGARRNN; match class: 1	TF:M09895_1	0.00020322460387959127	3.692023714290229	2732	438	94	19917	ZNF367,MCM8,ASF1B,PKN3,CEP55,CHST1,CHEK2,MELK,FANCC,RASL10A,CHAF1A,CHEK1,CDCA3,GAS1,WDR76,MASTL,MYBL2,MKI67,PIM1,SNRPB,RAD51AP1,ATAD2,LMNB1,ALDOC,FANCI,TK1,KLF10,NKIRAS2,BORA,TACC3,HMGB2,HPSE2,PPM1D,MND1,TCF19,MCM3,CDKN3,NR3C2,DIAPH1,MXD3,DEK,HAUS8,IQGAP2,CCDC15,PFN1,SLC1A4,TMEM47,CNOT1,E2F7,ORAI1,E2F3,DDX19B,TRMT6,CDT1,CLSPN,FBXO5,TEAD4,FAM72D,UCK2,DPP9,EZH2,RAD54L,KMT5A,POLH,DBF4,SDC1,TBC1D31,S…
TF	Factor: PEA3; motif: NACCGGAAGTN; match class: 1	TF:M11430_1	0.0002054318405680165	3.6873322427674813	4943	438	150	19917	AURKA,HASPIN,MCM8,ASF1B,KIF14,CHST1,SGO1,CKS2,KIFC1,TGFB1I1,MELK,ORC1,ASPM,FANCD2,ARHGAP11A,CHAF1A,CCNB1,MYO1C,SKA1,PLK1,DEPDC1B,CDCA2,CDCA5,MASTL,TRIP13,MGME1,RIOK1,CEP135,SNRPB,KIF23,RAD51,ZDHHC5,NCAPD2,ZPR1,ECT2,KIF20B,PARPBP,E2F2,PRIM2,CDC20,FANCI,SLC26A2,CDC6,ZYX,VKORC1,DAP3,POLR1H,MLX,SF3B3,IKBIP,WDR62,ZWILCH,NKIRAS2,DSCC1,RPIA,REXO5,RFWD3,CKS1B,MCM2,MND1,MCM3,EIF4A1,MCM5,RFC2,TRAIP,KNSTRN,…
TF	Factor: MECP2; motif: CCGGNNTTWA	TF:M01299	0.0002096615856529622	3.678481133994358	5275	438	158	19917	ZNF367,DDIAS,HASPIN,NUF2,CENPA,SHCBP1,FOXM1,TPX2,CKS2,GTSE1,PRC1,PIMREG,NUSAP1,HJURP,ORC1,ASPM,FANCD2,CENPK,FANCC,TOP2A,CHAF1A,CHEK1,TROAP,CDCA3,GAS1,OIP5,NTSR2,PLK1,SMC4,MKI67,ESCO2,ESPL1,HMMR,CENPF,RIOK1,CEP135,HMGA1,SNRPB,RAD51AP1,POC1A,RAD51,ZDHHC5,CENPM,ZPR1,ECT2,RRM2,KIF20B,PARPBP,CDC20,KNL1,FANCI,CENPL,SLC26A2,CDC6,SGO2,TIMELESS,ZYX,ETNPPL,VKORC1,POLR1H,CCND1,IKBIP,DSCC1,BORA,TACC3,MCM2,AR…
TF	Factor: E2F-1; motif: NTTTTGGCGCCAWWWN; match class: 1	TF:M11533_1	0.00021098174248018574	3.675755125191297	8777	438	239	19917	ZNF367,AURKA,TP53I3,WEE1,PKN3,SHCBP1,CDK1,CDCA8,CEP55,FOXM1,KIF14,CCNB2,POLA2,KIF20A,TPX2,CHST1,DSN1,CKS2,GTSE1,TGFB1I1,PRC1,NUSAP1,CHEK2,HJURP,KIF11,ORC1,ASPM,CENPK,NDC80,FANCC,RASL10A,TOP2A,CHAF1A,CHEK1,IQGAP3,PCOLCE,MCM10,CCNA2,OIP5,MYO1C,CEP152,SPC24,ZWINT,DEPDC1B,SMC4,SKA3,DTL,BUB1,NCAPG,CDCA5,MASTL,MYBL2,MKI67,ESPL1,HMMR,MGME1,CENPF,PIM1,RIOK1,CEP135,RAD51AP1,KIF23,KIF18A,POC1A,RAD51,CKAP2L…
TF	Factor: BSX; motif: NNCGTTAN	TF:M10591	0.00022926118103672985	3.6396694746584126	7851	438	218	19917	ZNF367,DDIAS,AURKA,HASPIN,MCM8,NUF2,TP53I3,CENPA,WEE1,PKN3,NCAPH,CEP55,FOXM1,KIF14,POLA2,TPX2,DSN1,SGO1,CKS2,PRC1,PIMREG,NUSAP1,KIF2C,KIF11,ORC1,AURKB,ASPM,KIF4A,FANCD2,CCDC86,CENPK,ARHGAP11A,TOP2A,CHAF1A,ERCC6L,PCOLCE,CDC25C,CDCA3,CCNB1,MCM10,GAS1,OIP5,NTSR2,FKBP7,SKA1,WDR76,PLK1,CEP152,DEPDC1B,SMC4,UBE2C,SKA3,DTL,BUB1,NCAPG,CDCA2,MLC1,MKI67,ESCO2,ESPL1,HMMR,PIM1,CEP135,HMGA1,SNRPB,KIF23,KIF18A,…
TF	Factor: Fli-1; motif: NACCGGAARTN; match class: 1	TF:M11400_1	0.00024918391848939466	3.6034799890460842	4230	438	132	19917	DDIAS,AURKA,MCM8,ASF1B,TP53I3,WEE1,KIF14,POLA2,CKS2,GTSE1,KIFC1,TGFB1I1,HJURP,ORC1,ARHGAP11A,ERCC6L,CHEK1,MCM10,MYO1C,PLK1,DEPDC1B,SMC4,CDCA5,MASTL,TRIP13,RIOK1,CEP135,SNRPB,KIF18A,RAD51,ZDHHC5,NCAPD2,LMNB1,ECT2,PARPBP,E2F2,CBFB,CDC20,FANCI,CENPL,SLC26A2,CDC6,ZYX,POLR1H,MLX,SF3B3,WDR62,NKIRAS2,DSCC1,BORA,RPIA,REXO5,RFWD3,TACC3,CKS1B,MCM3,EIF4A1,MCM5,RFC2,TRAIP,C18ORF54,RACGAP1,DAXX,RAD18,DEK,WDHD…
TF	Factor: c-ets-1; motif: ACCGGAWGTN	TF:M02063	0.0002535284371846925	3.5959733206709306	7686	438	214	19917	DDIAS,AURKA,NRM,HASPIN,MCM8,ASF1B,NUF2,WEE1,PKN3,CDK2,CEP55,KIF14,CCNB2,TPX2,CHST1,SGO1,CKS2,GTSE1,KIFC1,TGFB1I1,PIMREG,HJURP,MELK,ORC1,AURKB,KIF4A,FANCD2,NDC80,FANCC,ARHGAP11A,ERCC6L,CHEK1,CDC25C,CDCA3,CCNB1,MYO1C,FKBP7,SKA1,PLK1,DEPDC1B,SMC4,UBE2C,NCAPG,CDCA5,MASTL,MLC1,TRIP13,ESPL1,MGME1,RIOK1,CEP135,SNRPB,KIF23,POC1A,RAD51,ZDHHC5,NCAPD2,ZPR1,ECT2,KIF20B,PARPBP,LMNB2,PRIM2,C5ORF34,CDC45,CDC20,…
TF	Factor: GABPalpha; motif: RCCGGAWRYN	TF:M02074	0.0002705940844745257	3.567681701855737	4642	438	142	19917	DDIAS,AURKA,NRM,TP53I3,WEE1,KIF14,TPX2,CKS2,GTSE1,KIFC1,TGFB1I1,PRC1,ORC1,AURKB,KIF4A,FANCD2,CENPK,ARHGAP11A,CHAF1A,ERCC6L,MCM10,MYO1C,DEPDC1B,SMC4,UBE2C,NCAPG,CDCA5,MASTL,TRIP13,HMMR,RIOK1,CEP135,SNRPB,KIF23,KIF18A,ATAD2,ZDHHC5,NCAPD2,LMNB1,LMNB2,C5ORF34,CDC45,CENPL,ETNPPL,POLR1H,MLX,SF3B3,WDR62,NKIRAS2,DSCC1,RPIA,REXO5,RFWD3,TACC3,CKS1B,POLQ,ARHGEF39,MCM5,TRAIP,RACGAP1,RNASEH2A,KNSTRN,DAXX,RAD1…
TF	Factor: Kaiso; motif: TCTCGCGAG; match class: 1	TF:M04691_1	0.0002782120626385291	3.555624043920612	10595	438	278	19917	DDIAS,NRM,HASPIN,MCM8,ASF1B,NUF2,CENPA,WEE1,SHCBP1,CDK1,NCAPH,CDCA8,FOXM1,CCNB2,POLA2,TPX2,SGO1,KIFC1,PRC1,PIMREG,NUSAP1,KIF2C,BIRC5,CHEK2,HJURP,KIF11,MELK,ORC1,ASPM,SFRP2,CCDC86,CENPK,FANCC,RASL10A,ARHGAP11A,TOP2A,CHAF1A,CDCA3,CCNB1,CCNA2,GAS1,OIP5,NTSR2,MYO1C,FKBP7,SKA1,WDR76,SPC24,DEPDC1B,SMC4,UBE2C,SKA3,DTL,NCAPG,CDCA2,MASTL,MYBL2,MKI67,TRIP13,ESCO2,ESPL1,HMMR,MGME1,CENPF,RIOK1,SNRPB,KIF18A,P…
TF	Factor: E2F-2; motif: NTTTTGGCGCCAWWWN; match class: 1	TF:M11528_1	0.000279844299685346	3.55308353506925	4809	438	146	19917	ZNF367,AURKA,HASPIN,TP53I3,SHCBP1,CDK1,CEP55,FOXM1,POLA2,DSN1,KIFC1,TGFB1I1,PRC1,HJURP,KIF11,ORC1,NDC80,RASL10A,CHAF1A,CHEK1,IQGAP3,MCM10,CCNA2,MYO1C,CEP152,SPC24,ZWINT,SMC4,SKA3,DTL,MASTL,MKI67,ESPL1,MGME1,RAD51AP1,KIF18A,POC1A,CKAP2L,ATAD2,ZDHHC5,CENPM,LMNB1,ECT2,RRM2,CENPN,E2F2,C5ORF34,CBFB,CDC20,KNL1,CENPL,SLC26A2,CDC6,TIMELESS,ZYX,KPNA2,CCND1,SF3B3,IKBIP,KLF10,WDR62,NKIRAS2,GJC1,RFWD3,TACC3,…
TF	Factor: E2F-7; motif: GRGGCGGGAANNN; match class: 1	TF:M09896_1	0.0002838903689859802	3.546849340715398	4566	438	140	19917	ZNF367,MCM8,ASF1B,TP53I3,PKN3,CEP55,CHST1,PIMREG,CHEK2,MELK,SFRP2,FANCC,RASL10A,TOP2A,CHAF1A,CHEK1,PCOLCE,CDCA3,CCNA2,GAS1,MYO1C,WDR76,CDCA5,MASTL,MYBL2,MKI67,PIM1,SNRPB,RAD51AP1,ATAD2,ZDHHC5,CENPM,LMNB1,ALDOC,C5ORF34,CDC45,FANCI,TK1,ZYX,KLF10,WDR62,NKIRAS2,DSCC1,BORA,RPIA,RFWD3,TACC3,CKS1B,HMGB2,HPSE2,PPM1D,MCM2,MND1,TCF19,MCM3,CDKN3,MLXIP,MIS18A,NR3C2,DIAPH1,MXD3,COL4A1,DEK,TRIM26,HAUS8,IQGAP2,…
TF	Factor: Erm; motif: ACCGGAAGTN	TF:M02069	0.000290338185158444	3.537095842180656	6961	438	197	19917	DDIAS,AURKA,NRM,MCM8,ASF1B,CENPA,WEE1,PKN3,CDK2,CEP55,KIF14,TPX2,SGO1,CKS2,GTSE1,KIFC1,TGFB1I1,PIMREG,HJURP,KIF11,MELK,ORC1,AURKB,KIF4A,FANCD2,CENPK,ARHGAP11A,ERCC6L,CHEK1,CDCA3,CCNB1,MYO1C,SKA1,PLK1,DEPDC1B,SMC4,UBE2C,NCAPG,CDCA5,MASTL,MLC1,TRIP13,ESPL1,HMMR,MGME1,RIOK1,CEP135,SNRPB,KIF23,POC1A,RAD51,ATAD2,TTK,ZDHHC5,NCAPD2,ECT2,RRM2,KIF20B,PARPBP,LMNB2,PRIM2,C5ORF34,CDC45,CBFB,CDC20,FANCI,CENPH…
TF	Factor: NRF-1; motif: GCGCMTGCGCN; match class: 1	TF:M07052_1	0.00029654323833500237	3.527911974133684	739	438	36	19917	HASPIN,POLA2,DSN1,GTSE1,CCDC86,SMC4,DTL,HMMR,CENPN,CBFB,MLX,CKS1B,SREBF1,C18ORF54,MIS18A,RAD18,KBTBD11,MAD2L1,BPHL,PFN1,ORC6,NEIL3,SSH2,CDT1,FBXO5,POLH,NOB1,NCAPD3,N4BP1,KIF6,DDX39A,CDC7,JAG1,CKLF,INTS7,RAN
TF	Factor: E2F-2; motif: NTTTTGGCGCCAWWWN	TF:M11528	0.0003008882752531024	3.521594735131598	10466	438	275	19917	ZNF367,AURKA,NRM,HASPIN,MCM8,NUF2,TP53I3,WEE1,PKN3,SHCBP1,CDK2,CDK1,CDCA8,CEP55,FOXM1,KIF14,POLA2,KIF20A,CHST1,DSN1,SGO1,CKS2,GTSE1,KIFC1,TGFB1I1,PRC1,NUSAP1,CHEK2,HJURP,KIF11,ORC1,ASPM,KIF4A,CENPK,NDC80,RASL10A,CHAF1A,CHEK1,IQGAP3,PCOLCE,TROAP,MCM10,CCNA2,OIP5,MYO1C,SKA1,CEP152,SPC24,ZWINT,SMC4,SKA3,DTL,BUB1,NCAPG,CDCA2,MASTL,MKI67,ESPL1,HMMR,MGME1,CENPF,PIM1,CEP135,RAD51AP1,KIF23,KIF18A,POC1A,C…
TF	Factor: CREB; motif: NSTGACGTAANN	TF:M00177	0.00032994765696886107	3.481554951311883	5279	438	157	19917	ZNF367,NRM,SHCBP1,NCAPH,CDCA8,FOXM1,KIF14,POLA2,DSN1,SGO1,CKS2,KIFC1,PRC1,NUSAP1,ORC1,AURKB,ASPM,FANCD2,CCDC86,CENPK,NDC80,CHAF1A,CHEK1,MCM10,GAS1,OIP5,FKBP7,SKA1,WDR76,PLK1,CEP152,SPC24,DEPDC1B,UBE2C,SKA3,DTL,CDCA5,MASTL,MLC1,MGME1,PIM1,RIOK1,SNRPB,RAD51AP1,KIF23,TTK,EXO1,NCAPD2,LMNB1,PCNA,KIF20B,CENPN,C5ORF34,KNL1,CENPH,SLC26A2,SGO2,IGIP,DAP3,POLR1H,CCND1,SF3B3,CENPE,WDR62,ZWILCH,NKIRAS2,GJC1,R…
TF	Factor: CPBP; motif: SNCCCNN; match class: 1	TF:M01822_1	0.0003365247002049353	3.4729830539689193	18835	438	432	19917	ZNF367,DDIAS,AURKA,NRM,HASPIN,MCM8,ASF1B,NUF2,PTTG1,TP53I3,CENPA,WEE1,PKN3,SHCBP1,CDK2,CDK1,NCAPH,CDCA8,CEP55,FOXM1,KIF14,CCNB2,POLA2,KIF20A,TPX2,CHST1,DSN1,SGO1,CKS2,GTSE1,KIFC1,TGFB1I1,PRC1,PIMREG,NUSAP1,KIF2C,BIRC5,CHEK2,HJURP,KIF11,MELK,ORC1,AURKB,ASPM,KIF4A,SFRP2,FANCD2,CCDC86,CENPK,NDC80,FANCC,RASL10A,ARHGAP11A,TOP2A,CHAF1A,ERCC6L,CHEK1,IQGAP3,PCOLCE,TROAP,CDC25C,CDCA3,CCNB1,MCM10,CCNA2,GAS…
TF	Factor: ERG; motif: ACCGGAART; match class: 1	TF:M01752_1	0.0003365247002049353	3.4729830539689193	3740	438	119	19917	DDIAS,HASPIN,MCM8,ASF1B,KIF14,CKS2,KIFC1,TGFB1I1,ORC1,FANCD2,CHAF1A,ERCC6L,MYO1C,PLK1,DEPDC1B,SMC4,CDCA5,MASTL,TRIP13,RIOK1,CEP135,SNRPB,KIF23,KIF18A,RAD51,ZDHHC5,NCAPD2,ZPR1,PARPBP,PRIM2,C5ORF34,CDC20,FANCI,CENPL,SLC26A2,ZYX,POLR1H,MLX,SF3B3,IKBIP,ZWILCH,RPIA,REXO5,RFWD3,TACC3,CKS1B,MND1,MCM3,EIF4A1,MCM5,RFC2,TRAIP,C18ORF54,KNSTRN,A2ML1,DAXX,RAD18,WDHD1,NIP7,EDEM2,DLGAP5,KBTBD11,CD93,MAD2L1,PMM2…
TF	Factor: nerf; motif: NNNCCGGAAGTGN	TF:M09901	0.00034076831879823827	3.4675407883497935	5408	438	160	19917	DDIAS,AURKA,MCM8,ASF1B,CENPA,PKN3,CDK2,CEP55,KIF14,TPX2,SGO1,CKS2,GTSE1,KIFC1,TGFB1I1,PIMREG,HJURP,MELK,AURKB,KIF4A,FANCD2,FANCC,ARHGAP11A,ERCC6L,CDCA3,MYO1C,UBE2C,NCAPG,CDCA2,CDCA5,MASTL,TRIP13,ESPL1,MGME1,RIOK1,SNRPB,KIF23,POC1A,RAD51,TTK,ZDHHC5,NCAPD2,ZPR1,KIF20B,PARPBP,LMNB2,PRIM2,C5ORF34,CDC45,CDC20,FANCI,ZYX,ETNPPL,MLX,SF3B3,IKBIP,NKIRAS2,DSCC1,BORA,RPIA,REXO5,RFWD3,TACC3,TONSL,CKS1B,POLQ,A…
TF	Factor: NRF-1; motif: SYGCGCMTGCGCRNNGSN; match class: 1	TF:M09641_1	0.0003452998369766931	3.461803626690046	997	438	44	19917	HASPIN,POLA2,DSN1,GTSE1,CCDC86,ERCC6L,SKA1,ZWINT,SMC4,DTL,HMMR,CENPN,CBFB,FRMD8,MLX,CKS1B,SREBF1,C18ORF54,MIS18A,RAD18,KBTBD11,MAD2L1,BPHL,PFN1,ORC6,NEIL3,SSH2,CDT1,FBXO5,CORO1C,EZH2,POLH,NOB1,NCAPD3,N4BP1,XRCC2,KIF6,DDX39A,CDC7,JAG1,CKLF,EIF5A,INTS7,RAN
TF	Factor: GABP-alpha; motif: CTTCCK; match class: 1	TF:M01660_1	0.00035334954131370977	3.451795468110555	5163	438	154	19917	DDIAS,AURKA,HASPIN,MCM8,ASF1B,NUF2,CDCA8,CCNB2,SGO1,CKS2,KIFC1,TGFB1I1,NUSAP1,HJURP,MELK,ORC1,FANCD2,CCDC86,FANCC,ARHGAP11A,CDC25C,OIP5,SKA1,PLK1,DTL,BUB1,CDCA5,MASTL,TRIP13,MGME1,RIOK1,SNRPB,KIF23,RAD51,ATAD2,EXO1,ZDHHC5,NCAPD2,ZPR1,RRM2,KIF20B,PARPBP,PRIM2,CDC20,KNL1,FANCI,SLC26A2,SGO2,ZYX,MLX,SF3B3,NKIRAS2,DSCC1,RPIA,REXO5,TACC3,TONSL,CKS1B,POLQ,ARHGEF39,MND1,CENPW,EIF4A1,MCM5,CDKN3,RFC2,C18OR…
TF	Factor: Erg; motif: NACCGGATATCCGGTN; match class: 1	TF:M11391_1	0.00037862286574487564	3.4217931617220416	9162	438	246	19917	DDIAS,HASPIN,MCM8,ASF1B,NUF2,TP53I3,CENPA,WEE1,PKN3,CDK1,FOXM1,KIF14,POLA2,KIF20A,TPX2,CHST1,KIFC1,TGFB1I1,PIMREG,NUSAP1,KIF2C,HJURP,ASPM,KIF4A,SFRP2,RASL10A,TOP2A,CHEK1,PCOLCE,CDCA3,CCNB1,MCM10,OIP5,MYO1C,PLK1,CEP152,DEPDC1B,SMC4,SKA3,DTL,NCAPG,CDCA5,MASTL,MYBL2,MLC1,HMMR,PIM1,RIOK1,CEP135,HMGA1,SNRPB,KIF18A,RAD51,CKAP2L,ATAD2,PBK,BRIP1,ZDHHC5,ZPR1,PCNA,KIF20B,CENPN,E2F2,PRIM2,C5ORF34,CDC45,CBFB…
TF	Factor: ELF2; motif: CCCGGAARYN	TF:M02054	0.0003790788649035479	3.4212704284768547	3087	438	102	19917	DDIAS,AURKA,PKN3,CEP55,KIF14,TPX2,GTSE1,KIFC1,PIMREG,KIF4A,FANCD2,ARHGAP11A,CDCA3,MYO1C,UBE2C,NCAPG,MASTL,TRIP13,RIOK1,CEP135,SNRPB,KIF23,POC1A,ZDHHC5,NCAPD2,PARPBP,LMNB2,C5ORF34,CDC45,ETNPPL,SF3B3,NKIRAS2,RPIA,REXO5,RFWD3,CKS1B,POLQ,ARHGEF39,EIF4A1,MCM5,TRAIP,RACGAP1,KNSTRN,DAXX,RAD18,DEK,TRIM26,NIP7,EDEM2,HAUS8,RTKN2,DLGAP5,BFAR,SIDT1,CD93,MAD2L1,UFD1,PMM2,PFN1,EME1,ZSCAN16,SERPINH1,KDM4D,ORAI1…
TF	Factor: SAP-1; motif: ACCGGAAGTNN	TF:M09607	0.0003931865275242024	3.4054013716184817	4762	438	144	19917	DDIAS,AURKA,HASPIN,MCM8,ASF1B,NUF2,KIF14,CCNB2,TPX2,CHST1,SGO1,CKS2,GTSE1,KIFC1,CHEK2,FANCD2,FANCC,CHAF1A,IQGAP3,TROAP,MYO1C,DEPDC1B,UBE2C,BUB1,NCAPG,CDCA5,MASTL,TRIP13,RIOK1,SNRPB,KIF23,EXO1,ZDHHC5,NCAPD2,ZPR1,PARPBP,LMNB2,PRIM2,C5ORF34,CDC45,KNL1,FANCI,CDC6,ETNPPL,DAP3,MLX,SF3B3,IKBIP,ZWILCH,NKIRAS2,REXO5,RFWD3,CKS1B,POLQ,ARHGEF39,MCM3,EIF4A1,CDKN3,RFC2,TRAIP,RACGAP1,LRR1,KNSTRN,A2ML1,DAXX,DIAP…
TF	Factor: ETF; motif: CCCCGCCCCYN	TF:M07039	0.00039505712906869674	3.403340096664017	16527	438	395	19917	ZNF367,DDIAS,AURKA,NRM,MCM8,ASF1B,NUF2,PTTG1,TP53I3,CENPA,WEE1,PKN3,SHCBP1,CDK2,CDK1,NCAPH,CDCA8,CEP55,FOXM1,KIF14,CCNB2,POLA2,KIF20A,CHST1,DSN1,SGO1,CKS2,GTSE1,KIFC1,TGFB1I1,PRC1,PIMREG,NUSAP1,KIF2C,BIRC5,CHEK2,KIF11,MELK,ORC1,AURKB,ASPM,KIF4A,SFRP2,CCDC86,CENPK,NDC80,FANCC,RASL10A,ARHGAP11A,TOP2A,CHAF1A,ERCC6L,CHEK1,IQGAP3,PCOLCE,TROAP,CDC25C,CDCA3,CCNB1,MCM10,CCNA2,GAS1,OIP5,NTSR2,MYO1C,FKBP7,…
TF	Factor: ER81; motif: NNCCGGAAGYG	TF:M09913	0.0004002991499283894	3.397615332157702	2900	438	97	19917	DDIAS,AURKA,NRM,MCM8,ASF1B,CDK2,CEP55,KIF14,CKS2,KIFC1,TGFB1I1,PIMREG,MELK,AURKB,KIF4A,FANCD2,ARHGAP11A,MYO1C,NCAPG,CDCA2,TRIP13,ESPL1,RIOK1,SNRPB,KIF23,POC1A,ZDHHC5,NCAPD2,LMNB2,C5ORF34,CDC45,CDC20,ZYX,ETNPPL,SF3B3,NKIRAS2,REXO5,RFWD3,TACC3,TONSL,CKS1B,POLQ,ARHGEF39,RFC2,TRAIP,KNTC1,RNASEH2A,DAXX,NIP7,EDEM2,HAUS8,RTKN2,DLGAP5,BFAR,ABT1,MAD2L1,UFD1,PMM2,PFN1,EME1,ZSCAN16,USB1,SERPINH1,ORAI1,DDX19…
TF	Factor: NRF-1; motif: YGCGCATGCGCN	TF:M04059	0.00043340936086070286	3.3631017129371825	1478	438	58	19917	HASPIN,NCAPH,POLA2,DSN1,CKS2,GTSE1,CCDC86,SMC4,SKA3,DTL,NCAPG,HMMR,CENPF,KIF23,PCNA,CENPN,CBFB,KNL1,MLX,CKS1B,PPM1D,SREBF1,TCF19,NR2C2AP,C18ORF54,MIS18A,WDR12,RAD18,MXD3,KBTBD11,BFAR,MAD2L1,BPHL,ORC6,BLOC1S5,NEIL3,SSH2,DNMT1,CDT1,FBXO5,POLH,NOB1,MCM6,NCAPD3,N4BP1,XRCC2,KIF6,DDX39A,CDC7,NXT1,SIKE1,JAG1,PRIM1,CKLF,EIF5A,RCC1,INTS7,RAN
TF	Factor: E2F-1:TBR2; motif: NGGTGNNANGGCGCNNTNNCRNNN	TF:M08523	0.00043923407473794315	3.3573039757149976	12268	438	312	19917	ZNF367,DDIAS,AURKA,NRM,HASPIN,MCM8,CENPA,WEE1,PKN3,SHCBP1,CDK2,NCAPH,CDCA8,CEP55,FOXM1,KIF14,CCNB2,POLA2,KIF20A,CHST1,DSN1,CKS2,GTSE1,KIFC1,PRC1,PIMREG,NUSAP1,KIF2C,BIRC5,CHEK2,HJURP,KIF11,MELK,ASPM,KIF4A,SFRP2,CCDC86,CENPK,FANCC,RASL10A,TOP2A,CHAF1A,ERCC6L,CHEK1,IQGAP3,PCOLCE,CCNB1,GAS1,NTSR2,MYO1C,FKBP7,SKA1,WDR76,PLK1,SPC24,ZWINT,UBE2C,SKA3,NCAPG,MASTL,MYBL2,MKI67,TRIP13,ESPL1,HMMR,CENPF,PIM1,…
TF	Factor: ETV7; motif: NCCGGAANNN; match class: 1	TF:M02071_1	0.00047638440798081455	3.3220424613763058	4495	438	137	19917	MCM8,ASF1B,TP53I3,WEE1,POLA2,DSN1,CKS2,GTSE1,KIFC1,TGFB1I1,HJURP,ORC1,ARHGAP11A,ERCC6L,MYO1C,PLK1,DEPDC1B,NCAPG,MASTL,TRIP13,MGME1,RIOK1,SNRPB,KIF18A,RAD51,EXO1,ZDHHC5,NCAPD2,LMNB1,PARPBP,E2F2,CBFB,CDC20,CENPL,SLC26A2,ZYX,ETNPPL,POLR1H,MLX,SF3B3,IKBIP,DSCC1,RPIA,REXO5,RFWD3,TACC3,TONSL,CKS1B,POLQ,MND1,NR2C2AP,EIF4A1,MCM5,RFC2,TRAIP,C18ORF54,KNTC1,RACGAP1,KNSTRN,DAXX,DEK,WDHD1,TRIM26,NIP7,EDEM2,HA…
TF	Factor: Net; motif: NACCGGAAGTN	TF:M11442	0.0005213322948758772	3.282885371079194	2022	438	73	19917	DDIAS,AURKA,KIF14,TPX2,GTSE1,KIFC1,KIF4A,FANCD2,ARHGAP11A,MYO1C,NCAPG,MASTL,RIOK1,SNRPB,KIF23,ZDHHC5,NCAPD2,LMNB2,C5ORF34,CDC45,ETNPPL,SF3B3,NKIRAS2,REXO5,RFWD3,CKS1B,POLQ,ARHGEF39,TRAIP,RACGAP1,KNSTRN,DAXX,RAD18,DEK,EDEM2,RTKN2,DLGAP5,BFAR,CD93,MAD2L1,UFD1,PMM2,PFN1,EME1,ZSCAN16,SERPINH1,ORAI1,DDX19B,DYNLRB2,DNMT1,PAK1IP1,BRCA2,DPP9,CORO1C,C11ORF24,KMT5A,TBC1D31,NCAPD3,VMP1,MDH2,PRPF4,UTP4,CARHS…
TF	Factor: Zfp206; motif: TGCGCAKGCGC; match class: 1	TF:M01742_1	0.0005410448667132302	3.2667667190745164	67	438	9	19917	HASPIN,GTSE1,CCDC86,HMMR,SREBF1,ORC6,NOB1,NCAPD3,KIF6
TF	Factor: Nkx3-2; motif: NTCGTTAN	TF:M10625	0.0005447335826007835	3.2638158498257708	6131	438	176	19917	ZNF367,DDIAS,AURKA,HASPIN,MCM8,NUF2,TP53I3,CENPA,WEE1,PKN3,NCAPH,KIF14,POLA2,TPX2,DSN1,SGO1,CKS2,PRC1,PIMREG,NUSAP1,KIF2C,KIF11,ORC1,ASPM,KIF4A,FANCD2,CCDC86,CENPK,ARHGAP11A,TOP2A,CHAF1A,ERCC6L,PCOLCE,CDC25C,CDCA3,CCNB1,MCM10,GAS1,OIP5,SKA1,WDR76,CEP152,SMC4,UBE2C,SKA3,DTL,BUB1,NCAPG,CDCA2,MLC1,MKI67,ESCO2,ESPL1,HMMR,PIM1,HMGA1,SNRPB,KIF23,ATAD2,EXO1,LMNB1,PCNA,PARPBP,PRIM2,CDC45,CDC20,PON1,CENPH…
TF	Factor: Erg; motif: NACCGGAARTN; match class: 1	TF:M11396_1	0.000600949075692712	3.2211623284676136	5009	438	149	19917	DDIAS,AURKA,MCM8,ASF1B,TP53I3,WEE1,KIF14,POLA2,SGO1,CKS2,GTSE1,KIFC1,TGFB1I1,HJURP,ORC1,FANCD2,ARHGAP11A,ERCC6L,CHEK1,MCM10,CCNA2,GAS1,MYO1C,PLK1,DEPDC1B,SMC4,CDCA5,MASTL,TRIP13,RIOK1,CEP135,SNRPB,KIF18A,RAD51,ZDHHC5,NCAPD2,ZPR1,LMNB1,ECT2,PARPBP,E2F2,CBFB,CDC20,FANCI,CENPL,SLC26A2,CDC6,ZYX,DAP3,POLR1H,MLX,SF3B3,IKBIP,WDR62,ZWILCH,NKIRAS2,DSCC1,BORA,RPIA,REXO5,RFWD3,TACC3,CKS1B,MND1,MCM3,EIF4A1,M…
TF	Factor: GABP-alpha; motif: NACCGGAAGTN	TF:M11414	0.000655918020518742	3.1831504372419777	2938	438	97	19917	DDIAS,AURKA,NRM,ASF1B,CDK2,KIF14,TPX2,CKS2,GTSE1,KIFC1,TGFB1I1,AURKB,KIF4A,FANCD2,ARHGAP11A,MYO1C,DEPDC1B,UBE2C,NCAPG,MASTL,RIOK1,SNRPB,KIF23,ZDHHC5,NCAPD2,KIF20B,LMNB2,PRIM2,C5ORF34,CDC45,SLC26A2,ETNPPL,SF3B3,NKIRAS2,REXO5,RFWD3,CKS1B,POLQ,ARHGEF39,RFC2,TRAIP,RACGAP1,RNASEH2A,KNSTRN,DAXX,RAD18,DEK,NIP7,EDEM2,RTKN2,DLGAP5,BFAR,ABT1,SIDT1,CD93,MAD2L1,UFD1,PMM2,PFN1,EME1,ZSCAN16,USB1,SERPINH1,ORAI1…
TF	Factor: Elk-1; motif: RCCGGAAGTGN	TF:M09904	0.000655918020518742	3.1831504372419777	8239	438	224	19917	ZNF367,DDIAS,AURKA,NRM,HASPIN,MCM8,ASF1B,NUF2,TP53I3,CENPA,WEE1,PKN3,CDK2,CEP55,KIF14,CCNB2,TPX2,CHST1,SGO1,CKS2,GTSE1,KIFC1,TGFB1I1,PIMREG,CHEK2,HJURP,MELK,ORC1,AURKB,KIF4A,FANCD2,FANCC,ARHGAP11A,ERCC6L,IQGAP3,TROAP,CDCA3,CCNB1,MYO1C,SKA1,PLK1,DEPDC1B,SMC4,UBE2C,BUB1,NCAPG,CDCA2,CDCA5,MASTL,TRIP13,ESPL1,MGME1,RIOK1,CEP135,HMGA1,SNRPB,KIF23,POC1A,RAD51,TTK,ZDHHC5,NCAPD2,ZPR1,KIF20B,PARPBP,LMNB2,P…
TF	Factor: CHD2; motif: TCTCGCGAG	TF:M04710	0.0006577135074258304	3.181963238967465	14245	438	351	19917	ZNF367,DDIAS,AURKA,NRM,HASPIN,MCM8,ASF1B,NUF2,CENPA,WEE1,PKN3,CDK1,NCAPH,CDCA8,FOXM1,KIF14,CCNB2,POLA2,KIF20A,DSN1,SGO1,CKS2,GTSE1,KIFC1,PRC1,PIMREG,NUSAP1,KIF2C,BIRC5,HJURP,KIF11,MELK,ORC1,SFRP2,FANCD2,CCDC86,CENPK,NDC80,FANCC,RASL10A,ARHGAP11A,TOP2A,CHAF1A,ERCC6L,IQGAP3,PCOLCE,CDCA3,CCNB1,MCM10,CCNA2,GAS1,OIP5,NTSR2,MYO1C,FKBP7,WDR76,PLK1,CEP152,DEPDC1B,SMC4,UBE2C,SKA3,DTL,NCAPG,CDCA2,CDCA5,MAS…
TF	Factor: CREB1; motif: TKACGTCAYNN; match class: 1	TF:M09600_1	0.0007258053433194816	3.139179838883294	1577	438	60	19917	ZNF367,AURKA,DSN1,CKS2,PRC1,FANCD2,CCDC86,NDC80,CHAF1A,CHEK1,MCM10,CCNA2,SKA1,CEP152,DTL,CDCA5,MASTL,MGME1,RIOK1,TTK,PBK,EXO1,CENPN,SGO2,POLR1H,CENPE,WDR62,ZWILCH,PPM1D,SREBF1,MCM2,CENPW,CDKN3,DEPDC1,MLXIP,DAAM2,TRIM26,NIP7,SIDT1,RFC3,MCAM,BRCA2,KIF15,DGCR6,C11ORF24,UBE2T,B4GALT3,NUP188,N4BP1,XRCC2,CDC25B,PINX1,FSTL5,H2BC15,CCDC77,CBX8,INTS7,ODF2,ISG20L2,WDR53
TF	Factor: ELF4; motif: NCCGGAARTN; match class: 1	TF:M02056_1	0.0007304921269085906	3.1363844604395825	1300	438	52	19917	KIFC1,ORC1,FANCD2,MYO1C,DEPDC1B,CDCA5,MASTL,TRIP13,RIOK1,SNRPB,KIF23,ZDHHC5,NCAPD2,ZPR1,C5ORF34,CDC45,CENPL,DAP3,POLR1H,REXO5,RFWD3,CKS1B,TRAIP,KNSTRN,DAXX,NSMCE2,NIP7,CD93,MAD2L1,UFD1,PMM2,PFN1,LOXL2,STUM,EME1,DNMT1,PAK1IP1,BRCA2,MTFR2,DPP9,C11ORF24,TBC1D31,POLR3D,CDC25B,RARS2,VMP1,MDH2,CARHSP1,EXOSC3,RCC1,POLR2D,ISG20L2
TF	Factor: ER71; motif: NACCGGAARTN	TF:M11413	0.0007756825718683851	3.1103159662281357	2122	438	75	19917	DDIAS,AURKA,KIF14,TPX2,GTSE1,KIFC1,KIF4A,FANCD2,MYO1C,DEPDC1B,UBE2C,NCAPG,MASTL,RIOK1,SNRPB,KIF23,ZDHHC5,NCAPD2,LMNB2,C5ORF34,CDC45,ETNPPL,SF3B3,NKIRAS2,REXO5,RFWD3,CKS1B,POLQ,ARHGEF39,TRAIP,RACGAP1,KNSTRN,DAXX,RAD18,DEK,NIP7,EDEM2,RTKN2,DLGAP5,BFAR,SIDT1,CD93,MAD2L1,UFD1,PMM2,PFN1,EME1,ZSCAN16,ORAI1,DDX19B,DNMT1,PAK1IP1,BRCA2,DPP9,CORO1C,C11ORF24,KMT5A,TBC1D31,NCAPD3,CDC25B,VMP1,MDH2,PRPF4,UTP4,…
TF	Factor: c-Ets-2; motif: NCCGGAAGTG	TF:M08759	0.0007944263590711833	3.0999463543801915	8396	438	227	19917	DDIAS,AURKA,NRM,HASPIN,MCM8,ASF1B,NUF2,CENPA,WEE1,PKN3,SHCBP1,CDK2,CEP55,KIF14,CCNB2,TPX2,CHST1,SGO1,CKS2,GTSE1,KIFC1,TGFB1I1,PIMREG,HJURP,MELK,ORC1,AURKB,KIF4A,FANCD2,FANCC,ARHGAP11A,CHAF1A,ERCC6L,TROAP,CDCA3,CCNB1,MYO1C,SKA1,PLK1,DEPDC1B,SMC4,UBE2C,NCAPG,CDCA2,CDCA5,MASTL,TRIP13,ESPL1,MGME1,RIOK1,CEP135,SNRPB,KIF23,POC1A,RAD51,TTK,EXO1,ZDHHC5,NCAPD2,ZPR1,ECT2,KIF20B,ALDOC,PARPBP,LMNB2,PRIM2,C5O…
TF	Factor: c-ets-2; motif: ACCGGAWRTN; match class: 1	TF:M02064_1	0.0007944263590711833	3.0999463543801915	4626	438	139	19917	DDIAS,AURKA,MCM8,ASF1B,TP53I3,WEE1,KIF14,TPX2,CKS2,KIFC1,TGFB1I1,HJURP,KIF11,ORC1,AURKB,FANCD2,CCNB1,MCM10,MYO1C,CEP152,ZWINT,DEPDC1B,SMC4,NCAPG,CDCA5,TRIP13,RIOK1,CEP135,SNRPB,RAD51AP1,RAD51,EXO1,ZDHHC5,NCAPD2,ECT2,PARPBP,PRIM2,C5ORF34,FANCI,CENPL,SLC26A2,CDC6,TIMELESS,VKORC1,POLR1H,MLX,SF3B3,IKBIP,WDR62,NKIRAS2,DSCC1,BORA,RPIA,REXO5,RFWD3,TONSL,CKS1B,EIF4A1,RFC2,TRAIP,C18ORF54,RACGAP1,WDR12,DAX…
TF	Factor: pax-6; motif: NYACGCWTSANYGMNCN	TF:M11880	0.0008494043222236102	3.0708855334170515	13224	438	330	19917	ZNF367,DDIAS,AURKA,NRM,HASPIN,MCM8,ASF1B,PTTG1,TP53I3,WEE1,PKN3,CDK2,NCAPH,CDCA8,FOXM1,KIF14,CCNB2,POLA2,CHST1,DSN1,CKS2,GTSE1,KIFC1,TGFB1I1,PIMREG,NUSAP1,KIF2C,BIRC5,CHEK2,HJURP,KIF11,MELK,AURKB,ASPM,KIF4A,SFRP2,CCDC86,CENPK,RASL10A,TOP2A,CHAF1A,ERCC6L,CHEK1,IQGAP3,PCOLCE,CDCA3,CCNB1,CCNA2,GAS1,OIP5,NTSR2,MYO1C,FKBP7,SKA1,WDR76,CEP152,DEPDC1B,SMC4,UBE2C,SKA3,DTL,NCAPG,CDCA2,CDCA5,MASTL,MYBL2,MLC…
TF	Factor: Elk-1; motif: NNNNCCGGAARTNN; match class: 1	TF:M00025_1	0.0008506073005678165	3.0702708941558408	4674	438	140	19917	HASPIN,MCM8,ASF1B,TP53I3,WEE1,POLA2,DSN1,SGO1,CKS2,GTSE1,KIFC1,TGFB1I1,HJURP,ORC1,FANCD2,ARHGAP11A,CHAF1A,ERCC6L,MYO1C,PLK1,DEPDC1B,SMC4,NCAPG,CDCA5,MASTL,TRIP13,RIOK1,SNRPB,KIF23,KIF18A,RAD51,EXO1,ZDHHC5,NCAPD2,ZPR1,LMNB1,PARPBP,E2F2,CBFB,CDC20,FANCI,SLC26A2,ZYX,POLR1H,MLX,SF3B3,ZWILCH,DSCC1,RPIA,REXO5,RFWD3,TACC3,CKS1B,POLQ,NR2C2AP,EIF4A1,MCM5,RFC2,TRAIP,C18ORF54,RACGAP1,KNSTRN,A2ML1,DAXX,DEK,W…
TF	Factor: XBP-1; motif: WNNGMCACGTC	TF:M01770	0.0008939175245021156	3.048702548660392	11113	438	286	19917	ZNF367,AURKA,HASPIN,MCM8,ASF1B,NUF2,PTTG1,WEE1,SHCBP1,CDK1,NCAPH,CDCA8,CEP55,FOXM1,CCNB2,POLA2,KIF20A,DSN1,SGO1,CKS2,GTSE1,KIFC1,PRC1,PIMREG,KIF2C,BIRC5,CHEK2,HJURP,KIF11,MELK,ORC1,ASPM,KIF4A,SFRP2,FANCD2,CCDC86,CENPK,NDC80,FANCC,RASL10A,ARHGAP11A,CHEK1,CDC25C,CDCA3,MCM10,NTSR2,MYO1C,SKA1,PLK1,CEP152,SPC24,SMC4,UBE2C,SKA3,DTL,BUB1,NCAPG,CDCA2,CDCA5,MYBL2,MLC1,MKI67,TRIP13,ESCO2,ESPL1,MGME1,CENPF,…
TF	Factor: HOXB2:PEA3; motif: ACCGGAAATGRN	TF:M08345	0.0008965045861975809	3.047447484400507	8100	438	220	19917	DDIAS,AURKA,NRM,ASF1B,WEE1,SHCBP1,KIF14,KIF20A,TPX2,DSN1,GTSE1,KIFC1,PRC1,NUSAP1,KIF2C,HJURP,KIF11,MELK,ORC1,FANCD2,CENPK,FANCC,ARHGAP11A,TOP2A,CHAF1A,CHEK1,MCM10,CCNA2,GAS1,OIP5,MYO1C,FKBP7,ZWINT,DEPDC1B,SMC4,SKA3,NCAPG,CDCA2,CDCA5,MASTL,MYBL2,TRIP13,HMMR,CENPF,PIM1,CEP135,SNRPB,KIF23,KIF18A,ZDHHC5,CENPM,NCAPD2,LMNB1,KIF20B,CENPN,PARPBP,E2F2,LMNB2,PRIM2,C5ORF34,CDC45,CBFB,PON1,CENPL,SLC26A2,TK1,…
TF	Factor: ER81; motif: NACCGGAAGTN	TF:M11421	0.0008965045861975809	3.047447484400507	2356	438	81	19917	DDIAS,AURKA,KIF14,TPX2,GTSE1,KIFC1,KIF4A,FANCD2,ARHGAP11A,MYO1C,DEPDC1B,UBE2C,NCAPG,MASTL,RIOK1,SNRPB,KIF23,ZDHHC5,NCAPD2,LMNB2,C5ORF34,CDC45,ETNPPL,SF3B3,NKIRAS2,REXO5,RFWD3,CKS1B,POLQ,ARHGEF39,TRAIP,RACGAP1,KNSTRN,DAXX,RAD18,DEK,NIP7,EDEM2,RTKN2,DLGAP5,BFAR,SIDT1,CD93,MAD2L1,UFD1,PMM2,PFN1,EME1,ZSCAN16,SERPINH1,ORAI1,DDX19B,DYNLRB2,DNMT1,PAK1IP1,BRCA2,DPP9,CORO1C,C11ORF24,KMT5A,TBC1D31,HELLS,NC…
TF	Factor: NRF-1; motif: CGCATGCGCR; match class: 1	TF:M00652_1	0.0009107301895367189	3.0406102668809516	318	438	20	19917	HASPIN,POLA2,DSN1,GTSE1,CCDC86,SMC4,HMMR,MLX,SREBF1,C18ORF54,MIS18A,ORC6,DNMT1,CDT1,POLH,NOB1,NCAPD3,KIF6,CKLF,RAN
TF	Factor: ESE-1; motif: NSMGGAARTN	TF:M02055	0.000959240411039072	3.018072533493871	7623	438	209	19917	ZNF367,DDIAS,AURKA,NRM,HASPIN,MCM8,ASF1B,NUF2,WEE1,PKN3,SHCBP1,CEP55,FOXM1,KIF14,CCNB2,TPX2,CHST1,SGO1,CKS2,GTSE1,KIFC1,TGFB1I1,PIMREG,ORC1,AURKB,KIF4A,FANCD2,NDC80,FANCC,RASL10A,ARHGAP11A,CHAF1A,TROAP,CDCA3,MCM10,MYO1C,DEPDC1B,SMC4,UBE2C,BUB1,NCAPG,CDCA5,MASTL,MYBL2,TRIP13,CENPF,RIOK1,CEP135,SNRPB,RAD51AP1,KIF23,POC1A,EXO1,ZDHHC5,NCAPD2,ZPR1,ECT2,KIF20B,ALDOC,PARPBP,LMNB2,PRIM2,C5ORF34,CDC45,KNL…
TF	Factor: ESE-1; motif: NSMGGAARTN	TF:M01214	0.000959240411039072	3.018072533493871	7623	438	209	19917	ZNF367,DDIAS,AURKA,NRM,HASPIN,MCM8,ASF1B,NUF2,WEE1,PKN3,SHCBP1,CEP55,FOXM1,KIF14,CCNB2,TPX2,CHST1,SGO1,CKS2,GTSE1,KIFC1,TGFB1I1,PIMREG,ORC1,AURKB,KIF4A,FANCD2,NDC80,FANCC,RASL10A,ARHGAP11A,CHAF1A,TROAP,CDCA3,MCM10,MYO1C,DEPDC1B,SMC4,UBE2C,BUB1,NCAPG,CDCA5,MASTL,MYBL2,TRIP13,CENPF,RIOK1,CEP135,SNRPB,RAD51AP1,KIF23,POC1A,EXO1,ZDHHC5,NCAPD2,ZPR1,ECT2,KIF20B,ALDOC,PARPBP,LMNB2,PRIM2,C5ORF34,CDC45,KNL…
TF	Factor: ATF-2; motif: NRTGACGTMANN; match class: 1	TF:M11309_1	0.0009689418056373739	3.013702305766067	2325	438	80	19917	ZNF367,AURKA,DSN1,SGO1,CKS2,PRC1,ASPM,FANCD2,CCDC86,NDC80,CHAF1A,CHEK1,PCOLCE,MCM10,CCNA2,DTL,CDCA5,MASTL,MGME1,TTK,PBK,EXO1,LMNB1,CENPN,C5ORF34,KNL1,CENPH,SGO2,POLR1H,CCND1,CENPE,WDR62,ZWILCH,PPM1D,SREBF1,MCM2,ACOX2,CENPW,MCM3,EIF4A1,DEPDC1,MLXIP,LRR1,DAAM2,RAD18,TRIM26,NIP7,DLGAP5,SIDT1,RFC3,CFAP20,DDX19B,LRRN4CL,MCAM,KIF15,IGFN1,DGCR6,C11ORF24,RAD54L,UBE2T,POLR3D,N4BP1,XRCC2,VMP1,DTYMK,RRP1B,D…
TF	Factor: CREB; motif: CNNTGACGTMA	TF:M00917	0.0009848460511671497	3.0066316520952423	5647	438	163	19917	ZNF367,DDIAS,AURKA,NUF2,CENPA,SHCBP1,CDK2,CDK1,NCAPH,CEP55,KIF20A,DSN1,SGO1,CKS2,KIFC1,PRC1,KIF2C,ORC1,AURKB,ASPM,FANCD2,CCDC86,CENPK,NDC80,FANCC,TOP2A,CHAF1A,CHEK1,PCOLCE,MCM10,CCNA2,NTSR2,SKA1,CEP152,SPC24,DEPDC1B,SMC4,DTL,CDCA2,CDCA5,MASTL,TRIP13,HMMR,MGME1,PIM1,RIOK1,SNRPB,TTK,PBK,EXO1,NCAPD2,CENPN,C5ORF34,KNL1,CENPH,SGO2,IGIP,CAV1,DAP3,POLR1H,CCND1,CENPE,IKBIP,WDR62,ZWILCH,NKIRAS2,PPM1D,SREB…
TF	Factor: GABP-alpha; motif: NRCCGGAAGTN	TF:M11415	0.001035953465358238	2.984659752498155	3289	438	105	19917	DDIAS,AURKA,NRM,ASF1B,CDK2,KIF14,TPX2,CKS2,GTSE1,KIFC1,TGFB1I1,MELK,AURKB,KIF4A,FANCD2,ARHGAP11A,MYO1C,UBE2C,NCAPG,MASTL,ESPL1,RIOK1,SNRPB,KIF23,ZDHHC5,NCAPD2,KIF20B,LMNB2,PRIM2,C5ORF34,CDC45,CDC20,SLC26A2,ZYX,ETNPPL,SF3B3,NKIRAS2,REXO5,RFWD3,TACC3,CKS1B,POLQ,ARHGEF39,RFC2,TRAIP,RACGAP1,RNASEH2A,KNSTRN,DAXX,RAD18,DEK,EDEM2,RTKN2,DLGAP5,BFAR,ABT1,SIDT1,CD93,MAD2L1,UFD1,PMM2,PFN1,EME1,ZSCAN16,USB1,…
TF	Factor: FLI1; motif: ACCGGAAATCCGGT	TF:M03989	0.0010743073786907188	2.968871441383153	10530	438	273	19917	DDIAS,NRM,MCM8,ASF1B,NUF2,TP53I3,CENPA,WEE1,PKN3,FOXM1,KIF14,POLA2,KIF20A,TPX2,CHST1,GTSE1,KIFC1,TGFB1I1,PIMREG,NUSAP1,HJURP,MELK,ORC1,ASPM,KIF4A,SFRP2,CENPK,NDC80,FANCC,RASL10A,TOP2A,PCOLCE,TROAP,CDCA3,CCNB1,CCNA2,OIP5,MYO1C,WDR76,PLK1,CEP152,DEPDC1B,SMC4,SKA3,DTL,NCAPG,CDCA5,MASTL,MYBL2,MLC1,TRIP13,ESCO2,HMMR,MGME1,PIM1,RIOK1,CEP135,HMGA1,SNRPB,RAD51AP1,KIF23,KIF18A,CKAP2L,TTK,PBK,EXO1,ZDHHC5,N…
TF	Factor: NRF-1; motif: CNCTGCGCATGCGC	TF:M04694	0.0010882298042984493	2.963279383865604	1568	438	59	19917	AURKA,HASPIN,NCAPH,CKS2,GTSE1,CCDC86,CCNB1,SKA1,SPC24,ZWINT,SMC4,SKA3,DTL,HMMR,CENPF,POC1A,PCNA,KNL1,MLX,PPM1D,SREBF1,MCM2,MND1,TCF19,C18ORF54,MIS18A,WDR12,RAD18,MXD3,WDHD1,NSMCE2,EDEM2,RTKN2,MAD2L1,BPHL,PFN1,ORC6,CKAP2,BLOC1S5,NEIL3,DYNLRB2,SSH2,CCNF,FBXO5,GLE1,POLH,NOB1,MCM6,NCAPD3,XRCC2,KIF6,CDC7,SIKE1,H2BC15,PRIM1,CKLF,EIF5A,RCC1,INTS7
TF	Factor: ERG; motif: ACCGGAWATCCGGT	TF:M03976	0.0010882298042984493	2.963279383865604	12913	438	323	19917	DDIAS,NRM,MCM8,ASF1B,NUF2,TP53I3,CENPA,WEE1,PKN3,NCAPH,CDCA8,FOXM1,KIF14,CCNB2,POLA2,KIF20A,TPX2,CHST1,CKS2,GTSE1,KIFC1,PIMREG,NUSAP1,BIRC5,HJURP,MELK,ORC1,ASPM,KIF4A,SFRP2,CENPK,NDC80,RASL10A,TOP2A,CHEK1,PCOLCE,TROAP,CDCA3,CCNB1,CCNA2,GAS1,OIP5,NTSR2,MYO1C,FKBP7,WDR76,PLK1,CEP152,DEPDC1B,SMC4,SKA3,DTL,NCAPG,CDCA5,MASTL,MYBL2,MLC1,MKI67,TRIP13,ESCO2,ESPL1,HMMR,MGME1,PIM1,RIOK1,CEP135,HMGA1,SNRPB,…
TF	Factor: c-ets-2; motif: ACCGGAWRTN	TF:M02064	0.0011152707230391579	2.9526196983101167	11050	438	284	19917	ZNF367,DDIAS,AURKA,NRM,HASPIN,MCM8,ASF1B,TP53I3,WEE1,PKN3,CDK2,CEP55,FOXM1,KIF14,TPX2,SGO1,CKS2,GTSE1,KIFC1,TGFB1I1,PRC1,PIMREG,CHEK2,HJURP,KIF11,MELK,ORC1,AURKB,ASPM,KIF4A,FANCD2,CCDC86,CENPK,NDC80,ARHGAP11A,CHAF1A,ERCC6L,CHEK1,IQGAP3,TROAP,CDC25C,CDCA3,CCNB1,MCM10,GAS1,MYO1C,FKBP7,SKA1,PLK1,CEP152,ZWINT,DEPDC1B,SMC4,UBE2C,BUB1,NCAPG,CDCA2,CDCA5,MASTL,MLC1,MKI67,TRIP13,ESPL1,HMMR,MGME1,CENPF,PIM…
TF	Factor: LKLF; motif: NGGGCGG	TF:M05499	0.0011152707230391579	2.9526196983101167	7952	438	216	19917	ZNF367,AURKA,PTTG1,TP53I3,CENPA,WEE1,SHCBP1,NCAPH,CDCA8,KIF14,CCNB2,POLA2,KIF20A,TGFB1I1,PIMREG,NUSAP1,KIF2C,ORC1,AURKB,ASPM,SFRP2,RASL10A,TOP2A,ERCC6L,CHEK1,IQGAP3,PCOLCE,CCNB1,GAS1,OIP5,MYO1C,SKA1,CEP152,ZWINT,DEPDC1B,SMC4,UBE2C,DTL,BUB1,NCAPG,CDCA2,MASTL,MYBL2,MLC1,MKI67,ESCO2,HMMR,MGME1,CENPF,PIM1,CEP135,HMGA1,SNRPB,RAD51AP1,KIF23,KIF18A,POC1A,RAD51,CKAP2L,ATAD2,TTK,EXO1,CENPM,NCAPD2,LMNB1,EC…
TF	Factor: KLF17; motif: NGGGCGG	TF:M05386	0.0011152707230391579	2.9526196983101167	7952	438	216	19917	ZNF367,AURKA,PTTG1,TP53I3,CENPA,WEE1,SHCBP1,NCAPH,CDCA8,KIF14,CCNB2,POLA2,KIF20A,TGFB1I1,PIMREG,NUSAP1,KIF2C,ORC1,AURKB,ASPM,SFRP2,RASL10A,TOP2A,ERCC6L,CHEK1,IQGAP3,PCOLCE,CCNB1,GAS1,OIP5,MYO1C,SKA1,CEP152,ZWINT,DEPDC1B,SMC4,UBE2C,DTL,BUB1,NCAPG,CDCA2,MASTL,MYBL2,MLC1,MKI67,ESCO2,HMMR,MGME1,CENPF,PIM1,CEP135,HMGA1,SNRPB,RAD51AP1,KIF23,KIF18A,POC1A,RAD51,CKAP2L,ATAD2,TTK,EXO1,CENPM,NCAPD2,LMNB1,EC…
TF	Factor: NRF-1; motif: YGCGCMTGCGC	TF:M02102	0.0011175436123247405	2.951735519451155	2040	438	72	19917	AURKA,HASPIN,NCAPH,POLA2,TPX2,DSN1,GTSE1,CCDC86,CCNB1,SKA1,SPC24,ZWINT,SMC4,SKA3,DTL,HMMR,CENPF,CEP135,PCNA,CENPN,CBFB,KNL1,TIMELESS,DAP3,MLX,CKS1B,PPM1D,SREBF1,MCM2,CDCA4,TCF19,C18ORF54,MIS18A,WDR12,RAD18,C16ORF87,WDHD1,NSMCE2,EDEM2,RTKN2,KBTBD11,MAD2L1,BPHL,PFN1,CNOT1,ORC6,CKAP2,BLOC1S5,NEIL3,DYNLRB2,DNMT1,CCNF,CDT1,GLE1,MCM4,NOB1,MCM6,NCAPD3,N4BP1,XRCC2,KIF6,DTYMK,DDX39A,CDC7,TUBB,JAG1,H2BC15,…
TF	Factor: Elf-1; motif: NANGCGGAAGTN; match class: 1	TF:M11448_1	0.0011792433510343986	2.9283965637718614	2341	438	80	19917	DDIAS,HASPIN,MCM8,ASF1B,NUF2,CDCA8,SGO1,CKS2,KIFC1,ORC1,FANCD2,FANCC,ARHGAP11A,BUB1,CDCA5,MASTL,TRIP13,RIOK1,SNRPB,KIF23,RAD51,ZDHHC5,NCAPD2,ZPR1,PARPBP,PRIM2,KNL1,FANCI,SLC26A2,SGO2,MLX,SF3B3,NKIRAS2,DSCC1,REXO5,CKS1B,ARHGEF39,CDKN3,RFC2,WDR12,KNSTRN,A2ML1,DIAPH1,WDHD1,HAUS8,MAD2L1,PMM2,PFN1,EME1,E2F7,CFAP20,KDM4D,DNMT1,PAK1IP1,TRMT6,BRCA2,GPN1,MTFR2,DPP9,C11ORF24,FAAP24,POLH,HAUS1,POLR3D,NEMP1,…
TF	Factor: Nkx2-3; motif: GNCGTTRAG; match class: 1	TF:M10635_1	0.0011949163779000605	2.922662486253321	734	438	34	19917	CDK2,KIF14,TGFB1I1,PRC1,SFRP2,SMC4,EXO1,ZDHHC5,LMNB2,CENPL,SLC26A2,SGO2,DAP3,POLR1H,DSCC1,MND1,DLGAP5,SLC1A4,ORC6,DYNLRB2,SSH2,TRMT6,BTG3,NUP188,HAUS1,FOXD2,SOGA1,DESI2,TMEM45A,ZSCAN9,CKLF,ODF2,NUP93,KPNB1
TF	Factor: GABP-ALPHA; motif: RCCGGAARTNN	TF:M08917	0.001234961381843122	2.9083466229020174	2724	438	90	19917	DDIAS,AURKA,WEE1,KIF14,TPX2,GTSE1,KIFC1,KIF4A,FANCD2,ARHGAP11A,MYO1C,DEPDC1B,SMC4,UBE2C,NCAPG,CDCA5,MASTL,RIOK1,CEP135,SNRPB,KIF23,ZDHHC5,NCAPD2,LMNB2,C5ORF34,CDC45,ETNPPL,SF3B3,NKIRAS2,REXO5,RFWD3,CKS1B,POLQ,ARHGEF39,TRAIP,RACGAP1,KNSTRN,DAXX,RAD18,DEK,NIP7,EDEM2,RTKN2,DLGAP5,BFAR,SIDT1,CD93,MAD2L1,UFD1,PMM2,PFN1,EME1,E2F7,ZSCAN16,SERPINH1,ORAI1,DDX19B,DYNLRB2,TPM4,DNMT1,PAK1IP1,BRCA2,DPP9,CORO1…
TF	Factor: ATF2; motif: VGTGACGTMACN	TF:M00179	0.0012349851317193365	2.9083382709477306	6141	438	174	19917	ZNF367,DDIAS,AURKA,NUF2,CENPA,SHCBP1,CDK2,CDK1,NCAPH,CEP55,FOXM1,KIF20A,DSN1,SGO1,CKS2,KIFC1,PRC1,MELK,ORC1,AURKB,ASPM,FANCD2,CCDC86,CENPK,NDC80,FANCC,CHAF1A,CHEK1,PCOLCE,CDCA3,MCM10,CCNA2,NTSR2,SKA1,WDR76,CEP152,SPC24,DEPDC1B,SMC4,UBE2C,SKA3,DTL,CDCA2,CDCA5,MASTL,MKI67,TRIP13,HMMR,MGME1,PIM1,RIOK1,SNRPB,RAD51AP1,KIF23,TTK,PBK,EXO1,NCAPD2,PCNA,KIF20B,CENPN,C5ORF34,KNL1,CENPH,SGO2,IGIP,ETNPPL,DAP3…
TF	Factor: Erg; motif: ACCGGAAGTN	TF:M02062	0.0012349851317193365	2.9083382709477306	8143	438	220	19917	DDIAS,AURKA,NRM,MCM8,ASF1B,TP53I3,CENPA,WEE1,PKN3,SHCBP1,CDK2,CEP55,KIF14,TPX2,CKS2,GTSE1,KIFC1,TGFB1I1,PRC1,PIMREG,HJURP,MELK,ORC1,AURKB,KIF4A,FANCD2,CENPK,NDC80,ARHGAP11A,CHAF1A,ERCC6L,CHEK1,CDC25C,CDCA3,CCNB1,MCM10,CCNA2,MYO1C,FKBP7,SKA1,PLK1,DEPDC1B,SMC4,UBE2C,NCAPG,CDCA2,CDCA5,MASTL,MLC1,TRIP13,ESPL1,MGME1,RIOK1,CEP135,SNRPB,KIF23,POC1A,RAD51,TTK,EXO1,ZDHHC5,NCAPD2,RRM2,KIF20B,PARPBP,E2F2,LM…
TF	Factor: ATF-1; motif: NNRTGACGYMA	TF:M09866	0.001290019872770595	2.889403599337858	3193	438	102	19917	ZNF367,SHCBP1,NCAPH,CEP55,DSN1,SGO1,CKS2,PRC1,AURKB,ASPM,FANCD2,CCDC86,CENPK,NDC80,CHAF1A,CHEK1,PCOLCE,MCM10,CCNA2,SKA1,CEP152,DEPDC1B,DTL,CDCA2,CDCA5,MASTL,HMMR,MGME1,RIOK1,TTK,PBK,EXO1,NCAPD2,KIF20B,CENPN,KNL1,SGO2,IGIP,CAV1,POLR1H,CCND1,CENPE,WDR62,ZWILCH,PPM1D,SREBF1,MCM2,CDCA4,CENPW,MCM3,EIF4A1,CDKN3,RFC2,DEPDC1,MLXIP,RACGAP1,RNASEH2A,DAAM2,RAD18,TRIM26,NIP7,HAUS8,SIDT1,RFC3,SLC1A4,BRCA1,CFA…
TF	Factor: CREB; motif: NSTGACGTMANN; match class: 1	TF:M00178_1	0.0013019134181881395	2.885417896914854	1545	438	58	19917	ZNF367,AURKA,DSN1,SGO1,CKS2,PRC1,FANCD2,CCDC86,NDC80,CHAF1A,CHEK1,MCM10,CCNA2,SKA1,CEP152,DTL,CDCA5,MASTL,MGME1,RIOK1,TTK,PBK,EXO1,CENPN,SGO2,POLR1H,CENPE,WDR62,ZWILCH,PPM1D,MCM2,CENPW,CDKN3,DEPDC1,MLXIP,DAAM2,TRIM26,SIDT1,RFC3,MCAM,BRCA2,CDT1,KIF15,DGCR6,C11ORF24,NUP188,N4BP1,XRCC2,PINX1,FSTL5,H2BC15,CCDC77,HROB,CBX8,INTS7,PRXL2C,ISG20L2,WDR53
TF	Factor: Zfp206; motif: TGCGCAKGCGC	TF:M01742	0.0013072873858147027	2.8836289293637805	276	438	18	19917	HASPIN,GTSE1,CCDC86,SMC4,DTL,HMMR,MLX,SREBF1,C18ORF54,MIS18A,RAD18,BPHL,ORC6,NOB1,NCAPD3,KIF6,CKLF,INTS7
TF	Factor: CREB1; motif: TKACGTCAYNN	TF:M09600	0.0013533950208947994	2.8685754256077525	5391	438	156	19917	ZNF367,AURKA,SHCBP1,NCAPH,CEP55,FOXM1,KIF20A,DSN1,SGO1,CKS2,PRC1,KIF2C,ORC1,AURKB,ASPM,FANCD2,CCDC86,CENPK,NDC80,CHAF1A,CHEK1,PCOLCE,CDCA3,MCM10,CCNA2,NTSR2,SKA1,WDR76,PLK1,CEP152,DEPDC1B,SMC4,SKA3,DTL,CDCA2,CDCA5,MASTL,MKI67,TRIP13,HMMR,MGME1,PIM1,RIOK1,SNRPB,RAD51AP1,KIF23,ATAD2,TTK,PBK,EXO1,NCAPD2,PCNA,KIF20B,CENPN,C5ORF34,KNL1,CENPH,SGO2,IGIP,CAV1,ETNPPL,VKORC1,POLR1H,CCND1,CENPE,WDR62,ZWILCH…
TF	Factor: Fli-1; motif: NACCGGAARTN	TF:M11404	0.001366461377923693	2.864402638828006	8828	438	235	19917	DDIAS,AURKA,NRM,MCM8,ASF1B,TP53I3,CENPA,WEE1,PKN3,SHCBP1,CDK2,CEP55,KIF14,TPX2,CKS2,GTSE1,KIFC1,TGFB1I1,PRC1,PIMREG,HJURP,KIF11,MELK,ORC1,AURKB,KIF4A,FANCD2,CENPK,ARHGAP11A,CHAF1A,ERCC6L,CHEK1,CDCA3,CCNB1,MCM10,MYO1C,SKA1,PLK1,DEPDC1B,SMC4,UBE2C,NCAPG,CDCA2,CDCA5,MASTL,MLC1,TRIP13,ESPL1,HMMR,MGME1,PIM1,RIOK1,CEP135,SNRPB,KIF23,KIF18A,POC1A,RAD51,ATAD2,TTK,EXO1,ZDHHC5,NCAPD2,LMNB1,ECT2,RRM2,KIF20B…
TF	Factor: ER71:Pax-5; motif: ACCGGAACYACGCWTSANTG; match class: 1	TF:M08266_1	0.001366461377923693	2.864402638828006	9053	438	240	19917	ZNF367,NRM,HASPIN,ASF1B,CENPA,WEE1,PKN3,CDCA8,FOXM1,KIF14,CCNB2,POLA2,TPX2,CHST1,CKS2,GTSE1,KIFC1,TGFB1I1,PRC1,PIMREG,KIF2C,CHEK2,HJURP,KIF11,ASPM,FANCD2,NDC80,FANCC,RASL10A,ARHGAP11A,TOP2A,CHAF1A,IQGAP3,CDCA3,MCM10,CCNA2,GAS1,MYO1C,SKA1,WDR76,PLK1,CEP152,DEPDC1B,SMC4,DTL,NCAPG,CDCA2,MASTL,MYBL2,TRIP13,PIM1,RIOK1,HMGA1,SNRPB,RAD51AP1,KIF23,KIF18A,RAD51,CKAP2L,ATAD2,CENPM,NCAPD2,ZPR1,LMNB1,KIF20B,…
TF	Factor: ATF-1; motif: TNACGTCAN	TF:M01861	0.001366461377923693	2.864402638828006	6368	438	179	19917	ZNF367,DDIAS,AURKA,NUF2,CENPA,SHCBP1,CDK2,CDK1,NCAPH,CEP55,FOXM1,KIF20A,DSN1,SGO1,CKS2,KIFC1,PRC1,KIF2C,MELK,ORC1,AURKB,ASPM,FANCD2,CCDC86,CENPK,NDC80,FANCC,TOP2A,CHAF1A,CHEK1,PCOLCE,CDCA3,MCM10,CCNA2,NTSR2,SKA1,PLK1,CEP152,SPC24,DEPDC1B,SMC4,DTL,CDCA2,CDCA5,MASTL,MKI67,TRIP13,ESPL1,HMMR,MGME1,PIM1,RIOK1,SNRPB,TTK,PBK,EXO1,NCAPD2,ZPR1,PCNA,KIF20B,CENPN,C5ORF34,KNL1,CENPH,SGO2,IGIP,CAV1,DAP3,POLR1…
TF	Factor: pax-6; motif: NYACGCNTSRNYGCNYN	TF:M11883	0.0013831499123701176	2.8591307464368008	13587	438	336	19917	ZNF367,DDIAS,AURKA,NRM,HASPIN,MCM8,ASF1B,PTTG1,TP53I3,WEE1,PKN3,CDK2,CDK1,NCAPH,CDCA8,FOXM1,KIF14,CCNB2,POLA2,TPX2,CHST1,DSN1,CKS2,GTSE1,KIFC1,TGFB1I1,PIMREG,NUSAP1,KIF2C,CHEK2,HJURP,KIF11,MELK,AURKB,ASPM,KIF4A,SFRP2,FANCD2,CENPK,RASL10A,TOP2A,ERCC6L,CHEK1,IQGAP3,PCOLCE,CDCA3,CCNB1,CCNA2,GAS1,OIP5,MYO1C,FKBP7,SKA1,WDR76,CEP152,DEPDC1B,SKA3,DTL,NCAPG,CDCA2,CDCA5,MASTL,MYBL2,MLC1,MKI67,TRIP13,ESCO2…
TF	Factor: Elk-1; motif: RACCGGAAGTR	TF:M01165	0.0014263421600336	2.8457762806624474	7853	438	213	19917	ZNF367,DDIAS,AURKA,HASPIN,MCM8,ASF1B,NUF2,WEE1,SHCBP1,CDK2,CDK1,CDCA8,CEP55,KIF14,POLA2,TPX2,SGO1,CKS2,GTSE1,KIFC1,PIMREG,KIF2C,CHEK2,AURKB,KIF4A,FANCD2,CENPK,ARHGAP11A,IQGAP3,PCOLCE,CCNA2,MYO1C,FKBP7,ZWINT,DEPDC1B,UBE2C,BUB1,NCAPG,CDCA5,MASTL,TRIP13,MGME1,CENPF,PIM1,RIOK1,SNRPB,KIF23,KIF18A,POC1A,RAD51,PBK,BRIP1,ZDHHC5,NCAPD2,ZPR1,KIF20B,PARPBP,LMNB2,PRIM2,C5ORF34,CDC45,CDC20,KNL1,FANCI,CENPH,SL…
TF	Factor: Elk-1:Pax-5; motif: ACCGGAACYACGCWTSANYG; match class: 1	TF:M08225_1	0.0014296173187662322	2.8447801993111352	8075	438	218	19917	ZNF367,HASPIN,NUF2,WEE1,PKN3,CDCA8,FOXM1,KIF14,CCNB2,POLA2,CHST1,DSN1,SGO1,CKS2,GTSE1,PIMREG,KIF2C,CHEK2,HJURP,KIF11,MELK,ORC1,AURKB,ASPM,KIF4A,FANCD2,NDC80,FANCC,RASL10A,ARHGAP11A,ERCC6L,CHEK1,IQGAP3,MCM10,GAS1,SKA1,DEPDC1B,SMC4,DTL,NCAPG,CDCA2,MASTL,MYBL2,TRIP13,ESPL1,MGME1,SNRPB,RAD51AP1,KIF23,KIF18A,RAD51,CKAP2L,ATAD2,CENPM,NCAPD2,ZPR1,LMNB1,PCNA,CENPN,E2F2,CDC45,CBFB,CDC20,KNL1,CENPH,CDC6,TI…
TF	Factor: ERG; motif: ACCGGAART	TF:M01752	0.001432794223446193	2.8438161780876263	9560	438	251	19917	DDIAS,AURKA,NRM,HASPIN,MCM8,ASF1B,NUF2,TP53I3,CENPA,WEE1,PKN3,SHCBP1,CDK2,CEP55,KIF14,CCNB2,TPX2,CHST1,SGO1,CKS2,GTSE1,KIFC1,TGFB1I1,PRC1,PIMREG,HJURP,KIF11,MELK,ORC1,AURKB,KIF4A,FANCD2,CENPK,FANCC,ARHGAP11A,CHAF1A,ERCC6L,CDC25C,CDCA3,CCNB1,MCM10,MYO1C,FKBP7,SKA1,PLK1,DEPDC1B,SMC4,UBE2C,NCAPG,CDCA2,CDCA5,MASTL,TRIP13,ESPL1,HMMR,MGME1,RIOK1,CEP135,SNRPB,KIF23,KIF18A,POC1A,RAD51,ATAD2,TTK,ZDHHC5,NC…
TF	Factor: ATF-1; motif: NNRTGACGYMA; match class: 1	TF:M09866_1	0.0014360306504415962	2.842836290472831	969	438	41	19917	ZNF367,DSN1,CKS2,PRC1,FANCD2,CCDC86,NDC80,CHEK1,MCM10,DTL,MASTL,MGME1,TTK,PBK,EXO1,CENPN,POLR1H,CENPE,WDR62,PPM1D,MCM2,CENPW,DEPDC1,MLXIP,DAAM2,NIP7,RFC3,MCAM,KIF15,DGCR6,C11ORF24,UBE2T,N4BP1,XRCC2,PINX1,H2BC15,CCDC77,CBX8,INTS7,ISG20L2,WDR53
TF	Factor: E2F-1; motif: TTTGGCGCCAAA; match class: 1	TF:M04516_1	0.0014753259680186615	2.8311120132645535	10299	438	267	19917	ZNF367,DDIAS,AURKA,TP53I3,CENPA,WEE1,PKN3,SHCBP1,CDK1,NCAPH,CDCA8,CEP55,FOXM1,KIF14,CCNB2,POLA2,CHST1,DSN1,CKS2,GTSE1,KIFC1,TGFB1I1,PRC1,NUSAP1,KIF2C,CHEK2,HJURP,KIF11,MELK,ASPM,NDC80,FANCC,RASL10A,TOP2A,CHAF1A,ERCC6L,IQGAP3,MCM10,CCNA2,GAS1,OIP5,MYO1C,CEP152,SPC24,ZWINT,DEPDC1B,SMC4,SKA3,DTL,BUB1,CDCA5,MASTL,MYBL2,MKI67,TRIP13,HMMR,MGME1,PIM1,RIOK1,CEP135,HMGA1,KIF18A,POC1A,ATAD2,TTK,PBK,EXO1,ZD…
TF	Factor: E2F-4; motif: TTTTGGCGCCAWWN	TF:M11535	0.0016832261155623725	2.773857539315421	10966	438	281	19917	ZNF367,DDIAS,AURKA,NRM,MCM8,CENPA,WEE1,PKN3,SHCBP1,CDK1,NCAPH,CDCA8,CEP55,FOXM1,KIF14,CCNB2,POLA2,KIF20A,TPX2,DSN1,CKS2,KIFC1,TGFB1I1,PRC1,PIMREG,NUSAP1,BIRC5,CHEK2,HJURP,KIF11,MELK,ORC1,ASPM,KIF4A,FANCD2,CENPK,NDC80,FANCC,RASL10A,CHAF1A,CHEK1,IQGAP3,PCOLCE,CDC25C,CDCA3,MCM10,CCNA2,OIP5,MYO1C,WDR76,CEP152,SPC24,ZWINT,DEPDC1B,SMC4,SKA3,DTL,BUB1,CDCA5,MASTL,MYBL2,MKI67,TRIP13,ESCO2,ESPL1,HMMR,MGME1…
TF	Factor: meis1:Elf-1; motif: NTGCCGGAAGTN; match class: 1	TF:M08377_1	0.0017109815628449227	2.7667546702939982	5084	438	148	19917	ZNF367,DDIAS,AURKA,MCM8,ASF1B,NUF2,CENPA,WEE1,CDCA8,CEP55,FOXM1,CCNB2,POLA2,DSN1,SGO1,CKS2,GTSE1,KIFC1,TGFB1I1,PIMREG,HJURP,MELK,ORC1,NDC80,FANCC,ARHGAP11A,ERCC6L,CHEK1,GAS1,FKBP7,UBE2C,DTL,MASTL,TRIP13,PIM1,SNRPB,KIF23,RAD51,ATAD2,ZDHHC5,NCAPD2,ZPR1,RRM2,KIF20B,CDC20,KNL1,FANCI,SLC26A2,SGO2,DAP3,POLR1H,MLX,CCND1,SF3B3,IKBIP,BUB1B,ZWILCH,NKIRAS2,DSCC1,REXO5,TONSL,CKS1B,POLQ,CDKN3,RFC2,RACGAP1,KNS…
TF	Factor: E2F2; motif: NNTTTTGGCGCCAAAAWN; match class: 1	TF:M03959_1	0.0017870229443509287	2.7478698713661918	2989	438	96	19917	HASPIN,CDCA8,POLA2,KIF20A,KIFC1,NDC80,CHEK1,TROAP,MCM10,MYO1C,WDR76,SMC4,DTL,HMMR,PIM1,RAD51AP1,KIF18A,POC1A,RAD51,ATAD2,TTK,ECT2,RRM2,E2F2,PRIM2,C5ORF34,CBFB,KNL1,CENPH,CENPL,CDC6,SGO2,IGIP,KPNA2,SF3B3,IKBIP,BUB1B,KLF10,BORA,MCM2,MND1,FAM111B,NR2C2AP,MCM5,TRAIP,C18ORF54,DAXX,EGLN3,NSMCE2,RFC3,PMM2,SLC1A4,EME1,E2F7,CKAP2,CDC25A,BLOC1S5,KDM4D,ORAI1,DDX19B,CFAP221,DNMT1,GINS1,CLSPN,KIF15,E2F1,FBXO5…
TF	Factor: E2F-3:Prrxl1; motif: SGCGCTAATTNN; match class: 1	TF:M08206_1	0.0018617843740319025	2.730070619053244	5093	438	148	19917	AURKA,ASF1B,NUF2,SHCBP1,CDK2,CDK1,FOXM1,KIF14,POLA2,KIF20A,TPX2,SGO1,GTSE1,CHEK2,HJURP,ORC1,ASPM,CCDC86,NDC80,CHAF1A,CHEK1,CDC25C,CDCA3,GAS1,WDR76,CEP152,SPC24,ZWINT,DEPDC1B,SMC4,SKA3,NCAPG,CDCA2,MASTL,HMMR,CENPF,CEP135,RAD51AP1,KIF23,RAD51,TTK,PBK,EXO1,NCAPD2,PCNA,ECT2,RRM2,CENPN,E2F2,PRIM2,CDC20,KNL1,FANCI,CENPH,CENPL,TK1,CDC6,TIMELESS,VKORC1,KPNA2,SF3B3,KLF10,WDR62,ZWILCH,BORA,RFWD3,HPSE2,JPT1…
TF	Factor: BTEB2; motif: NCCACRCCCN	TF:M12165	0.0019387076085466157	2.712487685284367	4931	438	144	19917	PTTG1,WEE1,PKN3,CEP55,FOXM1,KIF14,CHST1,CKS2,GTSE1,PRC1,NUSAP1,BIRC5,HJURP,KIF11,MELK,RASL10A,ERCC6L,PCOLCE,CDCA3,NTSR2,ZWINT,SKA3,DTL,MASTL,MYBL2,MKI67,ESPL1,KIF23,POC1A,RAD51,CKAP2L,ZDHHC5,CENPM,LMNB1,PCNA,ALDOC,LMNB2,CENPH,TK1,CDC6,VKORC1,SF3B3,CENPE,IKBIP,ALDH2,BUB1B,KLF10,REXO5,RFWD3,CKS1B,HMGB2,CDCA4,NR2C2AP,MCM5,RFC2,C18ORF54,RNASEH2A,MIS18A,KNSTRN,DAAM2,ITGA5,WDHD1,NIP7,CNIH4,HAUS8,KBTBD1…
TF	Factor: Elk-1:OC-2; motif: RCCGGAASCGATCGATNN	TF:M08223	0.0021527082830449375	2.6670148181317046	12856	438	320	19917	ZNF367,DDIAS,AURKA,NRM,MCM8,ASF1B,NUF2,PTTG1,TP53I3,CENPA,WEE1,PKN3,CDK2,NCAPH,CDCA8,CEP55,CCNB2,POLA2,KIF20A,TPX2,SGO1,CKS2,GTSE1,KIFC1,TGFB1I1,PRC1,PIMREG,KIF2C,HJURP,ORC1,AURKB,ASPM,KIF4A,SFRP2,CCDC86,CENPK,NDC80,FANCC,RASL10A,ARHGAP11A,TOP2A,CHAF1A,ERCC6L,CHEK1,IQGAP3,PCOLCE,TROAP,CCNB1,MCM10,CCNA2,GAS1,NTSR2,FKBP7,SKA1,WDR76,PLK1,SPC24,ZWINT,DEPDC1B,SMC4,SKA3,DTL,BUB1,NCAPG,CDCA2,CDCA5,MASTL…
TF	Factor: Net; motif: NRCCGGAAGTN	TF:M11439	0.002162164739681276	2.6651112193517834	2580	438	85	19917	DDIAS,AURKA,NRM,KIF14,TPX2,CKS2,GTSE1,KIFC1,TGFB1I1,AURKB,KIF4A,FANCD2,ARHGAP11A,MYO1C,UBE2C,NCAPG,MASTL,RIOK1,SNRPB,KIF23,ZDHHC5,NCAPD2,LMNB2,C5ORF34,CDC45,ETNPPL,SF3B3,NKIRAS2,REXO5,RFWD3,CKS1B,POLQ,ARHGEF39,TRAIP,RACGAP1,RNASEH2A,KNSTRN,DAXX,RAD18,DEK,EDEM2,RTKN2,DLGAP5,BFAR,ABT1,SIDT1,CD93,MAD2L1,UFD1,PMM2,PFN1,EME1,ZSCAN16,USB1,SERPINH1,ORAI1,DDX19B,DYNLRB2,DNMT1,PAK1IP1,BRCA2,DPP9,CORO1C,C1…
TF	Factor: NF-Y; motif: RGCCAATCRGN	TF:M07302	0.0021718203777655928	2.6631760962890096	1614	438	59	19917	DDIAS,AURKA,ASF1B,CDK1,NCAPH,CEP55,KIF14,KIF20A,TPX2,CKS2,TGFB1I1,PIMREG,CHEK2,MELK,ARHGAP11A,TOP2A,PLK1,DTL,BUB1,CDCA2,CDCA5,ESCO2,CENPF,KIF23,POC1A,ATAD2,ZDHHC5,CENPM,NCAPD2,PON1,TK1,CDC6,SGO2,KPNA2,TACC3,CKS1B,HMGB2,CDCA4,TCF19,MCM5,CDKN3,MLXIP,DAXX,DEK,UBALD2,SLC1A4,ORC6,CKAP2,MTFR2,FAAP24,UBE2T,GABRG1,ZNF90,PRR11,TMEM45A,INCENP,INTS7,STIP1,NUP93
TF	Factor: Foxn2; motif: NNGCGTCNNNNNGACGCNN	TF:M11541	0.00219623978736611	2.658320244984802	5784	438	164	19917	PTTG1,PKN3,CEP55,FOXM1,CCNB2,DSN1,PRC1,PIMREG,NUSAP1,BIRC5,KIF11,KIF4A,FANCD2,NDC80,CHEK1,CDC25C,CDCA3,MCM10,CCNA2,OIP5,FKBP7,CEP152,DEPDC1B,SMC4,CDCA2,CDCA5,MKI67,ESCO2,MGME1,CENPF,RIOK1,CEP135,HMGA1,RAD51AP1,KIF23,RAD51,TTK,PBK,EXO1,ZDHHC5,NCAPD2,LMNB1,PCNA,KIF20B,ALDOC,E2F2,LMNB2,CBFB,CDC20,FANCI,SLC26A2,ETNPPL,VKORC1,DAP3,POLR1H,MLX,CCND1,IKBIP,KLF10,BORA,RFWD3,TACC3,NEK2,CKS1B,HMGB2,MND1,NR2…
TF	Factor: Kaiso; motif: TCTCGCGAG	TF:M04691	0.0022035561705687702	2.6568758744678176	15263	438	368	19917	ZNF367,DDIAS,AURKA,NRM,HASPIN,MCM8,ASF1B,NUF2,TP53I3,CENPA,WEE1,PKN3,SHCBP1,CDK1,NCAPH,CDCA8,CEP55,FOXM1,KIF14,CCNB2,POLA2,KIF20A,TPX2,DSN1,SGO1,CKS2,GTSE1,KIFC1,PRC1,PIMREG,NUSAP1,KIF2C,BIRC5,CHEK2,HJURP,KIF11,MELK,ORC1,ASPM,SFRP2,FANCD2,CCDC86,CENPK,NDC80,FANCC,RASL10A,ARHGAP11A,TOP2A,CHAF1A,ERCC6L,IQGAP3,PCOLCE,CDC25C,CDCA3,CCNB1,MCM10,CCNA2,GAS1,OIP5,NTSR2,MYO1C,FKBP7,SKA1,WDR76,CEP152,SPC24,…
TF	Factor: FLI1; motif: ACCGGAARTN	TF:M03988	0.00228109053672565	2.6418574771871612	8401	438	224	19917	DDIAS,AURKA,NRM,MCM8,ASF1B,TP53I3,CENPA,WEE1,PKN3,SHCBP1,CDK2,CEP55,KIF14,TPX2,CKS2,GTSE1,KIFC1,TGFB1I1,PRC1,PIMREG,HJURP,KIF11,MELK,ORC1,AURKB,KIF4A,FANCD2,CENPK,ARHGAP11A,CHAF1A,ERCC6L,CDCA3,CCNB1,MCM10,MYO1C,SKA1,PLK1,DEPDC1B,SMC4,UBE2C,NCAPG,CDCA2,CDCA5,MASTL,TRIP13,ESPL1,HMMR,MGME1,RIOK1,CEP135,SNRPB,KIF23,KIF18A,POC1A,RAD51,ATAD2,TTK,EXO1,ZDHHC5,NCAPD2,LMNB1,ECT2,KIF20B,PARPBP,E2F2,LMNB2,PR…
TF	Factor: CREB; motif: NNTKACGTCANNNS	TF:M00916	0.00228109053672565	2.6418574771871612	5959	438	168	19917	ZNF367,DDIAS,AURKA,NUF2,CENPA,SHCBP1,CDK2,CDK1,NCAPH,CEP55,KIF20A,DSN1,SGO1,CKS2,KIFC1,PRC1,KIF2C,MELK,ORC1,AURKB,ASPM,FANCD2,CCDC86,CENPK,NDC80,FANCC,TOP2A,CHAF1A,CHEK1,PCOLCE,MCM10,CCNA2,NTSR2,SKA1,CEP152,SPC24,DEPDC1B,SMC4,DTL,CDCA2,CDCA5,MASTL,TRIP13,ESPL1,MGME1,PIM1,RIOK1,SNRPB,KIF23,TTK,PBK,EXO1,NCAPD2,CENPN,C5ORF34,KNL1,CENPH,SGO2,IGIP,CAV1,ETNPPL,DAP3,POLR1H,CCND1,CENPE,IKBIP,WDR62,ZWILCH…
TF	Factor: pax-6; motif: NYACGCNTSRNYGCNYN; match class: 1	TF:M11883_1	0.002290200837919295	2.64012643077124	7825	438	211	19917	ZNF367,AURKA,NRM,HASPIN,MCM8,ASF1B,WEE1,NCAPH,FOXM1,KIF14,POLA2,DSN1,GTSE1,PIMREG,KIF2C,CHEK2,KIF11,MELK,AURKB,SFRP2,CENPK,RASL10A,ERCC6L,CHEK1,IQGAP3,PCOLCE,CDCA3,CCNA2,GAS1,MYO1C,FKBP7,WDR76,DEPDC1B,SKA3,CDCA2,MASTL,MYBL2,MLC1,MKI67,TRIP13,ESCO2,ESPL1,HMMR,MGME1,CENPF,HMGA1,RAD51,CKAP2L,EXO1,ZDHHC5,CENPM,NCAPD2,LMNB1,PCNA,ECT2,RRM2,KIF20B,CENPN,PRIM2,CBFB,CDC20,KNL1,GEMIN6,TK1,CDC6,VKORC1,DAP3,…
TF	Factor: etv3; motif: ACCGGAAGYN	TF:M02068	0.002290200837919295	2.64012643077124	3485	438	108	19917	DDIAS,AURKA,MCM8,ASF1B,CDK2,KIF14,TPX2,CKS2,KIFC1,ORC1,AURKB,KIF4A,FANCD2,ARHGAP11A,CDC25C,CCNA2,MYO1C,FKBP7,NCAPG,CDCA5,MASTL,RIOK1,SNRPB,KIF23,ZDHHC5,NCAPD2,KIF20B,LMNB2,PRIM2,C5ORF34,CDC45,FANCI,SLC26A2,ETNPPL,SF3B3,NKIRAS2,REXO5,RFWD3,CKS1B,POLQ,ARHGEF39,MND1,FBLIM1,RFC2,TRAIP,RNASEH2A,KNSTRN,DAXX,RAD18,DEK,NIP7,EDEM2,RTKN2,DLGAP5,KBTBD11,BFAR,ABT1,CD93,MAD2L1,UFD1,PMM2,PFN1,EME1,ZSCAN16,USB1…
TF	Factor: MAZ; motif: GGGMGGGGSSGGGGGGGGGGGG	TF:M09636	0.0022997631310945226	2.6383168927459293	16380	438	389	19917	ZNF367,DDIAS,AURKA,NRM,HASPIN,MCM8,ASF1B,NUF2,PTTG1,TP53I3,CENPA,WEE1,PKN3,SHCBP1,CDK2,CDK1,NCAPH,CDCA8,CEP55,FOXM1,KIF14,CCNB2,POLA2,TPX2,CHST1,DSN1,SGO1,CKS2,GTSE1,KIFC1,TGFB1I1,PRC1,PIMREG,NUSAP1,KIF2C,BIRC5,CHEK2,HJURP,KIF11,MELK,ORC1,AURKB,KIF4A,SFRP2,CCDC86,CENPK,NDC80,FANCC,RASL10A,ARHGAP11A,TOP2A,CHAF1A,ERCC6L,CHEK1,IQGAP3,PCOLCE,TROAP,CDC25C,CDCA3,CCNB1,MCM10,CCNA2,GAS1,OIP5,NTSR2,MYO1C,…
TF	Factor: c-Ets-2; motif: NACCGGAAGYRCTTCCGGTN	TF:M11417	0.002392305935583565	2.621183282192101	14456	438	352	19917	ZNF367,AURKA,HASPIN,MCM8,ASF1B,NUF2,CENPA,WEE1,PKN3,CDK2,CDK1,CDCA8,CEP55,FOXM1,KIF14,POLA2,TPX2,CHST1,DSN1,SGO1,CKS2,GTSE1,KIFC1,TGFB1I1,PRC1,PIMREG,KIF2C,BIRC5,CHEK2,HJURP,KIF11,MELK,ORC1,ASPM,KIF4A,FANCC,ARHGAP11A,TOP2A,CHAF1A,ERCC6L,CHEK1,IQGAP3,PCOLCE,CDCA3,CCNB1,MCM10,CCNA2,GAS1,NTSR2,MYO1C,FKBP7,SKA1,WDR76,PLK1,CEP152,SPC24,DEPDC1B,SMC4,UBE2C,SKA3,DTL,BUB1,NCAPG,CDCA2,CDCA5,MASTL,MYBL2,MLC…
TF	Factor: TEL1; motif: CNCGGAANNN; match class: 1	TF:M02070_1	0.0024691179147847578	2.607458169477726	4876	438	142	19917	HASPIN,MCM8,ASF1B,WEE1,PKN3,FOXM1,CHST1,SGO1,CKS2,KIFC1,NUSAP1,FANCD2,FANCC,ARHGAP11A,OIP5,MYO1C,DEPDC1B,DTL,CDCA5,MASTL,MYBL2,TRIP13,MGME1,RIOK1,SNRPB,KIF23,POC1A,EXO1,ZDHHC5,ZPR1,RRM2,PARPBP,E2F2,PRIM2,C5ORF34,CBFB,FANCI,SLC26A2,ZYX,ETNPPL,MLX,SF3B3,BORA,RPIA,REXO5,RFWD3,TONSL,CKS1B,HMGB2,POLQ,ARHGEF39,MCM5,RFC2,NDP,TRAIP,RACGAP1,WDR12,KNSTRN,DAXX,DIAPH1,ITGA5,COL4A1,DEK,WDHD1,TRIM26,NIP7,EDEM2…
TF	Factor: pax-2; motif: NCGTCACGCNYSRNYGCNYN	TF:M11877	0.0025043015550745926	2.601313376811615	11632	438	294	19917	AURKA,NRM,HASPIN,MCM8,ASF1B,NUF2,CENPA,WEE1,PKN3,SHCBP1,NCAPH,CDCA8,CEP55,FOXM1,KIF14,POLA2,TPX2,CHST1,DSN1,SGO1,CKS2,GTSE1,KIFC1,PRC1,PIMREG,NUSAP1,BIRC5,CHEK2,HJURP,KIF11,MELK,AURKB,KIF4A,SFRP2,CCDC86,FANCC,RASL10A,TOP2A,CHEK1,IQGAP3,TROAP,CDCA3,CCNA2,GAS1,OIP5,NTSR2,MYO1C,FKBP7,WDR76,CEP152,SPC24,DEPDC1B,SMC4,UBE2C,SKA3,DTL,NCAPG,CDCA5,MASTL,MKI67,TRIP13,ESCO2,ESPL1,HMMR,CENPF,HMGA1,KIF18A,POC…
TF	Factor: Elf-1; motif: AWCCCGGAAGTN	TF:M07415	0.002526597587424831	2.597463922891169	8060	438	216	19917	ZNF367,DDIAS,AURKA,NRM,MCM8,ASF1B,CENPA,WEE1,PKN3,SHCBP1,CDK2,CEP55,KIF14,TPX2,CKS2,GTSE1,KIFC1,TGFB1I1,PIMREG,CHEK2,HJURP,MELK,ORC1,AURKB,ASPM,KIF4A,FANCD2,NDC80,ARHGAP11A,ERCC6L,TROAP,CDCA3,CCNB1,CCNA2,MYO1C,SKA1,PLK1,DEPDC1B,SMC4,UBE2C,BUB1,NCAPG,CDCA2,CDCA5,MASTL,TRIP13,ESPL1,HMMR,MGME1,CENPF,RIOK1,CEP135,SNRPB,KIF23,POC1A,RAD51,ATAD2,TTK,ZDHHC5,NCAPD2,RRM2,KIF20B,PARPBP,E2F2,LMNB2,PRIM2,C5OR…
TF	Factor: CHD2; motif: TCTCGCGAG; match class: 1	TF:M04710_1	0.002578811155869854	2.5885804597102573	11589	438	293	19917	ZNF367,DDIAS,AURKA,NRM,HASPIN,CENPA,WEE1,PKN3,NCAPH,CDCA8,FOXM1,KIF14,POLA2,DSN1,SGO1,CKS2,GTSE1,KIFC1,PRC1,PIMREG,NUSAP1,KIF2C,BIRC5,HJURP,KIF11,MELK,SFRP2,FANCD2,CCDC86,CENPK,NDC80,FANCC,RASL10A,TOP2A,CHAF1A,PCOLCE,CDCA3,CCNB1,CCNA2,GAS1,OIP5,NTSR2,MYO1C,FKBP7,WDR76,PLK1,SMC4,UBE2C,SKA3,NCAPG,CDCA5,MASTL,MYBL2,MKI67,TRIP13,ESCO2,ESPL1,HMMR,MGME1,PIM1,RIOK1,HMGA1,SNRPB,KIF23,KIF18A,POC1A,RAD51,C…
TF	Factor: ATF-1; motif: NRTGACGTMAN	TF:M09592	0.0026126742205678055	2.5829147399207124	4470	438	132	19917	ZNF367,AURKA,NCAPH,FOXM1,KIF20A,DSN1,SGO1,CKS2,PRC1,ORC1,AURKB,ASPM,FANCD2,CCDC86,CENPK,NDC80,CHAF1A,CHEK1,IQGAP3,PCOLCE,CDC25C,CDCA3,MCM10,CCNA2,NTSR2,SKA1,WDR76,PLK1,CEP152,SKA3,DTL,CDCA5,MASTL,MYBL2,MKI67,HMMR,MGME1,RIOK1,SNRPB,RAD51AP1,KIF23,KIF18A,ATAD2,TTK,PBK,EXO1,NCAPD2,ZPR1,PCNA,ECT2,KIF20B,CENPN,C5ORF34,KNL1,SGO2,ETNPPL,VKORC1,POLR1H,CCND1,CENPE,WDR62,ZWILCH,PPM1D,SREBF1,MCM2,CENPW,MCM3…
TF	Factor: USF2; motif: AAGTCACG	TF:M04810	0.002658158929300737	2.575419056480235	5555	438	158	19917	DDIAS,NRM,ASF1B,NUF2,CDK1,POLA2,KIF20A,SGO1,CKS2,KIFC1,PRC1,PIMREG,KIF2C,HJURP,KIF11,MELK,ORC1,KIF4A,CENPK,RASL10A,TOP2A,CHAF1A,PCOLCE,CDCA3,MCM10,CCNA2,CEP152,UBE2C,BUB1,CDCA5,MYBL2,MKI67,ESCO2,ESPL1,HMMR,CENPF,PIM1,HMGA1,SNRPB,RAD51AP1,POC1A,RAD51,CKAP2L,PBK,ZDHHC5,CENPM,NCAPD2,ZPR1,PCNA,ECT2,PRIM2,CDC45,CBFB,CDC20,KNL1,PON1,CENPH,CENPL,FRMD8,GEMIN6,TK1,SGO2,TIMELESS,VKORC1,CENPE,IKBIP,ALDH2,BU…
TF	Factor: CREB1; motif: NRRTGACGTMA	TF:M09887	0.002983387393264494	2.525290349777914	5483	438	156	19917	ZNF367,AURKA,CENPA,SHCBP1,NCAPH,CEP55,POLA2,KIF20A,DSN1,SGO1,CKS2,PRC1,KIF2C,ORC1,AURKB,ASPM,FANCD2,CCDC86,CENPK,NDC80,TOP2A,CHAF1A,CHEK1,PCOLCE,CDCA3,MCM10,CCNA2,SKA1,WDR76,CEP152,DEPDC1B,SMC4,DTL,CDCA2,CDCA5,MASTL,MKI67,TRIP13,ESCO2,HMMR,MGME1,PIM1,RIOK1,SNRPB,KIF23,ATAD2,TTK,PBK,EXO1,NCAPD2,PCNA,KIF20B,CENPN,C5ORF34,CDC45,KNL1,CENPH,SGO2,IGIP,CAV1,VKORC1,KPNA2,POLR1H,CCND1,CENPE,KLF10,WDR62,ZW…
TF	Factor: Foxn2; motif: NNGCGTCNNNNNGACGCNN; match class: 1	TF:M11541_1	0.0029963148987786465	2.5234125462411576	5526	438	157	19917	PTTG1,PKN3,CEP55,FOXM1,CCNB2,DSN1,PRC1,PIMREG,NUSAP1,BIRC5,KIF11,KIF4A,FANCD2,NDC80,CHEK1,CDC25C,CDCA3,CCNA2,OIP5,FKBP7,DEPDC1B,SMC4,CDCA2,CDCA5,MKI67,ESCO2,MGME1,CENPF,RIOK1,CEP135,HMGA1,RAD51AP1,KIF23,RAD51,TTK,PBK,EXO1,ZDHHC5,NCAPD2,LMNB1,PCNA,KIF20B,ALDOC,LMNB2,CBFB,CDC20,FANCI,SLC26A2,ETNPPL,VKORC1,DAP3,POLR1H,MLX,CCND1,IKBIP,KLF10,BORA,RFWD3,TACC3,NEK2,CKS1B,HMGB2,MND1,NR2C2AP,MCM5,CDKN3,TR…
TF	Factor: SAP-1; motif: NRCCGGAWGYN	TF:M11437	0.0030107146918645403	2.521330398130449	2803	438	90	19917	DDIAS,AURKA,NRM,MCM8,KIF14,TPX2,CKS2,GTSE1,KIFC1,TGFB1I1,AURKB,KIF4A,FANCD2,ARHGAP11A,MYO1C,UBE2C,NCAPG,MASTL,RIOK1,SNRPB,KIF23,ZDHHC5,NCAPD2,LMNB2,C5ORF34,CDC45,ETNPPL,SF3B3,NKIRAS2,REXO5,RFWD3,CKS1B,POLQ,ARHGEF39,TRAIP,RACGAP1,RNASEH2A,KNSTRN,DAXX,RAD18,DEK,EDEM2,RTKN2,DLGAP5,BFAR,ABT1,SIDT1,CD93,MAD2L1,UFD1,PMM2,PFN1,EME1,ZSCAN16,USB1,SERPINH1,ORAI1,DDX19B,DYNLRB2,SSH2,DNMT1,PAK1IP1,TRMT6,BRCA…
TF	Factor: CREB1; motif: NNNNACGTCANN; match class: 1	TF:M03544_1	0.003068443038014231	2.5130819344643625	1213	438	47	19917	ZNF367,AURKA,DSN1,SGO1,CKS2,PRC1,FANCD2,CCDC86,NDC80,CHAF1A,CHEK1,MCM10,CCNA2,DTL,MASTL,MGME1,TTK,PBK,EXO1,CENPN,POLR1H,CENPE,WDR62,ZWILCH,PPM1D,MCM2,CENPW,MLXIP,DAAM2,TRIM26,NIP7,RFC3,MCAM,KIF15,C11ORF24,UBE2T,N4BP1,XRCC2,PINX1,FSTL5,H2BC15,CCDC77,CBX8,INTS7,CDKN2C,ISG20L2,WDR53
TF	Factor: ETV3; motif: ACCGGAAGTN	TF:M03981	0.0031485110457817114	2.5018947787431696	2346	438	78	19917	DDIAS,AURKA,KIF14,TPX2,GTSE1,KIFC1,FANCD2,MYO1C,DEPDC1B,UBE2C,NCAPG,CDCA5,MASTL,RIOK1,SNRPB,KIF23,ZDHHC5,NCAPD2,LMNB2,C5ORF34,CDC45,FANCI,ETNPPL,SF3B3,NKIRAS2,REXO5,RFWD3,CKS1B,POLQ,ARHGEF39,TRAIP,RACGAP1,KNSTRN,DAXX,RAD18,DEK,NIP7,EDEM2,RTKN2,DLGAP5,BFAR,SIDT1,CD93,MAD2L1,UFD1,PMM2,PFN1,EME1,ZSCAN16,CFAP20,SERPINH1,ORAI1,DNMT1,PAK1IP1,BRCA2,DPP9,CORO1C,C11ORF24,KMT5A,TBC1D31,NCAPD3,ACVR1,CDC25B,…
TF	Factor: ZNF76; motif: RNNGCMTKCTGGGARNTGTAGT	TF:M10169	0.0033290709418605	2.4776769500129707	1393	438	52	19917	HASPIN,PTTG1,CDCA8,KIF20A,GTSE1,BIRC5,CHEK2,IQGAP3,CDC25C,CDCA3,ESCO2,ESPL1,POC1A,RAD51,PBK,EXO1,PCNA,ECT2,LMNB2,CDC45,FANCI,CDC6,VKORC1,BUB1B,RPIA,TACC3,HMGB2,MCM3,RNASEH2A,WDR12,ITGA5,CNIH4,UFD1,PMM2,BRCA1,CNOT1,CDC25A,TEAD4,FAM72D,CENPP,TBC1D31,HAUS1,FEN1,SLC22A6,SMARCAL1,DESI2,PRPF4,UTP4,H2BC15,PRIM1,EIF5A,CLP1
TF	Factor: TEF-3:Elk-1; motif: RMATWCCGGAWGT	TF:M08418	0.003373320076353281	2.471942448968233	11862	438	298	19917	DDIAS,AURKA,NRM,HASPIN,MCM8,ASF1B,CENPA,PKN3,SHCBP1,CDK2,NCAPH,CEP55,KIF14,POLA2,KIF20A,TPX2,DSN1,SGO1,GTSE1,TGFB1I1,PIMREG,NUSAP1,KIF2C,CHEK2,HJURP,KIF11,ORC1,ASPM,SFRP2,FANCD2,CCDC86,CENPK,NDC80,FANCC,RASL10A,ARHGAP11A,TOP2A,ERCC6L,CHEK1,PCOLCE,CDCA3,CCNB1,MCM10,CCNA2,GAS1,OIP5,NTSR2,MYO1C,SKA1,WDR76,PLK1,CEP152,SMC4,UBE2C,DTL,NCAPG,CDCA2,MASTL,MYBL2,MKI67,ESPL1,HMMR,MGME1,CENPF,RIOK1,CEP135,SN…
TF	Factor: NF-Y; motif: NCTGATTGGYTASY	TF:M00209	0.003373320076353281	2.471942448968233	3845	438	116	19917	ZNF367,DDIAS,AURKA,MCM8,ASF1B,CDK1,NCAPH,CDCA8,CEP55,KIF14,KIF20A,TPX2,CKS2,TGFB1I1,PIMREG,CHEK2,HJURP,MELK,ARHGAP11A,TOP2A,MCM10,GAS1,PLK1,ZWINT,DEPDC1B,UBE2C,DTL,BUB1,NCAPG,CDCA2,CDCA5,ESCO2,ESPL1,CENPF,HMGA1,KIF23,KIF18A,POC1A,CKAP2L,ATAD2,TTK,ZDHHC5,CENPM,NCAPD2,ECT2,ALDOC,PARPBP,CDC45,TK1,CDC6,IGIP,KLF10,GJC1,TACC3,HMGB2,POLQ,CDCA4,MCM3,MCM5,CDKN3,NDP,KNTC1,RACGAP1,PAQR6,DAXX,RAD18,DEK,DLGAP…
TF	Factor: ETV5; motif: NCCGGAWGYN	TF:M03983	0.0034843719992596897	2.4578754849498665	3169	438	99	19917	DDIAS,AURKA,MCM8,ASF1B,CDK2,KIF14,TPX2,CKS2,GTSE1,KIFC1,AURKB,KIF4A,FANCD2,ARHGAP11A,CHEK1,MYO1C,UBE2C,NCAPG,CDCA5,MASTL,MLC1,RIOK1,SNRPB,KIF23,ZDHHC5,NCAPD2,KIF20B,LMNB2,PRIM2,C5ORF34,CDC45,FANCI,SLC26A2,ETNPPL,SF3B3,NKIRAS2,REXO5,RFWD3,CKS1B,POLQ,ARHGEF39,RFC2,TRAIP,RACGAP1,RNASEH2A,KNSTRN,DAXX,RAD18,DEK,EDEM2,RTKN2,DLGAP5,BFAR,ABT1,SIDT1,CD93,MAD2L1,UFD1,PMM2,PFN1,EME1,ZSCAN16,USB1,SERPINH1,OR…
TF	Factor: ATF-2; motif: NNTGACGTCAN; match class: 1	TF:M07312_1	0.0035646457661294368	2.447983621340584	1084	438	43	19917	ZNF367,AURKA,DSN1,SGO1,CKS2,PRC1,FANCD2,CCDC86,NDC80,CHAF1A,CHEK1,MCM10,CCNA2,DTL,MASTL,MGME1,TTK,PBK,EXO1,CENPN,POLR1H,CENPE,WDR62,ZWILCH,PPM1D,MCM2,CENPW,MLXIP,DAAM2,TRIM26,RFC3,MCAM,KIF15,C11ORF24,N4BP1,XRCC2,PINX1,FSTL5,H2BC15,CCDC77,CBX8,INTS7,CDKN2C
TF	Factor: E2F-3:FOXI1; motif: NGACACCGCGCCCAC	TF:M08208	0.0037462051086313637	2.4264084482346195	12690	438	315	19917	DDIAS,AURKA,NRM,MCM8,ASF1B,PTTG1,CENPA,WEE1,PKN3,SHCBP1,CDK1,NCAPH,CDCA8,CEP55,FOXM1,KIF14,KIF20A,TPX2,CHST1,DSN1,CKS2,GTSE1,KIFC1,TGFB1I1,PRC1,PIMREG,NUSAP1,KIF2C,BIRC5,CHEK2,KIF11,MELK,AURKB,ASPM,KIF4A,SFRP2,FANCD2,FANCC,RASL10A,CHAF1A,ERCC6L,CHEK1,IQGAP3,PCOLCE,CDC25C,MCM10,GAS1,OIP5,NTSR2,MYO1C,SKA1,WDR76,PLK1,SPC24,ZWINT,SMC4,SKA3,DTL,CDCA2,CDCA5,MASTL,MYBL2,MKI67,TRIP13,ESCO2,ESPL1,HMMR,MGM…
TF	Factor: E2F-4; motif: TTTTGGCGCCAWWN; match class: 1	TF:M11535_1	0.0037524377533412925	2.4256865032431496	6579	438	181	19917	ZNF367,AURKA,WEE1,PKN3,SHCBP1,CDCA8,CEP55,POLA2,DSN1,CKS2,PRC1,PIMREG,NUSAP1,CHEK2,HJURP,KIF11,MELK,ORC1,CENPK,NDC80,RASL10A,CHAF1A,IQGAP3,PCOLCE,CCNA2,OIP5,MYO1C,WDR76,SPC24,ZWINT,DEPDC1B,SMC4,SKA3,DTL,CDCA5,MASTL,MKI67,ESPL1,HMMR,MGME1,PIM1,RIOK1,KIF18A,POC1A,RAD51,ATAD2,EXO1,ZDHHC5,CENPM,LMNB1,PCNA,ECT2,RRM2,CENPN,E2F2,CBFB,CDC20,CENPL,SLC26A2,CDC6,TIMELESS,DAP3,KPNA2,MLX,SF3B3,IKBIP,KLF10,WDR…
TF	Factor: E2F-3:Prrxl1; motif: SGCGCTAATTNN	TF:M08206	0.003917968186339274	2.40693909477145	11930	438	299	19917	ZNF367,DDIAS,AURKA,ASF1B,NUF2,PTTG1,PKN3,SHCBP1,CDK2,CDK1,NCAPH,CEP55,FOXM1,KIF14,CCNB2,POLA2,KIF20A,TPX2,SGO1,CKS2,GTSE1,PRC1,NUSAP1,KIF2C,BIRC5,CHEK2,HJURP,ORC1,AURKB,ASPM,KIF4A,FANCD2,CCDC86,CENPK,NDC80,RASL10A,CHAF1A,CHEK1,IQGAP3,PCOLCE,CDC25C,CDCA3,CCNA2,GAS1,OIP5,NTSR2,MYO1C,WDR76,CEP152,SPC24,ZWINT,DEPDC1B,SMC4,UBE2C,SKA3,DTL,BUB1,NCAPG,CDCA2,CDCA5,MASTL,MLC1,MKI67,TRIP13,ESCO2,ESPL1,HMMR,…
TF	Factor: GABP-ALPHA; motif: RCCGGAARTNN; match class: 1	TF:M08917_1	0.0039895961632771685	2.39907106244268	389	438	21	19917	KIFC1,DEPDC1B,RIOK1,SNRPB,ZDHHC5,NCAPD2,REXO5,CKS1B,DAXX,NIP7,CD93,PMM2,PFN1,EME1,DNMT1,DPP9,C11ORF24,MDH2,CCDC77,EIF5A,RCC1
TF	Factor: ATF-1; motif: TNACGTCAN; match class: 1	TF:M01861_1	0.004092599452378465	2.388000758197173	1916	438	66	19917	ZNF367,AURKA,SHCBP1,DSN1,SGO1,CKS2,PRC1,FANCD2,CCDC86,NDC80,CHAF1A,CHEK1,MCM10,CCNA2,CEP152,DTL,CDCA5,MASTL,TRIP13,MGME1,RIOK1,TTK,PBK,EXO1,CENPN,SGO2,POLR1H,CENPE,WDR62,ZWILCH,PPM1D,MCM2,CENPW,MCM3,CDKN3,DEPDC1,MLXIP,RACGAP1,LRR1,DAAM2,TRIM26,NIP7,SIDT1,RFC3,MCAM,BRCA2,KIF15,DGCR6,C11ORF24,RAD54L,UBE2T,N4BP1,XRCC2,FEN1,DTYMK,PINX1,FSTL5,H2BC15,CCDC77,CBX8,INTS7,CDKN2C,PRXL2C,ODF2,ISG20L2,WDR53
TF	Factor: GABPA; motif: ACCGGAAGTN	TF:M03990	0.004111616509091973	2.3859873988162703	5312	438	151	19917	DDIAS,AURKA,NRM,MCM8,ASF1B,WEE1,PKN3,CDK2,CEP55,KIF14,TPX2,SGO1,CKS2,GTSE1,KIFC1,TGFB1I1,PIMREG,MELK,AURKB,KIF4A,FANCD2,ARHGAP11A,CDCA3,MYO1C,DEPDC1B,UBE2C,NCAPG,MASTL,TRIP13,ESPL1,MGME1,RIOK1,CEP135,SNRPB,KIF23,POC1A,ZDHHC5,NCAPD2,ECT2,KIF20B,PARPBP,LMNB2,PRIM2,C5ORF34,CDC45,CDC20,SLC26A2,CDC6,ZYX,ETNPPL,SF3B3,IKBIP,BUB1B,WDR62,NKIRAS2,RPIA,REXO5,RFWD3,TACC3,CKS1B,POLQ,MCM2,ARHGEF39,MCM3,EIF4A1,…
TF	Factor: Sp2; motif: TGGGCGCGCCCA	TF:M06948	0.004111616509091973	2.3859873988162703	8931	438	234	19917	ZNF367,AURKA,HASPIN,ASF1B,NUF2,WEE1,PKN3,CDK2,CDCA8,CEP55,FOXM1,KIF14,CHST1,SGO1,CKS2,GTSE1,TGFB1I1,NUSAP1,HJURP,MELK,ASPM,KIF4A,SFRP2,NDC80,FANCC,RASL10A,CHAF1A,CDC25C,CCNB1,MCM10,OIP5,NTSR2,MYO1C,PLK1,CEP152,SPC24,ZWINT,SMC4,UBE2C,SKA3,CDCA5,MASTL,MYBL2,MKI67,TRIP13,HMMR,PIM1,HMGA1,KIF23,POC1A,CKAP2L,ATAD2,TTK,EXO1,ZDHHC5,CENPM,NCAPD2,ZPR1,LMNB1,PCNA,RRM2,CENPN,PARPBP,E2F2,LMNB2,CBFB,CDC20,KNL1…
TF	Factor: Fli-1; motif: ACCGGAAGYN	TF:M02073	0.004111616509091973	2.3859873988162703	5905	438	165	19917	DDIAS,AURKA,NRM,MCM8,ASF1B,TP53I3,WEE1,PKN3,CDK2,CEP55,KIF14,TPX2,CKS2,GTSE1,KIFC1,TGFB1I1,PRC1,PIMREG,AURKB,KIF4A,FANCD2,CENPK,NDC80,ARHGAP11A,ERCC6L,CHEK1,CDCA3,MYO1C,SKA1,PLK1,DEPDC1B,UBE2C,NCAPG,MASTL,MLC1,TRIP13,MGME1,RIOK1,SNRPB,RAD51AP1,KIF23,POC1A,RAD51,EXO1,ZDHHC5,NCAPD2,KIF20B,PARPBP,E2F2,LMNB2,PRIM2,C5ORF34,CDC45,FANCI,CENPL,SLC26A2,ETNPPL,POLR1H,MLX,SF3B3,IKBIP,ZWILCH,NKIRAS2,RPIA,REX…
TF	Factor: PEA3; motif: NACCGGAAGTN; match class: 1	TF:M11427_1	0.004118007954449295	2.385312818822869	4645	438	135	19917	HASPIN,MCM8,ASF1B,KIF14,SGO1,CKS2,KIFC1,TGFB1I1,ORC1,ASPM,FANCD2,CCNB1,MYO1C,SKA1,PLK1,DEPDC1B,CDCA2,CDCA5,MASTL,TRIP13,MGME1,RIOK1,CEP135,SNRPB,KIF23,RAD51,ZDHHC5,NCAPD2,ZPR1,ECT2,PARPBP,PRIM2,CDC20,FANCI,SLC26A2,CDC6,ZYX,VKORC1,POLR1H,MLX,SF3B3,IKBIP,WDR62,ZWILCH,NKIRAS2,DSCC1,RPIA,REXO5,RFWD3,CKS1B,MCM2,MND1,MCM3,EIF4A1,MCM5,RFC2,TRAIP,KNSTRN,A2ML1,DAXX,RAD18,DEK,NSMCE2,TRIM26,NIP7,EDEM2,HAUS8…
TF	Factor: Pet-1; motif: ACCGGAWRTN	TF:M02072	0.004133317788886671	2.383701202834872	2408	438	79	19917	DDIAS,AURKA,KIF14,TPX2,GTSE1,KIFC1,KIF4A,FANCD2,ARHGAP11A,MYO1C,DEPDC1B,UBE2C,NCAPG,MASTL,RIOK1,SNRPB,KIF23,ZDHHC5,NCAPD2,LMNB2,C5ORF34,CDC45,ETNPPL,SF3B3,NKIRAS2,REXO5,RFWD3,CKS1B,POLQ,ARHGEF39,TRAIP,RACGAP1,KNSTRN,DAXX,RAD18,DEK,NIP7,EDEM2,RTKN2,DLGAP5,BFAR,SIDT1,CD93,MAD2L1,UFD1,PMM2,PFN1,EME1,ZSCAN16,SERPINH1,ORAI1,DDX19B,DYNLRB2,TPM4,DNMT1,PAK1IP1,BRCA2,DPP9,CORO1C,C11ORF24,KMT5A,TBC1D31,NCA…
TF	Factor: Net; motif: NRCCGGAAGTN	TF:M11440	0.004163009538483438	2.3805925940361203	449	438	23	19917	TPX2,KIFC1,SNRPB,ZDHHC5,CDC45,SF3B3,NKIRAS2,REXO5,CKS1B,KNSTRN,DAXX,BFAR,UFD1,EME1,DNMT1,KMT5A,TBC1D31,NCAPD3,VMP1,MDH2,RFC4,EIF5A,GINS2
TF	Factor: CREB1; motif: NNNNTGACGTNANNN; match class: 1	TF:M07248_1	0.00421293245119934	2.375415504155034	1233	438	47	19917	ZNF367,AURKA,DSN1,SGO1,CKS2,PRC1,FANCD2,CCDC86,NDC80,CHAF1A,CHEK1,MCM10,CCNA2,DTL,MASTL,MGME1,TTK,PBK,EXO1,CENPN,POLR1H,CENPE,WDR62,ZWILCH,PPM1D,MCM2,CENPW,MLXIP,DAAM2,TRIM26,NIP7,RFC3,MCAM,KIF15,C11ORF24,UBE2T,N4BP1,XRCC2,PINX1,FSTL5,H2BC15,CCDC77,CBX8,INTS7,CDKN2C,ISG20L2,WDR53
TF	Factor: CREB; motif: NSTGACGTMANN	TF:M00178	0.004295300230579303	2.3670064746902773	5320	438	151	19917	ZNF367,AURKA,CENPA,SHCBP1,CDK2,NCAPH,CEP55,FOXM1,DSN1,SGO1,CKS2,KIFC1,PRC1,AURKB,ASPM,FANCD2,CCDC86,CENPK,NDC80,TOP2A,CHAF1A,CHEK1,PCOLCE,CDCA3,MCM10,CCNA2,NTSR2,SKA1,PLK1,CEP152,SPC24,DEPDC1B,UBE2C,SKA3,DTL,CDCA5,MASTL,MKI67,HMMR,MGME1,PIM1,RIOK1,SNRPB,RAD51AP1,TTK,PBK,EXO1,NCAPD2,PCNA,KIF20B,CENPN,C5ORF34,KNL1,CENPH,SGO2,IGIP,ETNPPL,POLR1H,CCND1,CENPE,WDR62,ZWILCH,NKIRAS2,HPSE2,PPM1D,SREBF1,MCM…
TF	Factor: ELK-1; motif: ACCGGAAGTN; match class: 1	TF:M02059_1	0.004295300230579303	2.3670064746902773	3792	438	114	19917	DDIAS,HASPIN,MCM8,ASF1B,KIF14,CKS2,KIFC1,TGFB1I1,ORC1,FANCD2,CHAF1A,MYO1C,PLK1,DEPDC1B,SMC4,CDCA5,MASTL,TRIP13,MGME1,RIOK1,SNRPB,KIF23,RAD51,ZDHHC5,NCAPD2,ZPR1,PARPBP,PRIM2,CDC20,FANCI,CENPL,SLC26A2,ZYX,POLR1H,MLX,SF3B3,ZWILCH,RPIA,REXO5,RFWD3,TACC3,CKS1B,MND1,EIF4A1,MCM5,RFC2,TRAIP,KNSTRN,A2ML1,DAXX,RAD18,DEK,NIP7,EDEM2,DLGAP5,KBTBD11,CD93,MAD2L1,PMM2,PFN1,STUM,EME1,E2F7,ZSCAN16,USB1,CFAP20,SERP…
TF	Factor: CREB1; motif: NNTGACGTCANN; match class: 1	TF:M11220_1	0.004295300230579303	2.3670064746902773	1737	438	61	19917	ZNF367,AURKA,PRC1,AURKB,ASPM,FANCD2,CCDC86,CENPK,NDC80,CHAF1A,PCOLCE,MCM10,CCNA2,DTL,MASTL,MGME1,SNRPB,TTK,PBK,EXO1,CENPN,C5ORF34,CENPH,SGO2,POLR1H,CCND1,CENPE,PPM1D,SREBF1,CENPW,MCM3,EIF4A1,DEPDC1,MLXIP,DAAM2,RAD18,TRIM26,DLGAP5,SIDT1,RFC3,BRCA1,CFAP20,MCAM,KIF15,IGFN1,DGCR6,C11ORF24,POLR3D,N4BP1,XRCC2,VMP1,DESI2,MSH6,PINX1,FSTL5,H2BC15,CCDC77,PRIM1,CBX8,INTS7,SLC25A48
TF	Factor: IRX2a; motif: ACRYGNNNNACRYGT; match class: 1	TF:M11022_1	0.004295300230579303	2.3670064746902773	6298	438	174	19917	ZNF367,MCM8,CENPA,WEE1,CDCA8,CEP55,FOXM1,CHST1,DSN1,KIFC1,PRC1,ORC1,CCDC86,NDC80,RASL10A,CHAF1A,CCNB1,NTSR2,MYO1C,FKBP7,SMC4,UBE2C,SKA3,CDCA2,CDCA5,MYBL2,ESCO2,MGME1,HMGA1,KIF23,POC1A,RAD51,CKAP2L,PBK,EXO1,ZDHHC5,CENPM,NCAPD2,LMNB1,PCNA,PARPBP,LMNB2,KNL1,FANCI,FRMD8,SLC26A2,CAV1,ZYX,ETNPPL,VKORC1,MLX,SF3B3,IKBIP,BUB1B,KLF10,WDR62,BORA,RPIA,TACC3,TONSL,MCM2,CDCA4,EIF4A1,MCM5,DEPDC1,MLXIP,RACGAP1,R…
TF	Factor: Erg; motif: NACCGGATATCCGGTN; match class: 1	TF:M11393_1	0.004295300230579303	2.3670064746902773	13785	438	337	19917	DDIAS,NRM,HASPIN,MCM8,ASF1B,NUF2,PTTG1,TP53I3,CENPA,WEE1,PKN3,SHCBP1,FOXM1,KIF14,POLA2,KIF20A,TPX2,CHST1,DSN1,SGO1,CKS2,GTSE1,KIFC1,TGFB1I1,PIMREG,NUSAP1,BIRC5,CHEK2,HJURP,MELK,ORC1,ASPM,KIF4A,SFRP2,FANCD2,CENPK,NDC80,RASL10A,TOP2A,CHAF1A,CHEK1,PCOLCE,TROAP,CDCA3,CCNB1,CCNA2,GAS1,OIP5,NTSR2,MYO1C,FKBP7,SKA1,WDR76,PLK1,CEP152,DEPDC1B,SMC4,SKA3,DTL,NCAPG,CDCA5,MASTL,MYBL2,MLC1,MKI67,TRIP13,ESCO2,ES…
TF	Factor: Erg; motif: NACCGGATATCCGGTN	TF:M11391	0.004380529320324565	2.35847340844413	10173	438	261	19917	DDIAS,HASPIN,MCM8,ASF1B,NUF2,TP53I3,CENPA,WEE1,PKN3,CDK1,FOXM1,KIF14,POLA2,KIF20A,TPX2,CHST1,KIFC1,TGFB1I1,PIMREG,NUSAP1,KIF2C,HJURP,MELK,ASPM,KIF4A,SFRP2,RASL10A,TOP2A,CHEK1,PCOLCE,CDCA3,CCNB1,MCM10,CCNA2,OIP5,MYO1C,PLK1,CEP152,DEPDC1B,SMC4,UBE2C,SKA3,DTL,NCAPG,CDCA5,MASTL,MYBL2,MLC1,HMMR,PIM1,RIOK1,CEP135,HMGA1,SNRPB,KIF18A,RAD51,CKAP2L,ATAD2,TTK,PBK,BRIP1,ZDHHC5,NCAPD2,ZPR1,PCNA,KIF20B,CENPN,E…
TF	Factor: Erg; motif: NACCGGATATCCGGTN	TF:M11393	0.004615612961701337	2.335770615719886	14242	438	346	19917	DDIAS,NRM,HASPIN,MCM8,ASF1B,NUF2,PTTG1,TP53I3,CENPA,WEE1,PKN3,SHCBP1,CDK1,FOXM1,KIF14,POLA2,KIF20A,TPX2,CHST1,DSN1,SGO1,CKS2,GTSE1,KIFC1,TGFB1I1,PIMREG,NUSAP1,BIRC5,CHEK2,HJURP,MELK,ORC1,ASPM,KIF4A,SFRP2,FANCD2,CENPK,NDC80,RASL10A,TOP2A,CHAF1A,CHEK1,IQGAP3,PCOLCE,TROAP,CDCA3,CCNB1,CCNA2,GAS1,OIP5,NTSR2,MYO1C,FKBP7,SKA1,WDR76,PLK1,CEP152,DEPDC1B,SMC4,SKA3,DTL,NCAPG,CDCA5,MASTL,MYBL2,MLC1,MKI67,TRI…
TF	Factor: NF-YB; motif: NNNYNRRCCAATCAG	TF:M07115	0.004676101982168966	2.33011602578003	544	438	26	19917	ASF1B,CDK1,NCAPH,KIF20A,TPX2,CKS2,PIMREG,ARHGAP11A,TOP2A,CDCA2,CENPF,KIF23,ATAD2,HMGB2,CDKN3,DEK,UBALD2,E2F7,ORC6,CDC25A,MTFR2,FAAP24,GABRG1,PRR11,STIP1,NUP93
TF	Factor: CREB; motif: TGACGTMA	TF:M00039	0.004750453977625984	2.323264884994762	5290	438	150	19917	ZNF367,DDIAS,AURKA,NUF2,CENPA,SHCBP1,CDK2,CDK1,NCAPH,CEP55,KIF20A,DSN1,SGO1,CKS2,KIFC1,PRC1,KIF2C,MELK,ORC1,AURKB,ASPM,FANCD2,CCDC86,CENPK,NDC80,FANCC,TOP2A,CHAF1A,CHEK1,PCOLCE,MCM10,CCNA2,SPC24,DEPDC1B,SMC4,DTL,CDCA2,CDCA5,MASTL,TRIP13,MGME1,PIM1,RIOK1,SNRPB,TTK,PBK,EXO1,NCAPD2,CENPN,C5ORF34,CENPH,SGO2,IGIP,CAV1,DAP3,POLR1H,CCND1,CENPE,IKBIP,WDR62,ZWILCH,NKIRAS2,PPM1D,SREBF1,MCM2,CDCA4,CENPW,NR2…
TF	Factor: ERG; motif: ACCGGAARTN; match class: 1	TF:M03975_1	0.004802999364975064	2.3184874707809513	4048	438	120	19917	DDIAS,MCM8,ASF1B,TP53I3,WEE1,KIF14,CKS2,GTSE1,KIFC1,TGFB1I1,HJURP,ORC1,ARHGAP11A,ERCC6L,CHEK1,MCM10,MYO1C,PLK1,DEPDC1B,SMC4,CDCA5,MASTL,TRIP13,RIOK1,CEP135,SNRPB,KIF18A,RAD51,ZDHHC5,NCAPD2,LMNB1,PARPBP,PRIM2,C5ORF34,CDC20,FANCI,CENPL,SLC26A2,ZYX,POLR1H,MLX,SF3B3,IKBIP,DSCC1,RPIA,REXO5,RFWD3,TACC3,CKS1B,MND1,MCM5,RFC2,TRAIP,C18ORF54,RACGAP1,DAXX,RAD18,DEK,WDHD1,NIP7,EDEM2,DLGAP5,KBTBD11,ABT1,CD93,…
TF	Factor: SAP-1; motif: NTCGTAAATGCN; match class: 1	TF:M11438_1	0.004981780530474484	2.302615408976019	1209	438	46	19917	DDIAS,SHCBP1,CCNB2,KIF20A,NUSAP1,ORC1,ARHGAP11A,TOP2A,MCM10,OIP5,DEPDC1B,SMC4,HMMR,CENPF,SNRPB,NCAPD2,CENPN,PRIM2,CDC45,CENPL,HPSE2,MCM5,KNTC1,WDR12,LRR1,TRIM26,NIP7,BFAR,MAD2L1,UFD1,BRCA1,ORC6,CKAP2,KDM4D,TPM4,GPN1,RAD54L,POLH,BBC3,TBC1D31,MKX,BCOR,INCENP,CKLF,RCC1,INTS7
TF	Factor: CREB1; motif: NNTGACGTCANN	TF:M11220	0.0050328557378841446	2.2981855180707305	1749	438	61	19917	ZNF367,AURKA,PRC1,AURKB,ASPM,FANCD2,CCDC86,CENPK,NDC80,CHAF1A,PCOLCE,MCM10,CCNA2,DTL,MASTL,MGME1,SNRPB,TTK,PBK,EXO1,CENPN,C5ORF34,CENPH,SGO2,POLR1H,CCND1,CENPE,PPM1D,SREBF1,CENPW,MCM3,EIF4A1,DEPDC1,MLXIP,DAAM2,RAD18,TRIM26,DLGAP5,SIDT1,RFC3,BRCA1,CFAP20,MCAM,KIF15,IGFN1,DGCR6,C11ORF24,POLR3D,N4BP1,XRCC2,VMP1,DESI2,MSH6,PINX1,FSTL5,H2BC15,CCDC77,PRIM1,CBX8,INTS7,SLC25A48
TF	Factor: Elf-1; motif: NANSCGGAAGTR	TF:M11450	0.005204516149538501	2.2836196395161696	5640	438	158	19917	DDIAS,AURKA,HASPIN,MCM8,ASF1B,NUF2,CDCA8,KIF14,CCNB2,TPX2,CHST1,SGO1,CKS2,GTSE1,KIFC1,ORC1,AURKB,KIF4A,FANCD2,FANCC,TOP2A,CHAF1A,TROAP,MYO1C,FKBP7,ZWINT,UBE2C,BUB1,NCAPG,CDCA5,MASTL,TRIP13,RIOK1,SNRPB,KIF23,RAD51,ZDHHC5,NCAPD2,ZPR1,PARPBP,LMNB2,PRIM2,C5ORF34,CDC45,CBFB,KNL1,FANCI,FRMD8,ETNPPL,DAP3,CCND1,SF3B3,IKBIP,ZWILCH,NKIRAS2,REXO5,RFWD3,CKS1B,POLQ,ARHGEF39,CENPW,MCM3,EIF4A1,MCM5,CDKN3,RFC2,T…
TF	Factor: B-Myb; motif: NTRACSGTYNN	TF:M11724	0.005204516149538501	2.2836196395161696	1177	438	45	19917	CKS2,CENPK,ARHGAP11A,DTL,ESCO2,CEP135,RAD51AP1,TTK,CENPM,PRIM2,CDC20,VKORC1,IKBIP,WDR62,REXO5,HMGB2,PPM1D,CDCA4,MCM3,CDKN3,TRAIP,DEPDC1,RACGAP1,MMP28,MAP3K1,EME1,KDM4D,DDX19B,CLSPN,E2F1,UCK2,EZH2,POLH,SOGA1,SMARCAL1,ELOVL2,MSH6,UTP4,MANF,TMEM45A,NRG3,CCDC77,TRIAP1,INTS7,HMGCLL1
TF	Factor: B-Myb; motif: NTRACSGTYNN; match class: 1	TF:M11724_1	0.005204516149538501	2.2836196395161696	1177	438	45	19917	CKS2,CENPK,ARHGAP11A,DTL,ESCO2,CEP135,RAD51AP1,TTK,CENPM,PRIM2,CDC20,VKORC1,IKBIP,WDR62,REXO5,HMGB2,PPM1D,CDCA4,MCM3,CDKN3,TRAIP,DEPDC1,RACGAP1,MMP28,MAP3K1,EME1,KDM4D,DDX19B,CLSPN,E2F1,UCK2,EZH2,POLH,SOGA1,SMARCAL1,ELOVL2,MSH6,UTP4,MANF,TMEM45A,NRG3,CCDC77,TRIAP1,INTS7,HMGCLL1
TF	Factor: CREB; motif: NNTKACGTCANNNS; match class: 1	TF:M00916_1	0.005266170848803405	2.2785050553156054	1716	438	60	19917	ZNF367,AURKA,DSN1,SGO1,CKS2,PRC1,FANCD2,CCDC86,NDC80,CHAF1A,CHEK1,MCM10,CCNA2,SKA1,DTL,CDCA5,MASTL,TRIP13,MGME1,RIOK1,TTK,PBK,EXO1,CENPN,SGO2,POLR1H,CENPE,WDR62,ZWILCH,PPM1D,SREBF1,MCM2,CENPW,MCM3,DEPDC1,MLXIP,DAAM2,TRIM26,NIP7,RFC3,MCAM,KIF15,DGCR6,C11ORF24,UBE2T,NUP188,N4BP1,XRCC2,CDC25B,DTYMK,PINX1,FSTL5,H2BC15,CCDC77,HROB,CBX8,INTS7,CDKN2C,ISG20L2,WDR53
TF	Factor: E2F-3; motif: NTTTTGGCGCCAAAAN; match class: 1	TF:M11526_1	0.00528288488975837	2.277128852172684	6845	438	186	19917	DDIAS,HASPIN,MCM8,CENPA,WEE1,CDK2,NCAPH,CDCA8,CEP55,POLA2,KIF20A,TPX2,DSN1,NUSAP1,KIF11,ORC1,AURKB,KIF4A,CCDC86,NDC80,CHEK1,IQGAP3,PCOLCE,TROAP,MCM10,CCNA2,OIP5,MYO1C,PLK1,SPC24,SMC4,UBE2C,SKA3,DTL,CDCA2,MASTL,MKI67,ESPL1,HMMR,PIM1,RAD51AP1,KIF18A,POC1A,ATAD2,PBK,ZDHHC5,CENPM,NCAPD2,ECT2,RRM2,E2F2,PRIM2,C5ORF34,CBFB,KNL1,CENPH,CENPL,FRMD8,SLC26A2,CDC6,SGO2,TIMELESS,ZYX,KPNA2,CCND1,SF3B3,IKBIP,KLF…
TF	Factor: MYBL1; motif: NNAACCGTTAA	TF:M04044	0.005323258608869852	2.2738224348836074	519	438	25	19917	WEE1,CENPK,DTL,ESCO2,CEP135,RAD51AP1,PRIM2,CDC20,VKORC1,IKBIP,REXO5,PPM1D,MCM3,TRAIP,RACGAP1,MMP28,UCK2,EZH2,SOGA1,SMARCAL1,UTP4,ZSCAN9,TRIAP1,INTS7,HMGCLL1
TF	Factor: ERG; motif: ACCGGAWATCCGGT; match class: 1	TF:M03976_1	0.005352256412958636	2.2714630888004863	7856	438	209	19917	DDIAS,ASF1B,CENPA,WEE1,PKN3,FOXM1,KIF14,POLA2,KIF20A,TPX2,CHST1,KIFC1,PIMREG,NUSAP1,BIRC5,HJURP,MELK,ASPM,KIF4A,CENPK,NDC80,RASL10A,TOP2A,PCOLCE,CDCA3,CCNA2,GAS1,OIP5,MYO1C,WDR76,PLK1,DEPDC1B,SMC4,SKA3,DTL,NCAPG,CDCA5,MASTL,MYBL2,TRIP13,HMMR,MGME1,PIM1,RIOK1,CEP135,SNRPB,RAD51AP1,KIF23,KIF18A,RAD51,CKAP2L,ATAD2,ZPR1,PCNA,E2F2,LMNB2,PRIM2,C5ORF34,CDC45,CBFB,KNL1,FANCI,CENPH,FRMD8,GEMIN6,SLC26A2,TI…
TF	Factor: E2F-1; motif: WWTGGCGCCAAA; match class: 1	TF:M04515_1	0.005373210841495995	2.269766117647997	12267	438	305	19917	ZNF367,DDIAS,AURKA,TP53I3,CENPA,WEE1,PKN3,SHCBP1,CDK1,NCAPH,CDCA8,CEP55,FOXM1,KIF14,CCNB2,POLA2,TPX2,CHST1,DSN1,CKS2,GTSE1,KIFC1,TGFB1I1,PRC1,PIMREG,NUSAP1,KIF2C,CHEK2,HJURP,KIF11,MELK,ORC1,ASPM,CCDC86,CENPK,NDC80,FANCC,RASL10A,TOP2A,CHAF1A,ERCC6L,CHEK1,IQGAP3,MCM10,CCNA2,GAS1,OIP5,NTSR2,MYO1C,WDR76,CEP152,SPC24,ZWINT,DEPDC1B,SMC4,UBE2C,SKA3,DTL,BUB1,CDCA5,MASTL,MYBL2,MKI67,TRIP13,ESCO2,ESPL1,HMM…
TF	Factor: Elk-1:HOXB13; motif: ACCGGAAGTNGTAAAN	TF:M08222	0.005373210841495995	2.269766117647997	7725	438	206	19917	DDIAS,AURKA,HASPIN,MCM8,PTTG1,CENPA,WEE1,PKN3,SHCBP1,CDK2,CDK1,NCAPH,CDCA8,KIF14,TPX2,CHST1,SGO1,CKS2,KIFC1,PRC1,PIMREG,BIRC5,CHEK2,HJURP,KIF11,AURKB,ASPM,FANCD2,CENPK,CHAF1A,PCOLCE,CDC25C,CDCA3,MYO1C,FKBP7,PLK1,DTL,NCAPG,CDCA5,MASTL,MKI67,ESPL1,MGME1,RIOK1,SNRPB,KIF23,KIF18A,POC1A,RAD51,EXO1,BRIP1,ZDHHC5,NCAPD2,ZPR1,RRM2,ALDOC,PARPBP,LMNB2,PRIM2,C5ORF34,CDC45,CBFB,KNL1,PON1,CENPL,SLC26A2,CDC6,IG…
TF	Factor: CREB1; motif: TGACGTCA	TF:M02279	0.005373210841495995	2.269766117647997	1755	438	61	19917	ZNF367,AURKA,PRC1,AURKB,ASPM,FANCD2,CCDC86,CENPK,NDC80,CHAF1A,PCOLCE,MCM10,CCNA2,DTL,MASTL,MGME1,SNRPB,TTK,PBK,EXO1,CENPN,C5ORF34,CENPH,SGO2,POLR1H,CCND1,CENPE,PPM1D,SREBF1,CENPW,MCM3,EIF4A1,DEPDC1,MLXIP,DAAM2,RAD18,TRIM26,DLGAP5,SIDT1,RFC3,BRCA1,CFAP20,MCAM,KIF15,IGFN1,DGCR6,C11ORF24,POLR3D,N4BP1,XRCC2,VMP1,DESI2,MSH6,PINX1,FSTL5,H2BC15,CCDC77,PRIM1,CBX8,INTS7,SLC25A48
TF	Factor: foxl2; motif: NACGTMAACAN	TF:M11578	0.005417046640789857	2.266237425119745	5520	438	155	19917	ZNF367,AURKA,HASPIN,ASF1B,NUF2,PTTG1,CENPA,WEE1,SHCBP1,CDK2,CDCA8,CEP55,KIF20A,DSN1,SGO1,CKS2,GTSE1,PRC1,ORC1,AURKB,KIF4A,CCDC86,FANCC,TOP2A,CHAF1A,CHEK1,CDC25C,CCNA2,ZWINT,DTL,MYBL2,MKI67,TRIP13,HMMR,MGME1,RIOK1,CEP135,SNRPB,RAD51AP1,RAD51,CKAP2L,ATAD2,TTK,EXO1,CENPM,PCNA,KIF20B,ALDOC,PARPBP,C5ORF34,CDC45,CBFB,CDC20,KNL1,GEMIN6,IGIP,ZYX,ETNPPL,VKORC1,DAP3,MLX,SF3B3,IKBIP,BUB1B,ZWILCH,NKIRAS2,DSC…
TF	Factor: Net; motif: ACCGGAAGTN	TF:M11443	0.00557114489386528	2.254055546299514	289	438	17	19917	KIFC1,SNRPB,ZDHHC5,CDC45,SF3B3,NKIRAS2,REXO5,CKS1B,BFAR,UFD1,EME1,DNMT1,TBC1D31,NCAPD3,VMP1,RFC4,EIF5A
TF	Factor: CREB; motif: CNNTGACGTMA; match class: 1	TF:M00917_1	0.0056106112681709955	2.250989820395926	1612	438	57	19917	ZNF367,AURKA,DSN1,SGO1,CKS2,PRC1,FANCD2,CCDC86,NDC80,CHAF1A,CHEK1,MCM10,CCNA2,CEP152,DTL,CDCA5,MASTL,MGME1,TTK,PBK,EXO1,CENPN,SGO2,POLR1H,CENPE,WDR62,ZWILCH,PPM1D,MCM2,CENPW,MCM3,DEPDC1,MLXIP,DAAM2,TRIM26,NIP7,SIDT1,RFC3,MCAM,KIF15,DGCR6,C11ORF24,RAD54L,UBE2T,N4BP1,XRCC2,DTYMK,PINX1,FSTL5,H2BC15,CCDC77,HROB,CBX8,INTS7,CDKN2C,ISG20L2,WDR53
TF	Factor: FLI1; motif: ACCGGAAATCCGGT; match class: 1	TF:M03989_1	0.005865801428493092	2.2316726430208926	5657	438	158	19917	DDIAS,ASF1B,TP53I3,CENPA,PKN3,KIF14,POLA2,KIF20A,TPX2,CHST1,KIFC1,PIMREG,NUSAP1,HJURP,MELK,ASPM,RASL10A,TOP2A,PCOLCE,CDCA3,CCNA2,OIP5,MYO1C,PLK1,DEPDC1B,SMC4,SKA3,DTL,NCAPG,CDCA5,MYBL2,HMMR,PIM1,RIOK1,CEP135,SNRPB,KIF18A,CKAP2L,ZPR1,E2F2,PRIM2,C5ORF34,CDC45,KNL1,FANCI,CENPH,SLC26A2,TIMELESS,VKORC1,DAP3,POLR1H,SF3B3,WDR62,NKIRAS2,BORA,RPIA,TONSL,CKS1B,HMGB2,PPM1D,TCF19,FAM111B,NR2C2AP,MCM5,WDR12,L…
TF	Factor: AP-2gamma:Elk-1; motif: NGCCKNRGGSGRCGGAAGTG	TF:M08441	0.005926339653805259	2.2272134616061843	16491	438	389	19917	ZNF367,DDIAS,AURKA,NRM,HASPIN,ASF1B,NUF2,PTTG1,TP53I3,CENPA,WEE1,PKN3,SHCBP1,CDK2,CDK1,NCAPH,CDCA8,CEP55,FOXM1,KIF14,CCNB2,POLA2,KIF20A,TPX2,CHST1,DSN1,CKS2,GTSE1,KIFC1,TGFB1I1,PIMREG,NUSAP1,BIRC5,CHEK2,HJURP,KIF11,MELK,ORC1,AURKB,ASPM,KIF4A,SFRP2,FANCD2,CCDC86,CENPK,FANCC,RASL10A,ARHGAP11A,TOP2A,CHAF1A,ERCC6L,CHEK1,IQGAP3,PCOLCE,CDC25C,CDCA3,CCNB1,MCM10,GAS1,OIP5,NTSR2,MYO1C,FKBP7,SKA1,WDR76,PLK…
TF	Factor: Elf-1; motif: NAANCMGGAAGTGN	TF:M09605	0.00624925251427834	2.2041719263900377	5835	438	162	19917	ZNF367,DDIAS,AURKA,MCM8,ASF1B,NUF2,CENPA,PKN3,SHCBP1,CDK2,CEP55,KIF14,TPX2,CKS2,GTSE1,KIFC1,TGFB1I1,PIMREG,MELK,AURKB,KIF4A,FANCD2,ERCC6L,TROAP,CDCA3,MYO1C,PLK1,UBE2C,NCAPG,CDCA2,CDCA5,MASTL,TRIP13,ESPL1,RIOK1,SNRPB,KIF23,POC1A,RAD51,TTK,ZDHHC5,NCAPD2,KIF20B,PARPBP,LMNB2,PRIM2,C5ORF34,CDC45,CDC20,FANCI,FRMD8,SLC26A2,ZYX,ETNPPL,MLX,SF3B3,CENPE,IKBIP,NKIRAS2,DSCC1,RPIA,REXO5,RFWD3,TACC3,NEK2,TONSL,…
TF	Factor: PAX-7; motif: NASCGTRACKAAT	TF:M08959	0.006524647816570691	2.1854429254376275	10648	438	270	19917	DDIAS,AURKA,MCM8,ASF1B,PTTG1,PKN3,SHCBP1,CDK2,NCAPH,CDCA8,FOXM1,KIF14,CCNB2,TPX2,DSN1,SGO1,GTSE1,PIMREG,NUSAP1,CHEK2,HJURP,KIF11,ORC1,AURKB,ASPM,KIF4A,SFRP2,CENPK,FANCC,TOP2A,CHAF1A,CHEK1,IQGAP3,PCOLCE,CDC25C,CDCA3,CCNB1,CCNA2,GAS1,OIP5,FKBP7,SKA1,WDR76,PLK1,CEP152,SPC24,SMC4,UBE2C,SKA3,DTL,BUB1,NCAPG,CDCA5,MKI67,TRIP13,ESCO2,HMMR,MGME1,CENPF,PIM1,RAD51AP1,KIF23,KIF18A,POC1A,RAD51,CKAP2L,PBK,BRIP…
TF	Factor: LHX4; motif: NNCRTTAN	TF:M11005	0.00672212041422237	2.1724937122229933	10745	438	272	19917	ZNF367,DDIAS,AURKA,HASPIN,MCM8,NUF2,PTTG1,TP53I3,CENPA,WEE1,PKN3,SHCBP1,NCAPH,CDCA8,CEP55,FOXM1,KIF14,CCNB2,POLA2,TPX2,DSN1,SGO1,CKS2,GTSE1,PRC1,PIMREG,NUSAP1,KIF2C,HJURP,KIF11,ORC1,AURKB,ASPM,KIF4A,FANCD2,CCDC86,CENPK,RASL10A,ARHGAP11A,TOP2A,CHAF1A,ERCC6L,PCOLCE,CDC25C,CDCA3,CCNB1,MCM10,GAS1,OIP5,NTSR2,FKBP7,SKA1,WDR76,PLK1,CEP152,SPC24,DEPDC1B,SMC4,UBE2C,SKA3,DTL,BUB1,NCAPG,CDCA2,MLC1,MKI67,ESC…
TF	Factor: ATF-2; motif: NNTGACGTMANN	TF:M11307	0.006777283482237633	2.168944348180744	2110	438	70	19917	ZNF367,AURKA,PRC1,AURKB,ASPM,FANCD2,CCDC86,CENPK,NDC80,CHAF1A,PCOLCE,MCM10,CCNA2,SKA3,DTL,MASTL,MGME1,SNRPB,TTK,PBK,EXO1,LMNB1,CENPN,C5ORF34,CENPH,SGO2,POLR1H,CCND1,CENPE,PPM1D,SREBF1,ACOX2,CENPW,MCM3,EIF4A1,DEPDC1,MLXIP,DAAM2,RAD18,TRIM26,DLGAP5,SIDT1,RFC3,BRCA1,CFAP20,DDX19B,LRRN4CL,MCAM,KIF15,IGFN1,DGCR6,C11ORF24,POLR3D,N4BP1,XRCC2,VMP1,RRP1B,DESI2,MSH6,PRPF4,PINX1,TMEM45A,FSTL5,H2BC15,CCDC77,…
TF	Factor: alpha-CP1; motif: CAGCCAATGAG; match class: 1	TF:M00687_1	0.006855892112103825	2.163936025315698	241	438	15	19917	CENPA,CCNB2,ASPM,TOP2A,CDCA3,CDCA2,LMNB2,CDC6,HMGB2,CDKN3,CDC25A,FAM72D,RAD54L,GABRG1,PRR11
TF	Factor: Pet-1; motif: ACCGGAWRTN; match class: 1	TF:M02072_1	0.0069273802809989545	2.159430970959055	323	438	18	19917	KIF14,KIFC1,RIOK1,SNRPB,NCAPD2,REXO5,CKS1B,DAXX,CD93,PMM2,PFN1,EME1,DNMT1,DPP9,MDH2,CCDC77,EIF5A,RCC1
TF	Factor: ELF3; motif: WACCCGGAAGTAN	TF:M03967	0.0069273802809989545	2.159430970959055	7672	438	204	19917	ZNF367,DDIAS,AURKA,HASPIN,ASF1B,CENPA,WEE1,NCAPH,KIF14,CCNB2,TPX2,CHST1,SGO1,GTSE1,KIFC1,HJURP,AURKB,ASPM,KIF4A,FANCD2,NDC80,PCOLCE,TROAP,CDCA3,CCNA2,MYO1C,SKA1,WDR76,CEP152,UBE2C,SKA3,NCAPG,CDCA5,MASTL,TRIP13,CENPF,RIOK1,SNRPB,KIF23,RAD51,EXO1,ZDHHC5,NCAPD2,ZPR1,ECT2,RRM2,KIF20B,ALDOC,PARPBP,LMNB2,PRIM2,C5ORF34,CDC45,FANCI,CENPH,FRMD8,SLC26A2,CDC6,SGO2,ZYX,ETNPPL,VKORC1,DAP3,KPNA2,MLX,SF3B3,IKBI…
TF	Factor: ATF-1; motif: NNNTGACGTNNN; match class: 1	TF:M07034_1	0.0070539692508524475	2.1515664378091888	1197	438	45	19917	ZNF367,AURKA,DSN1,CKS2,PRC1,FANCD2,CCDC86,NDC80,CHEK1,MCM10,CCNA2,DTL,MASTL,MGME1,TTK,PBK,EXO1,CENPN,POLR1H,CENPE,WDR62,ZWILCH,PPM1D,MCM2,CENPW,MLXIP,DAAM2,TRIM26,NIP7,RFC3,MCAM,KIF15,C11ORF24,UBE2T,XRCC2,DTYMK,PINX1,FSTL5,H2BC15,CCDC77,CBX8,INTS7,CDKN2C,ISG20L2,WDR53
TF	Factor: PEA3; motif: NACCGGAAGTN	TF:M11425	0.007061926248074817	2.1510768223466106	7499	438	200	19917	DDIAS,AURKA,NRM,HASPIN,MCM8,ASF1B,NUF2,CENPA,PKN3,SHCBP1,CDK2,CEP55,KIF14,CCNB2,TPX2,SGO1,CKS2,GTSE1,KIFC1,TGFB1I1,PIMREG,HJURP,MELK,AURKB,KIF4A,FANCD2,FANCC,ARHGAP11A,ERCC6L,IQGAP3,TROAP,CDCA3,CCNB1,MYO1C,SKA1,PLK1,DEPDC1B,SMC4,UBE2C,NCAPG,CDCA2,CDCA5,MASTL,MLC1,TRIP13,ESPL1,MGME1,RIOK1,CEP135,SNRPB,KIF23,POC1A,RAD51,TTK,ZDHHC5,NCAPD2,ZPR1,RRM2,KIF20B,ALDOC,PARPBP,LMNB2,PRIM2,C5ORF34,CDC45,CDC20…
TF	Factor: TEF-3:ER81; motif: ACCGGAAATRCC; match class: 1	TF:M08423_1	0.007073012756000497	2.1503955586776784	657	438	29	19917	DDIAS,KIFC1,DEPDC1B,SMC4,CDCA5,SNRPB,ZDHHC5,C5ORF34,CDC45,CENPL,REXO5,CKS1B,DAXX,NIP7,BFAR,CD93,MAD2L1,UFD1,PMM2,PFN1,EME1,BRCA1,DNMT1,DPP9,C11ORF24,TBC1D31,MDH2,RCC1,ISG20L2
TF	Factor: ESE-1; motif: NWTRCGGAWGCN	TF:M11382	0.007398827917008906	2.13083707344363	10437	438	265	19917	DDIAS,AURKA,MCM8,ASF1B,NUF2,CENPA,WEE1,PKN3,SHCBP1,CDCA8,CEP55,FOXM1,CCNB2,POLA2,KIF20A,TPX2,SGO1,CKS2,GTSE1,KIFC1,TGFB1I1,PIMREG,NUSAP1,KIF2C,CHEK2,MELK,ORC1,AURKB,KIF4A,FANCD2,CCDC86,FANCC,RASL10A,ARHGAP11A,TOP2A,CHAF1A,ERCC6L,CDC25C,CCNA2,GAS1,OIP5,FKBP7,SKA1,PLK1,CEP152,SPC24,ZWINT,DEPDC1B,UBE2C,SKA3,DTL,BUB1,NCAPG,CDCA2,CDCA5,MASTL,MKI67,TRIP13,MGME1,CENPF,PIM1,RIOK1,HMGA1,SNRPB,KIF23,KIF18A…
TF	Factor: YB-1; motif: NNNNCCAATNN	TF:M03862	0.007398827917008906	2.13083707344363	9293	438	240	19917	ZNF367,DDIAS,AURKA,MCM8,ASF1B,PTTG1,CENPA,WEE1,CDK1,NCAPH,CDCA8,CEP55,FOXM1,KIF14,CCNB2,KIF20A,TPX2,CHST1,SGO1,CKS2,GTSE1,KIFC1,TGFB1I1,PRC1,PIMREG,NUSAP1,CHEK2,HJURP,MELK,ORC1,AURKB,ASPM,SFRP2,CCDC86,CENPK,NDC80,TOP2A,CHAF1A,ERCC6L,TROAP,CDCA3,CCNB1,MCM10,OIP5,FKBP7,SKA1,PLK1,CEP152,ZWINT,DEPDC1B,UBE2C,DTL,BUB1,CDCA2,CDCA5,MLC1,MKI67,ESCO2,ESPL1,CENPF,RIOK1,HMGA1,KIF23,KIF18A,POC1A,CKAP2L,ATAD2,…
TF	Factor: CREB,; motif: NTGACGTNA	TF:M00981	0.007398827917008906	2.13083707344363	8437	438	221	19917	ZNF367,DDIAS,AURKA,NUF2,CENPA,SHCBP1,CDK2,CDK1,NCAPH,CEP55,FOXM1,POLA2,KIF20A,DSN1,SGO1,CKS2,KIFC1,PRC1,KIF2C,MELK,ORC1,AURKB,ASPM,FANCD2,CCDC86,CENPK,NDC80,FANCC,TOP2A,CHAF1A,CHEK1,PCOLCE,CDCA3,MCM10,CCNA2,NTSR2,MYO1C,FKBP7,SKA1,WDR76,PLK1,CEP152,SPC24,DEPDC1B,SMC4,SKA3,DTL,CDCA2,CDCA5,MASTL,MYBL2,MKI67,TRIP13,ESCO2,ESPL1,HMMR,MGME1,PIM1,RIOK1,HMGA1,SNRPB,RAD51AP1,KIF23,ATAD2,TTK,PBK,EXO1,NCAPD2…
TF	Factor: isx; motif: NTCRTTAA; match class: 1	TF:M10956_1	0.007413084430798255	2.1300010534839546	3370	438	102	19917	ZNF367,DDIAS,AURKA,MCM8,NUF2,CENPA,WEE1,SHCBP1,CEP55,FOXM1,TPX2,DSN1,CKS2,PRC1,NUSAP1,KIF11,ORC1,FANCD2,CCDC86,CENPK,ARHGAP11A,CHAF1A,OIP5,FKBP7,DEPDC1B,SMC4,SKA3,DTL,NCAPG,CDCA2,ESCO2,ESPL1,HMMR,PIM1,CEP135,POC1A,LMNB1,PARPBP,PRIM2,CDC45,ETNPPL,VKORC1,DAP3,POLR1H,MLX,DSCC1,HMGB2,POLQ,PPM1D,MND1,JPT1,CENPW,NDP,TRAIP,DEPDC1,C18ORF54,KNSTRN,EGLN3,DEK,TRIM26,DLGAP5,KBTBD11,UBALD2,MAD2L1,UFD1,MMP28,S…
TF	Factor: Elk-1; motif: NRCCGGAAGTN	TF:M11433	0.007423413628755153	2.129396340109959	7772	438	206	19917	DDIAS,AURKA,NRM,MCM8,ASF1B,NUF2,PKN3,SHCBP1,CDK2,CDK1,CDCA8,CEP55,KIF14,POLA2,TPX2,SGO1,CKS2,GTSE1,KIFC1,TGFB1I1,PIMREG,CHEK2,HJURP,MELK,AURKB,KIF4A,FANCD2,CENPK,ARHGAP11A,ERCC6L,IQGAP3,CDCA3,CCNB1,MYO1C,FKBP7,SKA1,PLK1,DEPDC1B,UBE2C,BUB1,NCAPG,CDCA5,MASTL,TRIP13,ESPL1,MGME1,RIOK1,CEP135,SNRPB,KIF23,POC1A,RAD51,PBK,BRIP1,ZDHHC5,NCAPD2,ECT2,KIF20B,PARPBP,LMNB2,PRIM2,C5ORF34,CDC45,CDC20,FANCI,CENPH…
TF	Factor: E2F-3; motif: NTTTTGGCGCCAAAAN	TF:M11527	0.007542175435310193	2.1225033698751052	6984	438	188	19917	ZNF367,DDIAS,HASPIN,MCM8,CENPA,WEE1,CDK2,NCAPH,CDCA8,CEP55,POLA2,KIF20A,CHST1,DSN1,KIFC1,TGFB1I1,NUSAP1,CHEK2,HJURP,KIF11,ORC1,FANCD2,NDC80,FANCC,TOP2A,CHAF1A,CHEK1,IQGAP3,PCOLCE,TROAP,MCM10,CCNA2,OIP5,MYO1C,FKBP7,SPC24,SMC4,UBE2C,SKA3,DTL,CDCA2,MASTL,MKI67,ESPL1,HMMR,PIM1,RAD51AP1,KIF23,KIF18A,POC1A,RAD51,ATAD2,PBK,ZDHHC5,CENPM,ECT2,RRM2,CENPN,E2F2,PRIM2,C5ORF34,CBFB,KNL1,CENPH,CENPL,FRMD8,SLC26…
TF	Factor: ATF-1; motif: NRTGACGTMAN; match class: 1	TF:M09592_1	0.007542175435310193	2.1225033698751052	1273	438	47	19917	ZNF367,AURKA,CKS2,PRC1,FANCD2,CCDC86,NDC80,CDCA3,MCM10,CCNA2,SKA1,CEP152,DTL,CDCA5,MASTL,MGME1,TTK,PBK,EXO1,CENPN,KNL1,POLR1H,CENPE,WDR62,PPM1D,SREBF1,MCM2,CENPW,DEPDC1,MLXIP,DAAM2,SIDT1,RFC3,LRRN4CL,MCAM,KIF15,DGCR6,C11ORF24,N4BP1,XRCC2,PINX1,H2BC15,CCDC77,CBX8,INTS7,SLC25A48,ISG20L2
TF	Factor: NFYA; motif: RRCCAATCAGN	TF:M09816	0.0076017577935823194	2.1190859719581745	2008	438	67	19917	ZNF367,DDIAS,AURKA,ASF1B,CDK1,NCAPH,KIF14,KIF20A,TPX2,CKS2,TGFB1I1,PIMREG,CHEK2,HJURP,MELK,ARHGAP11A,TOP2A,PLK1,DEPDC1B,DTL,BUB1,CDCA2,CDCA5,ESPL1,CENPF,HMGA1,KIF23,POC1A,ATAD2,TTK,ZDHHC5,CENPM,NCAPD2,ECT2,CDC45,TK1,CDC6,IGIP,TACC3,HMGB2,CDCA4,CDKN3,RACGAP1,DAXX,DEK,DLGAP5,UBALD2,UFD1,SLC1A4,CNOT1,E2F7,ORC6,CDC25A,CCNF,MTFR2,FAAP24,UBE2T,GABRG1,NCAPD3,ZNF90,LIX1,PRR11,NXT1,CBX8,INTS7,STIP1,NUP93
TF	Factor: ATF-2; motif: NNTGACGTMANN; match class: 1	TF:M11307_1	0.007649109691218715	2.116389111080659	1971	438	66	19917	ZNF367,AURKA,PRC1,AURKB,ASPM,FANCD2,CCDC86,CENPK,NDC80,CHAF1A,PCOLCE,MCM10,CCNA2,DTL,MASTL,MGME1,SNRPB,TTK,PBK,EXO1,LMNB1,CENPN,C5ORF34,CENPH,SGO2,POLR1H,CCND1,CENPE,PPM1D,SREBF1,ACOX2,CENPW,MCM3,EIF4A1,DEPDC1,MLXIP,DAAM2,RAD18,TRIM26,DLGAP5,SIDT1,RFC3,BRCA1,CFAP20,DDX19B,MCAM,KIF15,IGFN1,DGCR6,C11ORF24,POLR3D,N4BP1,XRCC2,VMP1,DESI2,MSH6,PINX1,TMEM45A,FSTL5,H2BC15,CCDC77,PRIM1,CBX8,INTS7,SLC25A48…
TF	Factor: RUNX2; motif: NRACCGCAAACCGCAN	TF:M04106	0.007649109691218715	2.116389111080659	13969	438	339	19917	ZNF367,DDIAS,AURKA,HASPIN,MCM8,ASF1B,NUF2,PTTG1,TP53I3,CENPA,WEE1,PKN3,SHCBP1,CDK1,NCAPH,CDCA8,FOXM1,POLA2,KIF20A,TPX2,CHST1,DSN1,SGO1,CKS2,GTSE1,PRC1,PIMREG,NUSAP1,KIF2C,MELK,ORC1,AURKB,ASPM,SFRP2,FANCD2,NDC80,FANCC,RASL10A,TOP2A,CHAF1A,CHEK1,PCOLCE,TROAP,CDC25C,CDCA3,CCNB1,MCM10,CCNA2,GAS1,OIP5,MYO1C,FKBP7,SKA1,PLK1,CEP152,SPC24,ZWINT,DEPDC1B,UBE2C,SKA3,DTL,BUB1,NCAPG,CDCA2,CDCA5,MASTL,MYBL2,ML…
TF	Factor: CREM; motif: NNTGACGTCANN; match class: 1	TF:M11225_1	0.007694491352217982	2.113820084114016	2507	438	80	19917	ZNF367,AURKA,FOXM1,SGO1,PRC1,AURKB,ASPM,FANCD2,CCDC86,CENPK,NDC80,CHAF1A,ERCC6L,PCOLCE,MCM10,CCNA2,DTL,MASTL,MGME1,SNRPB,TTK,PBK,EXO1,LMNB1,CENPN,PARPBP,C5ORF34,CENPH,SGO2,POLR1H,CCND1,CENPE,WDR62,PPM1D,SREBF1,MCM2,ACOX2,CENPW,MCM3,EIF4A1,DEPDC1,MLXIP,DAAM2,RAD18,TRIM26,DLGAP5,SIDT1,RFC3,EME1,BRCA1,CFAP20,ORAI1,DDX19B,MCAM,KIF15,IGFN1,DGCR6,C11ORF24,NUP188,POLR3D,N4BP1,XRCC2,FEN1,PLAT,SPOCD1,VMP1…
TF	Factor: ATF-3; motif: GGCGCSSNSNGRTSACGTSA; match class: 1	TF:M04744_1	0.007807064691316749	2.1075122219462528	4937	438	140	19917	ZNF367,NRM,CENPA,WEE1,SHCBP1,NCAPH,CEP55,FOXM1,DSN1,SGO1,CKS2,PRC1,AURKB,ASPM,FANCD2,CCDC86,CENPK,NDC80,TOP2A,CHAF1A,ERCC6L,PCOLCE,MCM10,CCNA2,SPC24,DEPDC1B,CDCA2,CDCA5,MASTL,TRIP13,ESPL1,MGME1,RIOK1,CEP135,SNRPB,KIF18A,RAD51,EXO1,ZPR1,LMNB1,CENPN,PARPBP,CENPH,FRMD8,CDC6,SGO2,TIMELESS,ETNPPL,VKORC1,POLR1H,MLX,CENPE,IKBIP,WDR62,ZWILCH,REXO5,PPM1D,SREBF1,MCM2,CENPW,EIF4A1,RFC2,DEPDC1,C18ORF54,MLXIP…
TF	Factor: CREB1; motif: NRRTGACGTMA; match class: 1	TF:M09887_1	0.007807064691316749	2.1075122219462528	1638	438	57	19917	ZNF367,AURKA,SHCBP1,DSN1,SGO1,CKS2,PRC1,FANCD2,CCDC86,NDC80,CHAF1A,CHEK1,MCM10,CCNA2,SKA1,DTL,CDCA5,MASTL,MGME1,RIOK1,TTK,PBK,EXO1,CENPN,SGO2,POLR1H,CENPE,WDR62,PPM1D,SREBF1,MCM2,CENPW,DEPDC1,MLXIP,DAAM2,TRIM26,NIP7,HAUS8,RFC3,MCAM,BRCA2,KIF15,DGCR6,C11ORF24,UBE2T,B4GALT3,N4BP1,XRCC2,CDC25B,PINX1,FSTL5,H2BC15,CCDC77,CBX8,INTS7,ISG20L2,WDR53
TF	Factor: E2F-4; motif: TTTGGCGCCAAA	TF:M04519	0.007847084283938745	2.1052916826968833	4896	438	139	19917	HASPIN,CENPA,WEE1,CDK2,CDK1,KIF14,POLA2,KIF20A,GTSE1,TGFB1I1,NUSAP1,CHEK2,ORC1,KIF4A,FANCD2,CCDC86,CENPK,NDC80,CHAF1A,CHEK1,IQGAP3,TROAP,MCM10,CCNA2,OIP5,MYO1C,PLK1,CEP152,SPC24,SMC4,SKA3,DTL,MYBL2,MKI67,HMMR,PIM1,KIF18A,POC1A,RAD51,CKAP2L,ATAD2,PBK,CENPM,LMNB1,ECT2,RRM2,KIF20B,E2F2,PRIM2,KNL1,CDC6,ZYX,DAP3,CCND1,SF3B3,IKBIP,ALDH2,KLF10,WDR62,NKIRAS2,BORA,PPM1D,MCM2,ARHGEF39,MND1,NR2C2AP,MCM5,WDR…
TF	Factor: c-Ets-2; motif: NCCGGAAGTG; match class: 1	TF:M08759_1	0.008106701789263532	2.091155802517366	2943	438	91	19917	HASPIN,MCM8,ASF1B,NUF2,KIF14,TPX2,SGO1,CKS2,KIFC1,TGFB1I1,FANCD2,SKA1,DEPDC1B,CDCA5,MASTL,TRIP13,RIOK1,CEP135,SNRPB,KIF23,RAD51,NCAPD2,ZPR1,PARPBP,PRIM2,FANCI,SLC26A2,CDC6,ZYX,MLX,IKBIP,REXO5,CKS1B,MCM2,MCM3,EIF4A1,RFC2,TRAIP,KNSTRN,A2ML1,DAXX,NIP7,EDEM2,KBTBD11,SIDT1,CD93,MAD2L1,PMM2,PFN1,EME1,E2F7,USB1,SERPINH1,DNMT1,FANCB,ITPRID2,TRMT6,BRCA2,FBXO5,MTFR2,GLE1,DPP9,C11ORF24,FAAP24,SPINDOC,POLR3D…
TF	Factor: Pax-5; motif: NGTCACGCWTSANTGMNY	TF:M04064	0.008155341238354149	2.0885578623571566	10224	438	260	19917	ZNF367,AURKA,NRM,HASPIN,MCM8,NUF2,CENPA,PKN3,SHCBP1,NCAPH,CDCA8,FOXM1,KIF14,CCNB2,POLA2,TPX2,DSN1,CKS2,KIFC1,TGFB1I1,PRC1,NUSAP1,HJURP,KIF11,MELK,AURKB,SFRP2,FANCD2,NDC80,RASL10A,TOP2A,CHEK1,TROAP,CDC25C,CDCA3,CCNA2,GAS1,OIP5,NTSR2,FKBP7,WDR76,CEP152,SPC24,DEPDC1B,SMC4,SKA3,NCAPG,CDCA2,MASTL,TRIP13,ESCO2,ESPL1,HMMR,MGME1,CENPF,HMGA1,KIF23,KIF18A,POC1A,RAD51,CKAP2L,PBK,EXO1,BRIP1,CENPM,NCAPD2,ZPR1…
TF	Factor: PEA3; motif: NACCGGAAGTN	TF:M11428	0.008181098529179642	2.0871883768752744	7260	438	194	19917	DDIAS,AURKA,NRM,MCM8,ASF1B,CENPA,WEE1,PKN3,SHCBP1,CDK2,CEP55,KIF14,TPX2,SGO1,CKS2,GTSE1,KIFC1,TGFB1I1,PIMREG,HJURP,MELK,AURKB,KIF4A,FANCD2,ARHGAP11A,ERCC6L,CHEK1,CDCA3,CCNB1,MYO1C,SKA1,PLK1,DEPDC1B,UBE2C,NCAPG,CDCA2,CDCA5,MASTL,MLC1,TRIP13,ESPL1,MGME1,RIOK1,CEP135,SNRPB,KIF23,POC1A,RAD51,TTK,ZDHHC5,NCAPD2,ECT2,RRM2,KIF20B,PARPBP,LMNB2,PRIM2,C5ORF34,CDC45,CDC20,FANCI,SLC26A2,CDC6,ZYX,ETNPPL,MLX,SF…
TF	Factor: E2F-3:FOXI1; motif: NGACACCGCGCCCAC; match class: 1	TF:M08208_1	0.008332975192534528	2.07919991107743	7175	438	192	19917	DDIAS,NRM,PTTG1,WEE1,PKN3,CDCA8,CEP55,FOXM1,KIF14,TPX2,CHST1,DSN1,GTSE1,PRC1,NUSAP1,BIRC5,KIF11,MELK,AURKB,KIF4A,SFRP2,RASL10A,ERCC6L,CHEK1,IQGAP3,MCM10,NTSR2,MYO1C,WDR76,PLK1,SPC24,ZWINT,CDCA2,MASTL,MYBL2,TRIP13,ESPL1,PIM1,RIOK1,CEP135,HMGA1,KIF23,POC1A,RAD51,CKAP2L,CENPM,NCAPD2,LMNB1,CENPN,PARPBP,E2F2,LMNB2,CDC45,CBFB,FANCI,CENPH,FRMD8,SLC26A2,CAV1,ZYX,VKORC1,SF3B3,IKBIP,ALDH2,KLF10,NKIRAS2,DSC…
TF	Factor: ELK1; motif: NACTTCCGSCGGAAGYN; match class: 1	TF:M03971_1	0.008391136204460227	2.076179229407511	7220	438	193	19917	DDIAS,AURKA,ASF1B,TP53I3,CENPA,WEE1,NCAPH,CDCA8,CHST1,SGO1,TGFB1I1,PRC1,PIMREG,NUSAP1,KIF2C,CHEK2,HJURP,KIF11,MELK,ORC1,AURKB,NDC80,FANCC,ARHGAP11A,ERCC6L,CHEK1,PCOLCE,CCNB1,GAS1,OIP5,MYO1C,SKA1,WDR76,PLK1,CEP152,SKA3,DTL,NCAPG,CDCA5,MASTL,MYBL2,MKI67,TRIP13,ESPL1,CENPF,RIOK1,HMGA1,RAD51AP1,KIF23,KIF18A,POC1A,CKAP2L,ATAD2,NCAPD2,ZPR1,LMNB1,RRM2,E2F2,LMNB2,CDC20,KNL1,FANCI,CENPL,TIMELESS,ZYX,VKORC…
TF	Factor: E2F-3; motif: NTTTTGGCGCCAAAAN	TF:M11526	0.008926009241353432	2.0493426678577205	7228	438	193	19917	DDIAS,HASPIN,MCM8,CENPA,WEE1,CDK2,NCAPH,CDCA8,CEP55,POLA2,KIF20A,TPX2,DSN1,TGFB1I1,NUSAP1,CHEK2,KIF11,ORC1,AURKB,KIF4A,CCDC86,NDC80,CHAF1A,CHEK1,IQGAP3,PCOLCE,TROAP,MCM10,CCNA2,OIP5,MYO1C,FKBP7,PLK1,SPC24,SMC4,UBE2C,SKA3,DTL,CDCA2,MASTL,MKI67,ESPL1,HMMR,PIM1,RAD51AP1,KIF18A,POC1A,ATAD2,PBK,ZDHHC5,CENPM,NCAPD2,ECT2,RRM2,E2F2,PRIM2,C5ORF34,CBFB,KNL1,CENPH,CENPL,FRMD8,SLC26A2,CDC6,SGO2,TIMELESS,ZYX,…
TF	Factor: pax-6; motif: NYACGCNTSANYGCNYN	TF:M11881	0.00893623398851891	2.0488454680714803	13307	438	325	19917	ZNF367,DDIAS,AURKA,NRM,HASPIN,MCM8,ASF1B,PTTG1,TP53I3,WEE1,PKN3,CDK1,NCAPH,CDCA8,FOXM1,KIF14,CCNB2,POLA2,CHST1,DSN1,CKS2,GTSE1,KIFC1,TGFB1I1,PIMREG,NUSAP1,KIF2C,CHEK2,HJURP,KIF11,MELK,AURKB,ASPM,SFRP2,CCDC86,CENPK,RASL10A,TOP2A,ERCC6L,CHEK1,IQGAP3,PCOLCE,CDCA3,CCNB1,CCNA2,GAS1,OIP5,NTSR2,MYO1C,FKBP7,SKA1,WDR76,CEP152,SPC24,DEPDC1B,SKA3,CDCA2,CDCA5,MASTL,MYBL2,MLC1,MKI67,TRIP13,ESCO2,ESPL1,HMMR,MG…
TF	Factor: GABP-alpha; motif: AACCGGAAR	TF:M04748	0.008988578618388405	2.046308978677818	16173	438	382	19917	ZNF367,AURKA,NRM,HASPIN,MCM8,ASF1B,NUF2,PTTG1,TP53I3,CENPA,WEE1,PKN3,SHCBP1,CDK2,CDK1,CDCA8,CEP55,FOXM1,KIF14,CCNB2,POLA2,KIF20A,TPX2,DSN1,SGO1,CKS2,GTSE1,KIFC1,TGFB1I1,PRC1,NUSAP1,KIF2C,BIRC5,CHEK2,HJURP,KIF11,MELK,ORC1,ASPM,KIF4A,SFRP2,FANCD2,CCDC86,CENPK,NDC80,FANCC,RASL10A,ARHGAP11A,TOP2A,CHAF1A,ERCC6L,CHEK1,IQGAP3,PCOLCE,TROAP,CDC25C,CDCA3,CCNB1,MCM10,CCNA2,GAS1,OIP5,NTSR2,FKBP7,SKA1,PLK1,CE…
TF	Factor: Erg; motif: NACCGGAWWTCCGGTN; match class: 1	TF:M11395_1	0.0091699137561797	2.037634748887382	8027	438	211	19917	ASF1B,NUF2,CENPA,WEE1,PKN3,FOXM1,KIF14,KIF20A,TPX2,CHST1,CKS2,GTSE1,KIFC1,PIMREG,ASPM,KIF4A,SFRP2,RASL10A,TOP2A,CHEK1,PCOLCE,TROAP,CDCA3,CCNB1,CCNA2,GAS1,MYO1C,WDR76,PLK1,DEPDC1B,SMC4,SKA3,DTL,NCAPG,CDCA5,MASTL,MYBL2,TRIP13,HMMR,PIM1,RIOK1,SNRPB,KIF23,KIF18A,CKAP2L,ATAD2,TTK,PBK,ZDHHC5,ZPR1,PCNA,E2F2,PRIM2,C5ORF34,CDC45,CBFB,CDC20,KNL1,CENPH,FRMD8,SLC26A2,TK1,CDC6,TIMELESS,DAP3,POLR1H,SF3B3,KLF10…
TF	Factor: ATF-3; motif: GGCGCSSNSNGRTSACGTSA	TF:M04744	0.0091699137561797	2.037634748887382	10196	438	259	19917	ZNF367,AURKA,NRM,HASPIN,MCM8,CENPA,WEE1,SHCBP1,CDK2,NCAPH,CEP55,FOXM1,KIF14,POLA2,DSN1,SGO1,CKS2,GTSE1,KIFC1,PRC1,KIF2C,BIRC5,HJURP,MELK,ORC1,AURKB,ASPM,FANCD2,CCDC86,CENPK,NDC80,FANCC,TOP2A,CHAF1A,ERCC6L,CHEK1,PCOLCE,CDC25C,CDCA3,CCNB1,MCM10,CCNA2,NTSR2,PLK1,SPC24,ZWINT,DEPDC1B,SMC4,UBE2C,SKA3,DTL,NCAPG,CDCA2,CDCA5,MASTL,MYBL2,TRIP13,ESPL1,HMMR,MGME1,PIM1,RIOK1,CEP135,HMGA1,SNRPB,KIF18A,RAD51,TT…
TF	Factor: FEV; motif: ACCGGAAGTN	TF:M03987	0.009294776570086774	2.0317610454342736	1324	438	48	19917	DDIAS,TPX2,KIFC1,FANCD2,NCAPG,SNRPB,KIF23,ZDHHC5,NCAPD2,LMNB2,C5ORF34,CDC45,SF3B3,NKIRAS2,REXO5,RFWD3,CKS1B,POLQ,ARHGEF39,TRAIP,RACGAP1,KNSTRN,DAXX,RAD18,EDEM2,RTKN2,BFAR,MAD2L1,UFD1,PMM2,EME1,ORAI1,DNMT1,PAK1IP1,CORO1C,C11ORF24,KMT5A,TBC1D31,NCAPD3,VMP1,MDH2,PRPF4,CARHSP1,RFC4,CCDC77,EIF5A,CBX8,GINS2
TF	Factor: LHX4; motif: NNCRTTAN; match class: 1	TF:M11005_1	0.009315607177810098	2.030788833158648	4253	438	123	19917	ZNF367,DDIAS,AURKA,MCM8,NUF2,CENPA,WEE1,SHCBP1,NCAPH,CEP55,FOXM1,TPX2,DSN1,SGO1,CKS2,GTSE1,PRC1,NUSAP1,KIF11,ORC1,FANCD2,CCDC86,CENPK,ARHGAP11A,CHAF1A,ERCC6L,OIP5,FKBP7,SPC24,DEPDC1B,SMC4,SKA3,DTL,NCAPG,CDCA2,ESCO2,ESPL1,HMMR,PIM1,CEP135,SNRPB,POC1A,LMNB1,PARPBP,PRIM2,CDC45,ETNPPL,VKORC1,DAP3,KPNA2,POLR1H,MLX,IKBIP,DSCC1,HMGB2,POLQ,PPM1D,MND1,JPT1,CENPW,MCM3,NDP,TRAIP,DEPDC1,C18ORF54,KNSTRN,EGLN3…
TF	Factor: Elf-1; motif: ACTTCCGGG; match class: 1	TF:M04714_1	0.009464146540632556	2.0239185438138345	2684	438	84	19917	HASPIN,MCM8,ASF1B,CKS2,KIFC1,TGFB1I1,FANCD2,FANCC,MYO1C,PLK1,DEPDC1B,CDCA5,MASTL,TRIP13,RIOK1,SNRPB,KIF23,ZDHHC5,NCAPD2,ZPR1,PARPBP,PRIM2,CDC20,FANCI,SLC26A2,ZYX,BORA,RPIA,REXO5,RFWD3,CKS1B,EIF4A1,MCM5,RFC2,TRAIP,KNSTRN,A2ML1,DAXX,DIAPH1,NIP7,EDEM2,KBTBD11,CD93,MAD2L1,PMM2,PFN1,EME1,E2F7,ZSCAN16,USB1,SERPINH1,DNMT1,FANCB,ITPRID2,TRMT6,BRCA2,FBXO5,MTFR2,DPP9,EZH2,C11ORF24,FAAP24,SPINDOC,HAUS1,POLR…
TF	Factor: E2F-3; motif: GGCGGGN; match class: 1	TF:M02089_1	0.009464146540632556	2.0239185438138345	9425	438	242	19917	ZNF367,DDIAS,NRM,MCM8,ASF1B,PTTG1,CENPA,WEE1,PKN3,CDCA8,CEP55,FOXM1,CHST1,DSN1,KIFC1,PRC1,PIMREG,NUSAP1,KIF2C,CHEK2,KIF11,MELK,ORC1,ASPM,CCDC86,FANCC,ARHGAP11A,ERCC6L,CHEK1,CDC25C,CDCA3,CCNA2,GAS1,OIP5,MYO1C,FKBP7,SKA1,WDR76,SMC4,DTL,BUB1,NCAPG,CDCA2,MASTL,MYBL2,MKI67,TRIP13,ESCO2,HMMR,MGME1,PIM1,CEP135,HMGA1,SNRPB,KIF23,POC1A,CKAP2L,PBK,CENPM,NCAPD2,ZPR1,LMNB1,PCNA,RRM2,ALDOC,LMNB2,CDC45,CBFB,CD…
TF	Factor: Net; motif: ACCGGAARTN	TF:M02060	0.009683350172155363	2.01397436277805	577	438	26	19917	TPX2,KIFC1,DEPDC1B,SNRPB,ZDHHC5,CDC45,SF3B3,NKIRAS2,REXO5,CKS1B,KNSTRN,DAXX,NIP7,BFAR,UFD1,EME1,DNMT1,KMT5A,TBC1D31,NCAPD3,VMP1,MDH2,RFC4,EIF5A,RCC1,GINS2
TF	Factor: Elk-1:OC-2; motif: RCCGGAASCGATCGATNN; match class: 1	TF:M08223_1	0.009812935286412456	2.0082010651976105	5900	438	162	19917	DDIAS,AURKA,MCM8,TP53I3,CENPA,CDK2,NCAPH,POLA2,SGO1,CKS2,KIFC1,HJURP,ASPM,KIF4A,SFRP2,CCDC86,RASL10A,TOP2A,CHAF1A,ERCC6L,CHEK1,CCNB1,MCM10,CCNA2,SMC4,SKA3,BUB1,NCAPG,CDCA5,MASTL,TRIP13,ESPL1,HMMR,RAD51AP1,KIF23,KIF18A,POC1A,RAD51,NCAPD2,ZPR1,LMNB1,RRM2,KIF20B,ALDOC,CENPN,LMNB2,CDC45,CDC20,PON1,CENPH,GEMIN6,SLC26A2,ZYX,VKORC1,DAP3,MLX,SF3B3,IKBIP,WDR62,NKIRAS2,DSCC1,REXO5,RFWD3,TACC3,CKS1B,HMGB2,P…
TF	Factor: E2F-1; motif: TTGGCGCGRAANNGNM	TF:M00938	0.009867613390701756	2.0057878743397812	7376	438	196	19917	ZNF367,NRM,WEE1,PKN3,SHCBP1,CDK1,NCAPH,FOXM1,POLA2,KIF20A,TPX2,CHST1,DSN1,PIMREG,NUSAP1,KIF2C,CHEK2,KIF11,MELK,ORC1,KIF4A,SFRP2,FANCC,RASL10A,ARHGAP11A,TOP2A,CHAF1A,CHEK1,PCOLCE,CDCA3,MCM10,OIP5,MYO1C,SPC24,ZWINT,DEPDC1B,SKA3,DTL,CDCA5,MASTL,MYBL2,MKI67,ESPL1,CENPF,PIM1,HMGA1,KIF18A,POC1A,RAD51,ATAD2,EXO1,BRIP1,ZDHHC5,CENPM,LMNB1,PCNA,RRM2,E2F2,LMNB2,CDC20,SLC26A2,CDC6,DAP3,MLX,CCND1,SF3B3,KLF10,…
TF	Factor: Elf-1; motif: NNANCCGGAAGTGS	TF:M09900	0.009924709880693532	2.0032821796837843	5264	438	147	19917	ZNF367,DDIAS,AURKA,MCM8,ASF1B,NUF2,PKN3,CDK2,CEP55,KIF14,TPX2,SGO1,CKS2,GTSE1,KIFC1,PIMREG,MELK,AURKB,KIF4A,FANCD2,FANCC,TROAP,MYO1C,WDR76,UBE2C,NCAPG,CDCA5,MASTL,TRIP13,RIOK1,SNRPB,KIF23,POC1A,RAD51,TTK,ZDHHC5,NCAPD2,PARPBP,LMNB2,PRIM2,C5ORF34,CDC45,CDC20,FANCI,ETNPPL,MLX,SF3B3,IKBIP,NKIRAS2,RPIA,REXO5,RFWD3,TACC3,TONSL,CKS1B,POLQ,ARHGEF39,FBLIM1,MCM5,RFC2,TRAIP,KNTC1,RACGAP1,KNSTRN,DAXX,DIAPH1,…
TF	Factor: ATF-2; motif: NRTGACGTMANN	TF:M11309	0.010175104813820142	1.9924611084094486	6509	438	176	19917	ZNF367,DDIAS,AURKA,NUF2,CENPA,SHCBP1,CDK2,CDK1,NCAPH,CEP55,KIF20A,DSN1,SGO1,CKS2,KIFC1,PRC1,KIF2C,MELK,ORC1,AURKB,ASPM,FANCD2,CCDC86,CENPK,NDC80,FANCC,TOP2A,CHAF1A,CHEK1,IQGAP3,PCOLCE,CDC25C,MCM10,CCNA2,SKA1,CEP152,SPC24,DEPDC1B,SMC4,SKA3,DTL,CDCA2,CDCA5,MASTL,MYBL2,TRIP13,ESCO2,HMMR,MGME1,PIM1,RIOK1,SNRPB,KIF18A,TTK,PBK,EXO1,NCAPD2,LMNB1,KIF20B,CENPN,PARPBP,C5ORF34,KNL1,CENPH,SGO2,IGIP,CAV1,DAP3…
TF	Factor: c-Ets-2; motif: NACCGGAAGYRCTTCCGGTN; match class: 1	TF:M11417_1	0.010175104813820142	1.9924611084094486	14160	438	342	19917	ZNF367,AURKA,HASPIN,MCM8,ASF1B,NUF2,CENPA,WEE1,PKN3,CDK2,CDK1,CDCA8,CEP55,FOXM1,KIF14,POLA2,TPX2,CHST1,DSN1,SGO1,CKS2,GTSE1,KIFC1,TGFB1I1,PRC1,PIMREG,KIF2C,BIRC5,CHEK2,HJURP,KIF11,MELK,ORC1,ASPM,KIF4A,FANCC,ARHGAP11A,TOP2A,CHAF1A,ERCC6L,CHEK1,IQGAP3,CDCA3,CCNB1,MCM10,CCNA2,GAS1,NTSR2,MYO1C,FKBP7,SKA1,WDR76,PLK1,CEP152,DEPDC1B,SMC4,UBE2C,SKA3,BUB1,NCAPG,CDCA2,CDCA5,MASTL,MYBL2,MLC1,TRIP13,ESCO2,ES…
TF	Factor: Sp1; motif: NWRGCCACGCCCMCN	TF:M12152	0.010175104813820142	1.9924611084094486	7381	438	196	19917	ZNF367,NRM,PTTG1,WEE1,CDK2,CDCA8,CHST1,DSN1,CKS2,GTSE1,TGFB1I1,PRC1,NUSAP1,HJURP,KIF11,ORC1,FANCC,TOP2A,CHAF1A,ERCC6L,CHEK1,PCOLCE,CDC25C,CDCA3,CCNB1,OIP5,NTSR2,FKBP7,PLK1,SKA3,DTL,CDCA2,CDCA5,MYBL2,MKI67,ESCO2,ESPL1,PIM1,HMGA1,KIF23,KIF18A,POC1A,RAD51,CKAP2L,NCAPD2,ZPR1,LMNB1,PCNA,RRM2,ALDOC,LMNB2,CDC45,CENPH,FRMD8,TIMELESS,VKORC1,CENPE,IKBIP,ALDH2,BUB1B,KLF10,WDR62,ZWILCH,NKIRAS2,BORA,RPIA,REXO…
TF	Factor: ER81; motif: NNNGRCMGGAAGYRNNNNNNNS	TF:M09611	0.010175104813820142	1.9924611084094486	2692	438	84	19917	AURKA,NRM,SHCBP1,CDK2,CHST1,CKS2,KIFC1,TGFB1I1,MELK,KIF4A,FANCD2,GAS1,MYO1C,NCAPG,TRIP13,ESPL1,HMGA1,KIF23,POC1A,ZDHHC5,NCAPD2,CENPN,CDC45,CDC20,MLX,SF3B3,REXO5,RFWD3,TACC3,CKS1B,HPSE2,POLQ,SREBF1,EIF4A1,MCM5,RFC2,TRAIP,C18ORF54,KNTC1,RNASEH2A,NIP7,EDEM2,HAUS8,RTKN2,KBTBD11,ABT1,MAD2L1,UFD1,PFN1,EME1,E2F7,ZSCAN16,USB1,ORAI1,DDX19B,DNMT1,ITPRID2,PAK1IP1,IGFN1,TEAD4,BZW2,DPP9,CORO1C,BTG3,C11ORF24,S…
TF	Factor: Elk-1:Pax-5; motif: ACCGGAACYACGCWTSANYG	TF:M08225	0.010238485004235093	1.989764301463448	14162	438	342	19917	ZNF367,DDIAS,HASPIN,MCM8,ASF1B,NUF2,PTTG1,TP53I3,CENPA,WEE1,PKN3,SHCBP1,CDK2,CDCA8,FOXM1,KIF14,CCNB2,POLA2,KIF20A,TPX2,CHST1,DSN1,SGO1,CKS2,GTSE1,KIFC1,PRC1,PIMREG,KIF2C,BIRC5,CHEK2,HJURP,KIF11,MELK,ORC1,AURKB,ASPM,KIF4A,SFRP2,FANCD2,CENPK,NDC80,FANCC,RASL10A,ARHGAP11A,TOP2A,CHAF1A,ERCC6L,CHEK1,IQGAP3,CDCA3,MCM10,CCNA2,GAS1,NTSR2,MYO1C,FKBP7,SKA1,WDR76,PLK1,SPC24,ZWINT,DEPDC1B,SMC4,SKA3,DTL,NCAPG…
TF	Factor: ETV4; motif: ACCGGAAGTN	TF:M03982	0.010365716384379171	1.9844006780340289	6903	438	185	19917	DDIAS,AURKA,NRM,MCM8,ASF1B,CENPA,WEE1,PKN3,SHCBP1,CDK2,CEP55,KIF14,TPX2,CKS2,GTSE1,KIFC1,TGFB1I1,PIMREG,HJURP,MELK,AURKB,KIF4A,FANCD2,ARHGAP11A,ERCC6L,CDCA3,CCNB1,MYO1C,SKA1,PLK1,DEPDC1B,SMC4,UBE2C,NCAPG,CDCA2,CDCA5,MASTL,TRIP13,ESPL1,MGME1,RIOK1,CEP135,SNRPB,KIF23,POC1A,RAD51,TTK,ZDHHC5,NCAPD2,RRM2,KIF20B,PARPBP,LMNB2,PRIM2,C5ORF34,CDC45,CDC20,FANCI,SLC26A2,ZYX,ETNPPL,POLR1H,MLX,SF3B3,IKBIP,NKIR…
TF	Factor: Erg; motif: NACCGGAARYN; match class: 1	TF:M11392_1	0.010712194087440546	1.9701215672188983	3253	438	98	19917	MCM8,ASF1B,TP53I3,WEE1,KIF14,CKS2,KIFC1,TGFB1I1,ARHGAP11A,ERCC6L,PLK1,DEPDC1B,SMC4,CDCA5,MASTL,TRIP13,RIOK1,SNRPB,KIF18A,RAD51,ZDHHC5,NCAPD2,LMNB1,E2F2,CDC20,FANCI,CENPL,SLC26A2,ZYX,MLX,SF3B3,DSCC1,RPIA,REXO5,RFWD3,TACC3,CKS1B,MCM5,RFC2,C18ORF54,RACGAP1,DAXX,RAD18,DEK,WDHD1,NIP7,EDEM2,KBTBD11,ABT1,CD93,CCDC15,MAD2L1,PMM2,PFN1,EME1,E2F7,ZSCAN16,USB1,SERPINH1,KDM4D,DNMT1,FANCB,CAPN5,PAK1IP1,TRMT6,G…
TF	Factor: ATF; motif: CNSTGACGTNNNYC	TF:M00017	0.01083297608447651	1.9652522156268284	7303	438	194	19917	ZNF367,DDIAS,AURKA,NUF2,CENPA,SHCBP1,CDK2,CDK1,NCAPH,CEP55,KIF20A,DSN1,SGO1,CKS2,KIFC1,PRC1,NUSAP1,KIF2C,MELK,ORC1,AURKB,ASPM,FANCD2,CCDC86,CENPK,NDC80,FANCC,TOP2A,CHAF1A,CHEK1,PCOLCE,MCM10,CCNA2,OIP5,MYO1C,WDR76,SPC24,DEPDC1B,SMC4,UBE2C,DTL,BUB1,CDCA2,CDCA5,MASTL,MYBL2,MKI67,TRIP13,MGME1,PIM1,RIOK1,SNRPB,KIF23,CKAP2L,TTK,PBK,EXO1,NCAPD2,ZPR1,PCNA,CENPN,PRIM2,C5ORF34,CENPH,SGO2,IGIP,CAV1,DAP3,POL…
TF	Factor: pax-6; motif: NYACGCNTSANYGCNYN; match class: 1	TF:M11881_1	0.010868305477203084	1.9638381632980204	7216	438	192	19917	NRM,HASPIN,MCM8,ASF1B,WEE1,NCAPH,FOXM1,KIF14,POLA2,DSN1,PIMREG,KIF2C,CHEK2,KIF11,MELK,AURKB,SFRP2,CENPK,RASL10A,ERCC6L,IQGAP3,PCOLCE,CDCA3,CCNA2,GAS1,NTSR2,MYO1C,WDR76,DEPDC1B,SKA3,CDCA2,MASTL,MYBL2,MLC1,MKI67,TRIP13,ESCO2,ESPL1,HMMR,CENPF,RAD51,EXO1,CENPM,NCAPD2,PCNA,ECT2,RRM2,KIF20B,PRIM2,CBFB,CDC20,KNL1,CDC6,VKORC1,DAP3,KPNA2,MLX,SF3B3,ALDH2,KLF10,WDR62,BORA,RFWD3,HPSE2,PPM1D,SREBF1,MCM2,MND1,…
TF	Factor: SP2; motif: GGGCGGGAC	TF:M01783	0.010909216420518902	1.9622064424882895	9222	438	237	19917	ZNF367,NRM,MCM8,NUF2,TP53I3,SHCBP1,CDK2,CDCA8,CEP55,FOXM1,DSN1,SGO1,CKS2,KIFC1,TGFB1I1,PIMREG,NUSAP1,CHEK2,KIF11,ORC1,KIF4A,CCDC86,NDC80,FANCC,TOP2A,ERCC6L,CHEK1,PCOLCE,CDC25C,CCNB1,CCNA2,GAS1,OIP5,MYO1C,FKBP7,SPC24,SMC4,NCAPG,CDCA2,CDCA5,MASTL,MYBL2,MKI67,TRIP13,ESCO2,PIM1,RIOK1,HMGA1,KIF23,KIF18A,POC1A,CKAP2L,ATAD2,EXO1,ZDHHC5,CENPM,NCAPD2,ZPR1,PCNA,RRM2,ALDOC,CENPN,LMNB2,C5ORF34,CDC45,CDC20,KN…
TF	Factor: ELK4; motif: NCRCTTCCGGN	TF:M07209	0.011321579225698026	1.946092990005502	1125	438	42	19917	AURKA,KIF14,KIFC1,FANCD2,MYO1C,NCAPG,SNRPB,KIF23,ZDHHC5,LMNB2,CDC45,SF3B3,NKIRAS2,REXO5,RFWD3,CKS1B,ARHGEF39,TRAIP,RAD18,EDEM2,RTKN2,DLGAP5,UFD1,PFN1,EME1,ZSCAN16,ORAI1,DNMT1,PAK1IP1,DPP9,CORO1C,C11ORF24,TBC1D31,VMP1,MDH2,UTP4,CARHSP1,RFC4,ZSCAN9,EIF5A,CBX8,ODF2
TF	Factor: NF-YC; motif: NRGCCAATYAGMGC	TF:M02107	0.011321579225698026	1.946092990005502	1020	438	39	19917	ASF1B,CDK1,CCNB2,TPX2,CKS2,CHEK2,HJURP,CDCA3,PLK1,ZWINT,DEPDC1B,DTL,CDCA2,ESPL1,KIF23,POC1A,ATAD2,ZDHHC5,TK1,CDC6,RFWD3,TACC3,NEK2,CDCA4,MGAT4C,DEK,DLGAP5,UBALD2,E2F7,ORC6,CCNF,FAAP24,ZNF90,ADCYAP1R1,PINX1,PRR11,CBX8,INTS7,STIP1
TF	Factor: Erm; motif: NNSCGGAWGYN; match class: 1	TF:M11424_1	0.011321579225698026	1.946092990005502	2861	438	88	19917	MCM8,ASF1B,KIF14,SGO1,CKS2,KIFC1,TGFB1I1,HJURP,MELK,ORC1,FANCD2,FANCC,ARHGAP11A,PLK1,CDCA5,MASTL,MGME1,RIOK1,SNRPB,KIF23,RAD51,ZDHHC5,NCAPD2,ZPR1,RRM2,KIF20B,PRIM2,CDC20,FANCI,SLC26A2,ZYX,MLX,SF3B3,NKIRAS2,DSCC1,REXO5,CKS1B,MND1,EIF4A1,RFC2,KNSTRN,DIAPH1,EDEM2,HAUS8,CD93,MAD2L1,PMM2,PFN1,EME1,E2F7,ZSCAN16,USB1,SERPINH1,KDM4D,PLSCR3,DNMT1,FANCB,TRMT6,BRCA2,FBXO5,MTFR2,DPP9,EZH2,C11ORF24,FAAP24,POL…
[truncated: 810 more rows]
