# Supplementary material for: Machine Learning-Based Analysis of Glioma Grades Reveals Co-Enrichment
Source: Cancers (Basel). 2022 Feb 17;14(4):1014. doi: 10.3390/cancers14041014 (PMC8870250; doi:10.3390/cancers14041014)
Supplement: Supplementary file 1 [file cancers-14-01014-s001.zip › Table.S6.xlsx]

## Sheet: Sheet 1
source	term_name	term_id	adjusted_p_value	negative_log10_of_adjusted_p_value	term_size	query_size	intersection_size	effective_domain_size	intersections
GO:MF	RNA binding	GO:0003723	1.0443574213081965e-12	11.98115084277388	1951	245	70	18679	RPL41,LSM8,SAFB2,SMG1,SAFB,RPS14,ZNF638,ZNF207,SREK1,SNRPG,UPF1,RBM6,NONO,RANBP2,KRI1,UBTF,LUC7L,TCEAL4,PPIA,RPL23A,CCDC137,PNISR,METTL16,CHD2,FAM50A,ELOC,CNOT7,SURF6,RAN,EDF1,RRBP1,PURA,RPL15,HTATSF1,EIF3CL,CDK11B,PELP1,GOLGB1,MACF1,DAZAP1,CCDC9,RPL10A,EIF2S3B,PCBP2,TBL3,EIF3A,BMS1,RPS3A,WDR46,HNRNPLL,SMG6,HELZ,SUGP2,SNRNP70,CANX,SLC25A5,EWSR1,RBM15,DHX38,SSB,PPAN,DDX54,NXF1,LUC7L3,THRAP3,FLYWCH…
GO:MF	nucleic acid binding	GO:0003676	6.395852291134832e-7	6.194101574614016	4252	245	97	18679	RPL41,LSM8,SAFB2,SMG1,HDGFL2,SAFB,RPS14,ZNF627,ZNF638,ZNF207,SREK1,SCYL1,ZBTB37,SNRPG,UPF1,ZNF652,RBM6,ZNF37A,NONO,RANBP2,KRI1,UBTF,LUC7L,TCEAL4,PPIA,RPL23A,POLD1,CCDC137,PNISR,METTL16,CHD2,FAM50A,MBD3,ELOC,ZNF221,SREK1IP1,CNOT7,SURF6,RAN,EDF1,RRBP1,PURA,RPL15,POLR2J3,HTATSF1,EIF3CL,CDK11B,PELP1,ZNF707,GOLGB1,MACF1,DAZAP1,CCDC9,RPL10A,TELO2,EIF2S3B,PCBP2,TBL3,EIF3A,BMS1,TAF10,RPS3A,ZGPAT,WDR46,HN…
GO:MF	heterocyclic compound binding	GO:1901363	0.000010524594037938071	4.977794647082188	6210	245	122	18679	RPL41,LSM8,SAFB2,SMG1,HDGFL2,SAFB,RPS14,KIAA0232,FKBP2,ZNF627,ZNF638,ZNF207,SREK1,SCYL1,N4BP2,ZBTB37,SNRPG,UPF1,ZNF652,RBM6,ZNF37A,NONO,RANBP2,KRI1,KIF7,KIF3A,CSNK2A3,UBTF,MVD,FKBP1A,GAK,LUC7L,OLA1,TCEAL4,PPIA,RPL23A,POLD1,CCDC137,PNISR,TTBK2,METTL16,CHD2,FAM50A,MBD3,ELOC,ZNF221,SREK1IP1,CNOT7,SURF6,RAN,EDF1,RRBP1,PURA,PSMC5,RPL15,POLR2J3,HTATSF1,ARFRP1,EIF3CL,CDK11B,PELP1,ZNF707,GOLGB1,DAPK3,MAC…
GO:MF	organic cyclic compound binding	GO:0097159	0.000017734214991470237	4.751188030897602	6291	245	122	18679	RPL41,LSM8,SAFB2,SMG1,HDGFL2,SAFB,RPS14,KIAA0232,FKBP2,ZNF627,ZNF638,ZNF207,SREK1,SCYL1,N4BP2,ZBTB37,SNRPG,UPF1,ZNF652,RBM6,ZNF37A,NONO,RANBP2,KRI1,KIF7,KIF3A,CSNK2A3,UBTF,MVD,FKBP1A,GAK,LUC7L,OLA1,TCEAL4,PPIA,RPL23A,POLD1,CCDC137,PNISR,TTBK2,METTL16,CHD2,FAM50A,MBD3,ELOC,ZNF221,SREK1IP1,CNOT7,SURF6,RAN,EDF1,RRBP1,PURA,PSMC5,RPL15,POLR2J3,HTATSF1,ARFRP1,EIF3CL,CDK11B,PELP1,ZNF707,GOLGB1,DAPK3,MAC…
GO:MF	protein binding	GO:0005515	0.0034245863216176508	2.4653918822998335	14767	245	218	18679	RPL41,LSM8,APOC2,SUPT4H1,MAGED4,BCKDHA,GOLGA4,SAFB2,CNIH1,GOLGA3,ALMS1,SMG1,HDGFL2,SAFB,POTEE,RPS14,CCDC88B,FKBP2,GTF2A2,ZNF627,ZNF207,SREK1,SCYL1,N4BP2,ZBTB37,CEP250,LYPLA1,ANKRD36C,ATP5MG,NUMA1,NDUFS7,SNRPG,COX7C,UPF1,ZNF652,RBM6,NONO,NIPBL,RANBP2,TCEAL3,ANKRD12,KRI1,KIF7,KIF3A,CSNK2A3,MMADHC,UBTF,MVD,RSF1,FKBP1A,CNIH4,GAK,KIAA1109,RIF1,CRTAP,LUC7L,GCC2,OLA1,TCEAL4,CTNNBL1,PPIA,RPL23A,POLD1,CCD…
GO:MF	telomeric DNA binding	GO:0042162	0.009961337020585234	2.0016823662256797	36	245	5	18679	SMG1,UPF1,PURA,TELO2,SMG6
GO:MF	K6-linked polyubiquitin modification-dependent protein binding	GO:0071796	0.014515385384998228	1.8381714291153757	2	245	2	18679	MINDY2,UBXN1
GO:MF	binding	GO:0005488	0.016232853156059154	1.7896051399993704	17070	245	238	18679	RPL41,LSM8,APOC2,SUPT4H1,MAGED4,SELENOT,BCKDHA,GOLGA4,SAFB2,CNIH1,GOLGA3,ALMS1,SMG1,HDGFL2,SAFB,KCMF1,POTEE,RPS14,CCDC88B,KIAA0232,FKBP2,GTF2A2,ZNF627,ZNF638,ZNF207,SREK1,SCYL1,N4BP2,ZBTB37,CEP250,LYPLA1,ANKRD36C,ATP5MG,NUMA1,NDUFS7,SNRPG,COX7C,UPF1,ZNF652,RBM6,ZNF37A,NONO,NIPBL,RANBP2,TCEAL3,ANKRD12,KRI1,KIF7,KIF3A,CSNK2A3,MMADHC,UBTF,MVD,RSF1,FKBP1A,CNIH4,GAK,KIAA1109,RIF1,CRTAP,LUC7L,GCC2,OLA1…
GO:BP	RNA processing	GO:0006396	1.2223909567853202e-8	7.912789871655134	1010	234	43	18123	RPL41,LSM8,SUPT4H1,SAFB2,SAFB,RPS14,ZNF638,SREK1,SNRPG,RBM6,NONO,KRI1,LUC7L,CTNNBL1,RPL23A,METTL16,SREK1IP1,PPP2CA,RPL15,HTATSF1,CDK11B,PELP1,DAZAP1,RPL10A,PCBP2,INTS1,TBL3,BMS1,WDR46,HNRNPLL,SUGP2,SNRNP70,RBM15,DHX38,SSB,PPAN,DDX54,LUC7L3,PAF1,TSR3,THRAP3,CLK1,RBM12B
GO:BP	mRNA metabolic process	GO:0016071	8.832819867648629e-8	7.053900626269072	880	234	38	18123	RPL41,LSM8,SUPT4H1,SAFB2,SMG1,SAFB,RPS14,SREK1,SNRPG,UPF1,RBM6,NONO,LUC7L,CTNNBL1,RPL23A,METTL16,SREK1IP1,PPP2CA,CNOT7,PSMC5,RPL15,HTATSF1,CDK11B,DAZAP1,RPL10A,PCBP2,RPS3A,HNRNPLL,SMG6,SUGP2,SNRNP70,RBM15,DHX38,SSB,LUC7L3,PAF1,THRAP3,DAZ1
GO:BP	nucleic acid metabolic process	GO:0090304	0.000003131160946740396	5.504294608370066	5234	234	110	18123	RPL41,LSM8,SUPT4H1,INO80D,SAFB2,SMG1,HDGFL2,SAFB,RPS14,GTF2A2,ZNF627,ZNF638,SREK1,N4BP2,ZBTB37,SNRPG,UPF1,ZNF652,RBM6,ZNF37A,NONO,NIPBL,KRI1,UBTF,RSF1,RIF1,LUC7L,CTNNBL1,PPIA,RPL23A,POLD1,YWHAQ,METTL16,CHD2,PEX2,MBD3,ELOC,ZNF221,SREK1IP1,NFKBIL1,PPP2CA,CNOT7,RAN,EDF1,PURA,PSMC5,RPL15,AXIN1,POLR2J3,HTATSF1,CDK11B,PELP1,ZNF707,GOLGB1,DAPK3,DAZAP1,RPL10A,TELO2,PCBP2,INTS1,TBL3,BMS1,PAXX,TAF10,RESF1,…
GO:BP	intracellular transport	GO:0046907	0.000003871708434773215	5.412097355376258	1723	234	52	18123	RPL41,CNIH1,ALMS1,SMG1,RPS14,CCDC88B,ATP5MG,NUMA1,SNRPG,UPF1,RANBP2,KIF3A,CNIH4,GAK,KIAA1109,GCC2,RPL23A,TIMM8B,YWHAQ,PEX2,RNF139,CEP131,RAN,PURA,RPL15,GRIPAP1,ARFRP1,GOLGB1,RPL10A,RPS3A,TIMM13,RAB8A,KIF5B,SMG6,SSR3,SRPRB,AKAP13,ATP5F1E,DHX38,SSB,NACA2,EVI5,NXF1,IFT140,PTPN11,DMAP1,SEC22A,ANTKMT,CCHCR1,ARL5A,SETD2,CAPZA1
GO:BP	nucleobase-containing compound metabolic process	GO:0006139	0.0000059653511012689305	5.22436399007305	5752	234	116	18123	RPL41,LSM8,SUPT4H1,INO80D,SAFB2,SMG1,HDGFL2,SAFB,RPS14,GTF2A2,ZNF627,ZNF638,SREK1,N4BP2,ZBTB37,ATP5MG,SNRPG,UPF1,ZNF652,RBM6,ZNF37A,NONO,NIPBL,RANBP2,KRI1,UBTF,MVD,RSF1,RIF1,LUC7L,CTNNBL1,PPIA,RPL23A,POLD1,YWHAQ,METTL16,CHD2,PEX2,MBD3,ELOC,ZNF221,SREK1IP1,NFKBIL1,PPP2CA,CNOT7,RAN,EDF1,PURA,PSMC5,RPL15,AXIN1,POLR2J3,HTATSF1,CDK11B,PELP1,ZNF707,GOLGB1,DAPK3,DAZAP1,RPL10A,TELO2,PCBP2,INTS1,TBL3,BMS1…
GO:BP	RNA metabolic process	GO:0016070	0.000009876157769664178	5.005411980916363	4714	234	100	18123	RPL41,LSM8,SUPT4H1,SAFB2,SMG1,HDGFL2,SAFB,RPS14,GTF2A2,ZNF627,ZNF638,SREK1,ZBTB37,SNRPG,UPF1,ZNF652,RBM6,ZNF37A,NONO,NIPBL,KRI1,UBTF,RSF1,RIF1,LUC7L,CTNNBL1,PPIA,RPL23A,YWHAQ,METTL16,CHD2,PEX2,MBD3,ELOC,ZNF221,SREK1IP1,NFKBIL1,PPP2CA,CNOT7,RAN,EDF1,PURA,PSMC5,RPL15,AXIN1,POLR2J3,HTATSF1,CDK11B,PELP1,ZNF707,GOLGB1,DAPK3,DAZAP1,RPL10A,PCBP2,INTS1,TBL3,BMS1,TAF10,RESF1,RPS3A,ZGPAT,WDR46,BDP1,HNRNPLL…
GO:BP	cellular nitrogen compound metabolic process	GO:0034641	0.000011695434945984488	4.931983622411604	6576	234	126	18123	RPL41,LSM8,SUPT4H1,SELENOT,INO80D,SAFB2,SMG1,HDGFL2,SAFB,RPS14,GTF2A2,ZNF627,ZNF638,SREK1,N4BP2,ZBTB37,ATP5MG,SNRPG,UPF1,ZNF652,RBM6,ZNF37A,NONO,NIPBL,RANBP2,KRI1,UBTF,MVD,RSF1,RIF1,LUC7L,TCEAL4,CTNNBL1,PPIA,RPL23A,POLD1,YWHAQ,METTL16,CHD2,PEX2,MBD3,ELOC,ZNF221,SREK1IP1,RNF139,NFKBIL1,PPP2CA,CNOT7,RAN,EDF1,RRBP1,PURA,PSMC5,RPL15,AXIN1,POLR2J3,SAMD8,HTATSF1,EIF3CL,CDK11B,PELP1,ZNF707,GOLGB1,DAPK3,…
GO:BP	heterocycle metabolic process	GO:0046483	0.000011695434945984488	4.931983622411604	5929	234	117	18123	RPL41,LSM8,SUPT4H1,INO80D,SAFB2,SMG1,HDGFL2,SAFB,RPS14,GTF2A2,ZNF627,ZNF638,SREK1,N4BP2,ZBTB37,ATP5MG,SNRPG,UPF1,ZNF652,RBM6,ZNF37A,NONO,NIPBL,RANBP2,KRI1,MMADHC,UBTF,MVD,RSF1,RIF1,LUC7L,CTNNBL1,PPIA,RPL23A,POLD1,YWHAQ,METTL16,CHD2,PEX2,MBD3,ELOC,ZNF221,SREK1IP1,NFKBIL1,PPP2CA,CNOT7,RAN,EDF1,PURA,PSMC5,RPL15,AXIN1,POLR2J3,HTATSF1,CDK11B,PELP1,ZNF707,GOLGB1,DAPK3,DAZAP1,RPL10A,TELO2,PCBP2,INTS1,TB…
GO:BP	RNA splicing	GO:0008380	0.000011897757532223065	4.924534885931355	459	234	23	18123	LSM8,ZNF638,SREK1,SNRPG,RBM6,NONO,LUC7L,CTNNBL1,METTL16,SREK1IP1,PPP2CA,HTATSF1,DAZAP1,PCBP2,HNRNPLL,SUGP2,SNRNP70,RBM15,DHX38,LUC7L3,THRAP3,CLK1,RBM12B
GO:BP	cellular aromatic compound metabolic process	GO:0006725	0.000014797689516142397	4.829806089248468	5973	234	117	18123	RPL41,LSM8,SUPT4H1,INO80D,SAFB2,SMG1,HDGFL2,SAFB,RPS14,GTF2A2,ZNF627,ZNF638,SREK1,N4BP2,ZBTB37,ATP5MG,SNRPG,UPF1,ZNF652,RBM6,ZNF37A,NONO,NIPBL,RANBP2,KRI1,MMADHC,UBTF,MVD,RSF1,RIF1,LUC7L,CTNNBL1,PPIA,RPL23A,POLD1,YWHAQ,METTL16,CHD2,PEX2,MBD3,ELOC,ZNF221,SREK1IP1,NFKBIL1,PPP2CA,CNOT7,RAN,EDF1,PURA,PSMC5,RPL15,AXIN1,POLR2J3,HTATSF1,CDK11B,PELP1,ZNF707,GOLGB1,DAPK3,DAZAP1,RPL10A,TELO2,PCBP2,INTS1,TB…
GO:BP	mRNA processing	GO:0006397	0.000034645379180841874	4.460354681112327	532	234	24	18123	LSM8,SUPT4H1,SAFB2,SAFB,SREK1,SNRPG,RBM6,NONO,LUC7L,CTNNBL1,METTL16,SREK1IP1,HTATSF1,CDK11B,DAZAP1,PCBP2,HNRNPLL,SUGP2,SNRNP70,RBM15,DHX38,LUC7L3,PAF1,THRAP3
GO:BP	gene expression	GO:0010467	0.000053959899377859584	4.267928868853378	6192	234	118	18123	RPL41,LSM8,SUPT4H1,SELENOT,SAFB2,SMG1,HDGFL2,SAFB,RPS14,CCDC88B,GTF2A2,ZNF627,ZNF638,SREK1,ZBTB37,SNRPG,UPF1,ZNF652,RBM6,ZNF37A,NONO,NIPBL,RANBP2,KRI1,UBTF,RSF1,FKBP1A,RIF1,LUC7L,TCEAL4,CTNNBL1,PPIA,RPL23A,YWHAQ,METTL16,CHD2,PEX2,MBD3,ELOC,ZNF221,SREK1IP1,RNF139,NFKBIL1,PPP2CA,CNOT7,RAN,EDF1,RRBP1,PURA,PSMC5,RPL15,AXIN1,POLR2J3,HTATSF1,EIF3CL,CDK11B,PELP1,ZNF707,GOLGB1,DAPK3,DAZAP1,RPL10A,EIF2S3B…
GO:BP	ribonucleoprotein complex biogenesis	GO:0022613	0.000060674336684639975	4.216994962845641	473	234	22	18123	RPL41,RPS14,SNRPG,KRI1,LUC7L,RPL23A,METTL16,SURF6,RAN,RPL15,EIF3CL,PELP1,RPL10A,EIF2S3B,TBL3,EIF3A,BMS1,WDR46,PPAN,DDX54,LUC7L3,TSR3
GO:BP	organic cyclic compound metabolic process	GO:1901360	0.0001281536479511452	3.892269026916306	6227	234	117	18123	RPL41,LSM8,SUPT4H1,INO80D,SAFB2,SMG1,HDGFL2,SAFB,RPS14,GTF2A2,ZNF627,ZNF638,SREK1,N4BP2,ZBTB37,ATP5MG,SNRPG,UPF1,ZNF652,RBM6,ZNF37A,NONO,NIPBL,RANBP2,KRI1,MMADHC,UBTF,MVD,RSF1,RIF1,LUC7L,CTNNBL1,PPIA,RPL23A,POLD1,YWHAQ,METTL16,CHD2,PEX2,MBD3,ELOC,ZNF221,SREK1IP1,NFKBIL1,PPP2CA,CNOT7,RAN,EDF1,PURA,PSMC5,RPL15,AXIN1,POLR2J3,HTATSF1,CDK11B,PELP1,ZNF707,GOLGB1,DAPK3,DAZAP1,RPL10A,TELO2,PCBP2,INTS1,TB…
GO:BP	cellular component biogenesis	GO:0044085	0.00024910282151373195	3.6036213533109254	3377	234	74	18123	RPL41,APOC2,DMAC1,CNIH1,ALMS1,RPS14,GTF2A2,ZNF207,CEP250,NUMA1,NDUFS7,SNRPG,KRI1,KIF3A,UBTF,RSF1,FKBP1A,GAK,LUC7L,RPL23A,NDUFC2,TTBK2,METTL16,NASP,MBD3,CEP131,PPP2CA,CNOT7,SURF6,RAN,PSMC5,RPL15,AXIN1,SAMD8,EIF3CL,PELP1,DAPK3,MACF1,RPL10A,EIF2S3B,ARHGEF18,TBL3,EIF3A,BMS1,TAF10,RESF1,WDR46,SDHAF4,RAB8A,TBCD,BDP1,CFAP410,CFL2,CEP192,AKAP13,PPAN,DDX54,NCK1,LUC7L3,IFT140,SLK,PTPN11,HDAC4,PAF1,TSR3,SMA…
GO:BP	protein-containing complex localization	GO:0031503	0.00024910282151373195	3.6036213533109254	289	234	16	18123	SMG1,UPF1,RANBP2,KIF3A,CEP131,RAN,PURA,GRIPAP1,RAB8A,KIF5B,SMG6,DHX38,SSB,NXF1,IFT140,SETD2
GO:BP	establishment of protein localization to membrane	GO:0090150	0.0005642535303119402	3.2485257150323026	385	234	18	18123	RPL41,GOLGA4,RPS14,LYPLA1,RPL23A,TIMM8B,YWHAQ,PEX2,RPL15,GRIPAP1,ARFRP1,MACF1,RPL10A,RPS3A,TIMM13,RAB8A,SSR3,NACA2
GO:BP	protein localization to organelle	GO:0033365	0.0005764722015652243	3.239221630256371	974	234	31	18123	RPL41,RPS14,CEP250,NUMA1,NIPBL,RANBP2,GAK,GCC2,RPL23A,TIMM8B,YWHAQ,TTBK2,PEX2,CEP131,RAN,RPL15,ARFRP1,RER1,GOLGB1,RPL10A,RPS3A,TIMM13,SSR3,CEP192,SRPRB,SSB,IFT140,PAF1,DMAP1,ARL5A,SETD2
GO:BP	establishment of localization in cell	GO:0051649	0.0005764722015652243	3.239221630256371	2778	234	63	18123	RPL41,SELENOT,CNIH1,ALMS1,SMG1,KCMF1,RPS14,CCDC88B,ATP5MG,NUMA1,SNRPG,UPF1,RANBP2,KIF3A,FKBP1A,CNIH4,GAK,KIAA1109,GCC2,OLA1,PPIA,RPL23A,TIMM8B,NDUFC2,YWHAQ,PEX2,RNF139,CEP131,RAN,PURA,RPL15,GRIPAP1,ARFRP1,GOLGB1,RPL10A,RPS3A,TIMM13,RAB8A,KIF5B,SMG6,DNAJC5,SSR3,SRPRB,AKAP13,ATP5F1E,CANX,DHX38,SSB,GLB1,NACA2,EVI5,NXF1,IFT140,PTPN11,ARHGAP45,PPT1,DMAP1,SEC22A,ANTKMT,CCHCR1,ARL5A,SETD2,CAPZA1
GO:BP	nuclear-transcribed mRNA catabolic process	GO:0000956	0.0007226248996560011	3.1410870779231392	214	234	13	18123	RPL41,SMG1,RPS14,UPF1,RPL23A,PPP2CA,CNOT7,RPL15,RPL10A,RPS3A,SMG6,SSB,THRAP3
GO:BP	nuclear-transcribed mRNA catabolic process, nonsense-mediated decay	GO:0000184	0.0007226248996560011	3.1410870779231392	123	234	10	18123	RPL41,SMG1,RPS14,UPF1,RPL23A,PPP2CA,RPL15,RPL10A,RPS3A,SMG6
GO:BP	ribosome biogenesis	GO:0042254	0.001208283147000209	2.9178312819645233	335	234	16	18123	RPL41,RPS14,KRI1,RPL23A,METTL16,SURF6,RAN,RPL15,PELP1,RPL10A,TBL3,BMS1,WDR46,PPAN,DDX54,TSR3
GO:BP	rRNA processing	GO:0006364	0.0013642277291239045	2.865113127299292	265	234	14	18123	RPL41,RPS14,KRI1,RPL23A,METTL16,RPL15,PELP1,RPL10A,TBL3,BMS1,WDR46,PPAN,DDX54,TSR3
GO:BP	protein folding	GO:0006457	0.0013642277291239045	2.865113127299292	230	234	13	18123	FKBP2,RANBP2,FKBP1A,GAK,CRTAP,PPIA,TBCD,DNAJC5,SNRNP70,UBXN1,CANX,ENGASE,TBCA
GO:BP	cellular localization	GO:0051641	0.0014310589941183046	2.8443424624722713	3519	234	73	18123	RPL41,SELENOT,GOLGA4,CNIH1,ALMS1,SMG1,KCMF1,RPS14,CCDC88B,SCYL1,CEP250,LYPLA1,ATP5MG,NUMA1,SNRPG,UPF1,NIPBL,RANBP2,KIF3A,FKBP1A,CNIH4,GAK,KIAA1109,GCC2,OLA1,PPIA,RPL23A,TIMM8B,NDUFC2,YWHAQ,TTBK2,PEX2,RNF139,CEP131,RAN,PURA,RPL15,GRIPAP1,ARFRP1,RER1,GOLGB1,MACF1,RPL10A,RPS3A,TIMM13,RAB8A,KIF5B,SMG6,DNAJC5,SSR3,CEP192,SRPRB,AKAP13,ATP5F1E,CANX,DHX38,SSB,GLB1,NACA2,EVI5,NXF1,IFT140,PTPN11,PAF1,ARHGA…
GO:BP	viral gene expression	GO:0019080	0.001622806642329178	2.7897332233481618	237	234	13	18123	RPL41,SUPT4H1,RPS14,RANBP2,RSF1,RPL23A,RPL15,RPL10A,PCBP2,EIF3A,RPS3A,CANX,SSB
GO:BP	nuclear export	GO:0051168	0.001622806642329178	2.7897332233481618	202	234	12	18123	SMG1,UPF1,RANBP2,RAN,SMG6,AKAP13,DHX38,SSB,NXF1,PTPN11,CCHCR1,SETD2
GO:BP	cellular protein-containing complex assembly	GO:0034622	0.001622806642329178	2.7897332233481618	1150	234	33	18123	DMAC1,RPS14,GTF2A2,ZNF207,NUMA1,NDUFS7,SNRPG,UBTF,RSF1,FKBP1A,LUC7L,RPL23A,NDUFC2,NASP,PSMC5,AXIN1,EIF3CL,EIF2S3B,EIF3A,TAF10,SDHAF4,TBCD,BDP1,CEP192,PPAN,NCK1,LUC7L3,SMAD4,FCHSD2,TBCA,CAPZA1,RPA3,TMOD2
GO:BP	rRNA metabolic process	GO:0016072	0.0016826765094194295	2.7739993680869666	275	234	14	18123	RPL41,RPS14,KRI1,RPL23A,METTL16,RPL15,PELP1,RPL10A,TBL3,BMS1,WDR46,PPAN,DDX54,TSR3
GO:BP	cellular component organization or biogenesis	GO:0071840	0.00237117854810468	2.6250357427164146	6880	234	120	18123	RPL41,APOC2,SUPT4H1,DMAC1,GOLGA4,CNIH1,ALMS1,SMG1,HDGFL2,SAFB,RPS14,CCDC88B,GTF2A2,ZNF207,CEP250,ATP5MG,NUMA1,NDUFS7,SNRPG,UPF1,NIPBL,RANBP2,KRI1,KIF3A,CSNK2A3,UBTF,RSF1,FKBP1A,GAK,KIAA1109,RIF1,CRTAP,LUC7L,GCC2,PPIA,RPL23A,POLD1,TIMM8B,NDUFC2,YWHAQ,MTX3,TTBK2,METTL16,NASP,CHD2,PEX2,FAM50A,MBD3,CEP131,PPP2CA,CNOT7,SURF6,RAN,PURA,PSMC5,RPL15,AXIN1,GRIPAP1,SAMD8,RER1,EIF3CL,CDK11B,PELP1,GOLGB1,DAPK…
GO:BP	organelle organization	GO:0006996	0.002595689343314824	2.5857472858922144	4136	234	81	18123	SUPT4H1,DMAC1,CNIH1,ALMS1,SMG1,SAFB,RPS14,CCDC88B,ZNF207,CEP250,ATP5MG,NUMA1,NDUFS7,UPF1,NIPBL,RANBP2,KIF3A,RSF1,GAK,RIF1,GCC2,PPIA,RPL23A,POLD1,TIMM8B,NDUFC2,YWHAQ,MTX3,TTBK2,NASP,CHD2,PEX2,FAM50A,MBD3,CEP131,PPP2CA,CNOT7,RAN,PURA,GOLGB1,DAPK3,MACF1,TELO2,ARHGEF18,ARHGAP4,TAF10,RESF1,TIMM13,SDHAF4,RAB8A,TBCD,CFAP410,KIF5B,SMG6,CFL2,CEP192,RNF2,AKAP13,ATP5F1E,SLC25A5,PPAN,NCK1,IFT140,SLK,ATAD2B,H…
GO:BP	cytoplasmic translation	GO:0002181	0.002595689343314824	2.5857472858922144	149	234	10	18123	RPL41,RPS14,RPL23A,RPL15,EIF3CL,RPL10A,EIF2S3B,EIF3A,RPS3A,NCK1
GO:BP	protein localization	GO:0008104	0.003392680428617874	2.469457046521742	2670	234	58	18123	RPL41,SELENOT,GOLGA4,RPS14,SCYL1,CEP250,LYPLA1,NUMA1,NIPBL,RANBP2,KIF3A,FKBP1A,CNIH4,GAK,GCC2,PPIA,RPL23A,TIMM8B,YWHAQ,MTX3,TTBK2,NASP,PEX2,CEP131,RAN,RRBP1,RPL15,GRIPAP1,ARFRP1,RER1,GOLGB1,MACF1,RPL10A,ARHGEF18,RPS3A,TIMM13,RAB8A,UBE2D2,KIF5B,SSR3,CEP192,SRPRB,CANX,SSB,NACA2,EVI5,NXF1,IFT140,PTPN11,PAF1,PPT1,DMAP1,SEC22A,FCHSD2,CCHCR1,ARL5A,KCNS3,SETD2
GO:BP	ribosomal small subunit biogenesis	GO:0042274	0.004285186747107853	2.368030246909698	74	234	7	18123	RPS14,KRI1,SURF6,TBL3,BMS1,WDR46,TSR3
GO:BP	macromolecule metabolic process	GO:0043170	0.004285186747107853	2.368030246909698	9867	234	157	18123	RPL41,LSM8,SUPT4H1,SELENOT,INO80D,SAFB2,SMG1,HDGFL2,SAFB,KCMF1,RPS14,CCDC88B,FKBP2,GTF2A2,ZNF627,ZNF638,SREK1,SCYL1,N4BP2,ZBTB37,LYPLA1,SNRPG,UPF1,ZNF652,RBM6,ZNF37A,NONO,NIPBL,RANBP2,KRI1,CSNK2A3,UBTF,MVD,RSF1,FKBP1A,GAK,RIF1,CRTAP,LUC7L,TCEAL4,CTNNBL1,PPIA,RPL23A,POLD1,YWHAQ,TTC3,TTBK2,METTL16,NASP,CHD2,PEX2,MBD3,ELOC,ZNF221,SREK1IP1,RNF139,NFKBIL1,PPP2CA,CNOT7,RAN,EDF1,RRBP1,PURA,PSMC5,RPL15,A…
GO:BP	maturation of SSU-rRNA	GO:0030490	0.004285186747107853	2.368030246909698	50	234	6	18123	RPS14,KRI1,TBL3,BMS1,WDR46,TSR3
GO:BP	RNA export from nucleus	GO:0006405	0.004285186747107853	2.368030246909698	129	234	9	18123	SMG1,UPF1,RANBP2,RAN,SMG6,DHX38,SSB,NXF1,SETD2
GO:BP	mRNA catabolic process	GO:0006402	0.004285186747107853	2.368030246909698	388	234	16	18123	RPL41,SMG1,RPS14,UPF1,RPL23A,METTL16,PPP2CA,CNOT7,PSMC5,RPL15,RPL10A,RPS3A,SMG6,SSB,THRAP3,DAZ1
GO:BP	ribonucleoprotein complex localization	GO:0071166	0.004285186747107853	2.368030246909698	131	234	9	18123	SMG1,UPF1,RANBP2,RAN,SMG6,DHX38,SSB,NXF1,SETD2
GO:BP	ribonucleoprotein complex export from nucleus	GO:0071426	0.004285186747107853	2.368030246909698	130	234	9	18123	SMG1,UPF1,RANBP2,RAN,SMG6,DHX38,SSB,NXF1,SETD2
GO:BP	nitrogen compound transport	GO:0071705	0.004285186747107853	2.368030246909698	2216	234	50	18123	RPL41,SELENOT,GOLGA4,SMG1,RPS14,SLC38A10,LYPLA1,UPF1,RANBP2,KIF3A,CNIH4,GCC2,PPIA,RPL23A,TIMM8B,YWHAQ,MTX3,NASP,PEX2,CEP131,RAN,RRBP1,RPL15,GRIPAP1,ARFRP1,MACF1,RPL10A,RPS3A,TIMM13,RAB8A,KIF5B,SMG6,SSR3,SRPRB,CANX,SLC25A5,DHX38,SSB,NACA2,EVI5,NXF1,PTPN11,PPT1,DMAP1,SEC22A,FCHSD2,CCHCR1,ARL5A,KCNS3,SETD2
GO:BP	protein transport	GO:0015031	0.005056013917250936	2.2961917392792777	1754	234	42	18123	RPL41,SELENOT,GOLGA4,RPS14,LYPLA1,RANBP2,KIF3A,CNIH4,GCC2,PPIA,RPL23A,TIMM8B,YWHAQ,MTX3,NASP,PEX2,CEP131,RAN,RRBP1,RPL15,GRIPAP1,ARFRP1,MACF1,RPL10A,RPS3A,TIMM13,RAB8A,KIF5B,SSR3,SRPRB,CANX,NACA2,EVI5,NXF1,PTPN11,PPT1,DMAP1,SEC22A,FCHSD2,CCHCR1,ARL5A,KCNS3
GO:BP	protein localization to microtubule cytoskeleton	GO:0072698	0.005293237551843063	2.276278615145407	54	234	6	18123	CEP250,NUMA1,TTBK2,CEP131,GOLGB1,CEP192
GO:BP	translational initiation	GO:0006413	0.005316844941967569	2.2743460050666373	203	234	11	18123	RPL41,RPS14,RPL23A,RPL15,EIF3CL,RPL10A,EIF2S3B,EIF3A,RPS3A,NCK1,DAZ1
GO:BP	RNA splicing, via transesterification reactions with bulged adenosine as nucleophile	GO:0000377	0.0053581016906774056	2.2709890482341617	360	234	15	18123	LSM8,SNRPG,RBM6,NONO,LUC7L,CTNNBL1,METTL16,HTATSF1,DAZAP1,PCBP2,SNRNP70,RBM15,DHX38,LUC7L3,THRAP3
GO:BP	mRNA splicing, via spliceosome	GO:0000398	0.0053581016906774056	2.2709890482341617	360	234	15	18123	LSM8,SNRPG,RBM6,NONO,LUC7L,CTNNBL1,METTL16,HTATSF1,DAZAP1,PCBP2,SNRNP70,RBM15,DHX38,LUC7L3,THRAP3
GO:BP	RNA splicing, via transesterification reactions	GO:0000375	0.005754195866818798	2.2400153592634138	363	234	15	18123	LSM8,SNRPG,RBM6,NONO,LUC7L,CTNNBL1,METTL16,HTATSF1,DAZAP1,PCBP2,SNRNP70,RBM15,DHX38,LUC7L3,THRAP3
GO:BP	protein localization to microtubule organizing center	GO:1905508	0.0057703315353095025	2.238799233669384	35	234	5	18123	CEP250,NUMA1,CEP131,GOLGB1,CEP192
GO:BP	cellular protein localization	GO:0034613	0.006258905516919532	2.203501604412544	1842	234	43	18123	RPL41,GOLGA4,RPS14,SCYL1,CEP250,LYPLA1,NUMA1,NIPBL,RANBP2,KIF3A,GAK,GCC2,RPL23A,TIMM8B,YWHAQ,TTBK2,PEX2,CEP131,RAN,RPL15,GRIPAP1,ARFRP1,RER1,GOLGB1,MACF1,RPL10A,RPS3A,TIMM13,RAB8A,KIF5B,SSR3,CEP192,SRPRB,SSB,NACA2,EVI5,IFT140,PTPN11,PAF1,DMAP1,CCHCR1,ARL5A,SETD2
GO:BP	chromosome organization	GO:0051276	0.006435135152250535	2.1914423275070307	1270	234	33	18123	SUPT4H1,SMG1,SAFB,ZNF207,NUMA1,UPF1,NIPBL,RSF1,RIF1,POLD1,NASP,CHD2,FAM50A,MBD3,RAN,PURA,DAPK3,TELO2,TAF10,RESF1,SMG6,RNF2,ATAD2B,HDAC4,PAF1,SMAD4,JMJD1C,DMAP1,SLX1A,SETD2,NSMCE2,MORC2,RPA3
GO:BP	protein targeting to ER	GO:0045047	0.006443783573915485	2.1908590545707405	111	234	8	18123	RPL41,RPS14,RPL23A,RPL15,RPL10A,RPS3A,SSR3,SRPRB
GO:BP	cellular macromolecule localization	GO:0070727	0.006510371118726896	2.1863942541013457	1856	234	43	18123	RPL41,GOLGA4,RPS14,SCYL1,CEP250,LYPLA1,NUMA1,NIPBL,RANBP2,KIF3A,GAK,GCC2,RPL23A,TIMM8B,YWHAQ,TTBK2,PEX2,CEP131,RAN,RPL15,GRIPAP1,ARFRP1,RER1,GOLGB1,MACF1,RPL10A,RPS3A,TIMM13,RAB8A,KIF5B,SSR3,CEP192,SRPRB,SSB,NACA2,EVI5,IFT140,PTPN11,PAF1,DMAP1,CCHCR1,ARL5A,SETD2
GO:BP	protein localization to membrane	GO:0072657	0.006510371118726896	2.1863942541013457	698	234	22	18123	RPL41,GOLGA4,RPS14,LYPLA1,GAK,RPL23A,TIMM8B,YWHAQ,PEX2,RPL15,GRIPAP1,ARFRP1,RER1,MACF1,RPL10A,RPS3A,TIMM13,RAB8A,KIF5B,SSR3,NACA2,ARL5A
GO:BP	protein localization to endoplasmic reticulum	GO:0070972	0.006510371118726896	2.1863942541013457	144	234	9	18123	RPL41,RPS14,RPL23A,RPL15,RER1,RPL10A,RPS3A,SSR3,SRPRB
GO:BP	Golgi vesicle transport	GO:0048193	0.006510371118726896	2.1863942541013457	415	234	16	18123	GOLGA4,CNIH1,SCYL1,LYPLA1,KIF3A,CNIH4,GAK,GCC2,RNF139,ARFRP1,RER1,GOLGB1,MACF1,RAB8A,SEC22A,CAPZA1
GO:BP	maturation of SSU-rRNA from tricistronic rRNA transcript (SSU-rRNA, 5.8S rRNA, LSU-rRNA)	GO:0000462	0.006510371118726896	2.1863942541013457	37	234	5	18123	RPS14,KRI1,TBL3,BMS1,WDR46
GO:BP	protein localization to cytoskeleton	GO:0044380	0.006510371118726896	2.1863942541013457	58	234	6	18123	CEP250,NUMA1,TTBK2,CEP131,GOLGB1,CEP192
GO:BP	regulation of mRNA processing	GO:0050684	0.0066460516797977555	2.1774362859637586	145	234	9	18123	SAFB2,SAFB,METTL16,CDK11B,DAZAP1,SNRNP70,RBM15,PAF1,THRAP3
GO:BP	establishment of protein localization	GO:0045184	0.0069645711879269085	2.1571056181416917	1866	234	43	18123	RPL41,SELENOT,GOLGA4,RPS14,LYPLA1,NIPBL,RANBP2,KIF3A,CNIH4,GCC2,PPIA,RPL23A,TIMM8B,YWHAQ,MTX3,NASP,PEX2,CEP131,RAN,RRBP1,RPL15,GRIPAP1,ARFRP1,MACF1,RPL10A,RPS3A,TIMM13,RAB8A,KIF5B,SSR3,SRPRB,CANX,NACA2,EVI5,NXF1,PTPN11,PPT1,DMAP1,SEC22A,FCHSD2,CCHCR1,ARL5A,KCNS3
GO:BP	establishment of protein localization to endoplasmic reticulum	GO:0072599	0.0070208708298906885	2.153609017049607	115	234	8	18123	RPL41,RPS14,RPL23A,RPL15,RPL10A,RPS3A,SSR3,SRPRB
GO:BP	establishment of protein localization to plasma membrane	GO:0061951	0.00801881790435393	2.0958896486053806	62	234	6	18123	GOLGA4,LYPLA1,GRIPAP1,ARFRP1,MACF1,RAB8A
GO:BP	regulation of chromosome organization	GO:0033044	0.00801881790435393	2.0958896486053806	299	234	13	18123	SMG1,ZNF207,NUMA1,UPF1,NIPBL,RIF1,RESF1,SMG6,PAF1,SMAD4,SLX1A,NSMCE2,MORC2
GO:BP	RNA catabolic process	GO:0006401	0.008524297480079263	2.069341402728064	431	234	16	18123	RPL41,SMG1,RPS14,UPF1,RPL23A,METTL16,PPP2CA,CNOT7,PSMC5,RPL15,RPL10A,RPS3A,SMG6,SSB,THRAP3,DAZ1
GO:BP	macromolecule localization	GO:0033036	0.008524297480079263	2.069341402728064	3148	234	63	18123	RPL41,APOC2,SELENOT,GOLGA4,SMG1,RPS14,SCYL1,CEP250,LYPLA1,NUMA1,UPF1,NIPBL,RANBP2,KIF3A,FKBP1A,CNIH4,GAK,GCC2,PPIA,RPL23A,TIMM8B,YWHAQ,MTX3,TTBK2,NASP,PEX2,CEP131,RAN,RRBP1,RPL15,GRIPAP1,ARFRP1,RER1,GOLGB1,MACF1,RPL10A,ARHGEF18,RPS3A,TIMM13,RAB8A,UBE2D2,KIF5B,SMG6,SSR3,CEP192,SRPRB,CANX,DHX38,SSB,NACA2,EVI5,NXF1,IFT140,PTPN11,PAF1,PPT1,DMAP1,SEC22A,FCHSD2,CCHCR1,ARL5A,KCNS3,SETD2
GO:BP	protein-containing complex subunit organization	GO:0043933	0.009007126542377925	2.045413735749591	2017	234	45	18123	APOC2,DMAC1,CNIH1,RPS14,GTF2A2,ZNF207,NUMA1,NDUFS7,SNRPG,UPF1,UBTF,RSF1,FKBP1A,GAK,LUC7L,RPL23A,NDUFC2,TTBK2,NASP,PSMC5,AXIN1,EIF3CL,EIF2S3B,EIF3A,TAF10,SDHAF4,TBCD,BDP1,KIF5B,CFL2,CEP192,PPAN,NCK1,LUC7L3,PTPN11,PAF1,SMAD4,DMAP1,FCHSD2,TBCA,KCNS3,SETD2,CAPZA1,RPA3,TMOD2
GO:BP	localization within membrane	GO:0051668	0.00948532328643682	2.022947862548337	775	234	23	18123	RPL41,GOLGA4,RPS14,LYPLA1,GAK,KIAA1109,RPL23A,TIMM8B,YWHAQ,PEX2,RPL15,GRIPAP1,ARFRP1,RER1,MACF1,RPL10A,RPS3A,TIMM13,RAB8A,KIF5B,SSR3,NACA2,ARL5A
GO:BP	ncRNA processing	GO:0034470	0.010008790420160297	1.9996184045977117	439	234	16	18123	RPL41,RPS14,KRI1,RPL23A,METTL16,RPL15,PELP1,RPL10A,INTS1,TBL3,BMS1,WDR46,SSB,PPAN,DDX54,TSR3
GO:BP	nucleocytoplasmic transport	GO:0006913	0.010519983889332299	1.9779849252753823	353	234	14	18123	SMG1,SNRPG,UPF1,RANBP2,RAN,SMG6,AKAP13,DHX38,SSB,NXF1,PTPN11,DMAP1,CCHCR1,SETD2
GO:BP	intracellular protein transport	GO:0006886	0.010700255750177131	1.9706058419817722	995	234	27	18123	RPL41,RPS14,RANBP2,KIF3A,GCC2,RPL23A,TIMM8B,YWHAQ,PEX2,CEP131,RAN,RPL15,GRIPAP1,ARFRP1,RPL10A,RPS3A,TIMM13,RAB8A,KIF5B,SSR3,SRPRB,NACA2,EVI5,PTPN11,DMAP1,CCHCR1,ARL5A
GO:BP	nuclear transport	GO:0051169	0.011144692697572421	1.9529319022029052	356	234	14	18123	SMG1,SNRPG,UPF1,RANBP2,RAN,SMG6,AKAP13,DHX38,SSB,NXF1,PTPN11,DMAP1,CCHCR1,SETD2
GO:BP	SRP-dependent cotranslational protein targeting to membrane	GO:0006614	0.011790284396843619	1.9284757190363606	96	234	7	18123	RPL41,RPS14,RPL23A,RPL15,RPL10A,RPS3A,SSR3
GO:BP	viral process	GO:0016032	0.013214354899156058	1.8789540334838581	1011	234	27	18123	RPL41,SUPT4H1,RPS14,GTF2A2,UPF1,RANBP2,RSF1,PPIA,RPL23A,ELOC,CNOT7,RAN,RPL15,HTATSF1,RPL10A,PCBP2,EIF3A,RESF1,RPS3A,UBXN1,CANX,SLC25A5,RBM15,SSB,NXF1,SETD2,MORC2
GO:BP	ribonucleoprotein complex subunit organization	GO:0071826	0.01478394910629684	1.8302095411789259	203	234	10	18123	RPS14,SNRPG,LUC7L,RPL23A,EIF3CL,EIF2S3B,EIF3A,KIF5B,PPAN,LUC7L3
GO:BP	IRES-dependent viral translational initiation	GO:0075522	0.01494083454836731	1.8256251435093591	11	234	3	18123	PCBP2,EIF3A,SSB
GO:BP	cellular component assembly	GO:0022607	0.015787261411520412	1.8016931997584242	3104	234	61	18123	APOC2,DMAC1,CNIH1,ALMS1,RPS14,GTF2A2,ZNF207,CEP250,NUMA1,NDUFS7,SNRPG,KIF3A,UBTF,RSF1,FKBP1A,GAK,LUC7L,RPL23A,NDUFC2,TTBK2,NASP,MBD3,CEP131,PPP2CA,CNOT7,RAN,PSMC5,AXIN1,EIF3CL,DAPK3,MACF1,EIF2S3B,ARHGEF18,EIF3A,TAF10,RESF1,SDHAF4,RAB8A,TBCD,BDP1,CFAP410,CFL2,CEP192,AKAP13,PPAN,NCK1,LUC7L3,IFT140,SLK,PTPN11,HDAC4,PAF1,SMAD4,FCHSD2,SLX1A,TBCA,KCNS3,CAPZA1,MORC2,RPA3,TMOD2
GO:BP	cotranslational protein targeting to membrane	GO:0006613	0.015787261411520412	1.8016931997584242	102	234	7	18123	RPL41,RPS14,RPL23A,RPL15,RPL10A,RPS3A,SSR3
GO:BP	telomere maintenance	GO:0000723	0.015787261411520412	1.8016931997584242	169	234	9	18123	SMG1,UPF1,RIF1,POLD1,TELO2,SMG6,SLX1A,NSMCE2,RPA3
GO:BP	cellular nitrogen compound biosynthetic process	GO:0044271	0.019570168557276103	1.7084054337605146	5054	234	89	18123	RPL41,SUPT4H1,SELENOT,SAFB2,HDGFL2,SAFB,RPS14,GTF2A2,ZNF627,ZBTB37,ATP5MG,SNRPG,UPF1,ZNF652,ZNF37A,NONO,NIPBL,UBTF,RSF1,RIF1,TCEAL4,PPIA,RPL23A,POLD1,YWHAQ,METTL16,CHD2,PEX2,MBD3,ELOC,ZNF221,RNF139,NFKBIL1,PPP2CA,CNOT7,EDF1,RRBP1,PURA,PSMC5,RPL15,AXIN1,POLR2J3,SAMD8,HTATSF1,EIF3CL,CDK11B,PELP1,ZNF707,GOLGB1,DAPK3,RPL10A,TELO2,EIF2S3B,INTS1,EIF3A,TAF10,RESF1,RPS3A,ZGPAT,BDP1,SMG6,RNF2,ZNF646,ATP5F…
GO:BP	cellular metabolic process	GO:0044237	0.019570168557276103	1.7084054337605146	10941	234	166	18123	RPL41,UQCRHL,LSM8,APOC2,SUPT4H1,SELENOT,BCKDHA,INO80D,SAFB2,SMG1,HDGFL2,SAFB,KCMF1,RPS14,FKBP2,GTF2A2,ZNF627,ZNF638,SREK1,SCYL1,N4BP2,ZBTB37,LYPLA1,ATP5MG,NDUFS7,SNRPG,COX7C,UPF1,ZNF652,RBM6,ZNF37A,NONO,NIPBL,RANBP2,KRI1,CSNK2A3,MMADHC,UBTF,MVD,RSF1,FKBP1A,GAK,RIF1,CRTAP,LUC7L,TCEAL4,CTNNBL1,PPIA,RPL23A,POLD1,NDUFC2,YWHAQ,TTC3,TTBK2,METTL16,NASP,CHD2,PEX2,MBD3,ELOC,ZNF221,SREK1IP1,RNF139,NFKBIL1,…
GO:BP	establishment of protein localization to organelle	GO:0072594	0.020104543982971897	1.6967057732412494	523	234	17	18123	RPL41,RPS14,NIPBL,RANBP2,GCC2,RPL23A,TIMM8B,YWHAQ,PEX2,RAN,RPL15,RPL10A,RPS3A,TIMM13,SSR3,SRPRB,DMAP1
GO:BP	protein localization to Golgi apparatus	GO:0034067	0.020978828422234214	1.6782187689530406	29	234	4	18123	GAK,GCC2,ARFRP1,ARL5A
GO:BP	nitrogen compound metabolic process	GO:0006807	0.021514595928820147	1.6672668061016032	10148	234	156	18123	RPL41,LSM8,SUPT4H1,SELENOT,BCKDHA,INO80D,SAFB2,SMG1,HDGFL2,SAFB,KCMF1,RPS14,FKBP2,GTF2A2,ZNF627,ZNF638,SREK1,SCYL1,N4BP2,ZBTB37,LYPLA1,ATP5MG,SNRPG,UPF1,ZNF652,RBM6,ZNF37A,NONO,NIPBL,RANBP2,KRI1,CSNK2A3,MMADHC,UBTF,MVD,RSF1,FKBP1A,GAK,RIF1,CRTAP,LUC7L,TCEAL4,CTNNBL1,PPIA,RPL23A,POLD1,YWHAQ,TTC3,TTBK2,METTL16,CHD2,PEX2,MBD3,ELOC,ZNF221,SREK1IP1,RNF139,NFKBIL1,PPP2CA,CNOT7,RAN,EDF1,RRBP1,PURA,PSMC5…
GO:BP	viral transcription	GO:0019083	0.02412232682851008	1.617580802666085	181	234	9	18123	RPL41,SUPT4H1,RPS14,RANBP2,RSF1,RPL23A,RPL15,RPL10A,RPS3A
GO:BP	regulation of nucleobase-containing compound metabolic process	GO:0019219	0.024154708366437436	1.6169982016306406	4123	234	75	18123	SUPT4H1,SAFB2,SMG1,HDGFL2,SAFB,RPS14,GTF2A2,ZNF627,ZBTB37,UPF1,ZNF652,ZNF37A,NONO,NIPBL,RANBP2,UBTF,RSF1,RIF1,PPIA,YWHAQ,METTL16,CHD2,PEX2,MBD3,ELOC,ZNF221,NFKBIL1,PPP2CA,CNOT7,EDF1,PURA,PSMC5,AXIN1,HTATSF1,CDK11B,PELP1,ZNF707,GOLGB1,DAPK3,DAZAP1,PCBP2,RESF1,ZGPAT,HNRNPLL,SMG6,RNF2,SNRNP70,ZNF646,EWSR1,RBM15,ZNF33A,PRAME,ZNF444,DDX54,ZBTB17,NCK1,ATAD2B,ZNF721,BTG1,HDAC4,PAF1,THRAP3,CLK1,SMAD4,DAZ…
GO:BP	mRNA-containing ribonucleoprotein complex export from nucleus	GO:0071427	0.024154708366437436	1.6169982016306406	112	234	7	18123	SMG1,UPF1,RANBP2,SMG6,DHX38,NXF1,SETD2
GO:BP	mRNA export from nucleus	GO:0006406	0.024154708366437436	1.6169982016306406	112	234	7	18123	SMG1,UPF1,RANBP2,SMG6,DHX38,NXF1,SETD2
GO:BP	RNA transport	GO:0050658	0.024154708366437436	1.6169982016306406	183	234	9	18123	SMG1,UPF1,RANBP2,RAN,SMG6,DHX38,SSB,NXF1,SETD2
GO:BP	nucleic acid transport	GO:0050657	0.024154708366437436	1.6169982016306406	183	234	9	18123	SMG1,UPF1,RANBP2,RAN,SMG6,DHX38,SSB,NXF1,SETD2
GO:BP	telomere organization	GO:0032200	0.024154708366437436	1.6169982016306406	183	234	9	18123	SMG1,UPF1,RIF1,POLD1,TELO2,SMG6,SLX1A,NSMCE2,RPA3
GO:BP	ncRNA metabolic process	GO:0034660	0.024154708366437436	1.6169982016306406	535	234	17	18123	RPL41,RPS14,KRI1,RPL23A,METTL16,RAN,RPL15,PELP1,RPL10A,INTS1,TBL3,BMS1,WDR46,SSB,PPAN,DDX54,TSR3
GO:BP	microtubule-based protein transport	GO:0099118	0.025762476325940514	1.5890123943012557	14	234	3	18123	KIF3A,CEP131,KIF5B
GO:BP	protein transport along microtubule	GO:0098840	0.025762476325940514	1.5890123943012557	14	234	3	18123	KIF3A,CEP131,KIF5B
GO:BP	establishment of RNA localization	GO:0051236	0.026174178411812236	1.5821269416191794	186	234	9	18123	SMG1,UPF1,RANBP2,RAN,SMG6,DHX38,SSB,NXF1,SETD2
GO:BP	protein targeting	GO:0006605	0.026515908604279315	1.5764934865893983	400	234	14	18123	RPL41,RPS14,GCC2,RPL23A,TIMM8B,YWHAQ,PEX2,RPL15,RPL10A,RPS3A,TIMM13,SSR3,SRPRB,NACA2
GO:BP	regulation of RNA splicing	GO:0043484	0.02924384846149891	1.5339654752294665	152	234	8	18123	METTL16,DAZAP1,HNRNPLL,SNRNP70,RBM15,THRAP3,CLK1,RBM12B
GO:BP	protein localization to centrosome	GO:0071539	0.029288956025273035	1.5332961080228542	33	234	4	18123	CEP250,CEP131,GOLGB1,CEP192
GO:BP	endonucleolytic cleavage involved in rRNA processing	GO:0000478	0.029944356758223375	1.5236850116615743	15	234	3	18123	KRI1,TBL3,BMS1
GO:BP	endonucleolytic cleavage of tricistronic rRNA transcript (SSU-rRNA, 5.8S rRNA, LSU-rRNA)	GO:0000479	0.029944356758223375	1.5236850116615743	15	234	3	18123	KRI1,TBL3,BMS1
GO:BP	positive regulation of chromosome organization	GO:2001252	0.030728047328933895	1.5124650369194554	192	234	9	18123	NUMA1,NIPBL,RIF1,RESF1,PAF1,SMAD4,SLX1A,NSMCE2,MORC2
GO:BP	inner mitochondrial membrane organization	GO:0007007	0.030728047328933895	1.5124650369194554	58	234	5	18123	ATP5MG,TIMM8B,MTX3,TIMM13,ATP5F1E
GO:BP	regulation of intracellular transport	GO:0032386	0.032331135027377965	1.4903790486369943	365	234	13	18123	NUMA1,KIF3A,GCC2,YWHAQ,RNF139,CEP131,RAN,GRIPAP1,KIF5B,PTPN11,DMAP1,ANTKMT,SETD2
GO:BP	regulation of cellular component organization	GO:0051128	0.032331135027377965	1.4903790486369943	2439	234	49	18123	APOC2,GOLGA4,ALMS1,SMG1,HDGFL2,ZNF207,NUMA1,UPF1,NIPBL,KIF3A,CSNK2A3,GAK,KIAA1109,RIF1,YWHAQ,TTBK2,CEP131,PPP2CA,PSMC5,GRIPAP1,CDK11B,DAPK3,MACF1,ARHGEF18,ARHGAP4,RESF1,TBCD,KIF5B,SMG6,CFL2,AKAP13,SLC25A5,NCK1,IFT140,SLK,PTPN11,ATAD2B,BTG1,HDAC4,PAF1,SMAD4,PPT1,FCHSD2,SLX1A,NSMCE2,CAPZA1,MORC2,RPA3,TMOD2
GO:BP	cytoplasmic translational initiation	GO:0002183	0.03359094890566634	1.473777727665512	35	234	4	18123	EIF3CL,EIF2S3B,EIF3A,NCK1
GO:BP	ribonucleoprotein complex assembly	GO:0022618	0.03359094890566634	1.473777727665512	196	234	9	18123	RPS14,SNRPG,LUC7L,RPL23A,EIF3CL,EIF2S3B,EIF3A,PPAN,LUC7L3
GO:BP	positive regulation of mRNA processing	GO:0050685	0.03359094890566634	1.473777727665512	35	234	4	18123	DAZAP1,SNRNP70,PAF1,THRAP3
GO:BP	organic substance transport	GO:0071702	0.038236498523610496	1.4175218847405897	2657	234	52	18123	RPL41,APOC2,SELENOT,GOLGA4,SMG1,RPS14,SLC38A10,LYPLA1,UPF1,RANBP2,KIF3A,CNIH4,GCC2,PPIA,RPL23A,TIMM8B,YWHAQ,MTX3,NASP,PEX2,CEP131,RAN,RRBP1,RPL15,GRIPAP1,ARFRP1,MACF1,RPL10A,RPS3A,TIMM13,RAB8A,KIF5B,SMG6,SSR3,SRPRB,CANX,SLC25A5,DHX38,SSB,NACA2,EVI5,NXF1,PTPN11,TMEM241,PPT1,DMAP1,SEC22A,FCHSD2,CCHCR1,ARL5A,KCNS3,SETD2
GO:BP	peptidyl-proline modification	GO:0018208	0.03889924583114564	1.4100588185855236	62	234	5	18123	FKBP2,RANBP2,FKBP1A,CRTAP,PPIA
GO:BP	chaperone-mediated protein folding	GO:0061077	0.0414274635919839	1.3827116556885721	63	234	5	18123	FKBP2,FKBP1A,GAK,CRTAP,DNAJC5
GO:BP	regulation of gene expression	GO:0010468	0.042212422351764534	1.3745597252249053	5218	234	89	18123	RPL41,SUPT4H1,SELENOT,SAFB2,SMG1,HDGFL2,SAFB,RPS14,CCDC88B,GTF2A2,ZNF627,ZBTB37,UPF1,ZNF652,ZNF37A,NONO,NIPBL,RANBP2,UBTF,RSF1,RIF1,PPIA,RPL23A,YWHAQ,METTL16,CHD2,PEX2,MBD3,ELOC,ZNF221,RNF139,NFKBIL1,PPP2CA,CNOT7,RAN,EDF1,PURA,PSMC5,RPL15,AXIN1,HTATSF1,CDK11B,PELP1,ZNF707,GOLGB1,DAPK3,DAZAP1,RPL10A,EIF2S3B,PCBP2,TAF10,RESF1,RPS3A,ZGPAT,HNRNPLL,SMG6,HELZ,TLR1,RNF2,SNRNP70,ZNF646,ATRAID,EWSR1,RBM15…
GO:BP	nucleobase-containing compound transport	GO:0015931	0.04317894963876769	1.3647279264213212	246	234	10	18123	SMG1,UPF1,RANBP2,RAN,SMG6,SLC25A5,DHX38,SSB,NXF1,SETD2
GO:BP	protein-containing complex assembly	GO:0065003	0.04400040852736074	1.356543291233021	1724	234	37	18123	APOC2,DMAC1,CNIH1,RPS14,GTF2A2,ZNF207,NUMA1,NDUFS7,SNRPG,UBTF,RSF1,FKBP1A,LUC7L,RPL23A,NDUFC2,NASP,PSMC5,AXIN1,EIF3CL,EIF2S3B,EIF3A,TAF10,SDHAF4,TBCD,BDP1,CEP192,PPAN,NCK1,LUC7L3,PTPN11,SMAD4,FCHSD2,TBCA,KCNS3,CAPZA1,RPA3,TMOD2
GO:BP	regulation of mRNA metabolic process	GO:1903311	0.046103174963881624	1.336269165243454	384	234	13	18123	SAFB2,SAFB,UPF1,METTL16,CNOT7,PSMC5,CDK11B,DAZAP1,SNRNP70,RBM15,PAF1,THRAP3,DAZ1
GO:BP	positive regulation of RNA splicing	GO:0033120	0.04708038569862405	1.3271599879250777	39	234	4	18123	DAZAP1,HNRNPLL,SNRNP70,THRAP3
GO:CC	intracellular anatomical structure	GO:0005622	2.9394814171485395e-15	14.531729280994668	14808	243	236	18964	RPL41,UQCRHL,LSM8,APOC2,SUPT4H1,SELENOT,BCKDHA,DMAC1,GOLGA4,INO80D,SAFB2,CNIH1,GOLGA3,ALMS1,SMG1,HDGFL2,SAFB,KCMF1,RPS14,CCDC88B,SLC38A10,FKBP2,GTF2A2,ZNF627,ZNF638,ZNF207,SREK1,SCYL1,N4BP2,ZBTB37,CEP250,LYPLA1,ATP5MG,NUMA1,NDUFS7,SNRPG,COX7C,UPF1,ZNF652,RBM6,ZNF37A,NONO,NIPBL,RANBP2,TCEAL3,ANKRD12,KRI1,KIF7,KIF3A,CSNK2A3,MMADHC,UBTF,MVD,RSF1,FKBP1A,CNIH4,GAK,KIAA1109,RIF1,CRTAP,LUC7L,GCC2,OLA1,T…
GO:CC	intracellular membrane-bounded organelle	GO:0043231	2.9394814171485395e-15	14.531729280994668	12046	243	213	18964	RPL41,UQCRHL,LSM8,APOC2,SUPT4H1,SELENOT,BCKDHA,DMAC1,GOLGA4,INO80D,SAFB2,CNIH1,GOLGA3,SMG1,HDGFL2,SAFB,KCMF1,RPS14,CCDC88B,SLC38A10,FKBP2,GTF2A2,ZNF627,ZNF638,ZNF207,SREK1,SCYL1,ZBTB37,LYPLA1,ATP5MG,NUMA1,NDUFS7,SNRPG,COX7C,UPF1,ZNF652,RBM6,ZNF37A,NONO,NIPBL,RANBP2,TCEAL3,ANKRD12,KRI1,CSNK2A3,MMADHC,UBTF,RSF1,FKBP1A,CNIH4,GAK,KIAA1109,RIF1,CRTAP,LUC7L,GCC2,OLA1,TCEAL4,CTNNBL1,PPIA,RPL23A,POLD1,TI…
GO:CC	intracellular organelle	GO:0043229	2.9394814171485395e-15	14.531729280994668	13117	243	223	18964	RPL41,UQCRHL,LSM8,APOC2,SUPT4H1,SELENOT,BCKDHA,DMAC1,GOLGA4,INO80D,SAFB2,CNIH1,GOLGA3,ALMS1,SMG1,HDGFL2,SAFB,KCMF1,RPS14,CCDC88B,SLC38A10,FKBP2,GTF2A2,ZNF627,ZNF638,ZNF207,SREK1,SCYL1,ZBTB37,CEP250,LYPLA1,ATP5MG,NUMA1,NDUFS7,SNRPG,COX7C,UPF1,ZNF652,RBM6,ZNF37A,NONO,NIPBL,RANBP2,TCEAL3,ANKRD12,KRI1,KIF7,KIF3A,CSNK2A3,MMADHC,UBTF,RSF1,FKBP1A,CNIH4,GAK,KIAA1109,RIF1,CRTAP,LUC7L,GCC2,OLA1,TCEAL4,CTNN…
GO:CC	membrane-bounded organelle	GO:0043227	4.648701597483057e-15	14.332668330505616	13201	243	223	18964	RPL41,UQCRHL,LSM8,APOC2,SUPT4H1,SELENOT,BCKDHA,DMAC1,GOLGA4,INO80D,SAFB2,CNIH1,GOLGA3,ALMS1,SMG1,HDGFL2,SAFB,KCMF1,POTEE,RPS14,CCDC88B,SLC38A10,FKBP2,GTF2A2,ZNF627,ZNF638,ZNF207,SREK1,SCYL1,ZBTB37,CEP250,LYPLA1,ATP5MG,NUMA1,NDUFS7,SNRPG,COX7C,UPF1,ZNF652,RBM6,ZNF37A,NONO,NIPBL,RANBP2,TCEAL3,ANKRD12,KRI1,KIF7,KIF3A,CSNK2A3,MMADHC,UBTF,RSF1,FKBP1A,CNIH4,GAK,KIAA1109,RIF1,CRTAP,LUC7L,GCC2,OLA1,TCEAL…
GO:CC	organelle	GO:0043226	1.894806401185928e-12	11.722435156773388	14027	243	226	18964	RPL41,UQCRHL,LSM8,APOC2,SUPT4H1,SELENOT,BCKDHA,DMAC1,GOLGA4,INO80D,SAFB2,CNIH1,GOLGA3,ALMS1,SMG1,HDGFL2,SAFB,KCMF1,POTEE,RPS14,CCDC88B,SLC38A10,FKBP2,GTF2A2,ZNF627,ZNF638,ZNF207,SREK1,SCYL1,ZBTB37,CEP250,LYPLA1,ATP5MG,NUMA1,NDUFS7,SNRPG,COX7C,UPF1,ZNF652,RBM6,ZNF37A,NONO,NIPBL,RANBP2,TCEAL3,ANKRD12,KRI1,KIF7,KIF3A,CSNK2A3,MMADHC,UBTF,RSF1,FKBP1A,CNIH4,GAK,KIAA1109,RIF1,CRTAP,LUC7L,GCC2,OLA1,TCEAL…
GO:CC	nucleus	GO:0005634	2.1924547449857857e-12	11.659069362251907	7607	243	156	18964	LSM8,SUPT4H1,GOLGA4,INO80D,SAFB2,GOLGA3,SMG1,HDGFL2,SAFB,RPS14,GTF2A2,ZNF627,ZNF638,ZNF207,SREK1,SCYL1,ZBTB37,LYPLA1,NUMA1,SNRPG,UPF1,ZNF652,RBM6,ZNF37A,NONO,NIPBL,RANBP2,TCEAL3,ANKRD12,KRI1,CSNK2A3,UBTF,RSF1,KIAA1109,RIF1,LUC7L,GCC2,OLA1,TCEAL4,CTNNBL1,PPIA,RPL23A,POLD1,CCDC137,COMMD4,PNISR,TTC3,TTBK2,METTL16,NASP,CHD2,PEX2,FAM50A,MBD3,ELOC,ZNF221,NFKBIL1,PPP2CA,CNOT7,SURF6,RAN,EDF1,PURA,PSMC5,R…
GO:CC	nuclear lumen	GO:0031981	1.2559412617609402e-11	10.901030671338962	4453	243	109	18964	LSM8,SUPT4H1,GOLGA4,INO80D,SAFB2,GOLGA3,SMG1,SAFB,RPS14,GTF2A2,ZNF638,ZNF207,SREK1,ZBTB37,NUMA1,SNRPG,UPF1,NONO,NIPBL,RANBP2,ANKRD12,KRI1,CSNK2A3,UBTF,RSF1,RIF1,GCC2,OLA1,CTNNBL1,RPL23A,POLD1,CCDC137,PNISR,TTC3,NASP,PEX2,FAM50A,MBD3,ELOC,NFKBIL1,CNOT7,SURF6,RAN,EDF1,PSMC5,GRIPAP1,UBXN7,POLR2J3,HTATSF1,MOB1B,PELP1,DAPK3,DAZAP1,TELO2,RGS12,MINDY2,PCBP2,INTS1,TBL3,EIF3A,UBN2,BMS1,PAXX,TAF10,RPS3A,ZG…
GO:CC	membrane-enclosed lumen	GO:0031974	6.09020867733093e-11	10.21536782627342	5579	243	124	18964	LSM8,SUPT4H1,BCKDHA,GOLGA4,INO80D,SAFB2,GOLGA3,SMG1,SAFB,KCMF1,RPS14,GTF2A2,ZNF638,ZNF207,SREK1,ZBTB37,NUMA1,NDUFS7,SNRPG,UPF1,NONO,NIPBL,RANBP2,ANKRD12,KRI1,CSNK2A3,UBTF,RSF1,RIF1,CRTAP,GCC2,OLA1,CTNNBL1,PPIA,RPL23A,POLD1,TIMM8B,CCDC137,PNISR,TTC3,NASP,PEX2,FAM50A,MBD3,ELOC,NFKBIL1,CNOT7,SURF6,RAN,EDF1,PSMC5,GRIPAP1,UBXN7,POLR2J3,HTATSF1,MOB1B,PELP1,DAPK3,DAZAP1,TELO2,RGS12,MINDY2,PCBP2,INTS1,TB…
GO:CC	organelle lumen	GO:0043233	6.09020867733093e-11	10.21536782627342	5579	243	124	18964	LSM8,SUPT4H1,BCKDHA,GOLGA4,INO80D,SAFB2,GOLGA3,SMG1,SAFB,KCMF1,RPS14,GTF2A2,ZNF638,ZNF207,SREK1,ZBTB37,NUMA1,NDUFS7,SNRPG,UPF1,NONO,NIPBL,RANBP2,ANKRD12,KRI1,CSNK2A3,UBTF,RSF1,RIF1,CRTAP,GCC2,OLA1,CTNNBL1,PPIA,RPL23A,POLD1,TIMM8B,CCDC137,PNISR,TTC3,NASP,PEX2,FAM50A,MBD3,ELOC,NFKBIL1,CNOT7,SURF6,RAN,EDF1,PSMC5,GRIPAP1,UBXN7,POLR2J3,HTATSF1,MOB1B,PELP1,DAPK3,DAZAP1,TELO2,RGS12,MINDY2,PCBP2,INTS1,TB…
GO:CC	intracellular organelle lumen	GO:0070013	6.09020867733093e-11	10.21536782627342	5579	243	124	18964	LSM8,SUPT4H1,BCKDHA,GOLGA4,INO80D,SAFB2,GOLGA3,SMG1,SAFB,KCMF1,RPS14,GTF2A2,ZNF638,ZNF207,SREK1,ZBTB37,NUMA1,NDUFS7,SNRPG,UPF1,NONO,NIPBL,RANBP2,ANKRD12,KRI1,CSNK2A3,UBTF,RSF1,RIF1,CRTAP,GCC2,OLA1,CTNNBL1,PPIA,RPL23A,POLD1,TIMM8B,CCDC137,PNISR,TTC3,NASP,PEX2,FAM50A,MBD3,ELOC,NFKBIL1,CNOT7,SURF6,RAN,EDF1,PSMC5,GRIPAP1,UBXN7,POLR2J3,HTATSF1,MOB1B,PELP1,DAPK3,DAZAP1,TELO2,RGS12,MINDY2,PCBP2,INTS1,TB…
GO:CC	nucleoplasm	GO:0005654	7.073573065855969e-10	9.150361156104283	4112	243	99	18964	LSM8,SUPT4H1,GOLGA4,INO80D,SAFB2,GOLGA3,SMG1,SAFB,RPS14,GTF2A2,ZNF638,ZNF207,SREK1,ZBTB37,NUMA1,SNRPG,UPF1,NONO,NIPBL,RANBP2,ANKRD12,CSNK2A3,UBTF,RSF1,RIF1,GCC2,CTNNBL1,POLD1,PNISR,TTC3,NASP,PEX2,FAM50A,MBD3,ELOC,NFKBIL1,CNOT7,SURF6,RAN,EDF1,PSMC5,GRIPAP1,UBXN7,POLR2J3,HTATSF1,MOB1B,PELP1,DAPK3,DAZAP1,TELO2,RGS12,MINDY2,PCBP2,INTS1,TBL3,EIF3A,UBN2,BMS1,PAXX,TAF10,RPS3A,ZGPAT,WDR46,BDP1,UBE2D2,SUG…
GO:CC	nuclear protein-containing complex	GO:0140513	0.000002700520583924136	5.568552508088176	1236	243	40	18964	LSM8,SUPT4H1,GTF2A2,SREK1,SNRPG,UPF1,NONO,NIPBL,RANBP2,RSF1,LUC7L,CTNNBL1,POLD1,PEX2,MBD3,ELOC,RAN,PSMC5,POLR2J3,HTATSF1,PELP1,TELO2,INTS1,CCDC12,PAXX,TAF10,SMG6,RNF2,SNRNP70,DHX38,NXF1,LUC7L3,HDAC4,PAF1,THRAP3,SMAD4,JMJD1C,DMAP1,SLX1A,RPA3
GO:CC	protein-containing complex	GO:0032991	0.000003321046011681581	5.478725107394392	5541	243	110	18964	RPL41,UQCRHL,LSM8,APOC2,SUPT4H1,BCKDHA,DMAC1,SMG1,RPS14,GTF2A2,SREK1,SCYL1,CEP250,ATP5MG,NUMA1,NDUFS7,SNRPG,COX7C,UPF1,NONO,NIPBL,RANBP2,KRI1,KIF7,KIF3A,CSNK2A3,RSF1,FKBP1A,CRTAP,LUC7L,CTNNBL1,PPIA,RPL23A,POLD1,TIMM8B,NDUFC2,YWHAQ,MTX3,NASP,PEX2,MBD3,ELOC,RNF139,PPP2CA,CNOT7,RAN,PSMC5,RPL15,AXIN1,UBXN7,POLR2J3,HTATSF1,EIF3CL,PELP1,DAZAP1,RPL10A,TELO2,EIF2S3B,INTS1,CCDC12,TBL3,PSENEN,EIF3A,BMS1,PA…
GO:CC	ribonucleoprotein complex	GO:1990904	0.0000036703923479269534	5.435287509199642	694	243	28	18964	RPL41,LSM8,RPS14,SREK1,SNRPG,UPF1,KRI1,LUC7L,CTNNBL1,RPL23A,RPL15,HTATSF1,EIF3CL,DAZAP1,RPL10A,CCDC12,TBL3,EIF3A,BMS1,RPS3A,WDR46,SMG6,SNRNP70,DHX38,SSB,PPAN,LUC7L3,RBM12B
GO:CC	intracellular non-membrane-bounded organelle	GO:0043232	0.00044158301898281624	3.354987635695198	5094	243	96	18964	RPL41,GOLGA3,ALMS1,RPS14,CCDC88B,ZNF207,SCYL1,ZBTB37,CEP250,NUMA1,SNRPG,UPF1,NONO,NIPBL,KRI1,KIF7,KIF3A,UBTF,RSF1,FKBP1A,RIF1,OLA1,CTNNBL1,RPL23A,POLD1,CCDC137,TTC3,TTBK2,NASP,MBD3,CEP131,PPP2CA,CNOT7,SURF6,RAN,EDF1,RRBP1,PURA,RPL15,MOB1B,PELP1,DAPK3,MACF1,RPL10A,TELO2,RGS12,ARHGEF18,ARHGAP4,TBL3,EIF3A,BMS1,PAXX,RESF1,RPS3A,ZGPAT,WDR46,TIMM13,RAB8A,TBCD,CFAP410,KIF5B,SMG6,HELZ,CFL2,CEP192,SRPRB,R…
GO:CC	non-membrane-bounded organelle	GO:0043228	0.00044368669364045773	3.3529235957711125	5102	243	96	18964	RPL41,GOLGA3,ALMS1,RPS14,CCDC88B,ZNF207,SCYL1,ZBTB37,CEP250,NUMA1,SNRPG,UPF1,NONO,NIPBL,KRI1,KIF7,KIF3A,UBTF,RSF1,FKBP1A,RIF1,OLA1,CTNNBL1,RPL23A,POLD1,CCDC137,TTC3,TTBK2,NASP,MBD3,CEP131,PPP2CA,CNOT7,SURF6,RAN,EDF1,RRBP1,PURA,RPL15,MOB1B,PELP1,DAPK3,MACF1,RPL10A,TELO2,RGS12,ARHGEF18,ARHGAP4,TBL3,EIF3A,BMS1,PAXX,RESF1,RPS3A,ZGPAT,WDR46,TIMM13,RAB8A,TBCD,CFAP410,KIF5B,SMG6,HELZ,CFL2,CEP192,SRPRB,R…
GO:CC	centriole	GO:0005814	0.0005683096038963836	3.245415004726057	143	243	10	18964	ALMS1,CEP250,KIF3A,TTBK2,CEP131,RAN,RAB8A,CEP192,IFT140,CCHCR1
GO:CC	cytosol	GO:0005829	0.0005946526906360291	3.2257366117159574	5361	243	99	18964	RPL41,GOLGA4,GOLGA3,ALMS1,SMG1,KCMF1,RPS14,SCYL1,N4BP2,CEP250,LYPLA1,NUMA1,SNRPG,UPF1,NIPBL,RANBP2,ANKRD12,KIF3A,CSNK2A3,MMADHC,MVD,FKBP1A,GAK,GCC2,OLA1,CTNNBL1,PPIA,RPL23A,POLD1,COMMD4,YWHAQ,PNISR,TTC3,TTBK2,PEX2,ELOC,CEP131,NFKBIL1,PPP2CA,CNOT7,RAN,EDF1,PSMC5,RPL15,AXIN1,GRIPAP1,UBXN7,SAMD8,ARFRP1,MOB1B,GOLGB1,DAZAP1,RPL10A,TELO2,RGS12,MINDY2,EIF2S3B,PCBP2,ARHGEF18,CYTH1,ARHGAP4,EIF3A,RPS3A,RAB…
GO:CC	U2-type prespliceosome	GO:0071004	0.001166169949592958	2.933238153872018	16	243	4	18964	SNRPG,LUC7L,SNRNP70,LUC7L3
GO:CC	spliceosomal complex	GO:0005681	0.001166169949592958	2.933238153872018	192	243	11	18964	LSM8,SREK1,SNRPG,UPF1,LUC7L,CTNNBL1,HTATSF1,CCDC12,SNRNP70,DHX38,LUC7L3
GO:CC	nucleolus	GO:0005730	0.001166169949592958	2.933238153872018	955	243	28	18964	GOLGA3,RPS14,ZNF207,NONO,KRI1,UBTF,OLA1,RPL23A,CCDC137,TTC3,SURF6,RAN,EDF1,MOB1B,PELP1,RGS12,TBL3,EIF3A,BMS1,RPS3A,WDR46,TIMM13,SMG6,EWSR1,PPAN,DDX54,TBCA,PPP1R26
GO:CC	prespliceosome	GO:0071010	0.001166169949592958	2.933238153872018	16	243	4	18964	SNRPG,LUC7L,SNRNP70,LUC7L3
GO:CC	U1 snRNP	GO:0005685	0.0023047845067968495	2.6373696741285677	19	243	4	18964	SNRPG,LUC7L,SNRNP70,LUC7L3
GO:CC	spliceosomal snRNP complex	GO:0097525	0.003231549617416998	2.490589171505202	61	243	6	18964	LSM8,SNRPG,LUC7L,HTATSF1,SNRNP70,LUC7L3
GO:CC	U2-type spliceosomal complex	GO:0005684	0.004677583955466938	2.329978408837295	93	243	7	18964	LSM8,SNRPG,LUC7L,HTATSF1,CCDC12,SNRNP70,LUC7L3
GO:CC	mitochondrial protein-containing complex	GO:0098798	0.004959022001971256	2.304603964845912	272	243	12	18964	UQCRHL,BCKDHA,DMAC1,ATP5MG,NDUFS7,COX7C,TIMM8B,NDUFC2,MTX3,TIMM13,ATP5F1E,SLC25A5
GO:CC	small nuclear ribonucleoprotein complex	GO:0030532	0.006163114441675932	2.2101997678645047	70	243	6	18964	LSM8,SNRPG,LUC7L,HTATSF1,SNRNP70,LUC7L3
GO:CC	microtubule cytoskeleton	GO:0015630	0.007429251873173114	2.1290549175599147	1313	243	32	18964	ALMS1,CCDC88B,ZNF207,SCYL1,CEP250,NUMA1,KIF7,KIF3A,RIF1,OLA1,CTNNBL1,TTBK2,CEP131,PPP2CA,RAN,MACF1,ARHGAP4,EIF3A,RESF1,RAB8A,TBCD,CFAP410,KIF5B,CEP192,SRPRB,SLC25A5,HYPK,EVI5,IFT140,SMAD4,TBCA,CCHCR1
GO:CC	inner mitochondrial membrane protein complex	GO:0098800	0.01192278187336991	1.9236224013661372	145	243	8	18964	UQCRHL,DMAC1,ATP5MG,NDUFS7,COX7C,NDUFC2,MTX3,ATP5F1E
GO:CC	Sm-like protein family complex	GO:0120114	0.013040264618730125	1.8847135956218697	82	243	6	18964	LSM8,SNRPG,LUC7L,HTATSF1,SNRNP70,LUC7L3
GO:CC	microtubule organizing center	GO:0005815	0.016256024887766167	1.7889856444963692	815	243	22	18964	ALMS1,CCDC88B,SCYL1,CEP250,NUMA1,KIF7,KIF3A,OLA1,CTNNBL1,TTBK2,CEP131,RAN,RESF1,RAB8A,TBCD,CFAP410,KIF5B,CEP192,EVI5,IFT140,SMAD4,CCHCR1
GO:CC	chromosome, telomeric region	GO:0000781	0.020548412115274473	1.6872217327279802	160	243	8	18964	UPF1,RIF1,POLD1,PURA,TELO2,SMG6,SSB,NSMCE2
GO:CC	mitochondrial intermembrane space protein transporter complex	GO:0042719	0.029224767537426734	1.5342489346610526	5	243	2	18964	TIMM8B,TIMM13
GO:CC	nuclear body	GO:0016604	0.03482588139652822	1.4580978833518197	816	243	21	18964	SAFB2,ZNF638,SREK1,NONO,RIF1,PNISR,CNOT7,UBXN7,DAPK3,TELO2,SUGP2,SCAPER,RNF2,SNRNP70,RBM15,NXF1,LUC7L3,STK19,HDAC4,THRAP3,NSMCE2
GO:CC	exon-exon junction complex	GO:0035145	0.034852094080755104	1.457771122289241	20	243	3	18964	UPF1,SMG6,THRAP3
GO:CC	cytosolic ribosome	GO:0022626	0.04106812492794374	1.3864951255378055	106	243	6	18964	RPL41,RPS14,RPL23A,RPL15,RPL10A,RPS3A
GO:CC	nuclear speck	GO:0016607	0.044051849920224685	1.3560358490390834	413	243	13	18964	ZNF638,SREK1,NONO,PNISR,CNOT7,SCAPER,SNRNP70,RBM15,NXF1,LUC7L3,STK19,HDAC4,THRAP3
GO:CC	cytoplasm	GO:0005737	0.04491244230244812	1.3476333277109123	11951	243	174	18964	RPL41,UQCRHL,APOC2,SELENOT,BCKDHA,DMAC1,GOLGA4,SAFB2,CNIH1,GOLGA3,ALMS1,SMG1,KCMF1,RPS14,CCDC88B,SLC38A10,FKBP2,ZNF638,ZNF207,SCYL1,N4BP2,CEP250,LYPLA1,ATP5MG,NUMA1,NDUFS7,SNRPG,COX7C,UPF1,NIPBL,RANBP2,ANKRD12,KIF7,KIF3A,CSNK2A3,MMADHC,MVD,FKBP1A,CNIH4,GAK,RIF1,CRTAP,GCC2,OLA1,CTNNBL1,PPIA,RPL23A,POLD1,TIMM8B,COMMD4,NDUFC2,YWHAQ,MTX3,PNISR,TTC3,TTBK2,METTL16,NASP,PEX2,MBD3,ELOC,RNF139,CEP131,NFKB…
REAC	Metabolism of RNA	REAC:R-HSA-8953854	0.0005138175552165099	3.289191061604485	662	143	26	10622	RPL41,LSM8,SMG1,RPS14,SNRPG,UPF1,RANBP2,CTNNBL1,RPL23A,PPP2CA,CNOT7,RAN,PSMC5,RPL15,PELP1,RPL10A,PCBP2,TBL3,BMS1,RPS3A,WDR46,SMG6,SNRNP70,DHX38,NXF1,TSR3
REAC	Nonsense-Mediated Decay (NMD)	REAC:R-HSA-927802	0.0009016172661705115	3.0449777800467146	116	143	10	10622	RPL41,SMG1,RPS14,UPF1,RPL23A,PPP2CA,RPL15,RPL10A,RPS3A,SMG6
REAC	Nonsense Mediated Decay (NMD) enhanced by the Exon Junction Complex (EJC)	REAC:R-HSA-975957	0.0009016172661705115	3.0449777800467146	116	143	10	10622	RPL41,SMG1,RPS14,UPF1,RPL23A,PPP2CA,RPL15,RPL10A,RPS3A,SMG6
REAC	rRNA processing in the nucleus and cytosol	REAC:R-HSA-8868773	0.01125462690049507	1.9486688976196544	193	143	11	10622	RPL41,RPS14,RPL23A,RPL15,PELP1,RPL10A,TBL3,BMS1,RPS3A,WDR46,TSR3
REAC	rRNA processing	REAC:R-HSA-72312	0.014201950263071769	1.8476520126358231	203	143	11	10622	RPL41,RPS14,RPL23A,RPL15,PELP1,RPL10A,TBL3,BMS1,RPS3A,WDR46,TSR3
REAC	SRP-dependent cotranslational protein targeting to membrane	REAC:R-HSA-1799339	0.0180390008462435	1.7437875210612659	113	143	8	10622	RPL41,RPS14,RPL23A,RPL15,RPL10A,RPS3A,SSR3,SRPRB
REAC	Metabolism of proteins	REAC:R-HSA-392499	0.019248047813600188	1.7156133111826941	2016	143	45	10622	RPL41,INO80D,CNIH1,SAFB,RPS14,RANBP2,MVD,RPL23A,COMMD4,PEX2,ELOC,RNF139,PSMC5,RPL15,AXIN1,UBXN7,GOLGB1,RPL10A,PSENEN,EIF3A,TAF10,RPS3A,RAB8A,TBCD,UBE2D2,KIF5B,SSR3,SRPRB,RNF2,UBXN1,CANX,GLB1,ASB1,DOHH,ENGASE,ZBTB17,HDAC4,PAF1,SMAD4,SEC22A,TULP4,USP34,TBCA,NSMCE2,CAPZA1
REAC	Major pathway of rRNA processing in the nucleolus and cytosol	REAC:R-HSA-6791226	0.019248047813600188	1.7156133111826941	183	143	10	10622	RPL41,RPS14,RPL23A,RPL15,PELP1,RPL10A,TBL3,BMS1,RPS3A,WDR46
REAC	Influenza Infection	REAC:R-HSA-168255	0.019248047813600188	1.7156133111826941	152	143	9	10622	RPL41,RPS14,RANBP2,RPL23A,RAN,RPL15,RPL10A,RPS3A,CANX
REAC	Nonsense Mediated Decay (NMD) independent of the Exon Junction Complex (EJC)	REAC:R-HSA-975956	0.023818126196849896	1.6230924080244455	96	143	7	10622	RPL41,RPS14,UPF1,RPL23A,RPL15,RPL10A,RPS3A
REAC	Formation of a pool of free 40S subunits	REAC:R-HSA-72689	0.03137629414708972	1.503398352224891	102	143	7	10622	RPL41,RPS14,RPL23A,RPL15,RPL10A,EIF3A,RPS3A
REAC	GTP hydrolysis and joining of the 60S ribosomal subunit	REAC:R-HSA-72706	0.04911980337804287	1.3087433803034096	113	143	7	10622	RPL41,RPS14,RPL23A,RPL15,RPL10A,EIF3A,RPS3A
REAC	L13a-mediated translational silencing of Ceruloplasmin expression	REAC:R-HSA-156827	0.04911980337804287	1.3087433803034096	112	143	7	10622	RPL41,RPS14,RPL23A,RPL15,RPL10A,EIF3A,RPS3A
WP	mRNA Processing	WP:WP411	0.01183761975371111	1.9267356144838885	133	100	9	7562	SREK1,SNRPG,NONO,PCBP2,SUGP2,SNRNP70,DHX38,NXF1,CLK1
TF	Factor: NRF-1; motif: SYGCGCMTGCGCRNNGSN	TF:M09641	9.244558299019148e-12	11.034113834410844	3253	255	94	19917	LSM8,SUPT4H1,MAGED4,SELENOT,BCKDHA,GOLGA4,SAFB2,CNIH1,SAFB,POTEE,FKBP2,CEP250,LYPLA1,ATP5MG,NDUFS7,UPF1,ZNF652,ANKRD12,KRI1,KIF3A,MMADHC,MVD,FKBP1A,GAK,LUC7L,PPIA,POLD1,TIMM8B,PNISR,PTRHD1,TTBK2,FAM50A,MBD3,RNF139,PPP2CA,RAN,RRBP1,PSMC5,UBXN7,POLR2J3,HTATSF1,CDK11B,PELP1,DAPK3,DAZAP1,RPL10A,TELO2,INTS1,PSENEN,EIF3A,UBN2,PAXX,RESF1,TIMM13,SDHAF4,RAB8A,CFAP410,KIF5B,SMG6,SUGP2,DNAJC5,SCAPER,CEP192,…
TF	Factor: TEL1; motif: CNCGGAANNN; match class: 1	TF:M02070_1	1.01944594432325e-11	10.991635797550895	4876	255	120	19917	RPL41,LSM8,APOC2,SUPT4H1,GOLGA4,CNIH1,GOLGA3,SMG1,KCMF1,RPS14,SLC38A10,FKBP2,GTF2A2,ZNF638,ZNF207,SREK1,SCYL1,N4BP2,LYPLA1,ATP5MG,UPF1,ZNF37A,NONO,NIPBL,TCEAL3,ANKRD12,KIF7,KIF3A,MMADHC,FKBP1A,GAK,GCC2,PPIA,RPL23A,TIMM8B,CCDC137,NDUFC2,YWHAQ,PNISR,PTRHD1,PEX2,MBD3,ELOC,ZNF221,PPP2CA,SURF6,PSMC5,AXIN1,GRIPAP1,SAMD8,ARFRP1,MOB1B,RER1,EIF3CL,CDK11B,CCDC9,MINDY2,INTS1,C3ORF38,ARHGEF18,CYTH1,TBL3,PSEN…
TF	Factor: NRF-1; motif: YGCGCMTGCGC	TF:M02102	5.026923588466845e-11	10.298697716196116	2040	255	69	19917	LSM8,SUPT4H1,MAGED4,SELENOT,SAFB2,CNIH1,SAFB,POTEE,FKBP2,CEP250,ATP5MG,NDUFS7,UPF1,ZNF652,KRI1,KIF3A,MMADHC,FKBP1A,GAK,KIAA1109,LUC7L,PPIA,POLD1,TIMM8B,PNISR,PTRHD1,TTBK2,MBD3,RNF139,PPP2CA,RAN,PSMC5,UBXN7,POLR2J3,HTATSF1,CDK11B,DAPK3,DAZAP1,RPL10A,TELO2,EIF3A,UBN2,TIMM13,SDHAF4,RAB8A,KIF5B,SMG6,SUGP2,DNAJC5,SCAPER,CEP192,OSER1,SNRNP70,ZNF646,AKAP13,EWSR1,GRINA,ZNF33A,ASB1,ZBTB17,NXF1,SLK,FUNDC2,…
TF	Factor: NRF-1; motif: CNCTGCGCATGCGC	TF:M04694	1.9259549518499282e-10	9.715353875254992	1568	255	58	19917	LSM8,SUPT4H1,MAGED4,SELENOT,BCKDHA,SAFB2,CNIH1,SAFB,POTEE,FKBP2,CEP250,ATP5MG,NDUFS7,UPF1,ZNF652,KRI1,KIF3A,MMADHC,MVD,FKBP1A,LUC7L,TIMM8B,PNISR,PTRHD1,MBD3,PPP2CA,UBXN7,POLR2J3,CDK11B,DAZAP1,RPL10A,TELO2,UBN2,TIMM13,SDHAF4,RAB8A,KIF5B,SMG6,SUGP2,DNAJC5,SCAPER,CEP192,OSER1,SNRNP70,ZNF646,EWSR1,GRINA,ZNF33A,ZBTB17,NXF1,HDAC4,FUNDC2,SMAD4,CKLF,TBCA,CCHCR1,ARL5A,NSMCE2
TF	Factor: NRF-1; motif: GCGCMTGCGCN	TF:M07052	8.875653655618883e-10	9.05179965308134	2141	255	68	19917	LSM8,MAGED4,SELENOT,BCKDHA,SAFB2,CNIH1,SAFB,POTEE,FKBP2,CEP250,LYPLA1,ATP5MG,NDUFS7,UPF1,ZNF652,KRI1,KIF3A,MMADHC,MVD,FKBP1A,GAK,LUC7L,PPIA,POLD1,TIMM8B,PNISR,PTRHD1,TTBK2,MBD3,RNF139,PPP2CA,RAN,UBXN7,POLR2J3,HTATSF1,CDK11B,DAPK3,DAZAP1,RPL10A,TELO2,UBN2,TIMM13,SDHAF4,RAB8A,KIF5B,SMG6,SUGP2,DNAJC5,SCAPER,CEP192,OSER1,SNRNP70,ZNF646,AKAP13,EWSR1,ZBTB17,NXF1,SLK,HDAC4,FUNDC2,CLK1,SMAD4,RBM12B,CKLF,…
TF	Factor: NRF-1; motif: CNSTGCGCATGCGCNNS	TF:M10018	8.875653655618883e-10	9.05179965308134	1838	255	62	19917	LSM8,SUPT4H1,MAGED4,SELENOT,BCKDHA,SAFB2,CNIH1,SAFB,POTEE,FKBP2,CEP250,ATP5MG,NDUFS7,UPF1,ZNF652,KRI1,KIF3A,MMADHC,MVD,FKBP1A,LUC7L,POLD1,TIMM8B,PNISR,PTRHD1,TTBK2,MBD3,PPP2CA,RAN,UBXN7,POLR2J3,CDK11B,DAZAP1,RPL10A,TELO2,UBN2,TIMM13,SDHAF4,RAB8A,KIF5B,SMG6,SUGP2,DNAJC5,SCAPER,CEP192,OSER1,SNRNP70,ZNF646,AKAP13,EWSR1,ZNF33A,ZBTB17,NXF1,HDAC4,FUNDC2,SMAD4,RBM12B,CKLF,TBCA,CCHCR1,ARL5A,NSMCE2
TF	Factor: NRF-1; motif: CNSTGCGCATGCGCNNS; match class: 1	TF:M10018_1	1.0874608939588233e-9	8.96358635170046	854	255	40	19917	LSM8,MAGED4,SELENOT,SAFB2,SAFB,CEP250,ATP5MG,NDUFS7,UPF1,ZNF652,KRI1,MMADHC,FKBP1A,LUC7L,POLD1,TIMM8B,PNISR,PTRHD1,TTBK2,MBD3,PPP2CA,RAN,UBXN7,POLR2J3,RPL10A,UBN2,TIMM13,RAB8A,KIF5B,SMG6,SUGP2,DNAJC5,OSER1,AKAP13,EWSR1,ZNF33A,ZBTB17,NXF1,CKLF,TBCA
TF	Factor: Erg; motif: NACCGGAARYN	TF:M11392	1.2161231109418207e-9	8.91502245820774	8777	255	168	19917	RPL41,LSM8,APOC2,SUPT4H1,MAGED4,SELENOT,DMAC1,GOLGA4,INO80D,CNIH1,GOLGA3,ALMS1,SMG1,HDGFL2,KCMF1,POTEE,RPS14,CCDC88B,SLC38A10,FKBP2,GTF2A2,ZNF638,SREK1,SCYL1,N4BP2,ZBTB37,LYPLA1,ATP5MG,NUMA1,NDUFS7,SNRPG,COX7C,UPF1,RBM6,NONO,NIPBL,ANKRD12,KRI1,MMADHC,MVD,FKBP1A,GAK,KIAA1109,RIF1,GCC2,PPIA,RPL23A,POLD1,TIMM8B,CCDC137,COMMD4,NDUFC2,MTX3,PNISR,TTBK2,METTL16,NASP,PEX2,ELOC,ZNF221,SREK1IP1,RNF139,CEP1…
TF	Factor: SAP-1; motif: NNCCGGAAGTGN; match class: 1	TF:M09905_1	1.6294086562664606e-9	8.787969980821023	3017	255	83	19917	RPL41,LSM8,APOC2,SUPT4H1,GOLGA3,ALMS1,KCMF1,RPS14,SLC38A10,FKBP2,GTF2A2,ZNF638,SREK1,N4BP2,ZBTB37,LYPLA1,NUMA1,SNRPG,COX7C,UPF1,RBM6,NIPBL,KRI1,FKBP1A,GAK,RPL23A,CCDC137,COMMD4,NDUFC2,MTX3,PNISR,NASP,PEX2,SREK1IP1,CNOT7,SURF6,RPL15,AXIN1,SAMD8,ARFRP1,RER1,CDK11B,ZNF707,CCDC9,INTS1,PSENEN,BMS1,PAXX,RPS3A,ZGPAT,WDR46,TIMM13,SUGP2,DNAJC5,SSR3,ZNF646,UBXN1,EWSR1,ASB1,PPAN,DDX54,HYPK,ENGASE,PTPN11,ATA…
TF	Factor: ZF5; motif: GSGCGCGR; match class: 1	TF:M00716_1	1.6294086562664606e-9	8.787969980821023	14230	255	228	19917	RPL41,LSM8,SUPT4H1,MAGED4,SELENOT,BCKDHA,DMAC1,INO80D,SAFB2,CNIH1,GOLGA3,ALMS1,SMG1,HDGFL2,SAFB,KCMF1,POTEE,RPS14,KIAA0232,SLC38A10,FKBP2,GTF2A2,ZNF627,ZNF638,ZNF207,SREK1,SCYL1,N4BP2,ZBTB37,CEP250,LYPLA1,ANKRD36C,NUMA1,NDUFS7,SNRPG,COX7C,UPF1,ZNF652,RBM6,ZNF37A,NONO,RANBP2,TCEAL3,ANKRD12,KRI1,KIF7,KIF3A,UBTF,MVD,RSF1,FKBP1A,CNIH4,GAK,RIF1,CRTAP,LUC7L,GCC2,OLA1,TCEAL4,CTNNBL1,PPIA,RPL23A,POLD1,CC…
TF	Factor: NRF-1; motif: YGCGCATGCGCN	TF:M04059	3.3645420828702367e-9	8.47307403527812	1478	255	53	19917	LSM8,MAGED4,SELENOT,BCKDHA,SAFB2,CNIH1,SAFB,FKBP2,ZNF638,CEP250,ATP5MG,NDUFS7,ZNF652,KRI1,KIF3A,MMADHC,MVD,FKBP1A,POLD1,TIMM8B,PNISR,PTRHD1,TTBK2,RNF139,RAN,UBXN7,POLR2J3,SAMD8,RPL10A,PSENEN,UBN2,TIMM13,RAB8A,KIF5B,SMG6,SUGP2,DNAJC5,OSER1,SNRNP70,ZNF646,AKAP13,EWSR1,ZNF33A,ZBTB17,NXF1,HDAC4,FUNDC2,SMAD4,RBM12B,CKLF,TBCA,CCHCR1,ARL5A
TF	Factor: SAP-1; motif: NNCCGGAAGTGN	TF:M09905	3.3645420828702367e-9	8.47307403527812	8354	255	161	19917	RPL41,LSM8,APOC2,SUPT4H1,MAGED4,SELENOT,BCKDHA,DMAC1,GOLGA4,CNIH1,GOLGA3,ALMS1,KCMF1,POTEE,RPS14,CCDC88B,SLC38A10,FKBP2,GTF2A2,ZNF627,ZNF638,SREK1,SCYL1,N4BP2,ZBTB37,LYPLA1,ATP5MG,NUMA1,SNRPG,COX7C,UPF1,RBM6,NONO,NIPBL,ANKRD12,KRI1,MMADHC,FKBP1A,GAK,KIAA1109,RIF1,GCC2,RPL23A,POLD1,TIMM8B,CCDC137,COMMD4,NDUFC2,MTX3,PNISR,PTRHD1,NASP,PEX2,MBD3,ELOC,ZNF221,SREK1IP1,RNF139,CEP131,NFKBIL1,ANKS3,CNOT7,…
TF	Factor: ZF5; motif: GGSGCGCGS; match class: 1	TF:M10438_1	4.555059755373479e-9	8.341505921378415	15001	255	234	19917	RPL41,LSM8,SUPT4H1,MAGED4,SELENOT,BCKDHA,DMAC1,GOLGA4,INO80D,SAFB2,CNIH1,GOLGA3,ALMS1,SMG1,HDGFL2,SAFB,KCMF1,POTEE,RPS14,KIAA0232,SLC38A10,FKBP2,GTF2A2,ZNF627,ZNF638,ZNF207,SREK1,SCYL1,N4BP2,ZBTB37,CEP250,LYPLA1,ANKRD36C,ATP5MG,NUMA1,NDUFS7,SNRPG,COX7C,UPF1,ZNF652,RBM6,ZNF37A,NONO,NIPBL,RANBP2,TCEAL3,ANKRD12,KRI1,KIF7,KIF3A,MMADHC,UBTF,MVD,RSF1,FKBP1A,CNIH4,GAK,RIF1,CRTAP,LUC7L,GCC2,OLA1,TCEAL4,C…
TF	Factor: Elk-1; motif: NNCCGGAAGTN; match class: 1	TF:M11435_1	5.4161090240258475e-9	8.266312602067325	5791	255	125	19917	APOC2,SUPT4H1,MAGED4,DMAC1,GOLGA4,GOLGA3,ALMS1,KCMF1,RPS14,CCDC88B,KIAA0232,SLC38A10,FKBP2,GTF2A2,ZNF207,SREK1,SCYL1,N4BP2,ZBTB37,LYPLA1,ATP5MG,NUMA1,SNRPG,COX7C,UPF1,NONO,NIPBL,TCEAL3,KRI1,KIF7,MMADHC,FKBP1A,GAK,KIAA1109,CRTAP,GCC2,OLA1,PPIA,RPL23A,POLD1,TIMM8B,CCDC137,COMMD4,MTX3,PNISR,PTRHD1,NASP,PEX2,MBD3,ELOC,CEP131,NFKBIL1,PPP2CA,SURF6,RRBP1,PSMC5,RPL15,AXIN1,GRIPAP1,SAMD8,ARFRP1,RER1,CDK11…
TF	Factor: Elk-1; motif: NNCCGGAAGTN	TF:M11435	5.4161090240258475e-9	8.266312602067325	11838	255	202	19917	RPL41,LSM8,APOC2,SUPT4H1,MAGED4,BCKDHA,DMAC1,GOLGA4,CNIH1,GOLGA3,ALMS1,HDGFL2,KCMF1,POTEE,RPS14,CCDC88B,KIAA0232,SLC38A10,FKBP2,GTF2A2,ZNF638,ZNF207,SREK1,SCYL1,N4BP2,ZBTB37,CEP250,LYPLA1,ATP5MG,NUMA1,NDUFS7,SNRPG,COX7C,UPF1,RBM6,NONO,NIPBL,TCEAL3,ANKRD12,KRI1,KIF7,CSNK2A3,MMADHC,UBTF,FKBP1A,CNIH4,GAK,KIAA1109,RIF1,CRTAP,GCC2,OLA1,TCEAL4,CTNNBL1,PPIA,RPL23A,POLD1,TIMM8B,CCDC137,COMMD4,NDUFC2,YWHA…
TF	Factor: E2F-2; motif: GCGCGCGCNCS; match class: 1	TF:M11529_1	5.4161090240258475e-9	8.266312602067325	14592	255	230	19917	UQCRHL,LSM8,SUPT4H1,MAGED4,SELENOT,BCKDHA,DMAC1,GOLGA4,INO80D,SAFB2,CNIH1,GOLGA3,ALMS1,SMG1,HDGFL2,SAFB,KCMF1,POTEE,RPS14,CCDC88B,KIAA0232,SLC38A10,FKBP2,GTF2A2,ZNF627,ZNF638,SREK1,SCYL1,N4BP2,ZBTB37,CEP250,LYPLA1,ANKRD36C,NUMA1,NDUFS7,SNRPG,COX7C,UPF1,ZNF652,RBM6,ZNF37A,NONO,NIPBL,RANBP2,TCEAL3,ANKRD12,KRI1,KIF7,KIF3A,UBTF,MVD,RSF1,FKBP1A,CNIH4,GAK,KIAA1109,RIF1,CRTAP,LUC7L,GCC2,OLA1,TCEAL4,CTNN…
TF	Factor: PEA3; motif: NACCGGAAGTN; match class: 1	TF:M11425_1	7.1279816660461435e-9	8.147033426022983	2351	255	69	19917	APOC2,SUPT4H1,DMAC1,GOLGA4,GOLGA3,ALMS1,HDGFL2,KCMF1,RPS14,SLC38A10,FKBP2,GTF2A2,SREK1,N4BP2,ZBTB37,LYPLA1,ATP5MG,SNRPG,NIPBL,FKBP1A,GAK,RPL23A,CCDC137,PNISR,NASP,PEX2,ELOC,NFKBIL1,AXIN1,POLR2J3,SAMD8,ARFRP1,RER1,CDK11B,ZNF707,CCDC9,INTS1,C3ORF38,ARHGAP4,PSENEN,PAXX,RPS3A,ZGPAT,WDR46,TIMM13,RAB8A,SUGP2,SSR3,ZNF646,CANX,EWSR1,ASB1,PPAN,DDX54,HYPK,PTPN11,ATAD2B,ZNF721,STK19,CYTH2,FUNDC2,DMAP1,SLX1A…
TF	Factor: E2F-2; motif: GCGCGCGCGYW; match class: 1	TF:M11531_1	7.1279816660461435e-9	8.147033426022983	12431	255	208	19917	RPL41,LSM8,MAGED4,SELENOT,BCKDHA,DMAC1,GOLGA4,INO80D,SAFB2,CNIH1,GOLGA3,ALMS1,SMG1,HDGFL2,SAFB,KCMF1,POTEE,KIAA0232,SLC38A10,GTF2A2,ZNF638,ZNF207,SREK1,N4BP2,ZBTB37,LYPLA1,ANKRD36C,ATP5MG,NUMA1,SNRPG,COX7C,UPF1,ZNF652,RBM6,ZNF37A,NONO,NIPBL,RANBP2,TCEAL3,ANKRD12,KRI1,KIF7,KIF3A,MMADHC,UBTF,MVD,FKBP1A,CNIH4,GAK,RIF1,CRTAP,LUC7L,GCC2,OLA1,TCEAL4,PPIA,RPL23A,POLD1,CCDC137,NDUFC2,YWHAQ,MTX3,PNISR,PTR…
TF	Factor: FLI1; motif: ACCGGAARTN	TF:M03988	7.248686659720556e-9	8.139740673167546	8401	255	160	19917	RPL41,LSM8,APOC2,SUPT4H1,MAGED4,DMAC1,INO80D,CNIH1,GOLGA3,ALMS1,HDGFL2,KCMF1,POTEE,RPS14,CCDC88B,SLC38A10,FKBP2,GTF2A2,ZNF638,SREK1,SCYL1,N4BP2,ZBTB37,LYPLA1,ATP5MG,NUMA1,NDUFS7,SNRPG,COX7C,UPF1,RBM6,NONO,NIPBL,ANKRD12,MMADHC,MVD,FKBP1A,GAK,KIAA1109,RIF1,GCC2,PPIA,RPL23A,POLD1,TIMM8B,CCDC137,COMMD4,NDUFC2,MTX3,PNISR,TTBK2,NASP,CHD2,PEX2,ELOC,ZNF221,SREK1IP1,RNF139,CEP131,NFKBIL1,ANKS3,CNOT7,SURF6…
TF	Factor: PEA3; motif: RCCGGAAGYN	TF:M02066	7.248686659720556e-9	8.139740673167546	7124	255	143	19917	RPL41,LSM8,APOC2,SUPT4H1,MAGED4,BCKDHA,DMAC1,GOLGA4,CNIH1,GOLGA3,ALMS1,HDGFL2,KCMF1,POTEE,RPS14,CCDC88B,SLC38A10,FKBP2,GTF2A2,ZNF638,SREK1,SCYL1,N4BP2,ZBTB37,LYPLA1,ATP5MG,NUMA1,SNRPG,COX7C,UPF1,RBM6,NONO,NIPBL,ANKRD12,MMADHC,FKBP1A,GAK,RIF1,GCC2,RPL23A,POLD1,TIMM8B,CCDC137,MTX3,PNISR,PTRHD1,NASP,PEX2,ELOC,ZNF221,RNF139,CEP131,NFKBIL1,ANKS3,SURF6,PSMC5,RPL15,AXIN1,GRIPAP1,UBXN7,SAMD8,ARFRP1,MOB1B…
TF	Factor: E2F-1:DP-1; motif: TTTCSCGC	TF:M00736	7.248686659720556e-9	8.139740673167546	10495	255	186	19917	RPL41,LSM8,APOC2,SUPT4H1,MAGED4,DMAC1,INO80D,SAFB2,CNIH1,GOLGA3,ALMS1,HDGFL2,SAFB,KCMF1,POTEE,SLC38A10,FKBP2,ZNF638,ZNF207,SREK1,SCYL1,N4BP2,CEP250,LYPLA1,ANKRD36C,ATP5MG,NUMA1,COX7C,ZNF652,ZNF37A,NONO,NIPBL,RANBP2,ANKRD12,KRI1,KIF7,KIF3A,CSNK2A3,MMADHC,UBTF,RSF1,GAK,RIF1,CRTAP,LUC7L,GCC2,OLA1,CTNNBL1,PPIA,RPL23A,POLD1,TIMM8B,CCDC137,COMMD4,NDUFC2,YWHAQ,MTX3,PTRHD1,TTBK2,METTL16,NASP,PEX2,MBD3,EL…
TF	Factor: Elf-1; motif: AWCCCGGAAGTN; match class: 1	TF:M07415_1	7.248686659720556e-9	8.139740673167546	2415	255	70	19917	SUPT4H1,GOLGA3,ALMS1,KCMF1,RPS14,CCDC88B,SLC38A10,FKBP2,GTF2A2,ZNF638,SREK1,N4BP2,ZBTB37,LYPLA1,NUMA1,SNRPG,FKBP1A,GAK,RPL23A,TIMM8B,PNISR,NASP,PEX2,PSMC5,AXIN1,POLR2J3,SAMD8,ARFRP1,RER1,CDK11B,ZNF707,DAZAP1,CCDC9,INTS1,C3ORF38,PSENEN,PAXX,RPS3A,ZGPAT,WDR46,TIMM13,SUGP2,DNAJC5,SSR3,ZNF646,AKAP13,SLC25A5,EWSR1,ASB1,PPAN,DDX54,DOHH,CMC4,HYPK,PTPN11,ATAD2B,STK19,C6ORF47,FUNDC2,ARHGAP45,DMAP1,FCHSD2,…
TF	Factor: FLI-1; motif: NAYTTCCGGT	TF:M08913	7.248686659720556e-9	8.139740673167546	8401	255	160	19917	RPL41,LSM8,APOC2,SUPT4H1,MAGED4,BCKDHA,DMAC1,GOLGA4,INO80D,CNIH1,GOLGA3,ALMS1,HDGFL2,KCMF1,POTEE,RPS14,CCDC88B,SLC38A10,FKBP2,GTF2A2,ZNF638,SREK1,SCYL1,N4BP2,ZBTB37,LYPLA1,ATP5MG,NUMA1,SNRPG,COX7C,UPF1,RBM6,NONO,NIPBL,ANKRD12,MMADHC,MVD,FKBP1A,GAK,KIAA1109,RIF1,GCC2,PPIA,RPL23A,POLD1,TIMM8B,CCDC137,COMMD4,NDUFC2,MTX3,PNISR,PTRHD1,TTBK2,NASP,PEX2,ELOC,ZNF221,SREK1IP1,RNF139,CEP131,NFKBIL1,ANKS3,CN…
TF	Factor: EHF; motif: CSCGGAARTN; match class: 1	TF:M02052_1	9.116127017668012e-9	8.040189632297276	4086	255	98	19917	RPL41,APOC2,SUPT4H1,DMAC1,GOLGA4,GOLGA3,ALMS1,KCMF1,RPS14,KIAA0232,SLC38A10,FKBP2,GTF2A2,ZNF638,SREK1,SCYL1,N4BP2,ZBTB37,LYPLA1,ATP5MG,NUMA1,SNRPG,COX7C,UPF1,NIPBL,KIF7,MMADHC,FKBP1A,GAK,GCC2,PPIA,CCDC137,MTX3,PNISR,PTRHD1,NASP,PEX2,ELOC,CEP131,PSMC5,AXIN1,GRIPAP1,ARFRP1,RER1,CDK11B,ZNF707,CCDC9,INTS1,C3ORF38,TBL3,PSENEN,BMS1,PAXX,TAF10,RESF1,RPS3A,ZGPAT,WDR46,TIMM13,HNRNPLL,CFAP410,DNAJC5,SSR3,C…
TF	Factor: Fli-1; motif: NACCGGAARTN	TF:M11400	9.797483708645924e-9	8.008885449998475	10042	255	180	19917	RPL41,LSM8,APOC2,SUPT4H1,MAGED4,SELENOT,DMAC1,GOLGA4,INO80D,CNIH1,GOLGA3,ALMS1,SMG1,HDGFL2,KCMF1,POTEE,RPS14,CCDC88B,SLC38A10,FKBP2,GTF2A2,ZNF627,ZNF638,SREK1,SCYL1,N4BP2,ZBTB37,LYPLA1,ATP5MG,NUMA1,NDUFS7,SNRPG,COX7C,UPF1,RBM6,NONO,NIPBL,ANKRD12,KRI1,MMADHC,MVD,RSF1,FKBP1A,CNIH4,GAK,KIAA1109,RIF1,GCC2,PPIA,RPL23A,POLD1,TIMM8B,CCDC137,COMMD4,NDUFC2,MTX3,PNISR,TTBK2,METTL16,NASP,PEX2,ELOC,ZNF221,SR…
TF	Factor: Fli-1; motif: NACCGGAARTN	TF:M11404	9.797483708645924e-9	8.008885449998475	8828	255	165	19917	RPL41,LSM8,APOC2,SUPT4H1,MAGED4,DMAC1,GOLGA4,INO80D,CNIH1,GOLGA3,ALMS1,HDGFL2,KCMF1,POTEE,RPS14,CCDC88B,SLC38A10,FKBP2,GTF2A2,ZNF638,SREK1,SCYL1,N4BP2,ZBTB37,LYPLA1,ATP5MG,NUMA1,NDUFS7,SNRPG,COX7C,UPF1,RBM6,NONO,NIPBL,ANKRD12,MMADHC,MVD,FKBP1A,GAK,KIAA1109,RIF1,GCC2,PPIA,RPL23A,POLD1,TIMM8B,CCDC137,COMMD4,NDUFC2,MTX3,PNISR,TTBK2,NASP,CHD2,PEX2,ELOC,ZNF221,SREK1IP1,RNF139,CEP131,NFKBIL1,ANKS3,CNOT…
TF	Factor: nerf; motif: NRRNSCGGAAGNRNNNN	TF:M09606	1.0738262548533149e-8	7.969065981823215	6310	255	131	19917	RPL41,APOC2,SUPT4H1,MAGED4,BCKDHA,DMAC1,GOLGA4,ALMS1,KCMF1,RPS14,CCDC88B,KIAA0232,SLC38A10,FKBP2,GTF2A2,ZNF638,SREK1,SCYL1,N4BP2,ZBTB37,LYPLA1,NUMA1,SNRPG,COX7C,UPF1,NIPBL,KIF7,MMADHC,FKBP1A,GAK,RIF1,GCC2,OLA1,TCEAL4,CTNNBL1,PPIA,RPL23A,POLD1,TIMM8B,CCDC137,YWHAQ,PNISR,PTRHD1,NASP,PEX2,MBD3,ZNF221,CEP131,SURF6,RAN,RRBP1,PSMC5,RPL15,AXIN1,GRIPAP1,POLR2J3,SAMD8,ARFRP1,MOB1B,RER1,EIF3CL,CDK11B,ZNF70…
TF	Factor: Erm; motif: NNSCGGAWGYN	TF:M11424	1.0738262548533149e-8	7.969065981823215	8225	255	157	19917	RPL41,LSM8,APOC2,SUPT4H1,MAGED4,BCKDHA,DMAC1,GOLGA4,GOLGA3,ALMS1,KCMF1,RPS14,CCDC88B,KIAA0232,SLC38A10,FKBP2,GTF2A2,ZNF638,SREK1,SCYL1,N4BP2,ZBTB37,LYPLA1,ATP5MG,NUMA1,SNRPG,COX7C,UPF1,NIPBL,TCEAL3,KRI1,KIF7,MMADHC,FKBP1A,GAK,KIAA1109,RIF1,CRTAP,GCC2,TCEAL4,CTNNBL1,RPL23A,POLD1,TIMM8B,CCDC137,MTX3,PNISR,PTRHD1,NASP,PEX2,ELOC,ZNF221,RNF139,CEP131,NFKBIL1,PPP2CA,SURF6,RAN,PSMC5,RPL15,AXIN1,GRIPAP1,…
TF	Factor: FLI-1; motif: NAYTTCCGGT; match class: 1	TF:M08913_1	1.1226109448658445e-8	7.949770727953092	3083	255	81	19917	APOC2,SUPT4H1,DMAC1,GOLGA4,GOLGA3,KCMF1,RPS14,SLC38A10,FKBP2,GTF2A2,SREK1,N4BP2,ZBTB37,LYPLA1,ATP5MG,SNRPG,COX7C,NIPBL,FKBP1A,GAK,PPIA,RPL23A,CCDC137,COMMD4,MTX3,PNISR,NASP,PEX2,ELOC,NFKBIL1,SURF6,PSMC5,RPL15,AXIN1,SAMD8,ARFRP1,RER1,CDK11B,ZNF707,CCDC9,INTS1,C3ORF38,PSENEN,UBN2,BMS1,PAXX,RPS3A,ZGPAT,WDR46,TIMM13,SUGP2,DNAJC5,SSR3,ZNF646,UBXN1,EWSR1,ASB1,PPAN,DDX54,HYPK,ENGASE,PTPN11,ATAD2B,ZNF721…
TF	Factor: E2F-2; motif: GCGCGCGCGYW	TF:M11531	1.1226109448658445e-8	7.949770727953092	13379	255	217	19917	RPL41,LSM8,MAGED4,SELENOT,BCKDHA,DMAC1,GOLGA4,INO80D,SAFB2,CNIH1,GOLGA3,ALMS1,SMG1,HDGFL2,SAFB,KCMF1,POTEE,KIAA0232,SLC38A10,GTF2A2,ZNF627,ZNF638,ZNF207,SREK1,N4BP2,ZBTB37,LYPLA1,ANKRD36C,ATP5MG,NUMA1,NDUFS7,SNRPG,COX7C,UPF1,ZNF652,RBM6,ZNF37A,NONO,NIPBL,RANBP2,TCEAL3,ANKRD12,KRI1,KIF7,KIF3A,MMADHC,UBTF,MVD,FKBP1A,CNIH4,GAK,RIF1,CRTAP,LUC7L,GCC2,OLA1,TCEAL4,PPIA,RPL23A,POLD1,CCDC137,NDUFC2,YWHAQ,…
TF	Factor: GABP-alpha; motif: CTTCCK; match class: 1	TF:M01660_1	1.2279050504665532e-8	7.910835214345269	5163	255	114	19917	RPL41,APOC2,SUPT4H1,DMAC1,GOLGA4,GOLGA3,ALMS1,KCMF1,RPS14,CCDC88B,KIAA0232,SLC38A10,FKBP2,GTF2A2,ZNF207,SREK1,SCYL1,N4BP2,ZBTB37,LYPLA1,ATP5MG,NUMA1,SNRPG,UPF1,NONO,NIPBL,TCEAL3,KIF7,MMADHC,FKBP1A,GAK,CRTAP,GCC2,OLA1,PPIA,RPL23A,POLD1,TIMM8B,CCDC137,COMMD4,MTX3,PNISR,PTRHD1,NASP,PEX2,MBD3,ELOC,CEP131,NFKBIL1,SURF6,PSMC5,AXIN1,GRIPAP1,ARFRP1,RER1,CDK11B,ZNF707,DAZAP1,CCDC9,MINDY2,INTS1,C3ORF38,TBL…
TF	Factor: ELK-1; motif: ACCGGAAGTN	TF:M02059	1.2556409362665686e-8	7.901134533920647	9512	255	173	19917	RPL41,LSM8,APOC2,SUPT4H1,MAGED4,BCKDHA,DMAC1,GOLGA4,INO80D,CNIH1,GOLGA3,ALMS1,HDGFL2,KCMF1,POTEE,RPS14,CCDC88B,SLC38A10,FKBP2,GTF2A2,ZNF638,ZNF207,SREK1,SCYL1,N4BP2,ZBTB37,LYPLA1,ATP5MG,NUMA1,NDUFS7,SNRPG,COX7C,UPF1,RBM6,NONO,NIPBL,ANKRD12,KRI1,MMADHC,MVD,FKBP1A,GAK,KIAA1109,RIF1,GCC2,OLA1,PPIA,RPL23A,POLD1,TIMM8B,CCDC137,COMMD4,NDUFC2,MTX3,PNISR,PTRHD1,TTBK2,NASP,PEX2,MBD3,ELOC,ZNF221,RNF139,CEP…
TF	Factor: E2F-4; motif: NTTTCSCGCC; match class: 1	TF:M07380_1	1.5796453763193302e-8	7.8014403993707635	8046	255	154	19917	RPL41,SUPT4H1,SELENOT,INO80D,SAFB2,GOLGA3,ALMS1,SMG1,HDGFL2,SAFB,KCMF1,RPS14,KIAA0232,SLC38A10,FKBP2,GTF2A2,ZNF627,ZNF638,ZNF207,SCYL1,N4BP2,ZBTB37,CEP250,ANKRD36C,ATP5MG,NUMA1,NDUFS7,SNRPG,UPF1,RBM6,ZNF37A,NONO,NIPBL,RANBP2,ANKRD12,KRI1,UBTF,MVD,RSF1,FKBP1A,GAK,RIF1,CRTAP,LUC7L,GCC2,OLA1,PPIA,POLD1,CCDC137,COMMD4,YWHAQ,PNISR,PTRHD1,TTBK2,NASP,MBD3,ELOC,CEP131,NFKBIL1,PPP2CA,CNOT7,RAN,EDF1,RRBP1,…
TF	Factor: Elk-1; motif: NRSCGGAAGNN	TF:M11434	1.7971117746034264e-8	7.745424910323502	8290	255	157	19917	RPL41,LSM8,APOC2,SUPT4H1,BCKDHA,DMAC1,GOLGA4,GOLGA3,ALMS1,HDGFL2,KCMF1,RPS14,CCDC88B,KIAA0232,SLC38A10,FKBP2,GTF2A2,ZNF638,ZNF207,SREK1,SCYL1,N4BP2,ZBTB37,LYPLA1,ATP5MG,NUMA1,SNRPG,COX7C,UPF1,NIPBL,KRI1,MMADHC,FKBP1A,GAK,RIF1,CRTAP,GCC2,OLA1,TCEAL4,CTNNBL1,PPIA,RPL23A,POLD1,TIMM8B,CCDC137,COMMD4,MTX3,PNISR,PTRHD1,NASP,PEX2,MBD3,ELOC,ZNF221,CEP131,NFKBIL1,PPP2CA,SURF6,RAN,RRBP1,PSMC5,RPL15,AXIN1,G…
TF	Factor: Elk-1; motif: NNNNCCGGAARTNN; match class: 1	TF:M00025_1	1.8069395697761454e-8	7.743056371485337	4674	255	106	19917	RPL41,LSM8,APOC2,SUPT4H1,MAGED4,DMAC1,GOLGA4,INO80D,GOLGA3,ALMS1,KCMF1,RPS14,SLC38A10,FKBP2,GTF2A2,ZNF638,SREK1,N4BP2,ZBTB37,LYPLA1,ATP5MG,SNRPG,COX7C,UPF1,RBM6,NIPBL,KRI1,FKBP1A,GAK,KIAA1109,GCC2,PPIA,RPL23A,TIMM8B,CCDC137,COMMD4,NDUFC2,MTX3,PNISR,NASP,PEX2,ELOC,SREK1IP1,RNF139,SURF6,PSMC5,RPL15,AXIN1,SAMD8,ARFRP1,RER1,CDK11B,ZNF707,DAZAP1,CCDC9,RPL10A,INTS1,C3ORF38,TBL3,PSENEN,EIF3A,UBN2,BMS1,P…
TF	Factor: Erg; motif: NACCGGAARTN; match class: 1	TF:M11396_1	1.9066658652521388e-8	7.719725408470334	5009	255	111	19917	RPL41,APOC2,SUPT4H1,MAGED4,DMAC1,GOLGA4,INO80D,GOLGA3,ALMS1,KCMF1,RPS14,CCDC88B,SLC38A10,FKBP2,GTF2A2,ZNF638,SREK1,N4BP2,ZBTB37,LYPLA1,ATP5MG,NUMA1,SNRPG,COX7C,UPF1,NIPBL,ANKRD12,KRI1,RSF1,FKBP1A,GAK,KIAA1109,PPIA,RPL23A,CCDC137,COMMD4,NDUFC2,MTX3,PNISR,NASP,PEX2,ELOC,SREK1IP1,RNF139,NFKBIL1,SURF6,PSMC5,RPL15,AXIN1,SAMD8,HTATSF1,ARFRP1,RER1,CDK11B,ZNF707,DAZAP1,CCDC9,RPL10A,INTS1,C3ORF38,TBL3,PSE…
TF	Factor: Fli-1; motif: NACCGGAARTN; match class: 1	TF:M11404_1	2.0565675362597724e-8	7.68685702398931	3194	255	82	19917	APOC2,SUPT4H1,MAGED4,INO80D,GOLGA3,ALMS1,KCMF1,RPS14,SLC38A10,FKBP2,GTF2A2,SREK1,N4BP2,ZBTB37,LYPLA1,ATP5MG,SNRPG,COX7C,ANKRD12,FKBP1A,GAK,PPIA,RPL23A,CCDC137,COMMD4,MTX3,PNISR,NASP,PEX2,SREK1IP1,SURF6,PSMC5,RPL15,AXIN1,POLR2J3,SAMD8,HTATSF1,ARFRP1,RER1,CDK11B,ZNF707,GOLGB1,DAZAP1,CCDC9,INTS1,PSENEN,BMS1,PAXX,RPS3A,ZGPAT,WDR46,TIMM13,SUGP2,DNAJC5,SSR3,ZNF646,UBXN1,EWSR1,GLB1,ASB1,PPAN,DDX54,HYPK,…
TF	Factor: ERG; motif: ACCGGAARTN; match class: 1	TF:M03975_1	2.0565675362597724e-8	7.68685702398931	4048	255	96	19917	APOC2,SUPT4H1,MAGED4,DMAC1,INO80D,GOLGA3,ALMS1,HDGFL2,KCMF1,RPS14,SLC38A10,FKBP2,GTF2A2,SREK1,N4BP2,ZBTB37,LYPLA1,ATP5MG,SNRPG,COX7C,ANKRD12,FKBP1A,GAK,KIAA1109,GCC2,PPIA,RPL23A,CCDC137,COMMD4,MTX3,PNISR,NASP,PEX2,ELOC,ZNF221,SREK1IP1,RNF139,SURF6,PSMC5,RPL15,AXIN1,POLR2J3,SAMD8,ARFRP1,RER1,CDK11B,ZNF707,GOLGB1,DAZAP1,CCDC9,RPL10A,INTS1,TBL3,PSENEN,EIF3A,BMS1,PAXX,TAF10,RPS3A,ZGPAT,WDR46,TIMM13,R…
TF	Factor: Erg; motif: NACCGGAARTN	TF:M11396	3.0317251021972746e-8	7.5183101803524055	10863	255	188	19917	RPL41,LSM8,APOC2,SUPT4H1,MAGED4,SELENOT,BCKDHA,DMAC1,GOLGA4,INO80D,CNIH1,GOLGA3,ALMS1,SMG1,HDGFL2,KCMF1,POTEE,RPS14,CCDC88B,SLC38A10,FKBP2,GTF2A2,ZNF627,ZNF638,SREK1,SCYL1,N4BP2,ZBTB37,LYPLA1,ATP5MG,NUMA1,NDUFS7,SNRPG,COX7C,UPF1,RBM6,NONO,NIPBL,ANKRD12,KRI1,MMADHC,MVD,RSF1,FKBP1A,CNIH4,GAK,KIAA1109,RIF1,GCC2,PPIA,RPL23A,POLD1,TIMM8B,CCDC137,COMMD4,NDUFC2,MTX3,PNISR,PTRHD1,TTBK2,METTL16,NASP,PEX2,…
TF	Factor: ER81; motif: RCCGGAARYN; match class: 1	TF:M02065_1	3.381957860155574e-8	7.470831808097213	6798	255	136	19917	RPL41,LSM8,APOC2,SUPT4H1,MAGED4,DMAC1,GOLGA4,INO80D,GOLGA3,ALMS1,KCMF1,RPS14,SLC38A10,FKBP2,GTF2A2,ZNF638,ZNF207,SREK1,N4BP2,ZBTB37,LYPLA1,ATP5MG,NUMA1,SNRPG,COX7C,UPF1,RBM6,NONO,NIPBL,KRI1,KIF7,MMADHC,RSF1,FKBP1A,GAK,KIAA1109,GCC2,OLA1,PPIA,RPL23A,POLD1,TIMM8B,CCDC137,COMMD4,NDUFC2,MTX3,PNISR,TTBK2,NASP,PEX2,MBD3,ELOC,SREK1IP1,RNF139,NFKBIL1,CNOT7,SURF6,RAN,PSMC5,RPL15,AXIN1,SAMD8,ARFRP1,RER1,EI…
TF	Factor: ER81; motif: RCCGGAARYN	TF:M02065	3.5538242492853e-8	7.449304053585558	12666	255	208	19917	RPL41,LSM8,APOC2,SUPT4H1,MAGED4,SELENOT,BCKDHA,DMAC1,GOLGA4,INO80D,CNIH1,GOLGA3,ALMS1,HDGFL2,KCMF1,POTEE,RPS14,CCDC88B,KIAA0232,SLC38A10,FKBP2,GTF2A2,ZNF627,ZNF638,ZNF207,SREK1,SCYL1,N4BP2,ZBTB37,CEP250,LYPLA1,ATP5MG,NUMA1,NDUFS7,SNRPG,COX7C,UPF1,RBM6,NONO,NIPBL,TCEAL3,ANKRD12,KRI1,KIF7,MMADHC,UBTF,MVD,RSF1,FKBP1A,GAK,KIAA1109,RIF1,CRTAP,GCC2,OLA1,TCEAL4,CTNNBL1,PPIA,RPL23A,POLD1,TIMM8B,CCDC137,C…
TF	Factor: E2F; motif: GGCGSG; match class: 1	TF:M00803_1	3.5538242492853e-8	7.449304053585558	10294	255	181	19917	RPL41,LSM8,MAGED4,SELENOT,BCKDHA,INO80D,SAFB2,CNIH1,GOLGA3,SMG1,HDGFL2,SAFB,KCMF1,RPS14,KIAA0232,SLC38A10,FKBP2,GTF2A2,ZNF627,ZNF638,ZNF207,SREK1,SCYL1,N4BP2,ZBTB37,LYPLA1,ANKRD36C,ATP5MG,NUMA1,SNRPG,UPF1,ZNF652,RBM6,ZNF37A,RANBP2,ANKRD12,KIF7,KIF3A,UBTF,MVD,FKBP1A,CNIH4,GAK,RIF1,CRTAP,LUC7L,GCC2,OLA1,PPIA,RPL23A,POLD1,CCDC137,NDUFC2,YWHAQ,MTX3,PNISR,PTRHD1,METTL16,PEX2,FAM50A,MBD3,ZNF221,RNF139,…
TF	Factor: Elk-1; motif: RCCGGAAGTGN; match class: 1	TF:M09904_1	3.589471541602561e-8	7.444969485532989	2769	255	74	19917	APOC2,SUPT4H1,DMAC1,GOLGA4,GOLGA3,ALMS1,KCMF1,RPS14,SLC38A10,FKBP2,GTF2A2,SREK1,N4BP2,ZBTB37,ATP5MG,SNRPG,NIPBL,FKBP1A,GAK,RPL23A,CCDC137,PNISR,NASP,PEX2,ELOC,NFKBIL1,PSMC5,AXIN1,POLR2J3,SAMD8,ARFRP1,RER1,CDK11B,ZNF707,CCDC9,INTS1,C3ORF38,ARHGAP4,PSENEN,BMS1,PAXX,RPS3A,ZGPAT,WDR46,TIMM13,RAB8A,SUGP2,DNAJC5,SSR3,ZNF646,SLC25A5,EWSR1,DHX38,ASB1,PPAN,DDX54,HYPK,PTPN11,ATAD2B,ZNF721,STK19,C6ORF47,FUN…
TF	Factor: E2F-4; motif: NTTTCSCGCC	TF:M07380	3.6071514381106504e-8	7.44283562442541	13143	255	213	19917	RPL41,LSM8,APOC2,SUPT4H1,MAGED4,SELENOT,BCKDHA,DMAC1,INO80D,SAFB2,CNIH1,GOLGA3,ALMS1,SMG1,HDGFL2,SAFB,KCMF1,POTEE,RPS14,KIAA0232,SLC38A10,FKBP2,GTF2A2,ZNF627,ZNF638,ZNF207,SREK1,SCYL1,N4BP2,ZBTB37,CEP250,LYPLA1,ANKRD36C,ATP5MG,NUMA1,NDUFS7,SNRPG,COX7C,UPF1,RBM6,ZNF37A,NONO,NIPBL,RANBP2,ANKRD12,KRI1,KIF7,KIF3A,MMADHC,UBTF,MVD,RSF1,FKBP1A,GAK,KIAA1109,RIF1,CRTAP,LUC7L,GCC2,OLA1,CTNNBL1,PPIA,RPL23A,…
TF	Factor: p300; motif: ACNTCCG; match class: 1	TF:M04826_1	3.8412423698861414e-8	7.415528289402571	15413	255	235	19917	RPL41,LSM8,APOC2,SUPT4H1,MAGED4,SELENOT,BCKDHA,DMAC1,GOLGA4,INO80D,SAFB2,CNIH1,GOLGA3,ALMS1,SMG1,HDGFL2,SAFB,KCMF1,POTEE,RPS14,CCDC88B,KIAA0232,SLC38A10,FKBP2,GTF2A2,ZNF627,ZNF638,ZNF207,SREK1,N4BP2,ZBTB37,CEP250,LYPLA1,ANKRD36C,ATP5MG,NUMA1,NDUFS7,SNRPG,COX7C,UPF1,ZNF652,RBM6,ZNF37A,NONO,NIPBL,RANBP2,ANKRD12,KRI1,KIF7,KIF3A,CSNK2A3,MMADHC,UBTF,MVD,RSF1,FKBP1A,CNIH4,GAK,RIF1,CRTAP,LUC7L,GCC2,OLA1…
TF	Factor: Elf-1; motif: NAMCCGGAAGTN	TF:M11447	4.075951248316636e-8	7.389771019148852	7786	255	149	19917	RPL41,LSM8,APOC2,SUPT4H1,MAGED4,BCKDHA,DMAC1,GOLGA4,GOLGA3,ALMS1,HDGFL2,KCMF1,RPS14,CCDC88B,SLC38A10,FKBP2,GTF2A2,ZNF638,ZNF207,SREK1,SCYL1,N4BP2,ZBTB37,LYPLA1,ATP5MG,NUMA1,SNRPG,COX7C,UPF1,NIPBL,TCEAL3,MMADHC,FKBP1A,GAK,KIAA1109,RIF1,GCC2,OLA1,CTNNBL1,RPL23A,POLD1,TIMM8B,CCDC137,MTX3,PNISR,PTRHD1,NASP,PEX2,ELOC,ZNF221,RNF139,CEP131,PPP2CA,ANKS3,SURF6,PSMC5,RPL15,AXIN1,GRIPAP1,UBXN7,POLR2J3,SAMD8…
TF	Factor: Erg; motif: NACCGGAARYN; match class: 1	TF:M11392_1	4.170759348440851e-8	7.379784868092155	3253	255	82	19917	APOC2,SUPT4H1,MAGED4,DMAC1,INO80D,GOLGA3,ALMS1,KCMF1,RPS14,SLC38A10,FKBP2,GTF2A2,ZNF638,SREK1,N4BP2,ZBTB37,LYPLA1,ATP5MG,SNRPG,COX7C,UPF1,FKBP1A,GAK,KIAA1109,PPIA,RPL23A,CCDC137,COMMD4,MTX3,PNISR,NASP,PEX2,SREK1IP1,RNF139,SURF6,PSMC5,RPL15,AXIN1,SAMD8,ARFRP1,RER1,CDK11B,ZNF707,DAZAP1,CCDC9,RPL10A,INTS1,PSENEN,BMS1,PAXX,ZGPAT,WDR46,TIMM13,SUGP2,DNAJC5,SSR3,ZNF646,EWSR1,RBM15,ZNF33A,GLB1,ASB1,PPAN,…
TF	Factor: E2F-1; motif: NTTTCGCGCS	TF:M00940	4.423158773886455e-8	7.354267470898281	7873	255	150	19917	RPL41,MAGED4,SELENOT,INO80D,CNIH1,GOLGA3,SMG1,KCMF1,POTEE,RPS14,SLC38A10,FKBP2,ZNF627,ZNF638,ZNF207,SREK1,SCYL1,N4BP2,CEP250,LYPLA1,ANKRD36C,ATP5MG,NUMA1,NDUFS7,COX7C,UPF1,ZNF37A,NIPBL,RANBP2,KIF7,KIF3A,UBTF,RSF1,GAK,RIF1,LUC7L,GCC2,OLA1,PPIA,RPL23A,POLD1,TIMM8B,CCDC137,COMMD4,YWHAQ,MTX3,METTL16,NASP,PEX2,MBD3,SREK1IP1,CEP131,NFKBIL1,CNOT7,SURF6,RAN,EDF1,RRBP1,PURA,RPL15,GRIPAP1,POLR2J3,HTATSF1,A…
TF	Factor: Elf-1; motif: ACTTCCGGG	TF:M04714	4.473442528448156e-8	7.349358137786012	7876	255	150	19917	RPL41,LSM8,APOC2,SUPT4H1,MAGED4,BCKDHA,DMAC1,GOLGA4,CNIH1,GOLGA3,ALMS1,HDGFL2,KCMF1,RPS14,CCDC88B,SLC38A10,FKBP2,GTF2A2,ZNF638,SREK1,SCYL1,N4BP2,ZBTB37,LYPLA1,ATP5MG,NUMA1,SNRPG,COX7C,UPF1,RBM6,NIPBL,TCEAL3,KIF7,MMADHC,FKBP1A,GAK,KIAA1109,RIF1,GCC2,RPL23A,POLD1,TIMM8B,CCDC137,NDUFC2,MTX3,PNISR,PTRHD1,NASP,PEX2,ELOC,ZNF221,RNF139,CEP131,NFKBIL1,PPP2CA,SURF6,PSMC5,RPL15,AXIN1,UBXN7,POLR2J3,SAMD8,AR…
TF	Factor: E2F; motif: GGCGSG	TF:M00803	5.306318255255746e-8	7.275206706039246	13289	255	214	19917	RPL41,LSM8,SUPT4H1,MAGED4,SELENOT,BCKDHA,DMAC1,INO80D,SAFB2,CNIH1,GOLGA3,SMG1,HDGFL2,SAFB,KCMF1,POTEE,RPS14,KIAA0232,SLC38A10,FKBP2,GTF2A2,ZNF627,ZNF638,ZNF207,SREK1,SCYL1,N4BP2,ZBTB37,CEP250,LYPLA1,ANKRD36C,ATP5MG,NUMA1,SNRPG,COX7C,UPF1,ZNF652,RBM6,ZNF37A,NONO,NIPBL,RANBP2,TCEAL3,ANKRD12,KRI1,KIF7,KIF3A,UBTF,MVD,FKBP1A,CNIH4,GAK,RIF1,CRTAP,LUC7L,GCC2,OLA1,CTNNBL1,PPIA,RPL23A,POLD1,CCDC137,COMMD4…
TF	Factor: E2F-2; motif: GCGCGCGCNCS	TF:M11529	5.5499649246058927e-8	7.255709761579711	16407	255	243	19917	UQCRHL,LSM8,SUPT4H1,MAGED4,SELENOT,BCKDHA,DMAC1,GOLGA4,INO80D,SAFB2,CNIH1,GOLGA3,ALMS1,SMG1,HDGFL2,SAFB,KCMF1,POTEE,RPS14,CCDC88B,KIAA0232,SLC38A10,FKBP2,GTF2A2,ZNF627,ZNF638,ZNF207,SREK1,SCYL1,N4BP2,ZBTB37,CEP250,LYPLA1,ANKRD36C,ATP5MG,NUMA1,NDUFS7,SNRPG,COX7C,UPF1,ZNF652,RBM6,ZNF37A,NONO,NIPBL,RANBP2,TCEAL3,ANKRD12,KRI1,KIF7,KIF3A,CSNK2A3,MMADHC,UBTF,MVD,RSF1,FKBP1A,CNIH4,GAK,KIAA1109,RIF1,CRTA…
TF	Factor: NRF-1; motif: YGCGCATGCGCN; match class: 1	TF:M04059_1	5.588065838046384e-8	7.252738485712508	1038	255	40	19917	LSM8,MAGED4,SAFB2,SAFB,ZNF638,CEP250,ATP5MG,NDUFS7,ZNF652,KRI1,MMADHC,FKBP1A,POLD1,TIMM8B,PNISR,PTRHD1,TTBK2,RNF139,RAN,UBXN7,POLR2J3,SAMD8,RPL10A,PSENEN,UBN2,TIMM13,KIF5B,SMG6,SUGP2,DNAJC5,OSER1,SNRNP70,AKAP13,EWSR1,ZNF33A,ZBTB17,NXF1,FUNDC2,CKLF,TBCA
TF	Factor: GABP-alpha; motif: NNNRCCGGAAGTGN	TF:M09935	5.633546134937797e-8	7.249218144753854	4467	255	101	19917	RPL41,APOC2,SUPT4H1,BCKDHA,DMAC1,GOLGA3,HDGFL2,KCMF1,RPS14,SLC38A10,FKBP2,GTF2A2,ZNF638,SREK1,N4BP2,ZBTB37,ATP5MG,NUMA1,UPF1,NIPBL,MMADHC,FKBP1A,GAK,RIF1,GCC2,RPL23A,POLD1,TIMM8B,CCDC137,MTX3,PNISR,PTRHD1,NASP,PEX2,ELOC,ZNF221,CEP131,NFKBIL1,PPP2CA,SURF6,PSMC5,RPL15,AXIN1,ARFRP1,MOB1B,RER1,EIF3CL,CDK11B,ZNF707,DAPK3,CCDC9,MINDY2,INTS1,C3ORF38,ARHGAP4,TBL3,PSENEN,UBN2,BMS1,PAXX,TAF10,RPS3A,ZGPAT,W…
TF	Factor: Erg; motif: ACCGGAAGTN	TF:M02062	6.030508025445081e-8	7.219646100238974	8143	255	153	19917	RPL41,LSM8,APOC2,SUPT4H1,MAGED4,DMAC1,GOLGA4,INO80D,CNIH1,GOLGA3,ALMS1,HDGFL2,KCMF1,RPS14,CCDC88B,SLC38A10,FKBP2,GTF2A2,ZNF638,SREK1,SCYL1,N4BP2,ZBTB37,LYPLA1,ATP5MG,NUMA1,NDUFS7,SNRPG,COX7C,UPF1,RBM6,NONO,NIPBL,MMADHC,MVD,FKBP1A,GAK,KIAA1109,RIF1,GCC2,PPIA,RPL23A,POLD1,TIMM8B,CCDC137,COMMD4,MTX3,PNISR,NASP,PEX2,ELOC,ZNF221,SREK1IP1,RNF139,CEP131,NFKBIL1,PPP2CA,SURF6,PSMC5,RPL15,AXIN1,GRIPAP1,UBX…
TF	Factor: PEA3; motif: RCCGGAAGYN; match class: 1	TF:M02066_1	6.030508025445081e-8	7.219646100238974	2306	255	65	19917	SUPT4H1,DMAC1,GOLGA3,RPS14,SLC38A10,FKBP2,GTF2A2,SREK1,N4BP2,ZBTB37,ATP5MG,SNRPG,COX7C,NIPBL,FKBP1A,GAK,RPL23A,CCDC137,MTX3,PNISR,NASP,PEX2,ELOC,NFKBIL1,SURF6,PSMC5,RPL15,AXIN1,ARFRP1,RER1,ZNF707,INTS1,C3ORF38,TBL3,PSENEN,BMS1,PAXX,TAF10,RPS3A,ZGPAT,WDR46,TIMM13,HNRNPLL,SUGP2,DNAJC5,SSR3,ZNF646,EWSR1,ASB1,PPAN,PTPN11,ZNF721,STK19,C6ORF47,CYTH2,FUNDC2,DAZ1,DMAP1,FCHSD2,SLX1A,ANTKMT,DPP8,SETD2,CCZ1…
TF	Factor: nerf; motif: NNNCCGGAAGTGN	TF:M09901	6.202638312715305e-8	7.2074235426092725	5408	255	115	19917	RPL41,APOC2,SUPT4H1,BCKDHA,DMAC1,GOLGA4,GOLGA3,ALMS1,KCMF1,RPS14,CCDC88B,SLC38A10,FKBP2,GTF2A2,ZNF638,SREK1,N4BP2,ZBTB37,NUMA1,SNRPG,COX7C,UPF1,NIPBL,MMADHC,FKBP1A,GAK,RIF1,GCC2,RPL23A,POLD1,TIMM8B,CCDC137,MTX3,PNISR,PTRHD1,NASP,PEX2,ZNF221,CEP131,SURF6,PSMC5,RPL15,AXIN1,UBXN7,POLR2J3,SAMD8,ARFRP1,MOB1B,RER1,EIF3CL,CDK11B,ZNF707,DAPK3,CCDC9,MINDY2,INTS1,C3ORF38,ARHGAP4,TBL3,PSENEN,UBN2,BMS1,PAXX,…
TF	Factor: E2F-2; motif: NWTTTGGCGCCAWWNN	TF:M11530	6.320771764400497e-8	7.199229891249677	14722	255	228	19917	RPL41,UQCRHL,LSM8,MAGED4,SELENOT,BCKDHA,GOLGA4,INO80D,SAFB2,CNIH1,GOLGA3,ALMS1,SMG1,HDGFL2,SAFB,KCMF1,POTEE,RPS14,CCDC88B,KIAA0232,SLC38A10,FKBP2,GTF2A2,ZNF627,ZNF638,ZNF207,SREK1,SCYL1,N4BP2,ZBTB37,CEP250,LYPLA1,ANKRD36C,ATP5MG,NUMA1,NDUFS7,SNRPG,COX7C,UPF1,ZNF652,RBM6,ZNF37A,NIPBL,RANBP2,TCEAL3,ANKRD12,KRI1,KIF7,KIF3A,UBTF,MVD,RSF1,FKBP1A,CNIH4,GAK,KIAA1109,RIF1,CRTAP,LUC7L,GCC2,OLA1,PPIA,RPL23…
TF	Factor: Egr-1; motif: GCGCATGCG	TF:M04869	6.320771764400497e-8	7.199229891249677	11319	255	192	19917	UQCRHL,LSM8,SUPT4H1,MAGED4,SELENOT,BCKDHA,DMAC1,GOLGA4,INO80D,SAFB2,CNIH1,GOLGA3,ALMS1,SMG1,SAFB,KCMF1,POTEE,KIAA0232,SLC38A10,FKBP2,GTF2A2,ZNF627,ZNF638,ZNF207,SREK1,N4BP2,ZBTB37,CEP250,LYPLA1,ANKRD36C,ATP5MG,NUMA1,NDUFS7,UPF1,ZNF652,RBM6,ZNF37A,NIPBL,RANBP2,TCEAL3,ANKRD12,KRI1,KIF7,KIF3A,MMADHC,UBTF,MVD,FKBP1A,CNIH4,GAK,KIAA1109,RIF1,LUC7L,PPIA,POLD1,TIMM8B,CCDC137,NDUFC2,MTX3,PNISR,PTRHD1,TTBK…
TF	Factor: c-Ets-2; motif: NCCGGAAGTG; match class: 1	TF:M08759_1	6.716166116873679e-8	7.172878570611805	2943	255	76	19917	APOC2,SUPT4H1,DMAC1,GOLGA4,GOLGA3,KCMF1,RPS14,CCDC88B,SLC38A10,FKBP2,GTF2A2,SREK1,N4BP2,ZBTB37,ATP5MG,SNRPG,COX7C,NIPBL,FKBP1A,GAK,RPL23A,CCDC137,MTX3,PNISR,NASP,PEX2,ELOC,NFKBIL1,AXIN1,POLR2J3,SAMD8,ARFRP1,RER1,CDK11B,ZNF707,CCDC9,INTS1,C3ORF38,ARHGAP4,PSENEN,BMS1,PAXX,RPS3A,ZGPAT,WDR46,TIMM13,UBE2D2,SUGP2,DNAJC5,SSR3,ZNF646,CANX,EWSR1,DHX38,ASB1,PPAN,DDX54,HYPK,PTPN11,ATAD2B,ZNF721,STK19,C6ORF4…
TF	Factor: GABPalpha_GABPbeta; motif: CTTCCKGY	TF:M03791	6.842550617441062e-8	7.164781981233289	3004	255	77	19917	SUPT4H1,DMAC1,GOLGA3,ALMS1,RPS14,FKBP2,GTF2A2,SREK1,SCYL1,N4BP2,ZBTB37,ATP5MG,SNRPG,UPF1,NIPBL,MMADHC,FKBP1A,GAK,RIF1,RPL23A,TIMM8B,CCDC137,NASP,PEX2,ZNF221,CEP131,SURF6,AXIN1,UBXN7,RER1,ZNF707,DAPK3,CCDC9,MINDY2,EIF2S3B,INTS1,C3ORF38,ARHGAP4,PSENEN,BMS1,PAXX,RPS3A,WDR46,TIMM13,RAB8A,HNRNPLL,SUGP2,ZNF646,SLC25A5,EWSR1,RBM15,DHX38,ASB1,PPAN,CMC4,HYPK,ZBTB17,ATAD2B,ZNF721,STK19,TMEM241,PAF1,TSR3,CY…
TF	Factor: E2F-4:DP-1; motif: TTTSGCGC	TF:M00738	7.521619656261187e-8	7.123688631211846	9912	255	175	19917	RPL41,LSM8,APOC2,SUPT4H1,MAGED4,SELENOT,BCKDHA,DMAC1,GOLGA4,INO80D,GOLGA3,SMG1,HDGFL2,POTEE,RPS14,CCDC88B,SLC38A10,ZNF627,ZNF638,ZNF207,SREK1,N4BP2,CEP250,LYPLA1,ANKRD36C,ATP5MG,NUMA1,NDUFS7,COX7C,UPF1,ZNF652,ZNF37A,NONO,NIPBL,RANBP2,KRI1,KIF7,KIF3A,CSNK2A3,MMADHC,CNIH4,RIF1,CRTAP,LUC7L,OLA1,CTNNBL1,PPIA,RPL23A,POLD1,TIMM8B,CCDC137,COMMD4,NDUFC2,YWHAQ,MTX3,PNISR,PTRHD1,TTBK2,METTL16,NASP,PEX2,MBD…
TF	Factor: pax-6; motif: NYACGCNYSANYGMNCN; match class: 1	TF:M11882_1	7.536666328203707e-8	7.1228207118779645	11519	255	194	19917	RPL41,LSM8,APOC2,BCKDHA,DMAC1,GOLGA4,SAFB2,CNIH1,GOLGA3,ALMS1,SMG1,HDGFL2,SAFB,KCMF1,POTEE,RPS14,CCDC88B,KIAA0232,SLC38A10,FKBP2,GTF2A2,ZNF627,ZNF638,ZNF207,SREK1,SCYL1,N4BP2,CEP250,LYPLA1,ANKRD36C,ATP5MG,NUMA1,NDUFS7,SNRPG,COX7C,UPF1,ZNF652,ZNF37A,NONO,NIPBL,RANBP2,ANKRD12,KIF7,KIF3A,MMADHC,UBTF,MVD,FKBP1A,CNIH4,RIF1,CRTAP,LUC7L,OLA1,CTNNBL1,PPIA,RPL23A,POLD1,CCDC137,COMMD4,NDUFC2,YWHAQ,PTRHD1,M…
TF	Factor: E2F-1:Elk-1; motif: SGCGCSNNAMCGGAAGT; match class: 1	TF:M08205_1	8.119118663304728e-8	7.090491111206748	10502	255	182	19917	LSM8,SUPT4H1,MAGED4,SELENOT,BCKDHA,DMAC1,GOLGA4,INO80D,SAFB2,CNIH1,GOLGA3,ALMS1,HDGFL2,SAFB,KCMF1,CCDC88B,KIAA0232,SLC38A10,FKBP2,GTF2A2,ZNF638,SREK1,SCYL1,N4BP2,ZBTB37,CEP250,LYPLA1,ANKRD36C,NUMA1,NDUFS7,SNRPG,COX7C,UPF1,ZNF652,RBM6,ZNF37A,NONO,NIPBL,TCEAL3,ANKRD12,KRI1,KIF3A,UBTF,MVD,RSF1,FKBP1A,GAK,RIF1,CRTAP,LUC7L,GCC2,OLA1,TCEAL4,PPIA,RPL23A,POLD1,CCDC137,YWHAQ,PNISR,PTRHD1,METTL16,NASP,PEX2…
TF	Factor: ELK1; motif: ACCGGAAGTN	TF:M03970	8.154479869806696e-8	7.088603735037784	4838	255	106	19917	RPL41,LSM8,APOC2,SUPT4H1,DMAC1,GOLGA3,HDGFL2,RPS14,SLC38A10,FKBP2,GTF2A2,SREK1,N4BP2,ZBTB37,LYPLA1,ATP5MG,NUMA1,SNRPG,COX7C,UPF1,RBM6,NIPBL,MMADHC,FKBP1A,GAK,RIF1,GCC2,RPL23A,POLD1,TIMM8B,CCDC137,MTX3,PNISR,NASP,CHD2,PEX2,ELOC,ZNF221,CEP131,NFKBIL1,SURF6,PSMC5,AXIN1,UBXN7,POLR2J3,SAMD8,ARFRP1,RER1,EIF3CL,CDK11B,ZNF707,GOLGB1,DAPK3,CCDC9,MINDY2,INTS1,C3ORF38,PSENEN,PAXX,ZGPAT,WDR46,TIMM13,RAB8A,HN…
TF	Factor: Elf-1; motif: NAMCCGGAAGTN; match class: 1	TF:M11447_1	8.442245115055536e-8	7.073542042542822	2616	255	70	19917	APOC2,SUPT4H1,DMAC1,GOLGA3,ALMS1,KCMF1,RPS14,SLC38A10,FKBP2,GTF2A2,SREK1,N4BP2,ZBTB37,LYPLA1,ATP5MG,SNRPG,NIPBL,FKBP1A,GAK,GCC2,RPL23A,CCDC137,PNISR,NASP,PEX2,ELOC,PSMC5,AXIN1,SAMD8,ARFRP1,RER1,CDK11B,ZNF707,DAZAP1,INTS1,C3ORF38,PSENEN,UBN2,BMS1,PAXX,RPS3A,ZGPAT,WDR46,TIMM13,CFAP410,SUGP2,DNAJC5,SSR3,ZNF646,EWSR1,DHX38,ASB1,PPAN,DDX54,HYPK,PTPN11,ATAD2B,ZNF721,STK19,THRAP3,FUNDC2,DMAP1,SLX1A,ANTK…
TF	Factor: FLI1; motif: ACCGGAARTN; match class: 1	TF:M03988_1	9.028762136734048e-8	7.044371788339534	2969	255	76	19917	SUPT4H1,MAGED4,INO80D,GOLGA3,KCMF1,RPS14,SLC38A10,FKBP2,GTF2A2,SREK1,N4BP2,ZBTB37,LYPLA1,ATP5MG,SNRPG,COX7C,ANKRD12,FKBP1A,GAK,PPIA,RPL23A,CCDC137,COMMD4,MTX3,PNISR,NASP,PEX2,SREK1IP1,SURF6,PSMC5,RPL15,AXIN1,POLR2J3,ARFRP1,RER1,CDK11B,ZNF707,GOLGB1,DAZAP1,CCDC9,INTS1,PSENEN,BMS1,PAXX,RPS3A,ZGPAT,WDR46,TIMM13,SUGP2,DNAJC5,SSR3,ZNF646,UBXN1,EWSR1,GLB1,ASB1,PPAN,HYPK,ENGASE,ZBTB17,PTPN11,ATAD2B,STK1…
TF	Factor: ETV5; motif: NCCGGAWGYN	TF:M03983	1.241726144722006e-7	6.905974174650728	3169	255	79	19917	RPL41,APOC2,SUPT4H1,DMAC1,GOLGA3,RPS14,SLC38A10,FKBP2,GTF2A2,SREK1,N4BP2,ZBTB37,ATP5MG,SNRPG,NIPBL,MMADHC,FKBP1A,GAK,RIF1,GCC2,RPL23A,POLD1,TIMM8B,CCDC137,MTX3,PNISR,NASP,PEX2,ELOC,ZNF221,CEP131,NFKBIL1,SURF6,PSMC5,AXIN1,UBXN7,ARFRP1,RER1,EIF3CL,ZNF707,DAPK3,CCDC9,MINDY2,INTS1,C3ORF38,PSENEN,PAXX,ZGPAT,WDR46,TIMM13,RAB8A,HNRNPLL,SSR3,ZNF646,UBXN1,CANX,EWSR1,RBM15,DHX38,ASB1,PPAN,CMC4,HYPK,ZBTB17,…
TF	Factor: Fli-1; motif: NACCGGAARTN; match class: 1	TF:M11400_1	1.3312147554703722e-7	6.8757518772133235	4230	255	96	19917	RPL41,APOC2,SUPT4H1,MAGED4,DMAC1,GOLGA4,INO80D,GOLGA3,ALMS1,KCMF1,RPS14,SLC38A10,FKBP2,GTF2A2,ZNF638,SREK1,N4BP2,ZBTB37,LYPLA1,ATP5MG,NUMA1,SNRPG,COX7C,UPF1,ANKRD12,KRI1,FKBP1A,GAK,KIAA1109,PPIA,RPL23A,CCDC137,COMMD4,NDUFC2,MTX3,PNISR,NASP,PEX2,SREK1IP1,RNF139,SURF6,PSMC5,RPL15,AXIN1,SAMD8,HTATSF1,ARFRP1,RER1,CDK11B,ZNF707,DAZAP1,CCDC9,RPL10A,INTS1,PSENEN,EIF3A,BMS1,PAXX,RPS3A,ZGPAT,WDR46,TIMM13,…
TF	Factor: YY2; motif: NCCGCCATNTY	TF:M03925	1.3873860022607377e-7	6.857802691537213	4690	255	103	19917	RPL41,SELENOT,BCKDHA,SAFB2,GOLGA3,HDGFL2,SAFB,ZNF638,CEP250,LYPLA1,ANKRD36C,NDUFS7,COX7C,UPF1,NONO,ANKRD12,KRI1,CSNK2A3,MMADHC,FKBP1A,GAK,RIF1,TCEAL4,TIMM8B,CCDC137,YWHAQ,MTX3,PTRHD1,METTL16,NASP,CHD2,SREK1IP1,RNF139,NFKBIL1,PPP2CA,SURF6,RAN,EDF1,RRBP1,PSMC5,RPL15,UBXN7,HTATSF1,EIF3CL,PELP1,DAZAP1,CCDC9,TELO2,EIF2S3B,INTS1,C3ORF38,ARHGAP4,EIF3A,UBN2,RPS3A,WDR46,BDP1,UBE2D2,HNRNPLL,CFAP410,KIF5B,S…
TF	Factor: ELK-1; motif: ACCGGAAGTN; match class: 1	TF:M02059_1	1.3873860022607377e-7	6.857802691537213	3792	255	89	19917	APOC2,SUPT4H1,MAGED4,DMAC1,GOLGA4,INO80D,GOLGA3,ALMS1,KCMF1,RPS14,SLC38A10,FKBP2,GTF2A2,SREK1,N4BP2,ZBTB37,LYPLA1,ATP5MG,NUMA1,SNRPG,COX7C,NIPBL,FKBP1A,GAK,PPIA,RPL23A,CCDC137,MTX3,PNISR,NASP,PEX2,ELOC,NFKBIL1,SURF6,PSMC5,RPL15,AXIN1,SAMD8,ARFRP1,RER1,CDK11B,ZNF707,DAZAP1,INTS1,C3ORF38,TBL3,PSENEN,BMS1,PAXX,TAF10,RPS3A,ZGPAT,WDR46,TIMM13,HNRNPLL,SUGP2,DNAJC5,SSR3,ZNF646,ATP5F1E,UBXN1,EWSR1,DHX38,…
TF	Factor: c-ets-2; motif: ACCGGAWRTN; match class: 1	TF:M02064_1	1.3926639756739604e-7	6.856153658245606	4626	255	102	19917	SUPT4H1,GOLGA4,INO80D,CNIH1,GOLGA3,HDGFL2,KCMF1,RPS14,FKBP2,GTF2A2,SREK1,N4BP2,ZBTB37,LYPLA1,ATP5MG,SNRPG,COX7C,RBM6,ANKRD12,FKBP1A,GAK,RIF1,GCC2,PPIA,RPL23A,CCDC137,MTX3,PNISR,NASP,PEX2,ELOC,ZNF221,SREK1IP1,CEP131,PPP2CA,CNOT7,SURF6,RAN,EDF1,PSMC5,RPL15,AXIN1,GRIPAP1,HTATSF1,ARFRP1,RER1,CDK11B,ZNF707,GOLGB1,DAPK3,INTS1,ARHGAP4,TBL3,PSENEN,BMS1,PAXX,TAF10,RESF1,RPS3A,ZGPAT,WDR46,TIMM13,RAB8A,UBE2…
TF	Factor: etv3; motif: ACCGGAAGYN	TF:M02068	1.396940964154549e-7	6.854821947131106	3485	255	84	19917	RPL41,APOC2,SUPT4H1,DMAC1,HDGFL2,RPS14,SLC38A10,FKBP2,GTF2A2,SREK1,N4BP2,ZBTB37,ATP5MG,SNRPG,NIPBL,MMADHC,FKBP1A,GAK,RIF1,GCC2,RPL23A,POLD1,TIMM8B,CCDC137,MTX3,PNISR,NASP,PEX2,ELOC,ZNF221,CEP131,SURF6,PSMC5,AXIN1,GRIPAP1,UBXN7,ARFRP1,RER1,EIF3CL,ZNF707,DAPK3,CCDC9,MINDY2,INTS1,C3ORF38,TBL3,PSENEN,PAXX,TAF10,ZGPAT,WDR46,TIMM13,RAB8A,HNRNPLL,KIF5B,SUGP2,SNRNP70,ZNF646,ATP5F1E,UBXN1,EWSR1,RBM15,DHX3…
TF	Factor: Elf-1; motif: NANGCGGAAGTN	TF:M11448	1.5209167243750796e-7	6.817894564470653	7657	255	145	19917	RPL41,APOC2,SUPT4H1,BCKDHA,DMAC1,GOLGA4,GOLGA3,HDGFL2,RPS14,CCDC88B,KIAA0232,SLC38A10,FKBP2,GTF2A2,ZNF207,SREK1,SCYL1,ZBTB37,LYPLA1,ATP5MG,NUMA1,SNRPG,COX7C,UPF1,NIPBL,TCEAL3,KIF7,MMADHC,FKBP1A,GAK,RIF1,CRTAP,GCC2,OLA1,TCEAL4,CTNNBL1,PPIA,RPL23A,POLD1,TIMM8B,CCDC137,COMMD4,YWHAQ,MTX3,PNISR,PTRHD1,NASP,PEX2,MBD3,ELOC,ZNF221,RNF139,CEP131,NFKBIL1,PPP2CA,SURF6,RAN,PSMC5,RPL15,AXIN1,GRIPAP1,POLR2J3,S…
TF	Factor: NRF-1; motif: SYGCGCMTGCGCRNNGSN; match class: 1	TF:M09641_1	1.5209167243750796e-7	6.817894564470653	997	255	38	19917	MAGED4,SELENOT,SAFB2,SAFB,POTEE,LYPLA1,ATP5MG,UPF1,ZNF652,KRI1,GAK,LUC7L,POLD1,TIMM8B,PNISR,PTRHD1,TTBK2,MBD3,RNF139,PPP2CA,RAN,UBXN7,POLR2J3,DAZAP1,RPL10A,UBN2,TIMM13,RAB8A,SUGP2,DNAJC5,SNRNP70,AKAP13,CANX,ZBTB17,SMAD4,RBM12B,CKLF,TBCA
TF	Factor: ERF; motif: ACCGGAARYN	TF:M02061	1.5209167243750796e-7	6.817894564470653	2604	255	69	19917	RPL41,APOC2,SUPT4H1,GOLGA3,HDGFL2,FKBP2,GTF2A2,N4BP2,ATP5MG,SNRPG,COX7C,NIPBL,FKBP1A,GAK,GCC2,RPL23A,POLD1,TIMM8B,CCDC137,NASP,PEX2,ELOC,ZNF221,CEP131,PSMC5,AXIN1,ARFRP1,RER1,ZNF707,DAPK3,CCDC9,MINDY2,INTS1,C3ORF38,TBL3,PSENEN,PAXX,TAF10,ZGPAT,WDR46,TIMM13,HNRNPLL,KIF5B,SUGP2,SSR3,SNRNP70,ZNF646,UBXN1,RBM15,DHX38,ASB1,PPAN,CMC4,HYPK,ZBTB17,STK19,PAF1,TSR3,THRAP3,CYTH2,DMAP1,FAM199X,SLX1A,MAGEF1,A…
TF	Factor: ERG; motif: ACCGGAART; match class: 1	TF:M01752_1	1.5209167243750796e-7	6.817894564470653	3740	255	88	19917	APOC2,SUPT4H1,MAGED4,DMAC1,GOLGA4,INO80D,GOLGA3,ALMS1,HDGFL2,KCMF1,RPS14,SLC38A10,FKBP2,GTF2A2,SREK1,N4BP2,ZBTB37,LYPLA1,ATP5MG,SNRPG,COX7C,NIPBL,FKBP1A,GAK,PPIA,RPL23A,CCDC137,COMMD4,MTX3,PNISR,NASP,PEX2,ELOC,NFKBIL1,SURF6,PSMC5,RPL15,AXIN1,POLR2J3,SAMD8,ARFRP1,RER1,CDK11B,ZNF707,DAZAP1,INTS1,C3ORF38,TBL3,PSENEN,BMS1,PAXX,TAF10,RPS3A,ZGPAT,WDR46,TIMM13,HNRNPLL,SUGP2,DNAJC5,SSR3,ZNF646,UBXN1,EWSR…
TF	Factor: ETS1; motif: ACCGGAARYN; match class: 1	TF:M03977_1	1.610086911446017e-7	6.793150680401274	4710	255	103	19917	RPL41,LSM8,APOC2,SUPT4H1,MAGED4,DMAC1,GOLGA4,INO80D,GOLGA3,ALMS1,KCMF1,RPS14,SLC38A10,FKBP2,GTF2A2,ZNF638,SREK1,N4BP2,ZBTB37,LYPLA1,ATP5MG,NUMA1,SNRPG,COX7C,UPF1,RBM6,ANKRD12,KRI1,FKBP1A,GAK,KIAA1109,GCC2,RPL23A,TIMM8B,CCDC137,COMMD4,NDUFC2,MTX3,PNISR,NASP,PEX2,ELOC,SREK1IP1,RNF139,SURF6,PSMC5,RPL15,AXIN1,SAMD8,HTATSF1,ARFRP1,RER1,CDK11B,ZNF707,DAZAP1,CCDC9,RPL10A,INTS1,C3ORF38,PSENEN,EIF3A,BMS1,…
TF	Factor: Elk-1; motif: NRSCGGAAGNN; match class: 1	TF:M11434_1	1.6252315335743256e-7	6.789084759859984	2959	255	75	19917	APOC2,SUPT4H1,DMAC1,GOLGA3,ALMS1,KCMF1,RPS14,CCDC88B,KIAA0232,SLC38A10,FKBP2,GTF2A2,SREK1,N4BP2,ZBTB37,LYPLA1,ATP5MG,NUMA1,SNRPG,UPF1,NIPBL,FKBP1A,GAK,OLA1,PPIA,RPL23A,CCDC137,PNISR,NASP,PEX2,ELOC,PSMC5,AXIN1,ARFRP1,RER1,CDK11B,ZNF707,CCDC9,INTS1,C3ORF38,TBL3,PSENEN,BMS1,PAXX,TAF10,RPS3A,ZGPAT,WDR46,TIMM13,HNRNPLL,SUGP2,SSR3,ZNF646,SLC25A5,EWSR1,DHX38,PRAME,ASB1,PPAN,DDX54,HYPK,ZNF721,STK19,TSR3,…
TF	Factor: NRF-1; motif: CGCATGCGCR	TF:M00652	1.735965310246347e-7	6.760458957569156	1382	255	46	19917	LSM8,MAGED4,BCKDHA,SAFB2,SAFB,POTEE,ZNF638,LYPLA1,ATP5MG,UPF1,ZNF652,ZNF37A,KRI1,KIF3A,MMADHC,FKBP1A,GAK,PPIA,TIMM8B,PNISR,PTRHD1,TTBK2,METTL16,MBD3,SURF6,RAN,POLR2J3,DAZAP1,RPL10A,UBN2,TIMM13,RAB8A,SMG6,SUGP2,DNAJC5,CEP192,SNRNP70,AKAP13,ZNF33A,ZBTB17,NXF1,SLK,FUNDC2,RBM12B,CKLF,TBCA
TF	Factor: Elk-1; motif: NNNNCCGGAARTNN	TF:M00025	1.741547032489957e-7	6.759064792423062	10355	255	179	19917	RPL41,LSM8,APOC2,SUPT4H1,MAGED4,SELENOT,BCKDHA,DMAC1,GOLGA4,INO80D,CNIH1,GOLGA3,ALMS1,SMG1,HDGFL2,KCMF1,POTEE,RPS14,CCDC88B,SLC38A10,FKBP2,GTF2A2,ZNF627,ZNF638,SREK1,SCYL1,N4BP2,ZBTB37,LYPLA1,ATP5MG,NUMA1,NDUFS7,SNRPG,COX7C,UPF1,RBM6,NONO,NIPBL,ANKRD12,KRI1,MMADHC,RSF1,FKBP1A,GAK,KIAA1109,RIF1,GCC2,OLA1,CTNNBL1,PPIA,RPL23A,POLD1,TIMM8B,CCDC137,COMMD4,NDUFC2,MTX3,PNISR,PTRHD1,METTL16,NASP,PEX2,MBD…
TF	Factor: YY1; motif: NNCGCCATTNN	TF:M03924	1.810677256622706e-7	6.742158953418118	10195	255	177	19917	RPL41,MAGED4,SELENOT,BCKDHA,GOLGA4,SAFB2,CNIH1,GOLGA3,HDGFL2,SAFB,KIAA0232,FKBP2,GTF2A2,ZNF627,ZNF638,ZNF207,SREK1,N4BP2,ZBTB37,CEP250,LYPLA1,ANKRD36C,NUMA1,NDUFS7,SNRPG,COX7C,UPF1,RBM6,NONO,NIPBL,RANBP2,ANKRD12,KRI1,KIF7,CSNK2A3,MMADHC,UBTF,MVD,RSF1,FKBP1A,GAK,RIF1,LUC7L,TCEAL4,PPIA,RPL23A,TIMM8B,CCDC137,YWHAQ,MTX3,PNISR,TTC3,PTRHD1,METTL16,NASP,CHD2,FAM50A,MBD3,ZNF221,SREK1IP1,RNF139,CEP131,NFK…
TF	Factor: Elk-1; motif: NRCCGGAAGTN	TF:M11433	1.9995423766128246e-7	6.699069387362372	7772	255	146	19917	RPL41,LSM8,APOC2,SUPT4H1,DMAC1,GOLGA3,ALMS1,HDGFL2,KCMF1,RPS14,CCDC88B,SLC38A10,FKBP2,GTF2A2,SREK1,SCYL1,N4BP2,ZBTB37,LYPLA1,ATP5MG,NUMA1,SNRPG,COX7C,UPF1,RBM6,ZNF37A,NIPBL,RANBP2,KRI1,MMADHC,MVD,RSF1,FKBP1A,GAK,RIF1,GCC2,RPL23A,POLD1,TIMM8B,CCDC137,COMMD4,MTX3,PNISR,TTBK2,NASP,CHD2,PEX2,MBD3,ELOC,ZNF221,CEP131,NFKBIL1,CNOT7,SURF6,RAN,EDF1,PSMC5,AXIN1,UBXN7,POLR2J3,SAMD8,ARFRP1,RER1,EIF3CL,CDK11B…
TF	Factor: GABP-alpha; motif: CTTCCK	TF:M01660	1.9995423766128246e-7	6.699069387362372	11217	255	189	19917	RPL41,UQCRHL,LSM8,APOC2,SUPT4H1,MAGED4,BCKDHA,DMAC1,GOLGA4,GOLGA3,ALMS1,HDGFL2,KCMF1,RPS14,CCDC88B,KIAA0232,SLC38A10,FKBP2,GTF2A2,ZNF638,ZNF207,SREK1,SCYL1,N4BP2,ZBTB37,CEP250,LYPLA1,ATP5MG,NUMA1,SNRPG,COX7C,UPF1,NONO,NIPBL,TCEAL3,KRI1,KIF7,CSNK2A3,MMADHC,UBTF,FKBP1A,CNIH4,GAK,KIAA1109,RIF1,CRTAP,LUC7L,GCC2,OLA1,TCEAL4,CTNNBL1,PPIA,RPL23A,POLD1,TIMM8B,CCDC137,COMMD4,YWHAQ,MTX3,PNISR,PTRHD1,TTBK2,…
TF	Factor: Elf-1; motif: NANCCGGAAGTN	TF:M11451	1.9995423766128246e-7	6.699069387362372	6956	255	135	19917	RPL41,LSM8,APOC2,SUPT4H1,MAGED4,BCKDHA,DMAC1,GOLGA4,GOLGA3,ALMS1,KCMF1,RPS14,CCDC88B,SLC38A10,FKBP2,GTF2A2,ZNF638,ZNF207,SREK1,N4BP2,ZBTB37,LYPLA1,ATP5MG,NUMA1,SNRPG,COX7C,UPF1,NIPBL,MMADHC,FKBP1A,GAK,KIAA1109,RIF1,GCC2,OLA1,CTNNBL1,RPL23A,POLD1,TIMM8B,CCDC137,MTX3,PNISR,PTRHD1,NASP,PEX2,ELOC,ZNF221,CEP131,PPP2CA,SURF6,PSMC5,RPL15,AXIN1,GRIPAP1,UBXN7,POLR2J3,SAMD8,ARFRP1,MOB1B,RER1,EIF3CL,CDK11B,…
TF	Factor: E2F-1:Elk-1; motif: SGCGCSNNAMCGGAAGT	TF:M08205	1.9995423766128246e-7	6.699069387362372	14560	255	225	19917	RPL41,LSM8,APOC2,SUPT4H1,MAGED4,SELENOT,BCKDHA,DMAC1,GOLGA4,INO80D,SAFB2,CNIH1,GOLGA3,ALMS1,SMG1,HDGFL2,SAFB,KCMF1,POTEE,RPS14,CCDC88B,KIAA0232,SLC38A10,FKBP2,GTF2A2,ZNF627,ZNF638,SREK1,SCYL1,N4BP2,ZBTB37,CEP250,LYPLA1,ANKRD36C,ATP5MG,NUMA1,NDUFS7,SNRPG,COX7C,UPF1,ZNF652,RBM6,ZNF37A,NONO,NIPBL,RANBP2,TCEAL3,ANKRD12,KRI1,KIF7,KIF3A,MMADHC,UBTF,MVD,RSF1,FKBP1A,GAK,KIAA1109,RIF1,CRTAP,LUC7L,GCC2,OLA…
TF	Factor: c-ets-2; motif: ACCGGAWRTN	TF:M02064	2.0096042191090443e-7	6.696889466152565	11050	255	187	19917	RPL41,LSM8,APOC2,SUPT4H1,MAGED4,DMAC1,GOLGA4,INO80D,CNIH1,GOLGA3,ALMS1,SMG1,HDGFL2,KCMF1,POTEE,RPS14,CCDC88B,SLC38A10,FKBP2,GTF2A2,SREK1,SCYL1,N4BP2,ZBTB37,LYPLA1,ATP5MG,NUMA1,NDUFS7,SNRPG,COX7C,UPF1,RBM6,ZNF37A,NONO,NIPBL,ANKRD12,KRI1,MMADHC,UBTF,MVD,RSF1,FKBP1A,CNIH4,GAK,KIAA1109,RIF1,GCC2,PPIA,RPL23A,POLD1,TIMM8B,CCDC137,COMMD4,NDUFC2,YWHAQ,MTX3,PNISR,TTBK2,NASP,CHD2,PEX2,ELOC,ZNF221,SREK1IP1,…
TF	Factor: PEA3; motif: NACCGGAAGTN	TF:M11428	2.1388334007457887e-7	6.669823042429223	7260	255	139	19917	RPL41,LSM8,APOC2,SUPT4H1,MAGED4,BCKDHA,DMAC1,GOLGA4,CNIH1,GOLGA3,ALMS1,HDGFL2,KCMF1,RPS14,CCDC88B,SLC38A10,FKBP2,GTF2A2,ZNF638,SREK1,SCYL1,N4BP2,ZBTB37,LYPLA1,ATP5MG,NUMA1,SNRPG,COX7C,UPF1,RBM6,NIPBL,MMADHC,FKBP1A,GAK,KIAA1109,RIF1,GCC2,RPL23A,POLD1,TIMM8B,CCDC137,MTX3,PNISR,PTRHD1,NASP,CHD2,PEX2,ELOC,ZNF221,CEP131,NFKBIL1,SURF6,PSMC5,AXIN1,UBXN7,POLR2J3,SAMD8,ARFRP1,MOB1B,RER1,EIF3CL,CDK11B,ZNF7…
TF	Factor: Fli-1; motif: ACCGGAAGYN	TF:M02073	2.2898703689422172e-7	6.64018910265862	5905	255	120	19917	LSM8,SUPT4H1,MAGED4,DMAC1,GOLGA4,INO80D,CNIH1,GOLGA3,ALMS1,KCMF1,RPS14,SLC38A10,FKBP2,GTF2A2,SREK1,SCYL1,N4BP2,ZBTB37,LYPLA1,ATP5MG,NUMA1,NDUFS7,SNRPG,COX7C,UPF1,RBM6,NIPBL,MMADHC,FKBP1A,GAK,RIF1,RPL23A,TIMM8B,CCDC137,COMMD4,MTX3,PNISR,NASP,PEX2,ZNF221,SREK1IP1,CEP131,NFKBIL1,PPP2CA,SURF6,RPL15,AXIN1,UBXN7,SAMD8,ARFRP1,RER1,EIF3CL,CDK11B,ZNF707,GOLGB1,DAPK3,DAZAP1,CCDC9,RPL10A,MINDY2,INTS1,C3ORF3…
TF	Factor: ETV7; motif: NCCGGAANNN; match class: 1	TF:M02071_1	2.493863447170522e-7	6.603127330233545	4495	255	99	19917	RPL41,LSM8,SUPT4H1,MAGED4,DMAC1,INO80D,GOLGA3,ALMS1,SMG1,KCMF1,RPS14,SLC38A10,FKBP2,GTF2A2,ZNF638,SREK1,N4BP2,ZBTB37,LYPLA1,ATP5MG,NUMA1,SNRPG,COX7C,UPF1,RBM6,ANKRD12,KRI1,FKBP1A,GAK,KIAA1109,RPL23A,TIMM8B,CCDC137,COMMD4,NDUFC2,MTX3,PNISR,NASP,PEX2,SREK1IP1,RNF139,CNOT7,SURF6,PSMC5,RPL15,AXIN1,SAMD8,ARFRP1,RER1,CDK11B,ZNF707,GOLGB1,DAZAP1,CCDC9,RPL10A,INTS1,C3ORF38,PSENEN,EIF3A,BMS1,PAXX,RESF1,RP…
TF	Factor: GABPalpha; motif: RCCGGAWRYN	TF:M02074	2.9940736780455767e-7	6.5237375167601925	4642	255	101	19917	SUPT4H1,INO80D,CNIH1,GOLGA3,POTEE,RPS14,SLC38A10,FKBP2,GTF2A2,SREK1,N4BP2,ZBTB37,LYPLA1,ATP5MG,SNRPG,COX7C,UPF1,RBM6,NONO,NIPBL,ANKRD12,MVD,FKBP1A,GAK,PPIA,RPL23A,TIMM8B,COMMD4,MTX3,PNISR,NASP,PEX2,ZNF221,SREK1IP1,RNF139,CEP131,ANKS3,SURF6,RPL15,AXIN1,SAMD8,ARFRP1,RER1,EIF3CL,CDK11B,ZNF707,DAPK3,CCDC9,RPL10A,MINDY2,INTS1,C3ORF38,TBL3,PSENEN,UBN2,BMS1,PAXX,ZGPAT,WDR46,TIMM13,RAB8A,HNRNPLL,DNAJC5,S…
TF	Factor: Churchill; motif: CGGGNN	TF:M00986	3.0146769492960194e-7	6.520759219727818	14305	255	222	19917	SUPT4H1,MAGED4,SELENOT,BCKDHA,DMAC1,GOLGA4,INO80D,SAFB2,CNIH1,GOLGA3,ALMS1,SMG1,HDGFL2,SAFB,KCMF1,POTEE,RPS14,CCDC88B,KIAA0232,SLC38A10,FKBP2,GTF2A2,ZNF627,ZNF638,SREK1,SCYL1,N4BP2,ZBTB37,CEP250,LYPLA1,ANKRD36C,ATP5MG,NUMA1,NDUFS7,COX7C,UPF1,ZNF652,ZNF37A,NONO,NIPBL,RANBP2,TCEAL3,ANKRD12,KRI1,KIF7,KIF3A,CSNK2A3,UBTF,MVD,RSF1,FKBP1A,CNIH4,KIAA1109,RIF1,CRTAP,LUC7L,GCC2,OLA1,PPIA,POLD1,CCDC137,COMM…
TF	Factor: ERG; motif: ACCGGAARTN	TF:M03975	3.031482919516155e-7	6.51834487439612	10098	255	175	19917	RPL41,LSM8,APOC2,SUPT4H1,MAGED4,DMAC1,GOLGA4,INO80D,CNIH1,GOLGA3,ALMS1,HDGFL2,KCMF1,POTEE,RPS14,CCDC88B,SLC38A10,FKBP2,GTF2A2,ZNF638,SREK1,SCYL1,N4BP2,ZBTB37,LYPLA1,ATP5MG,NUMA1,NDUFS7,SNRPG,COX7C,UPF1,RBM6,NONO,NIPBL,ANKRD12,MMADHC,MVD,RSF1,FKBP1A,GAK,KIAA1109,RIF1,GCC2,PPIA,RPL23A,POLD1,TIMM8B,CCDC137,COMMD4,NDUFC2,MTX3,PNISR,TTBK2,NASP,CHD2,PEX2,ELOC,ZNF221,SREK1IP1,RNF139,CEP131,NFKBIL1,ANKS3…
TF	Factor: E2F-3:HES-7; motif: NNNSGCGCSNNNNNCRCGYGNN; match class: 1	TF:M08526_1	3.034599049152869e-7	6.517898682593191	15130	255	230	19917	RPL41,UQCRHL,LSM8,APOC2,SUPT4H1,MAGED4,SELENOT,BCKDHA,DMAC1,GOLGA4,INO80D,SAFB2,CNIH1,GOLGA3,ALMS1,SMG1,HDGFL2,SAFB,KCMF1,POTEE,RPS14,CCDC88B,KIAA0232,SLC38A10,FKBP2,GTF2A2,ZNF627,ZNF638,SREK1,SCYL1,N4BP2,ZBTB37,CEP250,LYPLA1,ANKRD36C,ATP5MG,NUMA1,NDUFS7,SNRPG,UPF1,ZNF652,RBM6,ZNF37A,NONO,NIPBL,RANBP2,ANKRD12,KRI1,KIF7,KIF3A,UBTF,MVD,RSF1,FKBP1A,CNIH4,GAK,KIAA1109,RIF1,CRTAP,LUC7L,GCC2,OLA1,TCEAL…
TF	Factor: PEA3; motif: NACCGGAAGTN; match class: 1	TF:M11428_1	3.9236412277726255e-7	6.4063107107523445	2166	255	60	19917	APOC2,SUPT4H1,GOLGA3,ALMS1,HDGFL2,KCMF1,RPS14,SLC38A10,FKBP2,GTF2A2,SREK1,N4BP2,ZBTB37,LYPLA1,ATP5MG,SNRPG,FKBP1A,GAK,RPL23A,CCDC137,MTX3,PNISR,NASP,PEX2,AXIN1,POLR2J3,SAMD8,ARFRP1,RER1,CDK11B,ZNF707,INTS1,C3ORF38,PSENEN,PAXX,RPS3A,ZGPAT,WDR46,TIMM13,SUGP2,DNAJC5,SSR3,ZNF646,EWSR1,ASB1,PPAN,DDX54,HYPK,ATAD2B,STK19,CYTH2,FUNDC2,DMAP1,SLX1A,ANTKMT,DPP8,SETD2,CCZ1B,CREBZF,RPA3
TF	Factor: E2F-4; motif: SNGGGCGGGAANN; match class: 1	TF:M09894_1	3.9803908341820377e-7	6.400074282500411	14041	255	219	19917	RPL41,LSM8,SUPT4H1,MAGED4,DMAC1,GOLGA4,INO80D,SAFB2,GOLGA3,ALMS1,SMG1,HDGFL2,SAFB,KCMF1,POTEE,RPS14,CCDC88B,KIAA0232,SLC38A10,FKBP2,GTF2A2,ZNF627,ZNF638,ZNF207,SREK1,SCYL1,N4BP2,ZBTB37,CEP250,LYPLA1,ANKRD36C,ATP5MG,NUMA1,NDUFS7,SNRPG,UPF1,ZNF652,RBM6,ZNF37A,NONO,NIPBL,RANBP2,TCEAL3,ANKRD12,KRI1,KIF7,KIF3A,UBTF,MVD,RSF1,CNIH4,GAK,KIAA1109,RIF1,CRTAP,LUC7L,GCC2,OLA1,CTNNBL1,PPIA,RPL23A,POLD1,CCDC13…
TF	Factor: GABP-alpha; motif: CACTTCCGG	TF:M04698	4.4262443210826003e-7	6.353964617437803	3221	255	78	19917	RPL41,APOC2,SUPT4H1,BCKDHA,DMAC1,GOLGA4,GOLGA3,RPS14,SLC38A10,FKBP2,GTF2A2,ZBTB37,ATP5MG,NIPBL,GAK,GCC2,RPL23A,POLD1,TIMM8B,CCDC137,MTX3,PNISR,PTRHD1,NASP,PEX2,ELOC,ZNF221,CEP131,NFKBIL1,PPP2CA,PSMC5,RPL15,AXIN1,ARFRP1,MOB1B,RER1,EIF3CL,CDK11B,ZNF707,DAPK3,CCDC9,MINDY2,INTS1,C3ORF38,PSENEN,UBN2,BMS1,PAXX,RPS3A,ZGPAT,WDR46,TIMM13,KIF5B,SSR3,ZNF646,UBXN1,RBM15,DHX38,ASB1,PPAN,CMC4,HYPK,ZBTB17,ATAD2…
TF	Factor: E2F-1; motif: NNNSSCGCSAANN	TF:M07250	4.465428018602652e-7	6.350136906941559	10809	255	183	19917	LSM8,APOC2,SUPT4H1,SELENOT,DMAC1,GOLGA4,SAFB2,CNIH1,GOLGA3,ALMS1,SMG1,HDGFL2,SAFB,POTEE,RPS14,CCDC88B,KIAA0232,SLC38A10,ZNF627,ZNF638,ZNF207,SREK1,N4BP2,ZBTB37,CEP250,LYPLA1,ANKRD36C,ATP5MG,NUMA1,NDUFS7,SNRPG,COX7C,UPF1,ZNF652,RBM6,ZNF37A,NONO,NIPBL,RANBP2,ANKRD12,KRI1,KIF7,MMADHC,UBTF,MVD,RSF1,FKBP1A,GAK,RIF1,LUC7L,GCC2,PPIA,RPL23A,CCDC137,COMMD4,NDUFC2,YWHAQ,PNISR,TTBK2,METTL16,NASP,PEX2,FAM50A…
TF	Factor: Egr-1; motif: GCGCATGCG; match class: 1	TF:M04869_1	4.662327497257322e-7	6.3313972234674765	10315	255	177	19917	LSM8,SUPT4H1,MAGED4,SELENOT,BCKDHA,DMAC1,GOLGA4,INO80D,SAFB2,CNIH1,GOLGA3,ALMS1,SAFB,KCMF1,POTEE,KIAA0232,SLC38A10,FKBP2,ZNF627,ZNF638,SREK1,N4BP2,ZBTB37,CEP250,LYPLA1,ANKRD36C,ATP5MG,NUMA1,NDUFS7,UPF1,ZNF652,ZNF37A,NIPBL,RANBP2,TCEAL3,ANKRD12,KRI1,KIF7,KIF3A,MMADHC,UBTF,MVD,FKBP1A,CNIH4,GAK,KIAA1109,RIF1,LUC7L,PPIA,POLD1,TIMM8B,CCDC137,NDUFC2,MTX3,PNISR,PTRHD1,TTBK2,METTL16,NASP,PEX2,FAM50A,MBD3…
TF	Factor: NRF-1; motif: YGCGCMTGCGC; match class: 1	TF:M02102_1	4.994104901400978e-7	6.3015423395134835	657	255	29	19917	MAGED4,SELENOT,SAFB2,SAFB,ATP5MG,UPF1,ZNF652,KRI1,LUC7L,POLD1,TIMM8B,PNISR,PTRHD1,TTBK2,MBD3,PPP2CA,RAN,UBXN7,POLR2J3,DAZAP1,UBN2,TIMM13,RAB8A,SUGP2,AKAP13,ZBTB17,CKLF,TBCA,CCHCR1
TF	Factor: Elf-1; motif: NANCCGGAAGTN; match class: 1	TF:M11451_1	5.155151745167627e-7	6.287758546458251	2130	255	59	19917	APOC2,SUPT4H1,DMAC1,GOLGA3,KCMF1,RPS14,SLC38A10,FKBP2,GTF2A2,SREK1,N4BP2,ZBTB37,LYPLA1,SNRPG,NIPBL,FKBP1A,GAK,GCC2,CCDC137,PNISR,PEX2,ELOC,PSMC5,AXIN1,SAMD8,ARFRP1,RER1,CDK11B,ZNF707,INTS1,C3ORF38,PSENEN,BMS1,PAXX,RPS3A,ZGPAT,WDR46,TIMM13,CFAP410,DNAJC5,SSR3,ZNF646,DHX38,ASB1,PPAN,DDX54,HYPK,ATAD2B,ZNF721,STK19,DMAP1,SLX1A,ANTKMT,DPP8,ZSWIM9,SETD2,CCZ1B,CREBZF,RPA3
TF	Factor: c-Ets-1; motif: NNNRCCGGAWRYNNNN; match class: 1	TF:M01078_1	5.580622905657672e-7	6.253317322676861	2473	255	65	19917	SUPT4H1,DMAC1,GOLGA4,CNIH1,GOLGA3,RPS14,SLC38A10,FKBP2,GTF2A2,SREK1,N4BP2,ZBTB37,ATP5MG,SNRPG,COX7C,NIPBL,FKBP1A,GAK,RPL23A,CCDC137,MTX3,PNISR,NASP,PEX2,ELOC,NFKBIL1,PPP2CA,PSMC5,AXIN1,ARFRP1,RER1,CDK11B,ZNF707,DAPK3,INTS1,C3ORF38,TBL3,PSENEN,PAXX,TAF10,RPS3A,ZGPAT,WDR46,TIMM13,HNRNPLL,DNAJC5,SSR3,ZNF646,UBXN1,EWSR1,ASB1,PPAN,DDX54,ZNF721,STK19,HDAC4,CYTH2,FUNDC2,DMAP1,SLX1A,ANTKMT,DPP8,SETD2,CCZ…
TF	Factor: ELF4; motif: NCCGGAARTN	TF:M02056	5.678230811933586e-7	6.245786958003932	5379	255	111	19917	RPL41,APOC2,SUPT4H1,BCKDHA,DMAC1,CNIH1,GOLGA3,POTEE,RPS14,SLC38A10,FKBP2,GTF2A2,N4BP2,ZBTB37,ATP5MG,COX7C,RBM6,NONO,NIPBL,ANKRD12,MVD,FKBP1A,GAK,GCC2,PPIA,RPL23A,POLD1,TIMM8B,CCDC137,COMMD4,NDUFC2,MTX3,PNISR,PTRHD1,NASP,PEX2,ELOC,ZNF221,SREK1IP1,RNF139,CEP131,PPP2CA,ANKS3,CNOT7,SURF6,PSMC5,RPL15,AXIN1,SAMD8,ARFRP1,MOB1B,RER1,EIF3CL,ZNF707,DAPK3,CCDC9,TELO2,MINDY2,INTS1,C3ORF38,TBL3,PSENEN,UBN2,BM…
TF	Factor: Churchill; motif: CGGGNN; match class: 1	TF:M00986_1	5.933982685862658e-7	6.226653725199035	10429	255	178	19917	SUPT4H1,MAGED4,DMAC1,GOLGA4,INO80D,SAFB2,GOLGA3,ALMS1,SMG1,HDGFL2,SAFB,KCMF1,POTEE,RPS14,KIAA0232,SLC38A10,FKBP2,ZNF627,ZNF638,SREK1,SCYL1,N4BP2,ZBTB37,CEP250,LYPLA1,ANKRD36C,NUMA1,COX7C,UPF1,ZNF652,NONO,NIPBL,RANBP2,TCEAL3,ANKRD12,KRI1,KIF7,KIF3A,UBTF,MVD,RSF1,CNIH4,CRTAP,LUC7L,GCC2,PPIA,POLD1,CCDC137,COMMD4,YWHAQ,MTX3,TTBK2,METTL16,NASP,FAM50A,MBD3,ELOC,RNF139,CEP131,NFKBIL1,PPP2CA,CNOT7,SURF6,…
TF	Factor: E2F-1:TBR2; motif: NGGTGNNANGGCGCNNTNNCRNNN; match class: 1	TF:M08523_1	6.568333687608214e-7	6.182544792093586	7463	255	140	19917	RPL41,SUPT4H1,SELENOT,DMAC1,INO80D,SAFB2,CNIH1,GOLGA3,SMG1,SAFB,KCMF1,KIAA0232,SLC38A10,GTF2A2,ZNF627,ZNF638,SREK1,SCYL1,N4BP2,CEP250,LYPLA1,ANKRD36C,ATP5MG,NUMA1,SNRPG,COX7C,UPF1,RBM6,ZNF37A,NONO,RANBP2,TCEAL3,ANKRD12,KRI1,UBTF,MVD,FKBP1A,RIF1,CRTAP,LUC7L,PPIA,CCDC137,NDUFC2,YWHAQ,PTRHD1,TTBK2,FAM50A,MBD3,ZNF221,CEP131,PPP2CA,ANKS3,CNOT7,SURF6,RAN,EDF1,RRBP1,PURA,PSMC5,RPL15,AXIN1,UBXN7,HTATSF1,…
TF	Factor: ZF5; motif: NRNGNGCGCGCWN; match class: 1	TF:M00333_1	6.610880697835275e-7	6.179740680191831	12512	255	202	19917	LSM8,SUPT4H1,MAGED4,SELENOT,BCKDHA,GOLGA4,INO80D,SAFB2,CNIH1,GOLGA3,ALMS1,SMG1,SAFB,KCMF1,POTEE,KIAA0232,FKBP2,GTF2A2,ZNF638,SREK1,SCYL1,N4BP2,ZBTB37,CEP250,LYPLA1,ANKRD36C,NUMA1,NDUFS7,SNRPG,UPF1,ZNF652,RBM6,ZNF37A,NONO,NIPBL,RANBP2,TCEAL3,ANKRD12,KRI1,KIF7,KIF3A,UBTF,MVD,RSF1,FKBP1A,CNIH4,GAK,RIF1,CRTAP,GCC2,OLA1,TCEAL4,CTNNBL1,PPIA,RPL23A,POLD1,CCDC137,NDUFC2,YWHAQ,MTX3,PNISR,PTRHD1,TTBK2,METT…
TF	Factor: ETS1; motif: ACCGGAARYN	TF:M03977	6.737676936866638e-7	6.171489816729755	10612	255	180	19917	RPL41,LSM8,APOC2,SUPT4H1,MAGED4,SELENOT,DMAC1,GOLGA4,INO80D,CNIH1,GOLGA3,ALMS1,SMG1,HDGFL2,KCMF1,POTEE,RPS14,CCDC88B,SLC38A10,FKBP2,GTF2A2,ZNF627,ZNF638,SREK1,SCYL1,N4BP2,ZBTB37,LYPLA1,ATP5MG,NUMA1,NDUFS7,SNRPG,COX7C,UPF1,RBM6,NONO,NIPBL,ANKRD12,KRI1,MMADHC,UBTF,RSF1,FKBP1A,CNIH4,GAK,KIAA1109,RIF1,GCC2,RPL23A,POLD1,TIMM8B,CCDC137,COMMD4,NDUFC2,MTX3,PNISR,METTL16,NASP,PEX2,ELOC,ZNF221,SREK1IP1,RNF…
TF	Factor: c-Ets-1; motif: NNNRCCGGAWRYNNNN	TF:M01078	6.973611038194702e-7	6.156542279597925	7621	255	142	19917	RPL41,LSM8,APOC2,SUPT4H1,MAGED4,BCKDHA,DMAC1,GOLGA4,CNIH1,GOLGA3,ALMS1,HDGFL2,KCMF1,RPS14,CCDC88B,SLC38A10,FKBP2,GTF2A2,SREK1,SCYL1,N4BP2,ZBTB37,LYPLA1,ATP5MG,NUMA1,SNRPG,COX7C,UPF1,NIPBL,KRI1,MMADHC,FKBP1A,GAK,KIAA1109,RIF1,GCC2,RPL23A,POLD1,TIMM8B,CCDC137,MTX3,PNISR,PTRHD1,NASP,PEX2,ELOC,ZNF221,CEP131,NFKBIL1,PPP2CA,SURF6,RAN,RRBP1,PSMC5,RPL15,AXIN1,GRIPAP1,UBXN7,ARFRP1,MOB1B,RER1,EIF3CL,CDK11B…
TF	Factor: Rb:E2F-1:DP-1; motif: TTTSGCGC	TF:M00740	7.063486227452995e-7	6.150980897298085	10536	255	179	19917	RPL41,LSM8,APOC2,SUPT4H1,MAGED4,SELENOT,BCKDHA,DMAC1,GOLGA4,INO80D,CNIH1,GOLGA3,SMG1,HDGFL2,KCMF1,POTEE,RPS14,CCDC88B,KIAA0232,SLC38A10,ZNF627,ZNF638,ZNF207,SREK1,N4BP2,CEP250,LYPLA1,ATP5MG,NUMA1,NDUFS7,COX7C,UPF1,ZNF652,ZNF37A,NONO,NIPBL,RANBP2,TCEAL3,KRI1,KIF7,KIF3A,CSNK2A3,MMADHC,RSF1,CNIH4,GAK,KIAA1109,RIF1,LUC7L,GCC2,OLA1,CTNNBL1,PPIA,RPL23A,POLD1,TIMM8B,CCDC137,COMMD4,NDUFC2,YWHAQ,MTX3,PNIS…
TF	Factor: ERG; motif: ACCGGAART	TF:M01752	7.109978009434843e-7	6.148131742504534	9560	255	167	19917	RPL41,LSM8,APOC2,SUPT4H1,MAGED4,BCKDHA,DMAC1,GOLGA4,INO80D,CNIH1,GOLGA3,ALMS1,HDGFL2,KCMF1,POTEE,RPS14,CCDC88B,SLC38A10,FKBP2,GTF2A2,ZNF638,SREK1,SCYL1,N4BP2,ZBTB37,LYPLA1,ATP5MG,NUMA1,NDUFS7,SNRPG,COX7C,UPF1,RBM6,NONO,NIPBL,ANKRD12,MMADHC,MVD,FKBP1A,GAK,KIAA1109,RIF1,GCC2,PPIA,RPL23A,POLD1,TIMM8B,CCDC137,COMMD4,NDUFC2,MTX3,PNISR,PTRHD1,TTBK2,NASP,CHD2,PEX2,ELOC,ZNF221,SREK1IP1,RNF139,CEP131,NFKB…
TF	Factor: Elf-1; motif: NAANCMGGAAGTGN; match class: 1	TF:M09605_1	7.109978009434843e-7	6.148131742504534	1311	255	43	19917	SUPT4H1,KCMF1,RPS14,SLC38A10,FKBP2,GTF2A2,SREK1,N4BP2,FKBP1A,GAK,CCDC137,PNISR,NASP,PSMC5,AXIN1,POLR2J3,ARFRP1,RER1,CDK11B,ZNF707,CCDC9,ARHGAP4,PAXX,ZGPAT,WDR46,TIMM13,SUGP2,ZNF646,SLC25A5,ASB1,PPAN,DDX54,HYPK,PTPN11,ATAD2B,C6ORF47,DMAP1,ANTKMT,DPP8,SETD2,CCZ1B,CREBZF,RPA3
TF	Factor: ER81; motif: NNCCGGAWGYN	TF:M11419	7.753688129722269e-7	6.110491671250471	5760	255	116	19917	RPL41,LSM8,APOC2,SUPT4H1,DMAC1,GOLGA4,GOLGA3,HDGFL2,KCMF1,RPS14,SLC38A10,FKBP2,GTF2A2,SREK1,N4BP2,ZBTB37,LYPLA1,ATP5MG,NUMA1,SNRPG,COX7C,UPF1,NIPBL,KRI1,MMADHC,FKBP1A,GAK,KIAA1109,RIF1,GCC2,RPL23A,POLD1,TIMM8B,CCDC137,MTX3,PNISR,NASP,PEX2,ELOC,ZNF221,CEP131,NFKBIL1,PPP2CA,SURF6,PSMC5,AXIN1,GRIPAP1,UBXN7,ARFRP1,RER1,EIF3CL,CDK11B,ZNF707,DAPK3,CCDC9,TELO2,MINDY2,EIF2S3B,INTS1,C3ORF38,TBL3,PSENEN,EI…
TF	Factor: ETV4; motif: ACCGGAAGTN	TF:M03982	8.063755055712859e-7	6.093462672809255	6903	255	132	19917	RPL41,LSM8,APOC2,SUPT4H1,MAGED4,DMAC1,GOLGA4,CNIH1,GOLGA3,ALMS1,HDGFL2,KCMF1,RPS14,CCDC88B,SLC38A10,FKBP2,GTF2A2,ZNF638,SREK1,SCYL1,N4BP2,ZBTB37,LYPLA1,ATP5MG,NUMA1,SNRPG,COX7C,UPF1,RBM6,NIPBL,MMADHC,FKBP1A,GAK,KIAA1109,RIF1,GCC2,RPL23A,POLD1,TIMM8B,CCDC137,MTX3,PNISR,NASP,PEX2,ELOC,ZNF221,CEP131,NFKBIL1,SURF6,PSMC5,RPL15,AXIN1,UBXN7,POLR2J3,SAMD8,ARFRP1,RER1,EIF3CL,CDK11B,ZNF707,DAPK3,DAZAP1,CCD…
TF	Factor: Erg; motif: ACCGGAAGTN; match class: 1	TF:M02062_1	8.41971490597354e-7	6.074702613590457	2739	255	69	19917	APOC2,SUPT4H1,MAGED4,GOLGA4,INO80D,GOLGA3,ALMS1,KCMF1,RPS14,SLC38A10,FKBP2,GTF2A2,SREK1,N4BP2,ZBTB37,LYPLA1,ATP5MG,SNRPG,COX7C,FKBP1A,GAK,PPIA,RPL23A,CCDC137,MTX3,PNISR,NASP,PEX2,ELOC,SURF6,PSMC5,AXIN1,SAMD8,ARFRP1,RER1,CDK11B,ZNF707,DAZAP1,INTS1,TBL3,PSENEN,BMS1,PAXX,TAF10,ZGPAT,WDR46,TIMM13,HNRNPLL,SUGP2,DNAJC5,SSR3,ZNF646,EWSR1,ASB1,PPAN,DDX54,HYPK,ATAD2B,STK19,C6ORF47,CYTH2,FUNDC2,DMAP1,MAGEF…
TF	Factor: Elf-1; motif: ACTTCCGGG; match class: 1	TF:M04714_1	8.81699315902053e-7	6.0546794961705	2684	255	68	19917	APOC2,SUPT4H1,DMAC1,GOLGA4,GOLGA3,ALMS1,KCMF1,RPS14,SLC38A10,FKBP2,GTF2A2,SREK1,N4BP2,ZBTB37,LYPLA1,ATP5MG,SNRPG,NIPBL,FKBP1A,GAK,RPL23A,CCDC137,MTX3,PNISR,NASP,PEX2,ELOC,PSMC5,AXIN1,SAMD8,ARFRP1,RER1,CDK11B,ZNF707,INTS1,C3ORF38,PSENEN,BMS1,PAXX,RPS3A,ZGPAT,WDR46,TIMM13,SUGP2,DNAJC5,SSR3,ZNF646,UBXN1,EWSR1,DHX38,ASB1,PPAN,DDX54,HYPK,ATAD2B,ZNF721,STK19,FUNDC2,DMAP1,SLX1A,ANTKMT,DPP8,ZSWIM9,PPP1R2…
TF	Factor: SAP-1; motif: NRCCGGAWGYN	TF:M11437	8.91560311599737e-7	6.049849272669222	2803	255	70	19917	SUPT4H1,GOLGA3,RPS14,SLC38A10,FKBP2,GTF2A2,SREK1,N4BP2,ZBTB37,NUMA1,SNRPG,UPF1,NIPBL,FKBP1A,GAK,RPL23A,TIMM8B,MTX3,PNISR,NASP,PEX2,ZNF221,CEP131,NFKBIL1,SURF6,AXIN1,ARFRP1,RER1,EIF3CL,ZNF707,DAPK3,CCDC9,MINDY2,INTS1,C3ORF38,PSENEN,PAXX,ZGPAT,WDR46,TIMM13,RAB8A,HNRNPLL,SSR3,ZNF646,CANX,SLC25A5,RBM15,DHX38,ASB1,PPAN,DDX54,CMC4,HYPK,ZBTB17,ATAD2B,ZNF721,STK19,TMEM241,PAF1,TSR3,CYTH2,FUNDC2,DMAP1,MAG…
TF	Factor: ER71; motif: ACCGGAARYN; match class: 1	TF:M02067_1	8.941504071654605e-7	6.048589421351969	1630	255	49	19917	SUPT4H1,GOLGA3,RPS14,FKBP2,GTF2A2,SREK1,N4BP2,ZBTB37,ATP5MG,SNRPG,COX7C,FKBP1A,GAK,CCDC137,COMMD4,MTX3,NASP,PEX2,ELOC,SURF6,PSMC5,AXIN1,ARFRP1,RER1,ZNF707,CCDC9,INTS1,TBL3,PSENEN,BMS1,PAXX,TAF10,ZGPAT,WDR46,TIMM13,HNRNPLL,SSR3,ZNF646,ASB1,PPAN,ENGASE,STK19,C6ORF47,CYTH2,DMAP1,ANTKMT,DPP8,SETD2,RPA3
TF	Factor: ER71; motif: ACCGGAARYN	TF:M02067	0.0000010235646503613992	5.989884721239402	6001	255	119	19917	RPL41,LSM8,APOC2,SUPT4H1,DMAC1,CNIH1,GOLGA3,HDGFL2,KCMF1,RPS14,SLC38A10,FKBP2,GTF2A2,SREK1,N4BP2,ZBTB37,LYPLA1,ATP5MG,NUMA1,SNRPG,COX7C,UPF1,NONO,NIPBL,MMADHC,FKBP1A,GAK,RIF1,GCC2,RPL23A,POLD1,TIMM8B,CCDC137,COMMD4,MTX3,PNISR,NASP,PEX2,ELOC,ZNF221,SREK1IP1,RNF139,CEP131,SURF6,PSMC5,RPL15,AXIN1,GRIPAP1,UBXN7,ARFRP1,RER1,EIF3CL,CDK11B,ZNF707,DAPK3,CCDC9,MINDY2,INTS1,C3ORF38,TBL3,PSENEN,UBN2,BMS1,PA…
TF	Factor: ELF1; motif: NCCGGAARTN	TF:M02053	0.0000011686524604803668	5.932314622230983	6085	255	120	19917	RPL41,APOC2,SUPT4H1,INO80D,CNIH1,GOLGA3,KCMF1,POTEE,RPS14,SLC38A10,FKBP2,GTF2A2,N4BP2,ZBTB37,ATP5MG,NUMA1,SNRPG,COX7C,RBM6,NONO,NIPBL,ANKRD12,KRI1,MVD,FKBP1A,CNIH4,GAK,GCC2,PPIA,RPL23A,POLD1,TIMM8B,CCDC137,COMMD4,NDUFC2,MTX3,PNISR,NASP,PEX2,ELOC,ZNF221,SREK1IP1,RNF139,CEP131,NFKBIL1,PPP2CA,ANKS3,CNOT7,PSMC5,RPL15,AXIN1,SAMD8,ARFRP1,RER1,EIF3CL,DAPK3,CCDC9,TELO2,MINDY2,INTS1,C3ORF38,TBL3,PSENEN,EI…
TF	Factor: c-ets-1; motif: ACCGGAWGTN	TF:M02063	0.0000011752440349471205	5.92987194443337	7686	255	142	19917	RPL41,LSM8,APOC2,SUPT4H1,BCKDHA,DMAC1,GOLGA4,CNIH1,GOLGA3,ALMS1,HDGFL2,KCMF1,RPS14,SLC38A10,FKBP2,GTF2A2,SREK1,SCYL1,N4BP2,ZBTB37,LYPLA1,ATP5MG,NUMA1,SNRPG,COX7C,UPF1,RBM6,NIPBL,KRI1,MMADHC,FKBP1A,GAK,RIF1,GCC2,RPL23A,POLD1,TIMM8B,CCDC137,MTX3,PNISR,PTRHD1,NASP,CHD2,PEX2,ELOC,ZNF221,CEP131,NFKBIL1,PPP2CA,SURF6,RRBP1,PSMC5,RPL15,AXIN1,GRIPAP1,UBXN7,POLR2J3,SAMD8,ARFRP1,MOB1B,RER1,EIF3CL,CDK11B,ZNF…
TF	Factor: c-ets-1; motif: ACCGGAWGTN; match class: 1	TF:M02063_1	0.000001264594042880248	5.8980488683478285	2421	255	63	19917	SUPT4H1,DMAC1,GOLGA4,CNIH1,GOLGA3,HDGFL2,RPS14,SLC38A10,FKBP2,GTF2A2,SREK1,N4BP2,ZBTB37,ATP5MG,SNRPG,COX7C,NIPBL,FKBP1A,GAK,RPL23A,CCDC137,MTX3,PNISR,NASP,PEX2,ELOC,NFKBIL1,PPP2CA,PSMC5,AXIN1,ARFRP1,RER1,CDK11B,ZNF707,INTS1,C3ORF38,ARHGAP4,PSENEN,BMS1,PAXX,TAF10,RPS3A,ZGPAT,WDR46,TIMM13,HNRNPLL,SUGP2,SSR3,ZNF646,EWSR1,ASB1,PPAN,ZNF721,STK19,CYTH2,FUNDC2,DMAP1,SLX1A,ANTKMT,DPP8,SETD2,CCZ1B,RPA3
TF	Factor: Fli-1; motif: ACCGGAAGYN; match class: 1	TF:M02073_1	0.0000012886801639090912	5.889854856335554	1495	255	46	19917	SUPT4H1,GOLGA4,INO80D,GOLGA3,RPS14,FKBP2,GTF2A2,SREK1,N4BP2,ZBTB37,SNRPG,COX7C,FKBP1A,GAK,RPL23A,MTX3,PNISR,NASP,PEX2,SREK1IP1,AXIN1,SAMD8,ARFRP1,RER1,CDK11B,ZNF707,INTS1,PSENEN,PAXX,ZGPAT,WDR46,TIMM13,SSR3,ZNF646,EWSR1,ASB1,PPAN,ATAD2B,STK19,CYTH2,DMAP1,MAGEF1,ANTKMT,DPP8,SETD2,RPA3
TF	Factor: E2F-1; motif: TTTGGCGCCAAA	TF:M04516	0.000001373696348118503	5.862109256294455	11467	255	189	19917	RPL41,MAGED4,SELENOT,GOLGA4,INO80D,SAFB2,CNIH1,GOLGA3,ALMS1,SMG1,HDGFL2,SAFB,KCMF1,POTEE,CCDC88B,KIAA0232,SLC38A10,FKBP2,GTF2A2,ZNF638,ZNF207,SREK1,SCYL1,N4BP2,ZBTB37,CEP250,LYPLA1,ANKRD36C,ATP5MG,NUMA1,NDUFS7,SNRPG,COX7C,UPF1,ZNF652,RBM6,NIPBL,RANBP2,TCEAL3,ANKRD12,KRI1,UBTF,MVD,RSF1,CNIH4,GAK,RIF1,CRTAP,LUC7L,OLA1,PPIA,RPL23A,POLD1,CCDC137,COMMD4,NDUFC2,YWHAQ,MTX3,PNISR,TTBK2,METTL16,NASP,PEX2,…
TF	Factor: ETV7; motif: NNSCGGAAGTR	TF:M08760	0.0000013831855640445636	5.859119552331374	2371	255	62	19917	RPL41,APOC2,SUPT4H1,BCKDHA,DMAC1,GOLGA3,RPS14,SLC38A10,FKBP2,GTF2A2,ZBTB37,ATP5MG,NIPBL,GCC2,RPL23A,POLD1,CCDC137,MTX3,PNISR,PTRHD1,NASP,PEX2,ELOC,ZNF221,CEP131,NFKBIL1,PSMC5,RPL15,AXIN1,ARFRP1,MOB1B,RER1,EIF3CL,CDK11B,CCDC9,C3ORF38,PSENEN,UBN2,BMS1,RPS3A,ZGPAT,WDR46,TIMM13,KIF5B,ZNF646,UBXN1,DHX38,ASB1,PPAN,CMC4,ATAD2B,ZNF721,PAF1,TSR3,DMAP1,SLX1A,MAGEF1,ANTKMT,DPP8,ZSWIM9,CCZ1B,RPA3
TF	Factor: ETV7; motif: NCCGGAANNN	TF:M02071	0.0000013952846000516907	5.855337199110383	10214	255	174	19917	RPL41,LSM8,APOC2,SUPT4H1,MAGED4,SELENOT,DMAC1,GOLGA4,INO80D,CNIH1,GOLGA3,ALMS1,SMG1,KCMF1,POTEE,RPS14,CCDC88B,SLC38A10,FKBP2,GTF2A2,ZNF627,ZNF638,SREK1,SCYL1,N4BP2,ZBTB37,LYPLA1,ATP5MG,NUMA1,NDUFS7,SNRPG,COX7C,UPF1,RBM6,NONO,NIPBL,RANBP2,ANKRD12,KRI1,KIF3A,MMADHC,RSF1,FKBP1A,GAK,KIAA1109,RIF1,GCC2,RPL23A,TIMM8B,CCDC137,COMMD4,NDUFC2,MTX3,PNISR,METTL16,NASP,PEX2,MBD3,ELOC,ZNF221,SREK1IP1,RNF139,CE…
TF	Factor: NRF-1; motif: GCGCMTGCGCN; match class: 1	TF:M07052_1	0.000001406210803171391	5.8519495699338036	739	255	30	19917	MAGED4,SELENOT,SAFB2,SAFB,ATP5MG,UPF1,ZNF652,KRI1,GAK,LUC7L,POLD1,TIMM8B,PTRHD1,TTBK2,MBD3,RNF139,PPP2CA,RAN,UBXN7,DAZAP1,RPL10A,UBN2,TIMM13,RAB8A,SUGP2,DNAJC5,AKAP13,ZBTB17,CKLF,TBCA
TF	Factor: MAZ; motif: GGGMGGGGSSGGGGGGGGGGGG; match class: 1	TF:M09636_1	0.000001406210803171391	5.8519495699338036	14202	255	219	19917	RPL41,APOC2,SUPT4H1,MAGED4,BCKDHA,DMAC1,INO80D,SAFB2,CNIH1,GOLGA3,ALMS1,SMG1,HDGFL2,SAFB,KCMF1,POTEE,RPS14,CCDC88B,KIAA0232,SLC38A10,FKBP2,GTF2A2,ZNF627,ZNF638,ZNF207,SCYL1,N4BP2,ZBTB37,CEP250,LYPLA1,ANKRD36C,NUMA1,NDUFS7,COX7C,UPF1,ZNF652,RBM6,ZNF37A,NONO,NIPBL,RANBP2,TCEAL3,ANKRD12,KRI1,KIF7,KIF3A,MMADHC,UBTF,MVD,RSF1,FKBP1A,CNIH4,GAK,KIAA1109,RIF1,CRTAP,GCC2,OLA1,TCEAL4,CTNNBL1,PPIA,RPL23A,POL…
TF	Factor: E2F-4; motif: TTTTGGCGCCAWWN	TF:M11535	0.0000014266863391610302	5.84567149720403	10966	255	183	19917	RPL41,LSM8,MAGED4,SELENOT,BCKDHA,GOLGA4,INO80D,SAFB2,CNIH1,ALMS1,SMG1,HDGFL2,SAFB,KCMF1,POTEE,RPS14,CCDC88B,KIAA0232,SLC38A10,FKBP2,GTF2A2,ZNF627,ZNF638,ZNF207,SREK1,SCYL1,N4BP2,CEP250,LYPLA1,ANKRD36C,ATP5MG,NUMA1,NDUFS7,SNRPG,COX7C,UPF1,ZNF37A,NIPBL,RANBP2,TCEAL3,ANKRD12,KRI1,KIF3A,UBTF,MVD,RSF1,GAK,RIF1,CRTAP,LUC7L,GCC2,OLA1,PPIA,RPL23A,POLD1,TIMM8B,CCDC137,COMMD4,YWHAQ,MTX3,PNISR,TTBK2,NASP,FA…
TF	Factor: IRX-1; motif: NACRYNNNNNNNNRYGNN; match class: 1	TF:M11018_1	0.0000014798678004175903	5.829777079276332	16079	255	237	19917	RPL41,UQCRHL,LSM8,SUPT4H1,SELENOT,BCKDHA,DMAC1,GOLGA4,INO80D,SAFB2,CNIH1,GOLGA3,ALMS1,SMG1,HDGFL2,SAFB,KCMF1,POTEE,RPS14,CCDC88B,KIAA0232,SLC38A10,FKBP2,GTF2A2,ZNF627,ZNF638,ZNF207,SREK1,SCYL1,N4BP2,ZBTB37,CEP250,LYPLA1,ANKRD36C,ATP5MG,NUMA1,NDUFS7,SNRPG,COX7C,UPF1,ZNF652,RBM6,ZNF37A,NONO,NIPBL,RANBP2,TCEAL3,ANKRD12,KRI1,KIF7,KIF3A,CSNK2A3,MMADHC,UBTF,MVD,RSF1,FKBP1A,CNIH4,GAK,KIAA1109,RIF1,CRTAP…
TF	Factor: meis1:Elf-1; motif: NTGCCGGAAGTN; match class: 1	TF:M08377_1	0.0000015613996393416027	5.806485925286414	5084	255	105	19917	RPL41,LSM8,SUPT4H1,BCKDHA,DMAC1,GOLGA4,GOLGA3,KCMF1,RPS14,KIAA0232,SLC38A10,FKBP2,GTF2A2,ZBTB37,COX7C,UPF1,ZNF652,ZNF37A,NONO,NIPBL,ANKRD12,KRI1,FKBP1A,CNIH4,GAK,CRTAP,OLA1,PPIA,RPL23A,TIMM8B,CCDC137,COMMD4,MTX3,PNISR,PEX2,FAM50A,MBD3,RNF139,NFKBIL1,SURF6,RAN,PSMC5,RPL15,AXIN1,SAMD8,ARFRP1,RER1,CDK11B,ZNF707,GOLGB1,CCDC9,RPL10A,MINDY2,INTS1,C3ORF38,TBL3,PSENEN,BMS1,RPS3A,ZGPAT,WDR46,TIMM13,RAB8A,…
TF	Factor: E2F-1; motif: NKTSSCGC	TF:M00428	0.0000015676534778067366	5.804749929730664	9030	255	159	19917	UQCRHL,SELENOT,GOLGA4,SAFB2,GOLGA3,SMG1,HDGFL2,SAFB,POTEE,RPS14,CCDC88B,KIAA0232,SLC38A10,GTF2A2,ZNF627,ZNF638,ZNF207,N4BP2,ZBTB37,CEP250,LYPLA1,ANKRD36C,ATP5MG,NUMA1,NDUFS7,COX7C,UPF1,RBM6,NONO,NIPBL,RANBP2,TCEAL3,ANKRD12,KRI1,KIF7,KIF3A,UBTF,MVD,FKBP1A,CNIH4,RIF1,CRTAP,LUC7L,GCC2,PPIA,RPL23A,TIMM8B,CCDC137,COMMD4,YWHAQ,PNISR,TTBK2,METTL16,NASP,FAM50A,MBD3,RNF139,CEP131,PPP2CA,CNOT7,SURF6,EDF1,R…
TF	Factor: Elk-1; motif: NACMGGAAGTN	TF:M11432	0.0000016716421744713625	5.776856680415983	6201	255	121	19917	RPL41,LSM8,APOC2,SUPT4H1,DMAC1,GOLGA3,ALMS1,HDGFL2,RPS14,SLC38A10,FKBP2,GTF2A2,ZNF207,SREK1,SCYL1,N4BP2,ZBTB37,LYPLA1,ATP5MG,NUMA1,SNRPG,COX7C,UPF1,NIPBL,MMADHC,FKBP1A,GAK,RIF1,GCC2,RPL23A,POLD1,TIMM8B,CCDC137,MTX3,PNISR,NASP,CHD2,PEX2,ELOC,ZNF221,CEP131,NFKBIL1,SURF6,PURA,PSMC5,AXIN1,UBXN7,POLR2J3,ARFRP1,RER1,EIF3CL,CDK11B,ZNF707,GOLGB1,DAPK3,CCDC9,MINDY2,EIF2S3B,PCBP2,INTS1,C3ORF38,ARHGAP4,PSEN…
TF	Factor: Erm; motif: NNSCGGAWGYN; match class: 1	TF:M11424_1	0.0000017943281585533118	5.746098127392354	2861	255	70	19917	APOC2,SUPT4H1,DMAC1,GOLGA3,ALMS1,KCMF1,RPS14,SLC38A10,FKBP2,GTF2A2,SREK1,N4BP2,ZBTB37,LYPLA1,ATP5MG,NUMA1,SNRPG,UPF1,NIPBL,FKBP1A,GAK,KIAA1109,RPL23A,CCDC137,PNISR,NASP,PEX2,PSMC5,AXIN1,ARFRP1,RER1,CDK11B,ZNF707,CCDC9,INTS1,C3ORF38,TBL3,PSENEN,BMS1,PAXX,TAF10,RPS3A,ZGPAT,WDR46,TIMM13,HNRNPLL,SUGP2,SSR3,RNF2,ZNF646,UBXN1,EWSR1,ASB1,PPAN,DDX54,HYPK,ATAD2B,ZNF721,STK19,HDAC4,CYTH2,FUNDC2,DMAP1,SLX1A…
TF	Factor: GABP-alpha; motif: NRCCGGAAGTN	TF:M11415	0.0000018643582056916968	5.729470641440439	3289	255	77	19917	SUPT4H1,DMAC1,GOLGA3,RPS14,SLC38A10,FKBP2,GTF2A2,SREK1,N4BP2,ZBTB37,ATP5MG,SNRPG,UPF1,NIPBL,MMADHC,FKBP1A,GAK,RIF1,RPL23A,TIMM8B,CCDC137,MTX3,PNISR,NASP,PEX2,ZNF221,CEP131,SURF6,AXIN1,UBXN7,ARFRP1,RER1,EIF3CL,ZNF707,DAPK3,CCDC9,MINDY2,INTS1,C3ORF38,PSENEN,BMS1,PAXX,ZGPAT,WDR46,TIMM13,RAB8A,HNRNPLL,SUGP2,SSR3,ZNF646,SLC25A5,EWSR1,RBM15,DHX38,ASB1,PPAN,CMC4,HYPK,ZBTB17,ATAD2B,ZNF721,STK19,TMEM241,P…
TF	Factor: NRF-1; motif: CNCTGCGCATGCGC; match class: 1	TF:M04694_1	0.0000019732206449017216	5.704824349362342	466	255	23	19917	LSM8,SELENOT,SAFB2,SAFB,CEP250,NDUFS7,UPF1,ZNF652,KRI1,FKBP1A,LUC7L,PNISR,MBD3,UBXN7,TIMM13,RAB8A,KIF5B,SMG6,SUGP2,OSER1,SNRNP70,EWSR1,NXF1
TF	Factor: meis1:Elf-1; motif: NTGCCGGAAGTN	TF:M08377	0.000002249193398347754	5.647973199867129	11363	255	187	19917	RPL41,LSM8,APOC2,SUPT4H1,BCKDHA,DMAC1,GOLGA4,INO80D,CNIH1,GOLGA3,ALMS1,SMG1,KCMF1,POTEE,RPS14,CCDC88B,KIAA0232,SLC38A10,FKBP2,GTF2A2,ZNF627,ZNF638,ZNF207,SREK1,SCYL1,N4BP2,ZBTB37,CEP250,ANKRD36C,ATP5MG,SNRPG,COX7C,UPF1,ZNF652,ZNF37A,NONO,NIPBL,TCEAL3,ANKRD12,KRI1,KIF3A,CSNK2A3,MMADHC,RSF1,FKBP1A,CNIH4,GAK,CRTAP,OLA1,TCEAL4,CTNNBL1,PPIA,RPL23A,TIMM8B,CCDC137,COMMD4,NDUFC2,YWHAQ,MTX3,PNISR,PTRHD1,T…
TF	Factor: EHF; motif: CSCGGAARTN	TF:M02052	0.000002304421331694137	5.637438113225856	10199	255	173	19917	RPL41,LSM8,APOC2,SUPT4H1,SELENOT,BCKDHA,DMAC1,GOLGA4,CNIH1,GOLGA3,ALMS1,HDGFL2,KCMF1,RPS14,CCDC88B,KIAA0232,SLC38A10,FKBP2,GTF2A2,ZNF638,ZNF207,SREK1,SCYL1,N4BP2,ZBTB37,LYPLA1,ATP5MG,NUMA1,SNRPG,COX7C,UPF1,NIPBL,TCEAL3,KRI1,KIF7,MMADHC,UBTF,MVD,FKBP1A,GAK,KIAA1109,RIF1,CRTAP,GCC2,OLA1,CTNNBL1,PPIA,RPL23A,POLD1,TIMM8B,CCDC137,COMMD4,YWHAQ,MTX3,PNISR,PTRHD1,NASP,PEX2,FAM50A,MBD3,ELOC,ZNF221,SREK1IP…
TF	Factor: ZF5; motif: GSGCGCGR	TF:M00716	0.000002387276196046916	5.622097332363167	16245	255	238	19917	RPL41,LSM8,SUPT4H1,MAGED4,SELENOT,BCKDHA,DMAC1,INO80D,SAFB2,CNIH1,GOLGA3,ALMS1,SMG1,HDGFL2,SAFB,KCMF1,POTEE,RPS14,KIAA0232,SLC38A10,FKBP2,GTF2A2,ZNF627,ZNF638,ZNF207,SREK1,SCYL1,N4BP2,ZBTB37,CEP250,LYPLA1,ANKRD36C,ATP5MG,NUMA1,NDUFS7,SNRPG,COX7C,UPF1,ZNF652,RBM6,ZNF37A,NONO,NIPBL,RANBP2,TCEAL3,ANKRD12,KRI1,KIF7,KIF3A,UBTF,MVD,RSF1,FKBP1A,CNIH4,GAK,KIAA1109,RIF1,CRTAP,LUC7L,GCC2,OLA1,TCEAL4,CTNNBL…
TF	Factor: E2F-1; motif: WWTGGCGCCAAA; match class: 1	TF:M04515_1	0.0000030566350343784225	5.514756413422374	12267	255	197	19917	LSM8,MAGED4,SELENOT,GOLGA4,INO80D,SAFB2,CNIH1,GOLGA3,ALMS1,SMG1,HDGFL2,SAFB,KCMF1,POTEE,CCDC88B,KIAA0232,SLC38A10,FKBP2,GTF2A2,ZNF638,ZNF207,SREK1,SCYL1,N4BP2,ZBTB37,CEP250,LYPLA1,ANKRD36C,ATP5MG,NUMA1,NDUFS7,SNRPG,UPF1,ZNF652,RBM6,NIPBL,RANBP2,TCEAL3,ANKRD12,KRI1,KIF7,UBTF,MVD,RSF1,CNIH4,GAK,KIAA1109,RIF1,CRTAP,LUC7L,GCC2,OLA1,PPIA,RPL23A,POLD1,CCDC137,COMMD4,NDUFC2,YWHAQ,MTX3,PNISR,TTBK2,METTL1…
TF	Factor: E2F-1; motif: WWTGGCGCCAAA	TF:M04515	0.0000030850013793270396	5.5107446374544065	13444	255	210	19917	RPL41,LSM8,MAGED4,SELENOT,BCKDHA,GOLGA4,INO80D,SAFB2,CNIH1,GOLGA3,ALMS1,SMG1,HDGFL2,SAFB,KCMF1,POTEE,CCDC88B,KIAA0232,SLC38A10,FKBP2,GTF2A2,ZNF627,ZNF638,ZNF207,SREK1,SCYL1,N4BP2,ZBTB37,CEP250,LYPLA1,ANKRD36C,ATP5MG,NUMA1,NDUFS7,SNRPG,COX7C,UPF1,ZNF652,RBM6,NIPBL,RANBP2,TCEAL3,ANKRD12,KRI1,KIF7,KIF3A,UBTF,MVD,RSF1,CNIH4,GAK,KIAA1109,RIF1,CRTAP,LUC7L,GCC2,OLA1,PPIA,RPL23A,POLD1,CCDC137,COMMD4,NDUF…
TF	Factor: E2F-2; motif: NWTTTGGCGCCAWWNN; match class: 1	TF:M11530_1	0.0000037929189578048187	5.421026436641839	13561	255	211	19917	RPL41,LSM8,MAGED4,SELENOT,GOLGA4,INO80D,SAFB2,CNIH1,GOLGA3,ALMS1,SMG1,HDGFL2,SAFB,KCMF1,POTEE,RPS14,CCDC88B,KIAA0232,SLC38A10,FKBP2,GTF2A2,ZNF627,ZNF638,ZNF207,SREK1,SCYL1,N4BP2,ZBTB37,CEP250,LYPLA1,ANKRD36C,ATP5MG,NUMA1,NDUFS7,SNRPG,COX7C,UPF1,ZNF652,RBM6,ZNF37A,NIPBL,RANBP2,TCEAL3,ANKRD12,KRI1,KIF7,UBTF,MVD,RSF1,CNIH4,GAK,KIAA1109,RIF1,CRTAP,LUC7L,GCC2,OLA1,PPIA,RPL23A,POLD1,CCDC137,COMMD4,NDUF…
TF	Factor: Elf-1; motif: AWCCCGGAAGTN	TF:M07415	0.000003920703065461092	5.406636047757149	8060	255	145	19917	LSM8,APOC2,SUPT4H1,MAGED4,SELENOT,DMAC1,GOLGA4,GOLGA3,ALMS1,SMG1,HDGFL2,KCMF1,RPS14,CCDC88B,SLC38A10,FKBP2,GTF2A2,ZNF638,SREK1,SCYL1,N4BP2,ZBTB37,LYPLA1,ANKRD36C,ATP5MG,NUMA1,SNRPG,COX7C,UPF1,RBM6,NIPBL,TCEAL3,KRI1,MMADHC,FKBP1A,GAK,KIAA1109,RIF1,RPL23A,TIMM8B,CCDC137,NDUFC2,MTX3,PNISR,TTC3,NASP,PEX2,ZNF221,CEP131,SURF6,PSMC5,RPL15,AXIN1,UBXN7,POLR2J3,SAMD8,ARFRP1,RER1,EIF3CL,CDK11B,ZNF707,DAPK3,…
TF	Factor: PEA3; motif: NACCGGAAGTN; match class: 1	TF:M11427_1	0.000004154929650451284	5.3814363251119905	4645	255	97	19917	APOC2,SUPT4H1,MAGED4,DMAC1,GOLGA4,GOLGA3,ALMS1,HDGFL2,KCMF1,RPS14,CCDC88B,SLC38A10,FKBP2,GTF2A2,SREK1,N4BP2,ZBTB37,LYPLA1,ATP5MG,NUMA1,SNRPG,COX7C,NIPBL,FKBP1A,GAK,KIAA1109,RPL23A,CCDC137,MTX3,PNISR,NASP,PEX2,ELOC,NFKBIL1,PPP2CA,RAN,PSMC5,RPL15,AXIN1,POLR2J3,SAMD8,ARFRP1,RER1,CDK11B,ZNF707,DAPK3,DAZAP1,INTS1,C3ORF38,TBL3,PSENEN,BMS1,PAXX,TAF10,RPS3A,ZGPAT,WDR46,TIMM13,UBE2D2,HNRNPLL,KIF5B,SUGP2,D…
TF	Factor: Erm; motif: ACCGGAAGTN	TF:M02069	0.000004553311247757235	5.341672661889615	6961	255	130	19917	LSM8,APOC2,SUPT4H1,DMAC1,GOLGA4,CNIH1,GOLGA3,ALMS1,KCMF1,POTEE,RPS14,CCDC88B,SLC38A10,FKBP2,GTF2A2,ZNF638,SREK1,SCYL1,N4BP2,ZBTB37,LYPLA1,ATP5MG,NUMA1,SNRPG,COX7C,UPF1,RBM6,NIPBL,ANKRD12,KRI1,MMADHC,FKBP1A,GAK,KIAA1109,RIF1,RPL23A,TIMM8B,CCDC137,COMMD4,NDUFC2,MTX3,PNISR,NASP,PEX2,ZNF221,CEP131,NFKBIL1,ANKS3,SURF6,RPL15,AXIN1,UBXN7,SAMD8,ARFRP1,RER1,EIF3CL,CDK11B,ZNF707,DAPK3,CCDC9,TELO2,MINDY2,EI…
TF	Factor: ETV3; motif: ACCGGAAGTN	TF:M03981	0.000004706674155219495	5.327285867019192	2346	255	60	19917	RPL41,APOC2,SUPT4H1,GOLGA3,RPS14,SLC38A10,FKBP2,GTF2A2,ZBTB37,NIPBL,GAK,GCC2,RPL23A,POLD1,TIMM8B,CCDC137,MTX3,PNISR,NASP,PEX2,ZNF221,CEP131,NFKBIL1,AXIN1,ARFRP1,RER1,EIF3CL,DAPK3,CCDC9,MINDY2,INTS1,C3ORF38,PSENEN,PAXX,ZGPAT,WDR46,TIMM13,KIF5B,SSR3,SNRNP70,ZNF646,UBXN1,CANX,RBM15,ASB1,PPAN,CMC4,HYPK,ZBTB17,PAF1,TSR3,DMAP1,FAM199X,SLX1A,MAGEF1,ANTKMT,DPP8,ZSWIM9,CREBZF,RPA3
TF	Factor: GCMa:PEA3; motif: ATRCGGGCGGAAGTR; match class: 1	TF:M08313_1	0.000004706674155219495	5.327285867019192	9802	255	167	19917	RPL41,LSM8,SUPT4H1,SELENOT,BCKDHA,DMAC1,GOLGA4,SAFB2,GOLGA3,ALMS1,SMG1,SAFB,KCMF1,CCDC88B,KIAA0232,SLC38A10,FKBP2,GTF2A2,ZNF207,SREK1,SCYL1,N4BP2,CEP250,LYPLA1,ANKRD36C,ATP5MG,NUMA1,SNRPG,COX7C,UPF1,ZNF652,ZNF37A,NIPBL,RANBP2,TCEAL3,KRI1,KIF7,KIF3A,MMADHC,UBTF,RSF1,GAK,CRTAP,GCC2,OLA1,TCEAL4,CTNNBL1,PPIA,POLD1,TIMM8B,CCDC137,COMMD4,NDUFC2,YWHAQ,PNISR,PTRHD1,TTBK2,METTL16,MBD3,ELOC,RNF139,CEP131,N…
TF	Factor: E2F-3:HES-7; motif: NNNSGCGCSNNNNNCRCGYGNN	TF:M08526	0.000004810317287830057	5.317826276680398	17025	255	244	19917	RPL41,UQCRHL,LSM8,APOC2,SUPT4H1,MAGED4,SELENOT,BCKDHA,DMAC1,GOLGA4,INO80D,SAFB2,CNIH1,GOLGA3,ALMS1,SMG1,HDGFL2,SAFB,KCMF1,POTEE,RPS14,CCDC88B,KIAA0232,SLC38A10,FKBP2,GTF2A2,ZNF627,ZNF638,ZNF207,SREK1,SCYL1,N4BP2,ZBTB37,CEP250,LYPLA1,ANKRD36C,ATP5MG,NUMA1,NDUFS7,SNRPG,COX7C,UPF1,ZNF652,RBM6,ZNF37A,NONO,NIPBL,RANBP2,TCEAL3,ANKRD12,KRI1,KIF7,KIF3A,MMADHC,UBTF,MVD,RSF1,FKBP1A,CNIH4,GAK,KIAA1109,RIF1,…
TF	Factor: Erg; motif: NNACCGGAARTSN	TF:M09608	0.000005323211744434789	5.273826258303928	8251	255	147	19917	RPL41,APOC2,SUPT4H1,MAGED4,DMAC1,INO80D,CNIH1,GOLGA3,HDGFL2,POTEE,RPS14,SLC38A10,FKBP2,GTF2A2,SREK1,N4BP2,ZBTB37,LYPLA1,ATP5MG,NDUFS7,SNRPG,COX7C,RBM6,NIPBL,TCEAL3,ANKRD12,KRI1,MMADHC,MVD,FKBP1A,GAK,RIF1,GCC2,PPIA,RPL23A,POLD1,TIMM8B,CCDC137,COMMD4,NDUFC2,MTX3,PNISR,TTBK2,NASP,CHD2,PEX2,MBD3,ELOC,ZNF221,SREK1IP1,CEP131,NFKBIL1,PPP2CA,ANKS3,CNOT7,EDF1,PSMC5,RPL15,AXIN1,UBXN7,POLR2J3,SAMD8,HTATSF1,…
TF	Factor: Sp1; motif: NGGGGCGGGGN	TF:M07395	0.000005518402024733454	5.258186663631511	10721	255	178	19917	RPL41,LSM8,SUPT4H1,MAGED4,DMAC1,GOLGA4,INO80D,SAFB2,GOLGA3,ALMS1,SMG1,HDGFL2,SAFB,KCMF1,POTEE,CCDC88B,KIAA0232,SLC38A10,FKBP2,GTF2A2,ZNF627,ZNF638,ZNF207,SCYL1,ZBTB37,CEP250,LYPLA1,ANKRD36C,NUMA1,COX7C,UPF1,ZNF652,RBM6,ZNF37A,NONO,NIPBL,TCEAL3,ANKRD12,KRI1,KIF7,KIF3A,UBTF,MVD,RSF1,KIAA1109,RIF1,CRTAP,GCC2,OLA1,CTNNBL1,PPIA,POLD1,CCDC137,COMMD4,NDUFC2,YWHAQ,MTX3,PTRHD1,NASP,FAM50A,MBD3,RNF139,CEP1…
TF	Factor: PEA3; motif: NACCGGAAGTN	TF:M11430	0.000005582716318724125	5.253154439916518	10973	255	181	19917	RPL41,LSM8,APOC2,SUPT4H1,MAGED4,BCKDHA,DMAC1,GOLGA4,INO80D,CNIH1,GOLGA3,ALMS1,HDGFL2,KCMF1,POTEE,RPS14,CCDC88B,SLC38A10,FKBP2,GTF2A2,ZNF638,SREK1,SCYL1,N4BP2,ZBTB37,LYPLA1,ANKRD36C,ATP5MG,NUMA1,NDUFS7,SNRPG,COX7C,UPF1,ZNF652,RBM6,ZNF37A,NONO,NIPBL,ANKRD12,KRI1,MMADHC,RSF1,FKBP1A,GAK,KIAA1109,RIF1,LUC7L,GCC2,CTNNBL1,RPL23A,POLD1,TIMM8B,CCDC137,COMMD4,NDUFC2,MTX3,PNISR,PTRHD1,NASP,PEX2,ELOC,ZNF221,…
TF	Factor: nerf; motif: NNNCCGGAAGTGN; match class: 1	TF:M09901_1	0.000005763687798095358	5.239299551667304	1375	255	42	19917	APOC2,SUPT4H1,GOLGA3,KCMF1,RPS14,SLC38A10,FKBP2,GTF2A2,SREK1,ZBTB37,SNRPG,NIPBL,FKBP1A,GAK,CCDC137,PNISR,NASP,PSMC5,AXIN1,ARFRP1,RER1,INTS1,PAXX,ZGPAT,WDR46,TIMM13,SUGP2,ZNF646,ASB1,PPAN,DDX54,HYPK,ATAD2B,ZNF721,FUNDC2,DMAP1,SLX1A,ANTKMT,DPP8,SETD2,CCZ1B,RPA3
TF	Factor: FEV; motif: ACCGGAAGTN	TF:M03987	0.000005763687798095358	5.239299551667304	1324	255	41	19917	SUPT4H1,GOLGA3,FKBP2,GTF2A2,NIPBL,GAK,RPL23A,TIMM8B,NASP,PEX2,ZNF221,CEP131,AXIN1,ARFRP1,DAPK3,CCDC9,MINDY2,INTS1,C3ORF38,PSENEN,PAXX,ZGPAT,WDR46,TIMM13,SSR3,ZNF646,RBM15,ASB1,PPAN,CMC4,HYPK,ZBTB17,PAF1,TSR3,DMAP1,MAGEF1,ANTKMT,DPP8,ZSWIM9,CREBZF,RPA3
TF	Factor: E2F-4; motif: SNGGGCGGGAANN	TF:M09894	0.000005925987660001821	5.227239257209443	16345	255	238	19917	RPL41,UQCRHL,LSM8,SUPT4H1,MAGED4,SELENOT,DMAC1,GOLGA4,INO80D,SAFB2,GOLGA3,ALMS1,SMG1,HDGFL2,SAFB,KCMF1,POTEE,RPS14,CCDC88B,KIAA0232,SLC38A10,FKBP2,GTF2A2,ZNF627,ZNF638,ZNF207,SREK1,SCYL1,N4BP2,ZBTB37,CEP250,LYPLA1,ANKRD36C,ATP5MG,NUMA1,NDUFS7,SNRPG,COX7C,UPF1,ZNF652,RBM6,ZNF37A,NONO,NIPBL,RANBP2,TCEAL3,ANKRD12,KRI1,KIF7,KIF3A,CSNK2A3,UBTF,MVD,RSF1,FKBP1A,CNIH4,GAK,KIAA1109,RIF1,CRTAP,LUC7L,GCC2,O…
TF	Factor: Elf-1; motif: NANSCGGAAGTR	TF:M11450	0.000005925987660001821	5.227239257209443	5640	255	111	19917	RPL41,APOC2,SUPT4H1,BCKDHA,DMAC1,GOLGA4,GOLGA3,POTEE,RPS14,SLC38A10,FKBP2,GTF2A2,SREK1,ZBTB37,LYPLA1,ATP5MG,COX7C,ZNF37A,NIPBL,KIF3A,MMADHC,GAK,RIF1,GCC2,OLA1,CTNNBL1,RPL23A,POLD1,TIMM8B,CCDC137,MTX3,PNISR,PTRHD1,NASP,PEX2,ELOC,ZNF221,CEP131,NFKBIL1,PPP2CA,RRBP1,PSMC5,RPL15,AXIN1,GRIPAP1,POLR2J3,SAMD8,ARFRP1,MOB1B,RER1,EIF3CL,CDK11B,ZNF707,DAPK3,CCDC9,MINDY2,INTS1,C3ORF38,TBL3,PSENEN,UBN2,BMS1,PA…
TF	Factor: ETV4; motif: ACCGGAAGTN; match class: 1	TF:M03982_1	0.000006157661123807803	5.210584215418193	2026	255	54	19917	APOC2,SUPT4H1,GOLGA3,ALMS1,KCMF1,RPS14,SLC38A10,FKBP2,GTF2A2,SREK1,N4BP2,ZBTB37,LYPLA1,ATP5MG,SNRPG,COX7C,FKBP1A,GAK,RPL23A,CCDC137,MTX3,PNISR,NASP,PEX2,AXIN1,SAMD8,ARFRP1,RER1,ZNF707,INTS1,PSENEN,PAXX,ZGPAT,WDR46,TIMM13,SUGP2,DNAJC5,SSR3,ZNF646,EWSR1,ASB1,PPAN,DDX54,HYPK,ATAD2B,STK19,CYTH2,FUNDC2,DMAP1,ANTKMT,DPP8,SETD2,CREBZF,RPA3
TF	Factor: ZF5; motif: GGSGCGCGS	TF:M10438	0.000007711213425347736	5.112877276622475	16373	255	238	19917	RPL41,LSM8,SUPT4H1,MAGED4,SELENOT,BCKDHA,DMAC1,GOLGA4,INO80D,SAFB2,CNIH1,GOLGA3,ALMS1,SMG1,HDGFL2,SAFB,KCMF1,POTEE,RPS14,KIAA0232,SLC38A10,FKBP2,GTF2A2,ZNF627,ZNF638,ZNF207,SREK1,SCYL1,N4BP2,ZBTB37,CEP250,LYPLA1,ANKRD36C,ATP5MG,NUMA1,NDUFS7,SNRPG,COX7C,UPF1,ZNF652,RBM6,ZNF37A,NONO,NIPBL,RANBP2,TCEAL3,ANKRD12,KRI1,KIF7,KIF3A,MMADHC,UBTF,MVD,RSF1,FKBP1A,CNIH4,GAK,RIF1,CRTAP,LUC7L,GCC2,OLA1,TCEAL4,C…
TF	Factor: E2F-1; motif: NGGGCGGGARV	TF:M07206	0.000007737953843165194	5.111373865170272	14705	255	222	19917	RPL41,LSM8,SUPT4H1,MAGED4,SELENOT,GOLGA4,INO80D,SAFB2,CNIH1,GOLGA3,ALMS1,SMG1,HDGFL2,SAFB,KCMF1,POTEE,RPS14,KIAA0232,SLC38A10,FKBP2,GTF2A2,ZNF627,ZNF638,ZNF207,SREK1,SCYL1,N4BP2,ZBTB37,CEP250,LYPLA1,ANKRD36C,ATP5MG,NUMA1,NDUFS7,SNRPG,COX7C,UPF1,ZNF652,RBM6,ZNF37A,NONO,NIPBL,RANBP2,TCEAL3,ANKRD12,KRI1,KIF7,KIF3A,UBTF,MVD,RSF1,FKBP1A,GAK,KIAA1109,RIF1,CRTAP,LUC7L,GCC2,OLA1,CTNNBL1,PPIA,POLD1,TIMM8B…
TF	Factor: TEL1; motif: CNCGGAANNN	TF:M02070	0.000007985999557765699	5.097670718191258	10938	255	180	19917	RPL41,UQCRHL,LSM8,APOC2,SUPT4H1,MAGED4,SELENOT,BCKDHA,DMAC1,GOLGA4,CNIH1,GOLGA3,ALMS1,SMG1,HDGFL2,KCMF1,RPS14,CCDC88B,SLC38A10,FKBP2,GTF2A2,ZNF638,ZNF207,SREK1,SCYL1,N4BP2,ZBTB37,LYPLA1,ATP5MG,NUMA1,COX7C,UPF1,RBM6,ZNF37A,NONO,NIPBL,RANBP2,TCEAL3,ANKRD12,KRI1,KIF7,KIF3A,MMADHC,UBTF,FKBP1A,GAK,RIF1,LUC7L,GCC2,PPIA,RPL23A,POLD1,TIMM8B,CCDC137,NDUFC2,YWHAQ,MTX3,PNISR,PTRHD1,TTBK2,METTL16,NASP,PEX2,F…
TF	Factor: TCF-1; motif: ACATCGRGRCGCTGW; match class: 1	TF:M11603_1	0.000008145613358618172	5.089076208073212	13293	255	207	19917	LSM8,SUPT4H1,MAGED4,SELENOT,BCKDHA,GOLGA4,INO80D,SAFB2,GOLGA3,ALMS1,SMG1,HDGFL2,SAFB,KCMF1,CCDC88B,KIAA0232,SLC38A10,FKBP2,GTF2A2,ZNF627,ZNF207,SREK1,SCYL1,N4BP2,ZBTB37,ANKRD36C,ATP5MG,NUMA1,NDUFS7,SNRPG,UPF1,ZNF652,RBM6,ZNF37A,NONO,NIPBL,RANBP2,ANKRD12,KRI1,KIF7,KIF3A,CSNK2A3,MMADHC,UBTF,MVD,RSF1,FKBP1A,CNIH4,GAK,KIAA1109,RIF1,CRTAP,LUC7L,GCC2,OLA1,CTNNBL1,PPIA,POLD1,CCDC137,NDUFC2,YWHAQ,MTX3,PN…
TF	Factor: E2F-3:TBR2; motif: ANGTGYKANGGCGCSTTNNCRNNT; match class: 1	TF:M08207_1	0.000008276545711079	5.0821508820110255	15626	255	231	19917	RPL41,UQCRHL,LSM8,SUPT4H1,MAGED4,SELENOT,BCKDHA,DMAC1,INO80D,SAFB2,CNIH1,GOLGA3,ALMS1,SMG1,HDGFL2,SAFB,KCMF1,POTEE,CCDC88B,KIAA0232,SLC38A10,FKBP2,GTF2A2,ZNF627,ZNF638,ZNF207,SREK1,SCYL1,N4BP2,ZBTB37,CEP250,LYPLA1,ANKRD36C,ATP5MG,NUMA1,NDUFS7,SNRPG,COX7C,UPF1,ZNF652,RBM6,ZNF37A,NONO,NIPBL,RANBP2,TCEAL3,ANKRD12,KRI1,KIF7,KIF3A,MMADHC,UBTF,MVD,RSF1,FKBP1A,GAK,RIF1,CRTAP,LUC7L,GCC2,OLA1,TCEAL4,CTNNB…
TF	Factor: Elf-1; motif: NNANCCGGAAGTGS	TF:M09900	0.000008362356835896652	5.077671304310794	5264	255	105	19917	RPL41,APOC2,SUPT4H1,BCKDHA,DMAC1,GOLGA4,GOLGA3,KCMF1,RPS14,CCDC88B,SLC38A10,FKBP2,GTF2A2,ZNF638,SREK1,ZBTB37,NUMA1,SNRPG,COX7C,NIPBL,MMADHC,FKBP1A,GAK,RIF1,GCC2,RPL23A,TIMM8B,CCDC137,MTX3,PNISR,PTRHD1,NASP,CHD2,PEX2,ELOC,ZNF221,CEP131,SURF6,PSMC5,RPL15,AXIN1,POLR2J3,SAMD8,ARFRP1,MOB1B,RER1,EIF3CL,CDK11B,ZNF707,DAPK3,DAZAP1,CCDC9,MINDY2,INTS1,C3ORF38,ARHGAP4,PSENEN,BMS1,PAXX,RPS3A,ZGPAT,WDR46,TIMM…
TF	Factor: ZF5; motif: NRNGNGCGCGCWN	TF:M00333	0.000008411829428688588	5.075109542325514	15217	255	227	19917	RPL41,LSM8,SUPT4H1,MAGED4,SELENOT,BCKDHA,GOLGA4,INO80D,SAFB2,CNIH1,GOLGA3,ALMS1,SMG1,HDGFL2,SAFB,KCMF1,POTEE,KIAA0232,SLC38A10,FKBP2,GTF2A2,ZNF638,SREK1,SCYL1,N4BP2,ZBTB37,CEP250,LYPLA1,ANKRD36C,ATP5MG,NUMA1,NDUFS7,SNRPG,COX7C,UPF1,ZNF652,RBM6,ZNF37A,NONO,NIPBL,RANBP2,TCEAL3,ANKRD12,KRI1,KIF7,KIF3A,CSNK2A3,MMADHC,UBTF,MVD,RSF1,FKBP1A,CNIH4,GAK,RIF1,CRTAP,LUC7L,GCC2,OLA1,TCEAL4,CTNNBL1,PPIA,RPL23A…
TF	Factor: AP-2gamma:Elk-1; motif: NGCCKNRGGSGRCGGAAGTG; match class: 1	TF:M08441_1	0.000008453945608601442	5.072940550682567	12848	255	202	19917	RPL41,APOC2,MAGED4,SELENOT,BCKDHA,DMAC1,SAFB2,GOLGA3,ALMS1,SMG1,HDGFL2,SAFB,KCMF1,POTEE,CCDC88B,KIAA0232,SLC38A10,FKBP2,GTF2A2,ZNF638,ZNF207,SREK1,SCYL1,N4BP2,ZBTB37,CEP250,LYPLA1,ANKRD36C,NUMA1,NDUFS7,SNRPG,COX7C,UPF1,ZNF652,RBM6,ZNF37A,NONO,NIPBL,RANBP2,TCEAL3,ANKRD12,KRI1,KIF7,KIF3A,MMADHC,UBTF,MVD,RSF1,FKBP1A,CNIH4,KIAA1109,RIF1,CRTAP,LUC7L,GCC2,OLA1,TCEAL4,PPIA,RPL23A,POLD1,TIMM8B,CCDC137,CO…
TF	Factor: Elk-1; motif: RCCGGAAGTGN	TF:M09904	0.000008453945608601442	5.072940550682567	8239	255	146	19917	RPL41,LSM8,APOC2,SUPT4H1,BCKDHA,DMAC1,GOLGA4,CNIH1,GOLGA3,ALMS1,HDGFL2,KCMF1,RPS14,CCDC88B,SLC38A10,FKBP2,GTF2A2,ZNF638,SREK1,SCYL1,N4BP2,ZBTB37,LYPLA1,ATP5MG,NUMA1,SNRPG,COX7C,UPF1,NIPBL,MMADHC,FKBP1A,GAK,KIAA1109,RIF1,GCC2,RPL23A,POLD1,TIMM8B,CCDC137,MTX3,PNISR,PTRHD1,NASP,CHD2,PEX2,ELOC,ZNF221,CEP131,NFKBIL1,PPP2CA,SURF6,EDF1,PSMC5,RPL15,AXIN1,UBXN7,POLR2J3,SAMD8,ARFRP1,MOB1B,RER1,EIF3CL,CDK11…
TF	Factor: nerf; motif: NRRNSCGGAAGNRNNNN; match class: 1	TF:M09606_1	0.000008513651356716222	5.0698841386261755	1718	255	48	19917	SUPT4H1,KCMF1,SLC38A10,FKBP2,GTF2A2,SREK1,SCYL1,N4BP2,SNRPG,UPF1,NIPBL,FKBP1A,GAK,GCC2,CCDC137,PNISR,NASP,PSMC5,AXIN1,ARFRP1,RER1,CDK11B,ZNF707,TBL3,BMS1,TAF10,RPS3A,ZGPAT,HNRNPLL,SUGP2,RNF2,ZNF646,ASB1,PPAN,DDX54,PTPN11,ATAD2B,ZNF721,STK19,TSR3,FUNDC2,DMAP1,USP34,SLX1A,ANTKMT,DPP8,SETD2,RPA3
TF	Factor: E2F1; motif: NNNNNGCGSSAAAN	TF:M08874	0.000008609082618835769	5.065043124365635	7267	255	133	19917	RPL41,SUPT4H1,SELENOT,INO80D,CNIH1,GOLGA3,HDGFL2,POTEE,KIAA0232,ZNF638,ZNF207,SREK1,SCYL1,N4BP2,CEP250,LYPLA1,ANKRD36C,ATP5MG,NUMA1,NDUFS7,COX7C,UPF1,ZNF37A,NIPBL,RANBP2,KRI1,KIF7,KIF3A,CSNK2A3,GAK,RIF1,LUC7L,GCC2,OLA1,PPIA,RPL23A,POLD1,CCDC137,COMMD4,YWHAQ,MTX3,METTL16,NASP,PEX2,MBD3,ELOC,CEP131,NFKBIL1,CNOT7,SURF6,RAN,EDF1,PURA,PSMC5,RPL15,UBXN7,POLR2J3,ARFRP1,RER1,EIF3CL,CDK11B,PELP1,DAZAP1,CC…
TF	Factor: c-Ets-2; motif: NCCGGAAGTG	TF:M08759	0.000008609082618835769	5.065043124365635	8396	255	148	19917	RPL41,LSM8,APOC2,SUPT4H1,MAGED4,BCKDHA,DMAC1,GOLGA4,CNIH1,GOLGA3,ALMS1,HDGFL2,KCMF1,RPS14,CCDC88B,SLC38A10,FKBP2,GTF2A2,ZNF638,SREK1,SCYL1,N4BP2,ZBTB37,LYPLA1,ATP5MG,NUMA1,SNRPG,COX7C,UPF1,NIPBL,MMADHC,FKBP1A,GAK,KIAA1109,RIF1,GCC2,RPL23A,POLD1,TIMM8B,CCDC137,MTX3,PNISR,PTRHD1,NASP,CHD2,PEX2,ELOC,ZNF221,CEP131,NFKBIL1,PPP2CA,SURF6,RAN,EDF1,PSMC5,RPL15,AXIN1,UBXN7,POLR2J3,SAMD8,ARFRP1,MOB1B,RER1,E…
TF	Factor: Elf-1; motif: NANGCGGAAGTR	TF:M11452	0.000008720238703732195	5.059471626730872	6324	255	120	19917	RPL41,APOC2,SUPT4H1,BCKDHA,DMAC1,GOLGA4,GOLGA3,HDGFL2,RPS14,CCDC88B,SLC38A10,FKBP2,GTF2A2,ZNF207,SREK1,ZBTB37,LYPLA1,ATP5MG,SNRPG,COX7C,NIPBL,MMADHC,FKBP1A,GAK,RIF1,GCC2,OLA1,CTNNBL1,PPIA,RPL23A,POLD1,TIMM8B,CCDC137,COMMD4,MTX3,PNISR,PTRHD1,NASP,PEX2,ELOC,ZNF221,CEP131,NFKBIL1,PPP2CA,RAN,PSMC5,RPL15,AXIN1,GRIPAP1,POLR2J3,SAMD8,ARFRP1,MOB1B,RER1,EIF3CL,CDK11B,ZNF707,DAPK3,CCDC9,MINDY2,INTS1,C3ORF3…
TF	Factor: CHD2; motif: TCTCGCGAG	TF:M04710	0.000008954895776321989	5.047939464424849	14245	255	217	19917	UQCRHL,LSM8,APOC2,SUPT4H1,MAGED4,SELENOT,BCKDHA,DMAC1,GOLGA4,INO80D,SAFB2,GOLGA3,ALMS1,SAFB,KCMF1,RPS14,CCDC88B,KIAA0232,SLC38A10,FKBP2,GTF2A2,ZNF627,ZNF638,ZNF207,SREK1,SCYL1,N4BP2,ZBTB37,CEP250,LYPLA1,ANKRD36C,ATP5MG,NUMA1,NDUFS7,SNRPG,COX7C,ZNF652,RBM6,ZNF37A,NONO,NIPBL,RANBP2,TCEAL3,ANKRD12,KIF7,KIF3A,CSNK2A3,UBTF,MVD,RSF1,CNIH4,GAK,RIF1,CRTAP,GCC2,OLA1,CTNNBL1,PPIA,RPL23A,POLD1,TIMM8B,CCDC13…
TF	Factor: PEA3; motif: NACCGGAAGTN	TF:M11425	0.00000916633791077478	5.037804136827228	7499	255	136	19917	RPL41,LSM8,APOC2,SUPT4H1,MAGED4,BCKDHA,DMAC1,GOLGA4,GOLGA3,ALMS1,HDGFL2,KCMF1,RPS14,CCDC88B,SLC38A10,FKBP2,GTF2A2,ZNF638,SREK1,SCYL1,N4BP2,ZBTB37,LYPLA1,ATP5MG,NUMA1,SNRPG,COX7C,UPF1,RBM6,NIPBL,MMADHC,FKBP1A,GAK,KIAA1109,RIF1,GCC2,RPL23A,POLD1,TIMM8B,CCDC137,MTX3,PNISR,PTRHD1,NASP,CHD2,PEX2,ELOC,ZNF221,CEP131,NFKBIL1,SURF6,PSMC5,AXIN1,UBXN7,POLR2J3,SAMD8,ARFRP1,MOB1B,RER1,EIF3CL,CDK11B,ZNF707,GOL…
TF	Factor: Elf-1; motif: NAANCMGGAAGTGN	TF:M09605	0.00000916633791077478	5.037804136827228	5835	255	113	19917	RPL41,SUPT4H1,MAGED4,GOLGA4,GOLGA3,ALMS1,KCMF1,RPS14,CCDC88B,SLC38A10,FKBP2,GTF2A2,ZNF638,SREK1,N4BP2,ZBTB37,NUMA1,SNRPG,COX7C,UPF1,NIPBL,MMADHC,FKBP1A,GAK,RIF1,GCC2,RPL23A,TIMM8B,CCDC137,MTX3,PNISR,PTRHD1,NASP,CHD2,PEX2,ZNF221,CEP131,SURF6,PSMC5,AXIN1,POLR2J3,SAMD8,ARFRP1,RER1,EIF3CL,CDK11B,ZNF707,GOLGB1,DAPK3,DAZAP1,CCDC9,MINDY2,EIF2S3B,INTS1,C3ORF38,ARHGAP4,PSENEN,BMS1,PAXX,RESF1,RPS3A,ZGPAT,W…
TF	Factor: PEA3; motif: NACCGGAAGTN; match class: 1	TF:M11430_1	0.00000960183309583305	5.017645847438786	4943	255	100	19917	APOC2,SUPT4H1,MAGED4,DMAC1,GOLGA4,INO80D,GOLGA3,ALMS1,KCMF1,RPS14,CCDC88B,SLC38A10,FKBP2,GTF2A2,SREK1,N4BP2,ZBTB37,LYPLA1,ATP5MG,SNRPG,COX7C,UPF1,NIPBL,FKBP1A,GAK,KIAA1109,RPL23A,CCDC137,NDUFC2,MTX3,PNISR,NASP,PEX2,ELOC,NFKBIL1,PPP2CA,SURF6,RAN,RRBP1,PSMC5,RPL15,AXIN1,SAMD8,ARFRP1,RER1,CDK11B,ZNF707,DAPK3,DAZAP1,INTS1,C3ORF38,TBL3,PSENEN,BMS1,PAXX,TAF10,RPS3A,ZGPAT,WDR46,TIMM13,UBE2D2,HNRNPLL,KIF…
TF	Factor: ZFX; motif: SNAGGCCNCR	TF:M10121	0.000010233187957482688	4.989989048921127	4020	255	86	19917	SELENOT,GOLGA4,INO80D,SAFB2,GOLGA3,SMG1,HDGFL2,SAFB,KCMF1,SLC38A10,GTF2A2,SCYL1,N4BP2,CEP250,ANKRD36C,NUMA1,NDUFS7,COX7C,UPF1,RBM6,ZNF37A,NIPBL,RANBP2,RSF1,FKBP1A,RIF1,CRTAP,OLA1,TCEAL4,POLD1,TIMM8B,COMMD4,PTRHD1,NASP,MBD3,CEP131,NFKBIL1,SURF6,EDF1,AXIN1,MOB1B,RER1,CDK11B,ZNF707,DAZAP1,RPL10A,MINDY2,INTS1,TBL3,PSENEN,EIF3A,RPS3A,WDR46,TIMM13,HNRNPLL,CFAP410,DNAJC5,AKAP13,ATP5F1E,CANX,EWSR1,GRINA,…
TF	Factor: sp4; motif: NNGNARGRGGCGGRGCNNRR	TF:M10072	0.000010740109229775277	4.968991301723294	10571	255	175	19917	SUPT4H1,MAGED4,DMAC1,GOLGA4,INO80D,SAFB2,GOLGA3,ALMS1,SMG1,HDGFL2,SAFB,KCMF1,POTEE,RPS14,CCDC88B,KIAA0232,SLC38A10,FKBP2,ZNF627,ZNF207,SREK1,SCYL1,N4BP2,ZBTB37,CEP250,LYPLA1,ANKRD36C,NUMA1,SNRPG,COX7C,ZNF652,RBM6,NONO,NIPBL,TCEAL3,ANKRD12,KRI1,KIF7,KIF3A,UBTF,MVD,RSF1,KIAA1109,RIF1,CRTAP,OLA1,TCEAL4,CTNNBL1,PPIA,POLD1,COMMD4,YWHAQ,MTX3,PNISR,PTRHD1,TTBK2,NASP,FAM50A,MBD3,ZNF221,RNF139,CEP131,NFKB…
TF	Factor: Elk-1:HOXA1; motif: ACCGGAAGTAATTA	TF:M08451	0.00001178395670927213	4.9287088616303585	8515	255	149	19917	RPL41,UQCRHL,APOC2,SUPT4H1,BCKDHA,DMAC1,GOLGA4,GOLGA3,HDGFL2,KCMF1,RPS14,CCDC88B,KIAA0232,SLC38A10,FKBP2,GTF2A2,ZNF207,SREK1,SCYL1,N4BP2,ZBTB37,LYPLA1,ATP5MG,NUMA1,SNRPG,COX7C,ZNF37A,NIPBL,TCEAL3,CSNK2A3,MMADHC,FKBP1A,GAK,KIAA1109,RIF1,LUC7L,GCC2,CTNNBL1,PPIA,RPL23A,POLD1,TIMM8B,CCDC137,COMMD4,MTX3,PNISR,PTRHD1,NASP,CHD2,PEX2,MBD3,ELOC,ZNF221,CEP131,NFKBIL1,PPP2CA,ANKS3,RRBP1,PSMC5,RPL15,AXIN1,SA…
TF	Factor: ATF-3; motif: GGCGCSSNSNGRTSACGTSA	TF:M04744	0.0000140104418593139	4.853548167780909	10196	255	170	19917	RPL41,UQCRHL,LSM8,APOC2,SELENOT,BCKDHA,INO80D,CNIH1,ALMS1,SMG1,SAFB,POTEE,CCDC88B,KIAA0232,SLC38A10,FKBP2,ZNF638,SREK1,SCYL1,ZBTB37,ANKRD36C,ATP5MG,NUMA1,NDUFS7,SNRPG,COX7C,UPF1,ZNF652,RBM6,NIPBL,RANBP2,TCEAL3,ANKRD12,KIF7,KIF3A,MMADHC,MVD,RSF1,CNIH4,GAK,KIAA1109,RIF1,GCC2,OLA1,TCEAL4,PPIA,RPL23A,TIMM8B,CCDC137,COMMD4,NDUFC2,YWHAQ,MTX3,PNISR,PTRHD1,TTBK2,NASP,FAM50A,ZNF221,RNF139,CEP131,PPP2CA,AN…
TF	Factor: E2F-1:DP-2; motif: TTTSSCGC	TF:M00737	0.000015592211023304434	4.807092296155924	8859	255	153	19917	RPL41,LSM8,APOC2,SUPT4H1,DMAC1,INO80D,GOLGA3,ALMS1,HDGFL2,KCMF1,POTEE,SLC38A10,FKBP2,ZNF627,ZNF638,SREK1,N4BP2,CEP250,ATP5MG,NUMA1,NDUFS7,COX7C,ZNF652,ZNF37A,NONO,NIPBL,RANBP2,ANKRD12,KRI1,KIF7,KIF3A,CSNK2A3,MMADHC,UBTF,GAK,RIF1,CRTAP,LUC7L,GCC2,OLA1,CTNNBL1,PPIA,RPL23A,POLD1,TIMM8B,CCDC137,COMMD4,NDUFC2,MTX3,PTRHD1,TTBK2,METTL16,NASP,PEX2,MBD3,ELOC,SREK1IP1,NFKBIL1,ANKS3,CNOT7,SURF6,EDF1,PURA,PS…
TF	Factor: ER81; motif: NNCCGGAWGYN; match class: 1	TF:M11419_1	0.00001640695550901407	4.784971999586925	1438	255	42	19917	SUPT4H1,GOLGA3,RPS14,FKBP2,GTF2A2,SREK1,N4BP2,ZBTB37,ATP5MG,SNRPG,COX7C,FKBP1A,GAK,RPL23A,CCDC137,NASP,PEX2,PSMC5,AXIN1,ARFRP1,RER1,ZNF707,INTS1,PSENEN,PAXX,TAF10,ZGPAT,WDR46,TIMM13,HNRNPLL,SSR3,ZNF646,ASB1,PPAN,STK19,HDAC4,CYTH2,FUNDC2,DMAP1,ANTKMT,SETD2,RPA3
TF	Factor: Elk-1; motif: NRCCGGAAGTN; match class: 1	TF:M11433_1	0.000018462257646229025	4.733715192619532	2281	255	57	19917	SUPT4H1,GOLGA3,HDGFL2,RPS14,FKBP2,GTF2A2,SREK1,N4BP2,ZBTB37,ATP5MG,SNRPG,COX7C,FKBP1A,GAK,GCC2,RPL23A,TIMM8B,CCDC137,NASP,PEX2,EDF1,PSMC5,AXIN1,ARFRP1,RER1,CDK11B,ZNF707,CCDC9,INTS1,PSENEN,EIF3A,PAXX,ZGPAT,WDR46,TIMM13,RAB8A,UBE2D2,HNRNPLL,SSR3,ZNF646,SLC25A5,EWSR1,ASB1,PPAN,ENGASE,STK19,LNPEP,CYTH2,FUNDC2,DMAP1,FAM199X,TBCA,ANTKMT,DPP8,SETD2,CAPZA1,RPA3
TF	Factor: Sp6; motif: WGGGCGG	TF:M05361	0.000018462257646229025	4.733715192619532	8651	255	150	19917	RPL41,SELENOT,GOLGA4,INO80D,SAFB2,CNIH1,GOLGA3,ALMS1,SMG1,HDGFL2,SAFB,KCMF1,KIAA0232,SLC38A10,FKBP2,GTF2A2,ZNF207,SCYL1,N4BP2,ZBTB37,CEP250,LYPLA1,ANKRD36C,RBM6,NONO,NIPBL,RANBP2,TCEAL3,ANKRD12,KRI1,KIF7,KIF3A,UBTF,MVD,RSF1,CNIH4,KIAA1109,RIF1,GCC2,OLA1,CTNNBL1,PPIA,TIMM8B,CCDC137,COMMD4,YWHAQ,PTRHD1,TTBK2,NASP,PEX2,FAM50A,MBD3,ELOC,ZNF221,RNF139,CEP131,NFKBIL1,PPP2CA,CNOT7,SURF6,EDF1,RRBP1,PURA,…
TF	Factor: CPBP; motif: NGGGCGG	TF:M05444	0.000018462257646229025	4.733715192619532	8651	255	150	19917	RPL41,SELENOT,GOLGA4,INO80D,SAFB2,CNIH1,GOLGA3,ALMS1,SMG1,HDGFL2,SAFB,KCMF1,KIAA0232,SLC38A10,FKBP2,GTF2A2,ZNF207,SCYL1,N4BP2,ZBTB37,CEP250,LYPLA1,ANKRD36C,RBM6,NONO,NIPBL,RANBP2,TCEAL3,ANKRD12,KRI1,KIF7,KIF3A,UBTF,MVD,RSF1,CNIH4,KIAA1109,RIF1,GCC2,OLA1,CTNNBL1,PPIA,TIMM8B,CCDC137,COMMD4,YWHAQ,PTRHD1,TTBK2,NASP,PEX2,FAM50A,MBD3,ELOC,ZNF221,RNF139,CEP131,NFKBIL1,PPP2CA,CNOT7,SURF6,EDF1,RRBP1,PURA,…
TF	Factor: GABP-alpha; motif: NACCGGAAGTN	TF:M11414	0.000018462257646229025	4.733715192619532	2938	255	68	19917	SUPT4H1,DMAC1,GOLGA3,RPS14,SLC38A10,FKBP2,GTF2A2,SREK1,N4BP2,ZBTB37,SNRPG,NIPBL,MMADHC,FKBP1A,GAK,RIF1,RPL23A,TIMM8B,CCDC137,MTX3,PNISR,NASP,PEX2,ZNF221,CEP131,AXIN1,UBXN7,ARFRP1,EIF3CL,ZNF707,DAPK3,CCDC9,MINDY2,INTS1,C3ORF38,PSENEN,PAXX,ZGPAT,WDR46,TIMM13,RAB8A,HNRNPLL,SSR3,ZNF646,SLC25A5,EWSR1,RBM15,DHX38,ASB1,PPAN,CMC4,HYPK,ZBTB17,ATAD2B,ZNF721,STK19,PAF1,TSR3,DMAP1,FAM199X,MAGEF1,ANTKMT,DPP8,…
TF	Factor: SAP-1; motif: NRNCGGAWRYN	TF:M11436	0.000018462257646229025	4.733715192619532	1445	255	42	19917	RPL41,APOC2,SUPT4H1,FKBP2,GTF2A2,N4BP2,SNRPG,NIPBL,FKBP1A,GAK,GCC2,RPL23A,POLD1,TIMM8B,CCDC137,PEX2,ZNF221,CEP131,RER1,DAPK3,CCDC9,MINDY2,C3ORF38,PSENEN,PAXX,HNRNPLL,ZNF646,UBXN1,DHX38,ASB1,PPAN,CMC4,STK19,PAF1,TSR3,DMAP1,SLX1A,MAGEF1,ANTKMT,DPP8,ZSWIM9,CREBZF
TF	Factor: Sp2; motif: WGGGCGG	TF:M05332	0.000018462257646229025	4.733715192619532	8651	255	150	19917	RPL41,SELENOT,GOLGA4,INO80D,SAFB2,CNIH1,GOLGA3,ALMS1,SMG1,HDGFL2,SAFB,KCMF1,KIAA0232,SLC38A10,FKBP2,GTF2A2,ZNF207,SCYL1,N4BP2,ZBTB37,CEP250,LYPLA1,ANKRD36C,RBM6,NONO,NIPBL,RANBP2,TCEAL3,ANKRD12,KRI1,KIF7,KIF3A,UBTF,MVD,RSF1,CNIH4,KIAA1109,RIF1,GCC2,OLA1,CTNNBL1,PPIA,TIMM8B,CCDC137,COMMD4,YWHAQ,PTRHD1,TTBK2,NASP,PEX2,FAM50A,MBD3,ELOC,ZNF221,RNF139,CEP131,NFKBIL1,PPP2CA,CNOT7,SURF6,EDF1,RRBP1,PURA,…
TF	Factor: Elf-1; motif: NANGCGGAAGTN; match class: 1	TF:M11448_1	0.000018802111083817848	4.725793385811827	2341	255	58	19917	RPL41,GOLGA4,GOLGA3,RPS14,KIAA0232,SLC38A10,FKBP2,GTF2A2,SREK1,LYPLA1,COX7C,NIPBL,GAK,CRTAP,GCC2,OLA1,PPIA,CCDC137,COMMD4,PEX2,ELOC,CEP131,NFKBIL1,PSMC5,AXIN1,GRIPAP1,ARFRP1,RER1,CDK11B,ZNF707,DAZAP1,CCDC9,INTS1,C3ORF38,TBL3,PSENEN,BMS1,PAXX,TAF10,ZGPAT,WDR46,RNF2,ZNF646,ATP5F1E,UBXN1,DHX38,PRAME,ASB1,HYPK,ATAD2B,ZNF721,THRAP3,DMAP1,SLX1A,ANTKMT,DPP8,ZSWIM9,RPA3
TF	Factor: Net; motif: NRCCGGAAGTN	TF:M11439	0.000019383932176021676	4.712558118455314	2580	255	62	19917	SUPT4H1,GOLGA3,RPS14,SLC38A10,FKBP2,GTF2A2,SREK1,N4BP2,ZBTB37,SNRPG,NIPBL,FKBP1A,GAK,RPL23A,TIMM8B,MTX3,PNISR,NASP,PEX2,ZNF221,CEP131,SURF6,AXIN1,ARFRP1,RER1,EIF3CL,ZNF707,DAPK3,CCDC9,MINDY2,INTS1,C3ORF38,PSENEN,PAXX,ZGPAT,WDR46,TIMM13,RAB8A,HNRNPLL,SSR3,ZNF646,SLC25A5,RBM15,DHX38,ASB1,PPAN,CMC4,HYPK,ZBTB17,ATAD2B,ZNF721,STK19,PAF1,TSR3,DMAP1,MAGEF1,ANTKMT,DPP8,ZSWIM9,KCNS3,CREBZF,RPA3
TF	Factor: MAZ; motif: GGGMGGGGSSGGGGGGGGGGGG	TF:M09636	0.000020461602258197695	4.689060361599001	16380	255	237	19917	RPL41,UQCRHL,LSM8,APOC2,SUPT4H1,MAGED4,BCKDHA,DMAC1,GOLGA4,INO80D,SAFB2,CNIH1,GOLGA3,ALMS1,SMG1,HDGFL2,SAFB,KCMF1,POTEE,RPS14,CCDC88B,KIAA0232,SLC38A10,FKBP2,GTF2A2,ZNF627,ZNF638,ZNF207,SREK1,SCYL1,N4BP2,ZBTB37,CEP250,LYPLA1,ANKRD36C,NUMA1,NDUFS7,SNRPG,COX7C,UPF1,ZNF652,RBM6,ZNF37A,NONO,NIPBL,RANBP2,TCEAL3,ANKRD12,KRI1,KIF7,KIF3A,CSNK2A3,MMADHC,UBTF,MVD,RSF1,FKBP1A,CNIH4,GAK,KIAA1109,RIF1,CRTAP,L…
TF	Factor: E2F; motif: TTTSGCGS	TF:M00426	0.000021698970192758835	4.663560876760449	12013	255	191	19917	RPL41,LSM8,APOC2,MAGED4,SELENOT,BCKDHA,DMAC1,GOLGA4,INO80D,SAFB2,GOLGA3,SMG1,HDGFL2,SAFB,KCMF1,POTEE,RPS14,CCDC88B,KIAA0232,SLC38A10,FKBP2,ZNF638,ZNF207,SREK1,N4BP2,ZBTB37,CEP250,LYPLA1,ATP5MG,NUMA1,NDUFS7,COX7C,UPF1,ZNF652,ZNF37A,NIPBL,RANBP2,TCEAL3,ANKRD12,KRI1,KIF7,MMADHC,RSF1,CNIH4,GAK,KIAA1109,RIF1,CRTAP,LUC7L,GCC2,OLA1,PPIA,RPL23A,POLD1,TIMM8B,CCDC137,COMMD4,YWHAQ,MTX3,PNISR,TTC3,PTRHD1,TTB…
TF	Factor: Elk-1; motif: RACCGGAAGTR	TF:M01165	0.000025329471636257332	4.596373869342936	7853	255	139	19917	RPL41,APOC2,SUPT4H1,MAGED4,BCKDHA,DMAC1,GOLGA4,GOLGA3,HDGFL2,KCMF1,RPS14,CCDC88B,SLC38A10,FKBP2,GTF2A2,SREK1,N4BP2,ZBTB37,LYPLA1,ATP5MG,NUMA1,NDUFS7,SNRPG,COX7C,RBM6,NIPBL,KRI1,MMADHC,UBTF,FKBP1A,GAK,RIF1,GCC2,RPL23A,POLD1,TIMM8B,CCDC137,COMMD4,YWHAQ,MTX3,PNISR,TTBK2,NASP,CHD2,PEX2,MBD3,ELOC,ZNF221,SREK1IP1,CEP131,NFKBIL1,EDF1,PURA,PSMC5,AXIN1,GRIPAP1,UBXN7,POLR2J3,SAMD8,HTATSF1,ARFRP1,RER1,EIF3C…
TF	Factor: E2F-3; motif: GGCGGGN	TF:M02089	0.000025937007441238163	4.586080133368736	13271	255	205	19917	RPL41,SUPT4H1,MAGED4,SELENOT,DMAC1,GOLGA4,INO80D,SAFB2,GOLGA3,ALMS1,SMG1,HDGFL2,SAFB,KCMF1,POTEE,CCDC88B,KIAA0232,SLC38A10,FKBP2,GTF2A2,ZNF627,ZNF638,SCYL1,N4BP2,ZBTB37,CEP250,LYPLA1,ANKRD36C,NUMA1,NDUFS7,COX7C,ZNF652,RBM6,ZNF37A,NONO,NIPBL,RANBP2,TCEAL3,ANKRD12,KRI1,KIF7,KIF3A,CSNK2A3,UBTF,MVD,RSF1,KIAA1109,RIF1,CRTAP,LUC7L,GCC2,OLA1,TCEAL4,CTNNBL1,PPIA,POLD1,CCDC137,COMMD4,NDUFC2,YWHAQ,MTX3,PNI…
TF	Factor: TCF-1; motif: ACATCGRGRCGCTGW	TF:M11603	0.000025937007441238163	4.586080133368736	16517	255	238	19917	RPL41,UQCRHL,LSM8,APOC2,SUPT4H1,MAGED4,SELENOT,BCKDHA,DMAC1,GOLGA4,INO80D,SAFB2,CNIH1,GOLGA3,ALMS1,SMG1,HDGFL2,SAFB,KCMF1,POTEE,RPS14,CCDC88B,KIAA0232,SLC38A10,FKBP2,GTF2A2,ZNF627,ZNF638,ZNF207,SREK1,SCYL1,N4BP2,ZBTB37,CEP250,LYPLA1,ANKRD36C,ATP5MG,NUMA1,NDUFS7,SNRPG,COX7C,UPF1,ZNF652,RBM6,ZNF37A,NONO,NIPBL,RANBP2,TCEAL3,ANKRD12,KRI1,KIF7,KIF3A,CSNK2A3,MMADHC,UBTF,MVD,RSF1,FKBP1A,CNIH4,GAK,KIAA11…
TF	Factor: TCF-1; motif: ACATCGRGRCGCTGW	TF:M11601	0.00002631690309975418	4.579765218622696	14964	255	223	19917	UQCRHL,LSM8,APOC2,SUPT4H1,MAGED4,SELENOT,BCKDHA,DMAC1,GOLGA4,INO80D,SAFB2,CNIH1,GOLGA3,ALMS1,SMG1,HDGFL2,SAFB,KCMF1,POTEE,CCDC88B,KIAA0232,SLC38A10,FKBP2,GTF2A2,ZNF627,ZNF638,ZNF207,SREK1,SCYL1,N4BP2,ZBTB37,CEP250,ANKRD36C,ATP5MG,NUMA1,NDUFS7,SNRPG,COX7C,UPF1,ZNF652,RBM6,ZNF37A,NONO,NIPBL,RANBP2,TCEAL3,ANKRD12,KRI1,KIF7,KIF3A,CSNK2A3,MMADHC,UBTF,MVD,RSF1,FKBP1A,CNIH4,GAK,KIAA1109,RIF1,CRTAP,LUC7L…
TF	Factor: E2F-1:HES-7; motif: GGCRCGTGSYNNWNGGCGCSM	TF:M08525	0.000029680323603257865	4.527531368273635	17224	255	244	19917	RPL41,UQCRHL,LSM8,SUPT4H1,MAGED4,SELENOT,BCKDHA,DMAC1,GOLGA4,INO80D,SAFB2,CNIH1,GOLGA3,ALMS1,SMG1,HDGFL2,SAFB,KCMF1,POTEE,CCDC88B,KIAA0232,SLC38A10,FKBP2,GTF2A2,ZNF627,ZNF638,ZNF207,SREK1,SCYL1,N4BP2,ZBTB37,CEP250,LYPLA1,ANKRD36C,ATP5MG,NUMA1,NDUFS7,SNRPG,COX7C,UPF1,ZNF652,RBM6,ZNF37A,NONO,NIPBL,RANBP2,TCEAL3,ANKRD12,KRI1,KIF7,KIF3A,CSNK2A3,MMADHC,UBTF,MVD,RSF1,FKBP1A,CNIH4,GAK,KIAA1109,RIF1,CRTA…
TF	Factor: Elf-1; motif: NNANCCGGAAGTGS; match class: 1	TF:M09900_1	0.000029680323603257865	4.527531368273635	1163	255	36	19917	SUPT4H1,GOLGA3,RPS14,SLC38A10,FKBP2,GTF2A2,NIPBL,GAK,CCDC137,PNISR,NASP,PSMC5,AXIN1,POLR2J3,ARFRP1,RER1,CDK11B,DAZAP1,ARHGAP4,PAXX,ZGPAT,WDR46,TIMM13,SUGP2,ZNF646,ASB1,PPAN,PTPN11,ATAD2B,C6ORF47,ARHGAP45,DMAP1,ANTKMT,DPP8,SETD2,RPA3
TF	Factor: E2F; motif: NNTTTCGCGCN	TF:M08875	0.000029779837850529896	4.526077671285382	6260	255	117	19917	RPL41,SELENOT,INO80D,CNIH1,GOLGA3,POTEE,RPS14,ZNF627,ZNF638,ZNF207,SREK1,SCYL1,N4BP2,CEP250,LYPLA1,ANKRD36C,ATP5MG,NUMA1,NDUFS7,COX7C,UPF1,ZNF37A,NIPBL,RANBP2,KIF7,CNIH4,GAK,RIF1,LUC7L,GCC2,OLA1,PPIA,RPL23A,POLD1,CCDC137,YWHAQ,MTX3,METTL16,NASP,PEX2,CEP131,NFKBIL1,SURF6,RAN,PURA,PSMC5,RPL15,POLR2J3,ARFRP1,EIF3CL,CDK11B,PELP1,DAZAP1,CCDC9,RPL10A,TELO2,EIF2S3B,INTS1,C3ORF38,ARHGEF18,PSENEN,EIF3A,BM…
TF	Factor: E2F-3:TBR2; motif: ANGTGYKANGGCGCSTTNNCRNNT	TF:M08207	0.000029779837850529896	4.526077671285382	17225	255	244	19917	RPL41,UQCRHL,LSM8,SUPT4H1,MAGED4,SELENOT,BCKDHA,DMAC1,GOLGA4,INO80D,SAFB2,CNIH1,GOLGA3,ALMS1,SMG1,HDGFL2,SAFB,KCMF1,POTEE,CCDC88B,KIAA0232,SLC38A10,FKBP2,GTF2A2,ZNF627,ZNF638,ZNF207,SREK1,SCYL1,N4BP2,ZBTB37,CEP250,LYPLA1,ANKRD36C,ATP5MG,NUMA1,NDUFS7,SNRPG,COX7C,UPF1,ZNF652,RBM6,ZNF37A,NONO,NIPBL,RANBP2,TCEAL3,ANKRD12,KRI1,KIF7,KIF3A,MMADHC,UBTF,MVD,RSF1,FKBP1A,CNIH4,GAK,KIAA1109,RIF1,CRTAP,LUC7L,…
TF	Factor: GABP; motif: CACTTCCGGNNN	TF:M01258	0.00003007332761081981	4.521818514597839	2860	255	66	19917	SUPT4H1,GOLGA3,KCMF1,RPS14,SLC38A10,FKBP2,GTF2A2,SREK1,ZBTB37,NUMA1,NIPBL,MMADHC,GAK,RIF1,RPL23A,TIMM8B,MTX3,PNISR,NASP,PEX2,ZNF221,CEP131,SURF6,AXIN1,ARFRP1,RER1,EIF3CL,DAPK3,CCDC9,MINDY2,INTS1,C3ORF38,PSENEN,PAXX,ZGPAT,WDR46,TIMM13,RAB8A,CFAP410,SUGP2,SSR3,ZNF646,RBM15,ASB1,PPAN,DDX54,CMC4,HYPK,ZBTB17,ATAD2B,ZNF721,STK19,HDAC4,PAF1,TSR3,DMAP1,USP34,MAGEF1,RSRC2,ANTKMT,DPP8,ZSWIM9,KCNS3,SETD2,CR…
TF	Factor: ELK3; motif: ACCGGAAGTN	TF:M03972	0.00003025404798819178	4.519216508571252	1216	255	37	19917	SUPT4H1,FKBP2,GTF2A2,NIPBL,GAK,RPL23A,TIMM8B,NASP,PEX2,ZNF221,CEP131,AXIN1,ARFRP1,DAPK3,CCDC9,MINDY2,C3ORF38,PSENEN,ZGPAT,WDR46,TIMM13,ZNF646,RBM15,ASB1,PPAN,CMC4,HYPK,ZBTB17,PAF1,TSR3,DMAP1,MAGEF1,ANTKMT,DPP8,ZSWIM9,CREBZF,RPA3
TF	Factor: Erm; motif: ACCGGAAGTN; match class: 1	TF:M02069_1	0.000030333968168785688	4.518070773300256	1975	255	51	19917	SUPT4H1,GOLGA3,ALMS1,KCMF1,RPS14,SLC38A10,FKBP2,GTF2A2,SREK1,N4BP2,ZBTB37,LYPLA1,SNRPG,COX7C,FKBP1A,GAK,RPL23A,MTX3,PNISR,NASP,PEX2,AXIN1,SAMD8,ARFRP1,RER1,ZNF707,INTS1,PAXX,ZGPAT,WDR46,TIMM13,SUGP2,DNAJC5,SSR3,ZNF646,EWSR1,ASB1,PPAN,DDX54,ATAD2B,STK19,CYTH2,FUNDC2,DAZ1,DMAP1,ANTKMT,DPP8,PPP1R26,SETD2,CREBZF,RPA3
TF	Factor: YY1; motif: NNCGCCATTNN; match class: 1	TF:M03924_1	0.00003086931286191375	4.510473037625145	3744	255	80	19917	RPL41,MAGED4,SELENOT,BCKDHA,SAFB2,CNIH1,HDGFL2,SAFB,CEP250,NUMA1,SNRPG,COX7C,NONO,FKBP1A,GAK,LUC7L,TCEAL4,PPIA,RPL23A,TIMM8B,CCDC137,YWHAQ,PNISR,PTRHD1,METTL16,CHD2,ZNF221,RNF139,NFKBIL1,PPP2CA,CNOT7,SURF6,RAN,RRBP1,PSMC5,GRIPAP1,UBXN7,POLR2J3,SAMD8,HTATSF1,RER1,EIF3CL,PELP1,CCDC9,TELO2,TBL3,EIF3A,UBN2,RPS3A,WDR46,CASP8AP2,SDHAF4,RAB8A,BDP1,UBE2D2,HNRNPLL,KIF5B,DNAJC5,SSR3,RNF2,ATRAID,UBXN1,DHX38…
TF	Factor: ER71:Pax-5; motif: ACCGGAACYACGCWTSANTG	TF:M08266	0.000030888258433165736	4.510206577751908	14504	255	218	19917	RPL41,LSM8,APOC2,SUPT4H1,MAGED4,SELENOT,BCKDHA,DMAC1,GOLGA4,INO80D,SAFB2,CNIH1,GOLGA3,ALMS1,SMG1,HDGFL2,SAFB,KCMF1,POTEE,RPS14,CCDC88B,KIAA0232,SLC38A10,FKBP2,GTF2A2,ZNF627,SREK1,SCYL1,N4BP2,ZBTB37,CEP250,LYPLA1,ANKRD36C,ATP5MG,NUMA1,NDUFS7,SNRPG,COX7C,UPF1,RBM6,ZNF37A,NIPBL,RANBP2,TCEAL3,ANKRD12,KRI1,KIF7,KIF3A,MMADHC,UBTF,RSF1,FKBP1A,CNIH4,GAK,KIAA1109,RIF1,CRTAP,LUC7L,GCC2,OLA1,CTNNBL1,PPIA,RP…
TF	Factor: ER81; motif: NACCGGAAGTN	TF:M11420	0.000032770123215708815	4.484521925666699	3241	255	72	19917	SUPT4H1,DMAC1,GOLGA3,HDGFL2,RPS14,SLC38A10,FKBP2,GTF2A2,SREK1,N4BP2,ZBTB37,SNRPG,NIPBL,MMADHC,FKBP1A,GAK,RIF1,RPL23A,TIMM8B,CCDC137,MTX3,PNISR,NASP,CHD2,PEX2,ZNF221,CEP131,NFKBIL1,AXIN1,UBXN7,ARFRP1,EIF3CL,CDK11B,GOLGB1,DAPK3,CCDC9,MINDY2,INTS1,C3ORF38,PSENEN,PAXX,ZGPAT,WDR46,TIMM13,RAB8A,HNRNPLL,SSR3,ZNF646,CANX,EWSR1,RBM15,DHX38,ASB1,PPAN,CMC4,HYPK,ZBTB17,ATAD2B,ZNF721,STK19,PAF1,TSR3,DMAP1,FAM…
TF	Factor: ELK4; motif: NCRCTTCCGGN	TF:M07209	0.00003653447754208368	4.43729709886242	1125	255	35	19917	SUPT4H1,SLC38A10,FKBP2,GTF2A2,ZBTB37,NIPBL,RPL23A,TIMM8B,NASP,PEX2,ZNF221,CEP131,AXIN1,ARFRP1,EIF3CL,DAPK3,CCDC9,MINDY2,C3ORF38,ZGPAT,TIMM13,ZNF646,ASB1,PPAN,CMC4,HYPK,ZBTB17,PAF1,TSR3,DMAP1,MAGEF1,ANTKMT,DPP8,ZSWIM9,RPA3
TF	Factor: MOVO-B; motif: GNGGGGG	TF:M01104	0.000037277973766406995	4.428547701628776	10336	255	170	19917	SUPT4H1,MAGED4,DMAC1,GOLGA4,INO80D,SAFB2,GOLGA3,ALMS1,SMG1,HDGFL2,SAFB,KCMF1,POTEE,KIAA0232,SLC38A10,FKBP2,ZNF627,ZNF638,N4BP2,ZBTB37,CEP250,LYPLA1,ANKRD36C,COX7C,UPF1,ZNF652,NONO,NIPBL,RANBP2,TCEAL3,ANKRD12,KIF7,KIF3A,CSNK2A3,UBTF,MVD,RSF1,KIAA1109,RIF1,LUC7L,GCC2,PPIA,POLD1,CCDC137,COMMD4,NDUFC2,YWHAQ,MTX3,PNISR,PTRHD1,TTBK2,METTL16,NASP,FAM50A,MBD3,ELOC,RNF139,CEP131,NFKBIL1,PPP2CA,RAN,EDF1,RR…
TF	Factor: ETF; motif: GVGGMGG	TF:M00695	0.000037277973766406995	4.428547701628776	10500	255	172	19917	LSM8,SUPT4H1,SELENOT,DMAC1,GOLGA4,INO80D,SAFB2,CNIH1,GOLGA3,ALMS1,SMG1,HDGFL2,SAFB,KCMF1,CCDC88B,KIAA0232,SLC38A10,FKBP2,GTF2A2,ZNF627,ZNF638,SREK1,SCYL1,N4BP2,ZBTB37,LYPLA1,ANKRD36C,NDUFS7,UPF1,ZNF652,RBM6,NONO,NIPBL,RANBP2,ANKRD12,KIF7,MMADHC,UBTF,MVD,RSF1,FKBP1A,CNIH4,GAK,KIAA1109,RIF1,CRTAP,LUC7L,GCC2,OLA1,TCEAL4,CTNNBL1,PPIA,CCDC137,YWHAQ,PTRHD1,TTBK2,METTL16,NASP,FAM50A,MBD3,ELOC,ZNF221,RNF…
TF	Factor: Erg; motif: NNACCGGAARTSN; match class: 1	TF:M09608_1	0.000037277973766406995	4.428547701628776	2398	255	58	19917	APOC2,SUPT4H1,INO80D,GOLGA3,HDGFL2,RPS14,FKBP2,GTF2A2,N4BP2,ATP5MG,SNRPG,COX7C,TCEAL3,ANKRD12,GCC2,PPIA,RPL23A,TIMM8B,CCDC137,COMMD4,MTX3,PNISR,TTBK2,NASP,PEX2,ZNF221,PSMC5,RPL15,HTATSF1,RER1,CDK11B,ZNF707,GOLGB1,CCDC9,INTS1,PSENEN,EIF3A,PAXX,TAF10,WDR46,HNRNPLL,OSER1,ZNF646,UBXN1,DHX38,ASB1,ZBTB17,PAF1,LNPEP,THRAP3,FLYWCH2,DMAP1,FCHSD2,FAM199X,MAGEF1,SETD2,CAPZA1,RPA3
TF	Factor: ELF1; motif: AACCCGGAAGTR	TF:M03966	0.00004058649688411689	4.391618432041984	6662	255	122	19917	RPL41,SUPT4H1,SELENOT,BCKDHA,DMAC1,GOLGA4,GOLGA3,RPS14,CCDC88B,SLC38A10,FKBP2,GTF2A2,SREK1,ZBTB37,ATP5MG,SNRPG,COX7C,RBM6,NONO,NIPBL,TCEAL3,KRI1,MMADHC,GAK,RIF1,GCC2,RPL23A,POLD1,TIMM8B,CCDC137,MTX3,PNISR,TTC3,PTRHD1,METTL16,NASP,PEX2,ELOC,ZNF221,CEP131,NFKBIL1,ANKS3,EDF1,PSMC5,AXIN1,POLR2J3,SAMD8,ARFRP1,RER1,EIF3CL,CDK11B,ZNF707,DAPK3,DAZAP1,CCDC9,TELO2,RGS12,MINDY2,INTS1,C3ORF38,ARHGEF18,ARHGAP…
TF	Factor: YY1; motif: CAANATGGCGGC	TF:M10436	0.00004058649688411689	4.391618432041984	8301	255	144	19917	RPL41,SELENOT,BCKDHA,GOLGA4,SAFB2,SAFB,FKBP2,ZNF638,ZNF207,SREK1,N4BP2,CEP250,LYPLA1,ANKRD36C,ATP5MG,NDUFS7,COX7C,UPF1,NONO,RANBP2,ANKRD12,KRI1,KIF3A,CSNK2A3,MMADHC,UBTF,RSF1,FKBP1A,GAK,RIF1,TCEAL4,PPIA,RPL23A,TIMM8B,CCDC137,MTX3,PNISR,PTRHD1,TTBK2,METTL16,NASP,CHD2,FAM50A,SREK1IP1,RNF139,PPP2CA,CNOT7,SURF6,RAN,EDF1,RRBP1,PSMC5,RPL15,AXIN1,UBXN7,POLR2J3,HTATSF1,RER1,EIF3CL,PELP1,GOLGB1,DAPK3,MACF…
TF	Factor: Elk-1; motif: AACCGGAAGTR	TF:M01163	0.000044884308820711644	4.3479054581860535	5326	255	103	19917	RPL41,APOC2,SUPT4H1,DMAC1,GOLGA3,HDGFL2,RPS14,SLC38A10,FKBP2,GTF2A2,SREK1,N4BP2,ZBTB37,ATP5MG,SNRPG,RBM6,NIPBL,KRI1,MMADHC,FKBP1A,GAK,RIF1,GCC2,RPL23A,POLD1,TIMM8B,CCDC137,COMMD4,MTX3,PNISR,TTBK2,NASP,CHD2,PEX2,MBD3,ELOC,ZNF221,CEP131,NFKBIL1,EDF1,PSMC5,AXIN1,UBXN7,POLR2J3,SAMD8,ARFRP1,RER1,EIF3CL,CDK11B,ZNF707,GOLGB1,DAPK3,CCDC9,TELO2,MINDY2,INTS1,C3ORF38,TBL3,PSENEN,EIF3A,PAXX,ZGPAT,WDR46,TIMM1…
TF	Factor: etv3; motif: ACCGGAAGYN; match class: 1	TF:M02068_1	0.00004501244582201335	4.346667388346897	614	255	24	19917	SUPT4H1,RPS14,FKBP2,GTF2A2,SREK1,SNRPG,GAK,CCDC137,ELOC,PSMC5,AXIN1,RER1,ZNF707,PSENEN,TAF10,WDR46,TIMM13,HNRNPLL,ZNF646,ASB1,PPAN,DMAP1,DPP8,RPA3
TF	Factor: ER81; motif: NNCCGGAAGYG	TF:M09913	0.00004604108166371487	4.33685448184797	2900	255	66	19917	SUPT4H1,RPS14,SLC38A10,FKBP2,GTF2A2,SREK1,N4BP2,ZBTB37,NUMA1,SNRPG,NIPBL,MMADHC,FKBP1A,GAK,RPL23A,NASP,PEX2,ZNF221,CEP131,SURF6,AXIN1,ARFRP1,RER1,EIF3CL,ZNF707,DAPK3,CCDC9,MINDY2,C3ORF38,ARHGAP4,PSENEN,ZGPAT,TIMM13,HNRNPLL,CFAP410,SUGP2,ZNF646,SLC25A5,RBM15,DHX38,ASB1,PPAN,DDX54,CMC4,HYPK,ZBTB17,PTPN11,ATAD2B,ZNF721,STK19,HDAC4,PAF1,TSR3,C6ORF47,DMAP1,USP34,TBCA,MAGEF1,RSRC2,ANTKMT,DPP8,ZSWIM9,KC…
TF	Factor: E2F-1; motif: NGGGCGGGARV; match class: 1	TF:M07206_1	0.00004799088077788576	4.318841279376489	10947	255	177	19917	RPL41,LSM8,SUPT4H1,MAGED4,INO80D,SAFB2,GOLGA3,ALMS1,SMG1,HDGFL2,SAFB,KCMF1,POTEE,KIAA0232,SLC38A10,FKBP2,GTF2A2,ZNF627,ZNF638,ZNF207,SREK1,SCYL1,N4BP2,ZBTB37,CEP250,ANKRD36C,ATP5MG,NUMA1,NDUFS7,SNRPG,UPF1,ZNF652,RBM6,ZNF37A,NIPBL,ANKRD12,KRI1,KIF7,KIF3A,UBTF,MVD,RSF1,GAK,KIAA1109,RIF1,CRTAP,LUC7L,OLA1,PPIA,POLD1,CCDC137,COMMD4,YWHAQ,PNISR,PTRHD1,TTBK2,NASP,FAM50A,MBD3,ELOC,CEP131,NFKBIL1,PPP2CA,C…
TF	Factor: Elk-1:HOXA1; motif: ACCGGAAGTAATTA; match class: 1	TF:M08451_1	0.00004846814903182882	4.314543565394061	2600	255	61	19917	APOC2,SUPT4H1,GOLGA4,GOLGA3,RPS14,SLC38A10,FKBP2,GTF2A2,ZBTB37,ATP5MG,NUMA1,SNRPG,COX7C,NIPBL,MMADHC,FKBP1A,GAK,KIAA1109,LUC7L,CCDC137,COMMD4,PNISR,PTRHD1,NASP,PEX2,MBD3,ELOC,CEP131,NFKBIL1,RPL15,AXIN1,SAMD8,RER1,ZNF707,INTS1,C3ORF38,PSENEN,BMS1,RPS3A,WDR46,SSR3,TLR1,SNRNP70,ZNF646,SLC25A5,DHX38,ASB1,PPAN,HYPK,ATAD2B,STK19,C6ORF47,DAZ1,DMAP1,SLX1A,TBCA,ANTKMT,PPP1R26,SETD2,CAPZA1,RPA3
TF	Factor: GABP-ALPHA; motif: RCCGGAARTNN	TF:M08917	0.000049957621612572996	4.30139824574071	2724	255	63	19917	RPL41,APOC2,SUPT4H1,CNIH1,GOLGA3,RPS14,SLC38A10,FKBP2,GTF2A2,N4BP2,ZBTB37,SNRPG,NIPBL,FKBP1A,GAK,RPL23A,POLD1,TIMM8B,MTX3,PNISR,NASP,PEX2,ELOC,ZNF221,CEP131,PSMC5,AXIN1,ARFRP1,EIF3CL,DAPK3,CCDC9,MINDY2,INTS1,C3ORF38,PSENEN,PAXX,ZGPAT,WDR46,TIMM13,HNRNPLL,DNAJC5,SSR3,ZNF646,RBM15,DHX38,ASB1,PPAN,CMC4,HYPK,ZBTB17,STK19,PAF1,TSR3,DMAP1,FCHSD2,FAM199X,SLX1A,MAGEF1,ANTKMT,DPP8,ZSWIM9,CREBZF,RPA3
TF	Factor: ETV6; motif: NSCGGAAGTR	TF:M03985	0.00005463339103314169	4.262541842478721	1148	255	35	19917	RPL41,APOC2,BCKDHA,GOLGA3,SLC38A10,ATP5MG,NIPBL,GCC2,POLD1,CCDC137,PTRHD1,ELOC,ZNF221,PPP2CA,PSMC5,RPL15,MOB1B,RER1,ZNF707,CCDC9,C3ORF38,UBN2,BMS1,RPS3A,ZNF646,UBXN1,CMC4,ZNF721,TSR3,DMAP1,SLX1A,ANTKMT,DPP8,ZSWIM9,CCZ1B
TF	Factor: YY1; motif: CAANATGGCGGC; match class: 1	TF:M10436_1	0.00005562973360258293	4.254693019786032	2313	255	56	19917	SAFB2,SAFB,ZNF207,NDUFS7,COX7C,NONO,KIF3A,CSNK2A3,RSF1,TCEAL4,PPIA,TIMM8B,CCDC137,PNISR,PTRHD1,NASP,RNF139,PPP2CA,RAN,RRBP1,RPL15,UBXN7,HTATSF1,RER1,EIF3CL,PELP1,TELO2,CYTH1,ARHGAP4,TBL3,EIF3A,UBN2,WDR46,HNRNPLL,CFAP410,KIF5B,ATRAID,IGIP,UBXN1,DHX38,SSB,PRAME,DDX54,HYPK,ATAD2B,PAF1,TSR3,CLK1,DAZ1,USP34,CKLF,TBCA,MAGEF1,RSRC2,CAPZA1,MORC2
TF	Factor: pax-6; motif: NYACGCNTSRNYGCNYN; match class: 1	TF:M11883_1	0.0000607297372336441	4.216598597985378	7825	255	137	19917	RPL41,BCKDHA,DMAC1,SAFB2,GOLGA3,ALMS1,SMG1,SAFB,POTEE,CCDC88B,GTF2A2,ZNF627,ZNF638,SREK1,SCYL1,N4BP2,CEP250,LYPLA1,ANKRD36C,ATP5MG,NUMA1,NDUFS7,SNRPG,UPF1,RBM6,NONO,NIPBL,RANBP2,ANKRD12,KRI1,KIF3A,MMADHC,MVD,CNIH4,GAK,CRTAP,LUC7L,OLA1,CTNNBL1,PPIA,RPL23A,CCDC137,NDUFC2,YWHAQ,NASP,ELOC,ZNF221,RNF139,CEP131,PPP2CA,CNOT7,SURF6,PURA,AXIN1,UBXN7,HTATSF1,ARFRP1,EIF3CL,CDK11B,ZNF707,DAPK3,DAZAP1,CCDC9,T…
TF	Factor: E2F-1; motif: NTTTTGGCGCCAWWWN	TF:M11533	0.00006552741229323903	4.1835769821881765	13223	255	203	19917	RPL41,LSM8,MAGED4,SELENOT,BCKDHA,GOLGA4,INO80D,SAFB2,GOLGA3,ALMS1,SMG1,HDGFL2,SAFB,KCMF1,POTEE,RPS14,CCDC88B,KIAA0232,SLC38A10,FKBP2,GTF2A2,ZNF627,ZNF638,ZNF207,SREK1,SCYL1,N4BP2,ZBTB37,CEP250,LYPLA1,ANKRD36C,ATP5MG,NUMA1,NDUFS7,SNRPG,COX7C,UPF1,ZNF652,RBM6,ZNF37A,NIPBL,RANBP2,TCEAL3,KRI1,KIF7,KIF3A,UBTF,MVD,RSF1,GAK,KIAA1109,RIF1,CRTAP,LUC7L,GCC2,OLA1,TCEAL4,PPIA,RPL23A,POLD1,TIMM8B,CCDC137,COMM…
TF	Factor: GABP-alpha; motif: NNNRCCGGAAGTGN; match class: 1	TF:M09935_1	0.00006596038025555113	4.18071684935239	1057	255	33	19917	SUPT4H1,GOLGA3,RPS14,SLC38A10,FKBP2,GTF2A2,NIPBL,FKBP1A,GAK,CCDC137,ELOC,PSMC5,AXIN1,ARFRP1,RER1,ZNF707,C3ORF38,TBL3,PSENEN,TAF10,ZGPAT,WDR46,TIMM13,ZNF646,ASB1,PPAN,ATAD2B,ZNF721,DMAP1,SLX1A,ANTKMT,DPP8,RPA3
TF	Factor: E2F; motif: TTTCGCGC	TF:M00425	0.00007072415085892742	4.15043225814451	11168	255	179	19917	RPL41,LSM8,APOC2,SUPT4H1,MAGED4,SELENOT,BCKDHA,DMAC1,GOLGA4,SAFB2,CNIH1,GOLGA3,SMG1,HDGFL2,SAFB,KCMF1,POTEE,RPS14,CCDC88B,KIAA0232,SLC38A10,GTF2A2,ZNF638,ZNF207,N4BP2,CEP250,LYPLA1,ATP5MG,NUMA1,NDUFS7,COX7C,UPF1,ZNF652,RBM6,NIPBL,RANBP2,TCEAL3,ANKRD12,KIF7,KIF3A,CSNK2A3,MMADHC,MVD,RSF1,CNIH4,GAK,KIAA1109,RIF1,LUC7L,GCC2,PPIA,RPL23A,TIMM8B,COMMD4,NDUFC2,YWHAQ,PNISR,TTC3,PTRHD1,TTBK2,METTL16,NASP,P…
TF	Factor: GABPA; motif: ACCGGAAGTN	TF:M03990	0.00007073643248068924	4.150356847165035	5312	255	102	19917	SUPT4H1,DMAC1,CNIH1,GOLGA3,KCMF1,RPS14,CCDC88B,SLC38A10,FKBP2,GTF2A2,SREK1,N4BP2,ZBTB37,ATP5MG,NUMA1,SNRPG,UPF1,RBM6,NIPBL,KRI1,MMADHC,FKBP1A,GAK,RIF1,RPL23A,TIMM8B,CCDC137,MTX3,PNISR,NASP,PEX2,ZNF221,CEP131,NFKBIL1,SURF6,RAN,AXIN1,UBXN7,SAMD8,ARFRP1,RER1,EIF3CL,ZNF707,DAPK3,CCDC9,TELO2,MINDY2,INTS1,C3ORF38,PSENEN,EIF3A,BMS1,PAXX,RPS3A,ZGPAT,WDR46,TIMM13,RAB8A,UBE2D2,HNRNPLL,CFAP410,SUGP2,DNAJC5,…
TF	Factor: RNF96; motif: BCCCGCRGCC	TF:M01199	0.00007248106394458853	4.139775440305408	8535	255	146	19917	LSM8,MAGED4,DMAC1,INO80D,CNIH1,GOLGA3,SMG1,HDGFL2,KCMF1,KIAA0232,SLC38A10,FKBP2,GTF2A2,ZNF627,ZNF638,SREK1,SCYL1,N4BP2,ZBTB37,LYPLA1,ANKRD36C,NUMA1,NDUFS7,UPF1,ZNF652,RBM6,NIPBL,TCEAL3,ANKRD12,KRI1,KIF7,KIF3A,UBTF,MVD,RSF1,FKBP1A,CNIH4,GAK,KIAA1109,RIF1,CRTAP,GCC2,CCDC137,YWHAQ,PTRHD1,FAM50A,MBD3,ELOC,ZNF221,RNF139,CEP131,NFKBIL1,PPP2CA,RAN,EDF1,RRBP1,RPL15,AXIN1,POLR2J3,SAMD8,HTATSF1,ARFRP1,MOB1…
TF	Factor: GABP-alpha; motif: NRCCGGAAGTN; match class: 1	TF:M11415_1	0.00007525637750010812	4.12345669047506	547	255	22	19917	SUPT4H1,GOLGA3,RPS14,FKBP2,GTF2A2,SREK1,ZBTB37,SNRPG,GAK,NASP,AXIN1,INTS1,PAXX,WDR46,TIMM13,ZNF646,ASB1,PPAN,STK19,DMAP1,ANTKMT,RPA3
TF	Factor: Elk-1:Pax-5; motif: ACCGGAACYACGCWTSANYG	TF:M08225	0.00008005603257399678	4.096605936513138	14162	255	213	19917	RPL41,UQCRHL,LSM8,APOC2,SUPT4H1,MAGED4,SELENOT,BCKDHA,DMAC1,GOLGA4,SAFB2,CNIH1,GOLGA3,ALMS1,SMG1,HDGFL2,SAFB,KCMF1,RPS14,CCDC88B,KIAA0232,SLC38A10,GTF2A2,ZNF627,ZNF638,ZNF207,SREK1,SCYL1,N4BP2,ZBTB37,CEP250,LYPLA1,ANKRD36C,ATP5MG,NUMA1,NDUFS7,SNRPG,COX7C,UPF1,ZNF652,RBM6,ZNF37A,NONO,NIPBL,RANBP2,TCEAL3,ANKRD12,KRI1,KIF7,KIF3A,MMADHC,MVD,RSF1,FKBP1A,CNIH4,GAK,KIAA1109,RIF1,CRTAP,LUC7L,GCC2,OLA1,CT…
TF	Factor: Erm; motif: NRCMGGAAGTN	TF:M11422	0.0000811298791498992	4.090819170941548	4711	255	93	19917	RPL41,APOC2,SUPT4H1,DMAC1,GOLGA3,HDGFL2,RPS14,SLC38A10,FKBP2,GTF2A2,SREK1,N4BP2,ZBTB37,ATP5MG,SNRPG,NIPBL,MMADHC,FKBP1A,GAK,RIF1,GCC2,RPL23A,POLD1,TIMM8B,CCDC137,MTX3,PNISR,NASP,CHD2,PEX2,ELOC,ZNF221,CEP131,SURF6,PURA,PSMC5,AXIN1,UBXN7,POLR2J3,ARFRP1,RER1,EIF3CL,CDK11B,ZNF707,GOLGB1,DAPK3,CCDC9,MINDY2,EIF2S3B,PCBP2,INTS1,C3ORF38,ARHGAP4,PSENEN,PAXX,ZGPAT,WDR46,TIMM13,RAB8A,HNRNPLL,SUGP2,SSR3,ZNF6…
TF	Factor: E2F-4:DP-2; motif: TTTCSCGC	TF:M00739	0.00008319389121015736	4.079908562064091	5682	255	107	19917	RPL41,INO80D,ALMS1,HDGFL2,KCMF1,POTEE,SLC38A10,FKBP2,ZNF638,N4BP2,CEP250,ATP5MG,NUMA1,COX7C,ZNF37A,NIPBL,RANBP2,ANKRD12,KRI1,KIF3A,CSNK2A3,UBTF,GAK,LUC7L,OLA1,PPIA,RPL23A,POLD1,TIMM8B,CCDC137,COMMD4,NDUFC2,MTX3,PTRHD1,METTL16,NASP,PEX2,MBD3,ELOC,NFKBIL1,CNOT7,SURF6,EDF1,PURA,PSMC5,RPL15,GRIPAP1,POLR2J3,SAMD8,RER1,CDK11B,PELP1,DAZAP1,CCDC9,RPL10A,TELO2,RGS12,MINDY2,UBN2,PAXX,RESF1,RPS3A,TIMM13,CAS…
TF	Factor: Elk-1:TBR2; motif: TNRCACCGGAAGN	TF:M08213	0.0000914640842397655	4.038749409524444	6334	255	116	19917	APOC2,SUPT4H1,SELENOT,DMAC1,GOLGA4,INO80D,GOLGA3,ALMS1,SMG1,HDGFL2,KCMF1,RPS14,SLC38A10,FKBP2,GTF2A2,ZNF638,ZNF207,SREK1,SCYL1,N4BP2,LYPLA1,ATP5MG,NDUFS7,SNRPG,COX7C,RBM6,NONO,NIPBL,KIF7,MMADHC,FKBP1A,KIAA1109,RIF1,TCEAL4,RPL23A,POLD1,TIMM8B,CCDC137,COMMD4,PNISR,PEX2,ELOC,ZNF221,SREK1IP1,RNF139,CNOT7,SURF6,RPL15,UBXN7,POLR2J3,SAMD8,HTATSF1,MOB1B,RER1,EIF3CL,CDK11B,DAPK3,DAZAP1,CCDC9,MINDY2,INTS1,…
TF	Factor: ATF-3; motif: GGCGCSSNSNGRTSACGTSA; match class: 1	TF:M04744_1	0.00009790720489648434	4.009185347710129	4937	255	96	19917	RPL41,LSM8,APOC2,SELENOT,INO80D,ALMS1,SMG1,POTEE,CCDC88B,KIAA0232,SREK1,SCYL1,ZBTB37,NUMA1,NDUFS7,SNRPG,UPF1,RANBP2,TCEAL3,ANKRD12,MVD,RSF1,GAK,KIAA1109,TCEAL4,RPL23A,COMMD4,YWHAQ,MTX3,PTRHD1,TTBK2,FAM50A,ZNF221,RNF139,PPP2CA,ANKS3,CNOT7,EDF1,RRBP1,PURA,POLR2J3,SAMD8,HTATSF1,ARFRP1,MOB1B,EIF3CL,CDK11B,PELP1,GOLGB1,DAZAP1,CCDC9,RGS12,TBL3,PSENEN,EIF3A,BMS1,TAF10,RPS3A,ZGPAT,TIMM13,SDHAF4,RAB8A,BDP…
TF	Factor: hoxa9; motif: RTCGTWANNN	TF:M10785	0.00009874717208241481	4.00547533283151	5703	255	107	19917	RPL41,LSM8,SUPT4H1,MAGED4,SELENOT,DMAC1,SAFB2,CNIH1,SAFB,POTEE,RPS14,SREK1,CEP250,ATP5MG,NUMA1,SNRPG,UPF1,ZNF652,RBM6,ZNF37A,NIPBL,RANBP2,TCEAL3,ANKRD12,KIF7,CSNK2A3,UBTF,MVD,GAK,LUC7L,GCC2,CTNNBL1,RPL23A,NDUFC2,TTC3,PTRHD1,TTBK2,METTL16,NASP,CHD2,MBD3,CEP131,NFKBIL1,PPP2CA,PSMC5,HTATSF1,RER1,CDK11B,DAPK3,MACF1,MINDY2,EIF2S3B,C3ORF38,ARHGEF18,ARHGAP4,PSENEN,EIF3A,PAXX,TAF10,RPS3A,WDR46,TIMM13,CAS…
TF	Factor: Zfx; motif: SNSCAGGCCKCGSCSS	TF:M01593	0.0001004684448239283	3.9979703202408556	4198	255	85	19917	SELENOT,INO80D,GOLGA3,SMG1,HDGFL2,KCMF1,KIAA0232,ZNF638,SCYL1,CEP250,ANKRD36C,UPF1,NIPBL,KRI1,UBTF,MVD,RSF1,FKBP1A,CRTAP,OLA1,POLD1,YWHAQ,MBD3,SURF6,RAN,EDF1,PURA,RPL15,AXIN1,UBXN7,MOB1B,RER1,CDK11B,ZNF707,DAZAP1,CCDC9,RPL10A,INTS1,CCDC12,ARHGAP4,EIF3A,BMS1,RPS3A,TBCD,UBE2D2,CFAP410,SMG6,DNAJC5,CFL2,SCAPER,CEP192,ATP5F1E,CANX,EWSR1,GRINA,CMC4,ENGASE,NXF1,LUC7L3,SLK,ATAD2B,STK19,HDAC4,PAF1,TSR3,LN…
TF	Factor: REX-1; motif: GGCMGCCATTTT	TF:M10119	0.0001114561162286112	3.952896094330868	1902	255	48	19917	SAFB2,SAFB,ZNF638,ZNF207,SREK1,ATP5MG,CSNK2A3,MMADHC,RSF1,RIF1,PPIA,RPL23A,CCDC137,MTX3,PNISR,PTRHD1,METTL16,NASP,SREK1IP1,RNF139,PPP2CA,UBXN7,HTATSF1,RER1,PELP1,TBL3,EIF3A,UBN2,CFL2,SCAPER,ATRAID,IGIP,ATP5F1E,EWSR1,RBM15,DOHH,NACA2,ZBTB17,LUC7L3,PAF1,CLK1,DAZ1,PPT1,RBM12B,USP34,RSRC2,FAM184A,MORC2
TF	Factor: YY1; motif: NNNNAARATGGNNNN; match class: 1	TF:M07370_1	0.00011327499859699578	3.9458659345278715	1087	255	33	19917	RPL41,SUPT4H1,SAFB2,SAFB,ZNF638,ZNF207,NDUFS7,NONO,CSNK2A3,TCEAL4,PNISR,PTRHD1,NASP,CHD2,PPP2CA,PSMC5,RER1,MACF1,ARHGAP4,UBN2,ATRAID,CANX,EWSR1,DOHH,LUC7L3,ATAD2B,CLK1,DAZ1,USP34,CKLF,RSRC2,CAPZA1,MRFAP1
TF	Factor: YY1; motif: GCCGCCATTTTG	TF:M02044	0.00011608758412433071	3.9352142267268273	6150	255	113	19917	RPL41,UQCRHL,SELENOT,BCKDHA,GOLGA4,SAFB2,CNIH1,SAFB,FKBP2,ZNF627,ZNF638,ZNF207,SREK1,ZBTB37,CEP250,LYPLA1,ATP5MG,NUMA1,NDUFS7,COX7C,NONO,RANBP2,ANKRD12,KIF7,KIF3A,CSNK2A3,MMADHC,RSF1,CNIH4,GAK,RIF1,TCEAL4,PPIA,RPL23A,TIMM8B,MTX3,PNISR,TTC3,PTRHD1,TTBK2,METTL16,NASP,CHD2,SREK1IP1,RNF139,PPP2CA,RAN,PSMC5,GRIPAP1,POLR2J3,HTATSF1,RER1,EIF3CL,CDK11B,PELP1,CCDC9,TELO2,EIF2S3B,PCBP2,TBL3,PSENEN,EIF3A,UB…
TF	Factor: IRX2a; motif: ACRYGNNNNACRYGT; match class: 1	TF:M11022_1	0.00012004291136983251	3.920663480287168	6298	255	115	19917	LSM8,GOLGA4,SAFB2,CNIH1,SAFB,KCMF1,POTEE,KIAA0232,FKBP2,ZNF638,SREK1,N4BP2,NUMA1,NDUFS7,SNRPG,UPF1,ZNF37A,NONO,NIPBL,TCEAL3,ANKRD12,KRI1,CSNK2A3,MVD,FKBP1A,GAK,RIF1,CRTAP,LUC7L,GCC2,TCEAL4,PPIA,RPL23A,POLD1,MTX3,PTRHD1,METTL16,FAM50A,MBD3,RNF139,CEP131,ANKS3,CNOT7,RAN,EDF1,RRBP1,PURA,PSMC5,AXIN1,ARFRP1,MOB1B,RER1,CDK11B,PELP1,DAZAP1,CCDC9,INTS1,PSENEN,UBN2,BMS1,PAXX,TAF10,RPS3A,ZGPAT,TIMM13,RAB8A…
TF	Factor: ESE-1; motif: NSMGGAARTN	TF:M01214	0.00012199002743202971	3.913675671032333	7623	255	133	19917	RPL41,APOC2,SUPT4H1,BCKDHA,DMAC1,GOLGA4,CNIH1,GOLGA3,HDGFL2,KCMF1,RPS14,CCDC88B,SLC38A10,FKBP2,GTF2A2,SREK1,N4BP2,ZBTB37,LYPLA1,ATP5MG,NUMA1,SNRPG,UPF1,NIPBL,TCEAL3,KIF7,GAK,LUC7L,GCC2,CTNNBL1,PPIA,RPL23A,POLD1,TIMM8B,CCDC137,MTX3,PNISR,PTRHD1,NASP,CHD2,PEX2,FAM50A,ELOC,ZNF221,RNF139,CEP131,NFKBIL1,PPP2CA,SURF6,PSMC5,RPL15,AXIN1,POLR2J3,SAMD8,ARFRP1,MOB1B,RER1,EIF3CL,CDK11B,ZNF707,GOLGB1,DAPK3,DA…
TF	Factor: ESE-1; motif: NSMGGAARTN	TF:M02055	0.00012199002743202971	3.913675671032333	7623	255	133	19917	RPL41,APOC2,SUPT4H1,BCKDHA,DMAC1,GOLGA4,CNIH1,GOLGA3,HDGFL2,KCMF1,RPS14,CCDC88B,SLC38A10,FKBP2,GTF2A2,SREK1,N4BP2,ZBTB37,LYPLA1,ATP5MG,NUMA1,SNRPG,UPF1,NIPBL,TCEAL3,KIF7,GAK,LUC7L,GCC2,CTNNBL1,PPIA,RPL23A,POLD1,TIMM8B,CCDC137,MTX3,PNISR,PTRHD1,NASP,CHD2,PEX2,FAM50A,ELOC,ZNF221,RNF139,CEP131,NFKBIL1,PPP2CA,SURF6,PSMC5,RPL15,AXIN1,POLR2J3,SAMD8,ARFRP1,MOB1B,RER1,EIF3CL,CDK11B,ZNF707,GOLGB1,DAPK3,DA…
TF	Factor: Elk-1:Pax-5; motif: ACCGGAACYACGCWTSANYG; match class: 1	TF:M08225_1	0.00012199002743202971	3.913675671032333	8075	255	139	19917	RPL41,LSM8,APOC2,SUPT4H1,MAGED4,SELENOT,BCKDHA,GOLGA4,CNIH1,GOLGA3,ALMS1,HDGFL2,KCMF1,RPS14,CCDC88B,KIAA0232,ZNF627,ZNF638,SREK1,SCYL1,ZBTB37,LYPLA1,ATP5MG,NDUFS7,SNRPG,UPF1,ZNF652,RBM6,ZNF37A,NIPBL,ANKRD12,KIF7,KIF3A,MMADHC,MVD,RSF1,FKBP1A,KIAA1109,LUC7L,CTNNBL1,PPIA,RPL23A,TIMM8B,CCDC137,NDUFC2,YWHAQ,MTX3,PNISR,PTRHD1,TTBK2,PEX2,ELOC,ZNF221,SREK1IP1,PPP2CA,ANKS3,EDF1,PURA,RPL15,AXIN1,GRIPAP1,SA…
TF	Factor: Cdx-2; motif: NRTCGTAANNNN; match class: 1	TF:M10849_1	0.0001222303804944394	3.9128208363090535	4557	255	90	19917	RPL41,LSM8,DMAC1,CNIH1,ZNF627,SREK1,CEP250,ATP5MG,NUMA1,SNRPG,UPF1,ZNF652,RBM6,NIPBL,CSNK2A3,MVD,CNIH4,GAK,CRTAP,LUC7L,GCC2,TCEAL4,CTNNBL1,RPL23A,NDUFC2,PNISR,TTC3,PTRHD1,TTBK2,METTL16,NASP,CHD2,PEX2,ELOC,RNF139,NFKBIL1,PPP2CA,SURF6,PSMC5,HTATSF1,RER1,PELP1,RPL10A,TELO2,EIF2S3B,C3ORF38,PSENEN,EIF3A,PAXX,CASP8AP2,SDHAF4,BDP1,HNRNPLL,CFAP410,KIF5B,DNAJC5,CFL2,SCAPER,SSR3,TLR1,RNF2,ATRAID,SLC25A5,RB…
TF	Factor: SAP-1; motif: ACCGGAAGTNN	TF:M09607	0.0001233178804424544	3.908973948428637	4762	255	93	19917	RPL41,APOC2,SUPT4H1,BCKDHA,DMAC1,GOLGA4,GOLGA3,HDGFL2,RPS14,SLC38A10,FKBP2,GTF2A2,ZBTB37,ATP5MG,NIPBL,GAK,GCC2,RPL23A,POLD1,TIMM8B,CCDC137,MTX3,PNISR,PTRHD1,NASP,CHD2,PEX2,ELOC,ZNF221,CEP131,NFKBIL1,PPP2CA,EDF1,PSMC5,RPL15,AXIN1,POLR2J3,ARFRP1,MOB1B,RER1,EIF3CL,CDK11B,ZNF707,GOLGB1,DAPK3,CCDC9,MINDY2,INTS1,C3ORF38,ARHGAP4,TBL3,PSENEN,EIF3A,UBN2,BMS1,PAXX,RPS3A,ZGPAT,WDR46,TIMM13,RAB8A,KIF5B,HBE1,…
TF	Factor: ESE-1; motif: NWTRCGGAWGCN	TF:M11382	0.00012814926936636684	3.892283865570722	10437	255	169	19917	RPL41,UQCRHL,LSM8,APOC2,MAGED4,BCKDHA,DMAC1,GOLGA4,CNIH1,GOLGA3,SMG1,HDGFL2,RPS14,CCDC88B,KIAA0232,SLC38A10,FKBP2,GTF2A2,ZNF638,ZNF207,SREK1,N4BP2,ZBTB37,CEP250,LYPLA1,ATP5MG,NUMA1,NDUFS7,SNRPG,COX7C,UPF1,NIPBL,TCEAL3,KRI1,KIF7,CSNK2A3,MMADHC,UBTF,FKBP1A,CNIH4,GAK,KIAA1109,RIF1,CRTAP,GCC2,OLA1,TCEAL4,CTNNBL1,PPIA,POLD1,TIMM8B,CCDC137,COMMD4,NDUFC2,YWHAQ,MTX3,PNISR,TTBK2,NASP,PEX2,FAM50A,ELOC,ZNF2…
TF	Factor: ELK1; motif: ACCGGAAGTN; match class: 1	TF:M03970_1	0.00015128074320616623	3.820216350572694	1104	255	33	19917	SUPT4H1,GOLGA3,HDGFL2,RPS14,FKBP2,GTF2A2,SREK1,SNRPG,FKBP1A,GAK,RPL23A,CCDC137,NASP,PEX2,AXIN1,ARFRP1,RER1,CDK11B,ZNF707,INTS1,PSENEN,PAXX,ZGPAT,WDR46,TIMM13,ZNF646,ASB1,PPAN,STK19,DMAP1,ANTKMT,SETD2,RPA3
TF	Factor: WT1; motif: GNGGGGGCGGGG	TF:M03893	0.00015306175623797718	3.8151333078621352	8336	255	142	19917	LSM8,SUPT4H1,MAGED4,DMAC1,SAFB2,GOLGA3,SMG1,HDGFL2,SAFB,KCMF1,POTEE,RPS14,CCDC88B,KIAA0232,SLC38A10,FKBP2,GTF2A2,ZNF627,ZNF638,SCYL1,N4BP2,ZBTB37,CEP250,LYPLA1,ANKRD36C,NUMA1,COX7C,ZNF652,NONO,NIPBL,ANKRD12,KIF7,UBTF,RSF1,RIF1,GCC2,CTNNBL1,PPIA,POLD1,CCDC137,COMMD4,YWHAQ,MTX3,PTRHD1,METTL16,NASP,PEX2,MBD3,ELOC,RNF139,CEP131,NFKBIL1,PPP2CA,CNOT7,EDF1,RRBP1,PURA,AXIN1,GRIPAP1,UBXN7,POLR2J3,SAMD8,HT…
TF	Factor: Egr-1; motif: CCGCCCMCG	TF:M04797	0.0001558480219461735	3.8072987055033645	5133	255	98	19917	DMAC1,SAFB2,ALMS1,HDGFL2,SAFB,KCMF1,KIAA0232,SLC38A10,FKBP2,ZNF638,SCYL1,CEP250,ANKRD36C,UPF1,ZNF652,NONO,NIPBL,ANKRD12,KRI1,KIF7,UBTF,PPIA,POLD1,CCDC137,COMMD4,YWHAQ,MTX3,METTL16,PEX2,RNF139,PPP2CA,CNOT7,RAN,RRBP1,PURA,AXIN1,GRIPAP1,UBXN7,SAMD8,RER1,CDK11B,DAZAP1,CCDC9,TELO2,MINDY2,INTS1,TBL3,UBN2,PAXX,RPS3A,WDR46,CASP8AP2,RAB8A,TBCD,UBE2D2,HNRNPLL,CFAP410,HELZ,DNAJC5,CFL2,RNF2,SNRNP70,ZNF646,AK…
TF	Factor: YY1; motif: GCCGCCATTTTG; match class: 1	TF:M02044_1	0.0001576600219915264	3.802278417194688	1211	255	35	19917	SAFB2,SAFB,ZNF207,ZBTB37,NDUFS7,COX7C,NONO,CSNK2A3,RSF1,PPIA,TIMM8B,PNISR,PTRHD1,CHD2,PPP2CA,PSMC5,HTATSF1,RER1,EIF3CL,TBL3,EIF3A,RPS3A,CFAP410,KIF5B,ATRAID,DHX38,FUNDC2,CLK1,DAZ1,USP34,CKLF,MAGEF1,RSRC2,CAPZA1,MRFAP1
TF	Factor: Elk-1; motif: NACMGGAAGTN; match class: 1	TF:M11432_1	0.00016570134663127105	3.780673962116851	1538	255	41	19917	SUPT4H1,GOLGA3,HDGFL2,RPS14,FKBP2,GTF2A2,SREK1,ZBTB37,ATP5MG,SNRPG,FKBP1A,GAK,RPL23A,CCDC137,NASP,PEX2,AXIN1,ARFRP1,RER1,CDK11B,ZNF707,CCDC9,INTS1,ARHGAP4,PSENEN,PAXX,ZGPAT,WDR46,TIMM13,ZNF646,CANX,EWSR1,ASB1,PPAN,STK19,FUNDC2,DMAP1,ANTKMT,DPP8,SETD2,RPA3
TF	Factor: Pet-1; motif: ACCGGAWRTN	TF:M02072	0.0001679664670829667	3.774777412407659	2408	255	56	19917	SUPT4H1,GOLGA3,RPS14,SLC38A10,FKBP2,GTF2A2,N4BP2,ZBTB37,SNRPG,NIPBL,FKBP1A,GAK,RPL23A,TIMM8B,MTX3,PNISR,NASP,PEX2,ZNF221,CEP131,NFKBIL1,AXIN1,ARFRP1,EIF3CL,DAPK3,CCDC9,MINDY2,INTS1,C3ORF38,PSENEN,PAXX,ZGPAT,WDR46,TIMM13,HNRNPLL,SSR3,ZNF646,CANX,RBM15,DHX38,ASB1,PPAN,CMC4,HYPK,ZBTB17,STK19,PAF1,TSR3,DMAP1,FAM199X,MAGEF1,ANTKMT,DPP8,ZSWIM9,CREBZF,RPA3
TF	Factor: RNF96; motif: BCCCGCRGCC; match class: 1	TF:M01199_1	0.0001843911598594833	3.7342599038695634	4335	255	86	19917	CNIH1,GOLGA3,SMG1,HDGFL2,KCMF1,KIAA0232,SLC38A10,FKBP2,ZNF627,SREK1,SCYL1,N4BP2,LYPLA1,ANKRD36C,NDUFS7,RBM6,ANKRD12,KRI1,UBTF,MVD,FKBP1A,GAK,KIAA1109,CRTAP,YWHAQ,PTRHD1,FAM50A,MBD3,ELOC,RNF139,CEP131,PPP2CA,RAN,RRBP1,AXIN1,ARFRP1,MOB1B,RER1,PELP1,DAZAP1,INTS1,TBL3,UBN2,ZGPAT,TBCD,BDP1,HNRNPLL,CFAP410,SMG6,HELZ,SUGP2,DNAJC5,CFL2,SCAPER,RNF2,OSER1,EWSR1,RBM15,PRAME,ASB1,CMC4,ENGASE,NCK1,LUC7L3,IFT1…
TF	Factor: ER81; motif: NACCGGAAGTN	TF:M11421	0.00018460400709872262	3.7337588762138116	2356	255	55	19917	SUPT4H1,GOLGA3,RPS14,SLC38A10,FKBP2,GTF2A2,SREK1,N4BP2,ZBTB37,SNRPG,NIPBL,FKBP1A,GAK,RPL23A,TIMM8B,MTX3,PNISR,NASP,PEX2,ZNF221,CEP131,AXIN1,ARFRP1,EIF3CL,DAPK3,CCDC9,MINDY2,INTS1,C3ORF38,PSENEN,PAXX,ZGPAT,WDR46,TIMM13,HNRNPLL,SSR3,ZNF646,RBM15,DHX38,ASB1,PPAN,CMC4,HYPK,ZBTB17,STK19,PAF1,TSR3,DMAP1,FAM199X,MAGEF1,ANTKMT,DPP8,ZSWIM9,CREBZF,RPA3
TF	Factor: Elf-1; motif: NANCCGGAAGTN	TF:M11449	0.00018994372870020953	3.721375040808154	4339	255	86	19917	RPL41,SUPT4H1,BCKDHA,GOLGA4,GOLGA3,HDGFL2,RPS14,CCDC88B,SLC38A10,FKBP2,GTF2A2,SREK1,ZBTB37,ATP5MG,SNRPG,COX7C,NIPBL,TCEAL3,MMADHC,GAK,RIF1,GCC2,RPL23A,TIMM8B,CCDC137,MTX3,PNISR,NASP,PEX2,ZNF221,CEP131,PSMC5,AXIN1,POLR2J3,SAMD8,ARFRP1,EIF3CL,CDK11B,ZNF707,DAPK3,DAZAP1,CCDC9,MINDY2,INTS1,C3ORF38,ARHGAP4,PSENEN,BMS1,PAXX,TAF10,ZGPAT,WDR46,TIMM13,RAB8A,HBE1,SSR3,ZNF646,UBXN1,SLC25A5,RBM15,DHX38,SSB,A…
TF	Factor: Sp1; motif: GGGGCGGGGC	TF:M00931	0.0002043422800206728	3.689641765134938	10344	255	167	19917	RPL41,SUPT4H1,MAGED4,DMAC1,GOLGA4,INO80D,GOLGA3,ALMS1,SMG1,HDGFL2,KCMF1,POTEE,CCDC88B,KIAA0232,SLC38A10,FKBP2,GTF2A2,ZNF627,SCYL1,ZBTB37,CEP250,LYPLA1,ANKRD36C,NUMA1,NDUFS7,COX7C,ZNF652,RBM6,ZNF37A,NONO,NIPBL,RANBP2,TCEAL3,ANKRD12,KRI1,KIF7,KIF3A,UBTF,MVD,RSF1,KIAA1109,RIF1,CRTAP,GCC2,OLA1,CTNNBL1,PPIA,POLD1,CCDC137,COMMD4,NDUFC2,YWHAQ,MTX3,PTRHD1,NASP,FAM50A,MBD3,RNF139,CEP131,NFKBIL1,PPP2CA,CNO…
TF	Factor: RREB-1; motif: GGGWCSA	TF:M05439	0.00020824483169076344	3.681425768293493	8689	255	146	19917	LSM8,MAGED4,INO80D,SAFB2,CNIH1,GOLGA3,ALMS1,SMG1,SAFB,KCMF1,RPS14,SLC38A10,FKBP2,GTF2A2,SREK1,SCYL1,N4BP2,ANKRD36C,ATP5MG,UPF1,ZNF652,ZNF37A,NONO,NIPBL,RANBP2,ANKRD12,KRI1,KIF7,KIF3A,MMADHC,MVD,FKBP1A,CNIH4,CRTAP,GCC2,TCEAL4,PPIA,POLD1,COMMD4,NDUFC2,YWHAQ,TTC3,TTBK2,NASP,CHD2,MBD3,ELOC,RNF139,PPP2CA,CNOT7,SURF6,EDF1,PURA,RPL15,AXIN1,GRIPAP1,UBXN7,POLR2J3,SAMD8,HTATSF1,ARFRP1,MOB1B,RER1,CDK11B,ZNF…
TF	Factor: E2F-1; motif: NNNNGGCGGGAARN	TF:M09892	0.00020865140893686757	3.68057867833094	13661	255	206	19917	RPL41,LSM8,SUPT4H1,MAGED4,DMAC1,INO80D,SAFB2,GOLGA3,ALMS1,SMG1,HDGFL2,SAFB,KCMF1,RPS14,CCDC88B,KIAA0232,SLC38A10,FKBP2,GTF2A2,ZNF627,ZNF638,ZNF207,SREK1,SCYL1,N4BP2,ZBTB37,CEP250,ANKRD36C,ATP5MG,NUMA1,NDUFS7,SNRPG,UPF1,RBM6,ZNF37A,RANBP2,ANKRD12,KRI1,KIF7,UBTF,MVD,RSF1,GAK,KIAA1109,RIF1,LUC7L,GCC2,OLA1,CTNNBL1,PPIA,POLD1,TIMM8B,CCDC137,COMMD4,NDUFC2,YWHAQ,MTX3,PNISR,PTRHD1,TTBK2,METTL16,NASP,PEX2…
TF	Factor: E2F-1; motif: NTTTCGCGCS; match class: 1	TF:M00940_1	0.00020865140893686757	3.68057867833094	2672	255	60	19917	SELENOT,POTEE,SLC38A10,SREK1,SCYL1,N4BP2,CEP250,ATP5MG,NDUFS7,UPF1,ZNF37A,RANBP2,KIF7,RSF1,PPIA,COMMD4,YWHAQ,METTL16,NASP,CEP131,NFKBIL1,PURA,POLR2J3,HTATSF1,CDK11B,PELP1,DAZAP1,TELO2,INTS1,ARHGEF18,RPS3A,TIMM13,CASP8AP2,RAB8A,TBCD,HNRNPLL,SMG6,SUGP2,CFL2,SCAPER,CEP192,SRPRB,SNRNP70,ZNF646,ATRAID,ZNF444,ASB1,PPAN,IFT140,SLK,LNPEP,CYTH2,SMAD4,FCHSD2,FAM199X,ZSWIM9,CCHCR1,FAM184A,CCZ1B,RPA3
TF	Factor: TEF-3:ER81; motif: ACCGGAAATRCC	TF:M08423	0.0002146603060778324	3.6682482557273555	3888	255	79	19917	RPL41,LSM8,SUPT4H1,CNIH1,GOLGA3,RPS14,SLC38A10,FKBP2,GTF2A2,ZBTB37,LYPLA1,ATP5MG,COX7C,RBM6,NIPBL,MVD,FKBP1A,GAK,GCC2,PPIA,RPL23A,TIMM8B,CCDC137,MTX3,PNISR,TTBK2,NASP,PEX2,ZNF221,CEP131,CNOT7,RPL15,AXIN1,SAMD8,ARFRP1,RER1,EIF3CL,DAPK3,CCDC9,TELO2,MINDY2,C3ORF38,PSENEN,BMS1,RESF1,ZGPAT,WDR46,TIMM13,HELZ,DNAJC5,RNF2,ZNF646,UBXN1,RBM15,ZNF33A,GLB1,ASB1,PPAN,CMC4,ZBTB17,IFT140,SLK,PAF1,TSR3,THRAP3,CY…
TF	Factor: CHD2; motif: TCTCGCGAG; match class: 1	TF:M04710_1	0.00021746416119294414	3.6626123059673676	11589	255	182	19917	UQCRHL,LSM8,SUPT4H1,SELENOT,BCKDHA,DMAC1,GOLGA4,SAFB2,GOLGA3,ALMS1,SAFB,KCMF1,CCDC88B,KIAA0232,SLC38A10,FKBP2,GTF2A2,ZNF627,ZNF638,ZNF207,SREK1,N4BP2,ZBTB37,CEP250,LYPLA1,ANKRD36C,NUMA1,NDUFS7,SNRPG,COX7C,ZNF652,RBM6,ZNF37A,NONO,NIPBL,RANBP2,TCEAL3,ANKRD12,KIF7,KIF3A,CSNK2A3,UBTF,MVD,RSF1,CNIH4,GAK,RIF1,CRTAP,GCC2,OLA1,CTNNBL1,PPIA,RPL23A,TIMM8B,CCDC137,COMMD4,NDUFC2,YWHAQ,MTX3,PNISR,PTRHD1,TTBK2…
TF	Factor: pax-6; motif: NYACGCNYSANYGMNCN	TF:M11882	0.00021894770734009065	3.6596595980615363	15642	255	227	19917	RPL41,LSM8,APOC2,SUPT4H1,MAGED4,SELENOT,BCKDHA,DMAC1,GOLGA4,SAFB2,CNIH1,GOLGA3,ALMS1,SMG1,HDGFL2,SAFB,KCMF1,POTEE,RPS14,CCDC88B,KIAA0232,SLC38A10,FKBP2,GTF2A2,ZNF627,ZNF638,ZNF207,SREK1,SCYL1,N4BP2,ZBTB37,CEP250,LYPLA1,ANKRD36C,ATP5MG,NUMA1,NDUFS7,SNRPG,COX7C,UPF1,ZNF652,RBM6,ZNF37A,NONO,NIPBL,RANBP2,TCEAL3,ANKRD12,KRI1,KIF7,KIF3A,MMADHC,UBTF,MVD,RSF1,FKBP1A,CNIH4,GAK,KIAA1109,RIF1,CRTAP,LUC7L,OL…
TF	Factor: ESE-1; motif: NSMGGAARTN; match class: 1	TF:M02055_1	0.00022116402773764417	3.6552855094897434	2194	255	52	19917	RPL41,SUPT4H1,GOLGA4,GOLGA3,HDGFL2,RPS14,SLC38A10,FKBP2,GTF2A2,N4BP2,ATP5MG,NIPBL,GAK,LUC7L,PPIA,CCDC137,MTX3,PEX2,ELOC,PSMC5,AXIN1,RER1,CDK11B,ZNF707,CCDC9,TELO2,C3ORF38,PSENEN,RESF1,WDR46,TIMM13,DNAJC5,SSR3,RNF2,ZNF646,UBXN1,SLC25A5,ASB1,PPAN,CMC4,ATAD2B,ZNF721,STK19,CYTH2,ARHGAP45,DMAP1,SLX1A,ANTKMT,ZSWIM9,CAPZA1,CCZ1B,RPA3
TF	Factor: ESE-1; motif: NSMGGAARTN; match class: 1	TF:M01214_1	0.00022116402773764417	3.6552855094897434	2194	255	52	19917	RPL41,SUPT4H1,GOLGA4,GOLGA3,HDGFL2,RPS14,SLC38A10,FKBP2,GTF2A2,N4BP2,ATP5MG,NIPBL,GAK,LUC7L,PPIA,CCDC137,MTX3,PEX2,ELOC,PSMC5,AXIN1,RER1,CDK11B,ZNF707,CCDC9,TELO2,C3ORF38,PSENEN,RESF1,WDR46,TIMM13,DNAJC5,SSR3,RNF2,ZNF646,UBXN1,SLC25A5,ASB1,PPAN,CMC4,ATAD2B,ZNF721,STK19,CYTH2,ARHGAP45,DMAP1,SLX1A,ANTKMT,ZSWIM9,CAPZA1,CCZ1B,RPA3
TF	Factor: PEA3; motif: NACCGGAAGTN	TF:M11427	0.00022846434672310276	3.641181564651217	10689	255	171	19917	RPL41,LSM8,APOC2,SUPT4H1,MAGED4,BCKDHA,DMAC1,GOLGA4,CNIH1,GOLGA3,ALMS1,HDGFL2,KCMF1,POTEE,RPS14,CCDC88B,SLC38A10,FKBP2,GTF2A2,ZNF638,SREK1,SCYL1,N4BP2,ZBTB37,LYPLA1,ATP5MG,NUMA1,NDUFS7,SNRPG,COX7C,UPF1,RBM6,ZNF37A,NIPBL,ANKRD12,KRI1,MMADHC,RSF1,FKBP1A,GAK,KIAA1109,RIF1,GCC2,RPL23A,POLD1,TIMM8B,CCDC137,NDUFC2,MTX3,PNISR,PTRHD1,NASP,CHD2,PEX2,MBD3,ELOC,ZNF221,SREK1IP1,CEP131,NFKBIL1,PPP2CA,ANKS3,CN…
TF	Factor: Net; motif: NACCGGAAGTN	TF:M11442	0.00023455633272254596	3.6297528371600976	2022	255	49	19917	SUPT4H1,GOLGA3,SLC38A10,FKBP2,GTF2A2,N4BP2,SNRPG,NIPBL,FKBP1A,GAK,RPL23A,TIMM8B,PNISR,NASP,PEX2,ZNF221,CEP131,AXIN1,ARFRP1,DAPK3,CCDC9,MINDY2,INTS1,C3ORF38,PSENEN,PAXX,ZGPAT,WDR46,TIMM13,HNRNPLL,SSR3,ZNF646,RBM15,DHX38,ASB1,PPAN,CMC4,HYPK,ZBTB17,STK19,PAF1,TSR3,DMAP1,MAGEF1,ANTKMT,DPP8,ZSWIM9,CREBZF,RPA3
TF	Factor: HOXB2:PEA3; motif: ACCGGAAATGRN	TF:M08345	0.0002381277343504478	3.6231900200763976	8100	255	138	19917	RPL41,LSM8,APOC2,SUPT4H1,SELENOT,DMAC1,CNIH1,GOLGA3,HDGFL2,POTEE,RPS14,KIAA0232,SLC38A10,FKBP2,GTF2A2,ZNF638,N4BP2,ZBTB37,LYPLA1,ATP5MG,NDUFS7,COX7C,UPF1,ZNF652,RBM6,NONO,NIPBL,TCEAL3,ANKRD12,KRI1,UBTF,MVD,FKBP1A,CNIH4,GCC2,TCEAL4,PPIA,RPL23A,POLD1,TIMM8B,COMMD4,NDUFC2,MTX3,PNISR,TTBK2,NASP,PEX2,ELOC,ZNF221,SREK1IP1,CEP131,NFKBIL1,CNOT7,SURF6,PURA,RPL15,AXIN1,UBXN7,SAMD8,HTATSF1,ARFRP1,RER1,EIF3C…
TF	Factor: Elk-1:SREBP-2; motif: RTCACGTGACCGGAAGN; match class: 1	TF:M08229_1	0.0002381277343504478	3.6231900200763976	3125	255	67	19917	APOC2,GOLGA3,SAFB,KCMF1,FKBP2,GTF2A2,ZNF638,SREK1,N4BP2,ATP5MG,SNRPG,COX7C,UPF1,RBM6,ZNF37A,NONO,UBTF,GAK,RPL23A,COMMD4,TTC3,METTL16,NASP,PEX2,MBD3,ZNF221,EDF1,PSMC5,ARFRP1,MOB1B,DAZAP1,CCDC9,TELO2,MINDY2,EIF3A,RPS3A,ZGPAT,WDR46,TIMM13,CFAP410,KIF5B,SCAPER,OSER1,SNRNP70,ZNF646,ATP5F1E,SLC25A5,EWSR1,GRINA,ZNF33A,GLB1,NXF1,SLK,PTPN11,TSR3,CLK1,RBM12B,USP34,SLX1A,MAGEF1,ANTKMT,DPP8,ZSWIM9,PPP1R26,NS…
TF	Factor: Elk-1; motif: RACCGGAAGTR; match class: 1	TF:M01165_1	0.0002381277343504478	3.6231900200763976	2201	255	52	19917	SUPT4H1,HDGFL2,RPS14,FKBP2,GTF2A2,SREK1,SNRPG,COX7C,RBM6,KRI1,GAK,GCC2,RPL23A,TIMM8B,CCDC137,TTBK2,NASP,PSMC5,AXIN1,SAMD8,ARFRP1,CDK11B,ZNF707,CCDC9,INTS1,TBL3,PSENEN,EIF3A,PAXX,TAF10,ZGPAT,WDR46,RAB8A,HNRNPLL,KIF5B,ZNF646,ASB1,PTPN11,ATAD2B,TSR3,LNPEP,DMAP1,FAM199X,CKLF,TBCA,MAGEF1,DPP8,ARL5A,SETD2,CAPZA1,MRFAP1,RPA3
TF	Factor: E2F-4; motif: NGGCGGGAARN	TF:M07084	0.00024169697973707238	3.6167287765336766	10945	255	174	19917	RPL41,LSM8,SUPT4H1,MAGED4,INO80D,SAFB2,GOLGA3,ALMS1,SMG1,HDGFL2,SAFB,KCMF1,RPS14,KIAA0232,SLC38A10,FKBP2,GTF2A2,ZNF627,ZNF638,ZNF207,SREK1,SCYL1,N4BP2,ZBTB37,CEP250,ANKRD36C,ATP5MG,NUMA1,SNRPG,UPF1,RBM6,ZNF37A,RANBP2,ANKRD12,KRI1,UBTF,MVD,RSF1,GAK,KIAA1109,RIF1,LUC7L,OLA1,CTNNBL1,PPIA,POLD1,TIMM8B,CCDC137,COMMD4,NDUFC2,YWHAQ,MTX3,PNISR,PTRHD1,METTL16,NASP,PEX2,FAM50A,ELOC,ZNF221,SREK1IP1,CEP131,N…
TF	Factor: Cdx-2; motif: NRTCGTAANNNN	TF:M10849	0.00025123610605963113	3.599917946401225	11281	255	178	19917	RPL41,LSM8,APOC2,SUPT4H1,MAGED4,SELENOT,DMAC1,GOLGA4,SAFB2,CNIH1,GOLGA3,ALMS1,HDGFL2,SAFB,POTEE,RPS14,SLC38A10,GTF2A2,ZNF627,ZNF207,SREK1,SCYL1,ZBTB37,CEP250,ATP5MG,NUMA1,NDUFS7,SNRPG,COX7C,UPF1,ZNF652,RBM6,ZNF37A,NIPBL,RANBP2,TCEAL3,ANKRD12,KIF3A,CSNK2A3,UBTF,MVD,FKBP1A,CNIH4,GAK,KIAA1109,CRTAP,LUC7L,GCC2,TCEAL4,CTNNBL1,RPL23A,POLD1,COMMD4,NDUFC2,YWHAQ,PNISR,TTC3,PTRHD1,TTBK2,METTL16,NASP,CHD2,P…
TF	Factor: WT1; motif: CGCCCCCNCN	TF:M02036	0.0002515823168108107	3.5993198877950374	9820	255	160	19917	LSM8,SUPT4H1,MAGED4,DMAC1,INO80D,SAFB2,ALMS1,HDGFL2,SAFB,KCMF1,POTEE,RPS14,KIAA0232,SLC38A10,FKBP2,GTF2A2,ZNF638,SCYL1,N4BP2,ZBTB37,CEP250,LYPLA1,ANKRD36C,ATP5MG,NUMA1,COX7C,UPF1,ZNF652,NONO,NIPBL,ANKRD12,KIF7,KIF3A,UBTF,RSF1,FKBP1A,RIF1,GCC2,OLA1,CTNNBL1,PPIA,POLD1,CCDC137,COMMD4,YWHAQ,MTX3,PTRHD1,METTL16,NASP,PEX2,MBD3,ELOC,RNF139,CEP131,NFKBIL1,PPP2CA,CNOT7,RAN,EDF1,RRBP1,PURA,RPL15,AXIN1,GRIP…
TF	Factor: Pet-1; motif: GCNGGAAGYG; match class: 1	TF:M09918_1	0.0002575129270446277	3.5892009646684877	7213	255	126	19917	APOC2,SUPT4H1,MAGED4,BCKDHA,GOLGA4,CNIH1,GOLGA3,ALMS1,SMG1,KCMF1,CCDC88B,KIAA0232,SLC38A10,FKBP2,GTF2A2,ZNF638,N4BP2,ZBTB37,LYPLA1,SNRPG,UPF1,ZNF652,RBM6,NONO,NIPBL,MMADHC,UBTF,RSF1,FKBP1A,GAK,RIF1,CRTAP,TCEAL4,PPIA,RPL23A,TIMM8B,CCDC137,MTX3,PNISR,METTL16,NASP,CHD2,PEX2,ELOC,ZNF221,CEP131,NFKBIL1,PURA,PSMC5,AXIN1,ARFRP1,MOB1B,RER1,EIF3CL,CDK11B,GOLGB1,DAPK3,DAZAP1,CCDC9,RPL10A,MINDY2,C3ORF38,CCD…
TF	Factor: Elk-1:T-bet; motif: TCACACCGGAAGNN	TF:M08231	0.0002631543084335452	3.579789515201722	6702	255	119	19917	APOC2,SUPT4H1,MAGED4,SELENOT,DMAC1,GOLGA4,INO80D,GOLGA3,ALMS1,SMG1,HDGFL2,KCMF1,RPS14,SLC38A10,FKBP2,GTF2A2,ZNF638,ZNF207,SREK1,SCYL1,N4BP2,LYPLA1,ATP5MG,NDUFS7,SNRPG,COX7C,RBM6,NIPBL,KIF7,MMADHC,FKBP1A,KIAA1109,RIF1,RPL23A,POLD1,TIMM8B,CCDC137,COMMD4,PNISR,NASP,PEX2,ELOC,ZNF221,SREK1IP1,RNF139,CNOT7,SURF6,RPL15,UBXN7,POLR2J3,SAMD8,HTATSF1,RER1,EIF3CL,CDK11B,DAPK3,DAZAP1,CCDC9,RPL10A,MINDY2,INTS1…
TF	Factor: IRX-1; motif: NACRYNNNNNNNNRYGNN	TF:M11018	0.0002631543084335452	3.579789515201722	17131	255	241	19917	RPL41,UQCRHL,LSM8,APOC2,SUPT4H1,MAGED4,SELENOT,BCKDHA,DMAC1,GOLGA4,INO80D,SAFB2,CNIH1,GOLGA3,ALMS1,SMG1,HDGFL2,SAFB,KCMF1,POTEE,RPS14,CCDC88B,KIAA0232,SLC38A10,FKBP2,GTF2A2,ZNF627,ZNF638,ZNF207,SREK1,SCYL1,N4BP2,ZBTB37,CEP250,LYPLA1,ANKRD36C,ATP5MG,NUMA1,NDUFS7,SNRPG,COX7C,UPF1,ZNF652,RBM6,ZNF37A,NONO,NIPBL,RANBP2,TCEAL3,ANKRD12,KRI1,KIF7,KIF3A,CSNK2A3,MMADHC,UBTF,MVD,RSF1,FKBP1A,CNIH4,GAK,KIAA11…
TF	Factor: ER71:Pax-5; motif: ACCGGAACYACGCWTSANTG; match class: 1	TF:M08266_1	0.00028727406308433616	3.5417035830851127	9053	255	150	19917	RPL41,LSM8,APOC2,SUPT4H1,MAGED4,SELENOT,BCKDHA,DMAC1,GOLGA4,CNIH1,GOLGA3,ALMS1,SMG1,HDGFL2,KCMF1,RPS14,CCDC88B,KIAA0232,FKBP2,SCYL1,ZBTB37,LYPLA1,ANKRD36C,ATP5MG,NUMA1,NDUFS7,UPF1,RBM6,NIPBL,RANBP2,TCEAL3,ANKRD12,KIF7,KIF3A,UBTF,RSF1,FKBP1A,KIAA1109,CRTAP,LUC7L,GCC2,CTNNBL1,PPIA,RPL23A,TIMM8B,CCDC137,COMMD4,NDUFC2,MTX3,PNISR,PTRHD1,PEX2,ELOC,ZNF221,SREK1IP1,RNF139,PPP2CA,ANKS3,CNOT7,RAN,PURA,RPL1…
TF	Factor: YY1; motif: NNNNAARATGGNNNN	TF:M07370	0.0002988609859921285	3.5245307750718395	5854	255	107	19917	RPL41,LSM8,SUPT4H1,BCKDHA,GOLGA4,SAFB2,SAFB,ZNF627,ZNF638,ZNF207,SREK1,CEP250,ATP5MG,NUMA1,NDUFS7,COX7C,UPF1,NONO,RANBP2,TCEAL3,ANKRD12,KRI1,CSNK2A3,MMADHC,UBTF,RSF1,RIF1,OLA1,TCEAL4,PPIA,RPL23A,CCDC137,MTX3,PNISR,PTRHD1,METTL16,NASP,CHD2,SREK1IP1,RNF139,CEP131,PPP2CA,RAN,PSMC5,RPL15,GRIPAP1,UBXN7,HTATSF1,RER1,PELP1,MACF1,EIF2S3B,FAM71D,PCBP2,ARHGAP4,TBL3,PSENEN,UBN2,WDR46,CASP8AP2,BDP1,KIF5B,SMG…
TF	Factor: Sp1; motif: NNGGGGCGGGGNN	TF:M00932	0.00029998786565725534	3.522896311895924	10490	255	168	19917	RPL41,SUPT4H1,MAGED4,DMAC1,GOLGA4,INO80D,GOLGA3,ALMS1,SMG1,HDGFL2,KCMF1,POTEE,CCDC88B,KIAA0232,SLC38A10,FKBP2,GTF2A2,ZNF627,SREK1,SCYL1,ZBTB37,CEP250,LYPLA1,ANKRD36C,NUMA1,COX7C,UPF1,ZNF652,RBM6,ZNF37A,NONO,NIPBL,TCEAL3,ANKRD12,KRI1,KIF7,KIF3A,UBTF,MVD,RSF1,KIAA1109,RIF1,CRTAP,GCC2,OLA1,CTNNBL1,PPIA,POLD1,CCDC137,COMMD4,NDUFC2,YWHAQ,MTX3,PTRHD1,NASP,FAM50A,MBD3,RNF139,CEP131,NFKBIL1,PPP2CA,CNOT7,…
TF	Factor: Elk-1:Pax-9; motif: ACCGGAACYACGCWYSANTG	TF:M08226	0.0003099996427144214	3.508638806705226	12154	255	188	19917	RPL41,LSM8,APOC2,SUPT4H1,MAGED4,SELENOT,BCKDHA,GOLGA4,SAFB2,CNIH1,GOLGA3,ALMS1,SMG1,HDGFL2,SAFB,KCMF1,RPS14,CCDC88B,KIAA0232,SLC38A10,FKBP2,GTF2A2,ZNF207,SREK1,SCYL1,ZBTB37,CEP250,LYPLA1,ANKRD36C,ATP5MG,NDUFS7,SNRPG,UPF1,ZNF652,RBM6,ZNF37A,NIPBL,RANBP2,TCEAL3,ANKRD12,KRI1,KIF7,KIF3A,MMADHC,RSF1,FKBP1A,GAK,KIAA1109,RIF1,LUC7L,GCC2,OLA1,CTNNBL1,PPIA,RPL23A,POLD1,TIMM8B,CCDC137,COMMD4,NDUFC2,MTX3,PN…
TF	Factor: GABPalpha_GABPbeta; motif: CTTCCKGY; match class: 1	TF:M03791_1	0.00032400999709491184	3.4894415897434654	432	255	18	19917	SUPT4H1,FKBP2,SREK1,SNRPG,GAK,RPL23A,PEX2,AXIN1,ZNF707,ZNF646,EWSR1,ASB1,PPAN,STK19,FUNDC2,DMAP1,ANTKMT,DPP8
TF	Factor: E2F-1; motif: NTTTTGGCGCCAWWWN; match class: 1	TF:M11533_1	0.0003618846236404625	3.4414298695305603	8777	255	146	19917	RPL41,LSM8,SELENOT,BCKDHA,INO80D,SAFB2,GOLGA3,ALMS1,SMG1,HDGFL2,SAFB,POTEE,RPS14,CCDC88B,SLC38A10,FKBP2,GTF2A2,ZNF638,ZNF207,SREK1,SCYL1,N4BP2,ZBTB37,CEP250,LYPLA1,ANKRD36C,ATP5MG,NUMA1,NDUFS7,UPF1,RANBP2,TCEAL3,KRI1,KIF7,UBTF,MVD,GAK,RIF1,CRTAP,LUC7L,GCC2,OLA1,TCEAL4,PPIA,RPL23A,POLD1,TIMM8B,COMMD4,PNISR,TTBK2,NASP,PEX2,FAM50A,MBD3,SREK1IP1,CEP131,PPP2CA,CNOT7,EDF1,PURA,PSMC5,RPL15,POLR2J3,HTATS…
TF	Factor: ER71; motif: NACCGGAARTN	TF:M11413	0.00037417407070011136	3.4269263112829083	2122	255	50	19917	SUPT4H1,GOLGA3,RPS14,SLC38A10,FKBP2,GTF2A2,N4BP2,ZBTB37,NIPBL,GAK,RPL23A,TIMM8B,MTX3,PNISR,NASP,PEX2,ZNF221,CEP131,AXIN1,ARFRP1,EIF3CL,DAPK3,CCDC9,MINDY2,INTS1,C3ORF38,PSENEN,PAXX,ZGPAT,WDR46,TIMM13,SSR3,ZNF646,RBM15,ASB1,PPAN,CMC4,HYPK,ZBTB17,STK19,PAF1,TSR3,DMAP1,FAM199X,MAGEF1,ANTKMT,DPP8,ZSWIM9,CREBZF,RPA3
TF	Factor: E2F-1:TBR2; motif: NGGTGNNANGGCGCNNTNNCRNNN	TF:M08523	0.00037417407070011136	3.4269263112829083	12268	255	189	19917	RPL41,UQCRHL,SUPT4H1,MAGED4,SELENOT,DMAC1,GOLGA4,INO80D,SAFB2,CNIH1,GOLGA3,ALMS1,SMG1,SAFB,KCMF1,KIAA0232,SLC38A10,FKBP2,GTF2A2,ZNF627,ZNF638,ZNF207,SREK1,SCYL1,N4BP2,ZBTB37,CEP250,LYPLA1,ANKRD36C,ATP5MG,NUMA1,NDUFS7,SNRPG,COX7C,UPF1,ZNF652,RBM6,ZNF37A,NONO,RANBP2,TCEAL3,ANKRD12,KRI1,UBTF,MVD,FKBP1A,CNIH4,RIF1,CRTAP,LUC7L,CTNNBL1,PPIA,RPL23A,POLD1,CCDC137,COMMD4,NDUFC2,YWHAQ,PNISR,PTRHD1,TTBK2,ME…
TF	Factor: ETF; motif: CCCCGCCCCYN	TF:M07039	0.00037417407070011136	3.4269263112829083	16527	255	235	19917	LSM8,APOC2,SUPT4H1,MAGED4,SELENOT,BCKDHA,DMAC1,GOLGA4,INO80D,SAFB2,CNIH1,GOLGA3,ALMS1,SMG1,HDGFL2,SAFB,KCMF1,POTEE,RPS14,CCDC88B,KIAA0232,SLC38A10,FKBP2,GTF2A2,ZNF627,ZNF638,ZNF207,SREK1,SCYL1,N4BP2,ZBTB37,CEP250,LYPLA1,ANKRD36C,ATP5MG,NUMA1,NDUFS7,COX7C,UPF1,ZNF652,RBM6,ZNF37A,NONO,NIPBL,RANBP2,TCEAL3,ANKRD12,KRI1,KIF7,KIF3A,MMADHC,UBTF,MVD,RSF1,FKBP1A,CNIH4,GAK,KIAA1109,RIF1,CRTAP,LUC7L,GCC2,OL…
TF	Factor: Pax-3; motif: TCGTCACRCTTHM	TF:M00360	0.00040774633364427845	3.3896099353403346	12366	255	190	19917	RPL41,LSM8,APOC2,SUPT4H1,MAGED4,SELENOT,BCKDHA,DMAC1,GOLGA4,INO80D,SAFB2,CNIH1,GOLGA3,ALMS1,SMG1,SAFB,KCMF1,POTEE,RPS14,CCDC88B,KIAA0232,FKBP2,GTF2A2,ZNF627,ZNF638,ZNF207,SREK1,N4BP2,CEP250,LYPLA1,ANKRD36C,NUMA1,NDUFS7,SNRPG,COX7C,UPF1,ZNF652,NONO,NIPBL,RANBP2,ANKRD12,KRI1,KIF7,KIF3A,CSNK2A3,UBTF,MVD,RSF1,FKBP1A,CNIH4,KIAA1109,RIF1,CRTAP,LUC7L,GCC2,OLA1,TCEAL4,CTNNBL1,PPIA,TIMM8B,CCDC137,NDUFC2,Y…
TF	Factor: sp4; motif: NNNGCYCCGCCCCCY	TF:M10530	0.0004937386740580797	3.3065028535943326	8285	255	139	19917	SUPT4H1,MAGED4,DMAC1,INO80D,SAFB2,GOLGA3,SMG1,HDGFL2,SAFB,KCMF1,POTEE,RPS14,CCDC88B,KIAA0232,SLC38A10,FKBP2,ZNF627,ZNF207,SREK1,SCYL1,ZBTB37,CEP250,LYPLA1,NUMA1,SNRPG,COX7C,UPF1,ZNF652,RBM6,NONO,ANKRD12,KRI1,KIF7,KIF3A,UBTF,MVD,RSF1,RIF1,CRTAP,OLA1,TCEAL4,CTNNBL1,PPIA,RPL23A,POLD1,CCDC137,COMMD4,YWHAQ,MTX3,PTRHD1,TTBK2,NASP,FAM50A,MBD3,ZNF221,RNF139,CEP131,NFKBIL1,CNOT7,SURF6,RAN,RRBP1,AXIN1,UBXN…
TF	Factor: GKLF; motif: NNCCMCRCCCN	TF:M12173	0.0005129546279935052	3.289921047526577	10088	255	162	19917	RPL41,UQCRHL,APOC2,SUPT4H1,MAGED4,DMAC1,GOLGA4,INO80D,GOLGA3,ALMS1,SMG1,HDGFL2,KCMF1,POTEE,CCDC88B,KIAA0232,SLC38A10,FKBP2,GTF2A2,ZNF627,SCYL1,CEP250,LYPLA1,ANKRD36C,NUMA1,ZNF652,RBM6,ZNF37A,NONO,NIPBL,RANBP2,ANKRD12,KRI1,KIF7,KIF3A,UBTF,MVD,RSF1,FKBP1A,CNIH4,GAK,RIF1,CRTAP,LUC7L,OLA1,TCEAL4,PPIA,RPL23A,POLD1,CCDC137,COMMD4,NDUFC2,YWHAQ,MTX3,TTC3,PTRHD1,METTL16,NASP,FAM50A,MBD3,ELOC,ZNF221,CEP131…
TF	Factor: TIEG1; motif: NCCCNSNCCCCGCCCCC	TF:M12351	0.0005233926032316713	3.281172419255114	12403	255	190	19917	LSM8,APOC2,SUPT4H1,MAGED4,SELENOT,BCKDHA,DMAC1,GOLGA4,INO80D,SAFB2,GOLGA3,SMG1,HDGFL2,SAFB,KCMF1,POTEE,RPS14,CCDC88B,KIAA0232,SLC38A10,FKBP2,ZNF627,ZNF638,SREK1,SCYL1,N4BP2,ZBTB37,CEP250,LYPLA1,ANKRD36C,NUMA1,COX7C,ZNF652,RBM6,NONO,NIPBL,ANKRD12,KRI1,KIF7,UBTF,MVD,RSF1,FKBP1A,KIAA1109,RIF1,CRTAP,GCC2,OLA1,TCEAL4,CTNNBL1,PPIA,POLD1,CCDC137,COMMD4,NDUFC2,YWHAQ,MTX3,PNISR,PTRHD1,TTBK2,METTL16,NASP,C…
TF	Factor: TCF-1; motif: ACATCGRGRCGCTGW; match class: 1	TF:M11601_1	0.0005468562670810547	3.262126806420211	11153	255	175	19917	LSM8,SUPT4H1,MAGED4,SELENOT,GOLGA4,INO80D,SAFB2,GOLGA3,SMG1,HDGFL2,SAFB,KCMF1,CCDC88B,KIAA0232,SLC38A10,FKBP2,GTF2A2,SREK1,SCYL1,N4BP2,ZBTB37,ANKRD36C,UPF1,ZNF652,RBM6,ZNF37A,NONO,NIPBL,RANBP2,ANKRD12,KRI1,KIF7,MMADHC,UBTF,MVD,RSF1,FKBP1A,CNIH4,GAK,KIAA1109,RIF1,CRTAP,LUC7L,GCC2,CTNNBL1,PPIA,POLD1,CCDC137,NDUFC2,YWHAQ,MTX3,TTBK2,NASP,FAM50A,MBD3,ELOC,RNF139,CEP131,NFKBIL1,PPP2CA,CNOT7,RAN,EDF1,RR…
TF	Factor: BTEB2; motif: RGGGNGKGGN	TF:M07277	0.000578454109160014	3.2377310894851266	8539	255	142	19917	RPL41,SUPT4H1,MAGED4,DMAC1,INO80D,GOLGA3,SMG1,HDGFL2,KCMF1,POTEE,KIAA0232,SLC38A10,FKBP2,ZNF627,SREK1,SCYL1,N4BP2,CEP250,LYPLA1,ANKRD36C,NUMA1,COX7C,ZNF652,RBM6,ZNF37A,NONO,ANKRD12,KRI1,KIF7,KIF3A,UBTF,MVD,RSF1,RIF1,CRTAP,OLA1,CTNNBL1,PPIA,RPL23A,POLD1,CCDC137,COMMD4,YWHAQ,MTX3,PTRHD1,NASP,FAM50A,MBD3,RNF139,CEP131,NFKBIL1,CNOT7,SURF6,RAN,EDF1,RRBP1,PURA,AXIN1,UBXN7,POLR2J3,SAMD8,HTATSF1,ARFRP1,M…
TF	Factor: YY2; motif: NNCCGCCATTW	TF:M08020	0.0006026693553980032	3.2199208910273676	1354	255	36	19917	SAFB2,HDGFL2,SAFB,ZNF638,COX7C,NONO,MMADHC,FKBP1A,TCEAL4,TIMM8B,RNF139,PPP2CA,PSMC5,RPL15,HTATSF1,EIF3CL,PELP1,CCDC9,C3ORF38,CFAP410,DNAJC5,CFL2,SCAPER,SSR3,TLR1,DHX38,DDX54,DOHH,ATAD2B,ZNF721,DAZ1,USP34,CKLF,TBCA,RSRC2,MORC2
TF	Factor: ELF4; motif: NCCGGAARTN; match class: 1	TF:M02056_1	0.0006066777049560963	3.2170419648259436	1300	255	35	19917	RPL41,GOLGA3,SLC38A10,FKBP2,GTF2A2,ATP5MG,COX7C,NIPBL,FKBP1A,PPIA,RPL23A,CCDC137,MTX3,PEX2,PSMC5,RPL15,RER1,CCDC9,C3ORF38,UBN2,BMS1,RESF1,RPS3A,WDR46,TIMM13,ZNF646,UBXN1,ASB1,C6ORF47,THRAP3,DMAP1,FCHSD2,SLX1A,NSMCE2,RPA3
TF	Factor: YY1; motif: NAANATGGCGNNN	TF:M08982	0.0006066777049560963	3.2170419648259436	7188	255	124	19917	RPL41,SUPT4H1,BCKDHA,GOLGA4,SAFB2,SAFB,FKBP2,ZNF627,ZNF638,ZNF207,SREK1,ZBTB37,CEP250,LYPLA1,ATP5MG,NUMA1,NDUFS7,SNRPG,COX7C,NONO,RANBP2,ANKRD12,KRI1,CSNK2A3,MMADHC,RSF1,GAK,RIF1,TCEAL4,PPIA,RPL23A,TIMM8B,CCDC137,COMMD4,MTX3,PNISR,TTC3,PTRHD1,METTL16,NASP,CHD2,ZNF221,SREK1IP1,RNF139,NFKBIL1,PPP2CA,SURF6,RAN,RRBP1,PSMC5,RPL15,GRIPAP1,UBXN7,POLR2J3,HTATSF1,RER1,EIF3CL,CDK11B,PELP1,CCDC9,TELO2,EIF2S…
TF	Factor: CNOT3; motif: GGCCGCGSSS	TF:M01253	0.0006264361373656931	3.2031231969816853	3948	255	78	19917	SELENOT,INO80D,SAFB2,CNIH1,GOLGA3,SMG1,HDGFL2,SAFB,KCMF1,GTF2A2,N4BP2,LYPLA1,NDUFS7,ZNF37A,NIPBL,RANBP2,ANKRD12,KIF3A,UBTF,MVD,OLA1,PPIA,NDUFC2,YWHAQ,NASP,MBD3,RNF139,PPP2CA,RAN,RRBP1,AXIN1,HTATSF1,ARFRP1,RER1,CCDC9,RPL10A,TELO2,MINDY2,ARHGAP4,PAXX,TAF10,RESF1,RPS3A,ZGPAT,TBCD,HNRNPLL,SMG6,HELZ,SNRNP70,AKAP13,ATP5F1E,CANX,GRINA,ASB1,DDX54,CMC4,ENGASE,LUC7L3,PTPN11,BTG1,HDAC4,TMEM241,TSR3,LNPEP,FU…
TF	Factor: E2F-1; motif: TTTSGCGCGMNR	TF:M00516	0.0006264361373656931	3.2031231969816853	6972	255	121	19917	RPL41,LSM8,MAGED4,SELENOT,BCKDHA,DMAC1,GOLGA4,GOLGA3,SMG1,HDGFL2,POTEE,RPS14,CCDC88B,KIAA0232,SLC38A10,ZNF638,ZNF207,N4BP2,CEP250,LYPLA1,ATP5MG,NUMA1,NDUFS7,COX7C,UPF1,NIPBL,RANBP2,KIF7,MMADHC,KIAA1109,RIF1,LUC7L,PPIA,RPL23A,COMMD4,NDUFC2,YWHAQ,PNISR,PTRHD1,TTBK2,METTL16,NASP,PEX2,CEP131,PPP2CA,CNOT7,SURF6,PURA,PSMC5,RPL15,UBXN7,HTATSF1,ARFRP1,MOB1B,EIF3CL,CDK11B,PELP1,DAPK3,DAZAP1,RPL10A,TELO2,M…
TF	Factor: E2F-1:DP-1; motif: TTTCSCGC; match class: 1	TF:M00736_1	0.0006321731363843231	3.1991639630486888	4694	255	89	19917	LSM8,SAFB2,ALMS1,HDGFL2,SAFB,KCMF1,POTEE,FKBP2,ZNF638,SREK1,N4BP2,CEP250,NUMA1,ZNF37A,NIPBL,ANKRD12,KIF7,UBTF,RIF1,PPIA,RPL23A,YWHAQ,PTRHD1,TTBK2,METTL16,NASP,MBD3,SREK1IP1,NFKBIL1,PPP2CA,CNOT7,PSMC5,RPL15,POLR2J3,SAMD8,HTATSF1,RER1,EIF3CL,CDK11B,PELP1,DAZAP1,RPL10A,TELO2,MINDY2,INTS1,UBN2,TIMM13,CASP8AP2,SDHAF4,RAB8A,TBCD,HNRNPLL,CFAP410,KIF5B,SUGP2,DNAJC5,CFL2,SCAPER,CEP192,SRPRB,RNF2,SNRNP70,Z…
TF	Factor: SAP-1; motif: NRCCGGAWGYN; match class: 1	TF:M11437_1	0.0006445191294914052	3.1907641881487963	457	255	18	19917	GOLGA3,RPS14,FKBP2,GTF2A2,GAK,AXIN1,ARFRP1,PAXX,ZGPAT,WDR46,TIMM13,ZNF646,ASB1,PPAN,STK19,DMAP1,ANTKMT,RPA3
TF	Factor: LKLF; motif: NGGGCGG	TF:M05499	0.0006596824903356704	3.180665043055392	7952	255	134	19917	UQCRHL,SUPT4H1,MAGED4,SELENOT,BCKDHA,DMAC1,INO80D,SAFB2,GOLGA3,ALMS1,SMG1,HDGFL2,SAFB,CCDC88B,SLC38A10,FKBP2,GTF2A2,SREK1,N4BP2,NUMA1,NDUFS7,ZNF652,NIPBL,RANBP2,ANKRD12,KRI1,MMADHC,UBTF,MVD,RSF1,FKBP1A,GAK,KIAA1109,RIF1,LUC7L,GCC2,OLA1,TCEAL4,PPIA,CCDC137,NDUFC2,YWHAQ,MTX3,NASP,MBD3,RNF139,CEP131,ANKS3,CNOT7,SURF6,RAN,EDF1,RRBP1,PURA,PSMC5,AXIN1,HTATSF1,CDK11B,PELP1,GOLGB1,DAPK3,DAZAP1,CCDC9,TELO…
TF	Factor: KLF17; motif: NGGGCGG	TF:M05386	0.0006596824903356704	3.180665043055392	7952	255	134	19917	UQCRHL,SUPT4H1,MAGED4,SELENOT,BCKDHA,DMAC1,INO80D,SAFB2,GOLGA3,ALMS1,SMG1,HDGFL2,SAFB,CCDC88B,SLC38A10,FKBP2,GTF2A2,SREK1,N4BP2,NUMA1,NDUFS7,ZNF652,NIPBL,RANBP2,ANKRD12,KRI1,MMADHC,UBTF,MVD,RSF1,FKBP1A,GAK,KIAA1109,RIF1,LUC7L,GCC2,OLA1,TCEAL4,PPIA,CCDC137,NDUFC2,YWHAQ,MTX3,NASP,MBD3,RNF139,CEP131,ANKS3,CNOT7,SURF6,RAN,EDF1,RRBP1,PURA,PSMC5,AXIN1,HTATSF1,CDK11B,PELP1,GOLGB1,DAPK3,DAZAP1,CCDC9,TELO…
TF	Factor: E2F-1:HES-7; motif: GGCRCGTGSYNNWNGGCGCSM; match class: 1	TF:M08525_1	0.0006688396398041907	3.1746779956795863	15410	255	223	19917	RPL41,UQCRHL,SUPT4H1,MAGED4,SELENOT,BCKDHA,DMAC1,GOLGA4,INO80D,SAFB2,CNIH1,GOLGA3,ALMS1,SMG1,HDGFL2,SAFB,KCMF1,POTEE,KIAA0232,SLC38A10,FKBP2,GTF2A2,ZNF627,ZNF638,ZNF207,SREK1,SCYL1,N4BP2,ZBTB37,CEP250,LYPLA1,ANKRD36C,ATP5MG,NUMA1,NDUFS7,SNRPG,COX7C,UPF1,ZNF652,RBM6,ZNF37A,NONO,NIPBL,RANBP2,TCEAL3,ANKRD12,KRI1,KIF7,KIF3A,UBTF,MVD,RSF1,FKBP1A,CNIH4,GAK,RIF1,CRTAP,LUC7L,OLA1,TCEAL4,CTNNBL1,PPIA,RPL2…
TF	Factor: GABP-alpha; motif: AACCGGAAR; match class: 1	TF:M04748_1	0.0007252793243758178	3.1394947028463718	10467	255	166	19917	RPL41,LSM8,MAGED4,SELENOT,BCKDHA,DMAC1,GOLGA4,SAFB2,CNIH1,GOLGA3,ALMS1,SMG1,SAFB,POTEE,SLC38A10,FKBP2,GTF2A2,ZNF627,ZNF638,ZNF207,SREK1,N4BP2,CEP250,LYPLA1,ANKRD36C,ATP5MG,NUMA1,NDUFS7,SNRPG,UPF1,ZNF652,RBM6,ZNF37A,NONO,TCEAL3,KRI1,KIF3A,MMADHC,UBTF,MVD,RSF1,GAK,KIAA1109,RIF1,LUC7L,GCC2,OLA1,TCEAL4,PPIA,RPL23A,TIMM8B,CCDC137,COMMD4,NDUFC2,YWHAQ,PNISR,PTRHD1,TTBK2,METTL16,PEX2,FAM50A,ELOC,SREK1IP1…
TF	Factor: Elf-1; motif: NANGCGGAAGTR; match class: 1	TF:M11452_1	0.0007350758605388599	3.13366783899289	1709	255	42	19917	RPL41,GOLGA4,GOLGA3,RPS14,SLC38A10,FKBP2,GTF2A2,SREK1,COX7C,NIPBL,GAK,GCC2,OLA1,PPIA,CCDC137,PEX2,ELOC,CEP131,NFKBIL1,PSMC5,AXIN1,RER1,ZNF707,INTS1,C3ORF38,TBL3,PSENEN,BMS1,PAXX,WDR46,RNF2,ZNF646,ATP5F1E,DHX38,ASB1,ATAD2B,ZNF721,DMAP1,SLX1A,DPP8,ZSWIM9,RPA3
TF	Factor: ER81; motif: NNCCGGAAGYG; match class: 1	TF:M09913_1	0.0007535340144880628	3.1228971388754876	420	255	17	19917	SUPT4H1,FKBP2,GTF2A2,GAK,NASP,AXIN1,ARFRP1,ZGPAT,TIMM13,ZNF646,ASB1,PPAN,HYPK,DMAP1,ANTKMT,DPP8,RPA3
TF	Factor: YY1; motif: GGCSGCCATTTTGN	TF:M12273	0.0007602807289764953	3.1190260175432836	6272	255	111	19917	RPL41,UQCRHL,LSM8,SUPT4H1,SELENOT,BCKDHA,SAFB2,ALMS1,SAFB,ZNF638,ZNF207,SREK1,CEP250,ATP5MG,NUMA1,NDUFS7,COX7C,NONO,RANBP2,ANKRD12,KRI1,CSNK2A3,MMADHC,RSF1,CNIH4,RIF1,TCEAL4,PPIA,RPL23A,CCDC137,YWHAQ,MTX3,PNISR,TTC3,PTRHD1,METTL16,NASP,CHD2,SREK1IP1,RNF139,CEP131,PPP2CA,RAN,PSMC5,RPL15,GRIPAP1,UBXN7,HTATSF1,RER1,EIF3CL,CDK11B,PELP1,MACF1,EIF2S3B,FAM71D,PCBP2,ARHGAP4,TBL3,PSENEN,EIF3A,UBN2,WDR46,C…
TF	Factor: Elf-1; motif: RANSMGGAAGTR	TF:M11446	0.0008215574342317264	3.0853620700889217	2937	255	62	19917	RPL41,APOC2,SUPT4H1,BCKDHA,DMAC1,RPS14,CCDC88B,SLC38A10,GTF2A2,ZBTB37,ATP5MG,SNRPG,ZNF37A,NONO,NIPBL,KIF3A,GAK,GCC2,RPL23A,TIMM8B,CCDC137,PNISR,PTRHD1,NASP,PEX2,ELOC,CEP131,RRBP1,PSMC5,RPL15,MOB1B,RER1,CDK11B,DAZAP1,CCDC9,C3ORF38,ARHGAP4,UBN2,BMS1,RPS3A,WDR46,TIMM13,SSR3,ZNF646,UBXN1,SLC25A5,DHX38,CMC4,PTPN11,ZNF721,BTG1,TSR3,ARHGAP45,DMAP1,SLX1A,DPP8,ZSWIM9,KCNS3,CAPZA1,CCZ1B,CREBZF,RPA3
TF	Factor: HOXB2:Elk-1; motif: TAATKRCCGGAAGTN; match class: 1	TF:M08341_1	0.0008460513387167841	3.0726032830071643	1324	255	35	19917	APOC2,SUPT4H1,GOLGA3,HDGFL2,SLC38A10,GTF2A2,ZBTB37,NIPBL,ANKRD12,MMADHC,GAK,KIAA1109,NASP,PEX2,RER1,EIF3CL,ZNF707,BMS1,RPS3A,WDR46,SRPRB,ZNF646,ATRAID,RBM15,DHX38,SSB,PPAN,CMC4,HYPK,DAZ1,DMAP1,DPP8,ZSWIM9,MRFAP1,CREBZF
TF	Factor: Zbtb37; motif: NYACCGCRNTCACCGCR	TF:M12345	0.0008901344892455843	3.0505443714173106	5578	255	101	19917	RPL41,MAGED4,SAFB2,CNIH1,GOLGA3,ALMS1,SMG1,HDGFL2,SAFB,KCMF1,SLC38A10,GTF2A2,ZNF638,N4BP2,ZBTB37,ANKRD36C,UPF1,RBM6,NIPBL,KRI1,KIF3A,UBTF,GAK,KIAA1109,LUC7L,GCC2,OLA1,CTNNBL1,PPIA,CCDC137,NASP,PEX2,FAM50A,MBD3,ELOC,RNF139,ANKS3,CNOT7,RAN,EDF1,RRBP1,PURA,PSMC5,AXIN1,UBXN7,POLR2J3,SAMD8,HTATSF1,ARFRP1,RER1,PELP1,DAPK3,DAZAP1,RPL10A,INTS1,C3ORF38,TBL3,PSENEN,UBN2,TAF10,ZGPAT,TBCD,UBE2D2,HNRNPLL,SMG6…
TF	Factor: E2F-3:FOXI1; motif: NGACACCGCGCCCAC; match class: 1	TF:M08208_1	0.0008954017656727383	3.047982053551891	7175	255	123	19917	RPL41,UQCRHL,SELENOT,DMAC1,SAFB2,ALMS1,SMG1,SAFB,KCMF1,POTEE,KIAA0232,FKBP2,GTF2A2,ZNF627,ZNF638,ZNF207,SREK1,SCYL1,ZBTB37,ANKRD36C,NUMA1,NDUFS7,UPF1,RBM6,ZNF37A,RANBP2,ANKRD12,UBTF,MVD,GAK,RIF1,OLA1,PPIA,RPL23A,POLD1,NDUFC2,PNISR,PTRHD1,METTL16,NASP,MBD3,ZNF221,PPP2CA,ANKS3,SURF6,RAN,EDF1,RRBP1,PSMC5,AXIN1,UBXN7,POLR2J3,SAMD8,HTATSF1,ARFRP1,EIF3CL,CDK11B,PELP1,ZNF707,DAPK3,CCDC9,TELO2,MINDY2,C3O…
TF	Factor: E2F-4; motif: GCGGGAAANA	TF:M02090	0.0008967926994272907	3.047307935885148	12068	255	185	19917	RPL41,LSM8,SUPT4H1,MAGED4,DMAC1,INO80D,SAFB2,GOLGA3,SMG1,HDGFL2,SAFB,KCMF1,RPS14,CCDC88B,KIAA0232,GTF2A2,ZNF627,ZNF207,SREK1,SCYL1,N4BP2,ZBTB37,ANKRD36C,ATP5MG,NUMA1,NDUFS7,UPF1,RBM6,NIPBL,RANBP2,ANKRD12,KRI1,KIF7,KIF3A,CSNK2A3,UBTF,MVD,RSF1,CNIH4,KIAA1109,RIF1,LUC7L,GCC2,OLA1,CTNNBL1,PPIA,RPL23A,POLD1,TIMM8B,CCDC137,COMMD4,YWHAQ,MTX3,METTL16,NASP,PEX2,FAM50A,MBD3,ELOC,ZNF221,SREK1IP1,RNF139,CEP1…
TF	Factor: SP2; motif: GNNGGGGGCGGGGSN	TF:M03807	0.0009079824895442546	3.0419225267736656	8460	255	140	19917	SUPT4H1,MAGED4,DMAC1,INO80D,GOLGA3,ALMS1,SMG1,HDGFL2,KCMF1,POTEE,RPS14,CCDC88B,KIAA0232,SLC38A10,FKBP2,GTF2A2,ZNF627,SCYL1,ZBTB37,CEP250,LYPLA1,ANKRD36C,NUMA1,COX7C,ZNF652,RBM6,NONO,NIPBL,ANKRD12,KRI1,KIF7,KIF3A,UBTF,MVD,RSF1,RIF1,CRTAP,GCC2,OLA1,PPIA,POLD1,COMMD4,YWHAQ,MTX3,PTRHD1,NASP,FAM50A,MBD3,RNF139,CEP131,NFKBIL1,CNOT7,SURF6,RAN,EDF1,RRBP1,AXIN1,UBXN7,POLR2J3,SAMD8,HTATSF1,MOB1B,RER1,EIF3C…
TF	Factor: Elk-1:SREBP-2; motif: RTCACGTGACCGGAAGN	TF:M08229	0.0009623758556503386	3.016655281230723	9636	255	155	19917	UQCRHL,APOC2,MAGED4,BCKDHA,SAFB2,CNIH1,GOLGA3,SAFB,KCMF1,RPS14,CCDC88B,KIAA0232,SLC38A10,FKBP2,GTF2A2,ZNF638,ZNF207,SREK1,SCYL1,N4BP2,ZBTB37,ANKRD36C,ATP5MG,SNRPG,COX7C,UPF1,RBM6,ZNF37A,NONO,RANBP2,KRI1,UBTF,RSF1,FKBP1A,CNIH4,GAK,KIAA1109,GCC2,TCEAL4,RPL23A,POLD1,TIMM8B,COMMD4,NDUFC2,TTC3,METTL16,NASP,CHD2,PEX2,MBD3,ZNF221,SREK1IP1,CEP131,NFKBIL1,PPP2CA,ANKS3,SURF6,EDF1,RRBP1,PURA,PSMC5,UBXN7,ARF…
TF	Factor: E2F-1; motif: TWSGCGCGAAAAYKR	TF:M00024	0.0009842966178096584	3.0068740071924975	9014	255	147	19917	RPL41,LSM8,APOC2,SUPT4H1,MAGED4,SELENOT,INO80D,CNIH1,SMG1,SAFB,KCMF1,RPS14,SLC38A10,FKBP2,ZNF627,ZNF638,ZNF207,SREK1,N4BP2,ZBTB37,CEP250,ATP5MG,NUMA1,NDUFS7,SNRPG,COX7C,UPF1,NONO,TCEAL3,KRI1,CSNK2A3,UBTF,RSF1,FKBP1A,RIF1,TCEAL4,RPL23A,POLD1,NDUFC2,YWHAQ,MTX3,PNISR,PTRHD1,METTL16,NASP,CHD2,FAM50A,MBD3,ZNF221,SREK1IP1,NFKBIL1,PPP2CA,ANKS3,CNOT7,PURA,RPL15,AXIN1,POLR2J3,HTATSF1,ARFRP1,RER1,EIF3CL,CD…
TF	Factor: E2F-1; motif: NNNNGGCGGGAARN; match class: 1	TF:M09892_1	0.0009842966178096584	3.0068740071924975	9248	255	150	19917	LSM8,SUPT4H1,MAGED4,DMAC1,INO80D,SAFB2,GOLGA3,ALMS1,SMG1,HDGFL2,SAFB,KCMF1,KIAA0232,FKBP2,ZNF627,ZNF638,ZNF207,SREK1,SCYL1,N4BP2,ZBTB37,CEP250,ANKRD36C,NUMA1,NDUFS7,SNRPG,UPF1,RBM6,ZNF37A,RANBP2,ANKRD12,KRI1,KIF7,UBTF,MVD,RSF1,GAK,KIAA1109,RIF1,LUC7L,OLA1,CTNNBL1,PPIA,POLD1,CCDC137,COMMD4,YWHAQ,PTRHD1,TTBK2,NASP,FAM50A,MBD3,ELOC,CEP131,NFKBIL1,PPP2CA,RAN,EDF1,RRBP1,PURA,PSMC5,AXIN1,UBXN7,POLR2J3,…
TF	Factor: GABPalpha; motif: RCCGGAWRYN; match class: 1	TF:M02074_1	0.0009842966178096584	3.0068740071924975	1011	255	29	19917	GOLGA3,RPS14,FKBP2,GTF2A2,COX7C,FKBP1A,GAK,PPIA,RPL23A,COMMD4,MTX3,SURF6,RPL15,AXIN1,RER1,CCDC9,PAXX,WDR46,TIMM13,ZNF646,ASB1,PPAN,STK19,C6ORF47,CYTH2,DMAP1,MAGEF1,ANTKMT,RPA3
TF	Factor: GABP; motif: VCCGGAAGNGCR; match class: 1	TF:M00341_1	0.0009953722796910871	3.002014458171894	2333	255	52	19917	APOC2,SUPT4H1,MAGED4,KCMF1,SLC38A10,FKBP2,GTF2A2,ZNF638,SCYL1,ZBTB37,NIPBL,RSF1,FKBP1A,RIF1,CCDC137,NASP,SREK1IP1,NFKBIL1,PSMC5,AXIN1,POLR2J3,ARFRP1,RER1,EIF3CL,CDK11B,DAZAP1,CCDC9,ARHGAP4,TBL3,ZGPAT,TIMM13,UBE2D2,SUGP2,OSER1,ZNF646,UBXN1,CANX,SLC25A5,ZNF444,ASB1,PPAN,PTPN11,ATAD2B,TSR3,DMAP1,TBCA,ANTKMT,DPP8,ZSWIM9,RAI1,KCNS3,RPA3
TF	Factor: BEN; motif: CAGCGRNV	TF:M01240	0.0009965755903908167	3.001489754420029	16656	255	235	19917	RPL41,LSM8,APOC2,SUPT4H1,MAGED4,SELENOT,BCKDHA,DMAC1,GOLGA4,INO80D,SAFB2,CNIH1,GOLGA3,ALMS1,SMG1,HDGFL2,SAFB,KCMF1,CCDC88B,KIAA0232,SLC38A10,FKBP2,ZNF627,ZNF638,ZNF207,SREK1,SCYL1,N4BP2,ZBTB37,CEP250,LYPLA1,ANKRD36C,ATP5MG,NUMA1,NDUFS7,SNRPG,COX7C,UPF1,ZNF652,RBM6,ZNF37A,NONO,NIPBL,RANBP2,TCEAL3,ANKRD12,KRI1,KIF7,KIF3A,CSNK2A3,MMADHC,UBTF,MVD,RSF1,FKBP1A,CNIH4,GAK,RIF1,CRTAP,LUC7L,GCC2,OLA1,TCEAL…
TF	Factor: p300; motif: ACNTCCG	TF:M04826	0.001000185306668486	2.9999195297920194	17982	255	247	19917	RPL41,LSM8,APOC2,SUPT4H1,MAGED4,SELENOT,BCKDHA,DMAC1,GOLGA4,INO80D,SAFB2,CNIH1,GOLGA3,ALMS1,SMG1,HDGFL2,SAFB,KCMF1,POTEE,RPS14,CCDC88B,KIAA0232,SLC38A10,FKBP2,GTF2A2,ZNF627,ZNF638,ZNF207,SREK1,SCYL1,N4BP2,ZBTB37,CEP250,LYPLA1,ANKRD36C,ATP5MG,NUMA1,NDUFS7,SNRPG,COX7C,UPF1,ZNF652,RBM6,ZNF37A,NONO,NIPBL,RANBP2,TCEAL3,ANKRD12,KRI1,KIF7,KIF3A,CSNK2A3,MMADHC,UBTF,MVD,RSF1,FKBP1A,CNIH4,GAK,KIAA1109,RIF1…
TF	Factor: SAP-1a; motif: NACCGGAAGTV	TF:M01167	0.0010444046531701784	2.9811312019183864	1975	255	46	19917	SUPT4H1,DMAC1,FKBP2,GTF2A2,SREK1,N4BP2,SNRPG,NIPBL,MMADHC,FKBP1A,RIF1,RPL23A,TIMM8B,CCDC137,PNISR,PEX2,ZNF221,CEP131,UBXN7,SAMD8,DAPK3,CCDC9,INTS1,C3ORF38,PSENEN,PAXX,WDR46,HNRNPLL,ZNF646,EWSR1,DHX38,ASB1,PPAN,CMC4,HYPK,STK19,PAF1,TSR3,DMAP1,FAM199X,MAGEF1,ANTKMT,DPP8,ZSWIM9,SETD2,CREBZF
TF	Factor: ESE-1; motif: NWTRCGGAWGCN; match class: 1	TF:M11382_1	0.001056660206919999	2.976064647493306	4150	255	80	19917	RPL41,MAGED4,DMAC1,GOLGA4,RPS14,SLC38A10,FKBP2,GTF2A2,SREK1,N4BP2,ZBTB37,LYPLA1,NDUFS7,COX7C,UPF1,NIPBL,KIF7,MMADHC,UBTF,FKBP1A,GAK,KIAA1109,RIF1,CRTAP,GCC2,OLA1,PPIA,POLD1,TIMM8B,CCDC137,COMMD4,MTX3,PNISR,PEX2,ELOC,RNF139,CEP131,RRBP1,PSMC5,RPL15,AXIN1,ARFRP1,CDK11B,ZNF707,DAZAP1,CCDC9,INTS1,TBL3,PSENEN,PAXX,TAF10,ZGPAT,WDR46,TIMM13,HNRNPLL,SMG6,SUGP2,RNF2,ZNF646,ATP5F1E,UBXN1,DHX38,PRAME,ASB1,D…
TF	Factor: E2F; motif: TTTSGCGC	TF:M00050	0.0010601492907779547	2.9746329728524756	7130	255	122	19917	RPL41,LSM8,APOC2,SUPT4H1,MAGED4,BCKDHA,DMAC1,INO80D,GOLGA3,POTEE,RPS14,ZNF627,ZNF638,N4BP2,CEP250,ATP5MG,NUMA1,NDUFS7,COX7C,ZNF652,ZNF37A,NONO,NIPBL,RANBP2,KRI1,KIF7,KIF3A,CSNK2A3,MMADHC,CNIH4,LUC7L,OLA1,CTNNBL1,RPL23A,POLD1,TIMM8B,CCDC137,YWHAQ,MTX3,PTRHD1,TTBK2,METTL16,NASP,PEX2,MBD3,ELOC,NFKBIL1,CNOT7,SURF6,EDF1,PURA,PSMC5,RPL15,POLR2J3,HTATSF1,MOB1B,RER1,EIF3CL,CDK11B,PELP1,DAPK3,MACF1,DAZAP1…
TF	Factor: E2F-1; motif: TTTGGCGCCAAA; match class: 1	TF:M04516_1	0.0011102937073998382	2.9545621215463638	10299	255	163	19917	MAGED4,SELENOT,GOLGA4,INO80D,SAFB2,CNIH1,GOLGA3,ALMS1,SMG1,HDGFL2,SAFB,KCMF1,POTEE,CCDC88B,KIAA0232,SLC38A10,FKBP2,GTF2A2,ZNF207,SREK1,SCYL1,N4BP2,ZBTB37,CEP250,ANKRD36C,ATP5MG,NUMA1,NDUFS7,SNRPG,UPF1,ZNF652,RBM6,NIPBL,RANBP2,TCEAL3,ANKRD12,KRI1,UBTF,MVD,RSF1,GAK,RIF1,CRTAP,OLA1,PPIA,RPL23A,POLD1,CCDC137,COMMD4,YWHAQ,MTX3,PNISR,TTBK2,NASP,FAM50A,MBD3,ELOC,SREK1IP1,CEP131,PPP2CA,CNOT7,SURF6,RAN,ED…
TF	Factor: Egr-1; motif: NGCGTGCGY	TF:M04950	0.0011381543720265868	2.9437988290020516	11032	255	172	19917	UQCRHL,LSM8,APOC2,BCKDHA,GOLGA4,INO80D,SAFB2,SMG1,SAFB,KCMF1,POTEE,RPS14,KIAA0232,SLC38A10,FKBP2,GTF2A2,ZNF638,ZNF207,SCYL1,N4BP2,ZBTB37,LYPLA1,NUMA1,NDUFS7,SNRPG,COX7C,UPF1,ZNF652,ZNF37A,ANKRD12,KRI1,KIF7,KIF3A,MMADHC,UBTF,MVD,FKBP1A,CNIH4,GAK,RIF1,CRTAP,LUC7L,OLA1,TCEAL4,CTNNBL1,PPIA,RPL23A,POLD1,CCDC137,NDUFC2,YWHAQ,PNISR,TTBK2,METTL16,NASP,PEX2,FAM50A,MBD3,RNF139,CEP131,PPP2CA,CNOT7,SURF6,RAN…
TF	Factor: ZNF597; motif: NGCCGCCATTTTGN	TF:M12310	0.0011902338518882294	2.924367701963016	438	255	17	19917	SAFB2,SAFB,ZNF638,CSNK2A3,MMADHC,RSF1,RIF1,MTX3,METTL16,NASP,PSMC5,UBN2,SCAPER,RBM15,NACA2,DAZ1,RSRC2
TF	Factor: E2F; motif: TTTSGCGS	TF:M00427	0.0012040405482077873	2.9193588871925065	9597	255	154	19917	RPL41,APOC2,MAGED4,SELENOT,BCKDHA,DMAC1,GOLGA4,INO80D,SAFB2,CNIH1,GOLGA3,SMG1,HDGFL2,SAFB,POTEE,RPS14,CCDC88B,SLC38A10,ZNF638,ZNF207,N4BP2,CEP250,LYPLA1,ATP5MG,NUMA1,NDUFS7,COX7C,UPF1,ZNF652,ZNF37A,NIPBL,RANBP2,TCEAL3,KRI1,KIF7,RSF1,CNIH4,GAK,KIAA1109,RIF1,LUC7L,OLA1,RPL23A,POLD1,TIMM8B,CCDC137,COMMD4,YWHAQ,MTX3,PNISR,PTRHD1,TTBK2,NASP,PEX2,MBD3,RNF139,CEP131,NFKBIL1,PPP2CA,CNOT7,SURF6,RAN,EDF1,R…
TF	Factor: E2F-1; motif: TTGGCGCGRAANNGNM	TF:M00938	0.0012260988334982942	2.9114745207532273	7376	255	125	19917	SELENOT,BCKDHA,CNIH1,GOLGA3,SMG1,KIAA0232,ZNF627,ZNF638,ZNF207,SREK1,SCYL1,N4BP2,ZBTB37,CEP250,LYPLA1,ANKRD36C,NUMA1,NDUFS7,SNRPG,UPF1,ZNF652,NONO,KIF7,MVD,GAK,CRTAP,LUC7L,GCC2,PPIA,RPL23A,CCDC137,COMMD4,NDUFC2,YWHAQ,PTRHD1,METTL16,NASP,FAM50A,ELOC,ZNF221,CEP131,RAN,EDF1,PURA,PSMC5,RPL15,AXIN1,UBXN7,ARFRP1,RER1,EIF3CL,CDK11B,PELP1,DAZAP1,CCDC9,RPL10A,TELO2,MINDY2,INTS1,C3ORF38,CCDC12,EIF3A,UBN2,B…
TF	Factor: C/EBPbeta; motif: NRTTGCGYAAYN	TF:M11316	0.0012547567440456212	2.9014404614008944	5277	255	96	19917	RPL41,LSM8,SAFB2,GOLGA3,HDGFL2,RPS14,CCDC88B,KIAA0232,FKBP2,ZNF638,ZNF207,SREK1,CEP250,LYPLA1,NUMA1,NDUFS7,SNRPG,RBM6,KRI1,KIF3A,CSNK2A3,FKBP1A,RIF1,GCC2,RPL23A,NDUFC2,PTRHD1,TTBK2,METTL16,CHD2,PEX2,ELOC,SREK1IP1,RNF139,CEP131,NFKBIL1,ANKS3,CNOT7,RRBP1,RPL15,GRIPAP1,CDK11B,PELP1,GOLGB1,CCDC9,RPL10A,RGS12,EIF2S3B,INTS1,ARHGEF18,ARHGAP4,TBL3,EIF3A,UBN2,RESF1,RPS3A,TIMM13,SDHAF4,BDP1,SMG6,SUGP2,SSR3…
TF	Factor: BEN; motif: CAGCGRNV; match class: 1	TF:M01240_1	0.0013286262093217345	2.8765971846420735	13334	255	199	19917	RPL41,LSM8,SUPT4H1,MAGED4,SELENOT,BCKDHA,GOLGA4,SAFB2,CNIH1,GOLGA3,ALMS1,SMG1,HDGFL2,SAFB,KCMF1,CCDC88B,KIAA0232,FKBP2,ZNF627,ZNF638,ZNF207,SREK1,N4BP2,ZBTB37,CEP250,LYPLA1,ANKRD36C,ATP5MG,NUMA1,SNRPG,UPF1,ZNF652,RBM6,NONO,NIPBL,RANBP2,TCEAL3,ANKRD12,KRI1,KIF7,KIF3A,MMADHC,UBTF,MVD,RSF1,FKBP1A,GAK,RIF1,CRTAP,LUC7L,GCC2,OLA1,TCEAL4,RPL23A,POLD1,CCDC137,YWHAQ,MTX3,PNISR,PTRHD1,TTBK2,METTL16,NASP,PE…
TF	Factor: Zbtb37; motif: NYACCGCRNTCACCGCR; match class: 1	TF:M12345_1	0.0013534167459535562	2.8685684542525567	1703	255	41	19917	CNIH1,GOLGA3,KCMF1,SLC38A10,RBM6,NIPBL,KRI1,KIF3A,UBTF,GAK,CTNNBL1,NASP,FAM50A,CNOT7,RAN,PURA,UBXN7,HTATSF1,ARFRP1,RER1,C3ORF38,ZGPAT,TBCD,UBE2D2,SUGP2,SNRNP70,UBXN1,GRINA,DDX54,DOHH,CMC4,SLK,PTPN11,USP34,TBCA,MAGEF1,DPP8,ZSWIM9,PPP1R26,SETD2,MORC2
TF	Factor: YY1; motif: NGCCGCCATYTTGN	TF:M12275	0.001357650359954085	2.867212060905078	7095	255	121	19917	RPL41,UQCRHL,LSM8,SUPT4H1,SELENOT,BCKDHA,GOLGA4,SAFB2,ALMS1,SAFB,POTEE,ZNF627,ZNF638,ZNF207,SREK1,CEP250,LYPLA1,ATP5MG,NUMA1,NDUFS7,COX7C,NONO,NIPBL,RANBP2,ANKRD12,KRI1,KIF3A,CSNK2A3,MMADHC,RSF1,CNIH4,RIF1,GCC2,OLA1,PPIA,RPL23A,CCDC137,COMMD4,MTX3,PNISR,TTC3,PTRHD1,METTL16,NASP,CHD2,SREK1IP1,RNF139,CEP131,PPP2CA,RAN,PSMC5,RPL15,GRIPAP1,UBXN7,POLR2J3,HTATSF1,RER1,EIF3CL,CDK11B,PELP1,MACF1,EIF2S3B,…
TF	Factor: ETV5; motif: NCCGGAWGYN; match class: 1	TF:M03983_1	0.0015108180535216118	2.820787834211226	538	255	19	19917	SUPT4H1,RPS14,FKBP2,GTF2A2,SREK1,SNRPG,GAK,CCDC137,AXIN1,RER1,INTS1,PAXX,WDR46,TIMM13,ZNF646,ASB1,PPAN,DMAP1,RPA3
TF	Factor: pax-6; motif: NYACGCWTSANYGMNCN; match class: 1	TF:M11880_1	0.0015191082673928307	2.818411272710174	7112	255	121	19917	RPL41,SUPT4H1,SELENOT,BCKDHA,DMAC1,SAFB2,GOLGA3,ALMS1,SMG1,SAFB,POTEE,CCDC88B,FKBP2,ZNF627,ZNF638,SREK1,N4BP2,LYPLA1,ANKRD36C,ATP5MG,NUMA1,NDUFS7,UPF1,RBM6,NONO,NIPBL,RANBP2,ANKRD12,KIF7,KIF3A,MMADHC,MVD,CNIH4,GAK,CRTAP,LUC7L,OLA1,CTNNBL1,PPIA,TIMM8B,CCDC137,YWHAQ,MTX3,METTL16,NASP,ZNF221,RNF139,CEP131,CNOT7,RAN,PURA,AXIN1,POLR2J3,SAMD8,HTATSF1,ARFRP1,EIF3CL,CDK11B,ZNF707,DAPK3,DAZAP1,CCDC9,TELO2…
TF	Factor: E2F-7; motif: GRGGCGGGAANNN	TF:M09896	0.0015350757315439206	2.813870194140981	10034	255	159	19917	RPL41,SUPT4H1,MAGED4,INO80D,SAFB2,GOLGA3,ALMS1,SMG1,HDGFL2,SAFB,KCMF1,RPS14,CCDC88B,KIAA0232,SLC38A10,FKBP2,GTF2A2,ZNF627,ZNF638,ZNF207,SCYL1,N4BP2,ZBTB37,CEP250,ANKRD36C,ATP5MG,NUMA1,UPF1,RBM6,ZNF37A,RANBP2,ANKRD12,KRI1,UBTF,MVD,RSF1,GAK,KIAA1109,RIF1,LUC7L,GCC2,OLA1,CTNNBL1,PPIA,POLD1,TIMM8B,CCDC137,YWHAQ,PNISR,PTRHD1,TTBK2,METTL16,NASP,PEX2,FAM50A,ELOC,SREK1IP1,CEP131,NFKBIL1,CNOT7,SURF6,RAN,E…
TF	Factor: Elk-1:Pax-9; motif: ACCGGAACYACGCWYSANTG; match class: 1	TF:M08226_1	0.0015904489060566212	2.7984802782536273	5665	255	101	19917	LSM8,MAGED4,GOLGA4,CNIH1,GOLGA3,ALMS1,HDGFL2,KCMF1,RPS14,CCDC88B,SLC38A10,SREK1,ZBTB37,LYPLA1,ATP5MG,NDUFS7,UPF1,NIPBL,RANBP2,TCEAL3,ANKRD12,KIF3A,MMADHC,RSF1,KIAA1109,RIF1,GCC2,RPL23A,TIMM8B,NDUFC2,PNISR,TTC3,PTRHD1,TTBK2,PEX2,ZNF221,SREK1IP1,PPP2CA,CNOT7,PURA,RPL15,AXIN1,POLR2J3,SAMD8,HTATSF1,ARFRP1,MOB1B,EIF3CL,CDK11B,PELP1,DAPK3,TELO2,C3ORF38,ARHGEF18,ARHGAP4,BMS1,PAXX,TAF10,RPS3A,ZGPAT,WDR46…
TF	Factor: TAFII250; motif: RARRWGGCGGMGGNGR	TF:M10086	0.0017211395413491873	2.7641839178297736	9342	255	150	19917	MAGED4,BCKDHA,GOLGA4,SAFB2,ALMS1,SMG1,HDGFL2,SAFB,KCMF1,KIAA0232,SLC38A10,GTF2A2,ZNF638,SREK1,SCYL1,ZBTB37,CEP250,NDUFS7,UPF1,ZNF652,ZNF37A,NIPBL,TCEAL3,ANKRD12,KIF7,CSNK2A3,MMADHC,UBTF,MVD,CNIH4,GAK,KIAA1109,RIF1,LUC7L,TCEAL4,POLD1,CCDC137,COMMD4,YWHAQ,PNISR,PTRHD1,TTBK2,METTL16,NASP,CHD2,PEX2,FAM50A,MBD3,ELOC,SREK1IP1,RNF139,NFKBIL1,PPP2CA,ANKS3,CNOT7,RAN,RRBP1,PURA,AXIN1,GRIPAP1,UBXN7,POLR2J3,…
TF	Factor: E2F-3:FOXI1; motif: NGACACCGCGCCCAC	TF:M08208	0.0017560110757141117	2.755472749189397	12690	255	191	19917	RPL41,UQCRHL,APOC2,SUPT4H1,MAGED4,SELENOT,DMAC1,GOLGA4,INO80D,SAFB2,GOLGA3,ALMS1,SMG1,SAFB,KCMF1,POTEE,CCDC88B,KIAA0232,SLC38A10,FKBP2,GTF2A2,ZNF627,ZNF638,ZNF207,SREK1,SCYL1,N4BP2,ZBTB37,CEP250,ANKRD36C,ATP5MG,NUMA1,NDUFS7,SNRPG,COX7C,UPF1,ZNF652,RBM6,ZNF37A,RANBP2,TCEAL3,ANKRD12,KRI1,UBTF,MVD,CNIH4,GAK,KIAA1109,RIF1,LUC7L,GCC2,OLA1,PPIA,RPL23A,POLD1,CCDC137,NDUFC2,YWHAQ,PNISR,TTC3,PTRHD1,TTBK2,…
TF	Factor: BTEB1; motif: GGGGGCGGGGCNGSGGGNGS	TF:M09723	0.0017641478803949943	2.7534650127712816	10217	255	161	19917	SUPT4H1,MAGED4,BCKDHA,DMAC1,INO80D,GOLGA3,SMG1,HDGFL2,KCMF1,POTEE,RPS14,CCDC88B,KIAA0232,SLC38A10,FKBP2,GTF2A2,ZNF627,SREK1,SCYL1,ZBTB37,CEP250,LYPLA1,ANKRD36C,NUMA1,COX7C,ZNF652,RBM6,ZNF37A,NONO,ANKRD12,KRI1,KIF7,KIF3A,UBTF,MVD,RSF1,FKBP1A,GAK,CRTAP,GCC2,TCEAL4,CTNNBL1,PPIA,POLD1,COMMD4,YWHAQ,MTX3,PNISR,METTL16,NASP,FAM50A,MBD3,ELOC,RNF139,CEP131,NFKBIL1,PPP2CA,CNOT7,RAN,EDF1,RRBP1,PURA,AXIN1,GR…
TF	Factor: RUNX3; motif: NRACCGCANWAACCRCAN	TF:M04110	0.0018197079068118902	2.739998317861283	9352	255	150	19917	RPL41,APOC2,SAFB2,CNIH1,GOLGA3,SMG1,HDGFL2,SAFB,KCMF1,KIAA0232,SLC38A10,FKBP2,GTF2A2,ZNF627,ZNF638,ZNF207,SCYL1,ZBTB37,ANKRD36C,SNRPG,UPF1,ZNF652,RBM6,NIPBL,RANBP2,ANKRD12,KRI1,KIF3A,CSNK2A3,MVD,FKBP1A,GAK,RIF1,LUC7L,GCC2,OLA1,TCEAL4,CTNNBL1,PPIA,NDUFC2,MTX3,PNISR,PTRHD1,NASP,FAM50A,MBD3,ELOC,ZNF221,SREK1IP1,RNF139,CEP131,NFKBIL1,PPP2CA,ANKS3,CNOT7,RAN,EDF1,RRBP1,PURA,PSMC5,RPL15,AXIN1,UBXN7,SAMD…
TF	Factor: nerf; motif: NANSCGGAAGTN	TF:M11460	0.0018781488771116295	2.726269985048929	742	255	23	19917	RPL41,BCKDHA,SLC38A10,GTF2A2,ATP5MG,GAK,GCC2,TIMM8B,CCDC137,PNISR,NASP,PEX2,CEP131,PSMC5,WDR46,SSR3,ZNF646,UBXN1,CMC4,DPP8,ZSWIM9,CCZ1B,CREBZF
TF	Factor: GABPA; motif: ACCGGAAGTN; match class: 1	TF:M03990_1	0.0018781488771116295	2.726269985048929	1217	255	32	19917	SUPT4H1,GOLGA3,RPS14,FKBP2,GTF2A2,SREK1,N4BP2,ZBTB37,SNRPG,GAK,RPL23A,MTX3,NASP,PEX2,AXIN1,ARFRP1,ZNF707,INTS1,PAXX,ZGPAT,WDR46,TIMM13,SSR3,ZNF646,ASB1,PPAN,STK19,CYTH2,DMAP1,ANTKMT,SETD2,RPA3
TF	Factor: Sp1; motif: NWRGCCMCGCCCMCN	TF:M12151	0.0020555879324820506	2.687063940545066	6864	255	117	19917	RPL41,MAGED4,GOLGA3,ALMS1,SMG1,HDGFL2,KCMF1,POTEE,CCDC88B,KIAA0232,SLC38A10,FKBP2,GTF2A2,ZNF627,SCYL1,CEP250,LYPLA1,ANKRD36C,NUMA1,UPF1,ZNF652,NONO,NIPBL,TCEAL3,ANKRD12,KRI1,KIF7,KIF3A,MVD,RSF1,FKBP1A,CNIH4,RIF1,CRTAP,OLA1,PPIA,POLD1,COMMD4,MTX3,METTL16,NASP,FAM50A,MBD3,RNF139,CEP131,PPP2CA,CNOT7,RAN,RRBP1,AXIN1,UBXN7,SAMD8,HTATSF1,ARFRP1,RER1,PELP1,ZNF707,DAPK3,DAZAP1,CCDC9,TELO2,MINDY2,EIF2S3B,…
TF	Factor: ER71:SREBP-2; motif: NTSACGTGACGGAARY; match class: 1	TF:M08457_1	0.0020760038187217474	2.682771851956404	5633	255	100	19917	BCKDHA,GOLGA4,SAFB2,SMG1,SAFB,KCMF1,CCDC88B,FKBP2,GTF2A2,ZNF638,ZNF207,SCYL1,N4BP2,ZBTB37,ATP5MG,NDUFS7,ZNF37A,NONO,NIPBL,KRI1,KIF7,MVD,RSF1,FKBP1A,CNIH4,GAK,RIF1,PPIA,TIMM8B,CCDC137,COMMD4,MTX3,NASP,CEP131,NFKBIL1,ANKS3,CNOT7,SURF6,RAN,EDF1,PURA,PSMC5,RPL15,POLR2J3,ARFRP1,MOB1B,RER1,ZNF707,RPL10A,RGS12,MINDY2,PSENEN,UBN2,ZGPAT,WDR46,RAB8A,TBCD,SUGP2,DNAJC5,CFL2,HBE1,SNRNP70,UBXN1,CANX,SLC25A5,EW…
TF	Factor: Sp1; motif: CCCCGCCCCN	TF:M00933	0.0021261687403722877	2.672402271278159	9772	255	155	19917	SUPT4H1,MAGED4,SELENOT,DMAC1,GOLGA4,INO80D,GOLGA3,SMG1,HDGFL2,KCMF1,POTEE,CCDC88B,KIAA0232,SLC38A10,FKBP2,ZNF627,SREK1,SCYL1,ZBTB37,CEP250,LYPLA1,ANKRD36C,NUMA1,COX7C,ZNF652,RBM6,ZNF37A,NONO,NIPBL,ANKRD12,KRI1,KIF7,KIF3A,UBTF,MVD,RSF1,KIAA1109,RIF1,CRTAP,GCC2,OLA1,CTNNBL1,PPIA,POLD1,CCDC137,COMMD4,YWHAQ,MTX3,NASP,CHD2,FAM50A,MBD3,ELOC,RNF139,CEP131,NFKBIL1,PPP2CA,CNOT7,SURF6,RAN,EDF1,RRBP1,PURA,A…
TF	Factor: ETV7; motif: NNSCGGAAGTR; match class: 1	TF:M08760_1	0.002232951118124582	2.651120784031617	333	255	14	19917	RPS14,SLC38A10,FKBP2,GTF2A2,NIPBL,CCDC137,ELOC,C3ORF38,PSENEN,ZNF646,DMAP1,SLX1A,ZSWIM9,RPA3
TF	Factor: ELF1; motif: NCCGGAARTN; match class: 1	TF:M02053_1	0.002251855687744556	2.64745944509264	1571	255	38	19917	SUPT4H1,GOLGA3,RPS14,FKBP2,GTF2A2,N4BP2,ATP5MG,COX7C,FKBP1A,GAK,PPIA,RPL23A,MTX3,PEX2,PSMC5,AXIN1,ARFRP1,RER1,CCDC9,C3ORF38,BMS1,PAXX,ZGPAT,WDR46,TIMM13,SSR3,ZNF646,UBXN1,ASB1,PPAN,C6ORF47,THRAP3,CYTH2,DMAP1,FCHSD2,SLX1A,ANTKMT,RPA3
TF	Factor: AhR,; motif: NRCGTGNGN	TF:M00976	0.002265938706426103	2.6447518419664187	4387	255	82	19917	UQCRHL,LSM8,BCKDHA,GOLGA4,SAFB2,SAFB,KCMF1,POTEE,KIAA0232,GTF2A2,ZNF638,N4BP2,LYPLA1,NUMA1,COX7C,UPF1,ZNF652,ZNF37A,ANKRD12,KRI1,KIF3A,MMADHC,MVD,FKBP1A,GAK,RIF1,LUC7L,PPIA,PNISR,TTBK2,METTL16,NASP,MBD3,SURF6,RAN,RRBP1,AXIN1,HTATSF1,MOB1B,DAPK3,DAZAP1,TELO2,INTS1,EIF3A,BMS1,PAXX,TIMM13,CASP8AP2,RAB8A,TBCD,CFAP410,KIF5B,SMG6,HELZ,DNAJC5,SCAPER,CEP192,SNRNP70,ATP5F1E,RBM15,GRINA,ZNF444,ASB1,ENGASE,…
TF	Factor: TIEG1; motif: NCCCNSNCCCCGCCCCC; match class: 1	TF:M12351_1	0.0024336752406409227	2.6137373762323817	8242	255	135	19917	MAGED4,DMAC1,INO80D,SAFB2,GOLGA3,SMG1,HDGFL2,SAFB,KCMF1,KIAA0232,FKBP2,ZNF627,SCYL1,N4BP2,ZBTB37,CEP250,ANKRD36C,NUMA1,ZNF652,NONO,NIPBL,ANKRD12,KRI1,KIF7,UBTF,RSF1,KIAA1109,RIF1,CRTAP,OLA1,TCEAL4,CTNNBL1,PPIA,POLD1,CCDC137,YWHAQ,MTX3,PNISR,TTBK2,NASP,FAM50A,MBD3,ELOC,RNF139,CEP131,NFKBIL1,PPP2CA,CNOT7,RAN,EDF1,RRBP1,PURA,RPL15,AXIN1,GRIPAP1,UBXN7,POLR2J3,SAMD8,HTATSF1,MOB1B,RER1,PELP1,ZNF707,DAP…
TF	Factor: AP-2; motif: MKCCCSCNGGCG	TF:M00189	0.0026316186842037497	2.579777038820763	10687	255	166	19917	LSM8,SELENOT,BCKDHA,GOLGA4,INO80D,SAFB2,GOLGA3,ALMS1,SMG1,HDGFL2,SAFB,KCMF1,KIAA0232,SLC38A10,FKBP2,GTF2A2,ZNF207,SREK1,SCYL1,N4BP2,ZBTB37,CEP250,LYPLA1,ANKRD36C,ATP5MG,NUMA1,NDUFS7,COX7C,UPF1,ZNF652,ZNF37A,NIPBL,RANBP2,ANKRD12,KIF7,KIF3A,UBTF,MVD,FKBP1A,CNIH4,GAK,KIAA1109,RIF1,CRTAP,LUC7L,GCC2,OLA1,PPIA,POLD1,CCDC137,COMMD4,YWHAQ,TTC3,PTRHD1,NASP,PEX2,FAM50A,MBD3,ZNF221,RNF139,CEP131,PPP2CA,CNOT…
TF	Factor: AP-2gamma:Elk-1; motif: NGCCKNRGGSGRCGGAAGTG	TF:M08441	0.002739172607849154	2.562380599993391	16491	255	232	19917	RPL41,UQCRHL,LSM8,APOC2,MAGED4,SELENOT,BCKDHA,DMAC1,GOLGA4,SAFB2,CNIH1,GOLGA3,ALMS1,SMG1,HDGFL2,SAFB,KCMF1,POTEE,RPS14,CCDC88B,KIAA0232,SLC38A10,FKBP2,GTF2A2,ZNF638,ZNF207,SREK1,SCYL1,N4BP2,ZBTB37,CEP250,LYPLA1,ANKRD36C,ATP5MG,NUMA1,NDUFS7,SNRPG,COX7C,UPF1,ZNF652,RBM6,ZNF37A,NONO,NIPBL,RANBP2,TCEAL3,ANKRD12,KRI1,KIF7,KIF3A,MMADHC,UBTF,MVD,RSF1,FKBP1A,CNIH4,KIAA1109,RIF1,CRTAP,LUC7L,GCC2,OLA1,TCEA…
TF	Factor: Sp3; motif: GGGGCGGGGSNN	TF:M07615	0.0028909722889179958	2.538956071189142	6845	255	116	19917	SUPT4H1,MAGED4,DMAC1,INO80D,GOLGA3,SMG1,HDGFL2,KCMF1,POTEE,KIAA0232,SLC38A10,FKBP2,ZNF627,SCYL1,CEP250,LYPLA1,NUMA1,COX7C,RBM6,ZNF37A,NONO,ANKRD12,KRI1,KIF7,KIF3A,UBTF,MVD,RSF1,RIF1,CRTAP,OLA1,PPIA,POLD1,COMMD4,YWHAQ,MTX3,NASP,FAM50A,MBD3,RNF139,CEP131,NFKBIL1,CNOT7,SURF6,RAN,EDF1,RRBP1,PURA,AXIN1,UBXN7,SAMD8,HTATSF1,ZNF707,DAPK3,DAZAP1,CCDC9,TELO2,EIF2S3B,INTS1,ARHGAP4,PSENEN,PAXX,RESF1,RPS3A,WD…
TF	Factor: Pet-1; motif: NACCGGAAGTN	TF:M11406	0.0028909722889179958	2.538956071189142	1305	255	33	19917	SUPT4H1,FKBP2,GTF2A2,NIPBL,GAK,RPL23A,TIMM8B,CHD2,PEX2,ZNF221,CEP131,GOLGB1,DAPK3,CCDC9,MINDY2,C3ORF38,PSENEN,WDR46,ZNF646,RBM15,ASB1,PPAN,CMC4,HYPK,ZBTB17,PAF1,TSR3,DMAP1,MAGEF1,ANTKMT,DPP8,ZSWIM9,CREBZF
TF	Factor: ETF; motif: GVGGMGG; match class: 1	TF:M00695_1	0.0028909722889179958	2.538956071189142	7067	255	119	19917	DMAC1,GOLGA4,INO80D,SAFB2,GOLGA3,ALMS1,SMG1,HDGFL2,SAFB,KCMF1,KIAA0232,SLC38A10,GTF2A2,SREK1,SCYL1,N4BP2,ZBTB37,LYPLA1,NDUFS7,UPF1,ZNF652,NIPBL,RANBP2,ANKRD12,UBTF,MVD,RSF1,FKBP1A,CNIH4,GAK,KIAA1109,CRTAP,GCC2,OLA1,PPIA,CCDC137,YWHAQ,TTBK2,FAM50A,MBD3,RNF139,CEP131,PPP2CA,CNOT7,RAN,RRBP1,PURA,AXIN1,UBXN7,POLR2J3,SAMD8,HTATSF1,ARFRP1,MOB1B,RER1,CDK11B,ZNF707,DAPK3,DAZAP1,MINDY2,INTS1,TBL3,EIF3A,UB…
TF	Factor: pax-6; motif: NYACGCNTSANYGCNYN; match class: 1	TF:M11881_1	0.0028909722889179958	2.538956071189142	7216	255	121	19917	BCKDHA,DMAC1,SAFB2,GOLGA3,SMG1,SAFB,POTEE,CCDC88B,FKBP2,GTF2A2,ZNF627,ZNF638,SREK1,SCYL1,N4BP2,CEP250,LYPLA1,ANKRD36C,ATP5MG,NUMA1,SNRPG,UPF1,NONO,NIPBL,RANBP2,ANKRD12,KIF7,KIF3A,MMADHC,MVD,CNIH4,GAK,CRTAP,LUC7L,OLA1,CTNNBL1,PPIA,RPL23A,TIMM8B,CCDC137,NDUFC2,YWHAQ,MBD3,ZNF221,RNF139,CEP131,CNOT7,SURF6,PURA,POLR2J3,HTATSF1,ARFRP1,EIF3CL,CDK11B,ZNF707,DAPK3,DAZAP1,CCDC9,TELO2,RGS12,INTS1,C3ORF38,TB…
TF	Factor: Sp1; motif: NGGGGGCGGGGYN	TF:M00196	0.0028909722889179958	2.538956071189142	10303	255	161	19917	RPL41,SUPT4H1,MAGED4,DMAC1,GOLGA4,INO80D,GOLGA3,ALMS1,SMG1,HDGFL2,KCMF1,POTEE,RPS14,CCDC88B,KIAA0232,SLC38A10,FKBP2,GTF2A2,ZNF627,SCYL1,ZBTB37,CEP250,LYPLA1,ANKRD36C,NUMA1,COX7C,RBM6,ZNF37A,NONO,NIPBL,ANKRD12,KRI1,KIF7,KIF3A,UBTF,MVD,RSF1,RIF1,CRTAP,GCC2,OLA1,CTNNBL1,PPIA,POLD1,CCDC137,COMMD4,YWHAQ,MTX3,PTRHD1,NASP,FAM50A,MBD3,RNF139,CEP131,NFKBIL1,PPP2CA,CNOT7,SURF6,RAN,EDF1,RRBP1,PURA,PSMC5,RPL…
TF	Factor: ZFX; motif: SNAGGCCNCR; match class: 1	TF:M10121_1	0.002913118865229068	2.5356417943081815	818	255	24	19917	SELENOT,SAFB2,SMG1,HDGFL2,SAFB,KCMF1,SLC38A10,SCYL1,FKBP1A,CRTAP,OLA1,NASP,CEP131,EDF1,AXIN1,MOB1B,CFAP410,DNAJC5,EWSR1,GRINA,LNPEP,ARHGAP45,FAM199X,MORC2
TF	Factor: Osx; motif: CCNCCCCCNNN	TF:M07329	0.0029722359963900683	2.5269167104360575	6851	255	116	19917	RPL41,LSM8,SUPT4H1,MAGED4,SAFB2,GOLGA3,ALMS1,HDGFL2,SAFB,KCMF1,POTEE,RPS14,SLC38A10,FKBP2,GTF2A2,ZNF627,ZNF638,SCYL1,N4BP2,ZBTB37,CEP250,NUMA1,ZNF652,ZNF37A,NONO,ANKRD12,KRI1,KIF7,UBTF,GAK,KIAA1109,RIF1,LUC7L,PPIA,CCDC137,YWHAQ,PTRHD1,NASP,MBD3,ELOC,NFKBIL1,CNOT7,RRBP1,PURA,RPL15,AXIN1,GRIPAP1,UBXN7,SAMD8,HTATSF1,ARFRP1,MOB1B,RER1,DAPK3,DAZAP1,CCDC9,EIF2S3B,INTS1,CCDC12,UBN2,PAXX,ZGPAT,WDR46,TIMM…
TF	Factor: Kaiso; motif: TCTCGCGAG	TF:M04691	0.0030304470901991506	2.518493294110708	15263	255	219	19917	RPL41,UQCRHL,LSM8,APOC2,SUPT4H1,MAGED4,SELENOT,BCKDHA,DMAC1,GOLGA4,INO80D,SAFB2,GOLGA3,SAFB,KCMF1,POTEE,RPS14,CCDC88B,SLC38A10,FKBP2,GTF2A2,ZNF627,ZNF638,ZNF207,SREK1,SCYL1,N4BP2,ZBTB37,CEP250,LYPLA1,ANKRD36C,ATP5MG,NUMA1,NDUFS7,SNRPG,COX7C,ZNF652,RBM6,ZNF37A,NONO,NIPBL,RANBP2,TCEAL3,ANKRD12,KIF7,KIF3A,CSNK2A3,MMADHC,MVD,RSF1,CNIH4,GAK,CRTAP,LUC7L,GCC2,OLA1,CTNNBL1,PPIA,RPL23A,POLD1,TIMM8B,CCDC13…
TF	Factor: ER71:HOXA2; motif: RCCGGAAGNNNNNNNMATTA	TF:M08557	0.003103848064619488	2.5080995458907607	224	255	11	19917	SUPT4H1,RPS14,POLD1,PPP2CA,PSMC5,GOLGB1,CCDC9,CEP192,FAM199X,USP34,RSRC2
TF	Factor: Pet-1; motif: NACCGGAAGTN	TF:M11407	0.0033052769008817765	2.4807921514619777	774	255	23	19917	SUPT4H1,FKBP2,GTF2A2,NIPBL,RPL23A,TIMM8B,PEX2,ZNF221,CEP131,DAPK3,CCDC9,C3ORF38,ZNF646,ASB1,PPAN,CMC4,PAF1,TSR3,DMAP1,MAGEF1,ANTKMT,DPP8,ZSWIM9
TF	Factor: YY2; motif: NCCGCCATNTY; match class: 1	TF:M03925_1	0.0035514851216631124	2.4495900003902493	778	255	23	19917	SAFB2,SAFB,NONO,FKBP1A,TCEAL4,TIMM8B,PTRHD1,METTL16,RNF139,PPP2CA,RAN,PSMC5,EIF3CL,PELP1,UBN2,WDR46,HNRNPLL,KIF5B,SSR3,TSR3,DAZ1,USP34,RSRC2
TF	Factor: DP-1; motif: NRNNGGCGGGAANN	TF:M10098	0.0035731614543976437	2.446947359624657	7103	255	119	19917	SUPT4H1,MAGED4,SAFB2,ALMS1,SMG1,HDGFL2,SAFB,KCMF1,KIAA0232,SLC38A10,FKBP2,ZNF627,ZNF638,SCYL1,N4BP2,ZBTB37,CEP250,ANKRD36C,NUMA1,RANBP2,ANKRD12,KRI1,UBTF,MVD,RSF1,GAK,KIAA1109,RIF1,LUC7L,OLA1,CTNNBL1,PPIA,POLD1,TIMM8B,CCDC137,YWHAQ,PTRHD1,TTBK2,METTL16,NASP,PEX2,ELOC,SREK1IP1,CEP131,NFKBIL1,RAN,EDF1,RRBP1,PURA,RPL15,AXIN1,GRIPAP1,UBXN7,ARFRP1,DAPK3,DAZAP1,CCDC9,TELO2,MINDY2,INTS1,ARHGAP4,PSENEN,U…
TF	Factor: BTEB3; motif: CCNNSCCNSCCCCKCCCCC	TF:M09826	0.00361329274373365	2.44209685109797	11560	255	176	19917	SUPT4H1,MAGED4,BCKDHA,DMAC1,INO80D,SAFB2,GOLGA3,SMG1,HDGFL2,SAFB,KCMF1,POTEE,RPS14,CCDC88B,KIAA0232,SLC38A10,FKBP2,GTF2A2,ZNF627,SREK1,SCYL1,N4BP2,ZBTB37,CEP250,LYPLA1,NUMA1,COX7C,ZNF652,RBM6,NONO,NIPBL,ANKRD12,KRI1,KIF7,KIF3A,UBTF,MVD,RSF1,KIAA1109,RIF1,CRTAP,LUC7L,GCC2,OLA1,TCEAL4,CTNNBL1,PPIA,POLD1,CCDC137,COMMD4,YWHAQ,MTX3,PNISR,NASP,CHD2,FAM50A,MBD3,ELOC,RNF139,CEP131,NFKBIL1,PPP2CA,CNOT7,RA…
TF	Factor: E2F-1; motif: TTTSGCGS	TF:M00431	0.0037080342992093234	2.4308562572976458	7333	255	122	19917	SELENOT,DMAC1,GOLGA4,INO80D,SAFB2,CNIH1,GOLGA3,SMG1,HDGFL2,SAFB,POTEE,CCDC88B,SLC38A10,ZNF638,ZNF207,N4BP2,CEP250,LYPLA1,ATP5MG,NUMA1,COX7C,UPF1,NIPBL,RANBP2,KIF7,RSF1,RIF1,LUC7L,OLA1,RPL23A,POLD1,CCDC137,COMMD4,YWHAQ,MTX3,PNISR,TTBK2,NASP,PEX2,RNF139,CEP131,NFKBIL1,PPP2CA,CNOT7,SURF6,RAN,RRBP1,PSMC5,RPL15,ARFRP1,EIF3CL,CDK11B,PELP1,ZNF707,DAPK3,DAZAP1,CCDC9,RPL10A,TELO2,MINDY2,ARHGEF18,TBL3,EIF3…
TF	Factor: YY1; motif: CAARATGGCNGC	TF:M07234	0.0038366325247770356	2.416049795824947	6088	255	105	19917	RPL41,UQCRHL,SUPT4H1,SELENOT,BCKDHA,GOLGA4,SAFB2,SAFB,ZNF627,ZNF638,ZNF207,SREK1,CEP250,ATP5MG,NUMA1,NDUFS7,COX7C,NONO,RANBP2,ANKRD12,KRI1,CSNK2A3,MMADHC,RSF1,CNIH4,RIF1,PPIA,RPL23A,CCDC137,COMMD4,YWHAQ,MTX3,PNISR,TTC3,PTRHD1,METTL16,NASP,CHD2,SREK1IP1,RNF139,PPP2CA,RAN,PSMC5,RPL15,GRIPAP1,UBXN7,HTATSF1,RER1,EIF3CL,CDK11B,PELP1,EIF2S3B,FAM71D,PCBP2,ARHGAP4,TBL3,PSENEN,EIF3A,UBN2,WDR46,CASP8AP2,RA…
TF	Factor: KLF15; motif: RCCMCRCCCMCN	TF:M12160	0.004091698932486675	2.388096329204738	12836	255	191	19917	APOC2,MAGED4,SELENOT,BCKDHA,DMAC1,GOLGA4,INO80D,SAFB2,GOLGA3,ALMS1,SMG1,HDGFL2,SAFB,KCMF1,POTEE,CCDC88B,KIAA0232,SLC38A10,FKBP2,ZNF627,SREK1,SCYL1,ZBTB37,CEP250,LYPLA1,ANKRD36C,NUMA1,NDUFS7,COX7C,UPF1,ZNF652,ZNF37A,NONO,NIPBL,RANBP2,TCEAL3,ANKRD12,KRI1,KIF7,KIF3A,UBTF,MVD,RSF1,FKBP1A,CNIH4,GAK,RIF1,GCC2,OLA1,TCEAL4,CTNNBL1,PPIA,POLD1,TIMM8B,CCDC137,COMMD4,NDUFC2,YWHAQ,MTX3,PTRHD1,TTBK2,METTL16,NA…
TF	Factor: Elk-1:HOXB13; motif: ACCGGAAGTNGTAAAN	TF:M08222	0.004094785634747409	2.3877688289665997	7725	255	127	19917	RPL41,LSM8,APOC2,SUPT4H1,BCKDHA,DMAC1,GOLGA3,HDGFL2,KCMF1,RPS14,CCDC88B,SLC38A10,FKBP2,GTF2A2,ZBTB37,CEP250,ATP5MG,NUMA1,SNRPG,COX7C,ZNF652,ZNF37A,NIPBL,RANBP2,RSF1,FKBP1A,CNIH4,GAK,RIF1,CRTAP,GCC2,PPIA,RPL23A,POLD1,TIMM8B,CCDC137,MTX3,PNISR,NASP,CHD2,PEX2,MBD3,ELOC,ZNF221,CEP131,NFKBIL1,ANKS3,SURF6,EDF1,PSMC5,AXIN1,UBXN7,SAMD8,HTATSF1,ARFRP1,MOB1B,RER1,EIF3CL,ZNF707,DAPK3,CCDC9,MINDY2,INTS1,C3OR…
TF	Factor: ELFR; motif: NANSCGGAAGTN	TF:M11455	0.004097408527658681	2.3874907330293382	635	255	20	19917	RPL41,GTF2A2,ATP5MG,GAK,GCC2,TIMM8B,CCDC137,PNISR,NASP,PEX2,CEP131,PSMC5,WDR46,SSR3,ZNF646,UBXN1,CMC4,DPP8,ZSWIM9,CREBZF
TF	Factor: Foxn2; motif: NNGCGTCNNNNNGACGCNN; match class: 1	TF:M11541_1	0.004154533872589813	2.381477695807211	5526	255	97	19917	BCKDHA,GOLGA4,SAFB2,GOLGA3,HDGFL2,SAFB,POTEE,SCYL1,N4BP2,LYPLA1,COX7C,UPF1,NIPBL,RANBP2,ANKRD12,UBTF,MVD,RSF1,RIF1,CRTAP,OLA1,TCEAL4,CTNNBL1,PPIA,RPL23A,COMMD4,TTBK2,NASP,PEX2,RNF139,CEP131,CNOT7,SURF6,RAN,RRBP1,PURA,AXIN1,GRIPAP1,UBXN7,HTATSF1,ARFRP1,MOB1B,RER1,CDK11B,PELP1,DAZAP1,CCDC9,RPL10A,TELO2,MINDY2,INTS1,PSENEN,EIF3A,TAF10,RPS3A,ZGPAT,TIMM13,BDP1,HNRNPLL,KIF5B,SMG6,HELZ,DNAJC5,CEP192,OSE…
TF	Factor: GABP-beta; motif: ASMGGAAGKGN	TF:M01876	0.004190062133493406	2.3777795369303023	2170	255	47	19917	RPL41,APOC2,SUPT4H1,DMAC1,ZNF638,SREK1,LYPLA1,ATP5MG,NUMA1,NIPBL,MMADHC,RIF1,GCC2,POLD1,TIMM8B,CCDC137,CHD2,ELOC,ZNF221,PSMC5,UBXN7,POLR2J3,SAMD8,RER1,CDK11B,ZNF707,GOLGB1,DAPK3,CCDC9,INTS1,C3ORF38,TBL3,CFAP410,RNF2,ZNF646,UBXN1,PRAME,CMC4,STK19,TSR3,THRAP3,DMAP1,SLX1A,ANTKMT,DPP8,ZSWIM9,SETD2
TF	Factor: C/EBPdelta; motif: NRTTGCGYAAYN	TF:M11320	0.004190062133493406	2.3777795369303023	5528	255	97	19917	RPL41,UQCRHL,MAGED4,SELENOT,BCKDHA,SAFB2,HDGFL2,KIAA0232,FKBP2,ZNF638,SREK1,CEP250,LYPLA1,NUMA1,NDUFS7,SNRPG,RBM6,ZNF37A,NONO,KRI1,KIF3A,FKBP1A,RIF1,GCC2,NDUFC2,PTRHD1,TTBK2,METTL16,NASP,CHD2,ELOC,SREK1IP1,RNF139,CEP131,NFKBIL1,ANKS3,CNOT7,RRBP1,RPL15,GRIPAP1,PELP1,GOLGB1,CCDC9,RPL10A,RGS12,MINDY2,EIF2S3B,INTS1,ARHGEF18,ARHGAP4,TBL3,UBN2,RESF1,RPS3A,WDR46,TIMM13,CASP8AP2,SDHAF4,BDP1,SMG6,SUGP2,SS…
TF	Factor: EGR-1; motif: TGCGTGGGCGK	TF:M01972	0.0042511825800698195	2.3714902425242785	5388	255	95	19917	APOC2,SUPT4H1,MAGED4,DMAC1,SAFB2,GOLGA3,ALMS1,SAFB,KCMF1,SLC38A10,FKBP2,ZNF638,ZNF207,SCYL1,LYPLA1,ATP5MG,NUMA1,COX7C,ZNF652,NONO,NIPBL,ANKRD12,KRI1,RSF1,PPIA,POLD1,CCDC137,YWHAQ,MTX3,METTL16,PEX2,MBD3,ELOC,CEP131,RAN,PURA,AXIN1,UBXN7,SAMD8,ARFRP1,RER1,EIF3CL,DAZAP1,CCDC9,MINDY2,INTS1,ARHGAP4,PSENEN,UBN2,PAXX,RPS3A,ZGPAT,RAB8A,TBCD,BDP1,HNRNPLL,CFAP410,HELZ,DNAJC5,CFL2,SSR3,SNRNP70,ZNF646,ATP5F1E…
TF	Factor: YY1; motif: GCCGCCATNTTGNNNNNGGNCN; match class: 1	TF:M04696_1	0.0042681820759284264	2.369757062329957	1988	255	44	19917	SUPT4H1,SELENOT,SAFB2,SAFB,ZNF207,SREK1,NDUFS7,COX7C,NONO,CSNK2A3,MMADHC,RSF1,PPIA,PNISR,PTRHD1,NASP,CHD2,RNF139,PPP2CA,PSMC5,GRIPAP1,HTATSF1,RER1,EIF3CL,TBL3,EIF3A,UBN2,RAB8A,KIF5B,ATRAID,RBM15,DOHH,CMC4,EVI5,LUC7L3,THRAP3,CLK1,DAZ1,USP34,CKLF,MAGEF1,RSRC2,CAPZA1,MRFAP1
TF	Factor: Elk-1:HOXA3; motif: ACCGGWAATKRNNTNWCNNATTAN	TF:M08220	0.004504982745896044	2.3463068680315304	12265	255	184	19917	RPL41,UQCRHL,LSM8,APOC2,SELENOT,BCKDHA,GOLGA4,INO80D,CNIH1,GOLGA3,ALMS1,SMG1,HDGFL2,SAFB,KCMF1,POTEE,RPS14,KIAA0232,SLC38A10,FKBP2,ZNF627,ZNF638,ZNF207,SREK1,CEP250,LYPLA1,ANKRD36C,NUMA1,SNRPG,COX7C,ZNF652,RBM6,NONO,NIPBL,RANBP2,KIF7,CSNK2A3,MMADHC,UBTF,MVD,RSF1,FKBP1A,CNIH4,GAK,RIF1,TCEAL4,CTNNBL1,PPIA,RPL23A,POLD1,TIMM8B,CCDC137,COMMD4,NDUFC2,MTX3,PNISR,TTC3,PTRHD1,TTBK2,METTL16,NASP,CHD2,PEX2,…
TF	Factor: SAP1A; motif: NCCGGAARYN	TF:M02058	0.00455383164875003	2.341623028918581	846	255	24	19917	SUPT4H1,FKBP2,GTF2A2,NIPBL,RPL23A,TIMM8B,PEX2,ZNF221,CEP131,DAPK3,CCDC9,C3ORF38,PSENEN,ZNF646,ASB1,PPAN,CMC4,PAF1,TSR3,DMAP1,MAGEF1,ANTKMT,DPP8,ZSWIM9
TF	Factor: Zfp206; motif: TGCGCAKGCGC	TF:M01742	0.004658919840872176	2.3317147617488967	276	255	12	19917	MAGED4,ATP5MG,ZNF652,TIMM8B,PTRHD1,RPL10A,UBN2,TIMM13,DNAJC5,ZBTB17,CKLF,TBCA
TF	Factor: NRF-1; motif: CGCATGCGCR; match class: 1	TF:M00652_1	0.00470755791779538	2.327204328087887	318	255	13	19917	MAGED4,SAFB2,SAFB,UPF1,ZNF652,KRI1,PPIA,TIMM8B,RAN,TIMM13,SNRNP70,CKLF,TBCA
TF	Factor: ER81; motif: NNNGRCMGGAAGYRNNNNNNNS	TF:M09611	0.004886065218786011	2.311040740397816	2692	255	55	19917	ALMS1,KIAA0232,SLC38A10,FKBP2,SREK1,SCYL1,N4BP2,NUMA1,UPF1,NIPBL,UBTF,FKBP1A,GAK,RPL23A,NASP,PEX2,ZNF221,SURF6,AXIN1,RER1,EIF3CL,GOLGB1,DAPK3,CCDC9,MINDY2,EIF2S3B,RPS3A,TIMM13,RAB8A,HNRNPLL,CFAP410,SUGP2,ZNF646,CANX,SLC25A5,ASB1,PPAN,DDX54,CMC4,PTPN11,ATAD2B,ZNF721,STK19,TSR3,C6ORF47,DMAP1,USP34,MAGEF1,RSRC2,ANTKMT,ZSWIM9,RAI1,KCNS3,SETD2,RPA3
TF	Factor: ETF; motif: CCCCGCCCCYN; match class: 1	TF:M07039_1	0.005031154182408124	2.2983323732838676	13735	255	201	19917	SUPT4H1,MAGED4,BCKDHA,DMAC1,GOLGA4,INO80D,SAFB2,CNIH1,GOLGA3,ALMS1,SMG1,HDGFL2,SAFB,KCMF1,POTEE,RPS14,CCDC88B,KIAA0232,SLC38A10,FKBP2,GTF2A2,ZNF627,ZNF638,SCYL1,N4BP2,ZBTB37,CEP250,LYPLA1,ANKRD36C,NUMA1,NDUFS7,COX7C,UPF1,ZNF652,RBM6,ZNF37A,NONO,NIPBL,RANBP2,TCEAL3,ANKRD12,KRI1,KIF7,KIF3A,UBTF,MVD,RSF1,FKBP1A,CNIH4,GAK,KIAA1109,RIF1,CRTAP,GCC2,OLA1,TCEAL4,CTNNBL1,PPIA,RPL23A,POLD1,CCDC137,NDUFC2,Y…
TF	Factor: E2F-4; motif: NNTTCCCGCCNN	TF:M04823	0.005161923218947593	2.2871884596595216	12880	255	191	19917	RPL41,LSM8,SUPT4H1,MAGED4,INO80D,SAFB2,GOLGA3,ALMS1,SMG1,HDGFL2,SAFB,KCMF1,RPS14,KIAA0232,SLC38A10,FKBP2,GTF2A2,ZNF627,ZNF638,ZNF207,SREK1,SCYL1,N4BP2,ZBTB37,CEP250,ANKRD36C,ATP5MG,NUMA1,NDUFS7,SNRPG,UPF1,RBM6,ZNF37A,RANBP2,ANKRD12,KRI1,KIF7,UBTF,MVD,RSF1,GAK,KIAA1109,RIF1,LUC7L,GCC2,OLA1,CTNNBL1,PPIA,POLD1,TIMM8B,CCDC137,COMMD4,NDUFC2,YWHAQ,MTX3,PNISR,PTRHD1,TTBK2,METTL16,NASP,PEX2,FAM50A,ELOC,Z…
TF	Factor: E2F-4; motif: TTTTGGCGCCAWWN; match class: 1	TF:M11535_1	0.005243771268240298	2.28035626036631	6579	255	111	19917	SELENOT,SAFB2,HDGFL2,SAFB,POTEE,RPS14,SLC38A10,FKBP2,GTF2A2,ZNF627,ZNF207,SREK1,SCYL1,N4BP2,CEP250,LYPLA1,ATP5MG,NUMA1,NDUFS7,SNRPG,COX7C,UPF1,NIPBL,RANBP2,KRI1,UBTF,MVD,RIF1,CRTAP,LUC7L,GCC2,PPIA,RPL23A,CCDC137,COMMD4,MTX3,PNISR,TTBK2,NASP,MBD3,CEP131,PPP2CA,CNOT7,EDF1,RPL15,AXIN1,POLR2J3,HTATSF1,ARFRP1,MOB1B,EIF3CL,CDK11B,PELP1,DAZAP1,TELO2,MINDY2,INTS1,ARHGEF18,TBL3,UBN2,PAXX,ZGPAT,CASP8AP2,SD…
TF	Factor: Foxn2; motif: NNGCGTCNNNNNGACGCNN	TF:M11541	0.005396008540024206	2.2679273716609094	5784	255	100	19917	BCKDHA,GOLGA4,SAFB2,GOLGA3,HDGFL2,SAFB,POTEE,SCYL1,N4BP2,LYPLA1,COX7C,UPF1,NONO,NIPBL,RANBP2,ANKRD12,UBTF,MVD,RSF1,RIF1,CRTAP,OLA1,TCEAL4,CTNNBL1,PPIA,RPL23A,COMMD4,TTBK2,NASP,PEX2,RNF139,CEP131,CNOT7,SURF6,RAN,RRBP1,PURA,AXIN1,GRIPAP1,UBXN7,HTATSF1,ARFRP1,MOB1B,RER1,CDK11B,PELP1,DAZAP1,CCDC9,RPL10A,TELO2,MINDY2,INTS1,PSENEN,EIF3A,TAF10,RPS3A,ZGPAT,TIMM13,BDP1,HNRNPLL,KIF5B,SMG6,HELZ,DNAJC5,SCAPE…
TF	Factor: USF1; motif: RNCACGTGAY	TF:M04196	0.005398134447023658	2.267756303018971	1829	255	41	19917	UQCRHL,CNIH1,SMG1,ZNF207,SREK1,SCYL1,CEP250,TCEAL3,ANKRD12,TCEAL4,COMMD4,MTX3,PNISR,ANKS3,DAZAP1,CCDC9,RGS12,EIF3A,TIMM13,TBCD,SUGP2,CFL2,SCAPER,SSR3,SNRNP70,UBXN1,CANX,RBM15,DDX54,DOHH,SLK,PTPN11,HDAC4,TSR3,ANKRD23,THRAP3,ARHGAP45,SLX1A,CKLF,MORC2,RPA3
TF	Factor: ELK1; motif: NACTTCCGSCGGAAGYN	TF:M03971	0.005404409384684402	2.267251760542808	11390	255	173	19917	RPL41,APOC2,SUPT4H1,BCKDHA,GOLGA4,INO80D,SAFB2,CNIH1,GOLGA3,ALMS1,SMG1,HDGFL2,SAFB,KCMF1,RPS14,CCDC88B,KIAA0232,FKBP2,GTF2A2,SREK1,N4BP2,ZBTB37,LYPLA1,ANKRD36C,ATP5MG,NDUFS7,SNRPG,COX7C,UPF1,ZNF652,ZNF37A,NONO,NIPBL,RANBP2,TCEAL3,ANKRD12,KRI1,KIF7,KIF3A,UBTF,RSF1,FKBP1A,CNIH4,GAK,KIAA1109,RIF1,CRTAP,LUC7L,TCEAL4,CTNNBL1,PPIA,RPL23A,TIMM8B,COMMD4,NDUFC2,YWHAQ,PNISR,PTRHD1,FAM50A,MBD3,ELOC,ZNF221,R…
TF	Factor: E2F-6; motif: NGGGCGGGARRNN	TF:M09895	0.005551602053551018	2.2555816722615836	7857	255	128	19917	RPL41,SUPT4H1,MAGED4,INO80D,SAFB2,ALMS1,SMG1,HDGFL2,SAFB,KCMF1,RPS14,KIAA0232,FKBP2,GTF2A2,ZNF638,ZNF207,SCYL1,N4BP2,ZBTB37,CEP250,ANKRD36C,ATP5MG,NUMA1,UPF1,RANBP2,ANKRD12,UBTF,MVD,RSF1,GAK,KIAA1109,RIF1,LUC7L,OLA1,CTNNBL1,PPIA,POLD1,TIMM8B,CCDC137,YWHAQ,MTX3,PNISR,PTRHD1,METTL16,NASP,PEX2,FAM50A,SREK1IP1,CEP131,NFKBIL1,SURF6,RAN,EDF1,RRBP1,PURA,RPL15,AXIN1,GRIPAP1,UBXN7,ARFRP1,ZNF707,DAPK3,DAZA…
TF	Factor: TCFL5; motif: KCACGCGCMC; match class: 1	TF:M11077_1	0.005627678075580045	2.249670753809774	100	255	7	19917	SAFB2,SAFB,POTEE,MBD3,CEP192,ZNF33A,DAZ1
TF	Factor: CREM; motif: TGACGTCASYN	TF:M01820	0.005681938978231304	2.245503434738343	6374	255	108	19917	RPL41,LSM8,APOC2,SUPT4H1,BCKDHA,SAFB2,ALMS1,HDGFL2,SAFB,POTEE,KIAA0232,GTF2A2,ZNF627,SREK1,ZBTB37,LYPLA1,ANKRD36C,NUMA1,NDUFS7,SNRPG,UPF1,RANBP2,TCEAL3,KIF7,MVD,KIAA1109,RIF1,TCEAL4,PPIA,RPL23A,TIMM8B,NDUFC2,YWHAQ,PTRHD1,FAM50A,RNF139,PPP2CA,ANKS3,CNOT7,EDF1,RRBP1,PURA,POLR2J3,SAMD8,HTATSF1,MOB1B,RER1,EIF3CL,CDK11B,GOLGB1,DAPK3,MACF1,CCDC9,RGS12,MINDY2,PCBP2,INTS1,TBL3,PSENEN,EIF3A,UBN2,BMS1,TAF1…
TF	Factor: E2F-1; motif: TTGGCGCGRAANNGNM; match class: 1	TF:M00938_1	0.005698719121320808	2.2442227480211834	2583	255	53	19917	SELENOT,CNIH1,KIAA0232,SCYL1,N4BP2,LYPLA1,NDUFS7,SNRPG,MVD,CRTAP,LUC7L,PPIA,RPL23A,EDF1,PURA,PSMC5,AXIN1,UBXN7,ARFRP1,RER1,PELP1,TELO2,INTS1,PAXX,RESF1,ZGPAT,CASP8AP2,RAB8A,TBCD,CFAP410,SMG6,SUGP2,SCAPER,CEP192,UBXN1,CANX,EWSR1,RBM15,PPAN,ENGASE,LUC7L3,SLK,ZNF721,HDAC4,TSR3,CYTH2,ARHGAP45,JMJD1C,USP34,ANTKMT,ZSWIM9,CCHCR1,MRFAP1
TF	Factor: N-Myc; motif: GSSCACGYGS	TF:M03834	0.005732575406662498	2.241650223823138	1420	255	34	19917	LSM8,BCKDHA,SAFB2,SAFB,POTEE,LYPLA1,UPF1,KRI1,KIF3A,MMADHC,UBTF,FKBP1A,GAK,OLA1,PPIA,TIMM8B,PNISR,MBD3,RAN,DAZAP1,TIMM13,RAB8A,SMG6,CEP192,OSER1,SNRNP70,NCK1,NXF1,SLK,FUNDC2,FCHSD2,RBM12B,ANTKMT,NSMCE2
TF	Factor: ELFR; motif: NANGMGGAAGTN	TF:M11454	0.005732575406662498	2.241650223823138	1079	255	28	19917	RPL41,BCKDHA,DMAC1,RPS14,SLC38A10,GTF2A2,ATP5MG,ZNF37A,GAK,GCC2,TIMM8B,CCDC137,PNISR,NASP,PEX2,ELOC,CEP131,RRBP1,PSMC5,WDR46,SSR3,ZNF646,UBXN1,CMC4,DPP8,ZSWIM9,CCZ1B,CREBZF
TF	Factor: ERF:HOXA3; motif: ACCGGAARYNNNNNNMATTA	TF:M08539	0.00595716030102514	2.224960713328387	168	255	9	19917	RPS14,POLD1,PPP2CA,PSMC5,GOLGB1,CCDC9,CEP192,FAM199X,RSRC2
TF	Factor: Egr-1; motif: NGCGTGCGY; match class: 1	TF:M04950_1	0.006102779234431813	2.2144723401863198	5591	255	97	19917	UQCRHL,LSM8,BCKDHA,GOLGA4,SAFB2,SMG1,SAFB,POTEE,SLC38A10,FKBP2,GTF2A2,ZNF638,ZBTB37,LYPLA1,NDUFS7,UPF1,ZNF652,ANKRD12,KRI1,KIF3A,MVD,FKBP1A,CNIH4,GAK,RIF1,LUC7L,PPIA,RPL23A,POLD1,CCDC137,NDUFC2,PNISR,METTL16,PEX2,MBD3,RNF139,CEP131,PPP2CA,SURF6,RAN,EDF1,RRBP1,AXIN1,UBXN7,ARFRP1,MOB1B,DAPK3,DAZAP1,TELO2,MINDY2,INTS1,TBL3,EIF3A,BMS1,PAXX,TAF10,TIMM13,RAB8A,TBCD,UBE2D2,CFAP410,KIF5B,HELZ,DNAJC5,SCAP…
TF	Factor: IRX2a; motif: ACRYGNNNNACRYGT	TF:M11022	0.006102779234431813	2.2144723401863198	9572	255	150	19917	UQCRHL,LSM8,GOLGA4,INO80D,SAFB2,CNIH1,GOLGA3,SAFB,KCMF1,POTEE,KIAA0232,FKBP2,GTF2A2,ZNF638,SREK1,N4BP2,NUMA1,NDUFS7,SNRPG,UPF1,ZNF652,RBM6,ZNF37A,NONO,NIPBL,TCEAL3,ANKRD12,KRI1,CSNK2A3,UBTF,MVD,FKBP1A,GAK,RIF1,CRTAP,LUC7L,GCC2,OLA1,TCEAL4,CTNNBL1,PPIA,RPL23A,POLD1,CCDC137,COMMD4,MTX3,PTRHD1,METTL16,FAM50A,MBD3,ELOC,RNF139,CEP131,PPP2CA,ANKS3,CNOT7,RAN,EDF1,RRBP1,PURA,PSMC5,AXIN1,ARFRP1,MOB1B,RER1…
TF	Factor: elf5; motif: GAMCCGGAAGTN	TF:M11389	0.006182551666067018	2.208832245659095	1311	255	32	19917	GOLGA4,RPS14,CCDC88B,SLC38A10,GTF2A2,SREK1,SNRPG,COX7C,GAK,RIF1,GCC2,TIMM8B,CCDC137,PNISR,NASP,PEX2,CEP131,PSMC5,AXIN1,SAMD8,PAXX,WDR46,RAB8A,SSR3,ZNF646,UBXN1,CMC4,ATAD2B,ZNF721,DPP8,ZSWIM9,CREBZF
TF	Factor: nerf; motif: NANGCGGAAGTR	TF:M11457	0.006648409158996704	2.177282260880613	1090	255	28	19917	RPL41,BCKDHA,DMAC1,RPS14,SLC38A10,GTF2A2,ATP5MG,GAK,GCC2,TIMM8B,CCDC137,PNISR,NASP,PEX2,ELOC,CEP131,PSMC5,CDK11B,WDR46,SSR3,ZNF646,UBXN1,DHX38,CMC4,DPP8,ZSWIM9,CCZ1B,CREBZF
TF	Factor: YY1; motif: GCCGCCATNTTGNNNNNGGNCN	TF:M04696	0.006763922707552904	2.169801363799763	7894	255	128	19917	RPL41,UQCRHL,LSM8,SUPT4H1,SELENOT,BCKDHA,GOLGA4,SAFB2,ALMS1,HDGFL2,SAFB,ZNF627,ZNF638,ZNF207,SREK1,ZBTB37,CEP250,ATP5MG,NUMA1,NDUFS7,COX7C,NONO,RANBP2,ANKRD12,KRI1,KIF3A,CSNK2A3,MMADHC,RSF1,CNIH4,RIF1,OLA1,TCEAL4,PPIA,RPL23A,CCDC137,COMMD4,YWHAQ,MTX3,PNISR,TTC3,PTRHD1,METTL16,NASP,CHD2,SREK1IP1,RNF139,CEP131,PPP2CA,RAN,PSMC5,RPL15,GRIPAP1,UBXN7,POLR2J3,HTATSF1,RER1,EIF3CL,CDK11B,PELP1,MACF1,TELO2…
TF	Factor: WT1; motif: GNGGGGGCGGGG; match class: 1	TF:M03893_1	0.0067751201815020356	2.169082996586364	3997	255	74	19917	MAGED4,DMAC1,HDGFL2,KCMF1,POTEE,KIAA0232,SLC38A10,FKBP2,SCYL1,ZBTB37,CEP250,ZNF652,ANKRD12,KIF7,UBTF,RSF1,RIF1,POLD1,COMMD4,YWHAQ,NASP,MBD3,CEP131,NFKBIL1,CNOT7,EDF1,PURA,AXIN1,GRIPAP1,UBXN7,SAMD8,HTATSF1,MOB1B,RER1,EIF3CL,DAPK3,DAZAP1,CCDC9,TELO2,MINDY2,INTS1,PAXX,WDR46,TBCD,CFAP410,SMG6,HELZ,DNAJC5,CFL2,RNF2,ZNF646,ATRAID,AKAP13,SLC25A5,GRINA,CMC4,ENGASE,NCK1,PTPN11,ATAD2B,BTG1,HDAC4,LNPEP,CYTH…
TF	Factor: SP1; motif: NRGKGGGCGGGGCN	TF:M09765	0.0067751201815020356	2.169082996586364	7518	255	123	19917	MAGED4,DMAC1,INO80D,GOLGA3,SMG1,HDGFL2,KCMF1,POTEE,CCDC88B,KIAA0232,SLC38A10,FKBP2,GTF2A2,ZNF627,SCYL1,CEP250,LYPLA1,ANKRD36C,NUMA1,ZNF652,RBM6,NONO,ANKRD12,KRI1,KIF7,KIF3A,UBTF,MVD,RSF1,RIF1,CRTAP,OLA1,CTNNBL1,PPIA,POLD1,COMMD4,YWHAQ,MTX3,NASP,FAM50A,MBD3,RNF139,CEP131,NFKBIL1,CNOT7,SURF6,RAN,EDF1,RRBP1,AXIN1,GRIPAP1,UBXN7,SAMD8,HTATSF1,RER1,EIF3CL,PELP1,ZNF707,DAPK3,DAZAP1,CCDC9,TELO2,EIF2S3B,I…
TF	Factor: E2F-1; motif: NTTSGCGG; match class: 1	TF:M00430_1	0.006815727399079505	2.1664877878779523	2541	255	52	19917	SELENOT,SAFB2,GOLGA3,SAFB,SLC38A10,ZNF207,N4BP2,ZNF652,RBM6,NIPBL,RANBP2,RSF1,GAK,LUC7L,YWHAQ,NASP,PEX2,SREK1IP1,RRBP1,RPL15,PELP1,TBL3,TIMM13,TBCD,HNRNPLL,SMG6,SUGP2,SSR3,CEP192,SRPRB,RNF2,SNRNP70,ZNF646,ATP5F1E,CANX,ZNF444,ASB1,CMC4,NXF1,HDAC4,TMEM241,LNPEP,C6ORF47,CYTH2,DAZ1,FCHSD2,CKLF,TBCA,RSRC2,RAI1,MORC2,RPA3
TF	Factor: TCFL5; motif: KCACGCGCNC; match class: 1	TF:M11078_1	0.006918040158395315	2.16001692128684	172	255	9	19917	SAFB2,SAFB,POTEE,MBD3,DAZAP1,CEP192,ZNF33A,SLK,DAZ1
TF	Factor: YY1; motif: NAANATGGCGNNN; match class: 1	TF:M08982_1	0.006998026281438155	2.1550244308353736	1675	255	38	19917	SAFB2,SAFB,ZNF207,NDUFS7,SNRPG,COX7C,NONO,CSNK2A3,TCEAL4,PPIA,RPL23A,TIMM8B,CCDC137,PNISR,PTRHD1,NASP,CHD2,PPP2CA,PSMC5,UBXN7,HTATSF1,RER1,TELO2,TBL3,EIF3A,UBN2,RPS3A,ATRAID,DHX38,HYPK,CLK1,DAZ1,USP34,CKLF,RSRC2,ARL5A,CAPZA1,MORC2
TF	Factor: ER81; motif: NRCMGGAWGNN	TF:M11418	0.007335779402832145	2.1345537369854166	4009	255	74	19917	SUPT4H1,HDGFL2,RPS14,KIAA0232,FKBP2,GTF2A2,ZNF638,ZNF207,SREK1,N4BP2,ANKRD36C,SNRPG,NIPBL,MMADHC,UBTF,FKBP1A,GAK,RPL23A,TIMM8B,NASP,CHD2,PEX2,ZNF221,CEP131,SURF6,PURA,AXIN1,POLR2J3,RER1,CDK11B,GOLGB1,DAPK3,CCDC9,MINDY2,PCBP2,INTS1,C3ORF38,ARHGAP4,PSENEN,PAXX,WDR46,TIMM13,CASP8AP2,HNRNPLL,CFAP410,DNAJC5,SCAPER,ZNF646,CANX,RBM15,DHX38,ASB1,PPAN,CMC4,HYPK,ZBTB17,PTPN11,ATAD2B,ZNF721,STK19,PAF1,TSR3,…
TF	Factor: ESE-1; motif: SATKGCGGATGCN; match class: 1	TF:M11381_1	0.007335779402832145	2.1345537369854166	9844	255	153	19917	RPL41,LSM8,APOC2,MAGED4,SELENOT,BCKDHA,SAFB2,GOLGA3,ALMS1,SMG1,HDGFL2,SAFB,POTEE,CCDC88B,SLC38A10,FKBP2,GTF2A2,ZNF207,SREK1,SCYL1,N4BP2,ZBTB37,CEP250,ANKRD36C,ATP5MG,NUMA1,NDUFS7,COX7C,UPF1,RBM6,NONO,NIPBL,RANBP2,TCEAL3,KRI1,KIF3A,MMADHC,UBTF,MVD,GAK,RIF1,LUC7L,GCC2,TCEAL4,PPIA,POLD1,TIMM8B,CCDC137,COMMD4,NDUFC2,YWHAQ,MTX3,PTRHD1,TTBK2,CHD2,PEX2,FAM50A,SREK1IP1,RNF139,CEP131,NFKBIL1,PPP2CA,ANKS3,…
TF	Factor: USF2; motif: NNCACGTGACN	TF:M11096	0.007667234129396432	2.1153612747700574	1564	255	36	19917	UQCRHL,DMAC1,KIAA0232,SREK1,SCYL1,TCEAL3,ANKRD12,KRI1,UBTF,OLA1,TCEAL4,COMMD4,RAN,CCDC9,TELO2,RGS12,MINDY2,EIF3A,TIMM13,SUGP2,CFL2,SSR3,ATP5F1E,UBXN1,CANX,EWSR1,RBM15,DDX54,DOHH,HDAC4,TMEM241,TSR3,THRAP3,FUNDC2,ARHGAP45,MORC2
TF	Factor: Rb:E2F-1:DP-1; motif: TTTSGCGC; match class: 1	TF:M00740_1	0.007681750989030349	2.1145397749946944	4638	255	83	19917	RPL41,SUPT4H1,SELENOT,DMAC1,GOLGA3,HDGFL2,POTEE,ZNF638,N4BP2,CEP250,ATP5MG,NUMA1,NDUFS7,COX7C,ZNF652,RANBP2,KIF7,KIF3A,MMADHC,GCC2,TIMM8B,COMMD4,NDUFC2,YWHAQ,PNISR,PTRHD1,TTBK2,NASP,PEX2,MBD3,PPP2CA,CNOT7,PSMC5,RPL15,UBXN7,HTATSF1,ARFRP1,EIF3CL,CDK11B,PELP1,DAZAP1,RPL10A,TELO2,MINDY2,EIF2S3B,EIF3A,ZGPAT,CASP8AP2,SDHAF4,RAB8A,TBCD,HNRNPLL,CFL2,SCAPER,SSR3,CEP192,SNRNP70,ZNF646,ATRAID,EWSR1,DHX38,Z…
TF	Factor: GABP-alpha; motif: AACCGGAAR	TF:M04748	0.00803979476930773	2.0947550372832366	16173	255	227	19917	RPL41,LSM8,APOC2,SUPT4H1,MAGED4,SELENOT,BCKDHA,DMAC1,GOLGA4,SAFB2,CNIH1,GOLGA3,ALMS1,SMG1,SAFB,KCMF1,POTEE,RPS14,CCDC88B,KIAA0232,SLC38A10,FKBP2,GTF2A2,ZNF627,ZNF638,ZNF207,SREK1,SCYL1,N4BP2,ZBTB37,CEP250,LYPLA1,ANKRD36C,ATP5MG,NUMA1,NDUFS7,SNRPG,UPF1,ZNF652,RBM6,ZNF37A,NONO,NIPBL,TCEAL3,ANKRD12,KRI1,KIF7,KIF3A,MMADHC,UBTF,MVD,RSF1,FKBP1A,GAK,KIAA1109,RIF1,CRTAP,LUC7L,GCC2,OLA1,TCEAL4,CTNNBL1,PPI…
TF	Factor: pax-6; motif: NYACGCNTSANYGCNYN	TF:M11881	0.008066999309872369	2.0932879802107034	13307	255	195	19917	RPL41,LSM8,APOC2,SUPT4H1,SELENOT,BCKDHA,DMAC1,SAFB2,GOLGA3,ALMS1,SMG1,HDGFL2,SAFB,POTEE,RPS14,CCDC88B,FKBP2,GTF2A2,ZNF627,ZNF638,ZNF207,SREK1,SCYL1,N4BP2,CEP250,LYPLA1,ANKRD36C,ATP5MG,NUMA1,NDUFS7,SNRPG,UPF1,ZNF652,RBM6,ZNF37A,NONO,NIPBL,RANBP2,TCEAL3,ANKRD12,KIF7,KIF3A,CSNK2A3,MMADHC,MVD,RSF1,CNIH4,GAK,RIF1,CRTAP,LUC7L,OLA1,CTNNBL1,PPIA,RPL23A,POLD1,TIMM8B,CCDC137,NDUFC2,YWHAQ,MTX3,TTC3,PTRHD1,M…
TF	Factor: Kaiso; motif: GCMGGGRGCRGS	TF:M03876	0.008066999309872369	2.0932879802107034	13737	255	200	19917	APOC2,MAGED4,BCKDHA,INO80D,SAFB2,CNIH1,SMG1,HDGFL2,SAFB,KCMF1,RPS14,CCDC88B,KIAA0232,SLC38A10,FKBP2,GTF2A2,ZNF627,ZNF638,ZNF207,SREK1,SCYL1,N4BP2,CEP250,LYPLA1,ANKRD36C,ATP5MG,NUMA1,SNRPG,UPF1,ZNF652,RBM6,NIPBL,RANBP2,ANKRD12,KRI1,KIF7,UBTF,MVD,RSF1,CNIH4,GAK,KIAA1109,RIF1,CRTAP,LUC7L,GCC2,OLA1,TCEAL4,PPIA,RPL23A,TIMM8B,CCDC137,COMMD4,NDUFC2,YWHAQ,MTX3,PNISR,PTRHD1,TTBK2,METTL16,NASP,CHD2,PEX2,FA…
TF	Factor: RUNX2; motif: WRACCGCANWAACCGCAN; match class: 1	TF:M04107_1	0.008182332009857319	2.0871229023585967	6513	255	109	19917	SAFB2,CNIH1,GOLGA3,SMG1,HDGFL2,SAFB,KCMF1,SLC38A10,FKBP2,GTF2A2,ZNF627,N4BP2,ZBTB37,ANKRD36C,UPF1,ZNF652,RBM6,NIPBL,RANBP2,ANKRD12,KRI1,KIF7,MVD,GAK,KIAA1109,LUC7L,GCC2,OLA1,CTNNBL1,PPIA,CCDC137,MTX3,PTRHD1,NASP,FAM50A,ZNF221,RNF139,CEP131,NFKBIL1,ANKS3,CNOT7,RAN,RRBP1,PSMC5,RPL15,SAMD8,HTATSF1,ARFRP1,MOB1B,EIF3CL,CDK11B,PELP1,DAPK3,DAZAP1,CCDC9,RPL10A,TELO2,MINDY2,ARHGAP4,UBN2,TAF10,ZGPAT,TIMM13…
TF	Factor: DP-1; motif: NRNNGGCGGGAANN; match class: 1	TF:M10098_1	0.00828226525414527	2.08185086456452	2184	255	46	19917	MAGED4,ALMS1,HDGFL2,KCMF1,SCYL1,N4BP2,ANKRD36C,NUMA1,UBTF,RSF1,RIF1,OLA1,PPIA,POLD1,YWHAQ,NASP,NFKBIL1,RAN,RRBP1,PURA,AXIN1,UBXN7,CCDC9,TELO2,INTS1,ARHGAP4,CASP8AP2,BDP1,HNRNPLL,CFAP410,HELZ,OSER1,ZNF646,UBXN1,CANX,ASB1,PTPN11,HDAC4,CYTH2,FCHSD2,CKLF,ZSWIM9,CCHCR1,KCNS3,MORC2,RPA3
TF	Factor: c-Ets-1(p54); motif: NCMGGAWGYN; match class: 1	TF:M00032_1	0.0083445256353495	2.0785983467984783	2185	255	46	19917	SUPT4H1,GOLGA3,KCMF1,RPS14,SLC38A10,FKBP2,GTF2A2,N4BP2,NUMA1,SNRPG,COX7C,FKBP1A,GAK,CCDC137,NASP,PEX2,AXIN1,ARFRP1,RER1,CDK11B,DAPK3,CCDC9,PAXX,ZGPAT,WDR46,TIMM13,SSR3,ZNF646,CANX,SLC25A5,ASB1,PPAN,DDX54,HYPK,PTPN11,STK19,HDAC4,C6ORF47,CYTH2,ARHGAP45,DAZ1,DMAP1,FCHSD2,ANTKMT,CAPZA1,RPA3
TF	Factor: HAIRYLIKE; motif: NNNNCANGTG; match class: 1	TF:M08885_1	0.008372954546242782	2.0771212664137684	2123	255	45	19917	BCKDHA,DMAC1,SAFB2,SMG1,POTEE,KIAA0232,SCYL1,CEP250,NDUFS7,ANKRD12,KRI1,UBTF,PPIA,POLD1,SURF6,RAN,AXIN1,DAZAP1,CCDC9,TELO2,RGS12,MINDY2,CYTH1,TIMM13,SUGP2,CFL2,SSR3,OSER1,UBXN1,CANX,EWSR1,RBM15,SSB,DDX54,DOHH,SLK,HDAC4,TMEM241,TSR3,FUNDC2,FCHSD2,TULP4,SLX1A,ANTKMT,PPP1R26
TF	Factor: YY1; motif: GCCATNTTN	TF:M00793	0.00866162196113906	2.0624007750940594	5222	255	91	19917	RPL41,UQCRHL,SUPT4H1,BCKDHA,GOLGA4,SAFB2,SAFB,ZNF638,ZNF207,SREK1,CEP250,ATP5MG,NUMA1,NDUFS7,COX7C,NONO,RANBP2,ANKRD12,KRI1,CSNK2A3,MMADHC,RSF1,CNIH4,RIF1,PPIA,RPL23A,CCDC137,MTX3,PNISR,TTC3,PTRHD1,METTL16,NASP,CHD2,SREK1IP1,RNF139,PPP2CA,RAN,PSMC5,RPL15,GRIPAP1,UBXN7,HTATSF1,RER1,EIF3CL,CDK11B,PELP1,EIF2S3B,FAM71D,PCBP2,ARHGAP4,TBL3,PSENEN,EIF3A,UBN2,WDR46,CASP8AP2,BDP1,KIF5B,SMG6,HELZ,SCAPER,CE…
TF	Factor: Pax-6; motif: TTTCACGCWTGANTGMNYN	TF:M04065	0.008757960942571455	2.0575969959403673	10276	255	158	19917	RPL41,UQCRHL,LSM8,SUPT4H1,SELENOT,BCKDHA,DMAC1,SAFB2,GOLGA3,SMG1,SAFB,FKBP2,GTF2A2,ZNF627,ZNF638,SCYL1,CEP250,LYPLA1,ATP5MG,NUMA1,NDUFS7,SNRPG,COX7C,UPF1,RBM6,ZNF37A,NONO,NIPBL,RANBP2,ANKRD12,KRI1,KIF3A,CSNK2A3,MMADHC,UBTF,RSF1,FKBP1A,CNIH4,GAK,RIF1,CRTAP,LUC7L,GCC2,OLA1,PPIA,RPL23A,POLD1,TIMM8B,CCDC137,NDUFC2,YWHAQ,MTX3,PNISR,TTC3,PTRHD1,NASP,PEX2,FAM50A,ZNF221,SREK1IP1,RNF139,CEP131,PPP2CA,CNOT…
TF	Factor: Egr-3; motif: NTGCGTGGGCGK; match class: 1	TF:M00245_1	0.00888887414337067	2.0511532428864134	2382	255	49	19917	SAFB2,GOLGA3,SAFB,POTEE,ZNF207,LYPLA1,NIPBL,ANKRD12,KRI1,GAK,POLD1,NDUFC2,METTL16,FAM50A,RNF139,CEP131,RAN,RRBP1,PURA,RPL15,AXIN1,DAZAP1,CCDC9,INTS1,RPS3A,RAB8A,TBCD,BDP1,HELZ,DNAJC5,CFL2,SNRNP70,ZNF646,SLC25A5,ZNF33A,ASB1,DOHH,CMC4,SLK,BTG1,THRAP3,SMAD4,DAZ1,FCHSD2,ZSWIM9,CCHCR1,PPP1R26,RPA3,TMOD2
TF	Factor: ELF5; motif: ANSMGGAAGTN	TF:M03969	0.009038654127786528	2.0438962319572056	3364	255	64	19917	RPL41,BCKDHA,DMAC1,GOLGA4,GOLGA3,RPS14,CCDC88B,SLC38A10,GTF2A2,SREK1,ZBTB37,ATP5MG,SNRPG,COX7C,MMADHC,GAK,RIF1,GCC2,TIMM8B,CCDC137,MTX3,PNISR,NASP,PEX2,ELOC,CEP131,PSMC5,AXIN1,POLR2J3,SAMD8,ARFRP1,EIF3CL,CDK11B,ZNF707,DAZAP1,TELO2,INTS1,ARHGAP4,PSENEN,BMS1,PAXX,ZGPAT,WDR46,TIMM13,RAB8A,SSR3,ZNF646,UBXN1,SLC25A5,DHX38,CMC4,HYPK,PTPN11,ATAD2B,ZNF721,ARHGAP45,RBM12B,DPP8,ZSWIM9,SETD2,CAPZA1,CCZ1B,CR…
TF	Factor: pax-6; motif: NYACGCNTSRNYGCNYN	TF:M11883	0.009038654127786528	2.0438962319572056	13587	255	198	19917	RPL41,LSM8,APOC2,SUPT4H1,SELENOT,BCKDHA,DMAC1,SAFB2,GOLGA3,ALMS1,SMG1,SAFB,POTEE,RPS14,CCDC88B,SLC38A10,FKBP2,GTF2A2,ZNF627,ZNF638,ZNF207,SREK1,SCYL1,N4BP2,CEP250,LYPLA1,ANKRD36C,ATP5MG,NUMA1,NDUFS7,SNRPG,UPF1,ZNF652,RBM6,ZNF37A,NONO,NIPBL,RANBP2,TCEAL3,ANKRD12,KRI1,KIF7,KIF3A,CSNK2A3,MMADHC,MVD,RSF1,CNIH4,GAK,RIF1,CRTAP,LUC7L,OLA1,CTNNBL1,PPIA,RPL23A,POLD1,TIMM8B,CCDC137,NDUFC2,YWHAQ,MTX3,PTRHD1…
TF	Factor: E2F-1; motif: NTTSGCGG	TF:M00430	0.009547993985518815	2.0200878632363777	8113	255	130	19917	APOC2,SUPT4H1,SELENOT,BCKDHA,DMAC1,GOLGA4,SAFB2,CNIH1,GOLGA3,HDGFL2,SAFB,KCMF1,POTEE,CCDC88B,KIAA0232,SLC38A10,ZNF207,N4BP2,CEP250,COX7C,UPF1,ZNF652,RBM6,NIPBL,RANBP2,TCEAL3,ANKRD12,CSNK2A3,MVD,RSF1,FKBP1A,GAK,KIAA1109,LUC7L,GCC2,OLA1,RPL23A,POLD1,TIMM8B,CCDC137,COMMD4,YWHAQ,TTBK2,NASP,PEX2,MBD3,ELOC,SREK1IP1,RNF139,CEP131,NFKBIL1,SURF6,RAN,RRBP1,PURA,PSMC5,RPL15,GRIPAP1,UBXN7,ARFRP1,RER1,CDK11B,…
TF	Factor: Egr-3; motif: NTGCGTGGGCGK	TF:M00245	0.009707231115471138	2.0129046303141775	7361	255	120	19917	APOC2,MAGED4,SELENOT,DMAC1,SAFB2,GOLGA3,ALMS1,SAFB,KCMF1,POTEE,RPS14,SLC38A10,GTF2A2,ZNF207,SCYL1,N4BP2,LYPLA1,ATP5MG,NUMA1,NDUFS7,SNRPG,COX7C,ZNF652,NONO,NIPBL,ANKRD12,KRI1,KIF7,MMADHC,UBTF,MVD,RSF1,FKBP1A,GAK,PPIA,POLD1,CCDC137,NDUFC2,MTX3,METTL16,PEX2,FAM50A,MBD3,RNF139,CEP131,NFKBIL1,PPP2CA,RAN,RRBP1,PURA,RPL15,AXIN1,UBXN7,HTATSF1,ARFRP1,EIF3CL,CDK11B,DAZAP1,CCDC9,TELO2,MINDY2,INTS1,ARHGAP4,P…
TF	Factor: E2F; motif: TTTSGCGS; match class: 1	TF:M00426_1	0.009968259669862483	2.0013806573101536	5892	255	100	19917	SELENOT,GOLGA4,GOLGA3,HDGFL2,POTEE,KIAA0232,SLC38A10,ZNF638,ZNF207,N4BP2,CEP250,LYPLA1,ATP5MG,NUMA1,NDUFS7,COX7C,UPF1,NIPBL,RANBP2,KIF7,RSF1,CNIH4,KIAA1109,RIF1,CRTAP,PPIA,RPL23A,POLD1,COMMD4,YWHAQ,PNISR,PTRHD1,TTBK2,NASP,PEX2,MBD3,SREK1IP1,CEP131,ANKS3,EDF1,RRBP1,RPL15,UBXN7,HTATSF1,CDK11B,PELP1,ZNF707,DAPK3,DAZAP1,TELO2,MINDY2,EIF2S3B,C3ORF38,TBL3,EIF3A,RESF1,RPS3A,TIMM13,CASP8AP2,RAB8A,TBCD,HN…
TF	Factor: ER71:SREBP-2; motif: NTSACGTGACGGAARY	TF:M08457	0.010010294214441797	1.9995531579022188	12171	255	181	19917	RPL41,UQCRHL,LSM8,APOC2,SUPT4H1,BCKDHA,DMAC1,GOLGA4,SAFB2,CNIH1,GOLGA3,ALMS1,SMG1,HDGFL2,SAFB,KCMF1,RPS14,CCDC88B,KIAA0232,SLC38A10,FKBP2,GTF2A2,ZNF638,ZNF207,SREK1,SCYL1,N4BP2,ZBTB37,LYPLA1,ANKRD36C,ATP5MG,NUMA1,NDUFS7,UPF1,ZNF37A,NONO,NIPBL,RANBP2,ANKRD12,KRI1,KIF7,MMADHC,MVD,RSF1,FKBP1A,CNIH4,GAK,KIAA1109,RIF1,CRTAP,GCC2,TCEAL4,PPIA,RPL23A,TIMM8B,CCDC137,COMMD4,MTX3,PNISR,TTBK2,NASP,PEX2,FAM50…
TF	Factor: GABP-alpha; motif: NACCGGAAGTN; match class: 1	TF:M11414_1	0.01086582029245862	1.963937481948991	444	255	15	19917	SUPT4H1,RPS14,FKBP2,GTF2A2,SREK1,SNRPG,GAK,AXIN1,INTS1,PAXX,WDR46,ZNF646,ASB1,DMAP1,RPA3
TF	Factor: E2F; motif: TTTCGCGC; match class: 1	TF:M00425_1	0.011191267271334732	1.951120732257587	5407	255	93	19917	RPL41,SUPT4H1,SELENOT,GOLGA4,CNIH1,GOLGA3,HDGFL2,CCDC88B,SLC38A10,ZNF638,ZNF207,CEP250,ATP5MG,NDUFS7,COX7C,UPF1,RANBP2,ANKRD12,KIF7,MMADHC,RSF1,CNIH4,GAK,GCC2,RPL23A,TIMM8B,COMMD4,NDUFC2,YWHAQ,PNISR,PTRHD1,TTBK2,NASP,PEX2,CEP131,PPP2CA,RRBP1,PSMC5,RPL15,UBXN7,ARFRP1,EIF3CL,CDK11B,PELP1,DAZAP1,RPL10A,MINDY2,EIF2S3B,C3ORF38,TBL3,EIF3A,ZGPAT,CASP8AP2,SDHAF4,RAB8A,TBCD,HNRNPLL,SMG6,SUGP2,SCAPER,SSR3,…
TF	Factor: sp4; motif: NNNGCYCCGCCCCCY; match class: 1	TF:M10530_1	0.011212830574303721	1.950284739980882	3799	255	70	19917	MAGED4,INO80D,SAFB2,SMG1,SAFB,KCMF1,CCDC88B,KIAA0232,FKBP2,ZNF627,ZNF207,SCYL1,ZBTB37,CEP250,NUMA1,ZNF652,ANKRD12,KRI1,KIF3A,UBTF,RSF1,CRTAP,OLA1,CTNNBL1,COMMD4,YWHAQ,NASP,FAM50A,CEP131,CNOT7,RAN,RRBP1,AXIN1,SAMD8,HTATSF1,CCDC9,TELO2,ARHGAP4,PAXX,WDR46,CASP8AP2,RAB8A,TBCD,CFAP410,SMG6,HELZ,DNAJC5,ATRAID,AKAP13,SLC25A5,RBM15,GRINA,GLB1,ZNF444,CMC4,ENGASE,IFT140,ATAD2B,HDAC4,CYTH2,FUNDC2,FLYWCH2,AR…
TF	Factor: E2F-1; motif: NNNSSCGCSAANN; match class: 1	TF:M07250_1	0.011469682143860689	1.940448617415219	5555	255	95	19917	SELENOT,SAFB2,HDGFL2,SAFB,CCDC88B,KIAA0232,SLC38A10,N4BP2,CEP250,LYPLA1,ANKRD36C,ATP5MG,NUMA1,UPF1,ZNF37A,RANBP2,KIF7,MVD,RSF1,RIF1,COMMD4,NASP,PEX2,FAM50A,CEP131,PPP2CA,CNOT7,RAN,RRBP1,PURA,RPL15,HTATSF1,ARFRP1,RER1,EIF3CL,CDK11B,PELP1,DAZAP1,RPL10A,TELO2,C3ORF38,TBL3,EIF3A,UBN2,TAF10,RESF1,ZGPAT,TIMM13,CASP8AP2,RAB8A,TBCD,UBE2D2,HNRNPLL,SMG6,SUGP2,CFL2,SCAPER,SSR3,CEP192,SNRNP70,ZNF646,ATRAID,A…
TF	Factor: ER81; motif: NACCGGAAGTN; match class: 1	TF:M11420_1	0.01148457473504004	1.9398850817615005	495	255	16	19917	SUPT4H1,RPS14,FKBP2,GTF2A2,SREK1,SNRPG,GAK,NASP,AXIN1,INTS1,PAXX,WDR46,ZNF646,ASB1,DMAP1,RPA3
TF	Factor: E2F2; motif: AAAAATGGCGCCAAAAWG	TF:M03958	0.01148457473504004	1.9398850817615005	10971	255	166	19917	RPL41,UQCRHL,LSM8,APOC2,SUPT4H1,SELENOT,BCKDHA,DMAC1,SAFB2,CNIH1,ALMS1,SMG1,HDGFL2,SAFB,POTEE,FKBP2,GTF2A2,ZNF638,ZNF207,SREK1,SCYL1,N4BP2,CEP250,ATP5MG,NDUFS7,SNRPG,COX7C,ZNF652,ZNF37A,NONO,RANBP2,TCEAL3,KRI1,MMADHC,MVD,GAK,KIAA1109,CRTAP,GCC2,OLA1,CTNNBL1,PPIA,RPL23A,POLD1,TIMM8B,COMMD4,NDUFC2,PNISR,PTRHD1,TTBK2,METTL16,NASP,PEX2,FAM50A,MBD3,ZNF221,CEP131,NFKBIL1,PPP2CA,SURF6,PSMC5,AXIN1,UBXN7,…
TF	Factor: TR4; motif: ACCCCGS	TF:M04934	0.01159155568300913	1.935858274199716	18272	255	247	19917	UQCRHL,LSM8,APOC2,SUPT4H1,MAGED4,SELENOT,BCKDHA,DMAC1,GOLGA4,INO80D,SAFB2,CNIH1,GOLGA3,ALMS1,SMG1,HDGFL2,SAFB,KCMF1,POTEE,RPS14,CCDC88B,KIAA0232,SLC38A10,FKBP2,GTF2A2,ZNF627,ZNF638,SREK1,SCYL1,N4BP2,ZBTB37,CEP250,LYPLA1,ANKRD36C,ATP5MG,NUMA1,NDUFS7,SNRPG,COX7C,UPF1,RBM6,ZNF37A,NONO,NIPBL,RANBP2,TCEAL3,ANKRD12,KRI1,KIF7,KIF3A,CSNK2A3,MMADHC,UBTF,MVD,RSF1,FKBP1A,CNIH4,GAK,KIAA1109,RIF1,CRTAP,LUC7L,…
TF	Factor: USF2; motif: NNNGGTCACGTGRYNN	TF:M09820	0.011811002122260352	1.927713252453881	2099	255	44	19917	UQCRHL,SMG1,POTEE,SREK1,SCYL1,ZBTB37,TCEAL3,ANKRD12,UBTF,TCEAL4,TIMM8B,COMMD4,PNISR,ANKS3,RAN,MACF1,DAZAP1,CCDC9,RGS12,MINDY2,EIF3A,TIMM13,SUGP2,CFL2,SCAPER,SSR3,SNRNP70,ATP5F1E,UBXN1,CANX,RBM15,DDX54,DOHH,HDAC4,TMEM241,TSR3,ANKRD23,THRAP3,ARHGAP45,TULP4,SLX1A,CKLF,MORC2,RPA3
TF	Factor: pax-2; motif: NCGTCACGCNYSRNYGCNYN	TF:M11877	0.01211492694877516	1.9166792002503292	11632	255	174	19917	UQCRHL,LSM8,APOC2,MAGED4,SELENOT,INO80D,SAFB2,GOLGA3,SMG1,HDGFL2,SAFB,POTEE,RPS14,FKBP2,GTF2A2,ZNF627,SREK1,SCYL1,N4BP2,ZBTB37,CEP250,LYPLA1,NUMA1,SNRPG,UPF1,ZNF652,RBM6,NIPBL,RANBP2,ANKRD12,KIF7,KIF3A,CSNK2A3,MMADHC,UBTF,MVD,FKBP1A,CNIH4,KIAA1109,RIF1,CRTAP,GCC2,OLA1,PPIA,RPL23A,POLD1,TIMM8B,NDUFC2,MTX3,TTC3,PTRHD1,TTBK2,NASP,PEX2,FAM50A,ELOC,RNF139,CEP131,PPP2CA,CNOT7,SURF6,RAN,EDF1,RRBP1,PURA,…
TF	Factor: E2F2; motif: AAAAATGGCGCCAAAAWG; match class: 1	TF:M03958_1	0.012634847173846067	1.898430006767948	4230	255	76	19917	RPL41,LSM8,APOC2,SUPT4H1,SELENOT,SAFB2,CNIH1,SMG1,SAFB,POTEE,GTF2A2,ZNF207,SREK1,CEP250,ATP5MG,COX7C,ZNF652,NONO,TCEAL3,MMADHC,KIAA1109,CRTAP,CTNNBL1,PPIA,COMMD4,NDUFC2,PNISR,NASP,FAM50A,NFKBIL1,PPP2CA,PSMC5,MOB1B,MACF1,TELO2,MINDY2,PCBP2,PSENEN,RPS3A,CASP8AP2,KIF5B,HELZ,SUGP2,HBE1,SCAPER,TLR1,CEP192,ZNF646,ATRAID,IGIP,UBXN1,CANX,EWSR1,DHX38,ZNF33A,GLB1,DOHH,HYPK,EVI5,ZBTB17,LUC7L3,SLK,ZNF721,BTG…
TF	Factor: Sp1; motif: NGGGGGCGGGGCCNGGGGGGGG	TF:M10071	0.012638392662570882	1.898308155655158	8550	255	135	19917	MAGED4,DMAC1,INO80D,GOLGA3,ALMS1,SMG1,HDGFL2,KCMF1,RPS14,CCDC88B,KIAA0232,FKBP2,ZNF627,SCYL1,CEP250,LYPLA1,ANKRD36C,NUMA1,COX7C,ZNF652,RBM6,NONO,ANKRD12,KRI1,KIF7,KIF3A,UBTF,MVD,RSF1,CRTAP,OLA1,TCEAL4,CTNNBL1,PPIA,POLD1,COMMD4,YWHAQ,MTX3,NASP,FAM50A,MBD3,RNF139,CEP131,NFKBIL1,CNOT7,RAN,EDF1,RRBP1,PURA,AXIN1,GRIPAP1,UBXN7,SAMD8,HTATSF1,RER1,EIF3CL,PELP1,ZNF707,GOLGB1,DAPK3,DAZAP1,CCDC9,TELO2,EIF2S…
TF	Factor: ELF3; motif: WACCCGGAAGTAN; match class: 1	TF:M03967_1	0.013196293390125426	1.8795480374510283	1986	255	42	19917	BCKDHA,GOLGA3,RPS14,CCDC88B,SLC38A10,FKBP2,GTF2A2,SREK1,ZBTB37,SNRPG,COX7C,MMADHC,GAK,GCC2,RPL23A,CCDC137,NASP,PEX2,PSMC5,AXIN1,SAMD8,RER1,CCDC9,TELO2,INTS1,C3ORF38,PSENEN,BMS1,PAXX,WDR46,TIMM13,ZNF646,SLC25A5,RBM15,CMC4,ATAD2B,ARHGAP45,DMAP1,ANTKMT,ZSWIM9,CAPZA1,RPA3
TF	Factor: YY1; motif: NGCCGCCATYTTGN; match class: 1	TF:M12275_1	0.013414826285332988	1.8724149468317577	1619	255	36	19917	RPL41,SAFB2,SAFB,POTEE,ZNF207,ATP5MG,NDUFS7,NONO,CSNK2A3,PPIA,PNISR,TTC3,PTRHD1,NASP,CHD2,RNF139,PPP2CA,PSMC5,RER1,MACF1,TBL3,EIF3A,UBN2,WDR46,RAB8A,ATRAID,CMC4,NACA2,LUC7L3,CLK1,DAZ1,USP34,RSRC2,CAPZA1,MORC2,MRFAP1
TF	Factor: ELF2; motif: CCCGGAARYN	TF:M02054	0.013626715773917095	1.8656088025022928	3087	255	59	19917	SUPT4H1,GOLGA3,KCMF1,RPS14,SLC38A10,FKBP2,GTF2A2,N4BP2,ZBTB37,SNRPG,NIPBL,FKBP1A,GAK,RPL23A,TIMM8B,MTX3,PNISR,NASP,PEX2,ZNF221,CEP131,AXIN1,ARFRP1,EIF3CL,DAPK3,CCDC9,MINDY2,INTS1,C3ORF38,PSENEN,PAXX,ZGPAT,WDR46,TIMM13,HNRNPLL,CFAP410,SSR3,ZNF646,RBM15,DHX38,ZNF444,ASB1,PPAN,CMC4,HYPK,ZBTB17,STK19,HDAC4,PAF1,TSR3,C6ORF47,DMAP1,MAGEF1,ANTKMT,DPP8,ZSWIM9,CCZ1B,CREBZF,RPA3
TF	Factor: ZNF697; motif: NTGGGCRTCGGC	TF:M05748	0.013653418306196837	1.8647586038858557	86	255	6	19917	ANKRD36C,AXIN1,GOLGB1,PPT1,DPP8,ARL5A
TF	Factor: Pax-5; motif: RRMSWGANWYCTNRAGCGKRACSRYNSM; match class: 1	TF:M00144_1	0.013771864847167305	1.8610072479785074	7203	255	117	19917	RPL41,APOC2,MAGED4,SAFB2,GOLGA3,ALMS1,SMG1,HDGFL2,SAFB,FKBP2,ZNF627,ZNF207,N4BP2,ATP5MG,NUMA1,NDUFS7,SNRPG,COX7C,UPF1,ZNF652,RBM6,RANBP2,TCEAL3,ANKRD12,KRI1,KIF3A,UBTF,MVD,GAK,RIF1,CRTAP,GCC2,PPIA,RPL23A,POLD1,CCDC137,YWHAQ,MTX3,PNISR,PTRHD1,TTBK2,PEX2,FAM50A,ELOC,ZNF221,RNF139,CEP131,RAN,PURA,RPL15,AXIN1,POLR2J3,HTATSF1,ARFRP1,EIF3CL,CDK11B,PELP1,ZNF707,DAPK3,DAZAP1,CCDC9,TELO2,RGS12,INTS1,ARHGE…
TF	Factor: Elk-1; motif: AACCGGAAGTR; match class: 1	TF:M01163_1	0.013801038242483472	1.8600882406987298	1093	255	27	19917	SUPT4H1,HDGFL2,FKBP2,GTF2A2,SNRPG,GCC2,RPL23A,TIMM8B,CCDC137,NASP,PSMC5,CDK11B,ZNF707,CCDC9,INTS1,PSENEN,EIF3A,PAXX,WDR46,HNRNPLL,ZNF646,LNPEP,DMAP1,FAM199X,SETD2,CAPZA1,RPA3
TF	Factor: ER81; motif: NNNGRCMGGAAGYRNNNNNNNS; match class: 1	TF:M09611_1	0.014428453061584865	1.8407802290472552	319	255	12	19917	FKBP2,SREK1,N4BP2,GAK,AXIN1,ASB1,PPAN,PTPN11,MAGEF1,ANTKMT,RAI1,RPA3
TF	Factor: ELK1; motif: NACTTCCGSCGGAAGYN; match class: 1	TF:M03971_1	0.01506026819436791	1.8221672941182563	7220	255	117	19917	RPL41,APOC2,SUPT4H1,BCKDHA,INO80D,SAFB2,GOLGA3,SMG1,HDGFL2,SAFB,KCMF1,RPS14,KIAA0232,FKBP2,SREK1,N4BP2,ZBTB37,LYPLA1,ANKRD36C,ATP5MG,NDUFS7,UPF1,ZNF37A,NONO,NIPBL,RANBP2,TCEAL3,KRI1,KIF7,UBTF,RSF1,FKBP1A,GAK,CRTAP,TCEAL4,CTNNBL1,PPIA,RPL23A,TIMM8B,NDUFC2,PTRHD1,FAM50A,MBD3,ELOC,ZNF221,CEP131,PPP2CA,CNOT7,SURF6,RAN,RRBP1,PSMC5,RPL15,UBXN7,HTATSF1,ARFRP1,RER1,GOLGB1,DAZAP1,CCDC9,MINDY2,INTS1,C3ORF3…
TF	Factor: Sp2; motif: NYSGCCCCGCCCCCY	TF:M03567	0.01506026819436791	1.8221672941182563	7746	255	124	19917	MAGED4,DMAC1,INO80D,GOLGA3,ALMS1,SMG1,HDGFL2,KCMF1,CCDC88B,KIAA0232,SLC38A10,FKBP2,GTF2A2,ZNF627,SCYL1,CEP250,LYPLA1,ANKRD36C,NUMA1,COX7C,RBM6,ZNF37A,NONO,NIPBL,ANKRD12,KRI1,KIF7,KIF3A,UBTF,MVD,RSF1,RIF1,CRTAP,GCC2,OLA1,CTNNBL1,PPIA,POLD1,COMMD4,YWHAQ,MTX3,NASP,FAM50A,MBD3,RNF139,CEP131,NFKBIL1,CNOT7,SURF6,RAN,EDF1,RRBP1,PURA,AXIN1,UBXN7,SAMD8,HTATSF1,RER1,EIF3CL,PELP1,ZNF707,DAPK3,DAZAP1,CCDC9,T…
TF	Factor: ELF3; motif: WACCCGGAAGTAN	TF:M03967	0.015127042003743674	1.8202459871813825	7672	255	123	19917	RPL41,SUPT4H1,SELENOT,BCKDHA,DMAC1,GOLGA4,GOLGA3,RPS14,CCDC88B,SLC38A10,FKBP2,GTF2A2,SREK1,ZBTB37,ATP5MG,NUMA1,SNRPG,COX7C,ZNF652,NONO,NIPBL,TCEAL3,KRI1,MMADHC,GAK,RIF1,GCC2,RPL23A,TIMM8B,CCDC137,YWHAQ,MTX3,PNISR,TTC3,NASP,PEX2,ELOC,ZNF221,SREK1IP1,CEP131,PPP2CA,ANKS3,CNOT7,EDF1,RRBP1,PSMC5,AXIN1,POLR2J3,SAMD8,ARFRP1,RER1,EIF3CL,CDK11B,ZNF707,DAPK3,DAZAP1,CCDC9,TELO2,RGS12,MINDY2,INTS1,C3ORF38,AR…
TF	Factor: Fli-1; motif: NACCGGAARTN	TF:M11402	0.016226800172066902	1.789767112005096	3924	255	71	19917	SUPT4H1,CNIH1,GOLGA3,HDGFL2,RPS14,SLC38A10,FKBP2,GTF2A2,N4BP2,ZBTB37,RBM6,NIPBL,FKBP1A,GAK,GCC2,RPL23A,TIMM8B,MTX3,PNISR,NASP,CHD2,PEX2,ZNF221,CEP131,NFKBIL1,AXIN1,POLR2J3,SAMD8,ARFRP1,EIF3CL,CDK11B,GOLGB1,DAPK3,CCDC9,MINDY2,INTS1,C3ORF38,PSENEN,PAXX,ZGPAT,WDR46,TIMM13,RAB8A,HNRNPLL,DNAJC5,SSR3,OSER1,ZNF646,CANX,RBM15,DHX38,ASB1,PPAN,CMC4,HYPK,ZBTB17,STK19,PAF1,TSR3,ANKRD23,PPT1,DMAP1,FCHSD2,FAM1…
TF	Factor: E2F-4; motif: NNTTCCCGCCNN; match class: 1	TF:M04823_1	0.016570244421426024	1.7806710854193066	7916	255	126	19917	LSM8,SUPT4H1,MAGED4,INO80D,SAFB2,GOLGA3,ALMS1,HDGFL2,SAFB,KCMF1,KIAA0232,FKBP2,ZNF627,ZNF638,ZNF207,SCYL1,N4BP2,CEP250,ANKRD36C,NUMA1,UPF1,RBM6,ZNF37A,KRI1,KIF7,UBTF,MVD,RSF1,GAK,RIF1,LUC7L,OLA1,PPIA,POLD1,CCDC137,COMMD4,YWHAQ,PTRHD1,TTBK2,NASP,FAM50A,ELOC,CEP131,NFKBIL1,PPP2CA,RAN,RRBP1,PURA,PSMC5,AXIN1,UBXN7,POLR2J3,SAMD8,ARFRP1,RER1,DAZAP1,CCDC9,RPL10A,TELO2,MINDY2,INTS1,ARHGAP4,UBN2,PAXX,TAF1…
TF	Factor: Erm; motif: NRCMGGAAGTN; match class: 1	TF:M11422_1	0.01696860838068926	1.7703537733198969	940	255	24	19917	SUPT4H1,RPS14,FKBP2,GTF2A2,SREK1,SNRPG,GAK,CCDC137,NASP,AXIN1,RER1,CDK11B,ZNF707,CCDC9,INTS1,PSENEN,PAXX,WDR46,TIMM13,ZNF646,ASB1,PPAN,DMAP1,RPA3
TF	Factor: KLF3; motif: NNNNNNGGGCGGGGCNNGN	TF:M09970	0.017014232290816503	1.769187642182866	7770	255	124	19917	RPL41,MAGED4,INO80D,GOLGA3,ALMS1,SMG1,HDGFL2,KCMF1,CCDC88B,KIAA0232,SLC38A10,FKBP2,GTF2A2,ZNF627,SCYL1,CEP250,LYPLA1,ANKRD36C,NUMA1,COX7C,RBM6,NONO,NIPBL,ANKRD12,KRI1,KIF7,KIF3A,MVD,RSF1,RIF1,CRTAP,OLA1,PPIA,POLD1,COMMD4,YWHAQ,MTX3,PTRHD1,NASP,FAM50A,MBD3,CEP131,NFKBIL1,CNOT7,SURF6,RAN,EDF1,RRBP1,PURA,AXIN1,UBXN7,SAMD8,HTATSF1,RER1,PELP1,ZNF707,DAPK3,DAZAP1,CCDC9,TELO2,EIF2S3B,INTS1,ARHGAP4,PSENE…
TF	Factor: NFATc4; motif: NTTTCCRYGGAAAN; match class: 1	TF:M11994_1	0.01795891210467131	1.745719975087876	36	255	4	19917	UQCRHL,CYTH1,UBN2,SRPRB
TF	Factor: BTEB3; motif: CCNNSCCNSCCCCKCCCCC; match class: 1	TF:M09826_1	0.018270608813120332	1.7382469808481527	7557	255	121	19917	MAGED4,DMAC1,INO80D,SMG1,HDGFL2,KCMF1,POTEE,CCDC88B,KIAA0232,SLC38A10,FKBP2,ZNF627,SCYL1,N4BP2,ZBTB37,CEP250,LYPLA1,COX7C,ZNF652,NONO,ANKRD12,KRI1,KIF7,KIF3A,UBTF,MVD,RSF1,KIAA1109,CRTAP,OLA1,CTNNBL1,PPIA,YWHAQ,NASP,CHD2,FAM50A,MBD3,ELOC,RNF139,CEP131,NFKBIL1,CNOT7,RAN,EDF1,RRBP1,PURA,AXIN1,GRIPAP1,POLR2J3,SAMD8,HTATSF1,ARFRP1,MOB1B,ZNF707,DAPK3,DAZAP1,CCDC9,TELO2,MINDY2,EIF2S3B,C3ORF38,ARHGAP4,P…
TF	Factor: C/EBPgamma; motif: NNTTGCGYAANN	TF:M11325	0.018332626559034254	1.7367753081760453	2731	255	53	19917	BCKDHA,SAFB2,HDGFL2,FKBP2,ZNF638,NUMA1,NDUFS7,ZNF37A,RANBP2,KRI1,FKBP1A,GCC2,NASP,CHD2,SREK1IP1,NFKBIL1,ANKS3,CNOT7,RRBP1,RPL15,GRIPAP1,PELP1,CCDC9,RPL10A,MINDY2,INTS1,ARHGEF18,TBL3,RPS3A,SDHAF4,BDP1,SUGP2,TLR1,SRPRB,RNF2,ZNF444,NXF1,IFT140,BTG1,HDAC4,THRAP3,CYTH2,CLK1,DAZ1,DMAP1,MAGEF1,RSRC2,PPP1R26,NSMCE2,CAPZA1,CCZ1B,MORC2,RPA3
TF	Factor: LHX4; motif: NNCRTTAN	TF:M11005	0.018364397153046743	1.7360233236433509	10745	255	162	19917	LSM8,SUPT4H1,SELENOT,BCKDHA,DMAC1,GOLGA4,SAFB2,CNIH1,ALMS1,SMG1,HDGFL2,SAFB,KCMF1,POTEE,RPS14,KIAA0232,GTF2A2,ZNF627,ZNF638,ZNF207,SREK1,ZBTB37,CEP250,ANKRD36C,ATP5MG,NUMA1,NDUFS7,SNRPG,ZNF652,RBM6,ZNF37A,NONO,NIPBL,RANBP2,TCEAL3,ANKRD12,KRI1,KIF7,CSNK2A3,MMADHC,UBTF,MVD,RSF1,GAK,KIAA1109,RIF1,CRTAP,LUC7L,TCEAL4,CTNNBL1,PPIA,POLD1,TIMM8B,NDUFC2,YWHAQ,MTX3,PNISR,TTC3,PTRHD1,TTBK2,METTL16,NASP,CHD2…
TF	Factor: Pax-6; motif: TTTCACGCWTGANTGMNYN; match class: 1	TF:M04065_1	0.018704700559997834	1.728049239948082	3604	255	66	19917	LSM8,SUPT4H1,BCKDHA,DMAC1,GOLGA3,SMG1,FKBP2,GTF2A2,ZNF627,ZNF638,ATP5MG,NUMA1,SNRPG,NIPBL,KRI1,KIF3A,CSNK2A3,UBTF,FKBP1A,CNIH4,GAK,OLA1,PPIA,RPL23A,CCDC137,NDUFC2,NASP,ZNF221,RNF139,CEP131,SURF6,RAN,PURA,HTATSF1,EIF3CL,ZNF707,GOLGB1,TELO2,RGS12,EIF2S3B,INTS1,C3ORF38,CYTH1,TBL3,PAXX,RPS3A,TBCD,KIF5B,SCAPER,SSR3,IGIP,ATP5F1E,GRINA,ZNF33A,ZNF444,RNASE10,CMC4,HYPK,ATAD2B,HDAC4,ANKRD23,FUNDC2,DMAP1,CK…
TF	Factor: hoxa9; motif: RTCGTWANNN; match class: 1	TF:M10785_1	0.01913025661183254	1.7182792043399073	1178	255	28	19917	LSM8,DMAC1,CNIH1,SNRPG,MVD,LUC7L,CTNNBL1,TTC3,PTRHD1,TTBK2,NASP,PPP2CA,EIF2S3B,C3ORF38,ARHGEF18,KIF5B,SSR3,RNF2,NCK1,LUC7L3,SLK,HDAC4,CLK1,RBM12B,RSRC2,NSMCE2,FAM184A,CAPZA1
TF	Factor: MTF-1; motif: TGCGCAC	TF:M01243	0.01913025661183254	1.7182792043399073	2869	255	55	19917	LSM8,MAGED4,BCKDHA,SAFB2,CNIH1,SAFB,CEP250,NDUFS7,COX7C,RANBP2,KRI1,KIF3A,MMADHC,FKBP1A,CRTAP,GCC2,NDUFC2,PNISR,TTBK2,METTL16,CEP131,PPP2CA,PSMC5,UBXN7,POLR2J3,ARFRP1,CDK11B,PELP1,DAZAP1,ARHGEF18,UBN2,ZGPAT,TIMM13,RAB8A,CFAP410,SMG6,SUGP2,SSR3,OSER1,SNRNP70,ZNF646,AKAP13,ZNF444,PPAN,ENGASE,NXF1,HDAC4,LNPEP,FUNDC2,RBM12B,USP34,CKLF,PPP1R26,RAI1,ARL5A
TF	Factor: MOVO-B; motif: GNGGGGG; match class: 1	TF:M01104_1	0.019446679180213762	1.7111545504740906	5650	255	95	19917	SUPT4H1,MAGED4,GOLGA4,GOLGA3,SMG1,HDGFL2,KCMF1,POTEE,KIAA0232,SLC38A10,FKBP2,N4BP2,CEP250,LYPLA1,ANKRD36C,UPF1,ZNF652,NIPBL,TCEAL3,ANKRD12,UBTF,MVD,RSF1,LUC7L,PPIA,POLD1,YWHAQ,MTX3,METTL16,FAM50A,MBD3,RNF139,CEP131,PURA,AXIN1,UBXN7,SAMD8,HTATSF1,ARFRP1,RER1,EIF3CL,DAPK3,DAZAP1,CCDC9,INTS1,ARHGAP4,TBL3,UBN2,ZGPAT,TIMM13,RAB8A,TBCD,HNRNPLL,KIF5B,SMG6,HELZ,SUGP2,DNAJC5,CFL2,CEP192,SRPRB,RNF2,AKAP13,…
TF	Factor: RUNX2; motif: WRACCGCANWAACCGCAN	TF:M04107	0.020335700502590086	1.69174086288715	12479	255	183	19917	RPL41,LSM8,APOC2,GOLGA4,INO80D,SAFB2,CNIH1,GOLGA3,ALMS1,SMG1,HDGFL2,SAFB,KCMF1,POTEE,KIAA0232,SLC38A10,FKBP2,GTF2A2,ZNF627,ZNF638,ZNF207,SREK1,SCYL1,N4BP2,ZBTB37,CEP250,LYPLA1,ANKRD36C,NUMA1,SNRPG,UPF1,ZNF652,RBM6,NIPBL,RANBP2,ANKRD12,KRI1,KIF7,KIF3A,CSNK2A3,UBTF,MVD,FKBP1A,GAK,KIAA1109,RIF1,CRTAP,LUC7L,GCC2,OLA1,TCEAL4,CTNNBL1,PPIA,POLD1,TIMM8B,CCDC137,NDUFC2,MTX3,PNISR,PTRHD1,NASP,FAM50A,MBD3,E…
TF	Factor: GABP; motif: CACTTCCGGNNN; match class: 1	TF:M01258_1	0.02054037635302993	1.687391603263242	428	255	14	19917	SLC38A10,FKBP2,GTF2A2,AXIN1,ARFRP1,ZGPAT,WDR46,TIMM13,SUGP2,ZNF646,ASB1,PPAN,DMAP1,RPA3
TF	Factor: BTEB3; motif: BNRNGGGAGGNGT	TF:M01865	0.020808601290416284	1.6817571111516283	9976	255	152	19917	MAGED4,SELENOT,CNIH1,ALMS1,SMG1,HDGFL2,KCMF1,POTEE,RPS14,KIAA0232,SLC38A10,GTF2A2,ZNF627,ZNF638,ZNF207,SREK1,N4BP2,ZBTB37,LYPLA1,ANKRD36C,NUMA1,NDUFS7,COX7C,ZNF652,RBM6,ZNF37A,NONO,NIPBL,RANBP2,ANKRD12,KRI1,KIF7,MMADHC,UBTF,RSF1,KIAA1109,RIF1,LUC7L,GCC2,OLA1,TCEAL4,CTNNBL1,PPIA,RPL23A,POLD1,YWHAQ,PTRHD1,TTBK2,METTL16,NASP,CHD2,PEX2,ELOC,SREK1IP1,RNF139,CEP131,NFKBIL1,PPP2CA,SURF6,RAN,RRBP1,PSMC5,…
TF	Factor: Sp1; motif: GGGGCGGGGC	TF:M07063	0.020829708141889572	1.681316815182108	7736	255	123	19917	SUPT4H1,MAGED4,DMAC1,INO80D,GOLGA3,SMG1,HDGFL2,KCMF1,POTEE,KIAA0232,SLC38A10,FKBP2,ZNF627,SCYL1,CEP250,LYPLA1,NUMA1,COX7C,RBM6,ZNF37A,NONO,ANKRD12,KRI1,KIF7,KIF3A,UBTF,MVD,RSF1,RIF1,CRTAP,OLA1,CTNNBL1,PPIA,POLD1,CCDC137,COMMD4,YWHAQ,MTX3,NASP,FAM50A,MBD3,RNF139,CEP131,NFKBIL1,CNOT7,SURF6,RAN,EDF1,RRBP1,PURA,AXIN1,GRIPAP1,UBXN7,SAMD8,HTATSF1,EIF3CL,ZNF707,DAPK3,DAZAP1,CCDC9,TELO2,EIF2S3B,INTS1,C3O…
TF	Factor: Sp2; motif: GGGGCGGGG	TF:M10435	0.020829708141889572	1.681316815182108	7736	255	123	19917	SUPT4H1,MAGED4,DMAC1,INO80D,GOLGA3,SMG1,HDGFL2,KCMF1,POTEE,KIAA0232,SLC38A10,FKBP2,ZNF627,SCYL1,CEP250,LYPLA1,NUMA1,COX7C,RBM6,ZNF37A,NONO,ANKRD12,KRI1,KIF7,KIF3A,UBTF,MVD,RSF1,RIF1,CRTAP,OLA1,CTNNBL1,PPIA,POLD1,CCDC137,COMMD4,YWHAQ,MTX3,NASP,FAM50A,MBD3,RNF139,CEP131,NFKBIL1,CNOT7,SURF6,RAN,EDF1,RRBP1,PURA,AXIN1,GRIPAP1,UBXN7,SAMD8,HTATSF1,EIF3CL,ZNF707,DAPK3,DAZAP1,CCDC9,TELO2,EIF2S3B,INTS1,C3O…
TF	Factor: LIM-1; motif: NNCGTTAN	TF:M10999	0.020955323352749862	1.678705633363589	5955	255	99	19917	LSM8,SUPT4H1,SELENOT,DMAC1,SAFB2,HDGFL2,SAFB,RPS14,GTF2A2,ZNF207,ZBTB37,CEP250,ANKRD36C,NUMA1,NDUFS7,SNRPG,ZNF652,ZNF37A,NIPBL,RANBP2,TCEAL3,KIF7,MMADHC,UBTF,GAK,KIAA1109,RIF1,LUC7L,PPIA,POLD1,TIMM8B,NDUFC2,PNISR,TTC3,PTRHD1,TTBK2,METTL16,CHD2,PEX2,ELOC,CEP131,NFKBIL1,PPP2CA,SURF6,PURA,RER1,CDK11B,PELP1,ZNF707,DAPK3,MACF1,FAM71D,ARHGEF18,EIF3A,UBN2,TAF10,RESF1,TIMM13,RAB8A,TBCD,CFAP410,SMG6,HELZ,…
TF	Factor: RUNX3; motif: NRACCGCAAACCGCAN; match class: 1	TF:M04109_1	0.02123360289944907	1.6729763088678231	3899	255	70	19917	RPL41,APOC2,INO80D,HDGFL2,KCMF1,POTEE,CCDC88B,ZNF627,SCYL1,N4BP2,ANKRD36C,NDUFS7,UPF1,ANKRD12,MVD,FKBP1A,GAK,OLA1,PPIA,COMMD4,PTRHD1,METTL16,ZNF221,CNOT7,SURF6,RAN,RRBP1,PSMC5,RPL15,ARFRP1,PELP1,DAPK3,RPL10A,TELO2,INTS1,UBN2,BMS1,ZGPAT,WDR46,RAB8A,TBCD,HNRNPLL,SMG6,SUGP2,SCAPER,SNRNP70,ZNF646,AKAP13,RBM15,GRINA,CMC4,ATAD2B,BTG1,HDAC4,LNPEP,FLYWCH2,ARHGAP45,DAZ1,USP34,MAGEF1,ANTKMT,ZSWIM9,PPP1R26,…
TF	Factor: REX-1; motif: GGCMGCCATTTT; match class: 1	TF:M10119_1	0.02123360289944907	1.6729763088678231	166	255	8	19917	SAFB2,SAFB,CSNK2A3,PNISR,PTRHD1,ATRAID,CLK1,DAZ1
TF	Factor: YY1; motif: NYNKCCATNTT	TF:M01035	0.02123360289944907	1.6729763088678231	5958	255	99	19917	RPL41,UQCRHL,LSM8,BCKDHA,GOLGA4,SAFB2,SAFB,ZNF627,ZNF638,ZNF207,SREK1,CEP250,ATP5MG,NUMA1,NDUFS7,COX7C,UPF1,NONO,RANBP2,ANKRD12,KRI1,CSNK2A3,MMADHC,RSF1,CNIH4,RIF1,TCEAL4,PPIA,RPL23A,CCDC137,COMMD4,MTX3,PNISR,TTC3,PTRHD1,METTL16,NASP,CHD2,SREK1IP1,RNF139,PPP2CA,RAN,PSMC5,RPL15,GRIPAP1,UBXN7,HTATSF1,RER1,EIF3CL,CDK11B,PELP1,EIF2S3B,FAM71D,ARHGAP4,TBL3,PSENEN,UBN2,CASP8AP2,RAB8A,BDP1,KIF5B,SMG6,HEL…
TF	Factor: Net; motif: NRCCGGAAGTN; match class: 1	TF:M11439_1	0.021477190333956536	1.6680225340651498	383	255	13	19917	RPS14,FKBP2,GTF2A2,GAK,AXIN1,PAXX,WDR46,TIMM13,ZNF646,ASB1,PPAN,DMAP1,RPA3
TF	Factor: ESE-1; motif: ACCCGGAAGTRNNNNNNNWWWWW	TF:M11384	0.02243119828863554	1.649147525514599	3294	255	61	19917	RPL41,BCKDHA,DMAC1,RPS14,CCDC88B,SLC38A10,GTF2A2,SREK1,ZBTB37,ATP5MG,SNRPG,ZNF37A,NONO,TCEAL3,GAK,GCC2,RPL23A,TIMM8B,CCDC137,MTX3,PNISR,NASP,PEX2,ELOC,CEP131,PSMC5,POLR2J3,SAMD8,EIF3CL,ZNF707,DAZAP1,CCDC9,TELO2,PCBP2,ARHGAP4,PSENEN,TAF10,RESF1,WDR46,TIMM13,KIF5B,SSR3,ZNF646,UBXN1,SLC25A5,DHX38,CMC4,SLK,PTPN11,TMEM241,TSR3,ARHGAP45,DMAP1,TULP4,DPP8,ZSWIM9,CAPZA1,CCZ1B,MORC2,CREBZF,RPA3
TF	Factor: SAP-1; motif: NTCGTAAATGCN	TF:M11438	0.02243119828863554	1.649147525514599	5969	255	99	19917	RPL41,LSM8,MAGED4,DMAC1,SAFB2,CNIH1,SAFB,KCMF1,FKBP2,ZNF207,SREK1,LYPLA1,ATP5MG,SNRPG,COX7C,UPF1,ZNF37A,NONO,NIPBL,RANBP2,ANKRD12,CSNK2A3,MVD,FKBP1A,GCC2,PPIA,RPL23A,POLD1,TIMM8B,COMMD4,NDUFC2,MTX3,PTRHD1,TTBK2,PEX2,RNF139,ANKS3,CNOT7,RPL15,POLR2J3,HTATSF1,MOB1B,RER1,EIF3CL,GOLGB1,DAZAP1,CCDC9,TELO2,EIF2S3B,C3ORF38,PSENEN,BMS1,TAF10,RESF1,WDR46,TIMM13,SDHAF4,RAB8A,KIF5B,HELZ,DNAJC5,CFL2,SCAPER,SS…
TF	Factor: Spi-B; motif: NAWGCGGAAGTN	TF:M11375	0.02243119828863554	1.649147525514599	2629	255	51	19917	RPL41,APOC2,SUPT4H1,BCKDHA,DMAC1,POTEE,CCDC88B,SLC38A10,ATP5MG,NDUFS7,ZNF37A,NIPBL,KIF3A,GCC2,RPL23A,POLD1,CCDC137,NDUFC2,YWHAQ,PNISR,PTRHD1,ELOC,ZNF221,RRBP1,PSMC5,RPL15,MOB1B,RER1,ZNF707,C3ORF38,UBN2,BMS1,RPS3A,KIF5B,HELZ,CEP192,ZNF646,UBXN1,GLB1,RNASE10,CMC4,ZNF721,TSR3,DMAP1,SLX1A,MAGEF1,RSRC2,CCHCR1,RAI1,KCNS3,CCZ1B
TF	Factor: Egr-1; motif: NNCRCCCMCGCNN	TF:M12140	0.022566883946193533	1.6465284045199566	5391	255	91	19917	APOC2,SUPT4H1,MAGED4,SAFB2,GOLGA3,SAFB,KCMF1,POTEE,CCDC88B,FKBP2,ZNF638,ZNF207,SCYL1,N4BP2,ATP5MG,NUMA1,COX7C,ZNF652,NIPBL,ANKRD12,KRI1,GCC2,PPIA,POLD1,CCDC137,YWHAQ,MTX3,METTL16,NASP,PEX2,MBD3,CEP131,RAN,PURA,AXIN1,UBXN7,SAMD8,ARFRP1,RER1,GOLGB1,DAPK3,DAZAP1,CCDC9,TELO2,INTS1,ARHGAP4,PSENEN,UBN2,PAXX,ZGPAT,RAB8A,TBCD,BDP1,HNRNPLL,CFAP410,HELZ,DNAJC5,CFL2,SSR3,SNRNP70,ZNF646,AKAP13,ATP5F1E,SLC25A…
TF	Factor: E2F-4:DP-1; motif: TTTSGCGC; match class: 1	TF:M00738_1	0.022735891239649912	1.64328801692069	4050	255	72	19917	RPL41,SUPT4H1,SELENOT,DMAC1,GOLGA3,HDGFL2,POTEE,RPS14,ZNF627,ZNF638,N4BP2,CEP250,ATP5MG,NUMA1,NDUFS7,COX7C,RANBP2,KIF7,COMMD4,NDUFC2,PTRHD1,TTBK2,METTL16,NASP,PEX2,MBD3,CEP131,CNOT7,PURA,PSMC5,RPL15,POLR2J3,HTATSF1,EIF3CL,CDK11B,PELP1,DAZAP1,TELO2,MINDY2,C3ORF38,EIF3A,RPS3A,CASP8AP2,SDHAF4,RAB8A,TBCD,HNRNPLL,CFL2,SCAPER,SSR3,CEP192,SNRNP70,ZNF646,ATRAID,EWSR1,ZNF33A,ZNF444,ASB1,NCK1,NXF1,IFT140,C…
TF	Factor: SP1:SP3; motif: CCSCCCCCYCC	TF:M01219	0.022735891239649912	1.64328801692069	6856	255	111	19917	MAGED4,DMAC1,INO80D,SAFB2,SMG1,HDGFL2,SAFB,KCMF1,RPS14,KIAA0232,SLC38A10,FKBP2,ZNF627,ZNF638,SCYL1,N4BP2,ZBTB37,CEP250,LYPLA1,NUMA1,ZNF652,NIPBL,ANKRD12,KIF7,UBTF,RSF1,RIF1,GCC2,CTNNBL1,PPIA,POLD1,COMMD4,YWHAQ,PNISR,PTRHD1,TTBK2,NASP,MBD3,RNF139,NFKBIL1,PPP2CA,CNOT7,EDF1,PURA,RPL15,AXIN1,GRIPAP1,UBXN7,POLR2J3,SAMD8,HTATSF1,MOB1B,CDK11B,DAPK3,DAZAP1,CCDC9,TELO2,TBL3,EIF3A,UBN2,PAXX,TAF10,WDR46,TBC…
TF	Factor: USF2; motif: NGGTCACGTGNNSNNNNNN	TF:M09670	0.0232833318222357	1.632954872455348	2374	255	47	19917	UQCRHL,DMAC1,KIAA0232,ZNF207,SREK1,SCYL1,ZBTB37,CEP250,TCEAL3,ANKRD12,UBTF,TCEAL4,TIMM8B,COMMD4,PNISR,ANKS3,RAN,MACF1,DAZAP1,RGS12,MINDY2,EIF3A,TIMM13,SUGP2,CFL2,SCAPER,SSR3,SNRNP70,ATP5F1E,UBXN1,CANX,EWSR1,RBM15,DDX54,DOHH,HDAC4,TMEM241,TSR3,ANKRD23,THRAP3,ARHGAP45,PPT1,SLX1A,PPP1R26,NSMCE2,CCZ1B,MORC2
TF	Factor: C/EBPbeta; motif: NRTTGCGYAAYN; match class: 1	TF:M11316_1	0.023578003303035652	1.6274929757969088	2768	255	53	19917	RPL41,LSM8,SAFB2,GOLGA3,HDGFL2,RPS14,KIAA0232,FKBP2,ZNF638,SREK1,CEP250,NDUFS7,FKBP1A,GCC2,PTRHD1,TTBK2,CHD2,PEX2,SREK1IP1,RNF139,RRBP1,RPL15,GRIPAP1,CDK11B,GOLGB1,CCDC9,EIF2S3B,INTS1,ARHGAP4,UBN2,RESF1,RPS3A,BDP1,SMG6,SUGP2,SSR3,SRPRB,RNF2,OSER1,NACA2,NXF1,PTPN11,BTG1,HDAC4,CYTH2,FUNDC2,ARHGAP45,DAZ1,PPT1,DMAP1,MAGEF1,ARL5A,RPA3
TF	Factor: CPBP; motif: SNCCCNN; match class: 1	TF:M01822_1	0.023611339391048564	1.6268793761723304	18835	255	251	19917	RPL41,UQCRHL,LSM8,APOC2,SUPT4H1,MAGED4,SELENOT,BCKDHA,DMAC1,GOLGA4,INO80D,SAFB2,CNIH1,GOLGA3,ALMS1,SMG1,HDGFL2,SAFB,KCMF1,POTEE,RPS14,CCDC88B,KIAA0232,SLC38A10,FKBP2,GTF2A2,ZNF627,ZNF638,ZNF207,SREK1,SCYL1,N4BP2,ZBTB37,CEP250,LYPLA1,ANKRD36C,ATP5MG,NUMA1,NDUFS7,SNRPG,COX7C,UPF1,ZNF652,RBM6,ZNF37A,NONO,NIPBL,RANBP2,TCEAL3,ANKRD12,KRI1,KIF7,KIF3A,CSNK2A3,MMADHC,UBTF,MVD,RSF1,FKBP1A,CNIH4,GAK,KIAA11…
TF	Factor: E2F-4:DP-2; motif: TTTCSCGC; match class: 1	TF:M00739_1	0.023711741186667686	1.6250365539932545	1199	255	28	19917	ZNF638,N4BP2,UBTF,PPIA,NASP,MBD3,RPL15,POLR2J3,PELP1,DAZAP1,TELO2,CASP8AP2,TBCD,HNRNPLL,KIF5B,CFL2,SNRNP70,ATRAID,EWSR1,ZNF444,ASB1,BTG1,HDAC4,FCHSD2,ZSWIM9,FAM184A,CREBZF,RPA3
TF	Factor: Sp1; motif: CCCCGCCCCN; match class: 1	TF:M00933_1	0.024416907042166536	1.6123093502024852	5191	255	88	19917	MAGED4,DMAC1,INO80D,GOLGA3,SMG1,HDGFL2,KCMF1,KIAA0232,FKBP2,ZNF627,SCYL1,CEP250,NUMA1,COX7C,NONO,ANKRD12,KRI1,KIF3A,UBTF,MVD,RSF1,CRTAP,PPIA,POLD1,COMMD4,YWHAQ,NASP,CHD2,FAM50A,MBD3,CEP131,NFKBIL1,CNOT7,RAN,RRBP1,PURA,AXIN1,SAMD8,HTATSF1,EIF3CL,DAPK3,CCDC9,TELO2,EIF2S3B,INTS1,ARHGAP4,PAXX,WDR46,CASP8AP2,TBCD,UBE2D2,CFAP410,SMG6,HELZ,DNAJC5,SCAPER,RNF2,OSER1,ATRAID,AKAP13,EWSR1,RBM15,GRINA,PRAME,Z…
TF	Factor: E2F-3:FOXO6; motif: NAATGACACGCGCCCMC; match class: 1	TF:M08209_1	0.024592599626671083	1.6091955605722228	7849	255	124	19917	RPL41,MAGED4,SELENOT,GOLGA4,SAFB2,GOLGA3,HDGFL2,SAFB,KCMF1,POTEE,KIAA0232,SLC38A10,FKBP2,GTF2A2,ZNF627,SCYL1,ZBTB37,LYPLA1,ANKRD36C,ATP5MG,NUMA1,COX7C,UPF1,ZNF652,NIPBL,ANKRD12,KRI1,KIF7,UBTF,RSF1,FKBP1A,CNIH4,RIF1,OLA1,PPIA,RPL23A,CCDC137,TTBK2,METTL16,NASP,FAM50A,ZNF221,RNF139,CEP131,PPP2CA,SURF6,EDF1,RRBP1,PURA,PSMC5,AXIN1,POLR2J3,HTATSF1,ARFRP1,RER1,CDK11B,ZNF707,DAPK3,DAZAP1,CCDC9,TELO2,MIND…
TF	Factor: Elk-1:HOXA3; motif: ACCGGWAATKRNNTNWCNNATTAN; match class: 1	TF:M08220_1	0.024685490062758813	1.6075582466320404	5409	255	91	19917	APOC2,SELENOT,BCKDHA,GOLGA4,INO80D,CNIH1,HDGFL2,KCMF1,RPS14,KIAA0232,SLC38A10,FKBP2,ZNF627,ZNF638,ZNF207,LYPLA1,ANKRD36C,NUMA1,SNRPG,COX7C,RANBP2,KIF7,CSNK2A3,MVD,RSF1,CNIH4,GAK,RIF1,CCDC137,COMMD4,NDUFC2,MTX3,PNISR,PTRHD1,TTBK2,METTL16,NASP,PEX2,ZNF221,SREK1IP1,NFKBIL1,PPP2CA,PSMC5,RPL15,UBXN7,SAMD8,HTATSF1,RER1,CDK11B,GOLGB1,RPL10A,FAM71D,PCBP2,INTS1,TBL3,BMS1,RESF1,RPS3A,WDR46,TIMM13,HNRNPLL,D…
TF	Factor: Pbx1; motif: NTGATKGACG	TF:M11038	0.02543934097062371	1.5944941436733409	4559	255	79	19917	MAGED4,HDGFL2,POTEE,CCDC88B,ZNF627,CEP250,NDUFS7,ZNF652,RBM6,ZNF37A,TCEAL3,ANKRD12,KIF3A,MVD,GAK,KIAA1109,LUC7L,GCC2,NDUFC2,PTRHD1,TTBK2,CHD2,PEX2,MBD3,RNF139,CEP131,NFKBIL1,CNOT7,EDF1,RPL15,ARFRP1,CDK11B,PELP1,ZNF707,TELO2,RGS12,EIF2S3B,PCBP2,C3ORF38,CYTH1,TBL3,EIF3A,BMS1,RPS3A,ZGPAT,RAB8A,KIF5B,CFL2,HBE1,SCAPER,CEP192,IGIP,SLC25A5,RBM15,ZNF33A,SSB,ZNF444,ASB1,DDX54,HYPK,NCK1,SLK,ATAD2B,STK19,HD…
TF	Factor: FLI-1; motif: CMGGAWGTSAN	TF:M01208	0.025714719246396286	1.5898182129492096	6290	255	103	19917	LSM8,SUPT4H1,DMAC1,GOLGA3,HDGFL2,KCMF1,RPS14,CCDC88B,SLC38A10,FKBP2,GTF2A2,SREK1,SCYL1,N4BP2,ZBTB37,NUMA1,NIPBL,TCEAL3,UBTF,GAK,KIAA1109,RPL23A,TIMM8B,CCDC137,MTX3,PNISR,NASP,CHD2,PEX2,FAM50A,ZNF221,CEP131,AXIN1,POLR2J3,ARFRP1,RER1,EIF3CL,CDK11B,GOLGB1,DAPK3,DAZAP1,CCDC9,TELO2,MINDY2,PCBP2,INTS1,C3ORF38,CCDC12,ARHGAP4,PSENEN,UBN2,PAXX,RPS3A,ZGPAT,WDR46,TIMM13,HNRNPLL,CFAP410,SSR3,CEP192,SRPRB,ZNF…
TF	Factor: FKLF; motif: BGGGNGGVMD	TF:M01837	0.02571780910523249	1.5897660316278923	5489	255	92	19917	LSM8,MAGED4,SELENOT,BCKDHA,DMAC1,INO80D,GOLGA3,KCMF1,POTEE,CCDC88B,KIAA0232,SLC38A10,N4BP2,CEP250,LYPLA1,ANKRD36C,NUMA1,ZNF652,ZNF37A,NIPBL,ANKRD12,KRI1,UBTF,MVD,RSF1,LUC7L,GCC2,PPIA,TTC3,PTRHD1,TTBK2,NASP,FAM50A,MBD3,NFKBIL1,CNOT7,EDF1,RRBP1,PURA,AXIN1,POLR2J3,SAMD8,HTATSF1,ARFRP1,MOB1B,DAPK3,DAZAP1,TELO2,MINDY2,INTS1,TBL3,PSENEN,PAXX,ZGPAT,WDR46,CASP8AP2,SDHAF4,RAB8A,BDP1,HNRNPLL,CFAP410,SMG6,C…
TF	Factor: Elk-1:Pax-1; motif: ACCGGAACTACGCWTSANTG	TF:M08224	0.02579067710482044	1.5885372558059552	9010	255	139	19917	RPL41,LSM8,APOC2,MAGED4,SELENOT,DMAC1,GOLGA4,SAFB2,CNIH1,GOLGA3,ALMS1,HDGFL2,SAFB,RPS14,CCDC88B,KIAA0232,SLC38A10,ZNF207,SREK1,SCYL1,ZBTB37,LYPLA1,ATP5MG,NDUFS7,SNRPG,ZNF652,RBM6,RANBP2,TCEAL3,ANKRD12,KRI1,KIF7,KIF3A,MMADHC,RSF1,FKBP1A,GAK,KIAA1109,GCC2,OLA1,CTNNBL1,PPIA,RPL23A,TIMM8B,CCDC137,COMMD4,NDUFC2,MTX3,PNISR,PTRHD1,TTBK2,PEX2,ZNF221,SREK1IP1,PPP2CA,SURF6,EDF1,RRBP1,PURA,RPL15,AXIN1,SAMD8…
TF	Factor: Sp2; motif: NTAAGYCCCGCCCMCTN	TF:M12156	0.02636827614428802	1.5789182617687596	4355	255	76	19917	SAFB2,SMG1,HDGFL2,SAFB,POTEE,CCDC88B,KIAA0232,FKBP2,ZNF627,ZNF207,SCYL1,CEP250,ANKRD36C,NUMA1,UPF1,ZNF652,NONO,KRI1,RSF1,OLA1,POLD1,COMMD4,YWHAQ,MTX3,NASP,MBD3,RNF139,CEP131,RRBP1,RPL15,AXIN1,SAMD8,RER1,PELP1,GOLGB1,DAPK3,CCDC9,TELO2,EIF2S3B,INTS1,CCDC12,ARHGAP4,EIF3A,PAXX,RESF1,WDR46,CASP8AP2,SDHAF4,TBCD,ATRAID,AKAP13,CANX,EWSR1,RBM15,DHX38,GRINA,SSB,ZNF444,CMC4,ENGASE,HDAC4,PAF1,LNPEP,THRAP3,FL…
TF	Factor: STAT5B; motif: NTTCTKRGAAN	TF:M09662	0.026489364720734557	1.5769284570137458	68	255	5	19917	BCKDHA,NASP,FAM71D,RPS3A,IGIP
TF	Factor: E2F-1; motif: TWSGCGCGAAAAYKR; match class: 1	TF:M00024_1	0.026769474752826622	1.5723601500751863	2721	255	52	19917	LSM8,INO80D,SMG1,RPS14,SLC38A10,ZNF627,ATP5MG,NUMA1,COX7C,NONO,CSNK2A3,RSF1,POLD1,NASP,SREK1IP1,NFKBIL1,PURA,CDK11B,FAM71D,PCBP2,RPS3A,TBCD,BDP1,SMG6,SUGP2,RNF2,SNRNP70,ZNF646,ATRAID,IGIP,EWSR1,RBM15,PRAME,ZNF444,CMC4,NACA2,IFT140,SLK,LNPEP,SMAD4,SEC22A,RBM12B,SLX1A,MAGEF1,RSRC2,ZSWIM9,CCHCR1,ARL5A,NSMCE2,FAM184A,CREBZF,RPA3
TF	Factor: Kaiso; motif: TCTCGCGAG; match class: 1	TF:M04691_1	0.027257857217844867	1.5645082877178833	10595	255	159	19917	RPL41,LSM8,SUPT4H1,SELENOT,BCKDHA,DMAC1,GOLGA4,SAFB2,SAFB,KCMF1,RPS14,FKBP2,GTF2A2,ZNF627,ZNF638,N4BP2,CEP250,LYPLA1,ANKRD36C,ATP5MG,NUMA1,NDUFS7,SNRPG,COX7C,ZNF652,ZNF37A,NONO,NIPBL,TCEAL3,ANKRD12,KIF7,KIF3A,CSNK2A3,MVD,RSF1,CNIH4,GAK,CRTAP,LUC7L,GCC2,OLA1,PPIA,RPL23A,TIMM8B,COMMD4,NDUFC2,YWHAQ,PNISR,TTBK2,METTL16,NASP,PEX2,ZNF221,CNOT7,RAN,EDF1,RRBP1,PURA,RPL15,UBXN7,POLR2J3,HTATSF1,ARFRP1,MOB1…
TF	Factor: ATF-3; motif: GGTSACGTGAN	TF:M09868	0.028162815960339628	1.5503239228646593	6456	255	105	19917	RPL41,UQCRHL,LSM8,APOC2,SUPT4H1,SAFB,ZNF627,SREK1,SCYL1,ZBTB37,ANKRD36C,NUMA1,UPF1,RBM6,TCEAL3,ANKRD12,CSNK2A3,MVD,GAK,KIAA1109,RIF1,TCEAL4,RPL23A,POLD1,COMMD4,NDUFC2,YWHAQ,PNISR,TTC3,PEX2,FAM50A,ZNF221,RNF139,PPP2CA,ANKS3,RRBP1,PURA,GRIPAP1,POLR2J3,ARFRP1,MOB1B,EIF3CL,CDK11B,PELP1,GOLGB1,DAPK3,MACF1,RGS12,MINDY2,INTS1,TBL3,PSENEN,EIF3A,UBN2,BMS1,TAF10,RPS3A,ZGPAT,TIMM13,RAB8A,BDP1,HELZ,SUGP2,CFL…
TF	Factor: Sp3; motif: NGCCACGCCCMCN	TF:M12153	0.028405630077971204	1.5465955729999532	6237	255	102	19917	INO80D,GOLGA3,SMG1,HDGFL2,KCMF1,POTEE,CCDC88B,KIAA0232,FKBP2,ZNF627,SCYL1,CEP250,LYPLA1,ANKRD36C,NUMA1,ZNF652,NONO,NIPBL,ANKRD12,KIF7,RSF1,FKBP1A,CNIH4,GAK,GCC2,POLD1,COMMD4,MTX3,PTRHD1,METTL16,NASP,MBD3,CEP131,PPP2CA,CNOT7,RAN,RRBP1,AXIN1,GRIPAP1,SAMD8,HTATSF1,ARFRP1,RER1,PELP1,DAPK3,CCDC9,TELO2,MINDY2,INTS1,C3ORF38,ARHGAP4,PSENEN,PAXX,RPS3A,ZGPAT,WDR46,CASP8AP2,SDHAF4,RAB8A,TBCD,HNRNPLL,HELZ,SU…
TF	Factor: ZF5; motif: NGAGCGCGC	TF:M10111	0.028753473926838587	1.541309677370398	2665	255	51	19917	GOLGA4,INO80D,KIAA0232,SREK1,N4BP2,ZBTB37,ANKRD36C,NUMA1,UPF1,NONO,NIPBL,RANBP2,KIF7,MVD,RIF1,YWHAQ,PTRHD1,CHD2,SURF6,RRBP1,PURA,UBXN7,HTATSF1,ARFRP1,CDK11B,DAPK3,DAZAP1,CCDC9,ARHGEF18,ZGPAT,TBCD,KIF5B,SMG6,DNAJC5,CFL2,ZNF646,SLC25A5,EWSR1,PRAME,HYPK,IFT140,SLK,PTPN11,TSR3,SMAD4,FCHSD2,USP34,ANTKMT,PPP1R26,RAI1,KCNS3
TF	Factor: C/EBPgamma; motif: NNTTGCGYMANN	TF:M11324	0.030419251696459152	1.516851473652376	3005	255	56	19917	BCKDHA,SAFB2,HDGFL2,FKBP2,ZNF638,LYPLA1,NDUFS7,ZNF37A,KRI1,FKBP1A,GCC2,METTL16,NASP,CHD2,RNF139,CEP131,NFKBIL1,ANKS3,CNOT7,RRBP1,RPL15,GRIPAP1,PELP1,CCDC9,RPL10A,MINDY2,INTS1,ARHGEF18,TBL3,RPS3A,WDR46,SDHAF4,BDP1,SUGP2,SSR3,SRPRB,RNF2,ZNF444,NXF1,IFT140,BTG1,HDAC4,THRAP3,DAZ1,PPT1,DMAP1,TULP4,TBCA,MAGEF1,RSRC2,ARL5A,NSMCE2,CAPZA1,CCZ1B,MORC2,RPA3
TF	Factor: P73; motif: GNNNRRRCNTGCMNNTSASN	TF:M03558	0.030650592702330136	1.5135611229445032	4734	255	81	19917	MAGED4,INO80D,SAFB2,GOLGA3,ALMS1,SMG1,HDGFL2,SAFB,KIAA0232,ZNF627,SCYL1,N4BP2,LYPLA1,ZNF652,RBM6,NONO,NIPBL,KRI1,KIF7,KIF3A,UBTF,FKBP1A,CNIH4,RIF1,PPIA,POLD1,COMMD4,NDUFC2,YWHAQ,TTBK2,METTL16,FAM50A,MBD3,RNF139,CEP131,CNOT7,EDF1,AXIN1,UBXN7,POLR2J3,EIF3CL,GOLGB1,DAPK3,DAZAP1,RPL10A,EIF3A,PAXX,RESF1,RPS3A,TIMM13,SDHAF4,BDP1,UBE2D2,CFAP410,KIF5B,SMG6,HELZ,SUGP2,DNAJC5,CFL2,SCAPER,ATP5F1E,CANX,ASB1,…
TF	Factor: Sp1; motif: NWRGCCACGCCCMCN; match class: 1	TF:M12152_1	0.0309194241998805	1.5097686023715333	2874	255	54	19917	MAGED4,GOLGA3,POTEE,CCDC88B,KIAA0232,SLC38A10,FKBP2,SCYL1,LYPLA1,NUMA1,ANKRD12,MVD,GAK,CRTAP,POLD1,COMMD4,MTX3,NASP,MBD3,CEP131,PPP2CA,RAN,AXIN1,SAMD8,RER1,PELP1,ZNF707,CCDC9,TELO2,PSENEN,PAXX,WDR46,CASP8AP2,RAB8A,TBCD,SNRNP70,ATRAID,ATP5F1E,CANX,GRINA,ASB1,CMC4,ENGASE,NXF1,IFT140,FLYWCH2,ARHGAP45,FAM199X,ANTKMT,ZSWIM9,CCHCR1,PPP1R26,MORC2,TMOD2
TF	Factor: E2F-2; motif: NTTTTGGCGCCAWWWN; match class: 1	TF:M11528_1	0.03128091811692831	1.5047205085768922	4809	255	82	19917	LSM8,SELENOT,ALMS1,HDGFL2,POTEE,FKBP2,GTF2A2,ZNF638,ZNF207,SREK1,CEP250,LYPLA1,ATP5MG,NDUFS7,UPF1,KRI1,UBTF,GAK,CRTAP,TCEAL4,RPL23A,COMMD4,PNISR,NASP,MBD3,CEP131,PPP2CA,CNOT7,PSMC5,POLR2J3,ARFRP1,MOB1B,EIF3CL,CDK11B,PELP1,DAZAP1,MINDY2,TBL3,UBN2,RPS3A,ZGPAT,CASP8AP2,SDHAF4,RAB8A,TBCD,KIF5B,SUGP2,SCAPER,SSR3,CEP192,SRPRB,SNRNP70,ZNF646,ATRAID,ATP5F1E,UBXN1,EWSR1,DHX38,ZNF33A,GLB1,PRAME,ZNF444,ASB1…
TF	Factor: E2F-2; motif: NTTTTGGCGCCAWWWN	TF:M11528	0.03129278374316205	1.5045558011708664	10466	255	157	19917	RPL41,LSM8,SELENOT,BCKDHA,GOLGA4,INO80D,ALMS1,SMG1,HDGFL2,POTEE,CCDC88B,SLC38A10,FKBP2,GTF2A2,ZNF627,ZNF638,ZNF207,SREK1,SCYL1,N4BP2,ZBTB37,CEP250,LYPLA1,ATP5MG,NUMA1,NDUFS7,COX7C,UPF1,RBM6,ZNF37A,NIPBL,RANBP2,KRI1,KIF7,KIF3A,UBTF,MVD,RSF1,GAK,KIAA1109,CRTAP,LUC7L,GCC2,OLA1,TCEAL4,PPIA,RPL23A,TIMM8B,CCDC137,COMMD4,NDUFC2,YWHAQ,PNISR,PTRHD1,TTBK2,NASP,PEX2,FAM50A,MBD3,SREK1IP1,CEP131,PPP2CA,CNOT7,…
TF	Factor: Six-2; motif: NCGTATCRYN; match class: 1	TF:M11033_1	0.03140126244726349	1.5030528913261878	2415	255	47	19917	RPL41,LSM8,ZNF627,ZNF638,ZBTB37,ATP5MG,KRI1,MMADHC,RSF1,POLD1,TIMM8B,CCDC137,YWHAQ,PTRHD1,TTBK2,PPP2CA,RAN,EDF1,RRBP1,PURA,GRIPAP1,MOB1B,RER1,MINDY2,WDR46,BDP1,UBE2D2,SMG6,CFL2,SSR3,CANX,ZNF33A,ZNF444,CMC4,ZBTB17,IFT140,SLK,ZNF721,PAF1,LNPEP,ANKRD23,FLYWCH2,FCHSD2,RBM12B,SLX1A,CKLF,RPA3
TF	Factor: YY1; motif: CAARATGGCGGC	TF:M10104	0.0315932572271402	1.5004055965434353	6112	255	100	19917	RPL41,UQCRHL,SUPT4H1,BCKDHA,GOLGA4,SAFB2,SAFB,ZNF627,ZNF638,ZNF207,SREK1,CEP250,ATP5MG,NUMA1,NDUFS7,COX7C,NONO,RANBP2,ANKRD12,KRI1,CSNK2A3,MMADHC,RSF1,CNIH4,RIF1,PPIA,RPL23A,CCDC137,COMMD4,MTX3,PNISR,TTC3,PTRHD1,METTL16,NASP,CHD2,SREK1IP1,RNF139,PPP2CA,RAN,PSMC5,RPL15,GRIPAP1,UBXN7,HTATSF1,RER1,EIF3CL,CDK11B,PELP1,TELO2,EIF2S3B,FAM71D,PCBP2,ARHGAP4,TBL3,PSENEN,EIF3A,UBN2,WDR46,CASP8AP2,RAB8A,BDP1…
TF	Factor: E2F1; motif: NNNNNGCGSSAAAN; match class: 1	TF:M08874_1	0.03181468002252806	1.4973724403406665	2158	255	43	19917	RPL41,HDGFL2,SCYL1,N4BP2,UPF1,ZNF37A,RANBP2,KIF7,RIF1,PPIA,METTL16,NASP,MBD3,EDF1,PURA,POLR2J3,CDK11B,PELP1,DAZAP1,TELO2,ARHGEF18,RPS3A,SDHAF4,RAB8A,TBCD,HNRNPLL,SMG6,CFL2,SNRNP70,ATRAID,EWSR1,RBM15,ZNF444,SMAD4,FCHSD2,USP34,CKLF,RSRC2,ZSWIM9,CCHCR1,MRFAP1,CREBZF,RPA3
TF	Factor: AP-2; motif: MKCCCSCNGGCG; match class: 1	TF:M00189_1	0.031819903991711244	1.4973011350581653	6114	255	100	19917	GOLGA4,INO80D,GOLGA3,SMG1,HDGFL2,KCMF1,KIAA0232,FKBP2,SREK1,SCYL1,N4BP2,CEP250,LYPLA1,ANKRD36C,UPF1,ZNF652,ZNF37A,NIPBL,ANKRD12,KIF7,KIF3A,UBTF,MVD,FKBP1A,CNIH4,RIF1,CRTAP,LUC7L,GCC2,OLA1,PPIA,POLD1,YWHAQ,PTRHD1,PEX2,FAM50A,MBD3,RNF139,PPP2CA,CNOT7,RRBP1,PURA,AXIN1,UBXN7,POLR2J3,SAMD8,ARFRP1,RER1,CDK11B,DAZAP1,CCDC9,RPL10A,TELO2,MINDY2,INTS1,C3ORF38,TBL3,PSENEN,EIF3A,TAF10,ZGPAT,TBCD,UBE2D2,HNRNP…
TF	Factor: elf5; motif: NNNNMGGAAGTN	TF:M11387	0.03198817248552135	1.4950105708607218	2615	255	50	19917	RPL41,SUPT4H1,BCKDHA,DMAC1,GOLGA3,RPS14,CCDC88B,SLC38A10,GTF2A2,ATP5MG,NUMA1,SNRPG,ZNF37A,NONO,NIPBL,KIF3A,GAK,KIAA1109,GCC2,TIMM8B,CCDC137,PNISR,NASP,PEX2,ELOC,CEP131,RRBP1,PSMC5,RPL15,CCDC9,TELO2,ARHGAP4,UBN2,BMS1,WDR46,KIF5B,SSR3,ZNF646,UBXN1,SLC25A5,CMC4,PTPN11,BTG1,ARHGAP45,DPP8,ZSWIM9,KCNS3,CAPZA1,CCZ1B,CREBZF
TF	Factor: XBP-1; motif: WNNGMCACGTC; match class: 1	TF:M01770_1	0.03235436238754802	1.4900671544663462	4604	255	79	19917	DMAC1,ALMS1,SMG1,SAFB,POTEE,RPS14,KIAA0232,SCYL1,N4BP2,ZBTB37,CEP250,ZNF652,RANBP2,ANKRD12,KRI1,UBTF,RIF1,GCC2,PPIA,POLD1,COMMD4,YWHAQ,PTRHD1,SURF6,RAN,EDF1,RRBP1,PURA,SAMD8,HTATSF1,ARFRP1,ZNF707,MACF1,DAZAP1,CCDC9,TELO2,MINDY2,INTS1,CYTH1,TBL3,EIF3A,UBN2,BMS1,ZGPAT,DNAJC5,CFL2,SSR3,TLR1,RNF2,SNRNP70,AKAP13,UBXN1,EWSR1,GRINA,ZNF33A,ZNF444,DDX54,HYPK,PTPN11,STK19,BTG1,TMEM241,FUNDC2,ARHGAP45,DAZ1,…
TF	Factor: LHX4; motif: NNCRTTAN; match class: 1	TF:M11005_1	0.03250535882569528	1.4880450354340904	4253	255	74	19917	LSM8,HDGFL2,SAFB,KCMF1,POTEE,RPS14,GTF2A2,ZNF638,ZBTB37,CEP250,NDUFS7,SNRPG,RBM6,NIPBL,MMADHC,MVD,RIF1,CRTAP,LUC7L,TCEAL4,PPIA,POLD1,NDUFC2,PNISR,PTRHD1,TTBK2,NASP,CHD2,ELOC,CEP131,NFKBIL1,SURF6,GRIPAP1,UBXN7,RER1,CDK11B,GOLGB1,FAM71D,PCBP2,ARHGEF18,EIF3A,TAF10,RESF1,TIMM13,RAB8A,CFAP410,SMG6,SSR3,SNRNP70,CANX,SLC25A5,EWSR1,RBM15,GLB1,ZNF444,ASB1,DOHH,NACA2,NCK1,PTPN11,ZNF721,PAF1,CLK1,FLYWCH2,DA…
TF	Factor: TAFII250; motif: RARRWGGCGGMGGNGR; match class: 1	TF:M10086_1	0.03264830572853212	1.48613935135189	4184	255	73	19917	MAGED4,GOLGA4,ALMS1,SMG1,KCMF1,ZNF638,ZBTB37,ZNF652,NIPBL,TCEAL3,ANKRD12,CSNK2A3,UBTF,MVD,RIF1,TCEAL4,YWHAQ,PTRHD1,TTBK2,FAM50A,MBD3,RNF139,PPP2CA,CNOT7,RAN,RRBP1,PURA,AXIN1,UBXN7,POLR2J3,ARFRP1,MOB1B,RER1,DAPK3,DAZAP1,TELO2,MINDY2,EIF3A,UBN2,TAF10,ZGPAT,TBCD,BDP1,HNRNPLL,CFAP410,SMG6,DNAJC5,SLC25A5,RBM15,SSB,ZNF444,PPAN,CMC4,ZBTB17,SLK,STK19,BTG1,TMEM241,THRAP3,CYTH2,CLK1,FLYWCH2,JMJD1C,FCHSD2,U…
TF	Factor: ERR3; motif: NNSAAGGTCAN; match class: 1	TF:M11841_1	0.0331278303793422	1.4798070061685704	21	255	3	19917	SAFB2,SAFB,DAZAP1
TF	Factor: Egr-1; motif: GCGGGGGCGG	TF:M07354	0.03349764991508975	1.4749856605664284	7842	255	123	19917	SUPT4H1,MAGED4,DMAC1,INO80D,SAFB2,ALMS1,HDGFL2,SAFB,KCMF1,POTEE,RPS14,KIAA0232,SLC38A10,FKBP2,GTF2A2,ZNF638,SCYL1,N4BP2,ZBTB37,CEP250,NUMA1,COX7C,UPF1,ZNF652,NIPBL,ANKRD12,UBTF,RSF1,FKBP1A,RIF1,GCC2,CTNNBL1,PPIA,POLD1,CCDC137,COMMD4,NDUFC2,YWHAQ,MTX3,METTL16,PEX2,FAM50A,MBD3,ELOC,RNF139,NFKBIL1,PPP2CA,CNOT7,EDF1,RRBP1,PURA,AXIN1,GRIPAP1,UBXN7,POLR2J3,SAMD8,ARFRP1,MOB1B,RER1,PELP1,DAZAP1,CCDC9,MIN…
TF	Factor: USF1; motif: NNCACGTGACN	TF:M11094	0.033564585692427776	1.474118709200137	1974	255	40	19917	UQCRHL,DMAC1,POTEE,KIAA0232,SREK1,SCYL1,TCEAL3,ANKRD12,KRI1,UBTF,OLA1,TCEAL4,TIMM8B,COMMD4,SURF6,RAN,CCDC9,TELO2,RGS12,MINDY2,EIF3A,TIMM13,SUGP2,CFL2,SSR3,ATP5F1E,UBXN1,CANX,EWSR1,RBM15,DDX54,DOHH,HDAC4,TMEM241,TSR3,THRAP3,FUNDC2,ARHGAP45,TULP4,MORC2
TF	Factor: E2F-1; motif: TTTSGCGS; match class: 1	TF:M00431_1	0.033980761445517406	1.4687668936282043	2297	255	45	19917	SELENOT,HDGFL2,N4BP2,CEP250,ATP5MG,UPF1,RANBP2,KIF7,LUC7L,COMMD4,NASP,PEX2,CEP131,RRBP1,RPL15,CDK11B,PELP1,DAZAP1,TELO2,TBL3,CASP8AP2,RAB8A,TBCD,HNRNPLL,SMG6,SUGP2,SCAPER,CEP192,SNRNP70,ZNF646,ATRAID,ZNF444,ASB1,PPAN,DDX54,HDAC4,LNPEP,C6ORF47,JMJD1C,ZSWIM9,RAI1,SETD2,FAM184A,CREBZF,RPA3
TF	Factor: ER71:E2A; motif: CASSTGNACCGGAWRYN	TF:M08568	0.03588906421409791	1.4450378654882112	18420	255	247	19917	RPL41,LSM8,APOC2,SUPT4H1,MAGED4,SELENOT,BCKDHA,DMAC1,GOLGA4,INO80D,SAFB2,GOLGA3,ALMS1,SMG1,HDGFL2,SAFB,KCMF1,POTEE,RPS14,CCDC88B,KIAA0232,SLC38A10,FKBP2,GTF2A2,ZNF627,ZNF638,ZNF207,SREK1,SCYL1,N4BP2,ZBTB37,CEP250,LYPLA1,ANKRD36C,ATP5MG,NUMA1,NDUFS7,SNRPG,COX7C,UPF1,ZNF652,RBM6,ZNF37A,NONO,NIPBL,RANBP2,TCEAL3,ANKRD12,KRI1,KIF7,KIF3A,CSNK2A3,MMADHC,UBTF,MVD,RSF1,FKBP1A,CNIH4,GAK,KIAA1109,RIF1,CRTAP…
TF	Factor: SP1; motif: RCCMCRCCCMC	TF:M03920	0.03597688356508218	1.4439764593647442	7329	255	116	19917	MAGED4,GOLGA4,INO80D,GOLGA3,SMG1,HDGFL2,KCMF1,CCDC88B,KIAA0232,FKBP2,ZNF627,SCYL1,CEP250,LYPLA1,ANKRD36C,NUMA1,UPF1,ZNF652,RBM6,NONO,ANKRD12,KRI1,KIF3A,MVD,RSF1,FKBP1A,RIF1,CRTAP,OLA1,TCEAL4,PPIA,POLD1,COMMD4,YWHAQ,MTX3,PTRHD1,METTL16,NASP,FAM50A,MBD3,CEP131,PPP2CA,CNOT7,SURF6,RAN,RRBP1,PSMC5,AXIN1,GRIPAP1,UBXN7,SAMD8,HTATSF1,RER1,PELP1,ZNF707,DAZAP1,CCDC9,TELO2,MINDY2,INTS1,C3ORF38,ARHGAP4,PSENE…
TF	Factor: USF1; motif: NNNNGTCACGTGGN	TF:M07067	0.03597688356508218	1.4439764593647442	3168	255	58	19917	UQCRHL,BCKDHA,DMAC1,CNIH1,SMG1,KCMF1,POTEE,KIAA0232,ZNF207,SREK1,SCYL1,ZBTB37,TCEAL3,ANKRD12,KRI1,UBTF,OLA1,TCEAL4,TIMM8B,COMMD4,SURF6,RAN,RPL15,CDK11B,DAZAP1,CCDC9,TELO2,RGS12,MINDY2,CYTH1,EIF3A,TIMM13,SUGP2,CFL2,SCAPER,SSR3,ATP5F1E,UBXN1,CANX,EWSR1,RBM15,SSB,DDX54,DOHH,PTPN11,HDAC4,TMEM241,TSR3,ANKRD23,THRAP3,FUNDC2,ARHGAP45,TULP4,SLX1A,CKLF,CCZ1B,MORC2,RPA3
TF	Factor: PRX-2; motif: NNCRTTAN	TF:M10887	0.03597688356508218	1.4439764593647442	5775	255	95	19917	LSM8,SUPT4H1,SELENOT,DMAC1,SAFB2,HDGFL2,SAFB,RPS14,GTF2A2,ZNF207,ZBTB37,CEP250,ANKRD36C,NUMA1,NDUFS7,SNRPG,ZNF652,ZNF37A,NIPBL,RANBP2,TCEAL3,KIF7,MMADHC,UBTF,GAK,KIAA1109,RIF1,LUC7L,PPIA,POLD1,TIMM8B,NDUFC2,TTC3,PTRHD1,TTBK2,METTL16,CHD2,PEX2,ELOC,CEP131,NFKBIL1,PPP2CA,SURF6,PURA,RER1,CDK11B,ZNF707,DAPK3,MACF1,FAM71D,ARHGEF18,EIF3A,UBN2,TAF10,RESF1,TIMM13,RAB8A,TBCD,CFAP410,SMG6,DNAJC5,SSR3,TLR1,…
TF	Factor: PRX-2; motif: NKCGTTAN	TF:M10885	0.03597688356508218	1.4439764593647442	5775	255	95	19917	LSM8,SUPT4H1,SELENOT,DMAC1,SAFB2,HDGFL2,SAFB,RPS14,GTF2A2,ZNF207,ZBTB37,CEP250,ANKRD36C,NUMA1,NDUFS7,SNRPG,ZNF652,ZNF37A,NIPBL,RANBP2,TCEAL3,KIF7,MMADHC,UBTF,GAK,KIAA1109,RIF1,LUC7L,PPIA,POLD1,TIMM8B,NDUFC2,TTC3,PTRHD1,TTBK2,METTL16,CHD2,PEX2,ELOC,CEP131,NFKBIL1,PPP2CA,SURF6,PURA,RER1,CDK11B,ZNF707,DAPK3,MACF1,FAM71D,ARHGEF18,EIF3A,UBN2,TAF10,RESF1,TIMM13,RAB8A,TBCD,CFAP410,SMG6,DNAJC5,SSR3,TLR1,…
TF	Factor: E2F-1:DP-2; motif: TTTSSCGC; match class: 1	TF:M00737_1	0.03640894655298743	1.4387918866481257	2968	255	55	19917	RPL41,SUPT4H1,KCMF1,FKBP2,N4BP2,CEP250,NUMA1,COX7C,NONO,NIPBL,RANBP2,UBTF,GCC2,PPIA,TIMM8B,PTRHD1,NASP,MBD3,SREK1IP1,PSMC5,POLR2J3,SAMD8,HTATSF1,RER1,CDK11B,PELP1,DAZAP1,CCDC9,MINDY2,UBN2,RESF1,TIMM13,CASP8AP2,TBCD,HNRNPLL,KIF5B,SUGP2,CFL2,SNRNP70,ATRAID,ATP5F1E,EWSR1,ZNF33A,PRAME,ZNF444,ASB1,ENGASE,LUC7L3,BTG1,HDAC4,FCHSD2,RBM12B,MRFAP1,CREBZF,RPA3
TF	Factor: E2F-4; motif: AATGGCGCCAAA; match class: 1	TF:M04518_1	0.03645137030059259	1.4382861407945706	1065	255	25	19917	RPL41,POTEE,SREK1,ZNF652,RPL23A,PNISR,NASP,PPP2CA,PSMC5,MOB1B,CDK11B,PELP1,MACF1,MINDY2,RPS3A,CASP8AP2,CFAP410,SUGP2,SCAPER,ATRAID,ASB1,PPAN,PAF1,DAZ1,CCHCR1
TF	Factor: E2F; motif: TTTSGCGSG	TF:M00918	0.03668592502032222	1.4355005258966407	5634	255	93	19917	RPL41,MAGED4,BCKDHA,DMAC1,GOLGA4,SMG1,HDGFL2,POTEE,RPS14,SLC38A10,ZNF638,N4BP2,CEP250,LYPLA1,ATP5MG,NUMA1,NDUFS7,COX7C,UPF1,NIPBL,RANBP2,KIF7,GAK,KIAA1109,CRTAP,RPL23A,TIMM8B,COMMD4,YWHAQ,PNISR,PTRHD1,TTBK2,NASP,PEX2,CEP131,PPP2CA,CNOT7,SURF6,RAN,PURA,PSMC5,HTATSF1,ARFRP1,MOB1B,CDK11B,PELP1,DAPK3,DAZAP1,MINDY2,C3ORF38,TBL3,EIF3A,UBN2,ZGPAT,CASP8AP2,SDHAF4,RAB8A,TBCD,HNRNPLL,HELZ,SCAPER,SSR3,CEP19…
TF	Factor: HIF2A; motif: ACGTGNNN	TF:M07356	0.03804959302855466	1.4196499840024286	1863	255	38	19917	LSM8,BCKDHA,DMAC1,SMG1,POTEE,RPS14,SCYL1,NDUFS7,TCEAL3,OLA1,CTNNBL1,RPL23A,PNISR,PEX2,CEP131,RAN,AXIN1,ZNF707,DAZAP1,MINDY2,EIF3A,DNAJC5,CFL2,SSR3,RNF2,OSER1,ZNF646,EWSR1,ZNF33A,ASB1,DOHH,TSR3,CLK1,ARHGAP45,FCHSD2,ANTKMT,DPP8,MRFAP1
TF	Factor: GCMa:Erg; motif: ATGCGGGCGGAARKG	TF:M08487	0.03830303819819371	1.4167667764131329	14054	255	200	19917	RPL41,UQCRHL,LSM8,SUPT4H1,MAGED4,SELENOT,BCKDHA,DMAC1,GOLGA4,INO80D,SAFB2,GOLGA3,ALMS1,SMG1,HDGFL2,SAFB,KCMF1,POTEE,CCDC88B,KIAA0232,SLC38A10,FKBP2,GTF2A2,ZNF207,SREK1,SCYL1,ZBTB37,CEP250,LYPLA1,ANKRD36C,ATP5MG,NUMA1,SNRPG,COX7C,ZNF652,RBM6,ZNF37A,NONO,NIPBL,RANBP2,TCEAL3,ANKRD12,KRI1,KIF7,KIF3A,UBTF,MVD,RSF1,FKBP1A,KIAA1109,RIF1,LUC7L,GCC2,OLA1,TCEAL4,PPIA,POLD1,TIMM8B,CCDC137,COMMD4,NDUFC2,YWHA…
TF	Factor: Hey1; motif: NGCRCGYGYN; match class: 1	TF:M11058_1	0.03944125595134072	1.40404926401348	11001	255	163	19917	RPL41,UQCRHL,LSM8,BCKDHA,DMAC1,SAFB2,CNIH1,GOLGA3,ALMS1,SMG1,HDGFL2,SAFB,KCMF1,POTEE,KIAA0232,ZNF627,ZNF638,ZNF207,SREK1,SCYL1,N4BP2,ZBTB37,CEP250,LYPLA1,ANKRD36C,NUMA1,NDUFS7,UPF1,ZNF652,RBM6,ZNF37A,NONO,RANBP2,TCEAL3,ANKRD12,KRI1,KIF7,KIF3A,MMADHC,UBTF,MVD,FKBP1A,GAK,RIF1,CRTAP,OLA1,TCEAL4,PPIA,RPL23A,POLD1,TIMM8B,CCDC137,COMMD4,NDUFC2,MTX3,PNISR,METTL16,NASP,PEX2,MBD3,CEP131,PPP2CA,ANKS3,SURF6…
TF	Factor: AhR,; motif: NRCGTGNGN; match class: 1	TF:M00976_1	0.03947106253879229	1.4037211824840592	1014	255	24	19917	SAFB2,SAFB,POTEE,LYPLA1,UPF1,ANKRD12,FKBP1A,RIF1,PPIA,MBD3,SURF6,RAN,DAZAP1,TIMM13,RAB8A,HELZ,SCAPER,SNRNP70,ATAD2B,HDAC4,FUNDC2,USP34,MORC2,MRFAP1
TF	Factor: E2F-3; motif: GGCGGGN; match class: 1	TF:M02089_1	0.040567447294870926	1.391822319400206	9425	255	143	19917	SUPT4H1,MAGED4,DMAC1,GOLGA4,INO80D,GOLGA3,ALMS1,SMG1,HDGFL2,KCMF1,POTEE,CCDC88B,KIAA0232,SLC38A10,FKBP2,GTF2A2,ZNF627,SCYL1,N4BP2,ZBTB37,CEP250,ANKRD36C,NUMA1,ZNF652,RBM6,NONO,NIPBL,RANBP2,ANKRD12,KRI1,KIF7,KIF3A,UBTF,MVD,RSF1,KIAA1109,RIF1,CRTAP,OLA1,PPIA,POLD1,COMMD4,YWHAQ,MTX3,TTBK2,NASP,FAM50A,MBD3,RNF139,CEP131,PPP2CA,CNOT7,RAN,EDF1,RRBP1,PURA,AXIN1,GRIPAP1,UBXN7,SAMD8,HTATSF1,ARFRP1,MOB1B,R…
TF	Factor: Gbx2; motif: NTCRTTAN	TF:M10575	0.04106011983624721	1.3865797874509371	2258	255	44	19917	LSM8,SUPT4H1,SELENOT,DMAC1,RPS14,CEP250,NUMA1,SNRPG,ZNF652,NIPBL,RANBP2,TCEAL3,UBTF,LUC7L,PPIA,NDUFC2,TTC3,PTRHD1,TTBK2,METTL16,CHD2,ELOC,CEP131,NFKBIL1,PPP2CA,RER1,ARHGEF18,TAF10,RAB8A,CFAP410,SSR3,EWSR1,GLB1,DOHH,PTPN11,FLYWCH2,ARHGAP45,RBM12B,TBCA,RSRC2,ARL5A,NSMCE2,CAPZA1,CREBZF
TF	Factor: ZNF460; motif: NNACNCCCCCCNN	TF:M12313	0.04148285619973403	1.3821313489782887	5877	255	96	19917	APOC2,SUPT4H1,MAGED4,DMAC1,GOLGA4,INO80D,GOLGA3,SMG1,HDGFL2,POTEE,KIAA0232,FKBP2,GTF2A2,ZNF627,N4BP2,ZBTB37,CEP250,LYPLA1,NUMA1,UPF1,ZNF652,ZNF37A,ANKRD12,KIF7,UBTF,RSF1,RIF1,GCC2,YWHAQ,TTBK2,MBD3,ELOC,NFKBIL1,CNOT7,EDF1,RRBP1,PSMC5,AXIN1,GRIPAP1,UBXN7,POLR2J3,HTATSF1,ARFRP1,RER1,DAPK3,DAZAP1,CCDC9,RPL10A,TELO2,MINDY2,PCBP2,CCDC12,ARHGEF18,ZGPAT,WDR46,TIMM13,CASP8AP2,TBCD,UBE2D2,HNRNPLL,SMG6,HELZ…
TF	Factor: ETV6; motif: NSCGGAAGTR; match class: 1	TF:M03985_1	0.04210218103235332	1.37569540568972	111	255	6	19917	NIPBL,CCDC137,C3ORF38,ZNF646,DMAP1,SLX1A
TF	Factor: CREB,; motif: NTGACGTNA	TF:M00981	0.043992602446039565	1.3566203459448547	8437	255	130	19917	RPL41,LSM8,APOC2,SUPT4H1,SELENOT,BCKDHA,DMAC1,GOLGA3,POTEE,FKBP2,ZNF627,ZNF638,ZNF207,SCYL1,ZBTB37,LYPLA1,ANKRD36C,ATP5MG,NUMA1,NDUFS7,SNRPG,UPF1,RBM6,ZNF37A,RANBP2,ANKRD12,KIF7,MMADHC,MVD,GAK,KIAA1109,RIF1,GCC2,TCEAL4,RPL23A,COMMD4,NDUFC2,YWHAQ,MTX3,PTRHD1,NASP,CHD2,PEX2,FAM50A,RNF139,PPP2CA,ANKS3,CNOT7,RAN,RRBP1,PURA,GRIPAP1,UBXN7,POLR2J3,SAMD8,HTATSF1,MOB1B,EIF3CL,CDK11B,PELP1,GOLGB1,DAPK3,MAC…
TF	Factor: EGR; motif: CGCCCCCGCNN	TF:M08878	0.0446501410510881	1.3501771648244276	7527	255	118	19917	SUPT4H1,MAGED4,DMAC1,INO80D,SAFB2,ALMS1,HDGFL2,SAFB,KCMF1,POTEE,RPS14,KIAA0232,SLC38A10,FKBP2,GTF2A2,ZNF638,SREK1,SCYL1,N4BP2,ZBTB37,CEP250,NUMA1,COX7C,UPF1,ZNF652,NIPBL,ANKRD12,UBTF,RSF1,FKBP1A,RIF1,GCC2,CTNNBL1,PPIA,POLD1,CCDC137,COMMD4,YWHAQ,MTX3,METTL16,PEX2,MBD3,ELOC,NFKBIL1,PPP2CA,CNOT7,EDF1,RRBP1,PURA,AXIN1,GRIPAP1,UBXN7,POLR2J3,SAMD8,ARFRP1,MOB1B,RER1,PELP1,DAPK3,DAZAP1,CCDC9,MINDY2,INTS1…
TF	Factor: ZNF853; motif: TGGKCCTAAANM	TF:M05664	0.04481153316887049	1.3486101970066264	7	255	2	19917	CYTH1,ASB1
TF	Factor: LIN28B; motif: CGCGATANNACNGCG	TF:M12249	0.044969778781241775	1.3470792488412708	279	255	10	19917	CEP250,NDUFS7,SNRPG,ZNF37A,RRBP1,ARFRP1,INTS1,UBN2,ZGPAT,RAI1
TF	Factor: Elf-1; motif: NANSCGGAAGTR; match class: 1	TF:M11450_1	0.04506005418300194	1.3462082903892716	1324	255	29	19917	GOLGA3,RPS14,SLC38A10,FKBP2,GTF2A2,NIPBL,GAK,RPL23A,CCDC137,PEX2,ELOC,PSMC5,AXIN1,ZNF707,C3ORF38,TBL3,PSENEN,BMS1,WDR46,ZNF646,ASB1,CMC4,ATAD2B,ZNF721,TSR3,DMAP1,SLX1A,ZSWIM9,RPA3
TF	Factor: Sp2; motif: WGGGCGG; match class: 1	TF:M05332_1	0.04534808303410905	1.3434410668244945	3343	255	60	19917	SELENOT,GOLGA3,HDGFL2,KCMF1,FKBP2,ZNF207,SCYL1,ZBTB37,ANKRD36C,NIPBL,TCEAL3,ANKRD12,UBTF,RSF1,CNIH4,KIAA1109,GCC2,PTRHD1,TTBK2,PEX2,FAM50A,MBD3,ELOC,CNOT7,ARFRP1,MOB1B,UBN2,BMS1,PAXX,TAF10,ZGPAT,TIMM13,TBCD,CFAP410,KIF5B,SMG6,RNF2,OSER1,ATRAID,AKAP13,UBXN1,GLB1,PRAME,NXF1,PTPN11,HDAC4,TSR3,LNPEP,THRAP3,CLK1,FLYWCH2,ARHGAP45,FCHSD2,FAM199X,USP34,SLX1A,CKLF,TBCA,ZSWIM9,ARL5A
TF	Factor: Sp1; motif: NWRGCCACGCCCMCN	TF:M12152	0.04534808303410905	1.3434410668244945	7381	255	116	19917	RPL41,MAGED4,INO80D,GOLGA3,SMG1,HDGFL2,KCMF1,POTEE,CCDC88B,KIAA0232,SLC38A10,FKBP2,GTF2A2,ZNF627,SCYL1,CEP250,LYPLA1,ANKRD36C,NUMA1,ZNF652,NONO,NIPBL,ANKRD12,KIF7,KIF3A,MVD,RSF1,FKBP1A,CNIH4,GAK,RIF1,CRTAP,OLA1,PPIA,POLD1,COMMD4,MTX3,METTL16,NASP,FAM50A,MBD3,RNF139,CEP131,NFKBIL1,PPP2CA,CNOT7,RAN,RRBP1,AXIN1,UBXN7,SAMD8,ARFRP1,RER1,EIF3CL,PELP1,ZNF707,DAPK3,DAZAP1,CCDC9,TELO2,MINDY2,EIF2S3B,INTS1…
TF	Factor: Sp6; motif: WGGGCGG; match class: 1	TF:M05361_1	0.04534808303410905	1.3434410668244945	3343	255	60	19917	SELENOT,GOLGA3,HDGFL2,KCMF1,FKBP2,ZNF207,SCYL1,ZBTB37,ANKRD36C,NIPBL,TCEAL3,ANKRD12,UBTF,RSF1,CNIH4,KIAA1109,GCC2,PTRHD1,TTBK2,PEX2,FAM50A,MBD3,ELOC,CNOT7,ARFRP1,MOB1B,UBN2,BMS1,PAXX,TAF10,ZGPAT,TIMM13,TBCD,CFAP410,KIF5B,SMG6,RNF2,OSER1,ATRAID,AKAP13,UBXN1,GLB1,PRAME,NXF1,PTPN11,HDAC4,TSR3,LNPEP,THRAP3,CLK1,FLYWCH2,ARHGAP45,FCHSD2,FAM199X,USP34,SLX1A,CKLF,TBCA,ZSWIM9,ARL5A
TF	Factor: CPBP; motif: NGGGCGG; match class: 1	TF:M05444_1	0.04534808303410905	1.3434410668244945	3343	255	60	19917	SELENOT,GOLGA3,HDGFL2,KCMF1,FKBP2,ZNF207,SCYL1,ZBTB37,ANKRD36C,NIPBL,TCEAL3,ANKRD12,UBTF,RSF1,CNIH4,KIAA1109,GCC2,PTRHD1,TTBK2,PEX2,FAM50A,MBD3,ELOC,CNOT7,ARFRP1,MOB1B,UBN2,BMS1,PAXX,TAF10,ZGPAT,TIMM13,TBCD,CFAP410,KIF5B,SMG6,RNF2,OSER1,ATRAID,AKAP13,UBXN1,GLB1,PRAME,NXF1,PTPN11,HDAC4,TSR3,LNPEP,THRAP3,CLK1,FLYWCH2,ARHGAP45,FCHSD2,FAM199X,USP34,SLX1A,CKLF,TBCA,ZSWIM9,ARL5A
TF	Factor: C/EBPgamma; motif: NNTTGCGYAANN; match class: 1	TF:M11325_1	0.04698598496442345	1.3280316646236725	328	255	11	19917	HDGFL2,NDUFS7,CHD2,RRBP1,GRIPAP1,CCDC9,BDP1,SUGP2,HDAC4,DMAP1,MAGEF1
TF	Factor: c-Ets-1(p54); motif: NCMGGAWGYN	TF:M00032	0.047286220381318224	1.325265398040764	7921	255	123	19917	LSM8,SUPT4H1,GOLGA3,HDGFL2,KCMF1,RPS14,CCDC88B,SLC38A10,FKBP2,GTF2A2,ZNF207,SREK1,N4BP2,ZBTB37,LYPLA1,ANKRD36C,NUMA1,SNRPG,COX7C,UPF1,NIPBL,KRI1,RSF1,FKBP1A,GAK,KIAA1109,RIF1,RPL23A,TIMM8B,CCDC137,MTX3,PNISR,NASP,CHD2,PEX2,ZNF221,CEP131,NFKBIL1,SURF6,RAN,EDF1,PURA,AXIN1,POLR2J3,ARFRP1,RER1,EIF3CL,CDK11B,ZNF707,GOLGB1,DAPK3,DAZAP1,CCDC9,TELO2,MINDY2,PCBP2,INTS1,C3ORF38,CCDC12,ARHGAP4,PSENEN,EIF3A,…
TF	Factor: SAP-1; motif: NTCGTAAATGCN; match class: 1	TF:M11438_1	0.047286220381318224	1.325265398040764	1209	255	27	19917	LSM8,CNIH1,KCMF1,SREK1,SNRPG,COX7C,ANKRD12,MVD,PPIA,MTX3,PEX2,HTATSF1,TELO2,C3ORF38,RESF1,SDHAF4,DNAJC5,SCAPER,SRPRB,RNF2,NACA2,SLK,FCHSD2,RBM12B,CKLF,RSRC2,TMOD2
TF	Factor: CREB,; motif: NTGACGTNA; match class: 1	TF:M00981_1	0.04739296342635568	1.3242861345275312	2943	255	54	19917	RPL41,APOC2,BCKDHA,POTEE,SCYL1,ZBTB37,NUMA1,NDUFS7,UPF1,RANBP2,ANKRD12,MVD,GAK,KIAA1109,YWHAQ,MTX3,FAM50A,RNF139,PPP2CA,CNOT7,RRBP1,HTATSF1,MOB1B,EIF3CL,CDK11B,PELP1,GOLGB1,CCDC9,EIF2S3B,INTS1,TBL3,EIF3A,UBN2,TAF10,RPS3A,BDP1,UBE2D2,CFAP410,SSR3,OSER1,DDX54,NCK1,ATAD2B,ZNF721,STK19,BTG1,PAF1,THRAP3,FUNDC2,CLK1,ARHGAP45,ARL5A,FAM184A,CREBZF
TF	Factor: Fli-1; motif: NACCGGAWWTCCGGTY	TF:M11399	0.04740858088514638	1.3241430445328533	13090	255	188	19917	UQCRHL,MAGED4,DMAC1,GOLGA4,INO80D,GOLGA3,ALMS1,SMG1,HDGFL2,SAFB,KCMF1,POTEE,KIAA0232,SLC38A10,FKBP2,GTF2A2,ZNF627,ZNF207,SREK1,N4BP2,ZBTB37,CEP250,LYPLA1,ANKRD36C,ATP5MG,NUMA1,NDUFS7,SNRPG,COX7C,UPF1,ZNF652,RBM6,NONO,NIPBL,RANBP2,TCEAL3,ANKRD12,KIF7,KIF3A,UBTF,MVD,RSF1,FKBP1A,CNIH4,GAK,KIAA1109,CRTAP,OLA1,CTNNBL1,PPIA,RPL23A,POLD1,TIMM8B,NDUFC2,YWHAQ,MTX3,PNISR,METTL16,NASP,PEX2,MBD3,ELOC,SREK1IP…
TF	Factor: Sp2; motif: NYSGCCCCGCCCCCY; match class: 1	TF:M03567_1	0.04761747804163452	1.322233609804839	3627	255	64	19917	INO80D,SMG1,KCMF1,KIAA0232,SLC38A10,FKBP2,SCYL1,CEP250,ANKRD12,KIF7,KIF3A,UBTF,MVD,RSF1,RIF1,CRTAP,PPIA,POLD1,COMMD4,YWHAQ,NASP,FAM50A,MBD3,CEP131,CNOT7,RAN,EDF1,RRBP1,AXIN1,SAMD8,RER1,DAPK3,CCDC9,TELO2,ARHGAP4,PAXX,WDR46,CASP8AP2,TBCD,CFAP410,SMG6,HELZ,DNAJC5,CFL2,ZNF646,ATRAID,AKAP13,RBM15,GRINA,CMC4,ENGASE,NXF1,IFT140,HDAC4,THRAP3,CYTH2,FLYWCH2,ARHGAP45,FCHSD2,FAM199X,ANTKMT,ZSWIM9,PPP1R26,KCN…
TF	Factor: GABP-alpha; motif: CACTTCCGG; match class: 1	TF:M04698_1	0.04781096766870577	1.3204724663245757	583	255	16	19917	GOLGA3,RPS14,SLC38A10,FKBP2,GTF2A2,NIPBL,CCDC137,ELOC,C3ORF38,PSENEN,WDR46,ZNF646,DMAP1,SLX1A,ZSWIM9,RPA3
TF	Factor: N-Myc; motif: GSSCACGYGS; match class: 1	TF:M03834_1	0.0480001161001362	1.3187577121746727	153	255	7	19917	BCKDHA,SAFB2,SAFB,UPF1,MBD3,CEP192,SNRNP70
TF	Factor: Tel-2; motif: YTACTTCCTG	TF:M00678	0.04823703080513456	1.3166194327218066	5329	255	88	19917	SUPT4H1,GOLGA3,HDGFL2,RPS14,CCDC88B,SLC38A10,FKBP2,GTF2A2,ZBTB37,ANKRD36C,NUMA1,SNRPG,ZNF37A,NIPBL,GAK,RPL23A,TIMM8B,CCDC137,MTX3,PNISR,TTC3,NASP,CHD2,PEX2,ZNF221,CEP131,NFKBIL1,EDF1,PSMC5,AXIN1,POLR2J3,ARFRP1,RER1,EIF3CL,CDK11B,GOLGB1,DAPK3,DAZAP1,CCDC9,MINDY2,PCBP2,INTS1,C3ORF38,CCDC12,ARHGAP4,PSENEN,PAXX,TAF10,RPS3A,ZGPAT,WDR46,TIMM13,RAB8A,UBE2D2,DNAJC5,SSR3,TLR1,CEP192,SRPRB,OSER1,SNRNP70,ZN…
TF	Factor: Pax-5; motif: NGTCACGCWTSANTGMNY; match class: 1	TF:M04064_1	0.048849633372248825	1.311138691413105	3563	255	63	19917	LSM8,SELENOT,SAFB2,GOLGA3,ALMS1,SAFB,FKBP2,ZNF627,SCYL1,NUMA1,SNRPG,ZNF652,NONO,NIPBL,ANKRD12,KIF7,UBTF,MVD,CNIH4,RIF1,OLA1,PPIA,RPL23A,POLD1,NDUFC2,TTC3,NASP,FAM50A,CEP131,PPP2CA,SURF6,RAN,PURA,RGS12,TBL3,EIF3A,PAXX,TBCD,BDP1,HNRNPLL,SSR3,AKAP13,IGIP,ATP5F1E,UBXN1,CANX,EWSR1,RBM15,ZNF33A,ZNF444,PPAN,RNASE10,ENGASE,PTPN11,ZNF721,HDAC4,PAF1,TSR3,CLK1,FCHSD2,TBCA,ANTKMT,RPA3
TF	Factor: TFE3; motif: NNCACGTGAY	TF:M04193	0.049088258434125634	1.3090223756382846	2285	255	44	19917	UQCRHL,CNIH1,SMG1,ZNF207,SREK1,SCYL1,ZBTB37,CEP250,TCEAL3,ANKRD12,TCEAL4,COMMD4,MTX3,PNISR,ANKS3,MACF1,DAZAP1,CCDC9,RGS12,EIF3A,TIMM13,TBCD,SUGP2,CFL2,SCAPER,SSR3,SNRNP70,ATP5F1E,UBXN1,CANX,RBM15,DDX54,DOHH,SLK,PTPN11,HDAC4,TSR3,ANKRD23,THRAP3,ARHGAP45,SLX1A,CKLF,MORC2,RPA3
TF	Factor: ZNF501; motif: NNGCGACGCGAACAN	TF:M12086	0.04965230913547413	1.3040605493544042	1835	255	37	19917	RPL41,SUPT4H1,SLC38A10,GTF2A2,ZNF627,ZNF207,UPF1,ANKRD12,KRI1,UBTF,MVD,GAK,LUC7L,YWHAQ,RNF139,SURF6,EIF3CL,CDK11B,INTS1,RPS3A,CFAP410,HELZ,CEP192,OSER1,AKAP13,CANX,ZNF33A,IFT140,SLK,TSR3,ARHGAP45,FCHSD2,TBCA,ANTKMT,SETD2,CCZ1B,MRFAP1
TF	Factor: CREB1; motif: RTGACGYGTCAN	TF:M11221	0.04965230913547413	1.3040605493544042	9789	255	147	19917	RPL41,UQCRHL,APOC2,MAGED4,DMAC1,GOLGA4,INO80D,SAFB2,CNIH1,ALMS1,SMG1,SAFB,POTEE,RPS14,FKBP2,SREK1,N4BP2,ZBTB37,CEP250,LYPLA1,ANKRD36C,NUMA1,NDUFS7,COX7C,ZNF37A,NONO,TCEAL3,ANKRD12,KIF7,CSNK2A3,MVD,FKBP1A,GAK,KIAA1109,RIF1,OLA1,TCEAL4,CTNNBL1,PPIA,RPL23A,POLD1,TIMM8B,CCDC137,COMMD4,YWHAQ,PNISR,TTC3,PTRHD1,PEX2,ELOC,ZNF221,SREK1IP1,RNF139,NFKBIL1,PPP2CA,ANKS3,CNOT7,SURF6,RAN,EDF1,RRBP1,PURA,PSMC5,A…
TF	Factor: TR4; motif: ACCCCGS; match class: 1	TF:M04934_1	0.04972690434251487	1.303408576134962	15594	255	217	19917	UQCRHL,LSM8,APOC2,SUPT4H1,MAGED4,SELENOT,BCKDHA,DMAC1,GOLGA4,INO80D,SAFB2,GOLGA3,ALMS1,SMG1,HDGFL2,SAFB,KCMF1,POTEE,RPS14,CCDC88B,KIAA0232,SLC38A10,FKBP2,ZNF627,ZNF638,SREK1,SCYL1,N4BP2,ZBTB37,CEP250,LYPLA1,ANKRD36C,ATP5MG,NUMA1,NDUFS7,COX7C,ZNF37A,NONO,RANBP2,TCEAL3,ANKRD12,KRI1,KIF7,KIF3A,CSNK2A3,UBTF,MVD,RSF1,CNIH4,GAK,KIAA1109,RIF1,LUC7L,GCC2,OLA1,TCEAL4,CTNNBL1,PPIA,POLD1,TIMM8B,CCDC137,COMM…
TF	Factor: HOXB2:Elk-1; motif: TAATKRCCGGAAGTN	TF:M08341	0.049744290815166875	1.3032567563202417	6213	255	100	19917	APOC2,SUPT4H1,MAGED4,INO80D,CNIH1,GOLGA3,ALMS1,HDGFL2,RPS14,CCDC88B,KIAA0232,SLC38A10,GTF2A2,ZBTB37,SNRPG,COX7C,NIPBL,ANKRD12,KIF3A,MMADHC,GAK,KIAA1109,GCC2,OLA1,CTNNBL1,RPL23A,TIMM8B,MTX3,PNISR,TTC3,NASP,PEX2,MBD3,ZNF221,RNF139,CEP131,UBXN7,RER1,EIF3CL,ZNF707,DAPK3,CCDC9,RPL10A,TELO2,MINDY2,PCBP2,INTS1,C3ORF38,PSENEN,EIF3A,BMS1,RPS3A,WDR46,TIMM13,HNRNPLL,KIF5B,CFL2,SSR3,SRPRB,OSER1,SNRNP70,ZNF64…
TF	Factor: E47; motif: NNNMRCAGGTGTTMNN; match class: 1	TF:M00071_1	0.04980332274742425	1.3027416812818136	50	255	4	19917	GOLGA4,POTEE,FAM71D,HYPK
TF	Factor: isx; motif: NTCRTTAA	TF:M10956	0.0499204515566931	1.301721494886267	9557	255	144	19917	LSM8,SUPT4H1,SELENOT,BCKDHA,DMAC1,GOLGA4,SAFB2,CNIH1,ALMS1,HDGFL2,SAFB,KCMF1,POTEE,RPS14,GTF2A2,ZNF627,ZNF638,ZNF207,ZBTB37,CEP250,ANKRD36C,NUMA1,NDUFS7,SNRPG,ZNF652,RBM6,ZNF37A,NIPBL,RANBP2,TCEAL3,KRI1,KIF7,CSNK2A3,MMADHC,UBTF,MVD,RSF1,GAK,KIAA1109,RIF1,CRTAP,LUC7L,TCEAL4,CTNNBL1,PPIA,POLD1,TIMM8B,NDUFC2,MTX3,PNISR,TTC3,PTRHD1,TTBK2,METTL16,CHD2,PEX2,FAM50A,MBD3,ELOC,CEP131,NFKBIL1,PPP2CA,ANKS3,…
HPA	pancreas; exocrine glandular cells[≥Low]	HPA:0350471	6.395206363798253e-16	15.19414543692218	6841	174	159	10877	RPL41,UQCRHL,SELENOT,BCKDHA,DMAC1,GOLGA4,INO80D,SAFB2,CNIH1,GOLGA3,SMG1,HDGFL2,SAFB,KCMF1,RPS14,CCDC88B,KIAA0232,SLC38A10,FKBP2,ZNF638,ZNF207,SREK1,N4BP2,ZBTB37,LYPLA1,ATP5MG,NUMA1,SNRPG,COX7C,UPF1,RBM6,ZNF37A,NONO,NIPBL,RANBP2,ANKRD12,KRI1,KIF7,KIF3A,MMADHC,UBTF,RSF1,CNIH4,GAK,KIAA1109,RIF1,CRTAP,LUC7L,GCC2,OLA1,CTNNBL1,RPL23A,POLD1,TIMM8B,NDUFC2,YWHAQ,MTX3,PNISR,PTRHD1,TTBK2,NASP,CHD2,PEX2,FAM5…
HPA	epididymis	HPA:0180000	6.395206363798253e-16	15.19414543692218	7232	174	163	10877	RPL41,UQCRHL,SELENOT,BCKDHA,DMAC1,GOLGA4,INO80D,SAFB2,CNIH1,GOLGA3,ALMS1,SMG1,HDGFL2,SAFB,KCMF1,RPS14,CCDC88B,KIAA0232,SLC38A10,FKBP2,ZNF638,ZNF207,SREK1,N4BP2,ZBTB37,LYPLA1,ATP5MG,NUMA1,SNRPG,COX7C,UPF1,RBM6,ZNF37A,NONO,NIPBL,RANBP2,ANKRD12,KRI1,KIF7,KIF3A,MMADHC,UBTF,RSF1,CNIH4,GAK,KIAA1109,RIF1,CRTAP,LUC7L,GCC2,OLA1,CTNNBL1,RPL23A,POLD1,TIMM8B,YWHAQ,MTX3,PNISR,PTRHD1,TTBK2,NASP,CHD2,PEX2,FAM50…
HPA	epididymis; glandular cells[≥Low]	HPA:0180051	6.395206363798253e-16	15.19414543692218	7232	174	163	10877	RPL41,UQCRHL,SELENOT,BCKDHA,DMAC1,GOLGA4,INO80D,SAFB2,CNIH1,GOLGA3,ALMS1,SMG1,HDGFL2,SAFB,KCMF1,RPS14,CCDC88B,KIAA0232,SLC38A10,FKBP2,ZNF638,ZNF207,SREK1,N4BP2,ZBTB37,LYPLA1,ATP5MG,NUMA1,SNRPG,COX7C,UPF1,RBM6,ZNF37A,NONO,NIPBL,RANBP2,ANKRD12,KRI1,KIF7,KIF3A,MMADHC,UBTF,RSF1,CNIH4,GAK,KIAA1109,RIF1,CRTAP,LUC7L,GCC2,OLA1,CTNNBL1,RPL23A,POLD1,TIMM8B,YWHAQ,MTX3,PNISR,PTRHD1,TTBK2,NASP,CHD2,PEX2,FAM50…
HPA	gallbladder; glandular cells[≥Low]	HPA:0220051	4.085283800167488e-15	14.388777768124104	7560	174	165	10877	RPL41,UQCRHL,SELENOT,BCKDHA,DMAC1,GOLGA4,INO80D,SAFB2,CNIH1,GOLGA3,ALMS1,SMG1,HDGFL2,SAFB,KCMF1,RPS14,CCDC88B,KIAA0232,SLC38A10,FKBP2,ZNF638,ZNF207,SREK1,N4BP2,ZBTB37,LYPLA1,ATP5MG,NUMA1,SNRPG,COX7C,UPF1,RBM6,ZNF37A,NONO,NIPBL,RANBP2,ANKRD12,KRI1,KIF7,KIF3A,MMADHC,UBTF,RSF1,CNIH4,GAK,KIAA1109,RIF1,CRTAP,LUC7L,GCC2,OLA1,CTNNBL1,RPL23A,POLD1,TIMM8B,NDUFC2,YWHAQ,MTX3,PNISR,PTRHD1,TTBK2,NASP,CHD2,PEX…
HPA	gallbladder	HPA:0220000	4.085283800167488e-15	14.388777768124104	7560	174	165	10877	RPL41,UQCRHL,SELENOT,BCKDHA,DMAC1,GOLGA4,INO80D,SAFB2,CNIH1,GOLGA3,ALMS1,SMG1,HDGFL2,SAFB,KCMF1,RPS14,CCDC88B,KIAA0232,SLC38A10,FKBP2,ZNF638,ZNF207,SREK1,N4BP2,ZBTB37,LYPLA1,ATP5MG,NUMA1,SNRPG,COX7C,UPF1,RBM6,ZNF37A,NONO,NIPBL,RANBP2,ANKRD12,KRI1,KIF7,KIF3A,MMADHC,UBTF,RSF1,CNIH4,GAK,KIAA1109,RIF1,CRTAP,LUC7L,GCC2,OLA1,CTNNBL1,RPL23A,POLD1,TIMM8B,NDUFC2,YWHAQ,MTX3,PNISR,PTRHD1,TTBK2,NASP,CHD2,PEX…
HPA	nasopharynx	HPA:0320000	6.387753926193919e-15	14.194651822426248	7093	174	160	10877	RPL41,UQCRHL,SELENOT,BCKDHA,DMAC1,GOLGA4,INO80D,SAFB2,CNIH1,GOLGA3,ALMS1,SMG1,HDGFL2,SAFB,KCMF1,RPS14,CCDC88B,KIAA0232,SLC38A10,ZNF638,ZNF207,SREK1,N4BP2,ZBTB37,LYPLA1,ATP5MG,NUMA1,SNRPG,COX7C,UPF1,RBM6,ZNF37A,NONO,NIPBL,RANBP2,ANKRD12,KRI1,KIF7,KIF3A,MMADHC,UBTF,RSF1,CNIH4,GAK,KIAA1109,CRTAP,LUC7L,GCC2,OLA1,CTNNBL1,RPL23A,POLD1,TIMM8B,YWHAQ,MTX3,PNISR,PTRHD1,TTBK2,NASP,CHD2,PEX2,FAM50A,MBD3,SREK…
HPA	pancreas	HPA:0350000	6.8151483336041846e-15	14.166524687185916	7305	174	162	10877	RPL41,UQCRHL,SELENOT,BCKDHA,DMAC1,GOLGA4,INO80D,SAFB2,CNIH1,GOLGA3,ALMS1,SMG1,HDGFL2,SAFB,KCMF1,RPS14,CCDC88B,KIAA0232,SLC38A10,FKBP2,ZNF638,ZNF207,SREK1,N4BP2,ZBTB37,LYPLA1,ATP5MG,NUMA1,SNRPG,COX7C,UPF1,RBM6,ZNF37A,NONO,NIPBL,RANBP2,ANKRD12,KRI1,KIF7,KIF3A,MMADHC,UBTF,RSF1,CNIH4,GAK,KIAA1109,RIF1,CRTAP,LUC7L,GCC2,OLA1,CTNNBL1,RPL23A,POLD1,TIMM8B,NDUFC2,YWHAQ,MTX3,PNISR,PTRHD1,TTBK2,NASP,CHD2,PEX…
HPA	stomach 2; glandular cells[≥Low]	HPA:0550051	6.8151483336041846e-15	14.166524687185916	7512	174	164	10877	RPL41,UQCRHL,SELENOT,BCKDHA,DMAC1,GOLGA4,INO80D,SAFB2,CNIH1,GOLGA3,ALMS1,SMG1,HDGFL2,SAFB,KCMF1,RPS14,CCDC88B,KIAA0232,SLC38A10,FKBP2,ZNF638,ZNF207,SREK1,N4BP2,ZBTB37,LYPLA1,ATP5MG,NUMA1,SNRPG,COX7C,UPF1,RBM6,ZNF37A,NONO,NIPBL,RANBP2,ANKRD12,KRI1,KIF7,KIF3A,MMADHC,UBTF,RSF1,CNIH4,GAK,KIAA1109,RIF1,CRTAP,LUC7L,GCC2,OLA1,CTNNBL1,RPL23A,POLD1,TIMM8B,NDUFC2,YWHAQ,MTX3,PNISR,PTRHD1,TTBK2,NASP,CHD2,PEX…
HPA	stomach 2	HPA:0550000	6.8151483336041846e-15	14.166524687185916	7512	174	164	10877	RPL41,UQCRHL,SELENOT,BCKDHA,DMAC1,GOLGA4,INO80D,SAFB2,CNIH1,GOLGA3,ALMS1,SMG1,HDGFL2,SAFB,KCMF1,RPS14,CCDC88B,KIAA0232,SLC38A10,FKBP2,ZNF638,ZNF207,SREK1,N4BP2,ZBTB37,LYPLA1,ATP5MG,NUMA1,SNRPG,COX7C,UPF1,RBM6,ZNF37A,NONO,NIPBL,RANBP2,ANKRD12,KRI1,KIF7,KIF3A,MMADHC,UBTF,RSF1,CNIH4,GAK,KIAA1109,RIF1,CRTAP,LUC7L,GCC2,OLA1,CTNNBL1,RPL23A,POLD1,TIMM8B,NDUFC2,YWHAQ,MTX3,PNISR,PTRHD1,TTBK2,NASP,CHD2,PEX…
HPA	stomach 1	HPA:0540000	1.219286742368025e-14	13.913894148373464	7553	174	164	10877	RPL41,UQCRHL,BCKDHA,DMAC1,GOLGA4,INO80D,SAFB2,CNIH1,GOLGA3,ALMS1,SMG1,HDGFL2,SAFB,KCMF1,RPS14,CCDC88B,KIAA0232,SLC38A10,FKBP2,ZNF638,ZNF207,SREK1,N4BP2,ZBTB37,LYPLA1,ATP5MG,NUMA1,SNRPG,COX7C,UPF1,RBM6,ZNF37A,NONO,NIPBL,RANBP2,ANKRD12,KRI1,KIF7,KIF3A,MMADHC,UBTF,RSF1,CNIH4,GAK,KIAA1109,RIF1,CRTAP,LUC7L,GCC2,OLA1,CTNNBL1,RPL23A,POLD1,TIMM8B,NDUFC2,YWHAQ,MTX3,PNISR,PTRHD1,TTBK2,NASP,CHD2,PEX2,FAM50A…
HPA	stomach 1; glandular cells[≥Low]	HPA:0540051	1.219286742368025e-14	13.913894148373464	7553	174	164	10877	RPL41,UQCRHL,BCKDHA,DMAC1,GOLGA4,INO80D,SAFB2,CNIH1,GOLGA3,ALMS1,SMG1,HDGFL2,SAFB,KCMF1,RPS14,CCDC88B,KIAA0232,SLC38A10,FKBP2,ZNF638,ZNF207,SREK1,N4BP2,ZBTB37,LYPLA1,ATP5MG,NUMA1,SNRPG,COX7C,UPF1,RBM6,ZNF37A,NONO,NIPBL,RANBP2,ANKRD12,KRI1,KIF7,KIF3A,MMADHC,UBTF,RSF1,CNIH4,GAK,KIAA1109,RIF1,CRTAP,LUC7L,GCC2,OLA1,CTNNBL1,RPL23A,POLD1,TIMM8B,NDUFC2,YWHAQ,MTX3,PNISR,PTRHD1,TTBK2,NASP,CHD2,PEX2,FAM50A…
HPA	fallopian tube	HPA:0210000	1.2921970320289356e-14	13.888671260800058	7359	174	162	10877	RPL41,UQCRHL,SELENOT,BCKDHA,DMAC1,GOLGA4,INO80D,SAFB2,CNIH1,GOLGA3,ALMS1,SMG1,HDGFL2,SAFB,KCMF1,RPS14,CCDC88B,KIAA0232,SLC38A10,ZNF638,ZNF207,SREK1,ZBTB37,LYPLA1,ATP5MG,NUMA1,SNRPG,COX7C,UPF1,RBM6,ZNF37A,NONO,NIPBL,RANBP2,ANKRD12,KRI1,KIF7,KIF3A,MMADHC,UBTF,RSF1,CNIH4,GAK,KIAA1109,RIF1,CRTAP,LUC7L,GCC2,OLA1,CTNNBL1,RPL23A,POLD1,TIMM8B,NDUFC2,YWHAQ,MTX3,PNISR,PTRHD1,TTBK2,NASP,CHD2,PEX2,FAM50A,MBD…
HPA	esophagus; squamous epithelial cells[≥Medium]	HPA:0190222	1.4713140022425887e-14	13.832294631902991	4989	174	132	10877	RPL41,UQCRHL,SELENOT,BCKDHA,DMAC1,GOLGA4,INO80D,SAFB2,CNIH1,GOLGA3,HDGFL2,SAFB,KCMF1,RPS14,KIAA0232,SLC38A10,ZNF638,ZNF207,SREK1,N4BP2,ZBTB37,ATP5MG,NUMA1,SNRPG,COX7C,UPF1,RBM6,ZNF37A,NONO,NIPBL,RANBP2,ANKRD12,KRI1,KIF7,MMADHC,UBTF,RSF1,CNIH4,GAK,RIF1,CRTAP,LUC7L,GCC2,OLA1,CTNNBL1,RPL23A,POLD1,TIMM8B,NDUFC2,PNISR,NASP,PEX2,FAM50A,SREK1IP1,PPP2CA,SURF6,EDF1,RRBP1,PSMC5,AXIN1,UBXN7,HTATSF1,ARFRP1,M…
HPA	placenta	HPA:0380000	1.8087376055918813e-14	13.742624431873733	7385	174	162	10877	RPL41,UQCRHL,SELENOT,BCKDHA,DMAC1,GOLGA4,INO80D,SAFB2,CNIH1,GOLGA3,ALMS1,SMG1,HDGFL2,SAFB,KCMF1,RPS14,CCDC88B,KIAA0232,SLC38A10,FKBP2,ZNF638,ZNF207,SREK1,N4BP2,ZBTB37,LYPLA1,ATP5MG,NUMA1,SNRPG,COX7C,UPF1,RBM6,ZNF37A,NONO,NIPBL,RANBP2,ANKRD12,KRI1,KIF7,MMADHC,UBTF,RSF1,CNIH4,GAK,KIAA1109,RIF1,CRTAP,LUC7L,GCC2,OLA1,CTNNBL1,RPL23A,POLD1,TIMM8B,NDUFC2,YWHAQ,MTX3,PNISR,PTRHD1,TTBK2,NASP,CHD2,PEX2,FAM5…
HPA	esophagus; squamous epithelial cells[≥Low]	HPA:0190221	1.958243283413609e-14	13.708133354371164	6583	174	153	10877	RPL41,UQCRHL,SELENOT,BCKDHA,DMAC1,GOLGA4,INO80D,SAFB2,CNIH1,GOLGA3,SMG1,HDGFL2,SAFB,KCMF1,RPS14,KIAA0232,SLC38A10,ZNF638,ZNF207,SREK1,N4BP2,ZBTB37,ATP5MG,NUMA1,SNRPG,COX7C,UPF1,RBM6,ZNF37A,NONO,NIPBL,RANBP2,ANKRD12,KRI1,KIF7,MMADHC,UBTF,RSF1,CNIH4,GAK,RIF1,CRTAP,LUC7L,GCC2,OLA1,CTNNBL1,RPL23A,POLD1,TIMM8B,NDUFC2,YWHAQ,PNISR,PTRHD1,TTBK2,NASP,CHD2,PEX2,FAM50A,MBD3,SREK1IP1,PPP2CA,SURF6,EDF1,RRBP1,…
HPA	esophagus	HPA:0190000	1.958243283413609e-14	13.708133354371164	6583	174	153	10877	RPL41,UQCRHL,SELENOT,BCKDHA,DMAC1,GOLGA4,INO80D,SAFB2,CNIH1,GOLGA3,SMG1,HDGFL2,SAFB,KCMF1,RPS14,KIAA0232,SLC38A10,ZNF638,ZNF207,SREK1,N4BP2,ZBTB37,ATP5MG,NUMA1,SNRPG,COX7C,UPF1,RBM6,ZNF37A,NONO,NIPBL,RANBP2,ANKRD12,KRI1,KIF7,MMADHC,UBTF,RSF1,CNIH4,GAK,RIF1,CRTAP,LUC7L,GCC2,OLA1,CTNNBL1,RPL23A,POLD1,TIMM8B,NDUFC2,YWHAQ,PNISR,PTRHD1,TTBK2,NASP,CHD2,PEX2,FAM50A,MBD3,SREK1IP1,PPP2CA,SURF6,EDF1,RRBP1,…
HPA	adrenal gland; glandular cells[≥Low]	HPA:0020051	2.3917114804760172e-14	13.621291211805154	7313	174	161	10877	RPL41,UQCRHL,SELENOT,BCKDHA,DMAC1,GOLGA4,INO80D,SAFB2,CNIH1,GOLGA3,SMG1,HDGFL2,SAFB,KCMF1,RPS14,CCDC88B,KIAA0232,SLC38A10,FKBP2,ZNF638,ZNF207,SREK1,N4BP2,ZBTB37,LYPLA1,ATP5MG,NUMA1,SNRPG,COX7C,UPF1,RBM6,ZNF37A,NONO,NIPBL,RANBP2,ANKRD12,KRI1,KIF7,KIF3A,MMADHC,UBTF,RSF1,CNIH4,GAK,RIF1,CRTAP,LUC7L,GCC2,OLA1,CTNNBL1,RPL23A,POLD1,TIMM8B,NDUFC2,YWHAQ,MTX3,PNISR,PTRHD1,TTBK2,NASP,CHD2,PEX2,FAM50A,MBD3,R…
HPA	skeletal muscle	HPA:0440000	2.394674011159139e-14	13.620753599072248	5816	174	143	10877	UQCRHL,SELENOT,BCKDHA,DMAC1,GOLGA4,INO80D,SAFB2,CNIH1,GOLGA3,SMG1,HDGFL2,SAFB,RPS14,KIAA0232,SLC38A10,ZNF638,ZNF207,SREK1,N4BP2,ZBTB37,ATP5MG,NUMA1,SNRPG,COX7C,UPF1,RBM6,ZNF37A,NONO,NIPBL,RANBP2,ANKRD12,KRI1,KIF7,MMADHC,UBTF,RSF1,GAK,RIF1,CRTAP,LUC7L,GCC2,OLA1,CTNNBL1,RPL23A,POLD1,TIMM8B,NDUFC2,MTX3,PNISR,PTRHD1,TTBK2,NASP,PEX2,FAM50A,MBD3,SREK1IP1,RNF139,PPP2CA,SURF6,RRBP1,PSMC5,AXIN1,UBXN7,HTAT…
HPA	skeletal muscle; myocytes[≥Low]	HPA:0440341	2.394674011159139e-14	13.620753599072248	5816	174	143	10877	UQCRHL,SELENOT,BCKDHA,DMAC1,GOLGA4,INO80D,SAFB2,CNIH1,GOLGA3,SMG1,HDGFL2,SAFB,RPS14,KIAA0232,SLC38A10,ZNF638,ZNF207,SREK1,N4BP2,ZBTB37,ATP5MG,NUMA1,SNRPG,COX7C,UPF1,RBM6,ZNF37A,NONO,NIPBL,RANBP2,ANKRD12,KRI1,KIF7,MMADHC,UBTF,RSF1,GAK,RIF1,CRTAP,LUC7L,GCC2,OLA1,CTNNBL1,RPL23A,POLD1,TIMM8B,NDUFC2,MTX3,PNISR,PTRHD1,TTBK2,NASP,PEX2,FAM50A,MBD3,SREK1IP1,RNF139,PPP2CA,SURF6,RRBP1,PSMC5,AXIN1,UBXN7,HTAT…
HPA	adrenal gland	HPA:0020000	2.394674011159139e-14	13.620753599072248	7319	174	161	10877	RPL41,UQCRHL,SELENOT,BCKDHA,DMAC1,GOLGA4,INO80D,SAFB2,CNIH1,GOLGA3,SMG1,HDGFL2,SAFB,KCMF1,RPS14,CCDC88B,KIAA0232,SLC38A10,FKBP2,ZNF638,ZNF207,SREK1,N4BP2,ZBTB37,LYPLA1,ATP5MG,NUMA1,SNRPG,COX7C,UPF1,RBM6,ZNF37A,NONO,NIPBL,RANBP2,ANKRD12,KRI1,KIF7,KIF3A,MMADHC,UBTF,RSF1,CNIH4,GAK,RIF1,CRTAP,LUC7L,GCC2,OLA1,CTNNBL1,RPL23A,POLD1,TIMM8B,NDUFC2,YWHAQ,MTX3,PNISR,PTRHD1,TTBK2,NASP,CHD2,PEX2,FAM50A,MBD3,R…
HPA	heart muscle; cardiomyocytes[≥Low]	HPA:0241101	4.8118876851287787e-14	13.317684518135614	6242	174	148	10877	UQCRHL,SELENOT,BCKDHA,DMAC1,GOLGA4,INO80D,SAFB2,CNIH1,GOLGA3,ALMS1,SMG1,HDGFL2,SAFB,KCMF1,RPS14,KIAA0232,SLC38A10,ZNF638,ZNF207,SREK1,N4BP2,ZBTB37,LYPLA1,ATP5MG,NUMA1,SNRPG,COX7C,UPF1,RBM6,ZNF37A,NONO,NIPBL,RANBP2,ANKRD12,KRI1,KIF7,MMADHC,UBTF,RSF1,CNIH4,GAK,KIAA1109,RIF1,CRTAP,LUC7L,GCC2,OLA1,CTNNBL1,RPL23A,POLD1,TIMM8B,NDUFC2,MTX3,PNISR,TTBK2,NASP,CHD2,FAM50A,MBD3,SREK1IP1,PPP2CA,SURF6,EDF1,RRB…
HPA	heart muscle	HPA:0240000	4.8118876851287787e-14	13.317684518135614	6242	174	148	10877	UQCRHL,SELENOT,BCKDHA,DMAC1,GOLGA4,INO80D,SAFB2,CNIH1,GOLGA3,ALMS1,SMG1,HDGFL2,SAFB,KCMF1,RPS14,KIAA0232,SLC38A10,ZNF638,ZNF207,SREK1,N4BP2,ZBTB37,LYPLA1,ATP5MG,NUMA1,SNRPG,COX7C,UPF1,RBM6,ZNF37A,NONO,NIPBL,RANBP2,ANKRD12,KRI1,KIF7,MMADHC,UBTF,RSF1,CNIH4,GAK,KIAA1109,RIF1,CRTAP,LUC7L,GCC2,OLA1,CTNNBL1,RPL23A,POLD1,TIMM8B,NDUFC2,MTX3,PNISR,TTBK2,NASP,CHD2,FAM50A,MBD3,SREK1IP1,PPP2CA,SURF6,EDF1,RRB…
HPA	colon; glandular cells[≥Low]	HPA:0130051	5.675793075866928e-14	13.245973446133394	7473	174	162	10877	RPL41,UQCRHL,SELENOT,BCKDHA,DMAC1,GOLGA4,INO80D,SAFB2,CNIH1,GOLGA3,ALMS1,SMG1,HDGFL2,SAFB,KCMF1,RPS14,CCDC88B,KIAA0232,SLC38A10,FKBP2,ZNF638,ZNF207,SREK1,N4BP2,ZBTB37,LYPLA1,NUMA1,SNRPG,COX7C,UPF1,RBM6,ZNF37A,NONO,NIPBL,RANBP2,ANKRD12,KRI1,KIF7,KIF3A,MMADHC,UBTF,RSF1,CNIH4,GAK,KIAA1109,RIF1,CRTAP,LUC7L,GCC2,OLA1,CTNNBL1,RPL23A,POLD1,TIMM8B,NDUFC2,YWHAQ,MTX3,PNISR,PTRHD1,TTBK2,NASP,CHD2,PEX2,FAM50…
HPA	cerebellum; Purkinje cells[≥Medium]	HPA:0090162	6.234680044022133e-14	13.205185829062918	4074	174	116	10877	RPL41,UQCRHL,SELENOT,BCKDHA,GOLGA4,INO80D,SAFB2,CNIH1,GOLGA3,SMG1,HDGFL2,SAFB,RPS14,KIAA0232,SLC38A10,ZNF638,ZNF207,SREK1,N4BP2,ZBTB37,ATP5MG,NUMA1,SNRPG,COX7C,UPF1,ZNF37A,NONO,NIPBL,RANBP2,ANKRD12,KRI1,KIF3A,CNIH4,GAK,LUC7L,GCC2,OLA1,CTNNBL1,POLD1,NDUFC2,YWHAQ,MTX3,PNISR,PTRHD1,CHD2,FAM50A,RNF139,PPP2CA,SURF6,EDF1,RRBP1,PSMC5,AXIN1,GRIPAP1,ARFRP1,MOB1B,RER1,EIF3CL,CDK11B,PELP1,ZNF707,GOLGB1,DAPK…
HPA	stomach 2; glandular cells[≥Medium]	HPA:0550052	6.451903041329266e-14	13.190312167775957	6189	174	147	10877	RPL41,UQCRHL,SELENOT,BCKDHA,DMAC1,GOLGA4,INO80D,SAFB2,CNIH1,GOLGA3,SMG1,HDGFL2,SAFB,KCMF1,RPS14,KIAA0232,SLC38A10,FKBP2,ZNF638,ZNF207,SREK1,N4BP2,ZBTB37,LYPLA1,ATP5MG,NUMA1,SNRPG,COX7C,UPF1,RBM6,ZNF37A,NONO,NIPBL,RANBP2,ANKRD12,KRI1,KIF7,KIF3A,MMADHC,UBTF,CNIH4,GAK,KIAA1109,RIF1,CRTAP,LUC7L,GCC2,OLA1,CTNNBL1,RPL23A,POLD1,TIMM8B,NDUFC2,MTX3,PNISR,PTRHD1,PEX2,FAM50A,MBD3,PPP2CA,SURF6,EDF1,RRBP1,PSM…
HPA	thyroid gland	HPA:0590000	6.451903041329266e-14	13.190312167775957	7022	174	157	10877	RPL41,UQCRHL,SELENOT,BCKDHA,DMAC1,GOLGA4,INO80D,SAFB2,CNIH1,GOLGA3,SMG1,HDGFL2,SAFB,KCMF1,RPS14,CCDC88B,KIAA0232,SLC38A10,FKBP2,ZNF638,ZNF207,SREK1,N4BP2,ZBTB37,LYPLA1,ATP5MG,NUMA1,SNRPG,COX7C,UPF1,RBM6,ZNF37A,NONO,NIPBL,RANBP2,ANKRD12,KRI1,KIF7,KIF3A,MMADHC,UBTF,RSF1,CNIH4,GAK,KIAA1109,RIF1,CRTAP,LUC7L,GCC2,OLA1,CTNNBL1,POLD1,TIMM8B,NDUFC2,YWHAQ,PNISR,PTRHD1,TTBK2,NASP,CHD2,PEX2,FAM50A,MBD3,RNF1…
HPA	thyroid gland; glandular cells[≥Low]	HPA:0590051	6.451903041329266e-14	13.190312167775957	7022	174	157	10877	RPL41,UQCRHL,SELENOT,BCKDHA,DMAC1,GOLGA4,INO80D,SAFB2,CNIH1,GOLGA3,SMG1,HDGFL2,SAFB,KCMF1,RPS14,CCDC88B,KIAA0232,SLC38A10,FKBP2,ZNF638,ZNF207,SREK1,N4BP2,ZBTB37,LYPLA1,ATP5MG,NUMA1,SNRPG,COX7C,UPF1,RBM6,ZNF37A,NONO,NIPBL,RANBP2,ANKRD12,KRI1,KIF7,KIF3A,MMADHC,UBTF,RSF1,CNIH4,GAK,KIAA1109,RIF1,CRTAP,LUC7L,GCC2,OLA1,CTNNBL1,POLD1,TIMM8B,NDUFC2,YWHAQ,PNISR,PTRHD1,TTBK2,NASP,CHD2,PEX2,FAM50A,MBD3,RNF1…
HPA	gallbladder; glandular cells[≥Medium]	HPA:0220052	6.451903041329266e-14	13.190312167775957	6512	174	151	10877	RPL41,UQCRHL,SELENOT,BCKDHA,DMAC1,GOLGA4,INO80D,SAFB2,CNIH1,GOLGA3,SMG1,HDGFL2,SAFB,KCMF1,RPS14,CCDC88B,KIAA0232,SLC38A10,ZNF638,ZNF207,SREK1,N4BP2,ZBTB37,LYPLA1,ATP5MG,NUMA1,SNRPG,COX7C,UPF1,RBM6,ZNF37A,NONO,NIPBL,RANBP2,ANKRD12,KRI1,KIF7,KIF3A,MMADHC,UBTF,RSF1,CNIH4,GAK,KIAA1109,RIF1,CRTAP,LUC7L,GCC2,OLA1,CTNNBL1,RPL23A,POLD1,TIMM8B,NDUFC2,MTX3,PNISR,PTRHD1,TTBK2,CHD2,PEX2,FAM50A,MBD3,PPP2CA,SU…
HPA	tonsil; germinal center cells[≥Low]	HPA:0600431	7.757783907380612e-14	13.110262321815007	5899	174	143	10877	RPL41,UQCRHL,SELENOT,BCKDHA,DMAC1,GOLGA4,INO80D,SAFB2,CNIH1,GOLGA3,SMG1,HDGFL2,SAFB,KCMF1,RPS14,CCDC88B,KIAA0232,SLC38A10,FKBP2,ZNF638,ZNF207,SREK1,N4BP2,ZBTB37,ATP5MG,NUMA1,SNRPG,COX7C,UPF1,RBM6,ZNF37A,NONO,NIPBL,RANBP2,ANKRD12,MMADHC,UBTF,RSF1,KIAA1109,RIF1,CRTAP,LUC7L,GCC2,OLA1,CTNNBL1,RPL23A,POLD1,TIMM8B,NDUFC2,YWHAQ,MTX3,PNISR,TTBK2,NASP,CHD2,PEX2,FAM50A,PPP2CA,SURF6,EDF1,RRBP1,PSMC5,AXIN1,G…
HPA	placenta; trophoblastic cells[≥Low]	HPA:0380521	8.563777984363266e-14	13.067334600300505	6450	174	150	10877	RPL41,UQCRHL,SELENOT,BCKDHA,DMAC1,GOLGA4,INO80D,SAFB2,CNIH1,SMG1,SAFB,KCMF1,RPS14,CCDC88B,KIAA0232,FKBP2,ZNF638,ZNF207,SREK1,N4BP2,ZBTB37,LYPLA1,ATP5MG,NUMA1,SNRPG,COX7C,UPF1,RBM6,ZNF37A,NONO,NIPBL,ANKRD12,KRI1,KIF7,MMADHC,UBTF,RSF1,CNIH4,GAK,KIAA1109,RIF1,CRTAP,LUC7L,GCC2,OLA1,CTNNBL1,RPL23A,POLD1,TIMM8B,NDUFC2,YWHAQ,MTX3,PNISR,PTRHD1,TTBK2,NASP,CHD2,PEX2,FAM50A,MBD3,SREK1IP1,RNF139,CEP131,PPP2C…
HPA	oral mucosa; squamous epithelial cells[≥Medium]	HPA:0330222	1.2242762837933737e-13	12.912120563410301	4303	174	119	10877	RPL41,UQCRHL,BCKDHA,GOLGA4,SAFB2,CNIH1,GOLGA3,HDGFL2,SAFB,KCMF1,RPS14,KIAA0232,SLC38A10,ZNF638,ZNF207,SREK1,ZBTB37,NUMA1,SNRPG,COX7C,UPF1,RBM6,ZNF37A,NONO,NIPBL,RANBP2,ANKRD12,KRI1,KIF7,UBTF,RSF1,RIF1,CRTAP,LUC7L,OLA1,CTNNBL1,RPL23A,POLD1,TIMM8B,PNISR,PTRHD1,NASP,CHD2,PEX2,FAM50A,SREK1IP1,PPP2CA,SURF6,EDF1,RRBP1,PSMC5,AXIN1,UBXN7,HTATSF1,ARFRP1,MOB1B,RER1,EIF3CL,CDK11B,PELP1,ZNF707,GOLGB1,DAPK3,M…
HPA	appendix; glandular cells[≥Medium]	HPA:0030052	2.538986638447468e-13	12.595339584618126	5821	174	141	10877	RPL41,UQCRHL,SELENOT,BCKDHA,DMAC1,GOLGA4,INO80D,SAFB2,CNIH1,GOLGA3,ALMS1,SMG1,HDGFL2,SAFB,KCMF1,RPS14,KIAA0232,SLC38A10,ZNF638,ZNF207,SREK1,N4BP2,ZBTB37,LYPLA1,ATP5MG,NUMA1,SNRPG,COX7C,UPF1,RBM6,ZNF37A,NONO,NIPBL,RANBP2,ANKRD12,KRI1,KIF3A,MMADHC,RSF1,CNIH4,GAK,RIF1,CRTAP,LUC7L,GCC2,OLA1,CTNNBL1,RPL23A,POLD1,TIMM8B,NDUFC2,YWHAQ,MTX3,PNISR,NASP,PEX2,FAM50A,PPP2CA,SURF6,EDF1,RRBP1,PSMC5,AXIN1,GRIPAP…
HPA	appendix; glandular cells[≥Low]	HPA:0030051	2.7089553228878596e-13	12.567198157456042	7202	174	158	10877	RPL41,UQCRHL,SELENOT,BCKDHA,DMAC1,GOLGA4,INO80D,SAFB2,CNIH1,GOLGA3,ALMS1,SMG1,HDGFL2,SAFB,KCMF1,RPS14,CCDC88B,KIAA0232,SLC38A10,ZNF638,ZNF207,SREK1,N4BP2,ZBTB37,LYPLA1,ATP5MG,NUMA1,SNRPG,COX7C,UPF1,RBM6,ZNF37A,NONO,NIPBL,RANBP2,ANKRD12,KRI1,KIF7,KIF3A,MMADHC,UBTF,RSF1,CNIH4,GAK,KIAA1109,RIF1,CRTAP,LUC7L,GCC2,OLA1,CTNNBL1,RPL23A,POLD1,TIMM8B,NDUFC2,YWHAQ,MTX3,PNISR,PTRHD1,TTBK2,NASP,CHD2,PEX2,FAM5…
HPA	placenta; trophoblastic cells[≥Medium]	HPA:0380522	3.0988363053103027e-13	12.508801364573273	5131	174	131	10877	RPL41,BCKDHA,DMAC1,GOLGA4,INO80D,SAFB2,CNIH1,SMG1,SAFB,KCMF1,RPS14,CCDC88B,KIAA0232,FKBP2,ZNF638,ZNF207,SREK1,ZBTB37,LYPLA1,NUMA1,SNRPG,COX7C,UPF1,RBM6,ZNF37A,NONO,NIPBL,ANKRD12,KRI1,KIF7,MMADHC,UBTF,RSF1,CNIH4,GAK,KIAA1109,RIF1,CRTAP,LUC7L,GCC2,OLA1,CTNNBL1,POLD1,TIMM8B,YWHAQ,PNISR,PTRHD1,NASP,CHD2,PEX2,FAM50A,MBD3,SREK1IP1,CEP131,PPP2CA,SURF6,EDF1,RRBP1,PSMC5,AXIN1,GRIPAP1,UBXN7,ARFRP1,MOB1B,RE…
HPA	lung	HPA:0300000	3.52363202358453e-13	12.453009451698975	7220	174	158	10877	RPL41,UQCRHL,SELENOT,BCKDHA,DMAC1,GOLGA4,INO80D,SAFB2,CNIH1,GOLGA3,ALMS1,HDGFL2,SAFB,KCMF1,RPS14,CCDC88B,KIAA0232,SLC38A10,FKBP2,ZNF638,ZNF207,SREK1,N4BP2,ZBTB37,LYPLA1,ATP5MG,NUMA1,SNRPG,COX7C,UPF1,RBM6,ZNF37A,NONO,NIPBL,RANBP2,ANKRD12,KRI1,KIF7,MMADHC,UBTF,RSF1,CNIH4,GAK,KIAA1109,RIF1,CRTAP,LUC7L,GCC2,OLA1,CTNNBL1,RPL23A,POLD1,TIMM8B,YWHAQ,MTX3,PNISR,PTRHD1,TTBK2,CHD2,PEX2,FAM50A,MBD3,SREK1IP1,…
HPA	seminal vesicle	HPA:0430000	5.439663762769259e-13	12.264427944141326	6729	174	152	10877	RPL41,UQCRHL,SELENOT,BCKDHA,DMAC1,GOLGA4,INO80D,SAFB2,CNIH1,GOLGA3,ALMS1,SMG1,HDGFL2,SAFB,KCMF1,RPS14,CCDC88B,KIAA0232,SLC38A10,FKBP2,ZNF638,ZNF207,SREK1,N4BP2,ZBTB37,LYPLA1,ATP5MG,NUMA1,SNRPG,COX7C,UPF1,RBM6,ZNF37A,NONO,NIPBL,RANBP2,ANKRD12,KRI1,MMADHC,UBTF,RSF1,CNIH4,GAK,KIAA1109,RIF1,CRTAP,LUC7L,GCC2,OLA1,CTNNBL1,RPL23A,POLD1,TIMM8B,NDUFC2,YWHAQ,MTX3,PNISR,PTRHD1,NASP,CHD2,PEX2,SREK1IP1,RNF139…
HPA	seminal vesicle; glandular cells[≥Low]	HPA:0430051	5.439663762769259e-13	12.264427944141326	6729	174	152	10877	RPL41,UQCRHL,SELENOT,BCKDHA,DMAC1,GOLGA4,INO80D,SAFB2,CNIH1,GOLGA3,ALMS1,SMG1,HDGFL2,SAFB,KCMF1,RPS14,CCDC88B,KIAA0232,SLC38A10,FKBP2,ZNF638,ZNF207,SREK1,N4BP2,ZBTB37,LYPLA1,ATP5MG,NUMA1,SNRPG,COX7C,UPF1,RBM6,ZNF37A,NONO,NIPBL,RANBP2,ANKRD12,KRI1,MMADHC,UBTF,RSF1,CNIH4,GAK,KIAA1109,RIF1,CRTAP,LUC7L,GCC2,OLA1,CTNNBL1,RPL23A,POLD1,TIMM8B,NDUFC2,YWHAQ,MTX3,PNISR,PTRHD1,NASP,CHD2,PEX2,SREK1IP1,RNF139…
HPA	urinary bladder; urothelial cells[≥Medium]	HPA:0610832	5.439663762769259e-13	12.264427944141326	5873	174	141	10877	RPL41,UQCRHL,BCKDHA,DMAC1,GOLGA4,INO80D,SAFB2,CNIH1,GOLGA3,SMG1,HDGFL2,SAFB,KCMF1,RPS14,CCDC88B,KIAA0232,SLC38A10,ZNF638,ZNF207,SREK1,N4BP2,ZBTB37,LYPLA1,ATP5MG,NUMA1,SNRPG,COX7C,UPF1,RBM6,ZNF37A,NONO,NIPBL,RANBP2,ANKRD12,KRI1,KIF7,MMADHC,UBTF,RSF1,CNIH4,RIF1,CRTAP,LUC7L,GCC2,OLA1,CTNNBL1,RPL23A,POLD1,TIMM8B,NDUFC2,MTX3,PNISR,PTRHD1,NASP,CHD2,PEX2,FAM50A,MBD3,PPP2CA,SURF6,EDF1,RRBP1,PSMC5,AXIN1,G…
HPA	adrenal gland; glandular cells[≥Medium]	HPA:0020052	1.0208329463889841e-12	11.991045321965354	5910	174	141	10877	RPL41,UQCRHL,BCKDHA,GOLGA4,INO80D,SAFB2,CNIH1,GOLGA3,SMG1,HDGFL2,SAFB,KCMF1,RPS14,CCDC88B,KIAA0232,SLC38A10,ZNF207,SREK1,N4BP2,ZBTB37,LYPLA1,ATP5MG,NUMA1,SNRPG,COX7C,UPF1,RBM6,ZNF37A,NONO,NIPBL,RANBP2,ANKRD12,KRI1,MMADHC,UBTF,RSF1,CNIH4,GAK,RIF1,CRTAP,LUC7L,GCC2,OLA1,CTNNBL1,RPL23A,POLD1,TIMM8B,NDUFC2,YWHAQ,MTX3,PNISR,CHD2,PEX2,FAM50A,MBD3,PPP2CA,SURF6,EDF1,RRBP1,PSMC5,AXIN1,GRIPAP1,UBXN7,HTATSF1…
HPA	pancreas; exocrine glandular cells[≥Medium]	HPA:0350472	1.1540501100111214e-12	11.937775333269684	5212	174	131	10877	RPL41,UQCRHL,SELENOT,BCKDHA,GOLGA4,INO80D,SAFB2,CNIH1,GOLGA3,SMG1,HDGFL2,SAFB,KCMF1,RPS14,CCDC88B,KIAA0232,SLC38A10,FKBP2,ZNF638,ZNF207,SREK1,N4BP2,ZBTB37,ATP5MG,NUMA1,SNRPG,COX7C,UPF1,RBM6,ZNF37A,NONO,NIPBL,RANBP2,ANKRD12,KRI1,KIF7,MMADHC,UBTF,RSF1,CNIH4,GAK,KIAA1109,RIF1,CRTAP,LUC7L,GCC2,OLA1,POLD1,NDUFC2,YWHAQ,PNISR,PTRHD1,PEX2,FAM50A,RNF139,PPP2CA,SURF6,EDF1,RRBP1,PSMC5,AXIN1,GRIPAP1,UBXN7,HT…
HPA	colon; glandular cells[≥Medium]	HPA:0130052	2.1460947178862804e-12	11.668351114360943	6333	174	146	10877	RPL41,UQCRHL,SELENOT,BCKDHA,GOLGA4,INO80D,SAFB2,CNIH1,GOLGA3,ALMS1,SMG1,HDGFL2,SAFB,KCMF1,RPS14,KIAA0232,SLC38A10,FKBP2,ZNF638,ZNF207,SREK1,N4BP2,ZBTB37,LYPLA1,NUMA1,SNRPG,COX7C,UPF1,RBM6,ZNF37A,NONO,NIPBL,RANBP2,ANKRD12,KRI1,UBTF,RSF1,CNIH4,GAK,RIF1,CRTAP,LUC7L,GCC2,OLA1,CTNNBL1,RPL23A,POLD1,TIMM8B,NDUFC2,YWHAQ,MTX3,PNISR,PTRHD1,NASP,CHD2,PEX2,FAM50A,PPP2CA,SURF6,EDF1,RRBP1,PSMC5,AXIN1,GRIPAP1,U…
HPA	epididymis; glandular cells[≥Medium]	HPA:0180052	2.3492039744858588e-12	11.629079273070092	5601	174	136	10877	SELENOT,BCKDHA,GOLGA4,INO80D,SAFB2,CNIH1,GOLGA3,HDGFL2,SAFB,KCMF1,RPS14,CCDC88B,KIAA0232,SLC38A10,FKBP2,ZNF638,ZNF207,SREK1,N4BP2,ZBTB37,ATP5MG,NUMA1,SNRPG,COX7C,UPF1,RBM6,ZNF37A,NONO,RANBP2,ANKRD12,KRI1,KIF7,MMADHC,UBTF,RSF1,CNIH4,GAK,KIAA1109,RIF1,CRTAP,LUC7L,GCC2,OLA1,CTNNBL1,POLD1,TIMM8B,YWHAQ,MTX3,PNISR,PTRHD1,TTBK2,CHD2,PEX2,FAM50A,MBD3,PPP2CA,SURF6,EDF1,RRBP1,PSMC5,AXIN1,GRIPAP1,UBXN7,HTAT…
HPA	vagina; squamous epithelial cells[≥Medium]	HPA:0620222	2.6101190170682463e-12	11.583339689107113	3993	174	111	10877	RPL41,UQCRHL,BCKDHA,GOLGA4,INO80D,SAFB2,CNIH1,GOLGA3,HDGFL2,SAFB,RPS14,KIAA0232,SLC38A10,ZNF638,ZNF207,SREK1,N4BP2,NUMA1,SNRPG,COX7C,UPF1,RBM6,ZNF37A,NONO,NIPBL,RANBP2,ANKRD12,KRI1,KIF7,UBTF,RSF1,CNIH4,RIF1,CRTAP,LUC7L,GCC2,OLA1,CTNNBL1,POLD1,TIMM8B,PNISR,PTRHD1,NASP,FAM50A,SREK1IP1,PPP2CA,SURF6,EDF1,RRBP1,PSMC5,AXIN1,UBXN7,HTATSF1,ARFRP1,MOB1B,RER1,EIF3CL,CDK11B,PELP1,ZNF707,GOLGB1,DAPK3,MACF1,D…
HPA	lymph node	HPA:0310000	2.8304614844852604e-12	11.54814275040289	6431	174	147	10877	RPL41,UQCRHL,BCKDHA,DMAC1,GOLGA4,INO80D,SAFB2,CNIH1,GOLGA3,SMG1,HDGFL2,SAFB,KCMF1,RPS14,CCDC88B,SLC38A10,FKBP2,ZNF638,ZNF207,SREK1,N4BP2,ZBTB37,ATP5MG,NUMA1,SNRPG,COX7C,UPF1,RBM6,ZNF37A,NONO,RANBP2,ANKRD12,UBTF,RSF1,CNIH4,GAK,RIF1,CRTAP,LUC7L,GCC2,OLA1,CTNNBL1,RPL23A,POLD1,TIMM8B,YWHAQ,MTX3,PNISR,PTRHD1,NASP,CHD2,PEX2,FAM50A,MBD3,SREK1IP1,PPP2CA,SURF6,EDF1,RRBP1,PSMC5,AXIN1,GRIPAP1,UBXN7,HTATSF1,…
HPA	cervix, uterine	HPA:0110000	2.8978642952492335e-12	11.537921956064418	6836	174	152	10877	RPL41,UQCRHL,BCKDHA,DMAC1,GOLGA4,INO80D,SAFB2,CNIH1,GOLGA3,ALMS1,SMG1,HDGFL2,SAFB,KCMF1,RPS14,CCDC88B,KIAA0232,SLC38A10,ZNF638,ZNF207,SREK1,N4BP2,ZBTB37,LYPLA1,ATP5MG,NUMA1,SNRPG,COX7C,UPF1,RBM6,ZNF37A,NONO,NIPBL,RANBP2,ANKRD12,KRI1,MMADHC,UBTF,RSF1,CNIH4,GAK,KIAA1109,RIF1,CRTAP,LUC7L,GCC2,OLA1,CTNNBL1,RPL23A,POLD1,TIMM8B,NDUFC2,YWHAQ,PNISR,PTRHD1,TTBK2,NASP,CHD2,PEX2,FAM50A,MBD3,SREK1IP1,PPP2CA,…
HPA	rectum; glandular cells[≥Low]	HPA:0400051	3.704883325029561e-12	11.431225464363116	7555	174	160	10877	RPL41,UQCRHL,SELENOT,BCKDHA,DMAC1,GOLGA4,INO80D,SAFB2,CNIH1,GOLGA3,ALMS1,SMG1,HDGFL2,SAFB,KCMF1,RPS14,KIAA0232,SLC38A10,FKBP2,ZNF638,ZNF207,SREK1,N4BP2,ZBTB37,LYPLA1,ATP5MG,NUMA1,SNRPG,COX7C,UPF1,RBM6,ZNF37A,NONO,NIPBL,RANBP2,ANKRD12,KRI1,KIF7,KIF3A,MMADHC,UBTF,RSF1,CNIH4,GAK,KIAA1109,RIF1,CRTAP,LUC7L,GCC2,OLA1,CTNNBL1,RPL23A,POLD1,TIMM8B,NDUFC2,YWHAQ,MTX3,PNISR,PTRHD1,TTBK2,NASP,CHD2,PEX2,FAM50A…
HPA	rectum	HPA:0400000	3.704883325029561e-12	11.431225464363116	7555	174	160	10877	RPL41,UQCRHL,SELENOT,BCKDHA,DMAC1,GOLGA4,INO80D,SAFB2,CNIH1,GOLGA3,ALMS1,SMG1,HDGFL2,SAFB,KCMF1,RPS14,KIAA0232,SLC38A10,FKBP2,ZNF638,ZNF207,SREK1,N4BP2,ZBTB37,LYPLA1,ATP5MG,NUMA1,SNRPG,COX7C,UPF1,RBM6,ZNF37A,NONO,NIPBL,RANBP2,ANKRD12,KRI1,KIF7,KIF3A,MMADHC,UBTF,RSF1,CNIH4,GAK,KIAA1109,RIF1,CRTAP,LUC7L,GCC2,OLA1,CTNNBL1,RPL23A,POLD1,TIMM8B,NDUFC2,YWHAQ,MTX3,PNISR,PTRHD1,TTBK2,NASP,CHD2,PEX2,FAM50A…
HPA	cerebellum; Purkinje cells[≥Low]	HPA:0090161	3.938210632661669e-12	11.404701059615793	5498	174	134	10877	RPL41,UQCRHL,SELENOT,BCKDHA,DMAC1,GOLGA4,INO80D,SAFB2,CNIH1,GOLGA3,SMG1,HDGFL2,SAFB,KCMF1,RPS14,KIAA0232,SLC38A10,ZNF638,ZNF207,SREK1,N4BP2,ZBTB37,ATP5MG,NUMA1,SNRPG,COX7C,UPF1,RBM6,ZNF37A,NONO,NIPBL,RANBP2,ANKRD12,KRI1,KIF3A,RSF1,CNIH4,GAK,RIF1,CRTAP,LUC7L,GCC2,OLA1,CTNNBL1,POLD1,NDUFC2,YWHAQ,MTX3,PNISR,PTRHD1,TTBK2,NASP,CHD2,FAM50A,MBD3,RNF139,PPP2CA,SURF6,EDF1,RRBP1,PSMC5,AXIN1,GRIPAP1,ARFRP1,…
HPA	thyroid gland; glandular cells[≥Medium]	HPA:0590052	4.355733146915697e-12	11.360938735062266	5505	174	134	10877	RPL41,UQCRHL,BCKDHA,GOLGA4,INO80D,SAFB2,CNIH1,GOLGA3,SMG1,HDGFL2,SAFB,KCMF1,RPS14,CCDC88B,KIAA0232,SLC38A10,FKBP2,ZNF638,ZNF207,SREK1,N4BP2,ZBTB37,ATP5MG,NUMA1,SNRPG,COX7C,UPF1,RBM6,ZNF37A,NONO,NIPBL,RANBP2,ANKRD12,KRI1,MMADHC,UBTF,RSF1,CNIH4,GAK,KIAA1109,RIF1,CRTAP,LUC7L,GCC2,OLA1,CTNNBL1,POLD1,TIMM8B,PNISR,PTRHD1,TTBK2,CHD2,FAM50A,MBD3,RNF139,PPP2CA,SURF6,EDF1,RRBP1,PSMC5,AXIN1,GRIPAP1,UBXN7,HT…
HPA	smooth muscle	HPA:0490000	4.746609030489081e-12	11.323616538851239	5374	174	132	10877	SELENOT,BCKDHA,GOLGA4,INO80D,SAFB2,CNIH1,GOLGA3,SMG1,HDGFL2,SAFB,RPS14,KIAA0232,SLC38A10,ZNF638,ZNF207,SREK1,N4BP2,ZBTB37,ATP5MG,NUMA1,SNRPG,COX7C,RBM6,ZNF37A,NONO,NIPBL,RANBP2,ANKRD12,MMADHC,UBTF,RSF1,GAK,KIAA1109,RIF1,CRTAP,LUC7L,GCC2,OLA1,RPL23A,POLD1,NDUFC2,MTX3,PNISR,TTBK2,NASP,CHD2,FAM50A,MBD3,PPP2CA,SURF6,EDF1,RRBP1,PSMC5,AXIN1,UBXN7,HTATSF1,ARFRP1,MOB1B,RER1,EIF3CL,CDK11B,PELP1,ZNF707,GOL…
HPA	smooth muscle; smooth muscle cells[≥Low]	HPA:0490691	4.746609030489081e-12	11.323616538851239	5374	174	132	10877	SELENOT,BCKDHA,GOLGA4,INO80D,SAFB2,CNIH1,GOLGA3,SMG1,HDGFL2,SAFB,RPS14,KIAA0232,SLC38A10,ZNF638,ZNF207,SREK1,N4BP2,ZBTB37,ATP5MG,NUMA1,SNRPG,COX7C,RBM6,ZNF37A,NONO,NIPBL,RANBP2,ANKRD12,MMADHC,UBTF,RSF1,GAK,KIAA1109,RIF1,CRTAP,LUC7L,GCC2,OLA1,RPL23A,POLD1,NDUFC2,MTX3,PNISR,TTBK2,NASP,CHD2,FAM50A,MBD3,PPP2CA,SURF6,EDF1,RRBP1,PSMC5,AXIN1,UBXN7,HTATSF1,ARFRP1,MOB1B,RER1,EIF3CL,CDK11B,PELP1,ZNF707,GOL…
HPA	tonsil	HPA:0600000	5.383150775441702e-12	11.268963455958916	7677	174	161	10877	RPL41,UQCRHL,SELENOT,BCKDHA,DMAC1,GOLGA4,INO80D,SAFB2,CNIH1,GOLGA3,SMG1,HDGFL2,SAFB,KCMF1,RPS14,CCDC88B,KIAA0232,SLC38A10,FKBP2,ZNF638,ZNF207,SREK1,N4BP2,ZBTB37,ATP5MG,NUMA1,SNRPG,COX7C,UPF1,RBM6,ZNF37A,NONO,NIPBL,RANBP2,ANKRD12,KRI1,KIF7,KIF3A,MMADHC,UBTF,RSF1,GAK,KIAA1109,RIF1,CRTAP,LUC7L,GCC2,OLA1,CTNNBL1,RPL23A,POLD1,TIMM8B,NDUFC2,YWHAQ,MTX3,PNISR,PTRHD1,TTBK2,NASP,CHD2,PEX2,FAM50A,MBD3,SREK1…
HPA	stomach 1; glandular cells[≥Medium]	HPA:0540052	6.119979342912186e-12	11.213250043748946	6256	174	144	10877	RPL41,UQCRHL,BCKDHA,GOLGA4,INO80D,SAFB2,CNIH1,GOLGA3,SMG1,HDGFL2,SAFB,KCMF1,RPS14,KIAA0232,SLC38A10,FKBP2,ZNF638,ZNF207,SREK1,ZBTB37,LYPLA1,ATP5MG,NUMA1,SNRPG,COX7C,UPF1,RBM6,ZNF37A,NONO,NIPBL,RANBP2,ANKRD12,KRI1,KIF7,KIF3A,MMADHC,UBTF,CNIH4,GAK,RIF1,CRTAP,LUC7L,GCC2,OLA1,CTNNBL1,RPL23A,POLD1,TIMM8B,NDUFC2,MTX3,PNISR,PTRHD1,NASP,CHD2,PEX2,FAM50A,PPP2CA,SURF6,EDF1,RRBP1,PSMC5,AXIN1,GRIPAP1,UBXN7,H…
HPA	skin 1; keratinocytes[≥Low]	HPA:0460661	6.157739347534827e-12	11.210578698401823	6107	174	142	10877	RPL41,UQCRHL,SELENOT,BCKDHA,DMAC1,GOLGA4,INO80D,SAFB2,CNIH1,GOLGA3,ALMS1,SMG1,HDGFL2,SAFB,KCMF1,RPS14,CCDC88B,SLC38A10,FKBP2,ZNF638,ZNF207,SREK1,N4BP2,ZBTB37,NUMA1,SNRPG,COX7C,UPF1,RBM6,ZNF37A,NONO,NIPBL,RANBP2,ANKRD12,KRI1,KIF7,KIF3A,UBTF,RSF1,GAK,KIAA1109,RIF1,CRTAP,LUC7L,GCC2,OLA1,CTNNBL1,RPL23A,POLD1,TIMM8B,NDUFC2,YWHAQ,PNISR,PTRHD1,NASP,CHD2,PEX2,FAM50A,MBD3,SREK1IP1,RNF139,PPP2CA,SURF6,EDF1…
HPA	fallopian tube; glandular cells[≥Medium]	HPA:0210052	8.33469278765645e-12	11.079110403404597	5074	174	127	10877	RPL41,UQCRHL,BCKDHA,GOLGA4,INO80D,SAFB2,CNIH1,SMG1,HDGFL2,SAFB,KCMF1,RPS14,KIAA0232,SLC38A10,ZNF638,ZNF207,SREK1,ZBTB37,LYPLA1,ATP5MG,NUMA1,SNRPG,COX7C,UPF1,ZNF37A,NONO,NIPBL,RANBP2,ANKRD12,KRI1,KIF7,MMADHC,UBTF,RSF1,CNIH4,GAK,KIAA1109,RIF1,CRTAP,LUC7L,GCC2,OLA1,CTNNBL1,POLD1,TIMM8B,NDUFC2,YWHAQ,MTX3,PNISR,NASP,PEX2,FAM50A,RNF139,PPP2CA,SURF6,EDF1,RRBP1,PSMC5,AXIN1,GRIPAP1,UBXN7,HTATSF1,ARFRP1,MO…
HPA	endometrium 1; cells in endometrial stroma[≥Low]	HPA:0160251	8.33469278765645e-12	11.079110403404597	4009	174	110	10877	RPL41,BCKDHA,DMAC1,GOLGA4,INO80D,SAFB2,CNIH1,GOLGA3,HDGFL2,SAFB,RPS14,CCDC88B,KIAA0232,ZNF638,ZNF207,SREK1,ZBTB37,ATP5MG,NUMA1,SNRPG,COX7C,RBM6,ZNF37A,NONO,RANBP2,ANKRD12,KRI1,MMADHC,UBTF,RSF1,RIF1,CRTAP,LUC7L,POLD1,NDUFC2,YWHAQ,PNISR,PTRHD1,TTBK2,NASP,PEX2,FAM50A,RNF139,PPP2CA,SURF6,EDF1,RRBP1,PSMC5,UBXN7,HTATSF1,ARFRP1,MOB1B,RER1,EIF3CL,CDK11B,PELP1,ZNF707,GOLGB1,DAPK3,DAZAP1,CCDC9,RPL10A,TELO2…
HPA	skin 1	HPA:0460000	8.401765128527421e-12	11.075629463337213	6996	174	153	10877	RPL41,UQCRHL,SELENOT,BCKDHA,DMAC1,GOLGA4,INO80D,SAFB2,CNIH1,GOLGA3,ALMS1,SMG1,HDGFL2,SAFB,KCMF1,RPS14,CCDC88B,SLC38A10,FKBP2,ZNF638,ZNF207,SREK1,N4BP2,ZBTB37,ATP5MG,NUMA1,SNRPG,COX7C,UPF1,RBM6,ZNF37A,NONO,NIPBL,RANBP2,ANKRD12,KRI1,KIF7,KIF3A,MMADHC,UBTF,RSF1,CNIH4,GAK,KIAA1109,RIF1,CRTAP,LUC7L,GCC2,OLA1,CTNNBL1,RPL23A,POLD1,TIMM8B,NDUFC2,YWHAQ,PNISR,PTRHD1,TTBK2,NASP,CHD2,PEX2,FAM50A,MBD3,SREK1IP…
HPA	breast	HPA:0050000	8.768224014947864e-12	11.057088363146553	7084	174	154	10877	RPL41,UQCRHL,SELENOT,BCKDHA,DMAC1,GOLGA4,INO80D,SAFB2,CNIH1,GOLGA3,ALMS1,HDGFL2,SAFB,KCMF1,RPS14,CCDC88B,KIAA0232,SLC38A10,ZNF638,ZNF207,SREK1,N4BP2,ZBTB37,ATP5MG,NUMA1,SNRPG,COX7C,UPF1,RBM6,ZNF37A,NONO,NIPBL,RANBP2,ANKRD12,KRI1,KIF7,MMADHC,UBTF,RSF1,GAK,RIF1,CRTAP,LUC7L,GCC2,OLA1,CTNNBL1,RPL23A,POLD1,TIMM8B,NDUFC2,YWHAQ,MTX3,PNISR,PTRHD1,TTBK2,NASP,CHD2,FAM50A,MBD3,SREK1IP1,RNF139,PPP2CA,SURF6,E…
HPA	breast; glandular cells[≥Medium]	HPA:0050052	1.00882450858274e-11	10.996184375470513	5024	174	126	10877	RPL41,UQCRHL,BCKDHA,GOLGA4,INO80D,SAFB2,CNIH1,GOLGA3,HDGFL2,SAFB,KCMF1,RPS14,CCDC88B,KIAA0232,SLC38A10,ZNF638,ZNF207,SREK1,N4BP2,ZBTB37,ATP5MG,NUMA1,SNRPG,COX7C,UPF1,RBM6,ZNF37A,NONO,NIPBL,RANBP2,ANKRD12,KIF7,MMADHC,UBTF,RSF1,GAK,RIF1,CRTAP,LUC7L,GCC2,OLA1,CTNNBL1,POLD1,TIMM8B,NDUFC2,YWHAQ,MTX3,PNISR,FAM50A,MBD3,PPP2CA,SURF6,EDF1,PSMC5,AXIN1,GRIPAP1,UBXN7,HTATSF1,ARFRP1,RER1,EIF3CL,CDK11B,PELP1,Z…
HPA	vagina; squamous epithelial cells[≥Low]	HPA:0620221	1.00882450858274e-11	10.996184375470513	5923	174	139	10877	RPL41,UQCRHL,BCKDHA,DMAC1,GOLGA4,INO80D,SAFB2,CNIH1,GOLGA3,ALMS1,HDGFL2,SAFB,KCMF1,RPS14,KIAA0232,SLC38A10,ZNF638,ZNF207,SREK1,N4BP2,ZBTB37,ATP5MG,NUMA1,SNRPG,COX7C,UPF1,RBM6,ZNF37A,NONO,NIPBL,RANBP2,ANKRD12,KRI1,KIF7,MMADHC,UBTF,RSF1,CNIH4,GAK,RIF1,CRTAP,LUC7L,GCC2,OLA1,CTNNBL1,RPL23A,POLD1,TIMM8B,NDUFC2,YWHAQ,PNISR,PTRHD1,NASP,CHD2,PEX2,FAM50A,SREK1IP1,PPP2CA,SURF6,EDF1,RRBP1,PSMC5,AXIN1,GRIPAP…
HPA	colon	HPA:0130000	1.00882450858274e-11	10.996184375470513	8020	174	164	10877	RPL41,UQCRHL,SELENOT,BCKDHA,DMAC1,GOLGA4,INO80D,SAFB2,CNIH1,GOLGA3,ALMS1,SMG1,HDGFL2,SAFB,KCMF1,RPS14,CCDC88B,KIAA0232,SLC38A10,FKBP2,ZNF638,ZNF207,SREK1,N4BP2,ZBTB37,LYPLA1,NUMA1,SNRPG,COX7C,UPF1,RBM6,ZNF37A,NONO,NIPBL,RANBP2,ANKRD12,KRI1,KIF7,KIF3A,MMADHC,UBTF,RSF1,CNIH4,GAK,KIAA1109,RIF1,CRTAP,LUC7L,GCC2,OLA1,CTNNBL1,RPL23A,POLD1,TIMM8B,NDUFC2,YWHAQ,MTX3,PNISR,PTRHD1,TTBK2,NASP,CHD2,PEX2,FAM50…
HPA	vagina	HPA:0620000	1.00882450858274e-11	10.996184375470513	5923	174	139	10877	RPL41,UQCRHL,BCKDHA,DMAC1,GOLGA4,INO80D,SAFB2,CNIH1,GOLGA3,ALMS1,HDGFL2,SAFB,KCMF1,RPS14,KIAA0232,SLC38A10,ZNF638,ZNF207,SREK1,N4BP2,ZBTB37,ATP5MG,NUMA1,SNRPG,COX7C,UPF1,RBM6,ZNF37A,NONO,NIPBL,RANBP2,ANKRD12,KRI1,KIF7,MMADHC,UBTF,RSF1,CNIH4,GAK,RIF1,CRTAP,LUC7L,GCC2,OLA1,CTNNBL1,RPL23A,POLD1,TIMM8B,NDUFC2,YWHAQ,PNISR,PTRHD1,NASP,CHD2,PEX2,FAM50A,SREK1IP1,PPP2CA,SURF6,EDF1,RRBP1,PSMC5,AXIN1,GRIPAP…
HPA	fallopian tube; glandular cells[≥Low]	HPA:0210051	1.00882450858274e-11	10.996184375470513	6145	174	142	10877	RPL41,UQCRHL,SELENOT,BCKDHA,DMAC1,GOLGA4,INO80D,SAFB2,CNIH1,ALMS1,SMG1,HDGFL2,SAFB,KCMF1,RPS14,KIAA0232,SLC38A10,ZNF638,ZNF207,SREK1,ZBTB37,LYPLA1,ATP5MG,NUMA1,SNRPG,COX7C,UPF1,ZNF37A,NONO,NIPBL,RANBP2,ANKRD12,KRI1,KIF7,MMADHC,UBTF,RSF1,CNIH4,GAK,KIAA1109,RIF1,CRTAP,LUC7L,GCC2,OLA1,CTNNBL1,POLD1,TIMM8B,NDUFC2,YWHAQ,MTX3,PNISR,NASP,PEX2,FAM50A,MBD3,RNF139,PPP2CA,SURF6,EDF1,RRBP1,PSMC5,AXIN1,GRIPAP…
HPA	lung; macrophages[≥Low]	HPA:0300411	1.07036159837992e-11	10.970469480584162	6690	174	149	10877	RPL41,SELENOT,BCKDHA,DMAC1,GOLGA4,INO80D,SAFB2,CNIH1,GOLGA3,ALMS1,HDGFL2,SAFB,KCMF1,RPS14,CCDC88B,KIAA0232,SLC38A10,ZNF638,ZNF207,SREK1,N4BP2,ZBTB37,LYPLA1,ATP5MG,NUMA1,SNRPG,COX7C,UPF1,RBM6,ZNF37A,NONO,NIPBL,RANBP2,ANKRD12,KRI1,MMADHC,UBTF,RSF1,CNIH4,GAK,KIAA1109,RIF1,CRTAP,LUC7L,GCC2,OLA1,CTNNBL1,RPL23A,POLD1,TIMM8B,PNISR,PTRHD1,TTBK2,CHD2,PEX2,FAM50A,MBD3,SREK1IP1,RNF139,PPP2CA,SURF6,EDF1,RRBP…
HPA	oral mucosa; squamous epithelial cells[≥Low]	HPA:0330221	1.2191506333020802e-11	10.913942631403561	6161	174	142	10877	RPL41,UQCRHL,BCKDHA,DMAC1,GOLGA4,SAFB2,CNIH1,GOLGA3,ALMS1,HDGFL2,SAFB,KCMF1,RPS14,KIAA0232,SLC38A10,ZNF638,ZNF207,SREK1,N4BP2,ZBTB37,ATP5MG,NUMA1,SNRPG,COX7C,UPF1,RBM6,ZNF37A,NONO,NIPBL,RANBP2,ANKRD12,KRI1,KIF7,KIF3A,UBTF,RSF1,CNIH4,RIF1,CRTAP,LUC7L,OLA1,CTNNBL1,RPL23A,POLD1,TIMM8B,NDUFC2,YWHAQ,PNISR,PTRHD1,NASP,CHD2,PEX2,FAM50A,MBD3,SREK1IP1,PPP2CA,SURF6,EDF1,RRBP1,PSMC5,AXIN1,GRIPAP1,UBXN7,HTAT…
HPA	oral mucosa	HPA:0330000	1.2191506333020802e-11	10.913942631403561	6161	174	142	10877	RPL41,UQCRHL,BCKDHA,DMAC1,GOLGA4,SAFB2,CNIH1,GOLGA3,ALMS1,HDGFL2,SAFB,KCMF1,RPS14,KIAA0232,SLC38A10,ZNF638,ZNF207,SREK1,N4BP2,ZBTB37,ATP5MG,NUMA1,SNRPG,COX7C,UPF1,RBM6,ZNF37A,NONO,NIPBL,RANBP2,ANKRD12,KRI1,KIF7,KIF3A,UBTF,RSF1,CNIH4,RIF1,CRTAP,LUC7L,OLA1,CTNNBL1,RPL23A,POLD1,TIMM8B,NDUFC2,YWHAQ,PNISR,PTRHD1,NASP,CHD2,PEX2,FAM50A,MBD3,SREK1IP1,PPP2CA,SURF6,EDF1,RRBP1,PSMC5,AXIN1,GRIPAP1,UBXN7,HTAT…
HPA	cerebellum	HPA:0090000	1.2191506333020802e-11	10.913942631403561	7114	174	154	10877	RPL41,UQCRHL,SELENOT,BCKDHA,DMAC1,GOLGA4,INO80D,SAFB2,CNIH1,GOLGA3,SMG1,HDGFL2,SAFB,KCMF1,RPS14,KIAA0232,SLC38A10,FKBP2,ZNF638,ZNF207,SREK1,N4BP2,ZBTB37,ATP5MG,NUMA1,SNRPG,COX7C,UPF1,RBM6,ZNF37A,NONO,NIPBL,RANBP2,ANKRD12,KRI1,KIF7,KIF3A,MMADHC,UBTF,RSF1,CNIH4,GAK,RIF1,CRTAP,LUC7L,GCC2,OLA1,CTNNBL1,POLD1,TIMM8B,NDUFC2,YWHAQ,MTX3,PNISR,PTRHD1,TTBK2,NASP,CHD2,FAM50A,MBD3,RNF139,CEP131,PPP2CA,SURF6,E…
HPA	appendix	HPA:0030000	1.2191506333020802e-11	10.913942631403561	7644	174	160	10877	RPL41,UQCRHL,SELENOT,BCKDHA,DMAC1,GOLGA4,INO80D,SAFB2,CNIH1,GOLGA3,ALMS1,SMG1,HDGFL2,SAFB,KCMF1,RPS14,CCDC88B,KIAA0232,SLC38A10,ZNF638,ZNF207,SREK1,N4BP2,ZBTB37,LYPLA1,ATP5MG,NUMA1,SNRPG,COX7C,UPF1,RBM6,ZNF37A,NONO,NIPBL,RANBP2,ANKRD12,KRI1,KIF7,KIF3A,MMADHC,UBTF,RSF1,CNIH4,GAK,KIAA1109,RIF1,CRTAP,LUC7L,GCC2,OLA1,CTNNBL1,RPL23A,POLD1,TIMM8B,NDUFC2,YWHAQ,MTX3,PNISR,PTRHD1,TTBK2,NASP,CHD2,PEX2,FAM5…
HPA	rectum; glandular cells[≥Medium]	HPA:0400052	1.2191506333020802e-11	10.913942631403561	6468	174	146	10877	RPL41,UQCRHL,SELENOT,BCKDHA,GOLGA4,INO80D,SAFB2,CNIH1,GOLGA3,ALMS1,SMG1,HDGFL2,SAFB,KCMF1,RPS14,KIAA0232,SLC38A10,ZNF638,ZNF207,SREK1,N4BP2,ZBTB37,LYPLA1,ATP5MG,NUMA1,SNRPG,COX7C,UPF1,RBM6,ZNF37A,NONO,NIPBL,RANBP2,ANKRD12,KRI1,UBTF,RSF1,CNIH4,GAK,KIAA1109,RIF1,CRTAP,LUC7L,GCC2,OLA1,CTNNBL1,RPL23A,POLD1,TIMM8B,NDUFC2,YWHAQ,MTX3,PNISR,PTRHD1,NASP,CHD2,FAM50A,MBD3,PPP2CA,SURF6,EDF1,RRBP1,PSMC5,AXIN1…
HPA	urinary bladder	HPA:0610000	1.2191506333020802e-11	10.913942631403561	7201	174	155	10877	RPL41,UQCRHL,BCKDHA,DMAC1,GOLGA4,INO80D,SAFB2,CNIH1,GOLGA3,SMG1,HDGFL2,SAFB,KCMF1,RPS14,CCDC88B,KIAA0232,SLC38A10,ZNF638,ZNF207,SREK1,N4BP2,ZBTB37,LYPLA1,ATP5MG,NUMA1,SNRPG,COX7C,UPF1,RBM6,ZNF37A,NONO,NIPBL,RANBP2,ANKRD12,KRI1,KIF7,KIF3A,MMADHC,UBTF,RSF1,CNIH4,GAK,KIAA1109,RIF1,CRTAP,LUC7L,GCC2,OLA1,CTNNBL1,RPL23A,POLD1,TIMM8B,NDUFC2,YWHAQ,MTX3,PNISR,PTRHD1,TTBK2,NASP,CHD2,PEX2,FAM50A,MBD3,RNF139…
HPA	urinary bladder; urothelial cells[≥Low]	HPA:0610831	1.2191506333020802e-11	10.913942631403561	7201	174	155	10877	RPL41,UQCRHL,BCKDHA,DMAC1,GOLGA4,INO80D,SAFB2,CNIH1,GOLGA3,SMG1,HDGFL2,SAFB,KCMF1,RPS14,CCDC88B,KIAA0232,SLC38A10,ZNF638,ZNF207,SREK1,N4BP2,ZBTB37,LYPLA1,ATP5MG,NUMA1,SNRPG,COX7C,UPF1,RBM6,ZNF37A,NONO,NIPBL,RANBP2,ANKRD12,KRI1,KIF7,KIF3A,MMADHC,UBTF,RSF1,CNIH4,GAK,KIAA1109,RIF1,CRTAP,LUC7L,GCC2,OLA1,CTNNBL1,RPL23A,POLD1,TIMM8B,NDUFC2,YWHAQ,MTX3,PNISR,PTRHD1,TTBK2,NASP,CHD2,PEX2,FAM50A,MBD3,RNF139…
HPA	ovary; ovarian stroma cells[≥Low]	HPA:0340461	1.294367115395605e-11	10.887942529248216	3928	174	108	10877	RPL41,BCKDHA,DMAC1,GOLGA4,INO80D,SAFB2,CNIH1,GOLGA3,HDGFL2,SAFB,KCMF1,RPS14,CCDC88B,ZNF638,ZNF207,SREK1,ZBTB37,ATP5MG,NUMA1,SNRPG,COX7C,UPF1,RBM6,ZNF37A,NONO,NIPBL,RANBP2,ANKRD12,KIF7,UBTF,RSF1,RIF1,CRTAP,LUC7L,GCC2,OLA1,POLD1,YWHAQ,MTX3,PNISR,TTBK2,CHD2,PEX2,FAM50A,MBD3,RNF139,PPP2CA,SURF6,EDF1,RRBP1,PSMC5,AXIN1,UBXN7,HTATSF1,RER1,EIF3CL,CDK11B,PELP1,ZNF707,GOLGB1,DAPK3,DAZAP1,CCDC9,TELO2,MINDY2…
HPA	caudate	HPA:0080000	1.3589972332509604e-11	10.86678142743606	6874	174	151	10877	RPL41,UQCRHL,SELENOT,BCKDHA,DMAC1,GOLGA4,INO80D,SAFB2,CNIH1,GOLGA3,SMG1,HDGFL2,SAFB,RPS14,KIAA0232,SLC38A10,FKBP2,ZNF638,ZNF207,SREK1,N4BP2,ZBTB37,LYPLA1,ATP5MG,NUMA1,SNRPG,COX7C,UPF1,RBM6,ZNF37A,NONO,NIPBL,RANBP2,ANKRD12,KRI1,KIF7,KIF3A,MMADHC,UBTF,RSF1,CNIH4,GAK,KIAA1109,RIF1,CRTAP,LUC7L,GCC2,OLA1,CTNNBL1,RPL23A,POLD1,TIMM8B,NDUFC2,YWHAQ,MTX3,PNISR,PTRHD1,NASP,CHD2,PEX2,FAM50A,MBD3,RNF139,PPP2C…
HPA	lymph node; germinal center cells[≥Low]	HPA:0310431	1.4483210062461644e-11	10.839135170327648	4991	174	125	10877	RPL41,UQCRHL,BCKDHA,GOLGA4,INO80D,SAFB2,CNIH1,GOLGA3,SMG1,HDGFL2,SAFB,KCMF1,RPS14,CCDC88B,SLC38A10,FKBP2,ZNF207,SREK1,N4BP2,ZBTB37,ATP5MG,NUMA1,SNRPG,COX7C,UPF1,RBM6,ZNF37A,NONO,RANBP2,ANKRD12,UBTF,CNIH4,RIF1,CRTAP,GCC2,OLA1,RPL23A,POLD1,TIMM8B,YWHAQ,PTRHD1,NASP,PEX2,FAM50A,MBD3,PPP2CA,SURF6,EDF1,RRBP1,PSMC5,AXIN1,GRIPAP1,UBXN7,HTATSF1,ARFRP1,MOB1B,RER1,EIF3CL,CDK11B,ZNF707,GOLGB1,DAPK3,MACF1,DAZ…
HPA	salivary gland	HPA:0420000	1.4838601863755102e-11	10.828607017619081	6802	174	150	10877	RPL41,UQCRHL,SELENOT,BCKDHA,DMAC1,GOLGA4,INO80D,SAFB2,CNIH1,GOLGA3,SMG1,HDGFL2,SAFB,KCMF1,RPS14,CCDC88B,KIAA0232,SLC38A10,FKBP2,ZNF638,ZNF207,SREK1,N4BP2,ZBTB37,LYPLA1,ATP5MG,NUMA1,SNRPG,COX7C,UPF1,RBM6,ZNF37A,NONO,NIPBL,RANBP2,ANKRD12,KIF7,KIF3A,MMADHC,UBTF,RSF1,CNIH4,GAK,RIF1,CRTAP,LUC7L,GCC2,OLA1,CTNNBL1,RPL23A,POLD1,TIMM8B,NDUFC2,YWHAQ,MTX3,PNISR,PTRHD1,NASP,CHD2,FAM50A,SREK1IP1,PPP2CA,SURF6,…
HPA	salivary gland; glandular cells[≥Low]	HPA:0420051	1.4838601863755102e-11	10.828607017619081	6802	174	150	10877	RPL41,UQCRHL,SELENOT,BCKDHA,DMAC1,GOLGA4,INO80D,SAFB2,CNIH1,GOLGA3,SMG1,HDGFL2,SAFB,KCMF1,RPS14,CCDC88B,KIAA0232,SLC38A10,FKBP2,ZNF638,ZNF207,SREK1,N4BP2,ZBTB37,LYPLA1,ATP5MG,NUMA1,SNRPG,COX7C,UPF1,RBM6,ZNF37A,NONO,NIPBL,RANBP2,ANKRD12,KIF7,KIF3A,MMADHC,UBTF,RSF1,CNIH4,GAK,RIF1,CRTAP,LUC7L,GCC2,OLA1,CTNNBL1,RPL23A,POLD1,TIMM8B,NDUFC2,YWHAQ,MTX3,PNISR,PTRHD1,NASP,CHD2,FAM50A,SREK1IP1,PPP2CA,SURF6,…
HPA	duodenum	HPA:0150000	1.4838601863755102e-11	10.828607017619081	7666	174	160	10877	RPL41,UQCRHL,SELENOT,BCKDHA,DMAC1,GOLGA4,INO80D,SAFB2,CNIH1,GOLGA3,ALMS1,SMG1,HDGFL2,SAFB,KCMF1,RPS14,CCDC88B,KIAA0232,SLC38A10,FKBP2,ZNF638,ZNF207,SREK1,N4BP2,ZBTB37,LYPLA1,ATP5MG,NUMA1,SNRPG,COX7C,UPF1,RBM6,ZNF37A,NONO,NIPBL,RANBP2,ANKRD12,KRI1,KIF7,MMADHC,UBTF,RSF1,CNIH4,GAK,KIAA1109,RIF1,CRTAP,LUC7L,GCC2,OLA1,CTNNBL1,RPL23A,POLD1,TIMM8B,NDUFC2,YWHAQ,MTX3,PNISR,PTRHD1,TTBK2,NASP,CHD2,PEX2,FAM5…
HPA	duodenum; glandular cells[≥Low]	HPA:0150051	1.4838601863755102e-11	10.828607017619081	7666	174	160	10877	RPL41,UQCRHL,SELENOT,BCKDHA,DMAC1,GOLGA4,INO80D,SAFB2,CNIH1,GOLGA3,ALMS1,SMG1,HDGFL2,SAFB,KCMF1,RPS14,CCDC88B,KIAA0232,SLC38A10,FKBP2,ZNF638,ZNF207,SREK1,N4BP2,ZBTB37,LYPLA1,ATP5MG,NUMA1,SNRPG,COX7C,UPF1,RBM6,ZNF37A,NONO,NIPBL,RANBP2,ANKRD12,KRI1,KIF7,MMADHC,UBTF,RSF1,CNIH4,GAK,KIAA1109,RIF1,CRTAP,LUC7L,GCC2,OLA1,CTNNBL1,RPL23A,POLD1,TIMM8B,NDUFC2,YWHAQ,MTX3,PNISR,PTRHD1,TTBK2,NASP,CHD2,PEX2,FAM5…
HPA	hippocampus	HPA:0250000	1.797166023936615e-11	10.74541180049317	6734	174	149	10877	RPL41,UQCRHL,SELENOT,BCKDHA,DMAC1,GOLGA4,INO80D,SAFB2,CNIH1,GOLGA3,SMG1,HDGFL2,SAFB,KCMF1,RPS14,KIAA0232,SLC38A10,FKBP2,ZNF638,ZNF207,SREK1,ZBTB37,LYPLA1,ATP5MG,NUMA1,SNRPG,COX7C,UPF1,RBM6,ZNF37A,NONO,NIPBL,RANBP2,ANKRD12,KRI1,KIF7,KIF3A,MMADHC,UBTF,RSF1,CNIH4,GAK,RIF1,CRTAP,LUC7L,GCC2,OLA1,CTNNBL1,POLD1,TIMM8B,NDUFC2,YWHAQ,MTX3,PNISR,TTBK2,NASP,CHD2,PEX2,FAM50A,MBD3,RNF139,PPP2CA,SURF6,EDF1,RRBP…
HPA	prostate; glandular cells[≥Low]	HPA:0390051	2.071990435898073e-11	10.683612253582345	6586	174	147	10877	RPL41,UQCRHL,BCKDHA,DMAC1,GOLGA4,INO80D,SAFB2,CNIH1,GOLGA3,ALMS1,SMG1,HDGFL2,SAFB,KCMF1,RPS14,CCDC88B,KIAA0232,SLC38A10,ZNF638,ZNF207,SREK1,N4BP2,ZBTB37,LYPLA1,ATP5MG,NUMA1,SNRPG,COX7C,UPF1,RBM6,ZNF37A,NONO,RANBP2,ANKRD12,KRI1,KIF7,MMADHC,UBTF,RSF1,CNIH4,GAK,KIAA1109,RIF1,CRTAP,LUC7L,GCC2,OLA1,CTNNBL1,POLD1,TIMM8B,NDUFC2,YWHAQ,MTX3,PNISR,TTBK2,NASP,CHD2,PEX2,FAM50A,SREK1IP1,RNF139,PPP2CA,SURF6,ED…
HPA	prostate	HPA:0390000	2.071990435898073e-11	10.683612253582345	6586	174	147	10877	RPL41,UQCRHL,BCKDHA,DMAC1,GOLGA4,INO80D,SAFB2,CNIH1,GOLGA3,ALMS1,SMG1,HDGFL2,SAFB,KCMF1,RPS14,CCDC88B,KIAA0232,SLC38A10,ZNF638,ZNF207,SREK1,N4BP2,ZBTB37,LYPLA1,ATP5MG,NUMA1,SNRPG,COX7C,UPF1,RBM6,ZNF37A,NONO,RANBP2,ANKRD12,KRI1,KIF7,MMADHC,UBTF,RSF1,CNIH4,GAK,KIAA1109,RIF1,CRTAP,LUC7L,GCC2,OLA1,CTNNBL1,POLD1,TIMM8B,NDUFC2,YWHAQ,MTX3,PNISR,TTBK2,NASP,CHD2,PEX2,FAM50A,SREK1IP1,RNF139,PPP2CA,SURF6,ED…
HPA	nasopharynx; respiratory epithelial cells[≥Low]	HPA:0320101	2.3065680628571444e-11	10.637033725583287	6137	174	141	10877	RPL41,UQCRHL,SELENOT,BCKDHA,DMAC1,GOLGA4,INO80D,SAFB2,CNIH1,ALMS1,SMG1,HDGFL2,SAFB,KCMF1,RPS14,KIAA0232,SLC38A10,ZNF638,ZNF207,SREK1,N4BP2,ZBTB37,LYPLA1,ATP5MG,NUMA1,SNRPG,COX7C,UPF1,ZNF37A,NONO,NIPBL,RANBP2,ANKRD12,KRI1,KIF7,MMADHC,UBTF,RSF1,CNIH4,GAK,KIAA1109,CRTAP,LUC7L,GCC2,OLA1,CTNNBL1,POLD1,TIMM8B,YWHAQ,MTX3,PNISR,NASP,PEX2,FAM50A,MBD3,PPP2CA,SURF6,EDF1,RRBP1,PSMC5,AXIN1,GRIPAP1,UBXN7,HTATS…
HPA	liver	HPA:0290000	2.3427175270494782e-11	10.63028007326358	6213	174	142	10877	RPL41,UQCRHL,SELENOT,BCKDHA,DMAC1,GOLGA4,INO80D,SAFB2,CNIH1,GOLGA3,SMG1,HDGFL2,SAFB,RPS14,CCDC88B,KIAA0232,SLC38A10,ZNF638,ZNF207,SREK1,N4BP2,ZBTB37,LYPLA1,ATP5MG,NUMA1,SNRPG,COX7C,UPF1,RBM6,ZNF37A,NONO,RANBP2,ANKRD12,KRI1,KIF7,MMADHC,UBTF,CNIH4,GAK,RIF1,CRTAP,LUC7L,GCC2,OLA1,CTNNBL1,RPL23A,POLD1,TIMM8B,NDUFC2,YWHAQ,MTX3,NASP,CHD2,PEX2,FAM50A,RNF139,PPP2CA,SURF6,EDF1,RRBP1,PSMC5,AXIN1,GRIPAP1,UBX…
HPA	cervix, uterine; squamous epithelial cells[≥Low]	HPA:0110221	3.4092892959407577e-11	10.467336145060353	5383	174	130	10877	RPL41,UQCRHL,BCKDHA,DMAC1,INO80D,SAFB2,CNIH1,GOLGA3,ALMS1,HDGFL2,SAFB,RPS14,KIAA0232,SLC38A10,ZNF638,ZNF207,SREK1,N4BP2,ZBTB37,ATP5MG,NUMA1,SNRPG,COX7C,UPF1,RBM6,ZNF37A,NONO,NIPBL,RANBP2,ANKRD12,KRI1,UBTF,RSF1,CNIH4,GAK,RIF1,CRTAP,LUC7L,OLA1,CTNNBL1,POLD1,TIMM8B,NDUFC2,YWHAQ,PNISR,PTRHD1,TTBK2,NASP,CHD2,PEX2,FAM50A,PPP2CA,SURF6,EDF1,RRBP1,PSMC5,AXIN1,GRIPAP1,UBXN7,ARFRP1,MOB1B,RER1,EIF3CL,CDK11B,…
HPA	endometrium 2; cells in endometrial stroma[≥Medium]	HPA:0170252	3.8076162007251343e-11	10.419346834002777	1756	174	65	10877	RPL41,BCKDHA,GOLGA4,SAFB2,CNIH1,GOLGA3,HDGFL2,SAFB,RPS14,CCDC88B,ZNF638,ZNF207,SREK1,ZBTB37,ATP5MG,NUMA1,SNRPG,COX7C,RBM6,ZNF37A,NONO,ANKRD12,UBTF,RSF1,CRTAP,LUC7L,OLA1,PNISR,NASP,FAM50A,EDF1,RRBP1,HTATSF1,ARFRP1,EIF3CL,CDK11B,PELP1,ZNF707,GOLGB1,DAPK3,CCDC9,INTS1,CCDC12,PSENEN,HNRNPLL,CFAP410,SMG6,SNRNP70,AKAP13,UBXN1,CANX,EWSR1,SSB,DOHH,NCK1,NXF1,LUC7L3,PTPN11,THRAP3,PPT1,TBCA,DPP8,RAI1,NSMCE2,…
HPA	endometrium 2; glandular cells[≥Low]	HPA:0170051	3.8076162007251343e-11	10.419346834002777	6627	174	147	10877	RPL41,UQCRHL,SELENOT,BCKDHA,GOLGA4,INO80D,SAFB2,CNIH1,GOLGA3,SMG1,HDGFL2,SAFB,KCMF1,RPS14,CCDC88B,KIAA0232,SLC38A10,ZNF638,ZNF207,SREK1,N4BP2,ZBTB37,LYPLA1,ATP5MG,NUMA1,SNRPG,COX7C,UPF1,RBM6,ZNF37A,NONO,NIPBL,RANBP2,ANKRD12,KRI1,KIF7,MMADHC,UBTF,RSF1,CNIH4,GAK,KIAA1109,RIF1,CRTAP,LUC7L,GCC2,OLA1,POLD1,TIMM8B,NDUFC2,YWHAQ,MTX3,PNISR,PTRHD1,NASP,CHD2,PEX2,FAM50A,SREK1IP1,RNF139,CEP131,PPP2CA,SURF6,…
HPA	nasopharynx; respiratory epithelial cells[≥Medium]	HPA:0320102	4.035454212862005e-11	10.394107575926375	5061	174	125	10877	RPL41,UQCRHL,SELENOT,BCKDHA,DMAC1,GOLGA4,INO80D,SAFB2,CNIH1,SMG1,HDGFL2,SAFB,KCMF1,RPS14,KIAA0232,SLC38A10,ZNF638,ZNF207,SREK1,N4BP2,ZBTB37,LYPLA1,ATP5MG,NUMA1,SNRPG,COX7C,UPF1,ZNF37A,NONO,NIPBL,RANBP2,ANKRD12,KRI1,KIF7,MMADHC,UBTF,RSF1,CNIH4,KIAA1109,CRTAP,LUC7L,GCC2,OLA1,CTNNBL1,POLD1,TIMM8B,MTX3,PNISR,PEX2,FAM50A,PPP2CA,SURF6,EDF1,RRBP1,PSMC5,AXIN1,GRIPAP1,UBXN7,HTATSF1,ARFRP1,RER1,EIF3CL,CDK1…
HPA	caudate; neuronal cells[≥Medium]	HPA:0080132	4.049780383527718e-11	10.392568527602156	4061	174	109	10877	RPL41,UQCRHL,SELENOT,BCKDHA,GOLGA4,INO80D,SAFB2,CNIH1,GOLGA3,SMG1,HDGFL2,SAFB,RPS14,KIAA0232,FKBP2,ZNF638,ZNF207,N4BP2,ZBTB37,LYPLA1,ATP5MG,NUMA1,SNRPG,COX7C,UPF1,RBM6,NONO,NIPBL,RANBP2,ANKRD12,KRI1,KIF3A,UBTF,CNIH4,GAK,RIF1,LUC7L,GCC2,OLA1,CTNNBL1,POLD1,NDUFC2,YWHAQ,MTX3,PNISR,CHD2,FAM50A,RNF139,PPP2CA,SURF6,EDF1,RRBP1,PSMC5,AXIN1,GRIPAP1,HTATSF1,ARFRP1,RER1,EIF3CL,CDK11B,PELP1,GOLGB1,DAPK3,MACF…
HPA	breast; glandular cells[≥Low]	HPA:0050051	4.420106077625002e-11	10.354567307941771	6717	174	148	10877	RPL41,UQCRHL,SELENOT,BCKDHA,DMAC1,GOLGA4,INO80D,SAFB2,CNIH1,GOLGA3,ALMS1,HDGFL2,SAFB,KCMF1,RPS14,CCDC88B,KIAA0232,SLC38A10,ZNF638,ZNF207,SREK1,N4BP2,ZBTB37,ATP5MG,NUMA1,SNRPG,COX7C,UPF1,RBM6,ZNF37A,NONO,NIPBL,RANBP2,ANKRD12,KRI1,KIF7,MMADHC,UBTF,RSF1,GAK,RIF1,CRTAP,LUC7L,GCC2,OLA1,CTNNBL1,POLD1,TIMM8B,NDUFC2,YWHAQ,MTX3,PNISR,PTRHD1,NASP,CHD2,FAM50A,MBD3,RNF139,PPP2CA,SURF6,EDF1,RRBP1,PSMC5,AXIN1,…
HPA	pancreas; pancreatic endocrine cells[≥Low]	HPA:0351181	4.425408030509722e-11	10.354046680394575	5540	174	132	10877	RPL41,UQCRHL,BCKDHA,GOLGA4,INO80D,GOLGA3,ALMS1,SMG1,HDGFL2,SAFB,KCMF1,RPS14,CCDC88B,SLC38A10,FKBP2,ZNF638,ZNF207,SREK1,ZBTB37,ATP5MG,NUMA1,SNRPG,COX7C,UPF1,RBM6,ZNF37A,NONO,RANBP2,ANKRD12,KRI1,KIF7,KIF3A,UBTF,RSF1,CNIH4,GAK,RIF1,CRTAP,LUC7L,OLA1,CTNNBL1,POLD1,TIMM8B,NDUFC2,YWHAQ,MTX3,PNISR,PTRHD1,TTBK2,CHD2,PEX2,FAM50A,RNF139,PPP2CA,SURF6,EDF1,RRBP1,PSMC5,AXIN1,GRIPAP1,UBXN7,HTATSF1,ARFRP1,MOB1B,…
HPA	tonsil; squamous epithelial cells[≥Low]	HPA:0600221	4.57620968183804e-11	10.339494084394465	6564	174	146	10877	RPL41,UQCRHL,SELENOT,BCKDHA,DMAC1,GOLGA4,INO80D,SAFB2,GOLGA3,SMG1,HDGFL2,SAFB,KCMF1,RPS14,KIAA0232,SLC38A10,ZNF638,ZNF207,SREK1,N4BP2,ZBTB37,ATP5MG,NUMA1,SNRPG,COX7C,UPF1,RBM6,ZNF37A,NONO,NIPBL,RANBP2,ANKRD12,KRI1,KIF7,KIF3A,MMADHC,UBTF,RSF1,GAK,KIAA1109,RIF1,CRTAP,LUC7L,GCC2,OLA1,CTNNBL1,RPL23A,POLD1,TIMM8B,YWHAQ,MTX3,PTRHD1,TTBK2,NASP,CHD2,PEX2,FAM50A,MBD3,SREK1IP1,RNF139,PPP2CA,SURF6,EDF1,RRBP…
HPA	cervix, uterine; glandular cells[≥Low]	HPA:0110051	4.8334740597144294e-11	10.315740607836194	5616	174	133	10877	RPL41,BCKDHA,GOLGA4,INO80D,SAFB2,CNIH1,GOLGA3,ALMS1,SMG1,HDGFL2,SAFB,KCMF1,RPS14,CCDC88B,KIAA0232,SLC38A10,ZNF638,ZNF207,SREK1,N4BP2,LYPLA1,ATP5MG,NUMA1,SNRPG,COX7C,UPF1,RBM6,ZNF37A,NONO,RANBP2,ANKRD12,KRI1,MMADHC,UBTF,RSF1,GAK,KIAA1109,RIF1,CRTAP,LUC7L,GCC2,OLA1,CTNNBL1,RPL23A,POLD1,TIMM8B,NDUFC2,YWHAQ,PNISR,TTBK2,NASP,CHD2,PEX2,FAM50A,MBD3,SREK1IP1,PPP2CA,SURF6,EDF1,RRBP1,PSMC5,AXIN1,GRIPAP1,HT…
HPA	ovary	HPA:0340000	5.289091337486525e-11	10.276618933071036	5348	174	129	10877	RPL41,SELENOT,BCKDHA,DMAC1,GOLGA4,INO80D,SAFB2,CNIH1,GOLGA3,HDGFL2,SAFB,KCMF1,RPS14,CCDC88B,SLC38A10,ZNF638,ZNF207,SREK1,ZBTB37,ATP5MG,NUMA1,SNRPG,COX7C,UPF1,RBM6,ZNF37A,NONO,NIPBL,RANBP2,ANKRD12,KIF7,UBTF,RSF1,RIF1,CRTAP,LUC7L,GCC2,OLA1,CTNNBL1,POLD1,TIMM8B,YWHAQ,MTX3,PNISR,PTRHD1,TTBK2,NASP,CHD2,PEX2,FAM50A,MBD3,RNF139,PPP2CA,SURF6,EDF1,RRBP1,PSMC5,AXIN1,UBXN7,HTATSF1,ARFRP1,MOB1B,RER1,EIF3CL,C…
HPA	seminal vesicle; glandular cells[≥Medium]	HPA:0430052	5.3852866598654385e-11	10.268791174170225	5149	174	126	10877	RPL41,UQCRHL,SELENOT,BCKDHA,DMAC1,GOLGA4,INO80D,SAFB2,CNIH1,GOLGA3,HDGFL2,SAFB,KCMF1,RPS14,CCDC88B,KIAA0232,SLC38A10,FKBP2,ZNF638,ZNF207,SREK1,ZBTB37,ATP5MG,NUMA1,SNRPG,COX7C,UPF1,ZNF37A,NONO,NIPBL,RANBP2,ANKRD12,KRI1,MMADHC,UBTF,RSF1,CNIH4,GAK,KIAA1109,RIF1,CRTAP,LUC7L,GCC2,OLA1,CTNNBL1,POLD1,TIMM8B,NDUFC2,MTX3,PNISR,NASP,CHD2,SREK1IP1,PPP2CA,SURF6,EDF1,RRBP1,PSMC5,AXIN1,GRIPAP1,UBXN7,HTATSF1,AR…
HPA	tonsil; germinal center cells[≥Medium]	HPA:0600432	7.037173846844142e-11	10.152601719998254	4037	174	108	10877	RPL41,BCKDHA,GOLGA4,INO80D,SAFB2,GOLGA3,SMG1,HDGFL2,SAFB,RPS14,CCDC88B,SLC38A10,FKBP2,ZNF638,ZNF207,SREK1,N4BP2,ZBTB37,ATP5MG,NUMA1,SNRPG,COX7C,UPF1,RBM6,ZNF37A,NONO,RANBP2,ANKRD12,UBTF,RSF1,RIF1,LUC7L,OLA1,POLD1,TIMM8B,PNISR,NASP,FAM50A,PPP2CA,SURF6,EDF1,RRBP1,PSMC5,AXIN1,GRIPAP1,UBXN7,HTATSF1,ARFRP1,RER1,EIF3CL,CDK11B,PELP1,ZNF707,GOLGB1,DAPK3,DAZAP1,CCDC9,TELO2,PCBP2,C3ORF38,CCDC12,ARHGEF18,AR…
HPA	hippocampus; neuronal cells[≥Low]	HPA:0250131	7.1708473223167e-11	10.144429524155827	6143	174	140	10877	RPL41,UQCRHL,SELENOT,BCKDHA,GOLGA4,INO80D,SAFB2,CNIH1,GOLGA3,SMG1,HDGFL2,SAFB,KCMF1,RPS14,KIAA0232,SLC38A10,FKBP2,ZNF638,ZNF207,SREK1,ZBTB37,LYPLA1,ATP5MG,NUMA1,SNRPG,COX7C,UPF1,RBM6,ZNF37A,NONO,NIPBL,RANBP2,ANKRD12,KRI1,KIF7,KIF3A,UBTF,RSF1,CNIH4,GAK,RIF1,CRTAP,LUC7L,GCC2,OLA1,CTNNBL1,POLD1,TIMM8B,NDUFC2,YWHAQ,MTX3,PNISR,TTBK2,NASP,CHD2,PEX2,FAM50A,MBD3,RNF139,PPP2CA,SURF6,EDF1,RRBP1,PSMC5,AXIN1…
HPA	bronchus	HPA:0060000	7.872963206565373e-11	10.103861778181118	7334	174	155	10877	RPL41,UQCRHL,SELENOT,BCKDHA,DMAC1,GOLGA4,INO80D,SAFB2,CNIH1,GOLGA3,SMG1,HDGFL2,SAFB,KCMF1,RPS14,CCDC88B,KIAA0232,SLC38A10,FKBP2,ZNF638,ZNF207,SREK1,N4BP2,ZBTB37,LYPLA1,ATP5MG,NUMA1,SNRPG,COX7C,UPF1,RBM6,ZNF37A,NONO,NIPBL,RANBP2,ANKRD12,KRI1,KIF3A,MMADHC,UBTF,RSF1,CNIH4,GAK,KIAA1109,RIF1,CRTAP,LUC7L,GCC2,OLA1,CTNNBL1,POLD1,TIMM8B,NDUFC2,PNISR,PTRHD1,TTBK2,NASP,CHD2,PEX2,FAM50A,MBD3,SREK1IP1,RNF139…
HPA	parathyroid gland; glandular cells[≥Medium]	HPA:0360052	8.046731160720064e-11	10.094380508100926	4348	174	113	10877	UQCRHL,BCKDHA,GOLGA4,INO80D,CNIH1,HDGFL2,SAFB,RPS14,CCDC88B,SLC38A10,ZNF638,ZNF207,SREK1,ZBTB37,NUMA1,SNRPG,COX7C,UPF1,RBM6,ZNF37A,NONO,RANBP2,ANKRD12,KRI1,KIF7,MMADHC,UBTF,RSF1,CNIH4,GAK,RIF1,CRTAP,LUC7L,GCC2,OLA1,CTNNBL1,RPL23A,POLD1,TIMM8B,NDUFC2,YWHAQ,MTX3,PTRHD1,TTBK2,NASP,CHD2,FAM50A,PPP2CA,SURF6,RRBP1,PSMC5,AXIN1,GRIPAP1,HTATSF1,ARFRP1,MOB1B,RER1,EIF3CL,PELP1,GOLGB1,TELO2,MINDY2,PCBP2,INTS…
HPA	caudate; neuronal cells[≥Low]	HPA:0080131	8.715730493578093e-11	10.059696207402546	6084	174	139	10877	RPL41,UQCRHL,SELENOT,BCKDHA,GOLGA4,INO80D,SAFB2,CNIH1,GOLGA3,SMG1,HDGFL2,SAFB,RPS14,KIAA0232,SLC38A10,FKBP2,ZNF638,ZNF207,N4BP2,ZBTB37,LYPLA1,ATP5MG,NUMA1,SNRPG,COX7C,UPF1,RBM6,NONO,NIPBL,RANBP2,ANKRD12,KRI1,KIF7,KIF3A,UBTF,RSF1,CNIH4,GAK,KIAA1109,RIF1,CRTAP,LUC7L,GCC2,OLA1,CTNNBL1,RPL23A,POLD1,TIMM8B,NDUFC2,YWHAQ,MTX3,PNISR,PTRHD1,NASP,CHD2,FAM50A,MBD3,RNF139,PPP2CA,SURF6,EDF1,RRBP1,PSMC5,AXIN1,…
HPA	duodenum; glandular cells[≥Medium]	HPA:0150052	9.286372718381733e-11	10.032153889452093	6537	174	145	10877	RPL41,UQCRHL,SELENOT,BCKDHA,DMAC1,GOLGA4,INO80D,SAFB2,CNIH1,GOLGA3,SMG1,HDGFL2,SAFB,KCMF1,RPS14,KIAA0232,SLC38A10,ZNF638,ZNF207,SREK1,N4BP2,ZBTB37,LYPLA1,ATP5MG,NUMA1,SNRPG,COX7C,UPF1,RBM6,ZNF37A,NONO,NIPBL,RANBP2,ANKRD12,KRI1,KIF7,MMADHC,UBTF,RSF1,CNIH4,GAK,KIAA1109,RIF1,CRTAP,LUC7L,GCC2,OLA1,CTNNBL1,RPL23A,POLD1,TIMM8B,NDUFC2,YWHAQ,MTX3,PNISR,PTRHD1,NASP,CHD2,PEX2,FAM50A,PPP2CA,SURF6,EDF1,RRBP1…
HPA	kidney; cells in tubules[≥Low]	HPA:0270361	1.0870068333796236e-10	9.963767725748356	7710	174	159	10877	RPL41,UQCRHL,SELENOT,BCKDHA,DMAC1,GOLGA4,INO80D,SAFB2,CNIH1,GOLGA3,SMG1,HDGFL2,SAFB,KCMF1,RPS14,CCDC88B,KIAA0232,SLC38A10,FKBP2,ZNF638,ZNF207,SREK1,N4BP2,ZBTB37,LYPLA1,ATP5MG,NUMA1,SNRPG,COX7C,UPF1,RBM6,ZNF37A,NONO,NIPBL,RANBP2,ANKRD12,KRI1,KIF7,MMADHC,UBTF,RSF1,CNIH4,GAK,KIAA1109,RIF1,CRTAP,LUC7L,GCC2,OLA1,CTNNBL1,RPL23A,POLD1,TIMM8B,NDUFC2,YWHAQ,MTX3,PTRHD1,NASP,CHD2,PEX2,FAM50A,MBD3,RNF139,PPP…
HPA	cervix, uterine; squamous epithelial cells[≥Medium]	HPA:0110222	1.2713376201379923e-10	9.895739101616018	3666	174	101	10877	RPL41,UQCRHL,BCKDHA,INO80D,SAFB2,HDGFL2,SAFB,RPS14,KIAA0232,SLC38A10,ZNF638,ZNF207,SREK1,N4BP2,ZBTB37,NUMA1,SNRPG,COX7C,UPF1,RBM6,ZNF37A,NONO,RANBP2,ANKRD12,KRI1,UBTF,RSF1,CNIH4,RIF1,CRTAP,LUC7L,OLA1,CTNNBL1,POLD1,TIMM8B,NDUFC2,PNISR,PTRHD1,CHD2,FAM50A,PPP2CA,SURF6,EDF1,RRBP1,PSMC5,AXIN1,UBXN7,ARFRP1,RER1,EIF3CL,CDK11B,PELP1,ZNF707,GOLGB1,DAPK3,DAZAP1,RPL10A,TELO2,MINDY2,PCBP2,INTS1,CCDC12,PSENEN…
HPA	kidney	HPA:0270000	1.275410762210415e-10	9.894349922656215	8002	174	162	10877	RPL41,UQCRHL,SELENOT,BCKDHA,DMAC1,GOLGA4,INO80D,SAFB2,CNIH1,GOLGA3,SMG1,HDGFL2,SAFB,KCMF1,RPS14,CCDC88B,KIAA0232,SLC38A10,FKBP2,ZNF638,ZNF207,SREK1,N4BP2,ZBTB37,LYPLA1,ATP5MG,NUMA1,SNRPG,COX7C,UPF1,RBM6,ZNF37A,NONO,NIPBL,RANBP2,ANKRD12,KRI1,KIF7,MMADHC,UBTF,RSF1,CNIH4,GAK,KIAA1109,RIF1,CRTAP,LUC7L,GCC2,OLA1,CTNNBL1,RPL23A,POLD1,TIMM8B,NDUFC2,YWHAQ,MTX3,PNISR,PTRHD1,NASP,CHD2,PEX2,FAM50A,MBD3,SREK…
HPA	lymph node; non-germinal center cells[≥Low]	HPA:0310441	1.3271077664496044e-10	9.877093809257588	5969	174	137	10877	RPL41,BCKDHA,DMAC1,GOLGA4,INO80D,SAFB2,CNIH1,GOLGA3,SMG1,HDGFL2,SAFB,KCMF1,RPS14,CCDC88B,SLC38A10,FKBP2,ZNF638,ZNF207,SREK1,N4BP2,ZBTB37,NUMA1,SNRPG,COX7C,UPF1,RBM6,ZNF37A,NONO,RANBP2,ANKRD12,UBTF,RSF1,CNIH4,GAK,RIF1,CRTAP,LUC7L,GCC2,OLA1,CTNNBL1,RPL23A,POLD1,TIMM8B,YWHAQ,MTX3,PNISR,PTRHD1,NASP,CHD2,PEX2,FAM50A,MBD3,SREK1IP1,PPP2CA,SURF6,EDF1,RRBP1,PSMC5,AXIN1,GRIPAP1,UBXN7,HTATSF1,ARFRP1,MOB1B,R…
HPA	pancreas; pancreatic endocrine cells[≥Medium]	HPA:0351182	1.411490700997011e-10	9.850321978671145	3560	174	99	10877	RPL41,UQCRHL,BCKDHA,GOLGA4,INO80D,GOLGA3,SMG1,HDGFL2,SAFB,KCMF1,RPS14,CCDC88B,SLC38A10,ZNF638,ZNF207,SREK1,ZBTB37,ATP5MG,NUMA1,SNRPG,COX7C,UPF1,RBM6,ZNF37A,NONO,RANBP2,ANKRD12,KIF3A,UBTF,RSF1,CNIH4,RIF1,CRTAP,LUC7L,OLA1,POLD1,NDUFC2,YWHAQ,MTX3,TTBK2,CHD2,FAM50A,PPP2CA,SURF6,EDF1,RRBP1,PSMC5,GRIPAP1,UBXN7,HTATSF1,ARFRP1,EIF3CL,CDK11B,PELP1,GOLGB1,DAZAP1,CCDC9,TELO2,MINDY2,C3ORF38,CCDC12,PSENEN,EIF…
HPA	endometrium 1; glandular cells[≥Low]	HPA:0160051	1.411490700997011e-10	9.850321978671145	6722	174	147	10877	RPL41,UQCRHL,SELENOT,BCKDHA,GOLGA4,INO80D,SAFB2,CNIH1,GOLGA3,ALMS1,SMG1,HDGFL2,SAFB,KCMF1,RPS14,CCDC88B,KIAA0232,SLC38A10,ZNF638,ZNF207,SREK1,N4BP2,ZBTB37,LYPLA1,ATP5MG,NUMA1,SNRPG,COX7C,UPF1,RBM6,ZNF37A,NONO,RANBP2,ANKRD12,KRI1,KIF7,MMADHC,RSF1,CNIH4,GAK,RIF1,CRTAP,LUC7L,GCC2,OLA1,CTNNBL1,POLD1,TIMM8B,NDUFC2,YWHAQ,MTX3,PNISR,PTRHD1,TTBK2,NASP,CHD2,PEX2,FAM50A,SREK1IP1,RNF139,PPP2CA,SURF6,EDF1,RR…
HPA	skin 1; melanocytes[≥Low]	HPA:0460671	1.5487607682213432e-10	9.810015661043417	5423	174	129	10877	RPL41,UQCRHL,BCKDHA,GOLGA4,SAFB2,CNIH1,GOLGA3,HDGFL2,SAFB,KCMF1,RPS14,CCDC88B,SLC38A10,FKBP2,ZNF638,ZNF207,SREK1,N4BP2,ZBTB37,ATP5MG,NUMA1,SNRPG,COX7C,UPF1,RBM6,ZNF37A,NONO,NIPBL,RANBP2,ANKRD12,KRI1,KIF7,MMADHC,UBTF,RSF1,CNIH4,GAK,RIF1,CRTAP,LUC7L,GCC2,OLA1,CTNNBL1,RPL23A,POLD1,TIMM8B,NDUFC2,YWHAQ,TTBK2,NASP,CHD2,FAM50A,RNF139,PPP2CA,SURF6,EDF1,RRBP1,PSMC5,AXIN1,UBXN7,HTATSF1,ARFRP1,MOB1B,RER1,EI…
HPA	small intestine	HPA:0480000	1.7238062828589161e-10	9.76351154072269	7653	174	158	10877	RPL41,UQCRHL,SELENOT,BCKDHA,DMAC1,GOLGA4,INO80D,SAFB2,CNIH1,GOLGA3,ALMS1,SMG1,HDGFL2,SAFB,KCMF1,RPS14,KIAA0232,SLC38A10,FKBP2,ZNF638,ZNF207,SREK1,N4BP2,ZBTB37,LYPLA1,ATP5MG,NUMA1,SNRPG,COX7C,UPF1,RBM6,ZNF37A,NONO,NIPBL,RANBP2,ANKRD12,KRI1,KIF7,MMADHC,UBTF,RSF1,CNIH4,GAK,KIAA1109,RIF1,CRTAP,LUC7L,GCC2,OLA1,CTNNBL1,RPL23A,POLD1,TIMM8B,NDUFC2,YWHAQ,MTX3,PNISR,PTRHD1,TTBK2,NASP,CHD2,PEX2,FAM50A,MBD3,…
HPA	small intestine; glandular cells[≥Low]	HPA:0480051	1.7238062828589161e-10	9.76351154072269	7653	174	158	10877	RPL41,UQCRHL,SELENOT,BCKDHA,DMAC1,GOLGA4,INO80D,SAFB2,CNIH1,GOLGA3,ALMS1,SMG1,HDGFL2,SAFB,KCMF1,RPS14,KIAA0232,SLC38A10,FKBP2,ZNF638,ZNF207,SREK1,N4BP2,ZBTB37,LYPLA1,ATP5MG,NUMA1,SNRPG,COX7C,UPF1,RBM6,ZNF37A,NONO,NIPBL,RANBP2,ANKRD12,KRI1,KIF7,MMADHC,UBTF,RSF1,CNIH4,GAK,KIAA1109,RIF1,CRTAP,LUC7L,GCC2,OLA1,CTNNBL1,RPL23A,POLD1,TIMM8B,NDUFC2,YWHAQ,MTX3,PNISR,PTRHD1,TTBK2,NASP,CHD2,PEX2,FAM50A,MBD3,…
HPA	salivary gland; glandular cells[≥Medium]	HPA:0420052	2.170637799833047e-10	9.663412638386696	4789	174	119	10877	RPL41,UQCRHL,SELENOT,BCKDHA,DMAC1,GOLGA4,INO80D,SAFB2,CNIH1,GOLGA3,SMG1,HDGFL2,SAFB,RPS14,CCDC88B,KIAA0232,SLC38A10,FKBP2,ZNF638,ZNF207,SREK1,N4BP2,ZBTB37,LYPLA1,ATP5MG,NUMA1,SNRPG,COX7C,UPF1,RBM6,ZNF37A,NONO,NIPBL,RANBP2,ANKRD12,KIF7,MMADHC,UBTF,RSF1,CNIH4,RIF1,CRTAP,LUC7L,GCC2,OLA1,RPL23A,POLD1,YWHAQ,MTX3,PNISR,FAM50A,SURF6,EDF1,RRBP1,PSMC5,AXIN1,GRIPAP1,UBXN7,HTATSF1,ARFRP1,MOB1B,RER1,EIF3CL,C…
HPA	endometrium 2; glandular cells[≥Medium]	HPA:0170052	2.7889968472245343e-10	9.554551976674704	4805	174	119	10877	RPL41,UQCRHL,BCKDHA,GOLGA4,INO80D,SAFB2,CNIH1,GOLGA3,SMG1,HDGFL2,SAFB,KCMF1,RPS14,CCDC88B,KIAA0232,SLC38A10,ZNF638,ZNF207,SREK1,N4BP2,ZBTB37,NUMA1,SNRPG,COX7C,UPF1,RBM6,ZNF37A,NONO,NIPBL,RANBP2,ANKRD12,KIF7,UBTF,RSF1,CNIH4,RIF1,CRTAP,LUC7L,GCC2,OLA1,POLD1,TIMM8B,NDUFC2,YWHAQ,PNISR,PTRHD1,NASP,CHD2,FAM50A,PPP2CA,SURF6,EDF1,RRBP1,PSMC5,AXIN1,HTATSF1,ARFRP1,RER1,EIF3CL,CDK11B,PELP1,ZNF707,GOLGB1,MAC…
HPA	cerebral cortex; neuronal cells[≥Low]	HPA:0100131	3.240212336156964e-10	9.489426528867565	6624	174	145	10877	RPL41,UQCRHL,SELENOT,BCKDHA,GOLGA4,INO80D,SAFB2,CNIH1,GOLGA3,SMG1,HDGFL2,SAFB,KCMF1,RPS14,KIAA0232,SLC38A10,FKBP2,ZNF638,ZNF207,SREK1,N4BP2,ZBTB37,LYPLA1,ATP5MG,NUMA1,SNRPG,COX7C,UPF1,RBM6,ZNF37A,NONO,NIPBL,RANBP2,ANKRD12,KRI1,KIF7,KIF3A,UBTF,RSF1,CNIH4,GAK,RIF1,CRTAP,LUC7L,GCC2,OLA1,CTNNBL1,POLD1,NDUFC2,YWHAQ,MTX3,PNISR,TTBK2,NASP,CHD2,PEX2,FAM50A,MBD3,RNF139,PPP2CA,SURF6,EDF1,RRBP1,PSMC5,AXIN1,…
HPA	placenta; decidual cells[≥Medium]	HPA:0380512	3.3751515221102053e-10	9.471706725428744	3499	174	97	10877	UQCRHL,BCKDHA,DMAC1,GOLGA4,INO80D,SAFB2,HDGFL2,SAFB,KCMF1,RPS14,CCDC88B,KIAA0232,FKBP2,ZNF638,ZNF207,SREK1,ZBTB37,NUMA1,SNRPG,COX7C,UPF1,RBM6,ZNF37A,NONO,KIF7,UBTF,RSF1,GAK,RIF1,CRTAP,LUC7L,OLA1,CTNNBL1,POLD1,PNISR,CHD2,MBD3,RNF139,RRBP1,PSMC5,AXIN1,UBXN7,ARFRP1,RER1,EIF3CL,PELP1,ZNF707,DAPK3,DAZAP1,CCDC9,RPL10A,INTS1,CCDC12,TBL3,PSENEN,EIF3A,RESF1,RPS3A,SDHAF4,UBE2D2,HNRNPLL,CFAP410,KIF5B,SMG6,H…
HPA	tonsil; squamous epithelial cells[≥Medium]	HPA:0600222	3.6300092328763555e-10	9.440092270340704	4887	174	120	10877	RPL41,UQCRHL,SELENOT,BCKDHA,DMAC1,GOLGA4,INO80D,SAFB2,HDGFL2,SAFB,KCMF1,RPS14,SLC38A10,ZNF638,ZNF207,SREK1,N4BP2,ZBTB37,ATP5MG,NUMA1,SNRPG,COX7C,UPF1,RBM6,ZNF37A,NONO,NIPBL,RANBP2,ANKRD12,KRI1,MMADHC,UBTF,RSF1,KIAA1109,RIF1,CRTAP,LUC7L,GCC2,OLA1,CTNNBL1,POLD1,TIMM8B,YWHAQ,PTRHD1,NASP,CHD2,FAM50A,SREK1IP1,PPP2CA,SURF6,EDF1,RRBP1,PSMC5,AXIN1,GRIPAP1,UBXN7,HTATSF1,ARFRP1,RER1,EIF3CL,CDK11B,PELP1,ZNF…
HPA	endometrium 2; cells in endometrial stroma[≥Low]	HPA:0170251	3.910492461561156e-10	9.407768546984927	3452	174	96	10877	RPL41,BCKDHA,GOLGA4,INO80D,SAFB2,CNIH1,GOLGA3,HDGFL2,SAFB,RPS14,CCDC88B,KIAA0232,ZNF638,ZNF207,SREK1,ZBTB37,ATP5MG,NUMA1,SNRPG,COX7C,UPF1,RBM6,ZNF37A,NONO,RANBP2,ANKRD12,KRI1,MMADHC,UBTF,RSF1,RIF1,CRTAP,LUC7L,OLA1,POLD1,MTX3,PNISR,NASP,CHD2,PEX2,FAM50A,RNF139,PPP2CA,SURF6,EDF1,RRBP1,HTATSF1,ARFRP1,MOB1B,EIF3CL,CDK11B,PELP1,ZNF707,GOLGB1,DAPK3,DAZAP1,CCDC9,PCBP2,INTS1,CCDC12,PSENEN,EIF3A,RPS3A,SDH…
HPA	endometrium 1	HPA:0160000	4.0804949520512634e-10	9.389287155070061	6954	174	149	10877	RPL41,UQCRHL,SELENOT,BCKDHA,DMAC1,GOLGA4,INO80D,SAFB2,CNIH1,GOLGA3,ALMS1,SMG1,HDGFL2,SAFB,KCMF1,RPS14,CCDC88B,KIAA0232,SLC38A10,ZNF638,ZNF207,SREK1,N4BP2,ZBTB37,LYPLA1,ATP5MG,NUMA1,SNRPG,COX7C,UPF1,RBM6,ZNF37A,NONO,RANBP2,ANKRD12,KRI1,KIF7,MMADHC,UBTF,RSF1,CNIH4,GAK,RIF1,CRTAP,LUC7L,GCC2,OLA1,CTNNBL1,POLD1,TIMM8B,NDUFC2,YWHAQ,MTX3,PNISR,PTRHD1,TTBK2,NASP,CHD2,PEX2,FAM50A,SREK1IP1,RNF139,PPP2CA,SU…
HPA	colon; endothelial cells[≥Low]	HPA:0130201	4.999165000102281e-10	9.301102528890267	5709	174	132	10877	SELENOT,BCKDHA,DMAC1,GOLGA4,INO80D,SAFB2,CNIH1,GOLGA3,SMG1,HDGFL2,SAFB,KCMF1,RPS14,CCDC88B,KIAA0232,SLC38A10,ZNF638,ZNF207,SREK1,N4BP2,ZBTB37,NUMA1,SNRPG,COX7C,UPF1,RBM6,ZNF37A,NONO,NIPBL,RANBP2,ANKRD12,KRI1,KIF7,MMADHC,UBTF,RSF1,RIF1,CRTAP,LUC7L,GCC2,OLA1,CTNNBL1,RPL23A,POLD1,TIMM8B,YWHAQ,MTX3,PNISR,CHD2,PEX2,FAM50A,MBD3,RNF139,PPP2CA,SURF6,EDF1,RRBP1,PSMC5,AXIN1,GRIPAP1,UBXN7,HTATSF1,ARFRP1,MOB…
HPA	endometrium 2	HPA:0170000	5.279354393899544e-10	9.27741918358552	6814	174	147	10877	RPL41,UQCRHL,SELENOT,BCKDHA,GOLGA4,INO80D,SAFB2,CNIH1,GOLGA3,SMG1,HDGFL2,SAFB,KCMF1,RPS14,CCDC88B,KIAA0232,SLC38A10,ZNF638,ZNF207,SREK1,N4BP2,ZBTB37,LYPLA1,ATP5MG,NUMA1,SNRPG,COX7C,UPF1,RBM6,ZNF37A,NONO,NIPBL,RANBP2,ANKRD12,KRI1,KIF7,MMADHC,UBTF,RSF1,CNIH4,GAK,KIAA1109,RIF1,CRTAP,LUC7L,GCC2,OLA1,POLD1,TIMM8B,NDUFC2,YWHAQ,MTX3,PNISR,PTRHD1,NASP,CHD2,PEX2,FAM50A,SREK1IP1,RNF139,CEP131,PPP2CA,SURF6,…
HPA	cerebral cortex	HPA:0100000	5.387387510823395e-10	9.268621784847676	8005	174	161	10877	RPL41,UQCRHL,SELENOT,BCKDHA,DMAC1,GOLGA4,INO80D,SAFB2,CNIH1,GOLGA3,SMG1,HDGFL2,SAFB,KCMF1,RPS14,CCDC88B,KIAA0232,SLC38A10,FKBP2,ZNF638,ZNF207,SREK1,N4BP2,ZBTB37,LYPLA1,ATP5MG,NUMA1,SNRPG,COX7C,UPF1,RBM6,ZNF37A,NONO,NIPBL,RANBP2,ANKRD12,KRI1,KIF7,KIF3A,MMADHC,UBTF,RSF1,CNIH4,GAK,RIF1,CRTAP,LUC7L,GCC2,OLA1,CTNNBL1,POLD1,TIMM8B,NDUFC2,YWHAQ,MTX3,PNISR,TTBK2,NASP,CHD2,PEX2,FAM50A,MBD3,SREK1IP1,RNF139…
HPA	skin 2; epidermal cells[≥Low]	HPA:0470681	5.802716780762375e-10	9.236368625981003	6667	174	145	10877	RPL41,UQCRHL,BCKDHA,DMAC1,GOLGA4,INO80D,SAFB2,CNIH1,GOLGA3,SMG1,HDGFL2,SAFB,KCMF1,RPS14,CCDC88B,KIAA0232,SLC38A10,ZNF638,ZNF207,SREK1,N4BP2,ZBTB37,ATP5MG,NUMA1,SNRPG,COX7C,UPF1,RBM6,NONO,NIPBL,RANBP2,ANKRD12,KRI1,KIF7,KIF3A,MMADHC,UBTF,RSF1,CNIH4,GAK,KIAA1109,RIF1,CRTAP,LUC7L,GCC2,OLA1,CTNNBL1,RPL23A,POLD1,TIMM8B,NDUFC2,YWHAQ,MTX3,PNISR,PTRHD1,TTBK2,NASP,CHD2,PEX2,FAM50A,MBD3,RNF139,PPP2CA,SURF6,…
HPA	skin 2	HPA:0470000	5.802716780762375e-10	9.236368625981003	6667	174	145	10877	RPL41,UQCRHL,BCKDHA,DMAC1,GOLGA4,INO80D,SAFB2,CNIH1,GOLGA3,SMG1,HDGFL2,SAFB,KCMF1,RPS14,CCDC88B,KIAA0232,SLC38A10,ZNF638,ZNF207,SREK1,N4BP2,ZBTB37,ATP5MG,NUMA1,SNRPG,COX7C,UPF1,RBM6,NONO,NIPBL,RANBP2,ANKRD12,KRI1,KIF7,KIF3A,MMADHC,UBTF,RSF1,CNIH4,GAK,KIAA1109,RIF1,CRTAP,LUC7L,GCC2,OLA1,CTNNBL1,RPL23A,POLD1,TIMM8B,NDUFC2,YWHAQ,MTX3,PNISR,PTRHD1,TTBK2,NASP,CHD2,PEX2,FAM50A,MBD3,RNF139,PPP2CA,SURF6,…
HPA	cerebral cortex; neuronal cells[≥Medium]	HPA:0100132	5.968560821753816e-10	9.22413037616042	4923	174	120	10877	RPL41,UQCRHL,SELENOT,BCKDHA,GOLGA4,INO80D,SAFB2,CNIH1,GOLGA3,SMG1,HDGFL2,SAFB,KCMF1,RPS14,KIAA0232,SLC38A10,FKBP2,ZNF638,ZNF207,SREK1,N4BP2,ATP5MG,NUMA1,SNRPG,COX7C,UPF1,RBM6,ZNF37A,NONO,RANBP2,ANKRD12,KRI1,KIF7,KIF3A,UBTF,RSF1,CNIH4,RIF1,LUC7L,GCC2,OLA1,CTNNBL1,POLD1,NDUFC2,YWHAQ,MTX3,PNISR,CHD2,PEX2,FAM50A,MBD3,PPP2CA,SURF6,EDF1,RRBP1,PSMC5,AXIN1,GRIPAP1,UBXN7,HTATSF1,ARFRP1,MOB1B,RER1,EIF3CL,C…
HPA	lymph node; germinal center cells[≥Medium]	HPA:0310432	5.968560821753816e-10	9.22413037616042	3257	174	92	10877	BCKDHA,INO80D,SAFB2,CNIH1,HDGFL2,SAFB,RPS14,CCDC88B,FKBP2,ZNF207,N4BP2,ZBTB37,NUMA1,SNRPG,COX7C,UPF1,RBM6,ZNF37A,NONO,RANBP2,ANKRD12,UBTF,CNIH4,RIF1,GCC2,OLA1,POLD1,TIMM8B,YWHAQ,PTRHD1,NASP,FAM50A,PPP2CA,SURF6,EDF1,PSMC5,AXIN1,GRIPAP1,UBXN7,HTATSF1,ARFRP1,RER1,EIF3CL,CDK11B,ZNF707,GOLGB1,DAPK3,DAZAP1,TELO2,PCBP2,INTS1,C3ORF38,ARHGEF18,ARHGAP4,PSENEN,EIF3A,TAF10,HNRNPLL,KIF5B,SUGP2,CFL2,SSR3,SRPRB…
HPA	skin 1; keratinocytes[≥Medium]	HPA:0460662	6.153076177819101e-10	9.210907708119889	3942	174	104	10877	RPL41,UQCRHL,BCKDHA,GOLGA4,INO80D,SAFB2,CNIH1,GOLGA3,HDGFL2,SAFB,KCMF1,RPS14,CCDC88B,ZNF638,ZNF207,SREK1,ZBTB37,NUMA1,SNRPG,COX7C,UPF1,RBM6,ZNF37A,NONO,NIPBL,RANBP2,ANKRD12,KRI1,KIF7,UBTF,RSF1,RIF1,CRTAP,LUC7L,GCC2,OLA1,CTNNBL1,POLD1,TIMM8B,NDUFC2,PNISR,FAM50A,PPP2CA,SURF6,RRBP1,PSMC5,AXIN1,UBXN7,HTATSF1,ARFRP1,RER1,EIF3CL,CDK11B,PELP1,ZNF707,GOLGB1,DAPK3,DAZAP1,CCDC9,RPL10A,PCBP2,INTS1,CCDC12,EI…
HPA	breast; myoepithelial cells[≥Medium]	HPA:0050092	9.612532235243997e-10	9.017162190798823	3736	174	100	10877	UQCRHL,BCKDHA,INO80D,SAFB2,CNIH1,HDGFL2,SAFB,KCMF1,CCDC88B,KIAA0232,SLC38A10,ZNF638,ZNF207,SREK1,N4BP2,ZBTB37,ATP5MG,NUMA1,SNRPG,COX7C,UPF1,RBM6,ZNF37A,NONO,NIPBL,RANBP2,ANKRD12,MMADHC,UBTF,RSF1,RIF1,CRTAP,LUC7L,OLA1,POLD1,TIMM8B,NDUFC2,YWHAQ,MTX3,PNISR,TTBK2,FAM50A,MBD3,SREK1IP1,PPP2CA,SURF6,AXIN1,GRIPAP1,UBXN7,HTATSF1,ARFRP1,RER1,EIF3CL,CDK11B,PELP1,ZNF707,GOLGB1,DAPK3,DAZAP1,CCDC9,RPL10A,TELO2…
HPA	testis	HPA:0570000	1.4558600674516903e-9	8.836880365994189	8899	174	169	10877	RPL41,UQCRHL,SELENOT,BCKDHA,DMAC1,GOLGA4,INO80D,SAFB2,CNIH1,GOLGA3,ALMS1,SMG1,HDGFL2,SAFB,KCMF1,RPS14,CCDC88B,KIAA0232,SLC38A10,FKBP2,ZNF638,ZNF207,SREK1,N4BP2,ZBTB37,LYPLA1,ATP5MG,NUMA1,SNRPG,COX7C,UPF1,RBM6,ZNF37A,NONO,NIPBL,RANBP2,ANKRD12,KRI1,KIF7,KIF3A,MMADHC,UBTF,RSF1,CNIH4,GAK,KIAA1109,RIF1,CRTAP,LUC7L,GCC2,OLA1,CTNNBL1,RPL23A,POLD1,TIMM8B,NDUFC2,YWHAQ,MTX3,PNISR,PTRHD1,TTBK2,NASP,CHD2,PEX…
HPA	prostate; glandular cells[≥Medium]	HPA:0390052	1.5164094938532854e-9	8.819183505230049	4730	174	116	10877	RPL41,BCKDHA,GOLGA4,INO80D,SAFB2,CNIH1,GOLGA3,HDGFL2,SAFB,KCMF1,RPS14,CCDC88B,KIAA0232,SLC38A10,ZNF638,ZNF207,SREK1,ZBTB37,NUMA1,SNRPG,COX7C,UPF1,RBM6,ZNF37A,NONO,RANBP2,ANKRD12,KRI1,KIF7,MMADHC,UBTF,CNIH4,GAK,RIF1,CRTAP,LUC7L,GCC2,OLA1,CTNNBL1,POLD1,TIMM8B,NDUFC2,YWHAQ,MTX3,PNISR,CHD2,FAM50A,SREK1IP1,SURF6,EDF1,RRBP1,PSMC5,AXIN1,GRIPAP1,UBXN7,HTATSF1,ARFRP1,MOB1B,RER1,EIF3CL,CDK11B,PELP1,ZNF707,…
HPA	small intestine; glandular cells[≥Medium]	HPA:0480052	1.7225297556259769e-9	8.763833267189538	6516	174	142	10877	RPL41,UQCRHL,SELENOT,BCKDHA,DMAC1,GOLGA4,INO80D,SAFB2,CNIH1,GOLGA3,SMG1,HDGFL2,SAFB,KCMF1,RPS14,KIAA0232,SLC38A10,FKBP2,ZNF638,ZNF207,SREK1,N4BP2,ZBTB37,LYPLA1,ATP5MG,NUMA1,SNRPG,COX7C,UPF1,RBM6,ZNF37A,NONO,NIPBL,RANBP2,ANKRD12,KRI1,KIF7,MMADHC,UBTF,CNIH4,GAK,KIAA1109,RIF1,CRTAP,LUC7L,GCC2,OLA1,CTNNBL1,RPL23A,POLD1,TIMM8B,NDUFC2,MTX3,PNISR,PTRHD1,NASP,CHD2,FAM50A,PPP2CA,SURF6,EDF1,RRBP1,PSMC5,AXI…
HPA	kidney; cells in tubules[≥Medium]	HPA:0270362	1.8472367711866849e-9	8.733477434917361	6373	174	140	10877	RPL41,UQCRHL,BCKDHA,GOLGA4,INO80D,SAFB2,CNIH1,GOLGA3,SMG1,HDGFL2,SAFB,KCMF1,RPS14,KIAA0232,SLC38A10,FKBP2,ZNF638,ZNF207,SREK1,N4BP2,ZBTB37,LYPLA1,ATP5MG,NUMA1,SNRPG,COX7C,UPF1,RBM6,ZNF37A,NONO,NIPBL,RANBP2,ANKRD12,KRI1,KIF7,MMADHC,UBTF,RSF1,CNIH4,GAK,RIF1,CRTAP,LUC7L,GCC2,OLA1,CTNNBL1,RPL23A,POLD1,TIMM8B,NDUFC2,MTX3,PTRHD1,CHD2,PEX2,FAM50A,PPP2CA,SURF6,EDF1,RRBP1,PSMC5,AXIN1,GRIPAP1,UBXN7,HTATSF1…
HPA	placenta; trophoblastic cells[High]	HPA:0380523	1.8509441619468198e-9	8.732606682556742	2030	174	67	10877	BCKDHA,GOLGA4,SAFB2,SAFB,KCMF1,RPS14,CCDC88B,KIAA0232,FKBP2,ZNF207,ZBTB37,NUMA1,RBM6,ZNF37A,NIPBL,ANKRD12,KIF7,UBTF,RSF1,CNIH4,CRTAP,LUC7L,GCC2,POLD1,PNISR,FAM50A,MBD3,SREK1IP1,RRBP1,PSMC5,GRIPAP1,UBXN7,ARFRP1,RER1,CDK11B,PELP1,ZNF707,GOLGB1,DAZAP1,MINDY2,CCDC12,ARHGEF18,TAF10,SDHAF4,HNRNPLL,CFAP410,SMG6,SSR3,SNRNP70,AKAP13,UBXN1,CANX,EWSR1,RBM15,SSB,NXF1,LUC7L3,PTPN11,PAF1,LNPEP,THRAP3,SMAD4,TUL…
HPA	lung; alveolar cells[≥Low]	HPA:0301171	2.2288253948826015e-9	8.651923952609563	5077	174	121	10877	RPL41,UQCRHL,BCKDHA,GOLGA4,INO80D,SAFB2,GOLGA3,HDGFL2,SAFB,RPS14,CCDC88B,KIAA0232,SLC38A10,FKBP2,ZNF638,ZNF207,SREK1,N4BP2,ZBTB37,ATP5MG,NUMA1,SNRPG,UPF1,RBM6,ZNF37A,NONO,NIPBL,RANBP2,ANKRD12,KRI1,KIF7,UBTF,RSF1,RIF1,CRTAP,LUC7L,GCC2,RPL23A,POLD1,TIMM8B,YWHAQ,MTX3,PNISR,PTRHD1,CHD2,FAM50A,MBD3,SREK1IP1,PPP2CA,SURF6,EDF1,RRBP1,PSMC5,AXIN1,UBXN7,HTATSF1,ARFRP1,MOB1B,RER1,EIF3CL,CDK11B,PELP1,ZNF707,…
HPA	kidney; cells in glomeruli[≥Low]	HPA:0270351	2.4591052041806795e-9	8.609222891099511	5084	174	121	10877	BCKDHA,DMAC1,GOLGA4,INO80D,SAFB2,CNIH1,GOLGA3,HDGFL2,SAFB,KCMF1,RPS14,CCDC88B,KIAA0232,SLC38A10,ZNF638,ZNF207,SREK1,ZBTB37,ATP5MG,NUMA1,SNRPG,COX7C,RBM6,ZNF37A,NONO,NIPBL,RANBP2,ANKRD12,KRI1,KIF7,UBTF,RSF1,RIF1,CRTAP,LUC7L,GCC2,OLA1,CTNNBL1,RPL23A,POLD1,TIMM8B,YWHAQ,MTX3,PNISR,PTRHD1,NASP,CHD2,PEX2,FAM50A,SREK1IP1,RNF139,PPP2CA,SURF6,EDF1,RRBP1,PSMC5,AXIN1,GRIPAP1,UBXN7,HTATSF1,ARFRP1,MOB1B,RER1,…
HPA	lung; macrophages[≥Medium]	HPA:0300412	2.5249535217364626e-9	8.597746611778652	4766	174	116	10877	RPL41,BCKDHA,DMAC1,GOLGA4,INO80D,SAFB2,CNIH1,HDGFL2,SAFB,KCMF1,RPS14,CCDC88B,KIAA0232,SLC38A10,ZNF207,SREK1,N4BP2,ZBTB37,LYPLA1,NUMA1,COX7C,UPF1,RBM6,ZNF37A,NONO,ANKRD12,MMADHC,UBTF,RSF1,CNIH4,KIAA1109,RIF1,CRTAP,LUC7L,GCC2,OLA1,POLD1,TIMM8B,PNISR,TTBK2,CHD2,PEX2,FAM50A,SREK1IP1,RNF139,EDF1,RRBP1,AXIN1,UBXN7,HTATSF1,ARFRP1,MOB1B,RER1,EIF3CL,CDK11B,PELP1,ZNF707,GOLGB1,DAPK3,MACF1,DAZAP1,RPL10A,TEL…
HPA	appendix; lymphoid tissue[≥Medium]	HPA:0030072	2.61261354160076e-9	8.582924826462069	3180	174	89	10877	RPL41,INO80D,SAFB2,HDGFL2,SAFB,RPS14,CCDC88B,SLC38A10,ZNF638,ZNF207,SREK1,N4BP2,ZBTB37,NUMA1,SNRPG,COX7C,UPF1,RBM6,ZNF37A,NONO,RANBP2,CNIH4,KIAA1109,RIF1,LUC7L,OLA1,POLD1,TIMM8B,MTX3,TTBK2,FAM50A,PPP2CA,SURF6,RRBP1,PSMC5,AXIN1,GRIPAP1,UBXN7,HTATSF1,RER1,EIF3CL,CDK11B,PELP1,ZNF707,GOLGB1,DAPK3,DAZAP1,TELO2,PCBP2,C3ORF38,CCDC12,ARHGEF18,ARHGAP4,EIF3A,RPS3A,SDHAF4,HNRNPLL,CFAP410,KIF5B,SUGP2,CFL2,SS…
HPA	hippocampus; neuronal cells[≥Medium]	HPA:0250132	2.9555203893325616e-9	8.529366040225066	4162	174	106	10877	RPL41,UQCRHL,SELENOT,BCKDHA,GOLGA4,INO80D,SAFB2,CNIH1,GOLGA3,SMG1,HDGFL2,SAFB,RPS14,KIAA0232,SLC38A10,FKBP2,ZNF207,SREK1,ATP5MG,NUMA1,SNRPG,COX7C,UPF1,ZNF37A,NONO,NIPBL,RANBP2,ANKRD12,KRI1,KIF7,KIF3A,UBTF,RSF1,CNIH4,GAK,RIF1,LUC7L,GCC2,OLA1,POLD1,NDUFC2,YWHAQ,MTX3,PNISR,CHD2,FAM50A,PPP2CA,SURF6,EDF1,RRBP1,PSMC5,AXIN1,GRIPAP1,UBXN7,HTATSF1,ARFRP1,MOB1B,RER1,EIF3CL,CDK11B,PELP1,GOLGB1,DAZAP1,RPL10A…
HPA	bronchus; respiratory epithelial cells[≥Medium]	HPA:0060102	3.2364384843483974e-9	8.4899326432921	5235	174	123	10877	RPL41,UQCRHL,SELENOT,BCKDHA,DMAC1,GOLGA4,INO80D,SAFB2,CNIH1,SMG1,HDGFL2,SAFB,KCMF1,RPS14,KIAA0232,SLC38A10,ZNF638,ZNF207,SREK1,ZBTB37,LYPLA1,ATP5MG,NUMA1,SNRPG,COX7C,UPF1,ZNF37A,NONO,NIPBL,RANBP2,ANKRD12,KRI1,MMADHC,UBTF,RSF1,CNIH4,RIF1,CRTAP,LUC7L,GCC2,OLA1,CTNNBL1,POLD1,TIMM8B,NDUFC2,PNISR,PEX2,FAM50A,PPP2CA,SURF6,EDF1,RRBP1,PSMC5,AXIN1,GRIPAP1,UBXN7,HTATSF1,ARFRP1,MOB1B,RER1,EIF3CL,CDK11B,PELP…
HPA	cerebral cortex; glial cells[≥Low]	HPA:0100121	3.730880334850755e-9	8.428188680400991	4857	174	117	10877	UQCRHL,SELENOT,BCKDHA,DMAC1,GOLGA4,INO80D,SAFB2,CNIH1,GOLGA3,HDGFL2,SAFB,RPS14,KIAA0232,SLC38A10,ZNF638,ZNF207,SREK1,ZBTB37,ATP5MG,NUMA1,SNRPG,COX7C,UPF1,RBM6,ZNF37A,NONO,RANBP2,ANKRD12,KRI1,KIF3A,MMADHC,UBTF,RSF1,RIF1,CRTAP,LUC7L,GCC2,OLA1,POLD1,NDUFC2,YWHAQ,PNISR,TTBK2,NASP,CHD2,PEX2,FAM50A,MBD3,PPP2CA,SURF6,EDF1,RRBP1,PSMC5,AXIN1,GRIPAP1,UBXN7,HTATSF1,ARFRP1,RER1,EIF3CL,CDK11B,PELP1,GOLGB1,DAP…
HPA	soft tissue 2	HPA:0510000	4.823266502442107e-9	8.316658741117216	5132	174	121	10877	BCKDHA,DMAC1,GOLGA4,INO80D,GOLGA3,SMG1,HDGFL2,SAFB,RPS14,CCDC88B,KIAA0232,SLC38A10,ZNF638,ZNF207,SREK1,N4BP2,ZBTB37,ATP5MG,NUMA1,SNRPG,COX7C,RBM6,ZNF37A,NONO,NIPBL,RANBP2,ANKRD12,KIF7,KIF3A,MMADHC,UBTF,RSF1,RIF1,CRTAP,LUC7L,GCC2,OLA1,CTNNBL1,POLD1,TIMM8B,MTX3,PNISR,TTBK2,NASP,CHD2,FAM50A,SREK1IP1,RNF139,PPP2CA,SURF6,EDF1,RRBP1,PSMC5,AXIN1,UBXN7,HTATSF1,ARFRP1,MOB1B,RER1,EIF3CL,PELP1,GOLGB1,DAPK3,…
HPA	skeletal muscle; myocytes[≥Medium]	HPA:0440342	4.9596586615765074e-9	8.304548211916027	3726	174	98	10877	UQCRHL,SELENOT,BCKDHA,DMAC1,GOLGA4,INO80D,SAFB2,SMG1,HDGFL2,SAFB,KIAA0232,SLC38A10,ZNF638,ZNF207,SREK1,N4BP2,ZBTB37,NUMA1,SNRPG,COX7C,UPF1,RBM6,NONO,RANBP2,ANKRD12,KRI1,KIF7,MMADHC,UBTF,GAK,CRTAP,LUC7L,GCC2,OLA1,CTNNBL1,POLD1,NDUFC2,PNISR,PEX2,FAM50A,RNF139,PPP2CA,SURF6,PSMC5,AXIN1,HTATSF1,ARFRP1,CDK11B,PELP1,ZNF707,DAPK3,MACF1,RPL10A,TELO2,MINDY2,PCBP2,C3ORF38,CCDC12,ARHGEF18,PSENEN,EIF3A,TAF10,…
HPA	endometrium 1; cells in endometrial stroma[≥Medium]	HPA:0160252	5.015828967366977e-9	8.299657280748937	2178	174	69	10877	BCKDHA,GOLGA4,INO80D,SAFB2,HDGFL2,SAFB,RPS14,CCDC88B,KIAA0232,ZNF638,ZNF207,SREK1,ZBTB37,NUMA1,SNRPG,COX7C,RBM6,ZNF37A,NONO,ANKRD12,UBTF,RSF1,RIF1,CRTAP,LUC7L,POLD1,PNISR,NASP,FAM50A,SURF6,EDF1,RRBP1,PSMC5,HTATSF1,ARFRP1,RER1,PELP1,ZNF707,GOLGB1,DAPK3,DAZAP1,CCDC9,TELO2,PCBP2,CCDC12,EIF3A,TAF10,HNRNPLL,CFAP410,KIF5B,SNRNP70,AKAP13,CANX,EWSR1,SSB,DOHH,NCK1,NXF1,LUC7L3,PTPN11,HDAC4,PAF1,THRAP3,PPT1…
HPA	stomach 2; glandular cells[High]	HPA:0550053	5.0826572501663905e-9	8.293909176030192	2378	174	73	10877	RPL41,UQCRHL,BCKDHA,GOLGA4,INO80D,SAFB2,CNIH1,GOLGA3,SMG1,HDGFL2,SAFB,RPS14,KIAA0232,FKBP2,ZNF207,ZBTB37,LYPLA1,ATP5MG,NUMA1,COX7C,RBM6,NONO,NIPBL,RANBP2,KIF7,KIF3A,UBTF,CNIH4,GAK,CRTAP,LUC7L,GCC2,OLA1,POLD1,FAM50A,RRBP1,AXIN1,HTATSF1,ARFRP1,MOB1B,RER1,EIF3CL,CDK11B,PELP1,ZNF707,GOLGB1,DAZAP1,RPL10A,CCDC12,TAF10,SDHAF4,TBCD,KIF5B,SSR3,SNRNP70,AKAP13,CANX,SLC25A5,EWSR1,RBM15,SSB,NXF1,LUC7L3,PTPN11…
HPA	breast; myoepithelial cells[≥Low]	HPA:0050091	5.431160197942223e-9	8.265107387033142	5607	174	128	10877	UQCRHL,SELENOT,BCKDHA,GOLGA4,INO80D,SAFB2,CNIH1,GOLGA3,HDGFL2,SAFB,KCMF1,CCDC88B,KIAA0232,SLC38A10,ZNF638,ZNF207,SREK1,N4BP2,ZBTB37,ATP5MG,NUMA1,SNRPG,COX7C,UPF1,RBM6,ZNF37A,NONO,NIPBL,RANBP2,ANKRD12,KRI1,MMADHC,UBTF,RSF1,RIF1,CRTAP,LUC7L,OLA1,CTNNBL1,RPL23A,POLD1,TIMM8B,NDUFC2,YWHAQ,MTX3,PNISR,TTBK2,NASP,CHD2,FAM50A,MBD3,SREK1IP1,RNF139,PPP2CA,SURF6,RRBP1,PSMC5,AXIN1,GRIPAP1,UBXN7,HTATSF1,ARFRP1…
HPA	liver; hepatocytes[≥Medium]	HPA:0290402	6.10183956472947e-9	8.214539215420043	3683	174	97	10877	RPL41,UQCRHL,BCKDHA,GOLGA4,INO80D,SAFB2,CNIH1,GOLGA3,SMG1,HDGFL2,SAFB,RPS14,SLC38A10,ZNF638,ZNF207,SREK1,N4BP2,ZBTB37,LYPLA1,ATP5MG,SNRPG,COX7C,NONO,ANKRD12,KRI1,KIF7,MMADHC,UBTF,CNIH4,RIF1,CRTAP,LUC7L,OLA1,TIMM8B,NDUFC2,MTX3,CHD2,PEX2,SURF6,EDF1,RRBP1,PSMC5,AXIN1,UBXN7,HTATSF1,ARFRP1,RER1,CDK11B,ZNF707,DAZAP1,RPL10A,TELO2,PCBP2,INTS1,TBL3,PSENEN,EIF3A,TAF10,RESF1,RPS3A,SDHAF4,TBCD,HNRNPLL,CFAP41…
HPA	gallbladder; glandular cells[High]	HPA:0220053	7.2291313646314315e-9	8.140913883370862	2811	174	81	10877	UQCRHL,BCKDHA,DMAC1,GOLGA4,INO80D,SAFB2,GOLGA3,SMG1,HDGFL2,SAFB,KCMF1,RPS14,CCDC88B,KIAA0232,SLC38A10,ZNF638,ZNF207,SREK1,ZBTB37,LYPLA1,NUMA1,SNRPG,COX7C,RBM6,NONO,RANBP2,ANKRD12,UBTF,CNIH4,GAK,RIF1,CRTAP,LUC7L,GCC2,OLA1,FAM50A,MBD3,RRBP1,PSMC5,AXIN1,GRIPAP1,HTATSF1,ARFRP1,MOB1B,RER1,EIF3CL,CDK11B,PELP1,ZNF707,GOLGB1,DAPK3,DAZAP1,CCDC12,TAF10,SDHAF4,HNRNPLL,CFAP410,KIF5B,SCAPER,SSR3,SNRNP70,AKAP1…
HPA	tonsil; squamous epithelial cells[High]	HPA:0600223	7.72914256013579e-9	8.111868682285564	1452	174	53	10877	RPL41,GOLGA4,INO80D,SAFB2,HDGFL2,SAFB,KCMF1,ZNF638,ZNF207,SREK1,NUMA1,COX7C,RBM6,ZNF37A,ANKRD12,UBTF,LUC7L,OLA1,POLD1,NASP,FAM50A,SREK1IP1,RRBP1,PSMC5,AXIN1,HTATSF1,RER1,EIF3CL,CDK11B,PELP1,ZNF707,GOLGB1,DAZAP1,RPL10A,CCDC12,TAF10,RPS3A,SMG6,HELZ,SNRNP70,AKAP13,EWSR1,RBM15,SSB,DOHH,NCK1,NXF1,LUC7L3,PTPN11,HDAC4,THRAP3,NSMCE2,RPA3
HPA	bone marrow; hematopoietic cells[≥Medium]	HPA:0040082	9.07355673300494e-9	8.042222440973921	4179	174	105	10877	RPL41,BCKDHA,GOLGA4,INO80D,SAFB2,CNIH1,GOLGA3,SMG1,SAFB,KCMF1,RPS14,CCDC88B,KIAA0232,SLC38A10,ZNF638,ZNF207,SREK1,N4BP2,NUMA1,SNRPG,COX7C,RBM6,NONO,NIPBL,RANBP2,ANKRD12,KRI1,KIF3A,UBTF,RSF1,RIF1,CRTAP,LUC7L,GCC2,OLA1,CTNNBL1,POLD1,TIMM8B,PTRHD1,NASP,CHD2,FAM50A,MBD3,SREK1IP1,SURF6,EDF1,RRBP1,PSMC5,AXIN1,GRIPAP1,UBXN7,HTATSF1,ARFRP1,RER1,CDK11B,PELP1,ZNF707,GOLGB1,DAPK3,DAZAP1,CCDC9,TELO2,PCBP2,IN…
HPA	bronchus; respiratory epithelial cells[≥Low]	HPA:0060101	1.0238238955714633e-8	7.9897747384371485	6282	174	137	10877	RPL41,UQCRHL,SELENOT,BCKDHA,DMAC1,GOLGA4,INO80D,SAFB2,CNIH1,SMG1,HDGFL2,SAFB,KCMF1,RPS14,KIAA0232,SLC38A10,FKBP2,ZNF638,ZNF207,SREK1,N4BP2,ZBTB37,LYPLA1,ATP5MG,NUMA1,SNRPG,COX7C,UPF1,ZNF37A,NONO,NIPBL,RANBP2,ANKRD12,KRI1,MMADHC,UBTF,RSF1,CNIH4,GAK,KIAA1109,RIF1,CRTAP,LUC7L,GCC2,OLA1,CTNNBL1,POLD1,TIMM8B,NDUFC2,PNISR,NASP,PEX2,FAM50A,MBD3,RNF139,PPP2CA,SURF6,EDF1,RRBP1,PSMC5,AXIN1,GRIPAP1,UBXN7,HT…
HPA	liver; hepatocytes[≥Low]	HPA:0290401	1.2164629955912042e-8	7.914901097629158	5666	174	128	10877	RPL41,UQCRHL,SELENOT,BCKDHA,GOLGA4,INO80D,SAFB2,CNIH1,GOLGA3,SMG1,HDGFL2,SAFB,RPS14,SLC38A10,ZNF638,ZNF207,SREK1,N4BP2,ZBTB37,LYPLA1,ATP5MG,NUMA1,SNRPG,COX7C,UPF1,RBM6,ZNF37A,NONO,ANKRD12,KRI1,KIF7,MMADHC,UBTF,CNIH4,GAK,RIF1,CRTAP,LUC7L,GCC2,OLA1,CTNNBL1,RPL23A,POLD1,TIMM8B,NDUFC2,MTX3,NASP,CHD2,PEX2,PPP2CA,SURF6,EDF1,RRBP1,PSMC5,AXIN1,GRIPAP1,UBXN7,HTATSF1,ARFRP1,MOB1B,RER1,EIF3CL,CDK11B,PELP1,Z…
HPA	ovary; ovarian stroma cells[≥Medium]	HPA:0340462	1.31153635740548e-8	7.882219665728056	2033	174	65	10877	RPL41,BCKDHA,INO80D,SAFB2,CNIH1,HDGFL2,SAFB,ZNF207,SREK1,NUMA1,SNRPG,COX7C,RBM6,ZNF37A,NONO,NIPBL,RANBP2,ANKRD12,UBTF,RSF1,RIF1,LUC7L,GCC2,POLD1,MTX3,FAM50A,RNF139,SURF6,RRBP1,AXIN1,UBXN7,HTATSF1,EIF3CL,CDK11B,PELP1,ZNF707,GOLGB1,DAPK3,DAZAP1,CCDC9,TELO2,CCDC12,EIF3A,TAF10,HNRNPLL,SSR3,SRPRB,SNRNP70,CANX,EWSR1,GRINA,SSB,DOHH,NCK1,NXF1,LUC7L3,PTPN11,THRAP3,SMAD4,TBCA,ARL5A,NSMCE2,CAPZA1,MORC2,RPA3
HPA	cerebellum; cells in molecular layer[≥Low]	HPA:0090191	1.3414423734299411e-8	7.872427979301353	4388	174	108	10877	RPL41,BCKDHA,DMAC1,GOLGA4,INO80D,SAFB2,CNIH1,GOLGA3,HDGFL2,SAFB,RPS14,KIAA0232,SLC38A10,ZNF638,ZNF207,SREK1,ZBTB37,NUMA1,SNRPG,COX7C,UPF1,RBM6,ZNF37A,NONO,NIPBL,RANBP2,ANKRD12,KRI1,KIF3A,RSF1,GAK,RIF1,CRTAP,LUC7L,GCC2,OLA1,CTNNBL1,POLD1,NDUFC2,PNISR,PTRHD1,NASP,CHD2,FAM50A,MBD3,CEP131,PPP2CA,SURF6,EDF1,RRBP1,PSMC5,AXIN1,GRIPAP1,ARFRP1,RER1,EIF3CL,CDK11B,PELP1,ZNF707,GOLGB1,DAPK3,MACF1,DAZAP1,RPL1…
HPA	placenta; decidual cells[≥Low]	HPA:0380511	1.4436354594936237e-8	7.840542459063847	4765	174	114	10877	RPL41,UQCRHL,BCKDHA,DMAC1,GOLGA4,INO80D,SAFB2,HDGFL2,SAFB,KCMF1,RPS14,CCDC88B,KIAA0232,FKBP2,ZNF638,ZNF207,SREK1,ZBTB37,NUMA1,SNRPG,COX7C,UPF1,RBM6,ZNF37A,NONO,KRI1,KIF7,UBTF,RSF1,GAK,RIF1,CRTAP,LUC7L,OLA1,CTNNBL1,RPL23A,POLD1,PNISR,TTBK2,NASP,CHD2,MBD3,RNF139,PPP2CA,EDF1,RRBP1,PSMC5,AXIN1,GRIPAP1,UBXN7,ARFRP1,RER1,EIF3CL,PELP1,ZNF707,DAPK3,DAZAP1,CCDC9,RPL10A,PCBP2,INTS1,CCDC12,ARHGEF18,TBL3,PSE…
HPA	cerebellum; Purkinje cells[High]	HPA:0090163	1.5708665225978187e-8	7.803860715636007	1528	174	54	10877	RPL41,BCKDHA,GOLGA4,SAFB2,CNIH1,SMG1,HDGFL2,SAFB,ZNF638,ZNF207,NUMA1,SNRPG,COX7C,ZNF37A,NONO,RANBP2,ANKRD12,KIF3A,GCC2,OLA1,POLD1,MTX3,CHD2,RRBP1,PSMC5,AXIN1,MOB1B,RER1,EIF3CL,CDK11B,PELP1,GOLGB1,DAZAP1,RPL10A,PCBP2,TAF10,RESF1,RPS3A,HNRNPLL,SUGP2,SNRNP70,SLC25A5,RBM15,SSB,PPAN,NXF1,LUC7L3,PTPN11,THRAP3,RAI1,NSMCE2,MORC2,MRFAP1,RPA3
HPA	spleen; cells in white pulp[≥Low]	HPA:0530721	1.865930830664731e-8	7.729104459419851	4290	174	106	10877	RPL41,UQCRHL,BCKDHA,GOLGA4,INO80D,SAFB2,CNIH1,GOLGA3,HDGFL2,SAFB,RPS14,CCDC88B,KIAA0232,SLC38A10,ZNF207,SREK1,N4BP2,ZBTB37,NUMA1,SNRPG,COX7C,RBM6,ZNF37A,NONO,RANBP2,ANKRD12,MMADHC,UBTF,RSF1,CNIH4,GAK,RIF1,CRTAP,LUC7L,OLA1,POLD1,TIMM8B,NDUFC2,PTRHD1,NASP,CHD2,PEX2,FAM50A,PPP2CA,SURF6,EDF1,RRBP1,PSMC5,GRIPAP1,HTATSF1,ARFRP1,MOB1B,RER1,EIF3CL,CDK11B,PELP1,GOLGB1,DAZAP1,CCDC9,TELO2,PCBP2,CCDC12,ARHGE…
HPA	testis; Leydig cells[≥Low]	HPA:0570731	1.9206063856702795e-8	7.716561631518899	7077	174	147	10877	RPL41,UQCRHL,SELENOT,BCKDHA,INO80D,SAFB2,CNIH1,GOLGA3,SMG1,HDGFL2,SAFB,KCMF1,RPS14,CCDC88B,KIAA0232,SLC38A10,ZNF638,ZNF207,SREK1,ZBTB37,LYPLA1,ATP5MG,NUMA1,SNRPG,COX7C,UPF1,RBM6,ZNF37A,NONO,NIPBL,RANBP2,ANKRD12,KIF7,KIF3A,MMADHC,UBTF,RSF1,CNIH4,GAK,RIF1,CRTAP,LUC7L,GCC2,OLA1,CTNNBL1,RPL23A,POLD1,TIMM8B,NDUFC2,YWHAQ,MTX3,PTRHD1,PEX2,FAM50A,RNF139,CEP131,PPP2CA,SURF6,RRBP1,PSMC5,AXIN1,GRIPAP1,UBXN7…
HPA	skin 2; epidermal cells[≥Medium]	HPA:0470682	1.9355495311217066e-8	7.7131957105152145	4787	174	114	10877	RPL41,UQCRHL,BCKDHA,DMAC1,GOLGA4,INO80D,SAFB2,GOLGA3,SMG1,HDGFL2,SAFB,KCMF1,RPS14,KIAA0232,ZNF638,ZNF207,SREK1,N4BP2,ZBTB37,NUMA1,SNRPG,COX7C,UPF1,RBM6,NONO,NIPBL,RANBP2,ANKRD12,KRI1,KIF7,UBTF,RSF1,CNIH4,RIF1,CRTAP,LUC7L,GCC2,OLA1,CTNNBL1,RPL23A,POLD1,TIMM8B,NDUFC2,PNISR,PTRHD1,NASP,FAM50A,RNF139,PPP2CA,SURF6,EDF1,RRBP1,PSMC5,AXIN1,UBXN7,HTATSF1,ARFRP1,RER1,EIF3CL,CDK11B,PELP1,ZNF707,GOLGB1,DAPK3…
HPA	appendix; glandular cells[High]	HPA:0030053	2.1017147416434732e-8	7.677426229571854	2010	174	64	10877	RPL41,UQCRHL,BCKDHA,GOLGA4,INO80D,SAFB2,GOLGA3,SAFB,RPS14,KIAA0232,ZNF207,NUMA1,COX7C,RBM6,NONO,RANBP2,CNIH4,GAK,LUC7L,GCC2,OLA1,POLD1,NASP,FAM50A,RRBP1,HTATSF1,ARFRP1,MOB1B,RER1,EIF3CL,CDK11B,PELP1,ZNF707,GOLGB1,DAZAP1,RPL10A,CCDC12,TAF10,SDHAF4,HNRNPLL,KIF5B,SMG6,SNRNP70,AKAP13,CANX,EWSR1,SSB,GLB1,DOHH,NCK1,NXF1,LUC7L3,HDAC4,PAF1,LNPEP,THRAP3,SMAD4,TULP4,TBCA,DPP8,KCNS3,NSMCE2,MORC2,RPA3
HPA	nasopharynx; respiratory epithelial cells[High]	HPA:0320103	2.2667832930514322e-8	7.644589996913862	1870	174	61	10877	BCKDHA,GOLGA4,INO80D,SAFB2,HDGFL2,SAFB,RPS14,KIAA0232,ZNF638,ZNF207,NUMA1,SNRPG,COX7C,ZNF37A,NONO,RANBP2,ANKRD12,UBTF,RSF1,CNIH4,LUC7L,GCC2,POLD1,FAM50A,RRBP1,PSMC5,AXIN1,GRIPAP1,UBXN7,HTATSF1,RER1,EIF3CL,CDK11B,PELP1,ZNF707,GOLGB1,DAZAP1,PCBP2,CCDC12,TAF10,RPS3A,SDHAF4,HNRNPLL,SNRNP70,CANX,EWSR1,SSB,DOHH,ZBTB17,NCK1,NXF1,LUC7L3,HDAC4,THRAP3,TULP4,TBCA,RAI1,NSMCE2,MORC2,MRFAP1,RPA3
HPA	cerebellum; cells in granular layer[≥Low]	HPA:0090181	2.2925181439613296e-8	7.639687218453535	4489	174	109	10877	UQCRHL,BCKDHA,GOLGA4,INO80D,SAFB2,CNIH1,GOLGA3,SMG1,HDGFL2,SAFB,KIAA0232,SLC38A10,ZNF638,ZNF207,SREK1,N4BP2,ZBTB37,ATP5MG,NUMA1,SNRPG,COX7C,UPF1,RBM6,ZNF37A,NONO,NIPBL,RANBP2,ANKRD12,KRI1,KIF7,MMADHC,RSF1,CNIH4,GAK,RIF1,CRTAP,LUC7L,GCC2,OLA1,POLD1,TIMM8B,NDUFC2,MTX3,NASP,CHD2,FAM50A,MBD3,PPP2CA,SURF6,EDF1,RRBP1,PSMC5,AXIN1,GRIPAP1,UBXN7,MOB1B,RER1,EIF3CL,CDK11B,ZNF707,GOLGB1,DAPK3,DAZAP1,CCDC9,TE…
HPA	skin 1; Langerhans[≥Medium]	HPA:0460642	2.518370025890647e-8	7.598880458344124	3159	174	86	10877	UQCRHL,BCKDHA,GOLGA4,INO80D,CNIH1,HDGFL2,SAFB,RPS14,ZNF638,ZNF207,SREK1,ZBTB37,NUMA1,SNRPG,COX7C,UPF1,RBM6,ZNF37A,NONO,NIPBL,RANBP2,ANKRD12,KRI1,KIF7,UBTF,RSF1,RIF1,CRTAP,LUC7L,OLA1,POLD1,FAM50A,SURF6,EDF1,RRBP1,AXIN1,HTATSF1,ARFRP1,EIF3CL,CDK11B,PELP1,ZNF707,GOLGB1,DAPK3,DAZAP1,CCDC9,RPL10A,PCBP2,INTS1,CCDC12,ARHGEF18,EIF3A,TAF10,RPS3A,SDHAF4,UBE2D2,HNRNPLL,CFAP410,KIF5B,DNAJC5,SNRNP70,AKAP13,UB…
HPA	hippocampus; glial cells[≥Low]	HPA:0250121	2.8653426452152072e-8	7.542823436513911	4082	174	102	10877	SELENOT,BCKDHA,DMAC1,GOLGA4,INO80D,SAFB2,CNIH1,GOLGA3,HDGFL2,SAFB,RPS14,KIAA0232,SLC38A10,ZNF207,SREK1,ZBTB37,ATP5MG,NUMA1,SNRPG,COX7C,UPF1,RBM6,ZNF37A,NONO,RANBP2,ANKRD12,KRI1,KIF7,MMADHC,UBTF,RSF1,CNIH4,RIF1,CRTAP,LUC7L,GCC2,OLA1,POLD1,NDUFC2,PNISR,NASP,CHD2,PEX2,FAM50A,MBD3,PPP2CA,SURF6,EDF1,RRBP1,PSMC5,AXIN1,GRIPAP1,HTATSF1,RER1,EIF3CL,CDK11B,PELP1,GOLGB1,DAPK3,MACF1,DAZAP1,TELO2,PCBP2,C3ORF3…
HPA	colon; peripheral nerve/ganglion[≥Low]	HPA:0130241	2.9131356592397964e-8	7.53563929062553	5073	174	118	10877	RPL41,UQCRHL,SELENOT,BCKDHA,DMAC1,INO80D,SAFB2,GOLGA3,SMG1,HDGFL2,SAFB,KCMF1,RPS14,CCDC88B,KIAA0232,SLC38A10,ZNF638,ZNF207,SREK1,ZBTB37,NUMA1,SNRPG,UPF1,ZNF37A,NONO,NIPBL,KRI1,KIF7,KIF3A,MMADHC,RSF1,GAK,CRTAP,LUC7L,GCC2,OLA1,CTNNBL1,RPL23A,POLD1,TIMM8B,YWHAQ,MTX3,PNISR,PTRHD1,TTBK2,CHD2,PEX2,FAM50A,MBD3,RNF139,CEP131,PPP2CA,SURF6,EDF1,RRBP1,AXIN1,GRIPAP1,UBXN7,HTATSF1,ARFRP1,RER1,EIF3CL,CDK11B,PE…
HPA	skin 1; melanocytes[≥Medium]	HPA:0460672	3.076242802574859e-8	7.5119793893982605	3736	174	96	10877	UQCRHL,BCKDHA,GOLGA4,SAFB2,CNIH1,GOLGA3,HDGFL2,SAFB,RPS14,CCDC88B,ZNF638,ZNF207,SREK1,NUMA1,SNRPG,COX7C,RBM6,ZNF37A,NONO,NIPBL,ANKRD12,KRI1,KIF7,UBTF,RSF1,CRTAP,LUC7L,GCC2,OLA1,CTNNBL1,POLD1,TIMM8B,NDUFC2,FAM50A,PPP2CA,SURF6,RRBP1,PSMC5,UBXN7,HTATSF1,ARFRP1,RER1,EIF3CL,CDK11B,PELP1,ZNF707,GOLGB1,DAPK3,DAZAP1,CCDC9,RPL10A,TELO2,PCBP2,INTS1,CCDC12,ARHGEF18,PSENEN,EIF3A,TAF10,RPS3A,SDHAF4,HNRNPLL,CF…
HPA	spleen	HPA:0530000	3.23281974334326e-8	7.49041851025198	5811	174	129	10877	RPL41,UQCRHL,BCKDHA,GOLGA4,INO80D,SAFB2,CNIH1,GOLGA3,HDGFL2,SAFB,RPS14,CCDC88B,KIAA0232,SLC38A10,FKBP2,ZNF638,ZNF207,SREK1,N4BP2,ZBTB37,ATP5MG,NUMA1,SNRPG,COX7C,RBM6,ZNF37A,NONO,RANBP2,ANKRD12,MMADHC,UBTF,RSF1,CNIH4,GAK,RIF1,CRTAP,LUC7L,OLA1,POLD1,TIMM8B,NDUFC2,YWHAQ,PTRHD1,TTBK2,NASP,CHD2,PEX2,FAM50A,MBD3,SREK1IP1,PPP2CA,SURF6,EDF1,RRBP1,PSMC5,AXIN1,GRIPAP1,UBXN7,HTATSF1,ARFRP1,MOB1B,RER1,EIF3CL…
HPA	skin 1; fibroblasts[≥Low]	HPA:0460651	3.286080917415983e-8	7.483321746575158	4765	174	113	10877	RPL41,UQCRHL,SELENOT,BCKDHA,GOLGA4,CNIH1,GOLGA3,SMG1,HDGFL2,SAFB,KCMF1,RPS14,CCDC88B,SLC38A10,ZNF638,ZNF207,SREK1,N4BP2,ZBTB37,ATP5MG,NUMA1,SNRPG,COX7C,UPF1,RBM6,NONO,NIPBL,RANBP2,ANKRD12,KRI1,KIF7,MMADHC,UBTF,RSF1,RIF1,CRTAP,LUC7L,OLA1,CTNNBL1,POLD1,TIMM8B,NDUFC2,YWHAQ,PNISR,PTRHD1,NASP,FAM50A,SREK1IP1,RNF139,PPP2CA,SURF6,EDF1,RRBP1,PSMC5,AXIN1,HTATSF1,ARFRP1,MOB1B,RER1,EIF3CL,CDK11B,PELP1,ZNF70…
HPA	tonsil; non-germinal center cells[≥Low]	HPA:0600441	3.370479736401953e-8	7.472308279531055	6022	174	132	10877	RPL41,UQCRHL,BCKDHA,DMAC1,GOLGA4,INO80D,SAFB2,CNIH1,GOLGA3,HDGFL2,SAFB,KCMF1,RPS14,CCDC88B,KIAA0232,SLC38A10,FKBP2,ZNF638,ZNF207,SREK1,N4BP2,ZBTB37,ATP5MG,NUMA1,SNRPG,COX7C,UPF1,RBM6,ZNF37A,NONO,NIPBL,RANBP2,ANKRD12,KIF7,MMADHC,UBTF,RSF1,GAK,RIF1,CRTAP,LUC7L,GCC2,OLA1,RPL23A,POLD1,TIMM8B,NDUFC2,YWHAQ,PNISR,PTRHD1,TTBK2,NASP,CHD2,FAM50A,MBD3,SREK1IP1,PPP2CA,SURF6,EDF1,RRBP1,PSMC5,GRIPAP1,UBXN7,HTA…
HPA	cerebral cortex; endothelial cells[≥Low]	HPA:0100201	3.585380209442639e-8	7.445464783062452	4585	174	110	10877	SELENOT,BCKDHA,DMAC1,GOLGA4,INO80D,SAFB2,CNIH1,GOLGA3,SMG1,HDGFL2,SAFB,KCMF1,RPS14,CCDC88B,KIAA0232,SLC38A10,ZNF638,ZNF207,SREK1,N4BP2,ATP5MG,NUMA1,SNRPG,COX7C,UPF1,RBM6,ZNF37A,NONO,NIPBL,RANBP2,ANKRD12,KRI1,KIF7,MMADHC,UBTF,CRTAP,LUC7L,OLA1,CTNNBL1,POLD1,NDUFC2,MTX3,NASP,FAM50A,MBD3,SREK1IP1,RNF139,CEP131,PPP2CA,SURF6,RRBP1,PSMC5,AXIN1,UBXN7,HTATSF1,ARFRP1,MOB1B,RER1,EIF3CL,CDK11B,GOLGB1,DAPK3,M…
HPA	heart muscle; cardiomyocytes[≥Medium]	HPA:0241102	4.946661109767493e-8	7.305687841647005	4302	174	105	10877	UQCRHL,BCKDHA,DMAC1,GOLGA4,INO80D,SAFB2,SMG1,HDGFL2,SAFB,KIAA0232,SLC38A10,ZNF207,SREK1,N4BP2,ZBTB37,ATP5MG,NUMA1,SNRPG,COX7C,RBM6,ZNF37A,NONO,NIPBL,RANBP2,ANKRD12,KIF7,MMADHC,UBTF,CNIH4,GAK,KIAA1109,RIF1,CRTAP,LUC7L,GCC2,CTNNBL1,RPL23A,POLD1,NDUFC2,MTX3,PNISR,FAM50A,PPP2CA,SURF6,EDF1,PSMC5,AXIN1,HTATSF1,ARFRP1,MOB1B,RER1,CDK11B,PELP1,ZNF707,GOLGB1,DAPK3,MACF1,DAZAP1,CCDC9,RPL10A,MINDY2,PCBP2,ARH…
HPA	bone marrow	HPA:0040000	4.95901747183263e-8	7.30460436158041	6406	174	137	10877	RPL41,BCKDHA,GOLGA4,INO80D,SAFB2,CNIH1,GOLGA3,SMG1,HDGFL2,SAFB,KCMF1,RPS14,CCDC88B,KIAA0232,SLC38A10,ZNF638,ZNF207,SREK1,N4BP2,ZBTB37,ATP5MG,NUMA1,SNRPG,COX7C,UPF1,RBM6,NONO,NIPBL,RANBP2,ANKRD12,KRI1,KIF3A,MMADHC,UBTF,RSF1,GAK,RIF1,CRTAP,LUC7L,GCC2,OLA1,CTNNBL1,POLD1,TIMM8B,MTX3,PTRHD1,NASP,CHD2,FAM50A,MBD3,SREK1IP1,RNF139,PPP2CA,SURF6,EDF1,RRBP1,PSMC5,AXIN1,GRIPAP1,UBXN7,HTATSF1,ARFRP1,MOB1B,RER…
HPA	bone marrow; hematopoietic cells[≥Low]	HPA:0040081	4.95901747183263e-8	7.30460436158041	6406	174	137	10877	RPL41,BCKDHA,GOLGA4,INO80D,SAFB2,CNIH1,GOLGA3,SMG1,HDGFL2,SAFB,KCMF1,RPS14,CCDC88B,KIAA0232,SLC38A10,ZNF638,ZNF207,SREK1,N4BP2,ZBTB37,ATP5MG,NUMA1,SNRPG,COX7C,UPF1,RBM6,NONO,NIPBL,RANBP2,ANKRD12,KRI1,KIF3A,MMADHC,UBTF,RSF1,GAK,RIF1,CRTAP,LUC7L,GCC2,OLA1,CTNNBL1,POLD1,TIMM8B,MTX3,PTRHD1,NASP,CHD2,FAM50A,MBD3,SREK1IP1,RNF139,PPP2CA,SURF6,EDF1,RRBP1,PSMC5,AXIN1,GRIPAP1,UBXN7,HTATSF1,ARFRP1,MOB1B,RER…
HPA	fallopian tube; glandular cells[High]	HPA:0210053	5.143029986639164e-8	7.288780943500424	1771	174	58	10877	RPL41,BCKDHA,INO80D,SAFB2,CNIH1,HDGFL2,SAFB,SLC38A10,ZNF207,NUMA1,COX7C,ZNF37A,NONO,ANKRD12,UBTF,CNIH4,CRTAP,LUC7L,GCC2,OLA1,POLD1,NASP,FAM50A,RRBP1,AXIN1,GRIPAP1,HTATSF1,RER1,EIF3CL,CDK11B,PELP1,ZNF707,GOLGB1,DAZAP1,RPL10A,CCDC12,TAF10,SDHAF4,HNRNPLL,KIF5B,SMG6,SSR3,SNRNP70,AKAP13,CANX,EWSR1,SSB,PPAN,ZBTB17,NXF1,LUC7L3,PTPN11,HDAC4,THRAP3,TULP4,NSMCE2,MRFAP1,RPA3
HPA	spleen; cells in red pulp[≥Low]	HPA:0530711	5.233675694383369e-8	7.281193191994834	5249	174	120	10877	BCKDHA,GOLGA4,INO80D,SAFB2,CNIH1,GOLGA3,HDGFL2,SAFB,RPS14,CCDC88B,KIAA0232,SLC38A10,FKBP2,ZNF638,ZNF207,SREK1,N4BP2,ZBTB37,ATP5MG,NUMA1,SNRPG,COX7C,RBM6,ZNF37A,NONO,RANBP2,ANKRD12,UBTF,RSF1,CNIH4,GAK,RIF1,CRTAP,LUC7L,OLA1,POLD1,NDUFC2,YWHAQ,PTRHD1,TTBK2,NASP,CHD2,PEX2,FAM50A,MBD3,SREK1IP1,PPP2CA,SURF6,EDF1,RRBP1,PSMC5,AXIN1,GRIPAP1,UBXN7,HTATSF1,ARFRP1,MOB1B,RER1,EIF3CL,CDK11B,PELP1,ZNF707,GOLGB1…
HPA	cerebellum; cells in granular layer[≥Medium]	HPA:0090182	5.4465824070241064e-8	7.263875921087684	2885	174	80	10877	UQCRHL,BCKDHA,GOLGA4,SAFB2,CNIH1,SMG1,HDGFL2,SAFB,KIAA0232,ZNF638,ZNF207,SREK1,N4BP2,ATP5MG,NUMA1,SNRPG,COX7C,RBM6,ZNF37A,NONO,RANBP2,ANKRD12,KIF7,CNIH4,GAK,RIF1,LUC7L,GCC2,OLA1,NDUFC2,MTX3,CHD2,FAM50A,MBD3,PPP2CA,SURF6,EDF1,RRBP1,PSMC5,MOB1B,RER1,CDK11B,ZNF707,GOLGB1,DAPK3,DAZAP1,TELO2,PCBP2,CCDC12,PSENEN,TAF10,RESF1,RPS3A,SDHAF4,HNRNPLL,CFAP410,SMG6,SUGP2,DNAJC5,SNRNP70,CANX,EWSR1,SSB,DOHH,CMC4…
HPA	endometrium 1; glandular cells[≥Medium]	HPA:0160052	6.017394453895538e-8	7.220591518583927	5066	174	117	10877	RPL41,BCKDHA,GOLGA4,INO80D,SAFB2,CNIH1,GOLGA3,SMG1,HDGFL2,SAFB,KCMF1,RPS14,KIAA0232,SLC38A10,ZNF638,ZNF207,SREK1,N4BP2,ZBTB37,LYPLA1,NUMA1,SNRPG,COX7C,UPF1,RBM6,ZNF37A,NONO,RANBP2,ANKRD12,KIF7,MMADHC,RSF1,CNIH4,GAK,RIF1,CRTAP,LUC7L,GCC2,OLA1,POLD1,TIMM8B,NDUFC2,YWHAQ,MTX3,PNISR,PTRHD1,NASP,CHD2,FAM50A,RNF139,PPP2CA,SURF6,EDF1,RRBP1,PSMC5,AXIN1,GRIPAP1,HTATSF1,ARFRP1,MOB1B,RER1,EIF3CL,CDK11B,PELP1…
HPA	liver; cholangiocytes[≥Low]	HPA:0291161	6.604902631659863e-8	7.180133580296921	3908	174	98	10877	RPL41,BCKDHA,DMAC1,GOLGA4,INO80D,SAFB2,CNIH1,GOLGA3,HDGFL2,SAFB,CCDC88B,KIAA0232,SLC38A10,ZNF207,SREK1,ZBTB37,LYPLA1,NUMA1,SNRPG,COX7C,RBM6,ZNF37A,NONO,RANBP2,ANKRD12,KIF7,UBTF,CNIH4,RIF1,CRTAP,LUC7L,GCC2,OLA1,POLD1,YWHAQ,MTX3,PEX2,FAM50A,RNF139,PPP2CA,SURF6,EDF1,RRBP1,PSMC5,AXIN1,HTATSF1,ARFRP1,RER1,EIF3CL,CDK11B,ZNF707,GOLGB1,DAZAP1,RPL10A,TELO2,MINDY2,INTS1,CCDC12,EIF3A,RESF1,SDHAF4,UBE2D2,HNR…
HPA	skin 1; fibroblasts[≥Medium]	HPA:0460652	6.98130287304773e-8	7.156063520389244	3340	174	88	10877	BCKDHA,GOLGA4,CNIH1,GOLGA3,HDGFL2,SAFB,RPS14,CCDC88B,SLC38A10,ZNF638,ZNF207,SREK1,N4BP2,ZBTB37,NUMA1,SNRPG,COX7C,RBM6,NONO,NIPBL,RANBP2,ANKRD12,KIF7,MMADHC,UBTF,RSF1,RIF1,CRTAP,LUC7L,OLA1,CTNNBL1,POLD1,TIMM8B,YWHAQ,PTRHD1,FAM50A,SREK1IP1,RNF139,SURF6,RRBP1,PSMC5,AXIN1,HTATSF1,ARFRP1,MOB1B,RER1,EIF3CL,PELP1,ZNF707,GOLGB1,DAPK3,DAZAP1,CCDC9,TELO2,PCBP2,INTS1,CCDC12,ARHGEF18,PSENEN,EIF3A,TAF10,RPS3A…
HPA	cerebral cortex; glial cells[≥Medium]	HPA:0100122	6.98130287304773e-8	7.156063520389244	2636	174	75	10877	GOLGA4,SAFB2,CNIH1,HDGFL2,SAFB,KIAA0232,ZNF638,ZNF207,SREK1,NUMA1,SNRPG,UPF1,RBM6,ZNF37A,NONO,RANBP2,ANKRD12,KIF3A,MMADHC,UBTF,RSF1,RIF1,LUC7L,OLA1,NDUFC2,YWHAQ,PNISR,PEX2,FAM50A,PPP2CA,SURF6,EDF1,RRBP1,PSMC5,AXIN1,HTATSF1,RER1,EIF3CL,CDK11B,PELP1,GOLGB1,MACF1,DAZAP1,PCBP2,C3ORF38,CCDC12,TAF10,RESF1,RPS3A,SDHAF4,HNRNPLL,CFAP410,KIF5B,SUGP2,SSR3,SNRNP70,AKAP13,CANX,EWSR1,SSB,DOHH,EVI5,NXF1,LUC7L3,…
HPA	cervix, uterine; glandular cells[≥Medium]	HPA:0110052	7.115673035829903e-8	7.147784015899694	3973	174	99	10877	RPL41,BCKDHA,GOLGA4,INO80D,SAFB2,CNIH1,GOLGA3,SMG1,HDGFL2,SAFB,KCMF1,RPS14,CCDC88B,KIAA0232,SLC38A10,ZNF638,ZNF207,SREK1,NUMA1,SNRPG,COX7C,RBM6,ZNF37A,NONO,RANBP2,ANKRD12,KRI1,UBTF,RSF1,RIF1,CRTAP,LUC7L,OLA1,POLD1,TIMM8B,NDUFC2,PNISR,NASP,CHD2,FAM50A,SURF6,EDF1,RRBP1,PSMC5,AXIN1,GRIPAP1,HTATSF1,ARFRP1,MOB1B,RER1,EIF3CL,CDK11B,PELP1,ZNF707,GOLGB1,DAZAP1,TELO2,PCBP2,INTS1,C3ORF38,CCDC12,PSENEN,TAF1…
HPA	kidney; cells in glomeruli[≥Medium]	HPA:0270352	7.331672132677303e-8	7.13479696462537	2959	174	81	10877	BCKDHA,GOLGA4,INO80D,SAFB2,CNIH1,GOLGA3,HDGFL2,SAFB,KCMF1,RPS14,KIAA0232,SLC38A10,ZNF638,ZNF207,SREK1,ZBTB37,NUMA1,SNRPG,COX7C,RBM6,ZNF37A,NONO,NIPBL,ANKRD12,UBTF,RSF1,RIF1,CRTAP,LUC7L,POLD1,CHD2,FAM50A,RNF139,SURF6,RRBP1,PSMC5,AXIN1,UBXN7,ARFRP1,RER1,CDK11B,PELP1,ZNF707,GOLGB1,DAPK3,MACF1,DAZAP1,CCDC9,TELO2,MINDY2,C3ORF38,CCDC12,EIF3A,TAF10,SDHAF4,HNRNPLL,CFAP410,KIF5B,SMG6,SUGP2,SNRNP70,UBXN1,C…
HPA	appendix; lymphoid tissue[≥Low]	HPA:0030071	8.309747943179016e-8	7.0804121493261984	5028	174	116	10877	RPL41,GOLGA4,INO80D,SAFB2,CNIH1,HDGFL2,SAFB,KCMF1,RPS14,CCDC88B,KIAA0232,SLC38A10,ZNF638,ZNF207,SREK1,N4BP2,ZBTB37,ATP5MG,NUMA1,SNRPG,COX7C,UPF1,RBM6,ZNF37A,NONO,NIPBL,RANBP2,UBTF,RSF1,CNIH4,KIAA1109,RIF1,CRTAP,LUC7L,OLA1,RPL23A,POLD1,TIMM8B,MTX3,TTBK2,NASP,FAM50A,PPP2CA,SURF6,RRBP1,PSMC5,AXIN1,GRIPAP1,UBXN7,HTATSF1,RER1,EIF3CL,CDK11B,PELP1,ZNF707,GOLGB1,DAPK3,DAZAP1,CCDC9,TELO2,PCBP2,INTS1,C3ORF…
HPA	parathyroid gland	HPA:0360000	8.744204490432096e-8	7.0582796946050355	5824	174	128	10877	RPL41,UQCRHL,SELENOT,BCKDHA,GOLGA4,INO80D,CNIH1,HDGFL2,SAFB,KCMF1,RPS14,CCDC88B,SLC38A10,FKBP2,ZNF638,ZNF207,SREK1,N4BP2,ZBTB37,NUMA1,SNRPG,COX7C,UPF1,RBM6,ZNF37A,NONO,RANBP2,ANKRD12,KRI1,KIF7,KIF3A,MMADHC,UBTF,RSF1,CNIH4,GAK,RIF1,CRTAP,LUC7L,GCC2,OLA1,CTNNBL1,RPL23A,POLD1,TIMM8B,NDUFC2,YWHAQ,MTX3,PTRHD1,TTBK2,NASP,CHD2,PEX2,FAM50A,MBD3,PPP2CA,SURF6,RRBP1,PSMC5,AXIN1,GRIPAP1,HTATSF1,ARFRP1,MOB1B,…
HPA	parathyroid gland; glandular cells[≥Low]	HPA:0360051	8.744204490432096e-8	7.0582796946050355	5824	174	128	10877	RPL41,UQCRHL,SELENOT,BCKDHA,GOLGA4,INO80D,CNIH1,HDGFL2,SAFB,KCMF1,RPS14,CCDC88B,SLC38A10,FKBP2,ZNF638,ZNF207,SREK1,N4BP2,ZBTB37,NUMA1,SNRPG,COX7C,UPF1,RBM6,ZNF37A,NONO,RANBP2,ANKRD12,KRI1,KIF7,KIF3A,MMADHC,UBTF,RSF1,CNIH4,GAK,RIF1,CRTAP,LUC7L,GCC2,OLA1,CTNNBL1,RPL23A,POLD1,TIMM8B,NDUFC2,YWHAQ,MTX3,PTRHD1,TTBK2,NASP,CHD2,PEX2,FAM50A,MBD3,PPP2CA,SURF6,RRBP1,PSMC5,AXIN1,GRIPAP1,HTATSF1,ARFRP1,MOB1B,…
HPA	soft tissue 1	HPA:0500000	8.825208114258342e-8	7.05427504437546	5292	174	120	10877	RPL41,BCKDHA,DMAC1,GOLGA4,INO80D,SAFB2,CNIH1,GOLGA3,SMG1,HDGFL2,SAFB,RPS14,CCDC88B,KIAA0232,SLC38A10,FKBP2,ZNF638,ZNF207,SREK1,N4BP2,ZBTB37,ATP5MG,NUMA1,SNRPG,COX7C,UPF1,RBM6,ZNF37A,NONO,NIPBL,RANBP2,ANKRD12,KIF7,MMADHC,UBTF,RSF1,RIF1,CRTAP,LUC7L,GCC2,OLA1,CTNNBL1,RPL23A,POLD1,TIMM8B,YWHAQ,MTX3,NASP,CHD2,PEX2,FAM50A,RNF139,PPP2CA,SURF6,RRBP1,PSMC5,AXIN1,UBXN7,HTATSF1,ARFRP1,MOB1B,RER1,EIF3CL,CDK1…
HPA	soft tissue 1; peripheral nerve[≥Low]	HPA:0500701	9.157541217764945e-8	7.038221117915114	2760	174	77	10877	BCKDHA,DMAC1,GOLGA4,INO80D,SAFB2,GOLGA3,HDGFL2,SAFB,RPS14,KIAA0232,FKBP2,ZNF638,ZNF207,SREK1,ZBTB37,ATP5MG,NUMA1,ZNF37A,NONO,KIF7,UBTF,RIF1,CRTAP,GCC2,OLA1,POLD1,TIMM8B,MTX3,NASP,CHD2,FAM50A,PPP2CA,SURF6,RRBP1,PSMC5,RER1,EIF3CL,CDK11B,PELP1,GOLGB1,DAPK3,MACF1,DAZAP1,TELO2,INTS1,CCDC12,UBE2D2,HNRNPLL,CFAP410,DNAJC5,CFL2,OSER1,SNRNP70,AKAP13,UBXN1,CANX,GRINA,SSB,GLB1,DOHH,EVI5,ZBTB17,NXF1,LUC7L3,SL…
HPA	skin 1; Langerhans[≥Low]	HPA:0460641	1.0953113523964734e-7	6.960462411045488	4672	174	110	10877	UQCRHL,SELENOT,BCKDHA,GOLGA4,INO80D,CNIH1,GOLGA3,ALMS1,HDGFL2,SAFB,KCMF1,RPS14,SLC38A10,ZNF638,ZNF207,SREK1,N4BP2,ZBTB37,NUMA1,SNRPG,COX7C,UPF1,RBM6,ZNF37A,NONO,NIPBL,RANBP2,ANKRD12,KRI1,KIF7,UBTF,RSF1,RIF1,CRTAP,LUC7L,OLA1,CTNNBL1,POLD1,TIMM8B,NASP,CHD2,FAM50A,RNF139,PPP2CA,SURF6,EDF1,RRBP1,PSMC5,AXIN1,HTATSF1,ARFRP1,RER1,EIF3CL,CDK11B,PELP1,ZNF707,GOLGB1,DAPK3,MACF1,DAZAP1,CCDC9,RPL10A,PCBP2,IN…
HPA	adipose tissue; adipocytes[≥Low]	HPA:0010011	1.1659214134913421e-7	6.933330721307071	3893	174	97	10877	SELENOT,BCKDHA,GOLGA4,CNIH1,GOLGA3,SMG1,HDGFL2,SAFB,RPS14,KIAA0232,SLC38A10,ZNF638,ZNF207,N4BP2,ZBTB37,NUMA1,SNRPG,RBM6,ZNF37A,NONO,RANBP2,ANKRD12,KRI1,KIF7,UBTF,RIF1,CRTAP,LUC7L,GCC2,OLA1,POLD1,MTX3,PNISR,PTRHD1,FAM50A,MBD3,SREK1IP1,RNF139,PPP2CA,SURF6,RRBP1,PSMC5,AXIN1,HTATSF1,ARFRP1,RER1,EIF3CL,ZNF707,GOLGB1,DAPK3,MACF1,DAZAP1,CCDC9,TELO2,INTS1,C3ORF38,CCDC12,PSENEN,EIF3A,TAF10,RESF1,RPS3A,SDH…
HPA	adipose tissue	HPA:0010000	1.1659214134913421e-7	6.933330721307071	3893	174	97	10877	SELENOT,BCKDHA,GOLGA4,CNIH1,GOLGA3,SMG1,HDGFL2,SAFB,RPS14,KIAA0232,SLC38A10,ZNF638,ZNF207,N4BP2,ZBTB37,NUMA1,SNRPG,RBM6,ZNF37A,NONO,RANBP2,ANKRD12,KRI1,KIF7,UBTF,RIF1,CRTAP,LUC7L,GCC2,OLA1,POLD1,MTX3,PNISR,PTRHD1,FAM50A,MBD3,SREK1IP1,RNF139,PPP2CA,SURF6,RRBP1,PSMC5,AXIN1,HTATSF1,ARFRP1,RER1,EIF3CL,ZNF707,GOLGB1,DAPK3,MACF1,DAZAP1,CCDC9,TELO2,INTS1,C3ORF38,CCDC12,PSENEN,EIF3A,TAF10,RESF1,RPS3A,SDH…
HPA	bronchus; respiratory epithelial cells[High]	HPA:0060103	1.264186726800323e-7	6.8981887738149625	1916	174	60	10877	RPL41,BCKDHA,INO80D,SAFB2,SMG1,HDGFL2,SAFB,RPS14,KIAA0232,ZNF638,ZNF207,SREK1,NUMA1,SNRPG,COX7C,ZNF37A,NONO,RANBP2,ANKRD12,UBTF,CNIH4,LUC7L,GCC2,PNISR,FAM50A,RRBP1,PSMC5,AXIN1,HTATSF1,RER1,EIF3CL,PELP1,ZNF707,GOLGB1,DAZAP1,PCBP2,CCDC12,PSENEN,TAF10,SDHAF4,KIF5B,SMG6,SNRNP70,CANX,EWSR1,SSB,DOHH,CMC4,EVI5,ZBTB17,NCK1,NXF1,LUC7L3,HDAC4,THRAP3,TULP4,RAI1,NSMCE2,MRFAP1,RPA3
HPA	testis; Leydig cells[≥Medium]	HPA:0570732	1.36404086615519e-7	6.8651726181840615	5327	174	120	10877	RPL41,UQCRHL,SELENOT,BCKDHA,INO80D,SAFB2,CNIH1,SMG1,HDGFL2,SAFB,RPS14,CCDC88B,KIAA0232,SLC38A10,ZNF207,SREK1,ZBTB37,ATP5MG,NUMA1,SNRPG,COX7C,ZNF37A,NONO,RANBP2,ANKRD12,KIF7,MMADHC,UBTF,RSF1,CNIH4,GAK,RIF1,CRTAP,LUC7L,GCC2,OLA1,CTNNBL1,RPL23A,TIMM8B,NDUFC2,MTX3,PTRHD1,FAM50A,RNF139,PPP2CA,SURF6,RRBP1,PSMC5,AXIN1,GRIPAP1,UBXN7,ARFRP1,MOB1B,RER1,EIF3CL,CDK11B,PELP1,ZNF707,GOLGB1,DAPK3,MACF1,RPL10A,T…
HPA	testis; spermatogonia cells[≥Medium]	HPA:0570812	3.2079460883521423e-7	6.493772938931488	2367	174	68	10877	UQCRHL,BCKDHA,GOLGA4,HDGFL2,SAFB,SLC38A10,ZNF638,ZNF207,SREK1,NUMA1,SNRPG,UPF1,RBM6,NONO,NIPBL,RANBP2,KRI1,UBTF,RSF1,RIF1,LUC7L,CTNNBL1,POLD1,PTRHD1,NASP,FAM50A,MBD3,EDF1,RRBP1,PSMC5,UBXN7,HTATSF1,MOB1B,EIF3CL,CDK11B,PELP1,GOLGB1,DAZAP1,CCDC9,MINDY2,INTS1,TBL3,PSENEN,TAF10,RPS3A,SDHAF4,CFAP410,SUGP2,CFL2,SCAPER,SNRNP70,EWSR1,RBM15,SSB,PRAME,PPAN,ENGASE,NCK1,NXF1,LUC7L3,THRAP3,CLK1,SMAD4,DAZ1,ANTK…
[truncated: 119 more rows]
