# Supplementary material for: Machine Learning-Based Analysis of Glioma Grades Reveals Co-Enrichment
Source: Cancers (Basel). 2022 Feb 17;14(4):1014. doi: 10.3390/cancers14041014 (PMC8870250; doi:10.3390/cancers14041014)
Supplement: Supplementary file 1 [file cancers-14-01014-s001.zip › Table.S7.xlsx]

## Sheet: rules_CGP_G2vs.G3
rule	length	accuracy	support	pValue
IF MATZUK_SPERMATOCYTE(high) AND MATHEW_FANCONI_ANEMIA_GENES(high) AND MYLLYKANGAS_AMPLIFICATION_HOT_SPOT_15(high) THEN G3	3	1	39	3.55292632335162e-13
IF MEBARKI_HCC_PROGENITOR_FZD8CRD_UP(high) AND KRIEG_HYPOXIA_NOT_VIA_KDM3A(high) THEN G3	2	0.88136	52	3.90607219520981e-12
IF ZAMORA_NOS2_TARGETS_UP(high) AND MYLLYKANGAS_AMPLIFICATION_HOT_SPOT_15(high) THEN G3	2	0.89719	48	1.67744281296551e-11
IF ZAMORA_NOS2_TARGETS_UP(high) AND MATHEW_FANCONI_ANEMIA_GENES(high) AND MYLLYKANGAS_AMPLIFICATION_HOT_SPOT_15(high) THEN G3	3	0.97368	37	1.67744281296551e-11
IF HESS_TARGETS_OF_HOXA9_AND_MEIS1_UP(high) AND ZAMORA_NOS2_TARGETS_UP(high) AND MATHEW_FANCONI_ANEMIA_GENES(high) AND MYLLYKANGAS_AMPLIFICATION_HOT_SPOT_15(high) THEN G3	4	1	33	3.0306455151351e-11
IF KRIEG_HYPOXIA_NOT_VIA_KDM3A(high) AND MYLLYKANGAS_AMPLIFICATION_HOT_SPOT_15(high) THEN G3	2	0.86207	50	4.11032364177544e-11
IF HESS_TARGETS_OF_HOXA9_AND_MEIS1_UP(high) AND MATZUK_SPERMATOCYTE(high) AND ZAMORA_NOS2_TARGETS_UP(high) AND MYLLYKANGAS_AMPLIFICATION_HOT_SPOT_15(high) THEN G3	4	1	32	4.54349225512492e-11
IF MATZUK_SPERMATOCYTE(high) AND MYLLYKANGAS_AMPLIFICATION_HOT_SPOT_15(high) THEN G3	2	0.87477	46	4.54349225512492e-11
IF HESS_TARGETS_OF_HOXA9_AND_MEIS1_UP(high) AND MATZUK_SPERMATOCYTE(high) AND MYLLYKANGAS_AMPLIFICATION_HOT_SPOT_15(high) THEN G3	3	0.95	38	4.54349225512492e-11
IF ZERBINI_RESPONSE_TO_SULINDAC_DN(high) AND MYLLYKANGAS_AMPLIFICATION_HOT_SPOT_15(high) THEN G3	2	0.89429	44	4.6501967566827e-11
IF MYLLYKANGAS_AMPLIFICATION_HOT_SPOT_15(high) AND ZHOU_CELL_CYCLE_GENES_IN_IR_RESPONSE_2HR(high) THEN G3	2	0.88235	45	9.25974697485606e-11
IF MYLLYKANGAS_AMPLIFICATION_HOT_SPOT_15(high) AND NAKAYAMA_SOFT_TISSUE_TUMORS_PCA2_UP(high) THEN G3	2	0.90761	40	2.21603440554269e-10
IF HESS_TARGETS_OF_HOXA9_AND_MEIS1_UP(high) AND POMEROY_MEDULLOBLASTOMA_PROGNOSIS_DN(high) AND ZAMORA_NOS2_TARGETS_UP(high) AND MYLLYKANGAS_AMPLIFICATION_HOT_SPOT_15(high) THEN G3	4	1	30	2.21603440554269e-10
IF HESS_TARGETS_OF_HOXA9_AND_MEIS1_UP(high) AND MATHEW_FANCONI_ANEMIA_GENES(high) AND PURBEY_TARGETS_OF_CTBP1_AND_SATB1_UP(high) AND KRIEG_HYPOXIA_NOT_VIA_KDM3A(high) THEN G3	4	0.98333	30	2.21603440554269e-10
IF MATHEW_FANCONI_ANEMIA_GENES(high) AND KRIEG_HYPOXIA_NOT_VIA_KDM3A(high) THEN G3	2	0.8922	41	4.88622851645388e-10
IF HESS_TARGETS_OF_HOXA9_AND_MEIS1_UP(high) AND KRIEG_HYPOXIA_NOT_VIA_KDM3A(high) AND MYLLYKANGAS_AMPLIFICATION_HOT_SPOT_15(high) AND ZHOU_CELL_CYCLE_GENES_IN_IR_RESPONSE_2HR(high) THEN G3	4	1	29	4.88622851645388e-10
IF KRIEG_HYPOXIA_NOT_VIA_KDM3A(high) AND ZHOU_CELL_CYCLE_GENES_IN_IR_RESPONSE_2HR(high) THEN G3	2	0.85185	46	5.25651728634071e-10
IF HESS_TARGETS_OF_HOXA9_AND_MEIS1_UP(high) AND MATZUK_SPERMATOCYTE(high) AND PURBEY_TARGETS_OF_CTBP1_AND_SATB1_UP(high) AND MYLLYKANGAS_AMPLIFICATION_HOT_SPOT_15(high) THEN G3	4	0.96899	31	1.248465444848e-09
IF SHEPARD_BMYB_MORPHOLINO_DN(high) AND MYLLYKANGAS_AMPLIFICATION_HOT_SPOT_15(high) THEN G3	2	0.8723	41	1.77677891891264e-09
IF MATHEW_FANCONI_ANEMIA_GENES(high) AND MYLLYKANGAS_AMPLIFICATION_HOT_SPOT_15(high) THEN G3	2	0.83636	46	1.77677891891264e-09
IF POMEROY_MEDULLOBLASTOMA_PROGNOSIS_DN(high) AND ZAMORA_NOS2_TARGETS_UP(high) AND MYLLYKANGAS_AMPLIFICATION_HOT_SPOT_15(high) THEN G3	3	0.94286	33	1.77677891891264e-09
IF MATZUK_SPERMATOCYTE(high) AND MYLLYKANGAS_AMPLIFICATION_HOT_SPOT_15(high) AND NAKAYAMA_SOFT_TISSUE_TUMORS_PCA2_UP(high) THEN G3	3	1	27	2.48451015939149e-09
IF MATZUK_SPERMATOCYTE(high) AND SHEPARD_BMYB_MORPHOLINO_DN(high) AND MYLLYKANGAS_AMPLIFICATION_HOT_SPOT_15(high) THEN G3	3	0.96774	30	2.52589907738421e-09
IF KRIEG_HYPOXIA_NOT_VIA_KDM3A(high) AND LI_WILMS_TUMOR_VS_FETAL_KIDNEY_2_UP(high) THEN G3	2	0.83333	45	3.50757810097601e-09
IF SHEPARD_BMYB_MORPHOLINO_DN(high) AND PURBEY_TARGETS_OF_CTBP1_AND_SATB1_UP(high) THEN G3	2	0.9	36	4.74369576705422e-09
IF HESS_TARGETS_OF_HOXA9_AND_MEIS1_UP(high) AND POMEROY_MEDULLOBLASTOMA_PROGNOSIS_DN(high) AND MATHEW_FANCONI_ANEMIA_GENES(high) AND KRIEG_HYPOXIA_NOT_VIA_KDM3A(high) THEN G3	4	1	26	5.31765528637617e-09
IF SHEPARD_BMYB_MORPHOLINO_DN(high) AND HOLLERN_SOLID_NODULAR_BREAST_TUMOR_UP(medium) AND NAKAYAMA_SOFT_TISSUE_TUMORS_PCA2_UP(high) THEN G3	3	0.98276	26	5.31765528637617e-09
IF MATZUK_SPERMATOCYTE(high) AND PURBEY_TARGETS_OF_CTBP1_AND_SATB1_UP(high) AND MYLLYKANGAS_AMPLIFICATION_HOT_SPOT_15(high) THEN G3	3	0.91667	33	1.01881079421111e-08
IF HESS_TARGETS_OF_HOXA9_AND_MEIS1_UP(high) AND PURBEY_TARGETS_OF_CTBP1_AND_SATB1_UP(high) AND KRIEG_HYPOXIA_NOT_VIA_KDM3A(high) AND MYLLYKANGAS_AMPLIFICATION_HOT_SPOT_15(high) THEN G3	4	1	25	1.29485611482581e-08
IF MATZUK_SPERMATOCYTE(high) AND KRIEG_HYPOXIA_NOT_VIA_KDM3A(high) THEN G3	2	0.85811	40	1.30379605730895e-08
IF MYLLYKANGAS_AMPLIFICATION_HOT_SPOT_15(high) AND LI_WILMS_TUMOR_VS_FETAL_KIDNEY_2_UP(high) THEN G3	2	0.85894	38	1.6494665043621e-08
IF KRIEG_HYPOXIA_NOT_VIA_KDM3A(high) AND HOLLERN_SOLID_NODULAR_BREAST_TUMOR_UP(medium) AND NAKAYAMA_SOFT_TISSUE_TUMORS_PCA2_UP(high) THEN G3	3	0.9876	24	2.9632912981336e-08
IF HESS_TARGETS_OF_HOXA9_AND_MEIS1_UP(high) AND MATZUK_SPERMATOCYTE(high) AND SHEPARD_BMYB_MORPHOLINO_DN(high) AND MYLLYKANGAS_AMPLIFICATION_HOT_SPOT_15(high) THEN G3	4	0.97436	27	2.9632912981336e-08
IF MEBARKI_HCC_PROGENITOR_FZD8CRD_UP(low) AND KRIEG_HYPOXIA_NOT_VIA_KDM3A(low) THEN G2	2	0.84261	40	4.46161847204883e-08
IF SHEPARD_BMYB_MORPHOLINO_DN(high) AND HOLLERN_SOLID_NODULAR_BREAST_TUMOR_UP(medium) THEN G3	2	0.89189	33	4.82295390764218e-08
IF PURBEY_TARGETS_OF_CTBP1_AND_SATB1_UP(high) AND KRIEG_HYPOXIA_NOT_VIA_KDM3A(high) THEN G3	2	0.84608	38	5.8828171508963e-08
IF MATHEW_FANCONI_ANEMIA_GENES(low) AND MEBARKI_HCC_PROGENITOR_FZD8CRD_UP(low) AND KRIEG_HYPOXIA_NOT_VIA_KDM3A(low) THEN G2	3	0.96296	26	6.63629970971984e-08
IF HESS_TARGETS_OF_HOXA9_AND_MEIS1_UP(high) AND MATZUK_SPERMATOCYTE(high) AND MYLLYKANGAS_AMPLIFICATION_HOT_SPOT_15(high) AND LI_WILMS_TUMOR_VS_FETAL_KIDNEY_2_UP(high) THEN G3	4	1	23	6.67305234614187e-08
IF ZAMORA_NOS2_TARGETS_UP(high) AND HOLLERN_SOLID_NODULAR_BREAST_TUMOR_UP(medium) AND NAKAYAMA_SOFT_TISSUE_TUMORS_PCA2_UP(high) THEN G3	3	1	22	1.63695458751418e-07
IF SHEPARD_BMYB_MORPHOLINO_DN(high) AND KRIEG_HYPOXIA_NOT_VIA_KDM3A(high) AND HOLLERN_SOLID_NODULAR_BREAST_TUMOR_UP(medium) THEN G3	3	1	22	1.63695458751418e-07
IF HOLLERN_SOLID_NODULAR_BREAST_TUMOR_UP(medium) AND NAKAYAMA_SOFT_TISSUE_TUMORS_PCA2_UP(high) THEN G3	2	0.8843	31	2.32778406828264e-07
IF HESS_TARGETS_OF_HOXA9_AND_MEIS1_UP(high) AND KRIEG_HYPOXIA_NOT_VIA_KDM3A(high) THEN G3	2	0.8125	39	2.83250588139573e-07
IF MATZUK_SPERMATOCYTE(high) AND POMEROY_MEDULLOBLASTOMA_PROGNOSIS_DN(high) AND PURBEY_TARGETS_OF_CTBP1_AND_SATB1_UP(high) AND HOLLERN_SOLID_NODULAR_BREAST_TUMOR_UP(low) THEN G3	4	1	21	3.91563888043258e-07
IF KRIEG_HYPOXIA_NOT_VIA_KDM3A(low) AND NAKAYAMA_SOFT_TISSUE_TUMORS_PCA2_UP(low) THEN G2	2	0.82157	37	3.99305673122656e-07
IF SHEPARD_BMYB_MORPHOLINO_DN(high) AND MYLLYKANGAS_AMPLIFICATION_HOT_SPOT_15(high) AND LI_WILMS_TUMOR_VS_FETAL_KIDNEY_2_UP(high) THEN G3	3	0.92857	26	4.72868605810197e-07
IF MATZUK_SPERMATOCYTE(high) AND MYLLYKANGAS_AMPLIFICATION_HOT_SPOT_15(high) AND LI_WILMS_TUMOR_VS_FETAL_KIDNEY_2_UP(high) THEN G3	3	0.92857	26	4.72868605810197e-07
IF MEBARKI_HCC_PROGENITOR_FZD8CRD_UP(low) AND MYLLYKANGAS_AMPLIFICATION_HOT_SPOT_15(low) THEN G2	2	0.80462	36	7.96584809895356e-07
IF POMEROY_MEDULLOBLASTOMA_PROGNOSIS_DN(high) AND MATHEW_FANCONI_ANEMIA_GENES(high) AND PURBEY_TARGETS_OF_CTBP1_AND_SATB1_UP(high) AND HOLLERN_SOLID_NODULAR_BREAST_TUMOR_UP(low) THEN G3	4	0.95833	23	7.96584809895356e-07
IF POMEROY_MEDULLOBLASTOMA_PROGNOSIS_DN(high) AND PURBEY_TARGETS_OF_CTBP1_AND_SATB1_UP(high) AND HOLLERN_SOLID_NODULAR_BREAST_TUMOR_UP(low) THEN G3	3	0.95833	23	7.96584809895356e-07
IF SHEPARD_BMYB_MORPHOLINO_DN(high) AND HOLLERN_SOLID_NODULAR_BREAST_TUMOR_UP(medium) AND LI_WILMS_TUMOR_VS_FETAL_KIDNEY_2_UP(high) THEN G3	3	0.9877	20	8.29173165727786e-07
IF HESS_TARGETS_OF_HOXA9_AND_MEIS1_UP(high) AND ZAMORA_NOS2_TARGETS_UP(high) AND MYLLYKANGAS_AMPLIFICATION_HOT_SPOT_15(high) AND HOLLERN_SOLID_NODULAR_BREAST_TUMOR_UP(low) THEN G3	4	1	20	8.29173165727786e-07
IF MATZUK_SPERMATOCYTE(low) AND MYLLYKANGAS_AMPLIFICATION_HOT_SPOT_15(low) AND LI_WILMS_TUMOR_VS_FETAL_KIDNEY_2_UP(low) THEN G2	3	0.95455	20	8.29173165727786e-07
IF ZAMORA_NOS2_TARGETS_UP(low) AND NAKAYAMA_SOFT_TISSUE_TUMORS_PCA2_UP(low) AND ZHOU_CELL_CYCLE_GENES_IN_IR_RESPONSE_2HR(low) THEN G2	3	0.92593	25	9.93460074972892e-07
IF KRIEG_HYPOXIA_NOT_VIA_KDM3A(high) AND HOLLERN_SOLID_NODULAR_BREAST_TUMOR_UP(medium) THEN G3	2	0.85142	32	1.42045485261435e-06
IF MATZUK_SPERMATOCYTE(low) AND KRIEG_HYPOXIA_NOT_VIA_KDM3A(low) AND NAKAYAMA_SOFT_TISSUE_TUMORS_PCA2_UP(low) THEN G2	3	0.92336	22	1.69309115067069e-06
IF POMEROY_MEDULLOBLASTOMA_PROGNOSIS_DN(high) AND MATHEW_FANCONI_ANEMIA_GENES(high) AND PURBEY_TARGETS_OF_CTBP1_AND_SATB1_UP(high) AND KRIEG_HYPOXIA_NOT_VIA_KDM3A(high) THEN G3	4	0.95652	22	1.69309115067069e-06
IF MYLLYKANGAS_AMPLIFICATION_HOT_SPOT_15(low) AND LI_WILMS_TUMOR_VS_FETAL_KIDNEY_2_UP(low) THEN G2	2	0.84222	33	2.17326557243555e-06
IF POMEROY_MEDULLOBLASTOMA_PROGNOSIS_DN(high) AND KRIEG_HYPOXIA_NOT_VIA_KDM3A(high) AND ZHOU_CELL_CYCLE_GENES_IN_IR_RESPONSE_2HR(high) THEN G3	3	0.89655	26	2.2917130622095e-06
IF KRIEG_HYPOXIA_NOT_VIA_KDM3A(low) AND LI_WILMS_TUMOR_VS_FETAL_KIDNEY_2_UP(low) THEN G2	2	0.80337	34	3.17398850540407e-06
IF MEBARKI_HCC_PROGENITOR_FZD8CRD_UP(high) AND HOLLERN_SOLID_NODULAR_BREAST_TUMOR_UP(medium) THEN G3	2	0.85294	29	3.75676868578868e-06
IF PURBEY_TARGETS_OF_CTBP1_AND_SATB1_UP(medium) AND MYLLYKANGAS_AMPLIFICATION_HOT_SPOT_15(low) THEN G2	2	0.80951	32	4.38544013888334e-06
IF SHEPARD_BMYB_MORPHOLINO_DN(low) AND MYLLYKANGAS_AMPLIFICATION_HOT_SPOT_15(low) THEN G2	2	0.79855	35	4.38544013888334e-06
IF ZAMORA_NOS2_TARGETS_UP(low) AND MYLLYKANGAS_AMPLIFICATION_HOT_SPOT_15(low) AND LI_WILMS_TUMOR_VS_FETAL_KIDNEY_2_UP(medium) THEN G2	3	0.94591	18	4.43342205786126e-06
IF ZAMORA_NOS2_TARGETS_UP(low) AND PURBEY_TARGETS_OF_CTBP1_AND_SATB1_UP(medium) AND MYLLYKANGAS_AMPLIFICATION_HOT_SPOT_15(low) THEN G2	3	0.98238	20	8.88612739464895e-06
IF KRIEG_HYPOXIA_NOT_VIA_KDM3A(high) AND MYLLYKANGAS_AMPLIFICATION_HOT_SPOT_15(high) AND HOLLERN_SOLID_NODULAR_BREAST_TUMOR_UP(medium) THEN G3	3	0.92718	22	1.07148128546543e-05
IF SHEPARD_BMYB_MORPHOLINO_DN(low) AND MATHEW_FANCONI_ANEMIA_GENES(low) AND NAKAYAMA_SOFT_TISSUE_TUMORS_PCA2_UP(medium) THEN G2	3	0.91667	22	1.07148128546543e-05
IF MEBARKI_HCC_PROGENITOR_FZD8CRD_UP(low) AND MYLLYKANGAS_AMPLIFICATION_HOT_SPOT_15(low) AND HOLLERN_SOLID_NODULAR_BREAST_TUMOR_UP(high) THEN G2	3	0.88889	24	1.07148128546543e-05
IF MYLLYKANGAS_AMPLIFICATION_HOT_SPOT_15(low) AND NAKAYAMA_SOFT_TISSUE_TUMORS_PCA2_UP(low) THEN G2	2	0.84074	27	1.647686516808e-05
IF MATHEW_FANCONI_ANEMIA_GENES(medium) AND NAKAYAMA_SOFT_TISSUE_TUMORS_PCA2_UP(low) THEN G2	2	0.78707	33	1.73893137029584e-05
IF KRIEG_HYPOXIA_NOT_VIA_KDM3A(low) AND MYLLYKANGAS_AMPLIFICATION_HOT_SPOT_15(low) AND NAKAYAMA_SOFT_TISSUE_TUMORS_PCA2_UP(low) THEN G2	3	0.92619	19	1.94370918822669e-05
IF HESS_TARGETS_OF_HOXA9_AND_MEIS1_UP(medium) AND KRIEG_HYPOXIA_NOT_VIA_KDM3A(low) AND MYLLYKANGAS_AMPLIFICATION_HOT_SPOT_15(low) THEN G2	3	0.95	19	1.94370918822669e-05
IF POMEROY_MEDULLOBLASTOMA_PROGNOSIS_DN(medium) AND NAKAYAMA_SOFT_TISSUE_TUMORS_PCA2_UP(high) THEN G3	2	0.87272	23	2.28846928365316e-05
IF MYLLYKANGAS_AMPLIFICATION_HOT_SPOT_15(high) AND HOLLERN_SOLID_NODULAR_BREAST_TUMOR_UP(medium) AND NAKAYAMA_SOFT_TISSUE_TUMORS_PCA2_UP(high) THEN G3	3	0.9974	16	2.34325646597108e-05
IF HOLLERN_SOLID_NODULAR_BREAST_TUMOR_UP(medium) AND LI_WILMS_TUMOR_VS_FETAL_KIDNEY_2_UP(high) THEN G3	2	0.82483	28	2.34325646597108e-05
IF ZAMORA_NOS2_TARGETS_UP(low) AND PURBEY_TARGETS_OF_CTBP1_AND_SATB1_UP(medium) THEN G2	2	0.80088	31	2.34325646597108e-05
IF ZAMORA_NOS2_TARGETS_UP(high) AND HOLLERN_SOLID_NODULAR_BREAST_TUMOR_UP(medium) THEN G3	2	0.81176	28	2.34325646597108e-05
IF HESS_TARGETS_OF_HOXA9_AND_MEIS1_UP(medium) AND ZERBINI_RESPONSE_TO_SULINDAC_DN(medium) AND MYLLYKANGAS_AMPLIFICATION_HOT_SPOT_15(low) THEN G2	3	0.96667	16	2.34325646597108e-05
IF MATHEW_FANCONI_ANEMIA_GENES(high) AND KRIEG_HYPOXIA_NOT_VIA_KDM3A(high) AND HOLLERN_SOLID_NODULAR_BREAST_TUMOR_UP(medium) THEN G3	3	1	16	2.34325646597108e-05
IF MYLLYKANGAS_AMPLIFICATION_HOT_SPOT_15(high) AND HOLLERN_SOLID_NODULAR_BREAST_TUMOR_UP(medium) THEN G3	2	0.81667	29	3.43075245604005e-05
IF POMEROY_MEDULLOBLASTOMA_PROGNOSIS_DN(medium) AND KRIEG_HYPOXIA_NOT_VIA_KDM3A(high) AND NAKAYAMA_SOFT_TISSUE_TUMORS_PCA2_UP(high) THEN G3	3	1	15	5.3837257675092e-05
IF POMEROY_MEDULLOBLASTOMA_PROGNOSIS_DN(medium) AND KRIEG_HYPOXIA_NOT_VIA_KDM3A(high) AND LI_WILMS_TUMOR_VS_FETAL_KIDNEY_2_UP(high) THEN G3	3	0.95833	15	5.3837257675092e-05
IF SHEPARD_BMYB_MORPHOLINO_DN(low) AND ZAMORA_NOS2_TARGETS_UP(low) AND MYLLYKANGAS_AMPLIFICATION_HOT_SPOT_15(low) AND LI_WILMS_TUMOR_VS_FETAL_KIDNEY_2_UP(medium) THEN G2	4	1	15	5.3837257675092e-05
IF POMEROY_MEDULLOBLASTOMA_PROGNOSIS_DN(medium) AND NAKAYAMA_SOFT_TISSUE_TUMORS_PCA2_UP(high) AND LI_WILMS_TUMOR_VS_FETAL_KIDNEY_2_UP(high) THEN G3	3	1	15	5.3837257675092e-05
IF POMEROY_MEDULLOBLASTOMA_PROGNOSIS_DN(medium) AND KRIEG_HYPOXIA_NOT_VIA_KDM3A(high) THEN G3	2	0.81588	25	6.38080690487334e-05
IF PURBEY_TARGETS_OF_CTBP1_AND_SATB1_UP(medium) AND KRIEG_HYPOXIA_NOT_VIA_KDM3A(low) AND ZHOU_CELL_CYCLE_GENES_IN_IR_RESPONSE_2HR(low) THEN G2	3	0.85185	23	8.22832831329273e-05
IF PURBEY_TARGETS_OF_CTBP1_AND_SATB1_UP(medium) AND MYLLYKANGAS_AMPLIFICATION_HOT_SPOT_15(low) AND NAKAYAMA_SOFT_TISSUE_TUMORS_PCA2_UP(medium) THEN G2	3	0.94444	17	8.85598076366019e-05
IF MATZUK_SPERMATOCYTE(high) AND KRIEG_HYPOXIA_NOT_VIA_KDM3A(high) AND HOLLERN_SOLID_NODULAR_BREAST_TUMOR_UP(medium) THEN G3	3	0.94737	17	8.85598076366019e-05
IF SHEPARD_BMYB_MORPHOLINO_DN(low) AND MYLLYKANGAS_AMPLIFICATION_HOT_SPOT_15(low) AND NAKAYAMA_SOFT_TISSUE_TUMORS_PCA2_UP(low) THEN G2	3	0.95413	17	8.85598076366019e-05
IF ZERBINI_RESPONSE_TO_SULINDAC_DN(medium) AND HOLLERN_SOLID_NODULAR_BREAST_TUMOR_UP(high) AND NAKAYAMA_SOFT_TISSUE_TUMORS_PCA2_UP(medium) THEN G2	3	0.94444	17	8.85598076366019e-05
IF POMEROY_MEDULLOBLASTOMA_PROGNOSIS_DN(low) AND SHEPARD_BMYB_MORPHOLINO_DN(low) AND NAKAYAMA_SOFT_TISSUE_TUMORS_PCA2_UP(medium) THEN G2	3	0.94444	17	8.85598076366019e-05
IF POMEROY_MEDULLOBLASTOMA_PROGNOSIS_DN(medium) AND KRIEG_HYPOXIA_NOT_VIA_KDM3A(low) THEN G2	2	0.82722	26	9.09817447644224e-05
IF POMEROY_MEDULLOBLASTOMA_PROGNOSIS_DN(medium) AND HOLLERN_SOLID_NODULAR_BREAST_TUMOR_UP(medium) AND NAKAYAMA_SOFT_TISSUE_TUMORS_PCA2_UP(high) THEN G3	3	0.99405	14	0.000109521872231192
IF POMEROY_MEDULLOBLASTOMA_PROGNOSIS_DN(medium) AND KRIEG_HYPOXIA_NOT_VIA_KDM3A(high) AND HOLLERN_SOLID_NODULAR_BREAST_TUMOR_UP(medium) THEN G3	3	0.96667	14	0.000109521872231192
IF MEBARKI_HCC_PROGENITOR_FZD8CRD_UP(low) AND KRIEG_HYPOXIA_NOT_VIA_KDM3A(low) AND LI_WILMS_TUMOR_VS_FETAL_KIDNEY_2_UP(medium) THEN G2	3	0.95353	14	0.000109521872231192
IF POMEROY_MEDULLOBLASTOMA_PROGNOSIS_DN(high) AND KRIEG_HYPOXIA_NOT_VIA_KDM3A(high) AND HOLLERN_SOLID_NODULAR_BREAST_TUMOR_UP(medium) THEN G3	3	0.98667	14	0.000109521872231192
IF MYLLYKANGAS_AMPLIFICATION_HOT_SPOT_15(medium) AND HOLLERN_SOLID_NODULAR_BREAST_TUMOR_UP(medium) AND NAKAYAMA_SOFT_TISSUE_TUMORS_PCA2_UP(low) THEN G2	3	0.93077	14	0.000109521872231192
IF KRIEG_HYPOXIA_NOT_VIA_KDM3A(high) AND HOLLERN_SOLID_NODULAR_BREAST_TUMOR_UP(low) THEN G3	2	0.78224	30	0.000109521872231192
IF HESS_TARGETS_OF_HOXA9_AND_MEIS1_UP(high) AND HOLLERN_SOLID_NODULAR_BREAST_TUMOR_UP(medium) AND NAKAYAMA_SOFT_TISSUE_TUMORS_PCA2_UP(high) THEN G3	3	0.93029	14	0.000109521872231192
IF PURBEY_TARGETS_OF_CTBP1_AND_SATB1_UP(high) AND HOLLERN_SOLID_NODULAR_BREAST_TUMOR_UP(medium) AND NAKAYAMA_SOFT_TISSUE_TUMORS_PCA2_UP(high) THEN G3	3	1	14	0.000109521872231192
IF HESS_TARGETS_OF_HOXA9_AND_MEIS1_UP(medium) AND MYLLYKANGAS_AMPLIFICATION_HOT_SPOT_15(low) THEN G2	2	0.76923	30	0.000109521872231192
IF MYLLYKANGAS_AMPLIFICATION_HOT_SPOT_15(high) AND HOLLERN_SOLID_NODULAR_BREAST_TUMOR_UP(medium) AND ZHOU_CELL_CYCLE_GENES_IN_IR_RESPONSE_2HR(high) THEN G3	3	0.96429	14	0.000109521872231192
IF MATZUK_SPERMATOCYTE(medium) AND ZHOU_CELL_CYCLE_GENES_IN_IR_RESPONSE_2HR(low) AND LI_WILMS_TUMOR_VS_FETAL_KIDNEY_2_UP(low) THEN G2	3	0.93029	14	0.000109521872231192
IF ZERBINI_RESPONSE_TO_SULINDAC_DN(medium) AND ZHOU_CELL_CYCLE_GENES_IN_IR_RESPONSE_2HR(low) THEN G2	2	0.7561	31	0.000129694515571191
IF MATZUK_SPERMATOCYTE(medium) AND KRIEG_HYPOXIA_NOT_VIA_KDM3A(medium) THEN G2	2	0.75226	28	0.000156036729648651
IF POMEROY_MEDULLOBLASTOMA_PROGNOSIS_DN(medium) AND LI_WILMS_TUMOR_VS_FETAL_KIDNEY_2_UP(low) THEN G2	2	0.78766	25	0.000162909877396289
IF PURBEY_TARGETS_OF_CTBP1_AND_SATB1_UP(low) AND KRIEG_HYPOXIA_NOT_VIA_KDM3A(low) THEN G2	2	0.7998	25	0.000162909877396289
IF MEBARKI_HCC_PROGENITOR_FZD8CRD_UP(medium) AND HOLLERN_SOLID_NODULAR_BREAST_TUMOR_UP(medium) THEN G2	2	0.80645	25	0.000162909877396289
IF KRIEG_HYPOXIA_NOT_VIA_KDM3A(low) AND MYLLYKANGAS_AMPLIFICATION_HOT_SPOT_15(low) AND ZHOU_CELL_CYCLE_GENES_IN_IR_RESPONSE_2HR(medium) THEN G2	3	0.93708	16	0.000172378649934357
IF PURBEY_TARGETS_OF_CTBP1_AND_SATB1_UP(medium) AND ZERBINI_RESPONSE_TO_SULINDAC_DN(low) AND MYLLYKANGAS_AMPLIFICATION_HOT_SPOT_15(low) THEN G2	3	0.97059	16	0.000172378649934357
IF SHEPARD_BMYB_MORPHOLINO_DN(medium) AND MYLLYKANGAS_AMPLIFICATION_HOT_SPOT_15(low) AND LI_WILMS_TUMOR_VS_FETAL_KIDNEY_2_UP(low) THEN G2	3	0.90972	16	0.000172378649934357
IF HOLLERN_SOLID_NODULAR_BREAST_TUMOR_UP(medium) AND LI_WILMS_TUMOR_VS_FETAL_KIDNEY_2_UP(low) THEN G2	2	0.76351	29	0.000180570174685305
IF MEBARKI_HCC_PROGENITOR_FZD8CRD_UP(low) AND PURBEY_TARGETS_OF_CTBP1_AND_SATB1_UP(medium) AND KRIEG_HYPOXIA_NOT_VIA_KDM3A(low) THEN G2	3	0.89906	18	0.000180570174685305
IF MATZUK_SPERMATOCYTE(low) AND ZAMORA_NOS2_TARGETS_UP(low) AND PURBEY_TARGETS_OF_CTBP1_AND_SATB1_UP(medium) THEN G2	3	0.91084	18	0.000180570174685305
IF HESS_TARGETS_OF_HOXA9_AND_MEIS1_UP(low) AND NAKAYAMA_SOFT_TISSUE_TUMORS_PCA2_UP(low) THEN G2	2	0.7625	29	0.000180570174685305
IF ZERBINI_RESPONSE_TO_SULINDAC_DN(medium) AND NAKAYAMA_SOFT_TISSUE_TUMORS_PCA2_UP(low) THEN G2	2	0.7545	29	0.000180570174685305
IF SHEPARD_BMYB_MORPHOLINO_DN(low) AND PURBEY_TARGETS_OF_CTBP1_AND_SATB1_UP(medium) THEN G2	2	0.76316	29	0.000180570174685305
IF MATZUK_SPERMATOCYTE(high) AND HOLLERN_SOLID_NODULAR_BREAST_TUMOR_UP(medium) AND NAKAYAMA_SOFT_TISSUE_TUMORS_PCA2_UP(high) THEN G3	3	0.875	18	0.000180570174685305
IF ZERBINI_RESPONSE_TO_SULINDAC_DN(high) AND HOLLERN_SOLID_NODULAR_BREAST_TUMOR_UP(medium) THEN G3	2	0.78785	26	0.000203150906616267
IF POMEROY_MEDULLOBLASTOMA_PROGNOSIS_DN(medium) AND NAKAYAMA_SOFT_TISSUE_TUMORS_PCA2_UP(low) THEN G2	2	0.77989	26	0.000203150906616267
IF MATZUK_SPERMATOCYTE(medium) AND SHEPARD_BMYB_MORPHOLINO_DN(low) THEN G2	2	0.78788	26	0.000203150906616267
IF MEBARKI_HCC_PROGENITOR_FZD8CRD_UP(low) AND LI_WILMS_TUMOR_VS_FETAL_KIDNEY_2_UP(medium) THEN G2	2	0.78788	26	0.000203150906616267
IF HOLLERN_SOLID_NODULAR_BREAST_TUMOR_UP(medium) AND NAKAYAMA_SOFT_TISSUE_TUMORS_PCA2_UP(low) THEN G2	2	0.75534	30	0.000217281386988867
IF PURBEY_TARGETS_OF_CTBP1_AND_SATB1_UP(medium) AND KRIEG_HYPOXIA_NOT_VIA_KDM3A(high) AND HOLLERN_SOLID_NODULAR_BREAST_TUMOR_UP(medium) THEN G3	3	1	13	0.000219054871906857
IF POMEROY_MEDULLOBLASTOMA_PROGNOSIS_DN(medium) AND MEBARKI_HCC_PROGENITOR_FZD8CRD_UP(high) AND KRIEG_HYPOXIA_NOT_VIA_KDM3A(high) THEN G3	3	1	13	0.000219054871906857
IF SHEPARD_BMYB_MORPHOLINO_DN(high) AND PURBEY_TARGETS_OF_CTBP1_AND_SATB1_UP(medium) AND KRIEG_HYPOXIA_NOT_VIA_KDM3A(high) THEN G3	3	1	13	0.000219054871906857
IF POMEROY_MEDULLOBLASTOMA_PROGNOSIS_DN(medium) AND SHEPARD_BMYB_MORPHOLINO_DN(high) AND HOLLERN_SOLID_NODULAR_BREAST_TUMOR_UP(medium) THEN G3	3	1	13	0.000219054871906857
IF POMEROY_MEDULLOBLASTOMA_PROGNOSIS_DN(medium) AND ZAMORA_NOS2_TARGETS_UP(medium) AND LI_WILMS_TUMOR_VS_FETAL_KIDNEY_2_UP(low) THEN G2	3	1	13	0.000219054871906857
IF MYLLYKANGAS_AMPLIFICATION_HOT_SPOT_15(medium) AND LI_WILMS_TUMOR_VS_FETAL_KIDNEY_2_UP(high) THEN G3	2	0.8	24	0.000283539398015225
IF MATZUK_SPERMATOCYTE(high) AND HOLLERN_SOLID_NODULAR_BREAST_TUMOR_UP(medium) AND LI_WILMS_TUMOR_VS_FETAL_KIDNEY_2_UP(high) THEN G3	3	0.93726	15	0.00032456271130904
IF POMEROY_MEDULLOBLASTOMA_PROGNOSIS_DN(medium) AND HOLLERN_SOLID_NODULAR_BREAST_TUMOR_UP(medium) AND LI_WILMS_TUMOR_VS_FETAL_KIDNEY_2_UP(low) THEN G2	3	0.94134	15	0.00032456271130904
IF POMEROY_MEDULLOBLASTOMA_PROGNOSIS_DN(medium) AND ZAMORA_NOS2_TARGETS_UP(low) AND ZERBINI_RESPONSE_TO_SULINDAC_DN(medium) THEN G2	3	0.9375	15	0.00032456271130904
IF POMEROY_MEDULLOBLASTOMA_PROGNOSIS_DN(medium) AND MEBARKI_HCC_PROGENITOR_FZD8CRD_UP(medium) AND KRIEG_HYPOXIA_NOT_VIA_KDM3A(low) THEN G2	3	0.9375	15	0.00032456271130904
IF SHEPARD_BMYB_MORPHOLINO_DN(low) AND NAKAYAMA_SOFT_TISSUE_TUMORS_PCA2_UP(medium) AND LI_WILMS_TUMOR_VS_FETAL_KIDNEY_2_UP(medium) THEN G2	3	0.9375	15	0.00032456271130904
IF PURBEY_TARGETS_OF_CTBP1_AND_SATB1_UP(medium) AND KRIEG_HYPOXIA_NOT_VIA_KDM3A(low) AND NAKAYAMA_SOFT_TISSUE_TUMORS_PCA2_UP(low) THEN G2	3	0.93777	15	0.00032456271130904
IF MYLLYKANGAS_AMPLIFICATION_HOT_SPOT_15(medium) AND NAKAYAMA_SOFT_TISSUE_TUMORS_PCA2_UP(low) THEN G2	2	0.755	28	0.00032456271130904
IF HESS_TARGETS_OF_HOXA9_AND_MEIS1_UP(medium) AND SHEPARD_BMYB_MORPHOLINO_DN(medium) AND MYLLYKANGAS_AMPLIFICATION_HOT_SPOT_15(low) THEN G2	3	0.9375	15	0.00032456271130904
IF MATZUK_SPERMATOCYTE(low) AND SHEPARD_BMYB_MORPHOLINO_DN(low) AND ZERBINI_RESPONSE_TO_SULINDAC_DN(medium) THEN G2	3	0.9375	15	0.00032456271130904
IF HOLLERN_SOLID_NODULAR_BREAST_TUMOR_UP(medium) AND ZHOU_CELL_CYCLE_GENES_IN_IR_RESPONSE_2HR(high) AND LI_WILMS_TUMOR_VS_FETAL_KIDNEY_2_UP(high) THEN G3	3	0.9375	15	0.00032456271130904
IF MATZUK_SPERMATOCYTE(low) AND MYLLYKANGAS_AMPLIFICATION_HOT_SPOT_15(low) AND NAKAYAMA_SOFT_TISSUE_TUMORS_PCA2_UP(low) THEN G2	3	0.9143	17	0.000327138592266498
IF MATZUK_SPERMATOCYTE(medium) AND KRIEG_HYPOXIA_NOT_VIA_KDM3A(high) AND ZHOU_CELL_CYCLE_GENES_IN_IR_RESPONSE_2HR(medium) THEN G3	3	0.89474	17	0.000327138592266498
IF PURBEY_TARGETS_OF_CTBP1_AND_SATB1_UP(low) AND KRIEG_HYPOXIA_NOT_VIA_KDM3A(low) AND LI_WILMS_TUMOR_VS_FETAL_KIDNEY_2_UP(low) THEN G2	3	0.89474	17	0.000327138592266498
IF ZERBINI_RESPONSE_TO_SULINDAC_DN(medium) AND MYLLYKANGAS_AMPLIFICATION_HOT_SPOT_15(low) AND NAKAYAMA_SOFT_TISSUE_TUMORS_PCA2_UP(medium) THEN G2	3	0.89474	17	0.000327138592266498
IF PURBEY_TARGETS_OF_CTBP1_AND_SATB1_UP(medium) AND KRIEG_HYPOXIA_NOT_VIA_KDM3A(low) AND LI_WILMS_TUMOR_VS_FETAL_KIDNEY_2_UP(low) THEN G2	3	0.89474	17	0.000327138592266498
IF SHEPARD_BMYB_MORPHOLINO_DN(high) AND MYLLYKANGAS_AMPLIFICATION_HOT_SPOT_15(high) AND HOLLERN_SOLID_NODULAR_BREAST_TUMOR_UP(medium) THEN G3	3	0.89474	17	0.000327138592266498
IF ZAMORA_NOS2_TARGETS_UP(low) AND MYLLYKANGAS_AMPLIFICATION_HOT_SPOT_15(low) AND NAKAYAMA_SOFT_TISSUE_TUMORS_PCA2_UP(low) THEN G2	3	0.89474	17	0.000327138592266498
IF MYLLYKANGAS_AMPLIFICATION_HOT_SPOT_15(low) AND ZHOU_CELL_CYCLE_GENES_IN_IR_RESPONSE_2HR(medium) THEN G2	2	0.77754	25	0.000340932896856981
IF HESS_TARGETS_OF_HOXA9_AND_MEIS1_UP(medium) AND KRIEG_HYPOXIA_NOT_VIA_KDM3A(low) THEN G2	2	0.78085	25	0.000340932896856981
IF POMEROY_MEDULLOBLASTOMA_PROGNOSIS_DN(low) AND NAKAYAMA_SOFT_TISSUE_TUMORS_PCA2_UP(medium) THEN G2	2	0.7549	26	0.00044416843869003
IF ZERBINI_RESPONSE_TO_SULINDAC_DN(medium) AND NAKAYAMA_SOFT_TISSUE_TUMORS_PCA2_UP(medium) AND LI_WILMS_TUMOR_VS_FETAL_KIDNEY_2_UP(low) THEN G2	3	0.93816	12	0.000445257564075689
IF MATZUK_SPERMATOCYTE(high) AND POMEROY_MEDULLOBLASTOMA_PROGNOSIS_DN(medium) AND NAKAYAMA_SOFT_TISSUE_TUMORS_PCA2_UP(high) THEN G3	3	0.91987	12	0.000445257564075689
IF POMEROY_MEDULLOBLASTOMA_PROGNOSIS_DN(medium) AND PURBEY_TARGETS_OF_CTBP1_AND_SATB1_UP(high) AND KRIEG_HYPOXIA_NOT_VIA_KDM3A(high) THEN G3	3	0.95833	12	0.000445257564075689
IF HESS_TARGETS_OF_HOXA9_AND_MEIS1_UP(high) AND ZERBINI_RESPONSE_TO_SULINDAC_DN(medium) AND MYLLYKANGAS_AMPLIFICATION_HOT_SPOT_15(high) THEN G3	3	1	12	0.000445257564075689
IF PURBEY_TARGETS_OF_CTBP1_AND_SATB1_UP(medium) AND KRIEG_HYPOXIA_NOT_VIA_KDM3A(high) AND LI_WILMS_TUMOR_VS_FETAL_KIDNEY_2_UP(high) THEN G3	3	0.97897	12	0.000445257564075689
IF MYLLYKANGAS_AMPLIFICATION_HOT_SPOT_15(low) AND ZHOU_CELL_CYCLE_GENES_IN_IR_RESPONSE_2HR(medium) AND LI_WILMS_TUMOR_VS_FETAL_KIDNEY_2_UP(low) THEN G2	3	0.96154	12	0.000445257564075689
IF ZAMORA_NOS2_TARGETS_UP(high) AND PURBEY_TARGETS_OF_CTBP1_AND_SATB1_UP(medium) AND KRIEG_HYPOXIA_NOT_VIA_KDM3A(high) THEN G3	3	1	12	0.000445257564075689
IF MATZUK_SPERMATOCYTE(medium) AND NAKAYAMA_SOFT_TISSUE_TUMORS_PCA2_UP(high) THEN G3	2	0.80938	20	0.000455375465580982
IF ZERBINI_RESPONSE_TO_SULINDAC_DN(medium) AND LI_WILMS_TUMOR_VS_FETAL_KIDNEY_2_UP(low) THEN G2	2	0.75837	27	0.00052700372076602
IF NAKAYAMA_SOFT_TISSUE_TUMORS_PCA2_UP(medium) AND LI_WILMS_TUMOR_VS_FETAL_KIDNEY_2_UP(low) THEN G2	2	0.77489	24	0.0005809337061775
IF MEBARKI_HCC_PROGENITOR_FZD8CRD_UP(low) AND PURBEY_TARGETS_OF_CTBP1_AND_SATB1_UP(medium) AND MYLLYKANGAS_AMPLIFICATION_HOT_SPOT_15(low) THEN G2	3	0.95409	14	0.0005809337061775
IF MYLLYKANGAS_AMPLIFICATION_HOT_SPOT_15(low) AND HOLLERN_SOLID_NODULAR_BREAST_TUMOR_UP(medium) AND ZHOU_CELL_CYCLE_GENES_IN_IR_RESPONSE_2HR(medium) THEN G2	3	0.93333	14	0.0005809337061775
IF PURBEY_TARGETS_OF_CTBP1_AND_SATB1_UP(medium) AND MYLLYKANGAS_AMPLIFICATION_HOT_SPOT_15(low) AND LI_WILMS_TUMOR_VS_FETAL_KIDNEY_2_UP(low) THEN G2	3	0.97374	14	0.0005809337061775
IF MATZUK_SPERMATOCYTE(medium) AND POMEROY_MEDULLOBLASTOMA_PROGNOSIS_DN(low) AND MATHEW_FANCONI_ANEMIA_GENES(medium) THEN G2	3	0.90175	14	0.0005809337061775
IF MATZUK_SPERMATOCYTE(high) AND MYLLYKANGAS_AMPLIFICATION_HOT_SPOT_15(high) AND HOLLERN_SOLID_NODULAR_BREAST_TUMOR_UP(medium) THEN G3	3	0.88889	16	0.0005809337061775
IF HOLLERN_SOLID_NODULAR_BREAST_TUMOR_UP(medium) AND ZHOU_CELL_CYCLE_GENES_IN_IR_RESPONSE_2HR(medium) AND LI_WILMS_TUMOR_VS_FETAL_KIDNEY_2_UP(low) THEN G2	3	0.88889	16	0.0005809337061775
IF MYLLYKANGAS_AMPLIFICATION_HOT_SPOT_15(medium) AND ZHOU_CELL_CYCLE_GENES_IN_IR_RESPONSE_2HR(low) AND LI_WILMS_TUMOR_VS_FETAL_KIDNEY_2_UP(low) THEN G2	3	0.90168	14	0.0005809337061775
IF MYLLYKANGAS_AMPLIFICATION_HOT_SPOT_15(low) AND NAKAYAMA_SOFT_TISSUE_TUMORS_PCA2_UP(low) AND ZHOU_CELL_CYCLE_GENES_IN_IR_RESPONSE_2HR(low) THEN G2	3	0.89156	16	0.0005809337061775
IF MATZUK_SPERMATOCYTE(high) AND MYLLYKANGAS_AMPLIFICATION_HOT_SPOT_15(high) AND LI_WILMS_TUMOR_VS_FETAL_KIDNEY_2_UP(medium) THEN G3	3	0.90765	14	0.0005809337061775
IF HOLLERN_SOLID_NODULAR_BREAST_TUMOR_UP(medium) AND NAKAYAMA_SOFT_TISSUE_TUMORS_PCA2_UP(low) AND ZHOU_CELL_CYCLE_GENES_IN_IR_RESPONSE_2HR(medium) THEN G2	3	0.89738	14	0.0005809337061775
IF POMEROY_MEDULLOBLASTOMA_PROGNOSIS_DN(medium) AND HOLLERN_SOLID_NODULAR_BREAST_TUMOR_UP(medium) AND NAKAYAMA_SOFT_TISSUE_TUMORS_PCA2_UP(low) THEN G2	3	0.89732	14	0.0005809337061775
IF SHEPARD_BMYB_MORPHOLINO_DN(low) AND ZAMORA_NOS2_TARGETS_UP(low) AND ZERBINI_RESPONSE_TO_SULINDAC_DN(medium) THEN G2	3	0.86176	16	0.0005809337061775
IF POMEROY_MEDULLOBLASTOMA_PROGNOSIS_DN(medium) AND SHEPARD_BMYB_MORPHOLINO_DN(low) AND KRIEG_HYPOXIA_NOT_VIA_KDM3A(low) THEN G2	3	0.85625	16	0.0005809337061775
IF POMEROY_MEDULLOBLASTOMA_PROGNOSIS_DN(low) AND ZAMORA_NOS2_TARGETS_UP(low) AND LI_WILMS_TUMOR_VS_FETAL_KIDNEY_2_UP(medium) THEN G2	3	0.88562	16	0.0005809337061775
IF POMEROY_MEDULLOBLASTOMA_PROGNOSIS_DN(low) AND NAKAYAMA_SOFT_TISSUE_TUMORS_PCA2_UP(medium) AND LI_WILMS_TUMOR_VS_FETAL_KIDNEY_2_UP(medium) THEN G2	3	0.88889	16	0.0005809337061775
IF SHEPARD_BMYB_MORPHOLINO_DN(low) AND ZERBINI_RESPONSE_TO_SULINDAC_DN(low) AND LI_WILMS_TUMOR_VS_FETAL_KIDNEY_2_UP(medium) THEN G2	3	0.88889	16	0.0005809337061775
IF MEBARKI_HCC_PROGENITOR_FZD8CRD_UP(low) AND MYLLYKANGAS_AMPLIFICATION_HOT_SPOT_15(low) AND LI_WILMS_TUMOR_VS_FETAL_KIDNEY_2_UP(medium) THEN G2	3	0.90104	14	0.0005809337061775
IF MATZUK_SPERMATOCYTE(low) AND ZAMORA_NOS2_TARGETS_UP(low) AND MYLLYKANGAS_AMPLIFICATION_HOT_SPOT_15(low) AND NAKAYAMA_SOFT_TISSUE_TUMORS_PCA2_UP(low) THEN G2	4	0.93333	14	0.0005809337061775
IF POMEROY_MEDULLOBLASTOMA_PROGNOSIS_DN(low) AND LI_WILMS_TUMOR_VS_FETAL_KIDNEY_2_UP(medium) THEN G2	2	0.77419	24	0.0005809337061775
IF POMEROY_MEDULLOBLASTOMA_PROGNOSIS_DN(medium) AND MEBARKI_HCC_PROGENITOR_FZD8CRD_UP(medium) AND LI_WILMS_TUMOR_VS_FETAL_KIDNEY_2_UP(low) THEN G2	3	0.92229	16	0.0005809337061775
IF ZAMORA_NOS2_TARGETS_UP(low) AND ZERBINI_RESPONSE_TO_SULINDAC_DN(medium) THEN G2	2	0.75704	24	0.0005809337061775
IF KRIEG_HYPOXIA_NOT_VIA_KDM3A(medium) AND HOLLERN_SOLID_NODULAR_BREAST_TUMOR_UP(medium) AND LI_WILMS_TUMOR_VS_FETAL_KIDNEY_2_UP(low) THEN G2	3	0.93333	14	0.0005809337061775
IF HESS_TARGETS_OF_HOXA9_AND_MEIS1_UP(medium) AND KRIEG_HYPOXIA_NOT_VIA_KDM3A(low) AND NAKAYAMA_SOFT_TISSUE_TUMORS_PCA2_UP(low) THEN G2	3	0.86618	16	0.0005809337061775
IF POMEROY_MEDULLOBLASTOMA_PROGNOSIS_DN(low) AND MATHEW_FANCONI_ANEMIA_GENES(medium) AND PURBEY_TARGETS_OF_CTBP1_AND_SATB1_UP(low) THEN G2	3	0.93333	14	0.0005809337061775
IF POMEROY_MEDULLOBLASTOMA_PROGNOSIS_DN(low) AND ZERBINI_RESPONSE_TO_SULINDAC_DN(low) AND NAKAYAMA_SOFT_TISSUE_TUMORS_PCA2_UP(medium) THEN G2	3	0.8655	16	0.0005809337061775
IF SHEPARD_BMYB_MORPHOLINO_DN(low) AND KRIEG_HYPOXIA_NOT_VIA_KDM3A(low) AND HOLLERN_SOLID_NODULAR_BREAST_TUMOR_UP(medium) THEN G2	3	0.93333	14	0.0005809337061775
IF MATZUK_SPERMATOCYTE(medium) AND KRIEG_HYPOXIA_NOT_VIA_KDM3A(high) THEN G3	2	0.76234	25	0.000698477143910623
IF POMEROY_MEDULLOBLASTOMA_PROGNOSIS_DN(medium) AND SHEPARD_BMYB_MORPHOLINO_DN(low) THEN G2	2	0.75758	25	0.000698477143910623
IF POMEROY_MEDULLOBLASTOMA_PROGNOSIS_DN(medium) AND ZERBINI_RESPONSE_TO_SULINDAC_DN(high) THEN G3	2	0.76522	22	0.000812156849800121
IF MATZUK_SPERMATOCYTE(medium) AND POMEROY_MEDULLOBLASTOMA_PROGNOSIS_DN(medium) AND KRIEG_HYPOXIA_NOT_VIA_KDM3A(high) THEN G3	3	0.93969	11	0.000870199853877288
IF POMEROY_MEDULLOBLASTOMA_PROGNOSIS_DN(medium) AND ZHOU_CELL_CYCLE_GENES_IN_IR_RESPONSE_2HR(low) AND LI_WILMS_TUMOR_VS_FETAL_KIDNEY_2_UP(low) THEN G2	3	0.95863	11	0.000870199853877288
IF PURBEY_TARGETS_OF_CTBP1_AND_SATB1_UP(medium) AND MYLLYKANGAS_AMPLIFICATION_HOT_SPOT_15(low) AND ZHOU_CELL_CYCLE_GENES_IN_IR_RESPONSE_2HR(medium) THEN G2	3	0.98901	11	0.000870199853877288
IF ZAMORA_NOS2_TARGETS_UP(medium) AND HOLLERN_SOLID_NODULAR_BREAST_TUMOR_UP(medium) AND LI_WILMS_TUMOR_VS_FETAL_KIDNEY_2_UP(low) THEN G2	3	1	11	0.000870199853877288
IF POMEROY_MEDULLOBLASTOMA_PROGNOSIS_DN(medium) AND MATHEW_FANCONI_ANEMIA_GENES(high) AND KRIEG_HYPOXIA_NOT_VIA_KDM3A(high) THEN G3	3	1	11	0.000870199853877288
IF POMEROY_MEDULLOBLASTOMA_PROGNOSIS_DN(medium) AND SHEPARD_BMYB_MORPHOLINO_DN(low) AND LI_WILMS_TUMOR_VS_FETAL_KIDNEY_2_UP(low) THEN G2	3	0.93059	11	0.000870199853877288
IF HESS_TARGETS_OF_HOXA9_AND_MEIS1_UP(high) AND PURBEY_TARGETS_OF_CTBP1_AND_SATB1_UP(high) AND KRIEG_HYPOXIA_NOT_VIA_KDM3A(high) AND HOLLERN_SOLID_NODULAR_BREAST_TUMOR_UP(medium) THEN G3	4	1	11	0.000870199853877288
IF ZAMORA_NOS2_TARGETS_UP(low) AND ZERBINI_RESPONSE_TO_SULINDAC_DN(low) AND MYLLYKANGAS_AMPLIFICATION_HOT_SPOT_15(low) AND LI_WILMS_TUMOR_VS_FETAL_KIDNEY_2_UP(medium) THEN G2	4	1	11	0.000870199853877288
IF MATZUK_SPERMATOCYTE(medium) AND KRIEG_HYPOXIA_NOT_VIA_KDM3A(low) AND LI_WILMS_TUMOR_VS_FETAL_KIDNEY_2_UP(medium) THEN G2	3	1	11	0.000870199853877288
IF HESS_TARGETS_OF_HOXA9_AND_MEIS1_UP(low) AND NAKAYAMA_SOFT_TISSUE_TUMORS_PCA2_UP(high) THEN G3	2	0.83317	17	0.00100029672336172
IF HESS_TARGETS_OF_HOXA9_AND_MEIS1_UP(low) AND MEBARKI_HCC_PROGENITOR_FZD8CRD_UP(low) AND PURBEY_TARGETS_OF_CTBP1_AND_SATB1_UP(medium) THEN G2	3	0.85	17	0.00100029672336172
IF POMEROY_MEDULLOBLASTOMA_PROGNOSIS_DN(high) AND HOLLERN_SOLID_NODULAR_BREAST_TUMOR_UP(medium) THEN G3	2	0.76667	23	0.00100936470717012
IF HOLLERN_SOLID_NODULAR_BREAST_TUMOR_UP(medium) AND ZHOU_CELL_CYCLE_GENES_IN_IR_RESPONSE_2HR(high) THEN G3	2	0.8	20	0.00111288524267452
IF MATZUK_SPERMATOCYTE(low) AND POMEROY_MEDULLOBLASTOMA_PROGNOSIS_DN(medium) AND KRIEG_HYPOXIA_NOT_VIA_KDM3A(low) THEN G2	3	0.89774	13	0.00111531305786225
IF POMEROY_MEDULLOBLASTOMA_PROGNOSIS_DN(medium) AND KRIEG_HYPOXIA_NOT_VIA_KDM3A(low) AND NAKAYAMA_SOFT_TISSUE_TUMORS_PCA2_UP(medium) THEN G2	3	0.9251	13	0.00111531305786225
IF PURBEY_TARGETS_OF_CTBP1_AND_SATB1_UP(high) AND KRIEG_HYPOXIA_NOT_VIA_KDM3A(high) AND HOLLERN_SOLID_NODULAR_BREAST_TUMOR_UP(medium) THEN G3	3	0.91825	13	0.00111531305786225
IF MATHEW_FANCONI_ANEMIA_GENES(low) AND KRIEG_HYPOXIA_NOT_VIA_KDM3A(low) AND NAKAYAMA_SOFT_TISSUE_TUMORS_PCA2_UP(low) THEN G2	3	0.9339	13	0.00111531305786225
IF PURBEY_TARGETS_OF_CTBP1_AND_SATB1_UP(high) AND HOLLERN_SOLID_NODULAR_BREAST_TUMOR_UP(medium) AND LI_WILMS_TUMOR_VS_FETAL_KIDNEY_2_UP(high) THEN G3	3	0.92857	13	0.00111531305786225
IF HESS_TARGETS_OF_HOXA9_AND_MEIS1_UP(high) AND KRIEG_HYPOXIA_NOT_VIA_KDM3A(high) AND HOLLERN_SOLID_NODULAR_BREAST_TUMOR_UP(medium) THEN G3	3	0.9581	13	0.00111531305786225
IF MATZUK_SPERMATOCYTE(low) AND ZAMORA_NOS2_TARGETS_UP(low) AND ZERBINI_RESPONSE_TO_SULINDAC_DN(medium) THEN G2	3	0.92857	13	0.00111531305786225
IF HESS_TARGETS_OF_HOXA9_AND_MEIS1_UP(low) AND SHEPARD_BMYB_MORPHOLINO_DN(low) AND PURBEY_TARGETS_OF_CTBP1_AND_SATB1_UP(medium) THEN G2	3	0.87831	15	0.00111531305786225
IF POMEROY_MEDULLOBLASTOMA_PROGNOSIS_DN(low) AND MYLLYKANGAS_AMPLIFICATION_HOT_SPOT_15(low) AND NAKAYAMA_SOFT_TISSUE_TUMORS_PCA2_UP(low) THEN G2	3	0.88235	15	0.00111531305786225
IF POMEROY_MEDULLOBLASTOMA_PROGNOSIS_DN(low) AND MYLLYKANGAS_AMPLIFICATION_HOT_SPOT_15(low) AND ZHOU_CELL_CYCLE_GENES_IN_IR_RESPONSE_2HR(medium) THEN G2	3	0.89183	13	0.00111531305786225
IF HESS_TARGETS_OF_HOXA9_AND_MEIS1_UP(medium) AND POMEROY_MEDULLOBLASTOMA_PROGNOSIS_DN(low) AND MYLLYKANGAS_AMPLIFICATION_HOT_SPOT_15(low) THEN G2	3	0.96154	13	0.00111531305786225
IF POMEROY_MEDULLOBLASTOMA_PROGNOSIS_DN(medium) AND MYLLYKANGAS_AMPLIFICATION_HOT_SPOT_15(medium) AND NAKAYAMA_SOFT_TISSUE_TUMORS_PCA2_UP(low) THEN G2	3	0.92857	13	0.00111531305786225
IF POMEROY_MEDULLOBLASTOMA_PROGNOSIS_DN(low) AND MEBARKI_HCC_PROGENITOR_FZD8CRD_UP(low) AND LI_WILMS_TUMOR_VS_FETAL_KIDNEY_2_UP(medium) THEN G2	3	0.88235	15	0.00111531305786225
IF SHEPARD_BMYB_MORPHOLINO_DN(low) AND PURBEY_TARGETS_OF_CTBP1_AND_SATB1_UP(low) AND KRIEG_HYPOXIA_NOT_VIA_KDM3A(low) THEN G2	3	0.92857	13	0.00111531305786225
IF POMEROY_MEDULLOBLASTOMA_PROGNOSIS_DN(low) AND MEBARKI_HCC_PROGENITOR_FZD8CRD_UP(low) AND NAKAYAMA_SOFT_TISSUE_TUMORS_PCA2_UP(medium) THEN G2	3	0.88235	15	0.00111531305786225
IF PURBEY_TARGETS_OF_CTBP1_AND_SATB1_UP(medium) AND ZERBINI_RESPONSE_TO_SULINDAC_DN(low) AND LI_WILMS_TUMOR_VS_FETAL_KIDNEY_2_UP(medium) THEN G2	3	0.92857	13	0.00111531305786225
IF MATZUK_SPERMATOCYTE(low) AND POMEROY_MEDULLOBLASTOMA_PROGNOSIS_DN(low) AND MEBARKI_HCC_PROGENITOR_FZD8CRD_UP(low) AND NAKAYAMA_SOFT_TISSUE_TUMORS_PCA2_UP(medium) THEN G2	4	0.92857	13	0.00111531305786225
IF ZAMORA_NOS2_TARGETS_UP(low) AND ZERBINI_RESPONSE_TO_SULINDAC_DN(medium) AND NAKAYAMA_SOFT_TISSUE_TUMORS_PCA2_UP(low) THEN G2	3	0.92857	13	0.00111531305786225
IF ZAMORA_NOS2_TARGETS_UP(low) AND ZERBINI_RESPONSE_TO_SULINDAC_DN(medium) AND LI_WILMS_TUMOR_VS_FETAL_KIDNEY_2_UP(low) THEN G2	3	0.92857	13	0.00111531305786225
IF KRIEG_HYPOXIA_NOT_VIA_KDM3A(low) AND HOLLERN_SOLID_NODULAR_BREAST_TUMOR_UP(medium) THEN G2	2	0.78333	21	0.00137352131050774
IF POMEROY_MEDULLOBLASTOMA_PROGNOSIS_DN(medium) AND LI_WILMS_TUMOR_VS_FETAL_KIDNEY_2_UP(high) THEN G3	2	0.79181	21	0.00137352131050774
IF MYLLYKANGAS_AMPLIFICATION_HOT_SPOT_15(high) AND ZHOU_CELL_CYCLE_GENES_IN_IR_RESPONSE_2HR(medium) THEN G3	2	0.7782	21	0.00137352131050774
IF ZAMORA_NOS2_TARGETS_UP(low) AND LI_WILMS_TUMOR_VS_FETAL_KIDNEY_2_UP(medium) THEN G2	2	0.74304	25	0.00138203599149858
IF HOLLERN_SOLID_NODULAR_BREAST_TUMOR_UP(low) AND ZHOU_CELL_CYCLE_GENES_IN_IR_RESPONSE_2HR(low) AND LI_WILMS_TUMOR_VS_FETAL_KIDNEY_2_UP(low) THEN G2	3	1	10	0.00174241077942697
IF MYLLYKANGAS_AMPLIFICATION_HOT_SPOT_15(high) AND LI_WILMS_TUMOR_VS_FETAL_KIDNEY_2_UP(medium) THEN G3	2	0.77081	22	0.00174241077942697
IF POMEROY_MEDULLOBLASTOMA_PROGNOSIS_DN(medium) AND ZAMORA_NOS2_TARGETS_UP(medium) AND KRIEG_HYPOXIA_NOT_VIA_KDM3A(low) THEN G2	3	1	10	0.00174241077942697
IF MATZUK_SPERMATOCYTE(low) AND SHEPARD_BMYB_MORPHOLINO_DN(low) AND NAKAYAMA_SOFT_TISSUE_TUMORS_PCA2_UP(medium) AND LI_WILMS_TUMOR_VS_FETAL_KIDNEY_2_UP(medium) THEN G2	4	0.90278	10	0.00174241077942697
IF ZAMORA_NOS2_TARGETS_UP(high) AND NAKAYAMA_SOFT_TISSUE_TUMORS_PCA2_UP(high) AND LI_WILMS_TUMOR_VS_FETAL_KIDNEY_2_UP(medium) THEN G3	3	0.93038	10	0.00174241077942697
IF ZAMORA_NOS2_TARGETS_UP(high) AND MATHEW_FANCONI_ANEMIA_GENES(medium) AND MYLLYKANGAS_AMPLIFICATION_HOT_SPOT_15(high) THEN G3	3	1	10	0.00174241077942697
IF MYLLYKANGAS_AMPLIFICATION_HOT_SPOT_15(high) AND NAKAYAMA_SOFT_TISSUE_TUMORS_PCA2_UP(high) AND LI_WILMS_TUMOR_VS_FETAL_KIDNEY_2_UP(medium) THEN G3	3	0.95455	10	0.00174241077942697
IF POMEROY_MEDULLOBLASTOMA_PROGNOSIS_DN(medium) AND MYLLYKANGAS_AMPLIFICATION_HOT_SPOT_15(high) AND LI_WILMS_TUMOR_VS_FETAL_KIDNEY_2_UP(high) THEN G3	3	1	10	0.00174241077942697
IF HESS_TARGETS_OF_HOXA9_AND_MEIS1_UP(low) AND MATZUK_SPERMATOCYTE(low) AND ZAMORA_NOS2_TARGETS_UP(low) AND LI_WILMS_TUMOR_VS_FETAL_KIDNEY_2_UP(medium) THEN G2	4	0.95	10	0.00174241077942697
IF PURBEY_TARGETS_OF_CTBP1_AND_SATB1_UP(medium) AND MYLLYKANGAS_AMPLIFICATION_HOT_SPOT_15(high) AND HOLLERN_SOLID_NODULAR_BREAST_TUMOR_UP(medium) THEN G3	3	1	10	0.00174241077942697
IF HESS_TARGETS_OF_HOXA9_AND_MEIS1_UP(high) AND POMEROY_MEDULLOBLASTOMA_PROGNOSIS_DN(medium) AND KRIEG_HYPOXIA_NOT_VIA_KDM3A(high) THEN G3	3	1	10	0.00174241077942697
IF HESS_TARGETS_OF_HOXA9_AND_MEIS1_UP(medium) AND PURBEY_TARGETS_OF_CTBP1_AND_SATB1_UP(medium) AND KRIEG_HYPOXIA_NOT_VIA_KDM3A(high) THEN G3	3	1	10	0.00174241077942697
IF ZAMORA_NOS2_TARGETS_UP(low) AND PURBEY_TARGETS_OF_CTBP1_AND_SATB1_UP(medium) AND MYLLYKANGAS_AMPLIFICATION_HOT_SPOT_15(low) AND LI_WILMS_TUMOR_VS_FETAL_KIDNEY_2_UP(medium) THEN G2	4	1	10	0.00174241077942697
IF POMEROY_MEDULLOBLASTOMA_PROGNOSIS_DN(low) AND MEBARKI_HCC_PROGENITOR_FZD8CRD_UP(low) AND KRIEG_HYPOXIA_NOT_VIA_KDM3A(low) AND LI_WILMS_TUMOR_VS_FETAL_KIDNEY_2_UP(medium) THEN G2	4	1	10	0.00174241077942697
IF POMEROY_MEDULLOBLASTOMA_PROGNOSIS_DN(high) AND PURBEY_TARGETS_OF_CTBP1_AND_SATB1_UP(medium) AND MYLLYKANGAS_AMPLIFICATION_HOT_SPOT_15(high) THEN G3	3	1	10	0.00174241077942697
IF ZAMORA_NOS2_TARGETS_UP(low) AND PURBEY_TARGETS_OF_CTBP1_AND_SATB1_UP(low) AND NAKAYAMA_SOFT_TISSUE_TUMORS_PCA2_UP(low) AND ZHOU_CELL_CYCLE_GENES_IN_IR_RESPONSE_2HR(low) THEN G2	4	0.9375	10	0.00174241077942697
IF MATZUK_SPERMATOCYTE(medium) AND KRIEG_HYPOXIA_NOT_VIA_KDM3A(high) AND LI_WILMS_TUMOR_VS_FETAL_KIDNEY_2_UP(medium) THEN G3	3	1	10	0.00174241077942697
IF SHEPARD_BMYB_MORPHOLINO_DN(medium) AND PURBEY_TARGETS_OF_CTBP1_AND_SATB1_UP(high) AND LI_WILMS_TUMOR_VS_FETAL_KIDNEY_2_UP(high) THEN G3	3	1	10	0.00174241077942697
IF HESS_TARGETS_OF_HOXA9_AND_MEIS1_UP(low) AND PURBEY_TARGETS_OF_CTBP1_AND_SATB1_UP(medium) AND KRIEG_HYPOXIA_NOT_VIA_KDM3A(low) THEN G2	3	0.838	16	0.00175204229027309
IF POMEROY_MEDULLOBLASTOMA_PROGNOSIS_DN(medium) AND ZAMORA_NOS2_TARGETS_UP(high) THEN G3	2	0.78492	19	0.00186184096406954
IF MATZUK_SPERMATOCYTE(medium) AND KRIEG_HYPOXIA_NOT_VIA_KDM3A(high) AND NAKAYAMA_SOFT_TISSUE_TUMORS_PCA2_UP(high) THEN G3	3	0.95833	12	0.00208649765491282
IF MYLLYKANGAS_AMPLIFICATION_HOT_SPOT_15(low) AND NAKAYAMA_SOFT_TISSUE_TUMORS_PCA2_UP(medium) AND ZHOU_CELL_CYCLE_GENES_IN_IR_RESPONSE_2HR(medium) THEN G2	3	0.92761	14	0.00208649765491282
IF POMEROY_MEDULLOBLASTOMA_PROGNOSIS_DN(medium) AND KRIEG_HYPOXIA_NOT_VIA_KDM3A(low) AND HOLLERN_SOLID_NODULAR_BREAST_TUMOR_UP(high) THEN G2	3	0.94247	12	0.00208649765491282
IF POMEROY_MEDULLOBLASTOMA_PROGNOSIS_DN(medium) AND ZERBINI_RESPONSE_TO_SULINDAC_DN(medium) AND LI_WILMS_TUMOR_VS_FETAL_KIDNEY_2_UP(low) THEN G2	3	0.89792	14	0.00208649765491282
IF MEBARKI_HCC_PROGENITOR_FZD8CRD_UP(medium) AND HOLLERN_SOLID_NODULAR_BREAST_TUMOR_UP(medium) AND NAKAYAMA_SOFT_TISSUE_TUMORS_PCA2_UP(low) THEN G2	3	0.96602	12	0.00208649765491282
IF POMEROY_MEDULLOBLASTOMA_PROGNOSIS_DN(medium) AND KRIEG_HYPOXIA_NOT_VIA_KDM3A(low) AND ZERBINI_RESPONSE_TO_SULINDAC_DN(medium) THEN G2	3	0.91363	14	0.00208649765491282
IF MATHEW_FANCONI_ANEMIA_GENES(low) AND MYLLYKANGAS_AMPLIFICATION_HOT_SPOT_15(low) AND NAKAYAMA_SOFT_TISSUE_TUMORS_PCA2_UP(low) THEN G2	3	0.88205	12	0.00208649765491282
IF POMEROY_MEDULLOBLASTOMA_PROGNOSIS_DN(medium) AND PURBEY_TARGETS_OF_CTBP1_AND_SATB1_UP(medium) AND KRIEG_HYPOXIA_NOT_VIA_KDM3A(low) THEN G2	3	0.96667	12	0.00208649765491282
IF MATHEW_FANCONI_ANEMIA_GENES(medium) AND MYLLYKANGAS_AMPLIFICATION_HOT_SPOT_15(medium) AND NAKAYAMA_SOFT_TISSUE_TUMORS_PCA2_UP(low) THEN G2	3	0.87621	14	0.00208649765491282
IF PURBEY_TARGETS_OF_CTBP1_AND_SATB1_UP(high) AND MYLLYKANGAS_AMPLIFICATION_HOT_SPOT_15(medium) AND LI_WILMS_TUMOR_VS_FETAL_KIDNEY_2_UP(high) THEN G3	3	0.92308	12	0.00208649765491282
IF POMEROY_MEDULLOBLASTOMA_PROGNOSIS_DN(low) AND PURBEY_TARGETS_OF_CTBP1_AND_SATB1_UP(medium) AND NAKAYAMA_SOFT_TISSUE_TUMORS_PCA2_UP(medium) THEN G2	3	0.88691	12	0.00208649765491282
IF MATZUK_SPERMATOCYTE(low) AND ZAMORA_NOS2_TARGETS_UP(medium) AND LI_WILMS_TUMOR_VS_FETAL_KIDNEY_2_UP(low) THEN G2	3	0.92308	12	0.00208649765491282
IF HESS_TARGETS_OF_HOXA9_AND_MEIS1_UP(medium) AND KRIEG_HYPOXIA_NOT_VIA_KDM3A(high) AND HOLLERN_SOLID_NODULAR_BREAST_TUMOR_UP(medium) THEN G3	3	0.92308	12	0.00208649765491282
IF SHEPARD_BMYB_MORPHOLINO_DN(high) AND MYLLYKANGAS_AMPLIFICATION_HOT_SPOT_15(high) AND LI_WILMS_TUMOR_VS_FETAL_KIDNEY_2_UP(medium) THEN G3	3	0.92308	12	0.00208649765491282
IF HESS_TARGETS_OF_HOXA9_AND_MEIS1_UP(low) AND MYLLYKANGAS_AMPLIFICATION_HOT_SPOT_15(low) AND NAKAYAMA_SOFT_TISSUE_TUMORS_PCA2_UP(low) THEN G2	3	0.88946	14	0.00208649765491282
IF ZAMORA_NOS2_TARGETS_UP(medium) AND KRIEG_HYPOXIA_NOT_VIA_KDM3A(low) AND LI_WILMS_TUMOR_VS_FETAL_KIDNEY_2_UP(low) THEN G2	3	0.89851	12	0.00208649765491282
IF HESS_TARGETS_OF_HOXA9_AND_MEIS1_UP(medium) AND MYLLYKANGAS_AMPLIFICATION_HOT_SPOT_15(low) AND NAKAYAMA_SOFT_TISSUE_TUMORS_PCA2_UP(medium) THEN G2	3	0.89306	14	0.00208649765491282
IF ZAMORA_NOS2_TARGETS_UP(low) AND MATHEW_FANCONI_ANEMIA_GENES(medium) AND MYLLYKANGAS_AMPLIFICATION_HOT_SPOT_15(low) THEN G2	3	0.875	14	0.00208649765491282
IF MATZUK_SPERMATOCYTE(low) AND POMEROY_MEDULLOBLASTOMA_PROGNOSIS_DN(medium) AND ZERBINI_RESPONSE_TO_SULINDAC_DN(medium) THEN G2	3	0.92308	12	0.00208649765491282
IF POMEROY_MEDULLOBLASTOMA_PROGNOSIS_DN(medium) AND ZERBINI_RESPONSE_TO_SULINDAC_DN(medium) AND ZHOU_CELL_CYCLE_GENES_IN_IR_RESPONSE_2HR(low) THEN G2	3	0.875	14	0.00208649765491282
IF SHEPARD_BMYB_MORPHOLINO_DN(low) AND PURBEY_TARGETS_OF_CTBP1_AND_SATB1_UP(medium) AND LI_WILMS_TUMOR_VS_FETAL_KIDNEY_2_UP(medium) THEN G2	3	0.90785	12	0.00208649765491282
IF MEBARKI_HCC_PROGENITOR_FZD8CRD_UP(medium) AND ZERBINI_RESPONSE_TO_SULINDAC_DN(high) AND LI_WILMS_TUMOR_VS_FETAL_KIDNEY_2_UP(high) THEN G3	3	0.92308	12	0.00208649765491282
IF MEBARKI_HCC_PROGENITOR_FZD8CRD_UP(low) AND MYLLYKANGAS_AMPLIFICATION_HOT_SPOT_15(medium) AND ZHOU_CELL_CYCLE_GENES_IN_IR_RESPONSE_2HR(low) THEN G2	3	0.875	14	0.00208649765491282
IF MATHEW_FANCONI_ANEMIA_GENES(high) AND MYLLYKANGAS_AMPLIFICATION_HOT_SPOT_15(high) AND LI_WILMS_TUMOR_VS_FETAL_KIDNEY_2_UP(medium) THEN G3	3	0.92308	12	0.00208649765491282
IF POMEROY_MEDULLOBLASTOMA_PROGNOSIS_DN(medium) AND SHEPARD_BMYB_MORPHOLINO_DN(low) AND HOLLERN_SOLID_NODULAR_BREAST_TUMOR_UP(medium) THEN G2	3	0.92308	12	0.00208649765491282
IF HESS_TARGETS_OF_HOXA9_AND_MEIS1_UP(medium) AND MYLLYKANGAS_AMPLIFICATION_HOT_SPOT_15(low) AND NAKAYAMA_SOFT_TISSUE_TUMORS_PCA2_UP(low) THEN G2	3	0.92308	12	0.00208649765491282
IF PURBEY_TARGETS_OF_CTBP1_AND_SATB1_UP(medium) AND KRIEG_HYPOXIA_NOT_VIA_KDM3A(medium) AND NAKAYAMA_SOFT_TISSUE_TUMORS_PCA2_UP(medium) THEN G2	3	0.92262	12	0.00208649765491282
IF MATHEW_FANCONI_ANEMIA_GENES(medium) AND KRIEG_HYPOXIA_NOT_VIA_KDM3A(low) THEN G2	2	0.7228	24	0.00215143233209753
IF PURBEY_TARGETS_OF_CTBP1_AND_SATB1_UP(medium) AND KRIEG_HYPOXIA_NOT_VIA_KDM3A(high) THEN G3	2	0.79117	20	0.00220483379160561
IF ZAMORA_NOS2_TARGETS_UP(medium) AND NAKAYAMA_SOFT_TISSUE_TUMORS_PCA2_UP(high) THEN G3	2	0.7742	20	0.00220483379160561
IF HESS_TARGETS_OF_HOXA9_AND_MEIS1_UP(medium) AND MYLLYKANGAS_AMPLIFICATION_HOT_SPOT_15(high) THEN G3	2	0.74596	20	0.00220483379160561
IF MATZUK_SPERMATOCYTE(low) AND SHEPARD_BMYB_MORPHOLINO_DN(low) AND PURBEY_TARGETS_OF_CTBP1_AND_SATB1_UP(medium) THEN G2	3	0.80952	17	0.00236771632343551
IF MATZUK_SPERMATOCYTE(medium) AND KRIEG_HYPOXIA_NOT_VIA_KDM3A(low) THEN G2	2	0.75395	21	0.00274844219781659
IF HESS_TARGETS_OF_HOXA9_AND_MEIS1_UP(medium) AND KRIEG_HYPOXIA_NOT_VIA_KDM3A(high) THEN G3	2	0.75063	21	0.00274844219781659
IF MATHEW_FANCONI_ANEMIA_GENES(medium) AND KRIEG_HYPOXIA_NOT_VIA_KDM3A(high) THEN G3	2	0.74102	21	0.00274844219781659
IF ZAMORA_NOS2_TARGETS_UP(low) AND HOLLERN_SOLID_NODULAR_BREAST_TUMOR_UP(medium) AND NAKAYAMA_SOFT_TISSUE_TUMORS_PCA2_UP(low) THEN G2	3	0.83333	15	0.0031792164373569
IF POMEROY_MEDULLOBLASTOMA_PROGNOSIS_DN(medium) AND ZAMORA_NOS2_TARGETS_UP(low) AND KRIEG_HYPOXIA_NOT_VIA_KDM3A(low) THEN G2	3	0.85833	15	0.0031792164373569
IF SHEPARD_BMYB_MORPHOLINO_DN(low) AND PURBEY_TARGETS_OF_CTBP1_AND_SATB1_UP(medium) AND ZERBINI_RESPONSE_TO_SULINDAC_DN(low) THEN G2	3	0.83333	15	0.0031792164373569
IF MATHEW_FANCONI_ANEMIA_GENES(low) AND PURBEY_TARGETS_OF_CTBP1_AND_SATB1_UP(medium) AND NAKAYAMA_SOFT_TISSUE_TUMORS_PCA2_UP(medium) THEN G2	3	0.83333	15	0.0031792164373569
IF MATHEW_FANCONI_ANEMIA_GENES(medium) AND NAKAYAMA_SOFT_TISSUE_TUMORS_PCA2_UP(high) THEN G3	2	0.80279	18	0.00319485710458015
IF MATHEW_FANCONI_ANEMIA_GENES(medium) AND ZERBINI_RESPONSE_TO_SULINDAC_DN(high) THEN G3	2	0.7794	18	0.00319485710458015
IF KRIEG_HYPOXIA_NOT_VIA_KDM3A(low) AND ZHOU_CELL_CYCLE_GENES_IN_IR_RESPONSE_2HR(medium) THEN G2	2	0.71635	22	0.00322918967965783
IF POMEROY_MEDULLOBLASTOMA_PROGNOSIS_DN(medium) AND MYLLYKANGAS_AMPLIFICATION_HOT_SPOT_15(high) THEN G3	2	0.7403	22	0.00322918967965783
IF PURBEY_TARGETS_OF_CTBP1_AND_SATB1_UP(medium) AND KRIEG_HYPOXIA_NOT_VIA_KDM3A(medium) THEN G2	2	0.72124	22	0.00322918967965783
IF MEBARKI_HCC_PROGENITOR_FZD8CRD_UP(medium) AND MYLLYKANGAS_AMPLIFICATION_HOT_SPOT_15(low) AND NAKAYAMA_SOFT_TISSUE_TUMORS_PCA2_UP(low) THEN G2	3	0.92818	9	0.00330126570630424
IF PURBEY_TARGETS_OF_CTBP1_AND_SATB1_UP(medium) AND KRIEG_HYPOXIA_NOT_VIA_KDM3A(low) AND HOLLERN_SOLID_NODULAR_BREAST_TUMOR_UP(medium) THEN G2	3	0.93673	9	0.00330126570630424
IF MEBARKI_HCC_PROGENITOR_FZD8CRD_UP(low) AND MYLLYKANGAS_AMPLIFICATION_HOT_SPOT_15(medium) AND HOLLERN_SOLID_NODULAR_BREAST_TUMOR_UP(medium) THEN G2	3	0.94897	9	0.00330126570630424
IF POMEROY_MEDULLOBLASTOMA_PROGNOSIS_DN(medium) AND HOLLERN_SOLID_NODULAR_BREAST_TUMOR_UP(medium) AND LI_WILMS_TUMOR_VS_FETAL_KIDNEY_2_UP(high) THEN G3	3	1	9	0.00330126570630424
IF MATHEW_FANCONI_ANEMIA_GENES(medium) AND MYLLYKANGAS_AMPLIFICATION_HOT_SPOT_15(high) AND NAKAYAMA_SOFT_TISSUE_TUMORS_PCA2_UP(high) THEN G3	3	1	9	0.00330126570630424
IF MATZUK_SPERMATOCYTE(high) AND SHEPARD_BMYB_MORPHOLINO_DN(high) AND ZERBINI_RESPONSE_TO_SULINDAC_DN(medium) THEN G3	3	0.97222	9	0.00330126570630424
IF POMEROY_MEDULLOBLASTOMA_PROGNOSIS_DN(medium) AND MYLLYKANGAS_AMPLIFICATION_HOT_SPOT_15(high) AND NAKAYAMA_SOFT_TISSUE_TUMORS_PCA2_UP(high) THEN G3	3	1	9	0.00330126570630424
IF POMEROY_MEDULLOBLASTOMA_PROGNOSIS_DN(medium) AND PURBEY_TARGETS_OF_CTBP1_AND_SATB1_UP(high) AND NAKAYAMA_SOFT_TISSUE_TUMORS_PCA2_UP(high) THEN G3	3	1	9	0.00330126570630424
IF HESS_TARGETS_OF_HOXA9_AND_MEIS1_UP(low) AND MATZUK_SPERMATOCYTE(low) AND SHEPARD_BMYB_MORPHOLINO_DN(low) AND ZAMORA_NOS2_TARGETS_UP(low) AND LI_WILMS_TUMOR_VS_FETAL_KIDNEY_2_UP(medium) THEN G2	5	1	9	0.00330126570630424
IF POMEROY_MEDULLOBLASTOMA_PROGNOSIS_DN(medium) AND MATHEW_FANCONI_ANEMIA_GENES(medium) AND ZERBINI_RESPONSE_TO_SULINDAC_DN(high) THEN G3	3	1	9	0.00330126570630424
IF ZAMORA_NOS2_TARGETS_UP(high) AND MEBARKI_HCC_PROGENITOR_FZD8CRD_UP(medium) AND MYLLYKANGAS_AMPLIFICATION_HOT_SPOT_15(high) THEN G3	3	0.9697	9	0.00330126570630424
IF MATZUK_SPERMATOCYTE(medium) AND PURBEY_TARGETS_OF_CTBP1_AND_SATB1_UP(medium) AND KRIEG_HYPOXIA_NOT_VIA_KDM3A(high) THEN G3	3	0.97599	9	0.00330126570630424
IF MATZUK_SPERMATOCYTE(high) AND NAKAYAMA_SOFT_TISSUE_TUMORS_PCA2_UP(high) AND LI_WILMS_TUMOR_VS_FETAL_KIDNEY_2_UP(medium) THEN G3	3	1	9	0.00330126570630424
IF PURBEY_TARGETS_OF_CTBP1_AND_SATB1_UP(medium) AND HOLLERN_SOLID_NODULAR_BREAST_TUMOR_UP(medium) AND NAKAYAMA_SOFT_TISSUE_TUMORS_PCA2_UP(high) THEN G3	3	1	9	0.00330126570630424
IF HESS_TARGETS_OF_HOXA9_AND_MEIS1_UP(high) AND KRIEG_HYPOXIA_NOT_VIA_KDM3A(high) AND LI_WILMS_TUMOR_VS_FETAL_KIDNEY_2_UP(medium) THEN G3	3	1	9	0.00330126570630424
IF MATZUK_SPERMATOCYTE(high) AND PURBEY_TARGETS_OF_CTBP1_AND_SATB1_UP(high) AND KRIEG_HYPOXIA_NOT_VIA_KDM3A(medium) AND HOLLERN_SOLID_NODULAR_BREAST_TUMOR_UP(low) THEN G3	4	1	9	0.00330126570630424
IF MATZUK_SPERMATOCYTE(medium) AND POMEROY_MEDULLOBLASTOMA_PROGNOSIS_DN(medium) AND KRIEG_HYPOXIA_NOT_VIA_KDM3A(low) THEN G2	3	1	9	0.00330126570630424
IF HESS_TARGETS_OF_HOXA9_AND_MEIS1_UP(medium) AND SHEPARD_BMYB_MORPHOLINO_DN(medium) AND MYLLYKANGAS_AMPLIFICATION_HOT_SPOT_15(high) THEN G3	3	0.98376	9	0.00330126570630424
IF MATZUK_SPERMATOCYTE(medium) AND POMEROY_MEDULLOBLASTOMA_PROGNOSIS_DN(medium) AND NAKAYAMA_SOFT_TISSUE_TUMORS_PCA2_UP(high) THEN G3	3	0.96481	9	0.00330126570630424
IF MYLLYKANGAS_AMPLIFICATION_HOT_SPOT_15(high) AND NAKAYAMA_SOFT_TISSUE_TUMORS_PCA2_UP(high) AND ZHOU_CELL_CYCLE_GENES_IN_IR_RESPONSE_2HR(medium) THEN G3	3	1	9	0.00330126570630424
IF MATZUK_SPERMATOCYTE(low) AND NAKAYAMA_SOFT_TISSUE_TUMORS_PCA2_UP(medium) AND LI_WILMS_TUMOR_VS_FETAL_KIDNEY_2_UP(low) THEN G2	3	1	9	0.00330126570630424
IF SHEPARD_BMYB_MORPHOLINO_DN(low) AND ZAMORA_NOS2_TARGETS_UP(low) AND PURBEY_TARGETS_OF_CTBP1_AND_SATB1_UP(medium) AND LI_WILMS_TUMOR_VS_FETAL_KIDNEY_2_UP(medium) THEN G2	4	1	9	0.00330126570630424
IF POMEROY_MEDULLOBLASTOMA_PROGNOSIS_DN(high) AND PURBEY_TARGETS_OF_CTBP1_AND_SATB1_UP(medium) AND KRIEG_HYPOXIA_NOT_VIA_KDM3A(high) THEN G3	3	1	9	0.00330126570630424
IF HESS_TARGETS_OF_HOXA9_AND_MEIS1_UP(medium) AND KRIEG_HYPOXIA_NOT_VIA_KDM3A(high) AND ZERBINI_RESPONSE_TO_SULINDAC_DN(high) THEN G3	3	1	9	0.00330126570630424
IF SHEPARD_BMYB_MORPHOLINO_DN(low) AND MEBARKI_HCC_PROGENITOR_FZD8CRD_UP(low) AND PURBEY_TARGETS_OF_CTBP1_AND_SATB1_UP(medium) AND LI_WILMS_TUMOR_VS_FETAL_KIDNEY_2_UP(medium) THEN G2	4	1	9	0.00330126570630424
IF POMEROY_MEDULLOBLASTOMA_PROGNOSIS_DN(low) AND MATHEW_FANCONI_ANEMIA_GENES(medium) THEN G2	2	0.72141	23	0.00346362937181451
IF MATZUK_SPERMATOCYTE(low) AND LI_WILMS_TUMOR_VS_FETAL_KIDNEY_2_UP(medium) THEN G2	2	0.71875	23	0.00346362937181451
IF MYLLYKANGAS_AMPLIFICATION_HOT_SPOT_15(low) AND HOLLERN_SOLID_NODULAR_BREAST_TUMOR_UP(low) THEN G2	2	0.82915	13	0.00352558124361812
IF ZAMORA_NOS2_TARGETS_UP(low) AND ZERBINI_RESPONSE_TO_SULINDAC_DN(medium) AND MYLLYKANGAS_AMPLIFICATION_HOT_SPOT_15(low) THEN G2	3	0.91396	13	0.00352558124361812
IF SHEPARD_BMYB_MORPHOLINO_DN(low) AND ZERBINI_RESPONSE_TO_SULINDAC_DN(medium) AND MYLLYKANGAS_AMPLIFICATION_HOT_SPOT_15(low) THEN G2	3	0.86667	13	0.00352558124361812
IF POMEROY_MEDULLOBLASTOMA_PROGNOSIS_DN(medium) AND ZERBINI_RESPONSE_TO_SULINDAC_DN(medium) AND NAKAYAMA_SOFT_TISSUE_TUMORS_PCA2_UP(low) THEN G2	3	0.90041	13	0.00352558124361812
IF ZAMORA_NOS2_TARGETS_UP(low) AND PURBEY_TARGETS_OF_CTBP1_AND_SATB1_UP(medium) AND LI_WILMS_TUMOR_VS_FETAL_KIDNEY_2_UP(medium) THEN G2	3	0.88936	13	0.00352558124361812
IF MEBARKI_HCC_PROGENITOR_FZD8CRD_UP(medium) AND MYLLYKANGAS_AMPLIFICATION_HOT_SPOT_15(low) AND LI_WILMS_TUMOR_VS_FETAL_KIDNEY_2_UP(low) THEN G2	3	0.91866	13	0.00352558124361812
IF MATZUK_SPERMATOCYTE(low) AND ZAMORA_NOS2_TARGETS_UP(medium) AND MEBARKI_HCC_PROGENITOR_FZD8CRD_UP(medium) THEN G3	3	0.86667	13	0.00352558124361812
IF MEBARKI_HCC_PROGENITOR_FZD8CRD_UP(low) AND ZERBINI_RESPONSE_TO_SULINDAC_DN(medium) AND ZHOU_CELL_CYCLE_GENES_IN_IR_RESPONSE_2HR(low) THEN G2	3	0.8733	13	0.00352558124361812
IF ZAMORA_NOS2_TARGETS_UP(low) AND MEBARKI_HCC_PROGENITOR_FZD8CRD_UP(low) AND HOLLERN_SOLID_NODULAR_BREAST_TUMOR_UP(medium) THEN G2	3	0.86667	13	0.00352558124361812
IF ZERBINI_RESPONSE_TO_SULINDAC_DN(low) AND NAKAYAMA_SOFT_TISSUE_TUMORS_PCA2_UP(medium) AND LI_WILMS_TUMOR_VS_FETAL_KIDNEY_2_UP(medium) THEN G2	3	0.86667	13	0.00352558124361812
IF PURBEY_TARGETS_OF_CTBP1_AND_SATB1_UP(medium) AND ZHOU_CELL_CYCLE_GENES_IN_IR_RESPONSE_2HR(low) AND LI_WILMS_TUMOR_VS_FETAL_KIDNEY_2_UP(low) THEN G2	3	0.86667	13	0.00352558124361812
IF POMEROY_MEDULLOBLASTOMA_PROGNOSIS_DN(medium) AND KRIEG_HYPOXIA_NOT_VIA_KDM3A(low) AND ZHOU_CELL_CYCLE_GENES_IN_IR_RESPONSE_2HR(low) THEN G2	3	0.86667	13	0.00352558124361812
IF KRIEG_HYPOXIA_NOT_VIA_KDM3A(low) AND HOLLERN_SOLID_NODULAR_BREAST_TUMOR_UP(medium) AND ZHOU_CELL_CYCLE_GENES_IN_IR_RESPONSE_2HR(medium) THEN G2	3	0.91276	11	0.00373201712918937
IF KRIEG_HYPOXIA_NOT_VIA_KDM3A(low) AND ZERBINI_RESPONSE_TO_SULINDAC_DN(medium) AND LI_WILMS_TUMOR_VS_FETAL_KIDNEY_2_UP(low) THEN G2	3	0.91667	11	0.00373201712918937
IF MYLLYKANGAS_AMPLIFICATION_HOT_SPOT_15(low) AND HOLLERN_SOLID_NODULAR_BREAST_TUMOR_UP(medium) AND LI_WILMS_TUMOR_VS_FETAL_KIDNEY_2_UP(low) THEN G2	3	0.9121	11	0.00373201712918937
IF SHEPARD_BMYB_MORPHOLINO_DN(medium) AND MYLLYKANGAS_AMPLIFICATION_HOT_SPOT_15(low) AND HOLLERN_SOLID_NODULAR_BREAST_TUMOR_UP(medium) THEN G2	3	0.92208	11	0.00373201712918937
IF MATZUK_SPERMATOCYTE(medium) AND ZERBINI_RESPONSE_TO_SULINDAC_DN(medium) AND HOLLERN_SOLID_NODULAR_BREAST_TUMOR_UP(high) THEN G2	3	0.88312	11	0.00373201712918937
IF MEBARKI_HCC_PROGENITOR_FZD8CRD_UP(low) AND ZERBINI_RESPONSE_TO_SULINDAC_DN(medium) AND HOLLERN_SOLID_NODULAR_BREAST_TUMOR_UP(high) THEN G2	3	0.93025	11	0.00373201712918937
IF HESS_TARGETS_OF_HOXA9_AND_MEIS1_UP(medium) AND MEBARKI_HCC_PROGENITOR_FZD8CRD_UP(low) AND MYLLYKANGAS_AMPLIFICATION_HOT_SPOT_15(low) THEN G2	3	0.94444	11	0.00373201712918937
IF MATZUK_SPERMATOCYTE(low) AND KRIEG_HYPOXIA_NOT_VIA_KDM3A(low) AND HOLLERN_SOLID_NODULAR_BREAST_TUMOR_UP(medium) THEN G2	3	0.91039	11	0.00373201712918937
IF HESS_TARGETS_OF_HOXA9_AND_MEIS1_UP(medium) AND POMEROY_MEDULLOBLASTOMA_PROGNOSIS_DN(medium) AND KRIEG_HYPOXIA_NOT_VIA_KDM3A(high) THEN G3	3	0.95	11	0.00373201712918937
IF MATZUK_SPERMATOCYTE(medium) AND NAKAYAMA_SOFT_TISSUE_TUMORS_PCA2_UP(high) AND ZHOU_CELL_CYCLE_GENES_IN_IR_RESPONSE_2HR(medium) THEN G3	3	0.89316	11	0.00373201712918937
IF MATZUK_SPERMATOCYTE(medium) AND NAKAYAMA_SOFT_TISSUE_TUMORS_PCA2_UP(high) AND LI_WILMS_TUMOR_VS_FETAL_KIDNEY_2_UP(high) THEN G3	3	0.91667	11	0.00373201712918937
IF PURBEY_TARGETS_OF_CTBP1_AND_SATB1_UP(medium) AND LI_WILMS_TUMOR_VS_FETAL_KIDNEY_2_UP(medium) THEN G2	2	0.6997	24	0.00373201712918937
IF HESS_TARGETS_OF_HOXA9_AND_MEIS1_UP(high) AND NAKAYAMA_SOFT_TISSUE_TUMORS_PCA2_UP(high) AND LI_WILMS_TUMOR_VS_FETAL_KIDNEY_2_UP(medium) THEN G3	3	0.93702	11	0.00373201712918937
IF KRIEG_HYPOXIA_NOT_VIA_KDM3A(high) AND ZERBINI_RESPONSE_TO_SULINDAC_DN(medium) AND MYLLYKANGAS_AMPLIFICATION_HOT_SPOT_15(high) THEN G3	3	0.95833	11	0.00373201712918937
IF MATZUK_SPERMATOCYTE(medium) AND MEBARKI_HCC_PROGENITOR_FZD8CRD_UP(medium) AND KRIEG_HYPOXIA_NOT_VIA_KDM3A(low) THEN G2	3	0.91667	11	0.00373201712918937
IF ZAMORA_NOS2_TARGETS_UP(low) AND MATHEW_FANCONI_ANEMIA_GENES(medium) AND PURBEY_TARGETS_OF_CTBP1_AND_SATB1_UP(medium) THEN G2	3	0.91667	11	0.00373201712918937
IF POMEROY_MEDULLOBLASTOMA_PROGNOSIS_DN(medium) AND PURBEY_TARGETS_OF_CTBP1_AND_SATB1_UP(medium) AND MYLLYKANGAS_AMPLIFICATION_HOT_SPOT_15(low) THEN G2	3	0.91667	11	0.00373201712918937
IF MEBARKI_HCC_PROGENITOR_FZD8CRD_UP(low) AND NAKAYAMA_SOFT_TISSUE_TUMORS_PCA2_UP(medium) AND LI_WILMS_TUMOR_VS_FETAL_KIDNEY_2_UP(low) THEN G2	3	0.91667	11	0.00373201712918937
IF MATZUK_SPERMATOCYTE(high) AND KRIEG_HYPOXIA_NOT_VIA_KDM3A(medium) AND MYLLYKANGAS_AMPLIFICATION_HOT_SPOT_15(high) THEN G3	3	0.89316	11	0.00373201712918937
IF MATHEW_FANCONI_ANEMIA_GENES(medium) AND MEBARKI_HCC_PROGENITOR_FZD8CRD_UP(high) THEN G3	2	0.77976	16	0.00383738776395366
IF NAKAYAMA_SOFT_TISSUE_TUMORS_PCA2_UP(high) AND ZHOU_CELL_CYCLE_GENES_IN_IR_RESPONSE_2HR(medium) THEN G3	2	0.73831	20	0.00419249826422162
IF POMEROY_MEDULLOBLASTOMA_PROGNOSIS_DN(high) AND LI_WILMS_TUMOR_VS_FETAL_KIDNEY_2_UP(medium) THEN G3	2	0.74074	20	0.00419249826422162
IF KRIEG_HYPOXIA_NOT_VIA_KDM3A(medium) AND NAKAYAMA_SOFT_TISSUE_TUMORS_PCA2_UP(low) THEN G2	2	0.675	27	0.00472097586172472
IF HESS_TARGETS_OF_HOXA9_AND_MEIS1_UP(high) AND NAKAYAMA_SOFT_TISSUE_TUMORS_PCA2_UP(medium) THEN G2	2	0.72414	21	0.00494112829916584
IF MEBARKI_HCC_PROGENITOR_FZD8CRD_UP(medium) AND NAKAYAMA_SOFT_TISSUE_TUMORS_PCA2_UP(low) THEN G2	2	0.72633	21	0.00494112829916584
IF ZERBINI_RESPONSE_TO_SULINDAC_DN(medium) AND NAKAYAMA_SOFT_TISSUE_TUMORS_PCA2_UP(high) THEN G3	2	0.79124	17	0.00506736767003373
IF MEBARKI_HCC_PROGENITOR_FZD8CRD_UP(medium) AND MYLLYKANGAS_AMPLIFICATION_HOT_SPOT_15(high) THEN G3	2	0.74409	17	0.00506736767003373
IF NAKAYAMA_SOFT_TISSUE_TUMORS_PCA2_UP(high) AND LI_WILMS_TUMOR_VS_FETAL_KIDNEY_2_UP(medium) THEN G3	2	0.79801	17	0.00506736767003373
IF MEBARKI_HCC_PROGENITOR_FZD8CRD_UP(medium) AND NAKAYAMA_SOFT_TISSUE_TUMORS_PCA2_UP(high) THEN G3	2	0.79739	14	0.00519660869024449
IF HESS_TARGETS_OF_HOXA9_AND_MEIS1_UP(low) AND ZAMORA_NOS2_TARGETS_UP(low) AND PURBEY_TARGETS_OF_CTBP1_AND_SATB1_UP(medium) THEN G2	3	0.85439	14	0.00519660869024449
IF POMEROY_MEDULLOBLASTOMA_PROGNOSIS_DN(medium) AND MATHEW_FANCONI_ANEMIA_GENES(medium) AND NAKAYAMA_SOFT_TISSUE_TUMORS_PCA2_UP(low) THEN G2	3	0.82353	14	0.00519660869024449
IF PURBEY_TARGETS_OF_CTBP1_AND_SATB1_UP(medium) AND ZERBINI_RESPONSE_TO_SULINDAC_DN(low) AND NAKAYAMA_SOFT_TISSUE_TUMORS_PCA2_UP(medium) THEN G2	3	0.82353	14	0.00519660869024449
IF KRIEG_HYPOXIA_NOT_VIA_KDM3A(medium) AND ZERBINI_RESPONSE_TO_SULINDAC_DN(medium) AND NAKAYAMA_SOFT_TISSUE_TUMORS_PCA2_UP(medium) THEN G2	3	0.82353	14	0.00519660869024449
IF SHEPARD_BMYB_MORPHOLINO_DN(low) AND ZAMORA_NOS2_TARGETS_UP(low) AND LI_WILMS_TUMOR_VS_FETAL_KIDNEY_2_UP(medium) THEN G2	3	0.84149	14	0.00519660869024449
IF MYLLYKANGAS_AMPLIFICATION_HOT_SPOT_15(medium) AND ZHOU_CELL_CYCLE_GENES_IN_IR_RESPONSE_2HR(low) THEN G2	2	0.70968	22	0.00552250060764538
IF MEBARKI_HCC_PROGENITOR_FZD8CRD_UP(low) AND MYLLYKANGAS_AMPLIFICATION_HOT_SPOT_15(medium) THEN G2	2	0.70968	22	0.00552250060764538
IF PURBEY_TARGETS_OF_CTBP1_AND_SATB1_UP(high) AND MYLLYKANGAS_AMPLIFICATION_HOT_SPOT_15(low) AND LI_WILMS_TUMOR_VS_FETAL_KIDNEY_2_UP(medium) THEN G2	3	1	8	0.00568182852770127
IF MATZUK_SPERMATOCYTE(low) AND POMEROY_MEDULLOBLASTOMA_PROGNOSIS_DN(medium) AND PURBEY_TARGETS_OF_CTBP1_AND_SATB1_UP(medium) THEN G2	3	0.93449	8	0.00568182852770127
IF HESS_TARGETS_OF_HOXA9_AND_MEIS1_UP(high) AND LI_WILMS_TUMOR_VS_FETAL_KIDNEY_2_UP(low) THEN G2	2	0.86575	12	0.00568182852770127
IF POMEROY_MEDULLOBLASTOMA_PROGNOSIS_DN(medium) AND PURBEY_TARGETS_OF_CTBP1_AND_SATB1_UP(low) AND NAKAYAMA_SOFT_TISSUE_TUMORS_PCA2_UP(high) THEN G3	3	1	8	0.00568182852770127
IF MATZUK_SPERMATOCYTE(medium) AND KRIEG_HYPOXIA_NOT_VIA_KDM3A(medium) AND ZHOU_CELL_CYCLE_GENES_IN_IR_RESPONSE_2HR(high) THEN G2	3	0.9826	8	0.00568182852770127
IF MATZUK_SPERMATOCYTE(low) AND POMEROY_MEDULLOBLASTOMA_PROGNOSIS_DN(low) AND ZAMORA_NOS2_TARGETS_UP(low) AND LI_WILMS_TUMOR_VS_FETAL_KIDNEY_2_UP(medium) THEN G2	4	0.98056	8	0.00568182852770127
IF MATZUK_SPERMATOCYTE(medium) AND POMEROY_MEDULLOBLASTOMA_PROGNOSIS_DN(low) AND KRIEG_HYPOXIA_NOT_VIA_KDM3A(medium) THEN G2	3	0.85165	12	0.00568182852770127
IF POMEROY_MEDULLOBLASTOMA_PROGNOSIS_DN(medium) AND KRIEG_HYPOXIA_NOT_VIA_KDM3A(low) AND LI_WILMS_TUMOR_VS_FETAL_KIDNEY_2_UP(low) THEN G2	3	0.90962	8	0.00568182852770127
IF MATZUK_SPERMATOCYTE(low) AND MEBARKI_HCC_PROGENITOR_FZD8CRD_UP(low) AND NAKAYAMA_SOFT_TISSUE_TUMORS_PCA2_UP(medium) AND LI_WILMS_TUMOR_VS_FETAL_KIDNEY_2_UP(medium) THEN G2	4	1	8	0.00568182852770127
IF KRIEG_HYPOXIA_NOT_VIA_KDM3A(low) AND MYLLYKANGAS_AMPLIFICATION_HOT_SPOT_15(medium) AND HOLLERN_SOLID_NODULAR_BREAST_TUMOR_UP(medium) THEN G2	3	0.9046	8	0.00568182852770127
IF MATZUK_SPERMATOCYTE(medium) AND ZERBINI_RESPONSE_TO_SULINDAC_DN(high) THEN G3	2	0.76094	18	0.00568182852770127
IF MATZUK_SPERMATOCYTE(low) AND KRIEG_HYPOXIA_NOT_VIA_KDM3A(medium) AND LI_WILMS_TUMOR_VS_FETAL_KIDNEY_2_UP(high) THEN G3	3	1	8	0.00568182852770127
IF ZERBINI_RESPONSE_TO_SULINDAC_DN(medium) AND MYLLYKANGAS_AMPLIFICATION_HOT_SPOT_15(high) AND HOLLERN_SOLID_NODULAR_BREAST_TUMOR_UP(medium) THEN G3	3	0.94375	8	0.00568182852770127
IF HESS_TARGETS_OF_HOXA9_AND_MEIS1_UP(high) AND MEBARKI_HCC_PROGENITOR_FZD8CRD_UP(medium) AND MYLLYKANGAS_AMPLIFICATION_HOT_SPOT_15(low) THEN G2	3	1	8	0.00568182852770127
IF ZAMORA_NOS2_TARGETS_UP(low) AND PURBEY_TARGETS_OF_CTBP1_AND_SATB1_UP(medium) AND ZERBINI_RESPONSE_TO_SULINDAC_DN(medium) THEN G2	3	0.87863	12	0.00568182852770127
IF POMEROY_MEDULLOBLASTOMA_PROGNOSIS_DN(medium) AND SHEPARD_BMYB_MORPHOLINO_DN(low) AND MATHEW_FANCONI_ANEMIA_GENES(medium) THEN G2	3	0.85655	12	0.00568182852770127
IF PURBEY_TARGETS_OF_CTBP1_AND_SATB1_UP(medium) AND MYLLYKANGAS_AMPLIFICATION_HOT_SPOT_15(high) THEN G3	2	0.74736	18	0.00568182852770127
IF ZAMORA_NOS2_TARGETS_UP(medium) AND KRIEG_HYPOXIA_NOT_VIA_KDM3A(low) AND NAKAYAMA_SOFT_TISSUE_TUMORS_PCA2_UP(low) THEN G2	3	0.85072	12	0.00568182852770127
IF MYLLYKANGAS_AMPLIFICATION_HOT_SPOT_15(high) AND HOLLERN_SOLID_NODULAR_BREAST_TUMOR_UP(medium) AND LI_WILMS_TUMOR_VS_FETAL_KIDNEY_2_UP(medium) THEN G3	3	0.95	8	0.00568182852770127
IF MEBARKI_HCC_PROGENITOR_FZD8CRD_UP(high) AND PURBEY_TARGETS_OF_CTBP1_AND_SATB1_UP(high) AND KRIEG_HYPOXIA_NOT_VIA_KDM3A(high) AND MYLLYKANGAS_AMPLIFICATION_HOT_SPOT_15(medium) THEN G3	4	1	8	0.00568182852770127
IF SHEPARD_BMYB_MORPHOLINO_DN(medium) AND MATHEW_FANCONI_ANEMIA_GENES(medium) AND ZERBINI_RESPONSE_TO_SULINDAC_DN(high) THEN G3	3	1	8	0.00568182852770127
IF MATZUK_SPERMATOCYTE(high) AND MATHEW_FANCONI_ANEMIA_GENES(high) AND KRIEG_HYPOXIA_NOT_VIA_KDM3A(medium) AND MYLLYKANGAS_AMPLIFICATION_HOT_SPOT_15(high) THEN G3	4	1	8	0.00568182852770127
IF MEBARKI_HCC_PROGENITOR_FZD8CRD_UP(medium) AND PURBEY_TARGETS_OF_CTBP1_AND_SATB1_UP(medium) AND ZERBINI_RESPONSE_TO_SULINDAC_DN(low) THEN G2	3	0.94444	8	0.00568182852770127
IF POMEROY_MEDULLOBLASTOMA_PROGNOSIS_DN(high) AND MATHEW_FANCONI_ANEMIA_GENES(medium) THEN G3	2	0.76342	18	0.00568182852770127
IF POMEROY_MEDULLOBLASTOMA_PROGNOSIS_DN(high) AND ZAMORA_NOS2_TARGETS_UP(high) AND KRIEG_HYPOXIA_NOT_VIA_KDM3A(high) AND MYLLYKANGAS_AMPLIFICATION_HOT_SPOT_15(high) AND HOLLERN_SOLID_NODULAR_BREAST_TUMOR_UP(low) THEN G3	5	0.82143	12	0.00568182852770127
IF MATZUK_SPERMATOCYTE(medium) AND SHEPARD_BMYB_MORPHOLINO_DN(low) AND ZHOU_CELL_CYCLE_GENES_IN_IR_RESPONSE_2HR(medium) THEN G2	3	0.88333	12	0.00568182852770127
IF MATZUK_SPERMATOCYTE(high) AND KRIEG_HYPOXIA_NOT_VIA_KDM3A(medium) AND MYLLYKANGAS_AMPLIFICATION_HOT_SPOT_15(high) AND HOLLERN_SOLID_NODULAR_BREAST_TUMOR_UP(low) THEN G3	4	1	8	0.00568182852770127
IF POMEROY_MEDULLOBLASTOMA_PROGNOSIS_DN(medium) AND ZAMORA_NOS2_TARGETS_UP(low) AND NAKAYAMA_SOFT_TISSUE_TUMORS_PCA2_UP(low) THEN G2	3	0.85714	12	0.00568182852770127
IF SHEPARD_BMYB_MORPHOLINO_DN(low) AND ZERBINI_RESPONSE_TO_SULINDAC_DN(medium) AND MYLLYKANGAS_AMPLIFICATION_HOT_SPOT_15(medium) THEN G2	3	0.85714	12	0.00568182852770127
IF ZAMORA_NOS2_TARGETS_UP(high) AND PURBEY_TARGETS_OF_CTBP1_AND_SATB1_UP(medium) AND MYLLYKANGAS_AMPLIFICATION_HOT_SPOT_15(high) THEN G3	3	0.94798	8	0.00568182852770127
IF MATZUK_SPERMATOCYTE(medium) AND ZAMORA_NOS2_TARGETS_UP(high) THEN G3	2	0.75	18	0.00568182852770127
IF MATZUK_SPERMATOCYTE(high) AND POMEROY_MEDULLOBLASTOMA_PROGNOSIS_DN(medium) AND NAKAYAMA_SOFT_TISSUE_TUMORS_PCA2_UP(low) THEN G2	3	1	8	0.00568182852770127
IF HESS_TARGETS_OF_HOXA9_AND_MEIS1_UP(medium) AND MATZUK_SPERMATOCYTE(medium) AND POMEROY_MEDULLOBLASTOMA_PROGNOSIS_DN(low) THEN G2	3	0.85714	12	0.00568182852770127
IF POMEROY_MEDULLOBLASTOMA_PROGNOSIS_DN(medium) AND ZAMORA_NOS2_TARGETS_UP(low) AND MYLLYKANGAS_AMPLIFICATION_HOT_SPOT_15(medium) THEN G2	3	0.9127	8	0.00568182852770127
IF SHEPARD_BMYB_MORPHOLINO_DN(high) AND PURBEY_TARGETS_OF_CTBP1_AND_SATB1_UP(high) AND KRIEG_HYPOXIA_NOT_VIA_KDM3A(high) AND HOLLERN_SOLID_NODULAR_BREAST_TUMOR_UP(low) AND LI_WILMS_TUMOR_VS_FETAL_KIDNEY_2_UP(high) THEN G3	5	0.85714	12	0.00568182852770127
IF MATZUK_SPERMATOCYTE(low) AND ZERBINI_RESPONSE_TO_SULINDAC_DN(medium) AND NAKAYAMA_SOFT_TISSUE_TUMORS_PCA2_UP(low) THEN G2	3	0.92564	12	0.00568182852770127
IF ZAMORA_NOS2_TARGETS_UP(medium) AND KRIEG_HYPOXIA_NOT_VIA_KDM3A(high) AND ZERBINI_RESPONSE_TO_SULINDAC_DN(medium) THEN G3	3	1	8	0.00568182852770127
IF PURBEY_TARGETS_OF_CTBP1_AND_SATB1_UP(high) AND NAKAYAMA_SOFT_TISSUE_TUMORS_PCA2_UP(high) AND LI_WILMS_TUMOR_VS_FETAL_KIDNEY_2_UP(medium) THEN G3	3	1	8	0.00568182852770127
IF MATZUK_SPERMATOCYTE(low) AND SHEPARD_BMYB_MORPHOLINO_DN(medium) AND ZAMORA_NOS2_TARGETS_UP(medium) AND KRIEG_HYPOXIA_NOT_VIA_KDM3A(medium) THEN G3	4	1	8	0.00568182852770127
IF MATHEW_FANCONI_ANEMIA_GENES(high) AND PURBEY_TARGETS_OF_CTBP1_AND_SATB1_UP(medium) AND KRIEG_HYPOXIA_NOT_VIA_KDM3A(medium) THEN G2	3	0.88194	8	0.00568182852770127
IF KRIEG_HYPOXIA_NOT_VIA_KDM3A(high) AND ZERBINI_RESPONSE_TO_SULINDAC_DN(low) AND ZHOU_CELL_CYCLE_GENES_IN_IR_RESPONSE_2HR(low) THEN G2	3	1	8	0.00568182852770127
IF POMEROY_MEDULLOBLASTOMA_PROGNOSIS_DN(medium) AND ZHOU_CELL_CYCLE_GENES_IN_IR_RESPONSE_2HR(low) THEN G2	2	0.69762	23	0.00568182852770127
IF SHEPARD_BMYB_MORPHOLINO_DN(medium) AND ZERBINI_RESPONSE_TO_SULINDAC_DN(high) AND MYLLYKANGAS_AMPLIFICATION_HOT_SPOT_15(high) THEN G3	3	1	8	0.00568182852770127
IF PURBEY_TARGETS_OF_CTBP1_AND_SATB1_UP(high) AND ZERBINI_RESPONSE_TO_SULINDAC_DN(medium) AND HOLLERN_SOLID_NODULAR_BREAST_TUMOR_UP(high) THEN G2	3	0.96296	8	0.00568182852770127
IF MATZUK_SPERMATOCYTE(medium) AND MYLLYKANGAS_AMPLIFICATION_HOT_SPOT_15(low) AND NAKAYAMA_SOFT_TISSUE_TUMORS_PCA2_UP(medium) THEN G2	3	0.85714	12	0.00568182852770127
IF PURBEY_TARGETS_OF_CTBP1_AND_SATB1_UP(medium) AND NAKAYAMA_SOFT_TISSUE_TUMORS_PCA2_UP(low) AND LI_WILMS_TUMOR_VS_FETAL_KIDNEY_2_UP(medium) THEN G2	3	0.94444	8	0.00568182852770127
IF HESS_TARGETS_OF_HOXA9_AND_MEIS1_UP(medium) AND MATZUK_SPERMATOCYTE(low) AND MYLLYKANGAS_AMPLIFICATION_HOT_SPOT_15(low) THEN G2	3	0.81538	12	0.00568182852770127
IF MATHEW_FANCONI_ANEMIA_GENES(high) AND PURBEY_TARGETS_OF_CTBP1_AND_SATB1_UP(high) AND KRIEG_HYPOXIA_NOT_VIA_KDM3A(high) AND MYLLYKANGAS_AMPLIFICATION_HOT_SPOT_15(medium) THEN G3	4	0.89622	8	0.00568182852770127
IF MATHEW_FANCONI_ANEMIA_GENES(high) AND KRIEG_HYPOXIA_NOT_VIA_KDM3A(medium) AND MYLLYKANGAS_AMPLIFICATION_HOT_SPOT_15(high) THEN G3	3	1	8	0.00568182852770127
IF ZAMORA_NOS2_TARGETS_UP(medium) AND KRIEG_HYPOXIA_NOT_VIA_KDM3A(high) AND ZHOU_CELL_CYCLE_GENES_IN_IR_RESPONSE_2HR(medium) THEN G3	3	1	8	0.00568182852770127
IF KRIEG_HYPOXIA_NOT_VIA_KDM3A(high) AND HOLLERN_SOLID_NODULAR_BREAST_TUMOR_UP(medium) AND LI_WILMS_TUMOR_VS_FETAL_KIDNEY_2_UP(medium) THEN G3	3	1	8	0.00568182852770127
IF ZAMORA_NOS2_TARGETS_UP(high) AND KRIEG_HYPOXIA_NOT_VIA_KDM3A(high) AND MYLLYKANGAS_AMPLIFICATION_HOT_SPOT_15(high) AND HOLLERN_SOLID_NODULAR_BREAST_TUMOR_UP(low) AND LI_WILMS_TUMOR_VS_FETAL_KIDNEY_2_UP(high) THEN G3	5	0.85714	12	0.00568182852770127
IF HESS_TARGETS_OF_HOXA9_AND_MEIS1_UP(high) AND MATHEW_FANCONI_ANEMIA_GENES(medium) AND NAKAYAMA_SOFT_TISSUE_TUMORS_PCA2_UP(low) THEN G2	3	0.94444	8	0.00568182852770127
IF POMEROY_MEDULLOBLASTOMA_PROGNOSIS_DN(medium) AND NAKAYAMA_SOFT_TISSUE_TUMORS_PCA2_UP(low) AND ZHOU_CELL_CYCLE_GENES_IN_IR_RESPONSE_2HR(low) THEN G2	3	0.86109	12	0.00568182852770127
IF HESS_TARGETS_OF_HOXA9_AND_MEIS1_UP(low) AND HOLLERN_SOLID_NODULAR_BREAST_TUMOR_UP(medium) AND LI_WILMS_TUMOR_VS_FETAL_KIDNEY_2_UP(low) THEN G2	3	0.82086	12	0.00568182852770127
IF ZERBINI_RESPONSE_TO_SULINDAC_DN(medium) AND NAKAYAMA_SOFT_TISSUE_TUMORS_PCA2_UP(low) AND LI_WILMS_TUMOR_VS_FETAL_KIDNEY_2_UP(medium) THEN G2	3	0.85714	12	0.00568182852770127
IF HESS_TARGETS_OF_HOXA9_AND_MEIS1_UP(high) AND POMEROY_MEDULLOBLASTOMA_PROGNOSIS_DN(medium) AND LI_WILMS_TUMOR_VS_FETAL_KIDNEY_2_UP(high) THEN G3	3	1	8	0.00568182852770127
IF SHEPARD_BMYB_MORPHOLINO_DN(low) AND ZAMORA_NOS2_TARGETS_UP(medium) AND HOLLERN_SOLID_NODULAR_BREAST_TUMOR_UP(medium) THEN G2	3	1	8	0.00568182852770127
IF MATZUK_SPERMATOCYTE(medium) AND POMEROY_MEDULLOBLASTOMA_PROGNOSIS_DN(medium) AND ZERBINI_RESPONSE_TO_SULINDAC_DN(high) THEN G3	3	1	8	0.00568182852770127
IF SHEPARD_BMYB_MORPHOLINO_DN(medium) AND MATHEW_FANCONI_ANEMIA_GENES(medium) AND KRIEG_HYPOXIA_NOT_VIA_KDM3A(low) THEN G2	3	0.88333	12	0.00568182852770127
IF POMEROY_MEDULLOBLASTOMA_PROGNOSIS_DN(high) AND KRIEG_HYPOXIA_NOT_VIA_KDM3A(high) AND LI_WILMS_TUMOR_VS_FETAL_KIDNEY_2_UP(medium) THEN G3	3	0.90556	8	0.00568182852770127
IF HESS_TARGETS_OF_HOXA9_AND_MEIS1_UP(high) AND ZAMORA_NOS2_TARGETS_UP(medium) AND NAKAYAMA_SOFT_TISSUE_TUMORS_PCA2_UP(high) THEN G3	3	1	8	0.00568182852770127
IF ZERBINI_RESPONSE_TO_SULINDAC_DN(medium) AND HOLLERN_SOLID_NODULAR_BREAST_TUMOR_UP(high) AND NAKAYAMA_SOFT_TISSUE_TUMORS_PCA2_UP(low) THEN G2	3	0.94444	8	0.00568182852770127
IF PURBEY_TARGETS_OF_CTBP1_AND_SATB1_UP(low) AND HOLLERN_SOLID_NODULAR_BREAST_TUMOR_UP(low) AND ZHOU_CELL_CYCLE_GENES_IN_IR_RESPONSE_2HR(low) THEN G2	3	1	8	0.00568182852770127
IF MATZUK_SPERMATOCYTE(medium) AND MATHEW_FANCONI_ANEMIA_GENES(medium) AND KRIEG_HYPOXIA_NOT_VIA_KDM3A(low) THEN G2	3	0.85714	12	0.00568182852770127
IF POMEROY_MEDULLOBLASTOMA_PROGNOSIS_DN(low) AND PURBEY_TARGETS_OF_CTBP1_AND_SATB1_UP(medium) THEN G2	2	0.69697	23	0.00568182852770127
IF ZAMORA_NOS2_TARGETS_UP(medium) AND MEBARKI_HCC_PROGENITOR_FZD8CRD_UP(low) AND KRIEG_HYPOXIA_NOT_VIA_KDM3A(low) THEN G2	3	0.95	8	0.00568182852770127
IF SHEPARD_BMYB_MORPHOLINO_DN(medium) AND KRIEG_HYPOXIA_NOT_VIA_KDM3A(high) AND ZERBINI_RESPONSE_TO_SULINDAC_DN(high) THEN G3	3	1	8	0.00568182852770127
IF MEBARKI_HCC_PROGENITOR_FZD8CRD_UP(high) AND KRIEG_HYPOXIA_NOT_VIA_KDM3A(high) AND MYLLYKANGAS_AMPLIFICATION_HOT_SPOT_15(medium) THEN G3	3	0.85714	12	0.00568182852770127
IF SHEPARD_BMYB_MORPHOLINO_DN(high) AND PURBEY_TARGETS_OF_CTBP1_AND_SATB1_UP(high) AND LI_WILMS_TUMOR_VS_FETAL_KIDNEY_2_UP(medium) THEN G3	3	1	8	0.00568182852770127
IF MATZUK_SPERMATOCYTE(low) AND POMEROY_MEDULLOBLASTOMA_PROGNOSIS_DN(low) AND LI_WILMS_TUMOR_VS_FETAL_KIDNEY_2_UP(medium) THEN G2	3	0.85714	12	0.00568182852770127
IF HESS_TARGETS_OF_HOXA9_AND_MEIS1_UP(medium) AND POMEROY_MEDULLOBLASTOMA_PROGNOSIS_DN(medium) AND KRIEG_HYPOXIA_NOT_VIA_KDM3A(low) THEN G2	3	0.85714	12	0.00568182852770127
IF MEBARKI_HCC_PROGENITOR_FZD8CRD_UP(high) AND KRIEG_HYPOXIA_NOT_VIA_KDM3A(high) AND HOLLERN_SOLID_NODULAR_BREAST_TUMOR_UP(high) THEN G3	3	1	8	0.00568182852770127
IF POMEROY_MEDULLOBLASTOMA_PROGNOSIS_DN(medium) AND MATHEW_FANCONI_ANEMIA_GENES(medium) AND KRIEG_HYPOXIA_NOT_VIA_KDM3A(low) THEN G2	3	0.85714	12	0.00568182852770127
IF POMEROY_MEDULLOBLASTOMA_PROGNOSIS_DN(low) AND MEBARKI_HCC_PROGENITOR_FZD8CRD_UP(low) AND PURBEY_TARGETS_OF_CTBP1_AND_SATB1_UP(medium) AND NAKAYAMA_SOFT_TISSUE_TUMORS_PCA2_UP(medium) THEN G2	4	1	8	0.00568182852770127
IF POMEROY_MEDULLOBLASTOMA_PROGNOSIS_DN(medium) AND MATHEW_FANCONI_ANEMIA_GENES(low) AND KRIEG_HYPOXIA_NOT_VIA_KDM3A(low) THEN G2	3	1	8	0.00568182852770127
IF MATHEW_FANCONI_ANEMIA_GENES(high) AND MEBARKI_HCC_PROGENITOR_FZD8CRD_UP(medium) AND MYLLYKANGAS_AMPLIFICATION_HOT_SPOT_15(high) THEN G3	3	1	8	0.00568182852770127
IF SHEPARD_BMYB_MORPHOLINO_DN(low) AND ZAMORA_NOS2_TARGETS_UP(high) AND MYLLYKANGAS_AMPLIFICATION_HOT_SPOT_15(high) THEN G3	3	1	8	0.00568182852770127
IF ZAMORA_NOS2_TARGETS_UP(medium) AND KRIEG_HYPOXIA_NOT_VIA_KDM3A(high) AND NAKAYAMA_SOFT_TISSUE_TUMORS_PCA2_UP(high) THEN G3	3	1	8	0.00568182852770127
IF SHEPARD_BMYB_MORPHOLINO_DN(high) AND KRIEG_HYPOXIA_NOT_VIA_KDM3A(medium) AND NAKAYAMA_SOFT_TISSUE_TUMORS_PCA2_UP(medium) THEN G2	3	1	8	0.00568182852770127
IF ZAMORA_NOS2_TARGETS_UP(medium) AND MYLLYKANGAS_AMPLIFICATION_HOT_SPOT_15(medium) AND LI_WILMS_TUMOR_VS_FETAL_KIDNEY_2_UP(high) THEN G3	3	1	8	0.00568182852770127
IF MATHEW_FANCONI_ANEMIA_GENES(high) AND LI_WILMS_TUMOR_VS_FETAL_KIDNEY_2_UP(low) THEN G2	2	0.88002	10	0.00604468726693236
IF MEBARKI_HCC_PROGENITOR_FZD8CRD_UP(low) AND KRIEG_HYPOXIA_NOT_VIA_KDM3A(low) AND ZERBINI_RESPONSE_TO_SULINDAC_DN(medium) THEN G2	3	0.92402	10	0.00604468726693236
IF POMEROY_MEDULLOBLASTOMA_PROGNOSIS_DN(medium) AND MEBARKI_HCC_PROGENITOR_FZD8CRD_UP(low) AND KRIEG_HYPOXIA_NOT_VIA_KDM3A(low) THEN G2	3	0.87997	10	0.00604468726693236
IF ZAMORA_NOS2_TARGETS_UP(medium) AND KRIEG_HYPOXIA_NOT_VIA_KDM3A(medium) AND ZHOU_CELL_CYCLE_GENES_IN_IR_RESPONSE_2HR(high) THEN G2	3	0.92247	10	0.00604468726693236
IF HESS_TARGETS_OF_HOXA9_AND_MEIS1_UP(medium) AND POMEROY_MEDULLOBLASTOMA_PROGNOSIS_DN(low) AND NAKAYAMA_SOFT_TISSUE_TUMORS_PCA2_UP(medium) THEN G2	3	0.86093	10	0.00604468726693236
IF MATZUK_SPERMATOCYTE(medium) AND MYLLYKANGAS_AMPLIFICATION_HOT_SPOT_15(high) AND NAKAYAMA_SOFT_TISSUE_TUMORS_PCA2_UP(high) THEN G3	3	0.90909	10	0.00604468726693236
IF PURBEY_TARGETS_OF_CTBP1_AND_SATB1_UP(medium) AND MYLLYKANGAS_AMPLIFICATION_HOT_SPOT_15(low) AND NAKAYAMA_SOFT_TISSUE_TUMORS_PCA2_UP(low) THEN G2	3	0.93544	10	0.00604468726693236
IF PURBEY_TARGETS_OF_CTBP1_AND_SATB1_UP(low) AND ZERBINI_RESPONSE_TO_SULINDAC_DN(medium) AND NAKAYAMA_SOFT_TISSUE_TUMORS_PCA2_UP(medium) THEN G2	3	0.90909	10	0.00604468726693236
IF KRIEG_HYPOXIA_NOT_VIA_KDM3A(low) AND ZERBINI_RESPONSE_TO_SULINDAC_DN(medium) AND ZHOU_CELL_CYCLE_GENES_IN_IR_RESPONSE_2HR(medium) THEN G2	3	0.91842	10	0.00604468726693236
IF PURBEY_TARGETS_OF_CTBP1_AND_SATB1_UP(medium) AND KRIEG_HYPOXIA_NOT_VIA_KDM3A(medium) AND ZERBINI_RESPONSE_TO_SULINDAC_DN(high) THEN G2	3	0.87854	10	0.00604468726693236
IF MEBARKI_HCC_PROGENITOR_FZD8CRD_UP(low) AND PURBEY_TARGETS_OF_CTBP1_AND_SATB1_UP(medium) AND LI_WILMS_TUMOR_VS_FETAL_KIDNEY_2_UP(medium) THEN G2	3	0.85648	10	0.00604468726693236
IF POMEROY_MEDULLOBLASTOMA_PROGNOSIS_DN(medium) AND NAKAYAMA_SOFT_TISSUE_TUMORS_PCA2_UP(medium) AND LI_WILMS_TUMOR_VS_FETAL_KIDNEY_2_UP(low) THEN G2	3	0.90687	10	0.00604468726693236
IF MATZUK_SPERMATOCYTE(low) AND PURBEY_TARGETS_OF_CTBP1_AND_SATB1_UP(low) AND KRIEG_HYPOXIA_NOT_VIA_KDM3A(low) AND NAKAYAMA_SOFT_TISSUE_TUMORS_PCA2_UP(low) THEN G2	4	0.92096	10	0.00604468726693236
IF POMEROY_MEDULLOBLASTOMA_PROGNOSIS_DN(medium) AND KRIEG_HYPOXIA_NOT_VIA_KDM3A(low) AND MYLLYKANGAS_AMPLIFICATION_HOT_SPOT_15(medium) THEN G2	3	0.90326	10	0.00604468726693236
IF KRIEG_HYPOXIA_NOT_VIA_KDM3A(medium) AND NAKAYAMA_SOFT_TISSUE_TUMORS_PCA2_UP(high) THEN G3	2	0.73185	19	0.00604468726693236
IF ZAMORA_NOS2_TARGETS_UP(medium) AND MYLLYKANGAS_AMPLIFICATION_HOT_SPOT_15(low) AND LI_WILMS_TUMOR_VS_FETAL_KIDNEY_2_UP(low) THEN G2	3	0.92083	10	0.00604468726693236
IF KRIEG_HYPOXIA_NOT_VIA_KDM3A(low) AND MYLLYKANGAS_AMPLIFICATION_HOT_SPOT_15(medium) THEN G2	2	0.73515	19	0.00604468726693236
IF KRIEG_HYPOXIA_NOT_VIA_KDM3A(high) AND MYLLYKANGAS_AMPLIFICATION_HOT_SPOT_15(medium) THEN G3	2	0.71364	19	0.00604468726693236
IF MATHEW_FANCONI_ANEMIA_GENES(high) AND KRIEG_HYPOXIA_NOT_VIA_KDM3A(high) AND MYLLYKANGAS_AMPLIFICATION_HOT_SPOT_15(medium) THEN G3	3	0.92294	10	0.00604468726693236
IF MATZUK_SPERMATOCYTE(low) AND MEBARKI_HCC_PROGENITOR_FZD8CRD_UP(low) AND MYLLYKANGAS_AMPLIFICATION_HOT_SPOT_15(low) AND LI_WILMS_TUMOR_VS_FETAL_KIDNEY_2_UP(medium) THEN G2	4	0.93319	10	0.00604468726693236
IF MATZUK_SPERMATOCYTE(medium) AND PURBEY_TARGETS_OF_CTBP1_AND_SATB1_UP(medium) AND MYLLYKANGAS_AMPLIFICATION_HOT_SPOT_15(low) THEN G2	3	0.93968	10	0.00604468726693236
IF MATZUK_SPERMATOCYTE(low) AND SHEPARD_BMYB_MORPHOLINO_DN(low) AND ZAMORA_NOS2_TARGETS_UP(low) AND LI_WILMS_TUMOR_VS_FETAL_KIDNEY_2_UP(medium) THEN G2	4	0.91088	10	0.00604468726693236
IF HESS_TARGETS_OF_HOXA9_AND_MEIS1_UP(medium) AND MATZUK_SPERMATOCYTE(low) AND ZERBINI_RESPONSE_TO_SULINDAC_DN(medium) THEN G2	3	0.90477	10	0.00604468726693236
IF MATZUK_SPERMATOCYTE(medium) AND POMEROY_MEDULLOBLASTOMA_PROGNOSIS_DN(low) AND MEBARKI_HCC_PROGENITOR_FZD8CRD_UP(medium) THEN G2	3	0.90909	10	0.00604468726693236
IF MATHEW_FANCONI_ANEMIA_GENES(medium) AND MYLLYKANGAS_AMPLIFICATION_HOT_SPOT_15(low) AND LI_WILMS_TUMOR_VS_FETAL_KIDNEY_2_UP(low) THEN G2	3	0.90909	10	0.00604468726693236
IF MATZUK_SPERMATOCYTE(medium) AND MYLLYKANGAS_AMPLIFICATION_HOT_SPOT_15(low) THEN G2	2	0.7332	19	0.00604468726693236
IF MATZUK_SPERMATOCYTE(high) AND MYLLYKANGAS_AMPLIFICATION_HOT_SPOT_15(high) AND NAKAYAMA_SOFT_TISSUE_TUMORS_PCA2_UP(medium) THEN G3	3	0.91162	10	0.00604468726693236
IF KRIEG_HYPOXIA_NOT_VIA_KDM3A(medium) AND MYLLYKANGAS_AMPLIFICATION_HOT_SPOT_15(high) THEN G3	2	0.73807	19	0.00604468726693236
IF ZAMORA_NOS2_TARGETS_UP(low) AND KRIEG_HYPOXIA_NOT_VIA_KDM3A(low) AND ZERBINI_RESPONSE_TO_SULINDAC_DN(medium) THEN G2	3	0.93721	10	0.00604468726693236
IF HESS_TARGETS_OF_HOXA9_AND_MEIS1_UP(medium) AND ZAMORA_NOS2_TARGETS_UP(low) AND LI_WILMS_TUMOR_VS_FETAL_KIDNEY_2_UP(medium) THEN G2	3	0.86752	10	0.00604468726693236
IF PURBEY_TARGETS_OF_CTBP1_AND_SATB1_UP(medium) AND KRIEG_HYPOXIA_NOT_VIA_KDM3A(medium) AND LI_WILMS_TUMOR_VS_FETAL_KIDNEY_2_UP(medium) THEN G2	3	0.86364	10	0.00604468726693236
IF SHEPARD_BMYB_MORPHOLINO_DN(high) AND PURBEY_TARGETS_OF_CTBP1_AND_SATB1_UP(high) AND HOLLERN_SOLID_NODULAR_BREAST_TUMOR_UP(medium) THEN G3	3	0.97863	10	0.00604468726693236
IF MATZUK_SPERMATOCYTE(medium) AND ZHOU_CELL_CYCLE_GENES_IN_IR_RESPONSE_2HR(low) THEN G2	2	0.73131	19	0.00604468726693236
IF POMEROY_MEDULLOBLASTOMA_PROGNOSIS_DN(low) AND ZAMORA_NOS2_TARGETS_UP(low) AND MEBARKI_HCC_PROGENITOR_FZD8CRD_UP(medium) THEN G2	3	0.90909	10	0.00604468726693236
IF MATZUK_SPERMATOCYTE(high) AND SHEPARD_BMYB_MORPHOLINO_DN(medium) AND MYLLYKANGAS_AMPLIFICATION_HOT_SPOT_15(high) THEN G3	3	0.90909	10	0.00604468726693236
IF ZAMORA_NOS2_TARGETS_UP(medium) AND PURBEY_TARGETS_OF_CTBP1_AND_SATB1_UP(low) AND KRIEG_HYPOXIA_NOT_VIA_KDM3A(low) THEN G2	3	0.90909	10	0.00604468726693236
IF HESS_TARGETS_OF_HOXA9_AND_MEIS1_UP(medium) AND MATHEW_FANCONI_ANEMIA_GENES(low) AND KRIEG_HYPOXIA_NOT_VIA_KDM3A(high) THEN G3	3	0.90909	10	0.00604468726693236
IF HOLLERN_SOLID_NODULAR_BREAST_TUMOR_UP(low) AND LI_WILMS_TUMOR_VS_FETAL_KIDNEY_2_UP(low) THEN G2	2	0.73077	19	0.00604468726693236
IF ZERBINI_RESPONSE_TO_SULINDAC_DN(medium) AND NAKAYAMA_SOFT_TISSUE_TUMORS_PCA2_UP(medium) AND ZHOU_CELL_CYCLE_GENES_IN_IR_RESPONSE_2HR(low) THEN G2	3	0.90909	10	0.00604468726693236
IF KRIEG_HYPOXIA_NOT_VIA_KDM3A(high) AND ZHOU_CELL_CYCLE_GENES_IN_IR_RESPONSE_2HR(medium) THEN G3	2	0.70343	20	0.00659030012028743
IF MATHEW_FANCONI_ANEMIA_GENES(medium) AND MYLLYKANGAS_AMPLIFICATION_HOT_SPOT_15(high) THEN G3	2	0.72859	20	0.00659030012028743
IF HESS_TARGETS_OF_HOXA9_AND_MEIS1_UP(medium) AND ZERBINI_RESPONSE_TO_SULINDAC_DN(high) THEN G3	2	0.71429	20	0.00659030012028743
IF SHEPARD_BMYB_MORPHOLINO_DN(low) AND MYLLYKANGAS_AMPLIFICATION_HOT_SPOT_15(medium) THEN G2	2	0.68758	21	0.00744576012595302
IF HESS_TARGETS_OF_HOXA9_AND_MEIS1_UP(medium) AND ZAMORA_NOS2_TARGETS_UP(low) AND MYLLYKANGAS_AMPLIFICATION_HOT_SPOT_15(low) THEN G2	3	0.82541	13	0.00785326183770291
IF SHEPARD_BMYB_MORPHOLINO_DN(low) AND MYLLYKANGAS_AMPLIFICATION_HOT_SPOT_15(low) AND LI_WILMS_TUMOR_VS_FETAL_KIDNEY_2_UP(medium) THEN G2	3	0.8125	13	0.00785326183770291
IF KRIEG_HYPOXIA_NOT_VIA_KDM3A(low) AND ZERBINI_RESPONSE_TO_SULINDAC_DN(medium) AND NAKAYAMA_SOFT_TISSUE_TUMORS_PCA2_UP(low) THEN G2	3	0.83259	13	0.00785326183770291
IF POMEROY_MEDULLOBLASTOMA_PROGNOSIS_DN(medium) AND KRIEG_HYPOXIA_NOT_VIA_KDM3A(low) AND MYLLYKANGAS_AMPLIFICATION_HOT_SPOT_15(low) THEN G2	3	0.8125	13	0.00785326183770291
IF PURBEY_TARGETS_OF_CTBP1_AND_SATB1_UP(low) AND ZERBINI_RESPONSE_TO_SULINDAC_DN(medium) THEN G2	2	0.6875	22	0.00815598683064552
IF SHEPARD_BMYB_MORPHOLINO_DN(medium) AND MYLLYKANGAS_AMPLIFICATION_HOT_SPOT_15(high) THEN G3	2	0.74306	17	0.0087335150333001
IF POMEROY_MEDULLOBLASTOMA_PROGNOSIS_DN(medium) AND MEBARKI_HCC_PROGENITOR_FZD8CRD_UP(high) THEN G3	2	0.74116	17	0.0087335150333001
