# Supplementary material for: Machine Learning-Based Analysis of Glioma Grades Reveals Co-Enrichment
Source: Cancers (Basel). 2022 Feb 17;14(4):1014. doi: 10.3390/cancers14041014 (PMC8870250; doi:10.3390/cancers14041014)
Supplement: Supplementary file 1 [file cancers-14-01014-s001.zip › Table.S8.xlsx]

## Sheet: GOCC_LGGvs.GBM
rule	length	accuracy	support	pValue
IF INTERMEDIATE_DENSITY_LIPOPROTEIN_PARTICLE(low) THEN GBM	1	0.86154	56	1.08674851371955e-14
IF INTERMEDIATE_DENSITY_LIPOPROTEIN_PARTICLE(high) THEN LGG	1	0.8625	55	1.72625549825163e-14
IF INTERMEDIATE_DENSITY_LIPOPROTEIN_PARTICLE(high) AND RNA_POLYMERASE_II_CORE_COMPLEX(low) THEN LGG	2	0.93308	32	1.77319475124671e-09
IF INTERMEDIATE_DENSITY_LIPOPROTEIN_PARTICLE(high) AND PYRUVATE_DEHYDROGENASE_COMPLEX(low) THEN LGG	2	0.93868	31	3.08523333166731e-09
IF INTERMEDIATE_DENSITY_LIPOPROTEIN_PARTICLE(high) AND TRIGLYCERIDE_RICH_PLASMA_LIPOPROTEIN_PARTICLE(high) THEN LGG	2	0.91667	33	3.08523333166731e-09
IF RNA_POLYMERASE_II_CORE_COMPLEX(low) AND SPHERICAL_HIGH_DENSITY_LIPOPROTEIN_PARTICLE(high) THEN LGG	2	0.95842	28	4.89709663398113e-09
IF INTERMEDIATE_DENSITY_LIPOPROTEIN_PARTICLE(low) AND RNA_POLYMERASE_II_CORE_COMPLEX(high) THEN GBM	2	0.9375	30	5.75544097334142e-09
IF INTERMEDIATE_DENSITY_LIPOPROTEIN_PARTICLE(high) AND KINESIN_COMPLEX(high) THEN LGG	2	0.95062	27	8.99732478066832e-09
IF INTERMEDIATE_DENSITY_LIPOPROTEIN_PARTICLE(high) AND MICROTUBULE_ORGANIZING_CENTER(high) THEN LGG	2	0.93624	27	8.99732478066832e-09
IF CHYLOMICRON(high) AND PYRUVATE_DEHYDROGENASE_COMPLEX(low) THEN LGG	2	0.94708	29	9.09811463598172e-09
IF CHYLOMICRON(high) AND LOW_DENSITY_LIPOPROTEIN_PARTICLE(high) THEN LGG	2	0.89189	33	9.09811463598172e-09
IF TRIGLYCERIDE_RICH_PLASMA_LIPOPROTEIN_PARTICLE(high) AND LAMELLAR_BODY(high) THEN LGG	2	0.9294	29	9.09811463598172e-09
IF KINESIN_COMPLEX(high) AND PYRUVATE_DEHYDROGENASE_COMPLEX(low) THEN LGG	2	0.94621	26	1.5794810880542e-08
IF INTERMEDIATE_DENSITY_LIPOPROTEIN_PARTICLE(high) AND LAMELLAR_BODY(high) THEN LGG	2	0.94066	26	1.5794810880542e-08
IF SPHERICAL_HIGH_DENSITY_LIPOPROTEIN_PARTICLE(low) AND MICROTUBULE_MINUS_END(low) THEN GBM	2	0.92187	28	1.72261828565942e-08
IF LOW_DENSITY_LIPOPROTEIN_PARTICLE(high) AND PYRUVATE_DEHYDROGENASE_COMPLEX(low) THEN LGG	2	0.9373	28	1.72261828565942e-08
IF INTERMEDIATE_DENSITY_LIPOPROTEIN_PARTICLE(low) AND MICROTUBULE_MINUS_END(low) THEN GBM	2	0.93082	28	1.72261828565942e-08
IF GLYCOSYLPHOSPHATIDYLINOSITOL_N_ACETYLGLUCOSAMINYLTRANSFERASE_GPI_GNT_COMPLEX(low) AND KINESIN_COMPLEX(high) THEN LGG	2	0.88571	31	3.63680803837811e-08
IF INTERMEDIATE_DENSITY_LIPOPROTEIN_PARTICLE(high) AND GLYCOSYLPHOSPHATIDYLINOSITOL_N_ACETYLGLUCOSAMINYLTRANSFERASE_GPI_GNT_COMPLEX(low) THEN LGG	2	0.93635	27	3.70231455487973e-08
IF CHYLOMICRON(low) AND RESPIRATORY_CHAIN_COMPLEX_II(high) THEN GBM	2	0.93615	27	3.70231455487973e-08
IF KINESIN_COMPLEX(high) AND MICROTUBULE_MINUS_END(high) THEN LGG	2	0.90625	29	3.70231455487973e-08
IF TRIGLYCERIDE_RICH_PLASMA_LIPOPROTEIN_PARTICLE(low) AND RESPIRATORY_CHAIN_COMPLEX_II(high) THEN GBM	2	0.92184	24	6.97613518901129e-08
IF CHYLOMICRON(high) AND RESPIRATORY_CHAIN_COMPLEX_II(low) THEN LGG	2	0.93148	24	6.97613518901129e-08
IF SPHERICAL_HIGH_DENSITY_LIPOPROTEIN_PARTICLE(low) AND RESPIRATORY_CHAIN_COMPLEX_II(high) THEN GBM	2	0.94755	26	8.17238373299213e-08
IF CHYLOMICRON(high) AND LAMELLAR_BODY(high) THEN LGG	2	0.91245	26	8.17238373299213e-08
IF INTERMEDIATE_DENSITY_LIPOPROTEIN_PARTICLE(low) AND RESPIRATORY_CHAIN_COMPLEX_II(high) THEN GBM	2	0.92071	25	1.61026024467592e-07
IF INTERMEDIATE_DENSITY_LIPOPROTEIN_PARTICLE(low) AND LAMELLAR_BODY(medium) THEN GBM	2	0.89041	27	1.61026024467592e-07
IF INTERMEDIATE_DENSITY_LIPOPROTEIN_PARTICLE(high) AND MITOCHONDRIAL_ALPHA_KETOGLUTARATE_DEHYDROGENASE_COMPLEX(medium) THEN LGG	2	0.95777	23	1.61026024467592e-07
IF KINESIN_COMPLEX(high) AND LYSOSOMAL_LUMEN(low) THEN LGG	2	0.89143	27	1.61026024467592e-07
IF INTERMEDIATE_DENSITY_LIPOPROTEIN_PARTICLE(low) AND PYRUVATE_DEHYDROGENASE_COMPLEX(high) THEN GBM	2	0.92004	25	1.61026024467592e-07
IF KINESIN_COMPLEX(high) AND VACUOLE(low) THEN LGG	2	0.91552	27	1.61026024467592e-07
IF SPHERICAL_HIGH_DENSITY_LIPOPROTEIN_PARTICLE(high) AND GLYCOSYLPHOSPHATIDYLINOSITOL_N_ACETYLGLUCOSAMINYLTRANSFERASE_GPI_GNT_COMPLEX(low) THEN LGG	2	0.92146	27	1.61026024467592e-07
IF RESPIRATORY_CHAIN_COMPLEX_II(low) AND VACUOLE(low) THEN LGG	2	0.9	27	1.61026024467592e-07
IF TRIGLYCERIDE_RICH_PLASMA_LIPOPROTEIN_PARTICLE(low) AND LAMELLAR_BODY(medium) THEN GBM	2	0.89302	24	2.48695337866851e-07
IF TRIGLYCERIDE_RICH_PLASMA_LIPOPROTEIN_PARTICLE(low) AND LYSOSOMAL_LUMEN(medium) THEN GBM	2	0.91564	24	2.48695337866851e-07
IF SPHERICAL_HIGH_DENSITY_LIPOPROTEIN_PARTICLE(low) AND LAMELLAR_BODY(medium) THEN GBM	2	0.8888	26	2.48695337866851e-07
IF INTERMEDIATE_DENSITY_LIPOPROTEIN_PARTICLE(high) AND PROTEIN_DNA_COMPLEX(low) THEN LGG	2	0.90876	24	2.48695337866851e-07
IF LOW_DENSITY_LIPOPROTEIN_PARTICLE(high) AND KINESIN_COMPLEX(high) THEN LGG	2	0.90609	24	2.48695337866851e-07
IF TRIGLYCERIDE_RICH_PLASMA_LIPOPROTEIN_PARTICLE(high) AND MICROTUBULE_ORGANIZING_CENTER(high) THEN LGG	2	0.9396	22	2.48695337866851e-07
IF TRIGLYCERIDE_RICH_PLASMA_LIPOPROTEIN_PARTICLE(low) AND MICROTUBULE_MINUS_END(low) THEN GBM	2	0.91094	24	2.48695337866851e-07
IF CHYLOMICRON(low) AND MICROTUBULE_MINUS_END(low) THEN GBM	2	0.93108	24	2.48695337866851e-07
IF INTERMEDIATE_DENSITY_LIPOPROTEIN_PARTICLE(low) AND HEMIDESMOSOME(low) THEN GBM	2	0.9069	24	2.48695337866851e-07
IF INTERMEDIATE_DENSITY_LIPOPROTEIN_PARTICLE(low) AND MITOCHONDRIAL_ALPHA_KETOGLUTARATE_DEHYDROGENASE_COMPLEX(low) THEN GBM	2	0.88373	28	2.48695337866851e-07
IF SPHERICAL_HIGH_DENSITY_LIPOPROTEIN_PARTICLE(low) AND VACUOLE(high) THEN GBM	2	0.90118	24	2.48695337866851e-07
IF INTERMEDIATE_DENSITY_LIPOPROTEIN_PARTICLE(high) AND RESPIRATORY_CHAIN_COMPLEX_II(low) THEN LGG	2	0.92932	24	2.48695337866851e-07
IF RNA_POLYMERASE_II_CORE_COMPLEX(high) AND SPHERICAL_HIGH_DENSITY_LIPOPROTEIN_PARTICLE(low) THEN GBM	2	0.89689	24	2.48695337866851e-07
IF RNA_POLYMERASE_II_CORE_COMPLEX(low) AND LOW_DENSITY_LIPOPROTEIN_PARTICLE(high) THEN LGG	2	0.891	28	2.48695337866851e-07
IF INTERMEDIATE_DENSITY_LIPOPROTEIN_PARTICLE(low) AND KINESIN_COMPLEX(low) THEN GBM	2	0.91681	26	2.48695337866851e-07
IF RNA_POLYMERASE_II_CORE_COMPLEX(high) AND TRIGLYCERIDE_RICH_PLASMA_LIPOPROTEIN_PARTICLE(low) THEN GBM	2	0.89655	26	2.48695337866851e-07
IF CHYLOMICRON(high) AND MICROTUBULE_ORGANIZING_CENTER(high) THEN LGG	2	0.92895	24	2.48695337866851e-07
IF PYRUVATE_DEHYDROGENASE_COMPLEX(low) AND RESPIRATORY_CHAIN_COMPLEX_II(low) THEN LGG	2	0.90444	24	2.48695337866851e-07
IF KINESIN_COMPLEX(high) AND LAMELLAR_BODY(high) THEN LGG	2	0.92308	24	2.48695337866851e-07
IF RNA_POLYMERASE_II_CORE_COMPLEX(low) AND PYRUVATE_DEHYDROGENASE_COMPLEX(low) THEN LGG	2	0.89655	26	2.48695337866851e-07
IF RNA_POLYMERASE_II_CORE_COMPLEX(low) AND CHYLOMICRON(high) THEN LGG	2	0.92911	24	2.48695337866851e-07
IF SPHERICAL_HIGH_DENSITY_LIPOPROTEIN_PARTICLE(high) AND PYRUVATE_DEHYDROGENASE_COMPLEX(low) THEN LGG	2	0.92308	24	2.48695337866851e-07
IF INTERMEDIATE_DENSITY_LIPOPROTEIN_PARTICLE(low) AND VACUOLE(high) THEN GBM	2	0.95953	21	4.77298444064295e-07
IF MICROTUBULE_MINUS_END(low) AND LAMELLAR_BODY(medium) THEN GBM	2	0.90882	25	4.77298444064295e-07
IF SPHERICAL_HIGH_DENSITY_LIPOPROTEIN_PARTICLE(high) AND KINESIN_COMPLEX(high) THEN LGG	2	0.91157	23	4.77298444064295e-07
IF CHYLOMICRON(high) AND HEMIDESMOSOME(medium) THEN LGG	2	0.94173	21	4.77298444064295e-07
IF LYSOSOMAL_LUMEN(low) AND LAMELLAR_BODY(high) THEN LGG	2	0.92846	21	4.77298444064295e-07
IF PYRUVATE_DEHYDROGENASE_COMPLEX(low) AND TRIGLYCERIDE_RICH_PLASMA_LIPOPROTEIN_PARTICLE(high) THEN LGG	2	0.91849	23	4.77298444064295e-07
IF INTERMEDIATE_DENSITY_LIPOPROTEIN_PARTICLE(low) AND MICROTUBULE_ORGANIZING_CENTER(low) THEN GBM	2	0.91233	23	4.77298444064295e-07
IF CHYLOMICRON(high) AND SPHERICAL_HIGH_DENSITY_LIPOPROTEIN_PARTICLE(medium) THEN LGG	2	0.92075	23	4.77298444064295e-07
IF SPHERICAL_HIGH_DENSITY_LIPOPROTEIN_PARTICLE(low) AND GLYCOSYLPHOSPHATIDYLINOSITOL_N_ACETYLGLUCOSAMINYLTRANSFERASE_GPI_GNT_COMPLEX(high) THEN GBM	2	0.91024	25	4.77298444064295e-07
IF CHYLOMICRON(high) AND GLYCOSYLPHOSPHATIDYLINOSITOL_N_ACETYLGLUCOSAMINYLTRANSFERASE_GPI_GNT_COMPLEX(low) THEN LGG	2	0.93441	23	4.77298444064295e-07
IF GLYCOSYLPHOSPHATIDYLINOSITOL_N_ACETYLGLUCOSAMINYLTRANSFERASE_GPI_GNT_COMPLEX(low) AND LYSOSOMAL_LUMEN(low) THEN LGG	2	0.87561	25	4.77298444064295e-07
IF TRIGLYCERIDE_RICH_PLASMA_LIPOPROTEIN_PARTICLE(high) AND RESPIRATORY_CHAIN_COMPLEX_II(low) THEN LGG	2	0.90181	23	4.77298444064295e-07
IF RNA_POLYMERASE_II_CORE_COMPLEX(low) AND MICROTUBULE_MINUS_END(high) THEN LGG	2	0.90426	25	4.77298444064295e-07
IF TRIGLYCERIDE_RICH_PLASMA_LIPOPROTEIN_PARTICLE(high) AND ANAPHASE_PROMOTING_COMPLEX(low) THEN LGG	2	0.89286	25	4.77298444064295e-07
IF PYRUVATE_DEHYDROGENASE_COMPLEX(low) AND VACUOLE(low) THEN LGG	2	0.90709	23	4.77298444064295e-07
IF CHYLOMICRON(low) AND GLYCOSYLPHOSPHATIDYLINOSITOL_N_ACETYLGLUCOSAMINYLTRANSFERASE_GPI_GNT_COMPLEX(high) THEN GBM	2	0.89286	25	4.77298444064295e-07
IF INTERMEDIATE_DENSITY_LIPOPROTEIN_PARTICLE(low) AND GLYCOSYLPHOSPHATIDYLINOSITOL_N_ACETYLGLUCOSAMINYLTRANSFERASE_GPI_GNT_COMPLEX(high) THEN GBM	2	0.89286	25	4.77298444064295e-07
IF INTERMEDIATE_DENSITY_LIPOPROTEIN_PARTICLE(high) AND HEMIDESMOSOME(medium) THEN LGG	2	0.90873	25	4.77298444064295e-07
IF MICROTUBULE_MINUS_END(high) AND MICROTUBULE_ORGANIZING_CENTER(high) THEN LGG	2	0.87791	26	8.12439324849994e-07
IF SPHERICAL_HIGH_DENSITY_LIPOPROTEIN_PARTICLE(high) AND MICROTUBULE_ORGANIZING_CENTER(high) THEN LGG	2	0.88135	26	8.12439324849994e-07
IF TRIGLYCERIDE_RICH_PLASMA_LIPOPROTEIN_PARTICLE(low) AND MITOCHONDRIAL_ALPHA_KETOGLUTARATE_DEHYDROGENASE_COMPLEX(low) THEN GBM	2	0.83567	26	8.12439324849994e-07
IF KINESIN_COMPLEX(high) AND RESPIRATORY_CHAIN_COMPLEX_II(low) THEN LGG	2	0.88678	26	8.12439324849994e-07
IF LOW_DENSITY_LIPOPROTEIN_PARTICLE(low) AND MITOCHONDRIAL_ALPHA_KETOGLUTARATE_DEHYDROGENASE_COMPLEX(low) THEN GBM	2	0.88262	26	8.12439324849994e-07
IF GLYCOSYLPHOSPHATIDYLINOSITOL_N_ACETYLGLUCOSAMINYLTRANSFERASE_GPI_GNT_COMPLEX(low) AND VACUOLE(low) THEN LGG	2	0.86541	26	8.12439324849994e-07
IF KINESIN_COMPLEX(high) AND TRIGLYCERIDE_RICH_PLASMA_LIPOPROTEIN_PARTICLE(high) THEN LGG	2	0.91429	20	9.23685912793565e-07
IF KINESIN_COMPLEX(high) AND PROTEIN_DNA_COMPLEX(low) THEN LGG	2	0.9377	20	9.23685912793565e-07
IF PYRUVATE_DEHYDROGENASE_COMPLEX(low) AND MICROTUBULE_MINUS_END(high) THEN LGG	2	0.94917	20	9.23685912793565e-07
IF SPHERICAL_HIGH_DENSITY_LIPOPROTEIN_PARTICLE(low) AND LYSOSOMAL_LUMEN(medium) THEN GBM	2	0.92661	22	9.34287779953341e-07
IF CHYLOMICRON(high) AND KINESIN_COMPLEX(high) THEN LGG	2	0.94347	22	9.34287779953341e-07
IF CHYLOMICRON(high) AND LYSOSOMAL_LUMEN(low) THEN LGG	2	0.91828	22	9.34287779953341e-07
IF LYSOSOMAL_LUMEN(low) AND RESPIRATORY_CHAIN_COMPLEX_II(low) THEN LGG	2	0.90211	22	9.34287779953341e-07
IF LOW_DENSITY_LIPOPROTEIN_PARTICLE(high) AND LAMELLAR_BODY(high) THEN LGG	2	0.92359	22	9.34287779953341e-07
IF SPHERICAL_HIGH_DENSITY_LIPOPROTEIN_PARTICLE(low) AND HEMIDESMOSOME(low) THEN GBM	2	0.88767	24	9.34287779953341e-07
IF INTERMEDIATE_DENSITY_LIPOPROTEIN_PARTICLE(high) AND LYSOSOMAL_LUMEN(low) THEN LGG	2	0.89172	24	9.34287779953341e-07
IF SPHERICAL_HIGH_DENSITY_LIPOPROTEIN_PARTICLE(low) AND MICROTUBULE_ORGANIZING_CENTER(medium) THEN GBM	2	0.88634	24	9.34287779953341e-07
IF LOW_DENSITY_LIPOPROTEIN_PARTICLE(high) AND MICROTUBULE_MINUS_END(high) THEN LGG	2	0.89292	24	9.34287779953341e-07
IF SPHERICAL_HIGH_DENSITY_LIPOPROTEIN_PARTICLE(high) AND LYSOSOMAL_LUMEN(low) THEN LGG	2	0.89712	22	9.34287779953341e-07
IF GLYCOSYLPHOSPHATIDYLINOSITOL_N_ACETYLGLUCOSAMINYLTRANSFERASE_GPI_GNT_COMPLEX(low) AND LAMELLAR_BODY(high) THEN LGG	2	0.93826	22	9.34287779953341e-07
IF RNA_POLYMERASE_II_CORE_COMPLEX(low) AND PROTEIN_DNA_COMPLEX(low) THEN LGG	2	0.8975	22	9.34287779953341e-07
IF SPHERICAL_HIGH_DENSITY_LIPOPROTEIN_PARTICLE(low) AND ANAPHASE_PROMOTING_COMPLEX(medium) THEN GBM	2	0.92393	19	1.85947435356123e-06
IF GLYCOSYLPHOSPHATIDYLINOSITOL_N_ACETYLGLUCOSAMINYLTRANSFERASE_GPI_GNT_COMPLEX(low) AND LOW_DENSITY_LIPOPROTEIN_PARTICLE(high) THEN LGG	2	0.88366	23	1.85947435356123e-06
IF RESPIRATORY_CHAIN_COMPLEX_II(medium) AND LAMELLAR_BODY(high) THEN LGG	2	0.94765	19	1.85947435356123e-06
IF KINESIN_COMPLEX(high) AND MITOCHONDRIAL_ALPHA_KETOGLUTARATE_DEHYDROGENASE_COMPLEX(high) THEN LGG	2	0.90963	19	1.85947435356123e-06
IF INTERMEDIATE_DENSITY_LIPOPROTEIN_PARTICLE(high) AND VACUOLE(low) THEN LGG	2	0.90293	23	1.85947435356123e-06
IF INTERMEDIATE_DENSITY_LIPOPROTEIN_PARTICLE(high) AND MICROTUBULE_MINUS_END(high) THEN LGG	2	0.90822	23	1.85947435356123e-06
IF TRIGLYCERIDE_RICH_PLASMA_LIPOPROTEIN_PARTICLE(high) AND MICROTUBULE_MINUS_END(high) THEN LGG	2	0.88143	23	1.85947435356123e-06
IF GLYCOSYLPHOSPHATIDYLINOSITOL_N_ACETYLGLUCOSAMINYLTRANSFERASE_GPI_GNT_COMPLEX(low) AND PYRUVATE_DEHYDROGENASE_COMPLEX(low) THEN LGG	2	0.89127	23	1.85947435356123e-06
IF RNA_POLYMERASE_II_CORE_COMPLEX(low) AND TRIGLYCERIDE_RICH_PLASMA_LIPOPROTEIN_PARTICLE(high) THEN LGG	2	0.90537	23	1.85947435356123e-06
IF VACUOLE(low) AND MICROTUBULE_MINUS_END(high) THEN LGG	2	0.88462	23	1.85947435356123e-06
IF VACUOLE(high) AND MICROTUBULE_MINUS_END(low) THEN GBM	2	0.88462	23	1.85947435356123e-06
IF GLYCOSYLPHOSPHATIDYLINOSITOL_N_ACETYLGLUCOSAMINYLTRANSFERASE_GPI_GNT_COMPLEX(low) AND TRIGLYCERIDE_RICH_PLASMA_LIPOPROTEIN_PARTICLE(medium) THEN LGG	2	0.88462	23	1.85947435356123e-06
IF INTERMEDIATE_DENSITY_LIPOPROTEIN_PARTICLE(low) AND LYSOSOMAL_LUMEN(high) THEN GBM	2	0.90645	21	1.92109674612833e-06
IF INTERMEDIATE_DENSITY_LIPOPROTEIN_PARTICLE(low) AND LYSOSOMAL_LUMEN(medium) THEN GBM	2	0.91176	21	1.92109674612833e-06
IF MITOCHONDRIAL_ALPHA_KETOGLUTARATE_DEHYDROGENASE_COMPLEX(high) AND LAMELLAR_BODY(high) THEN LGG	2	0.92923	21	1.92109674612833e-06
IF INTERMEDIATE_DENSITY_LIPOPROTEIN_PARTICLE(low) AND PROTEIN_DNA_COMPLEX(high) THEN GBM	2	0.89671	21	1.92109674612833e-06
IF CHYLOMICRON(high) AND MITOCHONDRIAL_ALPHA_KETOGLUTARATE_DEHYDROGENASE_COMPLEX(high) THEN LGG	2	0.92231	21	1.92109674612833e-06
IF SPHERICAL_HIGH_DENSITY_LIPOPROTEIN_PARTICLE(medium) AND KINESIN_COMPLEX(high) THEN LGG	2	0.8973	21	1.92109674612833e-06
IF CHYLOMICRON(high) AND ANAPHASE_PROMOTING_COMPLEX(low) THEN LGG	2	0.91506	21	1.92109674612833e-06
IF CHYLOMICRON(high) AND VACUOLE(low) THEN LGG	2	0.88565	21	1.92109674612833e-06
IF MICROTUBULE_MINUS_END(low) AND HEMIDESMOSOME(low) THEN GBM	2	0.87712	24	3.17872375809327e-06
IF SPHERICAL_HIGH_DENSITY_LIPOPROTEIN_PARTICLE(low) AND PYRUVATE_DEHYDROGENASE_COMPLEX(high) THEN GBM	2	0.875	24	3.17872375809327e-06
IF PROTEIN_DNA_COMPLEX(high) AND MITOCHONDRIAL_ALPHA_KETOGLUTARATE_DEHYDROGENASE_COMPLEX(low) THEN GBM	2	0.87652	22	3.84149188635238e-06
IF MICROTUBULE_MINUS_END(high) AND LAMELLAR_BODY(high) THEN LGG	2	0.88402	22	3.84149188635238e-06
IF PYRUVATE_DEHYDROGENASE_COMPLEX(low) AND HEMIDESMOSOME(high) THEN LGG	2	0.88259	22	3.84149188635238e-06
IF LOW_DENSITY_LIPOPROTEIN_PARTICLE(low) AND MICROTUBULE_ORGANIZING_CENTER(medium) THEN GBM	2	0.8885	22	3.84149188635238e-06
IF GLYCOSYLPHOSPHATIDYLINOSITOL_N_ACETYLGLUCOSAMINYLTRANSFERASE_GPI_GNT_COMPLEX(low) AND MITOCHONDRIAL_ALPHA_KETOGLUTARATE_DEHYDROGENASE_COMPLEX(high) THEN LGG	2	0.87494	22	3.84149188635238e-06
IF VACUOLE(low) AND MITOCHONDRIAL_ALPHA_KETOGLUTARATE_DEHYDROGENASE_COMPLEX(medium) THEN LGG	2	0.87996	22	3.84149188635238e-06
IF GLYCOSYLPHOSPHATIDYLINOSITOL_N_ACETYLGLUCOSAMINYLTRANSFERASE_GPI_GNT_COMPLEX(low) AND ANAPHASE_PROMOTING_COMPLEX(low) THEN LGG	2	0.88	22	3.84149188635238e-06
IF GLYCOSYLPHOSPHATIDYLINOSITOL_N_ACETYLGLUCOSAMINYLTRANSFERASE_GPI_GNT_COMPLEX(low) AND HEMIDESMOSOME(high) THEN LGG	2	0.86	22	3.84149188635238e-06
IF INTERMEDIATE_DENSITY_LIPOPROTEIN_PARTICLE(low) AND ANAPHASE_PROMOTING_COMPLEX(medium) THEN GBM	2	0.91153	18	3.87767746624331e-06
IF PROTEIN_DNA_COMPLEX(low) AND MICROTUBULE_MINUS_END(high) THEN LGG	2	0.9199	18	3.87767746624331e-06
IF VACUOLE(low) AND LAMELLAR_BODY(high) THEN LGG	2	0.94737	18	3.87767746624331e-06
IF LOW_DENSITY_LIPOPROTEIN_PARTICLE(high) AND MITOCHONDRIAL_ALPHA_KETOGLUTARATE_DEHYDROGENASE_COMPLEX(medium) THEN LGG	2	0.89331	20	4.03148804093067e-06
IF INTERMEDIATE_DENSITY_LIPOPROTEIN_PARTICLE(low) AND GLYCOSYLPHOSPHATIDYLINOSITOL_N_ACETYLGLUCOSAMINYLTRANSFERASE_GPI_GNT_COMPLEX(medium) THEN GBM	2	0.87478	20	4.03148804093067e-06
IF CHYLOMICRON(low) AND LYSOSOMAL_LUMEN(medium) THEN GBM	2	0.90125	20	4.03148804093067e-06
IF TRIGLYCERIDE_RICH_PLASMA_LIPOPROTEIN_PARTICLE(high) AND VACUOLE(low) THEN LGG	2	0.93867	20	4.03148804093067e-06
IF RNA_POLYMERASE_II_CORE_COMPLEX(medium) AND VACUOLE(high) THEN GBM	2	0.88509	20	4.03148804093067e-06
IF MICROTUBULE_ORGANIZING_CENTER(medium) AND LAMELLAR_BODY(medium) THEN GBM	2	0.90909	20	4.03148804093067e-06
IF LOW_DENSITY_LIPOPROTEIN_PARTICLE(low) AND LYSOSOMAL_LUMEN(medium) THEN GBM	2	0.90909	20	4.03148804093067e-06
IF KINESIN_COMPLEX(medium) AND LAMELLAR_BODY(medium) THEN GBM	2	0.84923	23	6.37531102728918e-06
IF GLYCOSYLPHOSPHATIDYLINOSITOL_N_ACETYLGLUCOSAMINYLTRANSFERASE_GPI_GNT_COMPLEX(low) AND PROTEIN_DNA_COMPLEX(low) THEN LGG	2	0.87221	23	6.37531102728918e-06
IF TRIGLYCERIDE_RICH_PLASMA_LIPOPROTEIN_PARTICLE(low) AND PROTEIN_DNA_COMPLEX(medium) THEN GBM	2	0.8573	21	7.58185915506495e-06
IF CHYLOMICRON(low) AND MITOCHONDRIAL_ALPHA_KETOGLUTARATE_DEHYDROGENASE_COMPLEX(low) THEN GBM	2	0.87413	21	7.58185915506495e-06
IF KINESIN_COMPLEX(high) AND HEMIDESMOSOME(high) THEN LGG	2	0.90445	21	7.58185915506495e-06
IF INTERMEDIATE_DENSITY_LIPOPROTEIN_PARTICLE(low) AND LAMELLAR_BODY(low) THEN GBM	2	0.88328	21	7.58185915506495e-06
IF PYRUVATE_DEHYDROGENASE_COMPLEX(low) AND MICROTUBULE_ORGANIZING_CENTER(high) THEN LGG	2	0.89214	21	7.58185915506495e-06
IF SPHERICAL_HIGH_DENSITY_LIPOPROTEIN_PARTICLE(low) AND PROTEIN_DNA_COMPLEX(high) THEN GBM	2	0.86404	21	7.58185915506495e-06
IF TRIGLYCERIDE_RICH_PLASMA_LIPOPROTEIN_PARTICLE(low) AND ANAPHASE_PROMOTING_COMPLEX(medium) THEN GBM	2	0.87585	21	7.58185915506495e-06
IF LYSOSOMAL_LUMEN(medium) AND MICROTUBULE_MINUS_END(low) THEN GBM	2	0.86416	21	7.58185915506495e-06
IF SPHERICAL_HIGH_DENSITY_LIPOPROTEIN_PARTICLE(high) AND MITOCHONDRIAL_ALPHA_KETOGLUTARATE_DEHYDROGENASE_COMPLEX(high) THEN LGG	2	0.87927	21	7.58185915506495e-06
IF TRIGLYCERIDE_RICH_PLASMA_LIPOPROTEIN_PARTICLE(high) AND LYSOSOMAL_LUMEN(low) THEN LGG	2	0.88447	21	7.58185915506495e-06
IF CHYLOMICRON(high) AND MICROTUBULE_MINUS_END(high) THEN LGG	2	0.89182	21	7.58185915506495e-06
IF RNA_POLYMERASE_II_CORE_COMPLEX(low) AND LAMELLAR_BODY(high) THEN LGG	2	0.88768	21	7.58185915506495e-06
IF SPHERICAL_HIGH_DENSITY_LIPOPROTEIN_PARTICLE(high) AND MICROTUBULE_MINUS_END(high) THEN LGG	2	0.86357	21	7.58185915506495e-06
IF GLYCOSYLPHOSPHATIDYLINOSITOL_N_ACETYLGLUCOSAMINYLTRANSFERASE_GPI_GNT_COMPLEX(high) AND MICROTUBULE_MINUS_END(low) THEN GBM	2	0.86391	21	7.58185915506495e-06
IF INTERMEDIATE_DENSITY_LIPOPROTEIN_PARTICLE(high) AND RESPIRATORY_CHAIN_COMPLEX_II(medium) THEN LGG	2	0.93173	19	8.08482953876401e-06
IF INTERMEDIATE_DENSITY_LIPOPROTEIN_PARTICLE(high) AND HEMIDESMOSOME(high) THEN LGG	2	0.90973	19	8.08482953876401e-06
IF INTERMEDIATE_DENSITY_LIPOPROTEIN_PARTICLE(low) AND KINESIN_COMPLEX(medium) THEN GBM	2	0.86683	19	8.08482953876401e-06
IF CHYLOMICRON(low) AND PYRUVATE_DEHYDROGENASE_COMPLEX(medium) THEN GBM	2	0.90476	19	8.08482953876401e-06
IF RNA_POLYMERASE_II_CORE_COMPLEX(high) AND LAMELLAR_BODY(medium) THEN GBM	2	0.8823	19	8.08482953876401e-06
IF CHYLOMICRON(high) AND ANAPHASE_PROMOTING_COMPLEX(high) THEN LGG	2	0.92761	19	8.08482953876401e-06
IF LOW_DENSITY_LIPOPROTEIN_PARTICLE(high) AND HEMIDESMOSOME(high) THEN LGG	2	0.89119	19	8.08482953876401e-06
IF LOW_DENSITY_LIPOPROTEIN_PARTICLE(high) AND ANAPHASE_PROMOTING_COMPLEX(low) THEN LGG	2	0.91259	17	8.08482953876401e-06
IF SPHERICAL_HIGH_DENSITY_LIPOPROTEIN_PARTICLE(low) AND LOW_DENSITY_LIPOPROTEIN_PARTICLE(medium) THEN GBM	2	0.88694	19	8.08482953876401e-06
IF CHYLOMICRON(high) AND MICROTUBULE_MINUS_END(medium) THEN LGG	2	0.88331	19	8.08482953876401e-06
IF ANAPHASE_PROMOTING_COMPLEX(high) AND MICROTUBULE_MINUS_END(high) THEN LGG	2	0.88251	19	8.08482953876401e-06
IF SPHERICAL_HIGH_DENSITY_LIPOPROTEIN_PARTICLE(high) AND LAMELLAR_BODY(high) THEN LGG	2	0.88936	19	8.08482953876401e-06
IF INTERMEDIATE_DENSITY_LIPOPROTEIN_PARTICLE(medium) AND MICROTUBULE_MINUS_END(high) THEN LGG	2	0.94444	17	8.08482953876401e-06
IF SPHERICAL_HIGH_DENSITY_LIPOPROTEIN_PARTICLE(low) AND MITOCHONDRIAL_ALPHA_KETOGLUTARATE_DEHYDROGENASE_COMPLEX(low) THEN GBM	2	0.87282	22	1.19771959063918e-05
IF HEMIDESMOSOME(high) AND LAMELLAR_BODY(high) THEN LGG	2	0.86164	22	1.19771959063918e-05
IF SPHERICAL_HIGH_DENSITY_LIPOPROTEIN_PARTICLE(high) AND PROTEIN_DNA_COMPLEX(low) THEN LGG	2	0.84308	22	1.19771959063918e-05
IF CHYLOMICRON(low) AND MICROTUBULE_ORGANIZING_CENTER(low) THEN GBM	2	0.84821	22	1.19771959063918e-05
IF VACUOLE(high) AND MITOCHONDRIAL_ALPHA_KETOGLUTARATE_DEHYDROGENASE_COMPLEX(low) THEN GBM	2	0.82061	22	1.19771959063918e-05
IF LOW_DENSITY_LIPOPROTEIN_PARTICLE(low) AND VACUOLE(high) THEN GBM	2	0.899	20	1.50654411254227e-05
IF INTERMEDIATE_DENSITY_LIPOPROTEIN_PARTICLE(high) AND MITOCHONDRIAL_ALPHA_KETOGLUTARATE_DEHYDROGENASE_COMPLEX(high) THEN LGG	2	0.89418	20	1.50654411254227e-05
IF CHYLOMICRON(high) AND MITOCHONDRIAL_ALPHA_KETOGLUTARATE_DEHYDROGENASE_COMPLEX(medium) THEN LGG	2	0.88736	20	1.50654411254227e-05
IF TRIGLYCERIDE_RICH_PLASMA_LIPOPROTEIN_PARTICLE(low) AND VACUOLE(high) THEN GBM	2	0.86928	20	1.50654411254227e-05
IF LYSOSOMAL_LUMEN(low) AND PROTEIN_DNA_COMPLEX(low) THEN LGG	2	0.83587	20	1.50654411254227e-05
IF LOW_DENSITY_LIPOPROTEIN_PARTICLE(low) AND RESPIRATORY_CHAIN_COMPLEX_II(high) THEN GBM	2	0.85639	20	1.50654411254227e-05
IF SPHERICAL_HIGH_DENSITY_LIPOPROTEIN_PARTICLE(low) AND KINESIN_COMPLEX(medium) THEN GBM	2	0.88365	20	1.50654411254227e-05
IF MICROTUBULE_MINUS_END(high) AND MITOCHONDRIAL_ALPHA_KETOGLUTARATE_DEHYDROGENASE_COMPLEX(high) THEN LGG	2	0.85785	20	1.50654411254227e-05
IF VACUOLE(medium) AND LAMELLAR_BODY(high) THEN LGG	2	0.86874	20	1.50654411254227e-05
IF SPHERICAL_HIGH_DENSITY_LIPOPROTEIN_PARTICLE(high) AND MITOCHONDRIAL_ALPHA_KETOGLUTARATE_DEHYDROGENASE_COMPLEX(medium) THEN LGG	2	0.86957	20	1.50654411254227e-05
IF CHYLOMICRON(low) AND KINESIN_COMPLEX(medium) THEN GBM	2	0.88785	18	1.62159485638446e-05
IF MICROTUBULE_MINUS_END(high) AND MITOCHONDRIAL_ALPHA_KETOGLUTARATE_DEHYDROGENASE_COMPLEX(medium) THEN LGG	2	0.86915	18	1.62159485638446e-05
IF INTERMEDIATE_DENSITY_LIPOPROTEIN_PARTICLE(low) AND LOW_DENSITY_LIPOPROTEIN_PARTICLE(medium) THEN GBM	2	0.90302	18	1.62159485638446e-05
IF CHYLOMICRON(low) AND VACUOLE(medium) THEN GBM	2	0.83664	23	1.62159485638446e-05
IF RNA_POLYMERASE_II_CORE_COMPLEX(medium) AND KINESIN_COMPLEX(high) THEN LGG	2	0.90746	18	1.62159485638446e-05
IF CHYLOMICRON(high) AND RESPIRATORY_CHAIN_COMPLEX_II(medium) THEN LGG	2	0.88992	18	1.62159485638446e-05
IF CHYLOMICRON(medium) AND KINESIN_COMPLEX(low) THEN GBM	2	0.88407	18	1.62159485638446e-05
IF LOW_DENSITY_LIPOPROTEIN_PARTICLE(high) AND VACUOLE(low) THEN LGG	2	0.90226	18	1.62159485638446e-05
IF RNA_POLYMERASE_II_CORE_COMPLEX(high) AND MICROTUBULE_ORGANIZING_CENTER(medium) THEN GBM	2	0.88609	18	1.62159485638446e-05
IF LYSOSOMAL_LUMEN(low) AND MICROTUBULE_MINUS_END(high) THEN LGG	2	0.84222	23	1.62159485638446e-05
IF INTERMEDIATE_DENSITY_LIPOPROTEIN_PARTICLE(high) AND ANAPHASE_PROMOTING_COMPLEX(low) THEN LGG	2	0.86853	18	1.62159485638446e-05
IF SPHERICAL_HIGH_DENSITY_LIPOPROTEIN_PARTICLE(low) AND MICROTUBULE_MINUS_END(medium) THEN GBM	2	0.8957	18	1.62159485638446e-05
IF SPHERICAL_HIGH_DENSITY_LIPOPROTEIN_PARTICLE(low) AND RESPIRATORY_CHAIN_COMPLEX_II(medium) THEN GBM	2	0.9	18	1.62159485638446e-05
IF SPHERICAL_HIGH_DENSITY_LIPOPROTEIN_PARTICLE(medium) AND PYRUVATE_DEHYDROGENASE_COMPLEX(low) THEN LGG	2	0.85357	18	1.62159485638446e-05
IF INTERMEDIATE_DENSITY_LIPOPROTEIN_PARTICLE(low) AND MICROTUBULE_MINUS_END(medium) THEN GBM	2	0.86652	18	1.62159485638446e-05
IF MICROTUBULE_ORGANIZING_CENTER(low) AND MITOCHONDRIAL_ALPHA_KETOGLUTARATE_DEHYDROGENASE_COMPLEX(low) THEN GBM	2	0.82186	23	1.62159485638446e-05
IF TRIGLYCERIDE_RICH_PLASMA_LIPOPROTEIN_PARTICLE(medium) AND MICROTUBULE_ORGANIZING_CENTER(high) THEN LGG	2	0.9	18	1.62159485638446e-05
IF INTERMEDIATE_DENSITY_LIPOPROTEIN_PARTICLE(medium) AND KINESIN_COMPLEX(high) THEN LGG	2	0.9	18	1.62159485638446e-05
IF SPHERICAL_HIGH_DENSITY_LIPOPROTEIN_PARTICLE(low) AND LYSOSOMAL_LUMEN(high) THEN GBM	2	0.8496	21	2.31516670344622e-05
IF RESPIRATORY_CHAIN_COMPLEX_II(high) AND VACUOLE(high) THEN GBM	2	0.84239	21	2.31516670344622e-05
IF GLYCOSYLPHOSPHATIDYLINOSITOL_N_ACETYLGLUCOSAMINYLTRANSFERASE_GPI_GNT_COMPLEX(high) AND LOW_DENSITY_LIPOPROTEIN_PARTICLE(low) THEN GBM	2	0.83974	21	2.31516670344622e-05
IF INTERMEDIATE_DENSITY_LIPOPROTEIN_PARTICLE(low) AND VACUOLE(medium) THEN GBM	2	0.87427	19	2.98692666248775e-05
IF ANAPHASE_PROMOTING_COMPLEX(low) AND VACUOLE(low) THEN LGG	2	0.85123	19	2.98692666248775e-05
IF PYRUVATE_DEHYDROGENASE_COMPLEX(low) AND LYSOSOMAL_LUMEN(low) THEN LGG	2	0.86364	19	2.98692666248775e-05
IF LOW_DENSITY_LIPOPROTEIN_PARTICLE(low) AND KINESIN_COMPLEX(medium) THEN GBM	2	0.87453	19	2.98692666248775e-05
IF CHYLOMICRON(low) AND VACUOLE(high) THEN GBM	2	0.86273	19	2.98692666248775e-05
IF SPHERICAL_HIGH_DENSITY_LIPOPROTEIN_PARTICLE(low) AND ANAPHASE_PROMOTING_COMPLEX(high) THEN GBM	2	0.86364	19	2.98692666248775e-05
IF LYSOSOMAL_LUMEN(medium) AND LAMELLAR_BODY(medium) THEN GBM	2	0.8625	19	2.98692666248775e-05
IF CHYLOMICRON(low) AND MICROTUBULE_MINUS_END(medium) THEN GBM	2	0.86364	19	2.98692666248775e-05
IF RNA_POLYMERASE_II_CORE_COMPLEX(low) AND HEMIDESMOSOME(high) THEN LGG	2	0.86364	19	2.98692666248775e-05
IF SPHERICAL_HIGH_DENSITY_LIPOPROTEIN_PARTICLE(high) AND VACUOLE(low) THEN LGG	2	0.86364	19	2.98692666248775e-05
IF GLYCOSYLPHOSPHATIDYLINOSITOL_N_ACETYLGLUCOSAMINYLTRANSFERASE_GPI_GNT_COMPLEX(high) AND MITOCHONDRIAL_ALPHA_KETOGLUTARATE_DEHYDROGENASE_COMPLEX(low) THEN GBM	2	0.82081	22	3.35748857502324e-05
IF KINESIN_COMPLEX(medium) AND TRIGLYCERIDE_RICH_PLASMA_LIPOPROTEIN_PARTICLE(low) THEN GBM	2	0.89769	17	3.43926262570367e-05
IF LOW_DENSITY_LIPOPROTEIN_PARTICLE(high) AND RESPIRATORY_CHAIN_COMPLEX_II(medium) THEN LGG	2	0.88202	17	3.43926262570367e-05
IF TRIGLYCERIDE_RICH_PLASMA_LIPOPROTEIN_PARTICLE(high) AND HEMIDESMOSOME(medium) THEN LGG	2	0.90304	17	3.43926262570367e-05
IF INTERMEDIATE_DENSITY_LIPOPROTEIN_PARTICLE(high) AND LYSOSOMAL_LUMEN(high) THEN LGG	2	0.88324	17	3.43926262570367e-05
IF RNA_POLYMERASE_II_CORE_COMPLEX(medium) AND CHYLOMICRON(high) THEN LGG	2	0.89485	17	3.43926262570367e-05
IF KINESIN_COMPLEX(medium) AND TRIGLYCERIDE_RICH_PLASMA_LIPOPROTEIN_PARTICLE(high) THEN LGG	2	0.88655	17	3.43926262570367e-05
IF GLYCOSYLPHOSPHATIDYLINOSITOL_N_ACETYLGLUCOSAMINYLTRANSFERASE_GPI_GNT_COMPLEX(medium) AND LAMELLAR_BODY(medium) THEN GBM	2	0.88043	17	3.43926262570367e-05
IF KINESIN_COMPLEX(high) AND PROTEIN_DNA_COMPLEX(high) THEN LGG	2	0.89474	17	3.43926262570367e-05
IF INTERMEDIATE_DENSITY_LIPOPROTEIN_PARTICLE(high) AND LAMELLAR_BODY(low) THEN LGG	2	0.86546	17	3.43926262570367e-05
IF LOW_DENSITY_LIPOPROTEIN_PARTICLE(high) AND TRIGLYCERIDE_RICH_PLASMA_LIPOPROTEIN_PARTICLE(medium) THEN LGG	2	0.89474	17	3.43926262570367e-05
IF SPHERICAL_HIGH_DENSITY_LIPOPROTEIN_PARTICLE(high) AND GLYCOSYLPHOSPHATIDYLINOSITOL_N_ACETYLGLUCOSAMINYLTRANSFERASE_GPI_GNT_COMPLEX(high) THEN LGG	2	0.93856	15	3.43926262570367e-05
IF RESPIRATORY_CHAIN_COMPLEX_II(high) AND MITOCHONDRIAL_ALPHA_KETOGLUTARATE_DEHYDROGENASE_COMPLEX(low) THEN GBM	2	0.82196	20	4.44593878446701e-05
IF RESPIRATORY_CHAIN_COMPLEX_II(high) AND ANAPHASE_PROMOTING_COMPLEX(high) THEN GBM	2	0.83687	20	4.44593878446701e-05
IF RNA_POLYMERASE_II_CORE_COMPLEX(high) AND MICROTUBULE_ORGANIZING_CENTER(low) THEN GBM	2	0.85417	20	4.44593878446701e-05
IF SPHERICAL_HIGH_DENSITY_LIPOPROTEIN_PARTICLE(high) AND HEMIDESMOSOME(high) THEN LGG	2	0.85417	20	4.44593878446701e-05
IF MICROTUBULE_ORGANIZING_CENTER(high) AND MITOCHONDRIAL_ALPHA_KETOGLUTARATE_DEHYDROGENASE_COMPLEX(medium) THEN LGG	2	0.83072	20	4.44593878446701e-05
IF SPHERICAL_HIGH_DENSITY_LIPOPROTEIN_PARTICLE(low) AND MITOCHONDRIAL_ALPHA_KETOGLUTARATE_DEHYDROGENASE_COMPLEX(medium) THEN GBM	2	0.83304	20	4.44593878446701e-05
IF LOW_DENSITY_LIPOPROTEIN_PARTICLE(low) AND PROTEIN_DNA_COMPLEX(medium) THEN GBM	2	0.81583	20	4.44593878446701e-05
IF PROTEIN_DNA_COMPLEX(high) AND MICROTUBULE_MINUS_END(low) THEN GBM	2	0.85145	20	4.44593878446701e-05
IF RNA_POLYMERASE_II_CORE_COMPLEX(high) AND MITOCHONDRIAL_ALPHA_KETOGLUTARATE_DEHYDROGENASE_COMPLEX(low) THEN GBM	2	0.83333	20	4.44593878446701e-05
IF SPHERICAL_HIGH_DENSITY_LIPOPROTEIN_PARTICLE(low) AND MICROTUBULE_ORGANIZING_CENTER(low) THEN GBM	2	0.82971	20	4.44593878446701e-05
IF GLYCOSYLPHOSPHATIDYLINOSITOL_N_ACETYLGLUCOSAMINYLTRANSFERASE_GPI_GNT_COMPLEX(high) AND LAMELLAR_BODY(medium) THEN GBM	2	0.85145	20	4.44593878446701e-05
IF TRIGLYCERIDE_RICH_PLASMA_LIPOPROTEIN_PARTICLE(low) AND MICROTUBULE_ORGANIZING_CENTER(medium) THEN GBM	2	0.83478	20	4.44593878446701e-05
IF KINESIN_COMPLEX(low) AND LYSOSOMAL_LUMEN(medium) THEN GBM	2	0.83333	20	4.44593878446701e-05
IF LOW_DENSITY_LIPOPROTEIN_PARTICLE(high) AND VACUOLE(high) THEN LGG	2	0.87376	18	5.78278957285627e-05
IF TRIGLYCERIDE_RICH_PLASMA_LIPOPROTEIN_PARTICLE(low) AND VACUOLE(medium) THEN GBM	2	0.87262	18	5.78278957285627e-05
IF LYSOSOMAL_LUMEN(medium) AND MITOCHONDRIAL_ALPHA_KETOGLUTARATE_DEHYDROGENASE_COMPLEX(low) THEN GBM	2	0.84677	18	5.78278957285627e-05
IF RESPIRATORY_CHAIN_COMPLEX_II(low) AND MITOCHONDRIAL_ALPHA_KETOGLUTARATE_DEHYDROGENASE_COMPLEX(high) THEN LGG	2	0.85714	18	5.78278957285627e-05
IF GLYCOSYLPHOSPHATIDYLINOSITOL_N_ACETYLGLUCOSAMINYLTRANSFERASE_GPI_GNT_COMPLEX(low) AND TRIGLYCERIDE_RICH_PLASMA_LIPOPROTEIN_PARTICLE(high) THEN LGG	2	0.88402	18	5.78278957285627e-05
IF KINESIN_COMPLEX(high) AND ANAPHASE_PROMOTING_COMPLEX(medium) THEN LGG	2	0.85714	18	5.78278957285627e-05
IF SPHERICAL_HIGH_DENSITY_LIPOPROTEIN_PARTICLE(low) AND PROTEIN_DNA_COMPLEX(medium) THEN GBM	2	0.8525	18	5.78278957285627e-05
IF PYRUVATE_DEHYDROGENASE_COMPLEX(high) AND VACUOLE(high) THEN GBM	2	0.83784	18	5.78278957285627e-05
IF ANAPHASE_PROMOTING_COMPLEX(high) AND MICROTUBULE_MINUS_END(low) THEN GBM	2	0.86631	18	5.78278957285627e-05
IF VACUOLE(medium) AND MICROTUBULE_MINUS_END(low) THEN GBM	2	0.8341	18	5.78278957285627e-05
IF SPHERICAL_HIGH_DENSITY_LIPOPROTEIN_PARTICLE(medium) AND MICROTUBULE_MINUS_END(high) THEN LGG	2	0.8425	18	5.78278957285627e-05
IF PROTEIN_DNA_COMPLEX(low) AND MICROTUBULE_ORGANIZING_CENTER(high) THEN LGG	2	0.85714	18	5.78278957285627e-05
IF RNA_POLYMERASE_II_CORE_COMPLEX(medium) AND MICROTUBULE_ORGANIZING_CENTER(high) THEN LGG	2	0.85714	18	5.78278957285627e-05
IF CHYLOMICRON(medium) AND SPHERICAL_HIGH_DENSITY_LIPOPROTEIN_PARTICLE(high) THEN LGG	2	0.85714	18	5.78278957285627e-05
IF KINESIN_COMPLEX(medium) AND MITOCHONDRIAL_ALPHA_KETOGLUTARATE_DEHYDROGENASE_COMPLEX(low) THEN GBM	2	0.81598	21	6.2274038617315e-05
IF INTERMEDIATE_DENSITY_LIPOPROTEIN_PARTICLE(high) AND VACUOLE(medium) THEN LGG	2	0.85465	16	6.91502890859247e-05
IF VACUOLE(medium) AND LAMELLAR_BODY(medium) THEN GBM	2	0.89392	16	6.91502890859247e-05
IF INTERMEDIATE_DENSITY_LIPOPROTEIN_PARTICLE(high) AND RNA_POLYMERASE_II_CORE_COMPLEX(medium) THEN LGG	2	0.87898	16	6.91502890859247e-05
IF INTERMEDIATE_DENSITY_LIPOPROTEIN_PARTICLE(low) AND HEMIDESMOSOME(high) THEN GBM	2	0.83772	16	6.91502890859247e-05
IF INTERMEDIATE_DENSITY_LIPOPROTEIN_PARTICLE(low) AND HEMIDESMOSOME(medium) THEN GBM	2	0.87232	16	6.91502890859247e-05
IF SPHERICAL_HIGH_DENSITY_LIPOPROTEIN_PARTICLE(low) AND PYRUVATE_DEHYDROGENASE_COMPLEX(medium) THEN GBM	2	0.84436	16	6.91502890859247e-05
IF KINESIN_COMPLEX(high) AND HEMIDESMOSOME(medium) THEN LGG	2	0.88889	16	6.91502890859247e-05
IF PROTEIN_DNA_COMPLEX(low) AND MITOCHONDRIAL_ALPHA_KETOGLUTARATE_DEHYDROGENASE_COMPLEX(high) THEN LGG	2	0.86223	16	6.91502890859247e-05
IF INTERMEDIATE_DENSITY_LIPOPROTEIN_PARTICLE(high) AND MICROTUBULE_ORGANIZING_CENTER(medium) THEN LGG	2	0.89462	16	6.91502890859247e-05
IF TRIGLYCERIDE_RICH_PLASMA_LIPOPROTEIN_PARTICLE(high) AND ANAPHASE_PROMOTING_COMPLEX(high) THEN LGG	2	0.93472	14	7.13466388558148e-05
IF ANAPHASE_PROMOTING_COMPLEX(high) AND LAMELLAR_BODY(high) THEN LGG	2	0.90179	14	7.13466388558148e-05
IF LYSOSOMAL_LUMEN(low) AND HEMIDESMOSOME(high) THEN LGG	2	0.78571	22	8.16835190472156e-05
IF MICROTUBULE_MINUS_END(low) AND MITOCHONDRIAL_ALPHA_KETOGLUTARATE_DEHYDROGENASE_COMPLEX(low) THEN GBM	2	0.81921	19	8.54522534867218e-05
IF KINESIN_COMPLEX(low) AND MITOCHONDRIAL_ALPHA_KETOGLUTARATE_DEHYDROGENASE_COMPLEX(low) THEN GBM	2	0.82735	19	8.54522534867218e-05
IF HEMIDESMOSOME(low) AND LAMELLAR_BODY(medium) THEN GBM	2	0.82609	19	8.54522534867218e-05
IF RNA_POLYMERASE_II_CORE_COMPLEX(high) AND VACUOLE(medium) THEN GBM	2	0.81844	19	8.54522534867218e-05
IF KINESIN_COMPLEX(medium) AND ANAPHASE_PROMOTING_COMPLEX(medium) THEN GBM	2	0.82609	19	8.54522534867218e-05
IF LYSOSOMAL_LUMEN(low) AND MITOCHONDRIAL_ALPHA_KETOGLUTARATE_DEHYDROGENASE_COMPLEX(high) THEN LGG	2	0.82411	19	8.54522534867218e-05
IF GLYCOSYLPHOSPHATIDYLINOSITOL_N_ACETYLGLUCOSAMINYLTRANSFERASE_GPI_GNT_COMPLEX(medium) AND RESPIRATORY_CHAIN_COMPLEX_II(high) THEN GBM	2	0.82022	19	8.54522534867218e-05
IF LOW_DENSITY_LIPOPROTEIN_PARTICLE(medium) AND MICROTUBULE_MINUS_END(low) THEN GBM	2	0.82609	19	8.54522534867218e-05
IF PYRUVATE_DEHYDROGENASE_COMPLEX(medium) AND MITOCHONDRIAL_ALPHA_KETOGLUTARATE_DEHYDROGENASE_COMPLEX(low) THEN GBM	2	0.82609	19	8.54522534867218e-05
IF RNA_POLYMERASE_II_CORE_COMPLEX(medium) AND RESPIRATORY_CHAIN_COMPLEX_II(high) THEN GBM	2	0.82609	19	8.54522534867218e-05
IF RESPIRATORY_CHAIN_COMPLEX_II(medium) AND LAMELLAR_BODY(medium) THEN GBM	2	0.82808	17	0.000115235866249059
IF RNA_POLYMERASE_II_CORE_COMPLEX(high) AND LYSOSOMAL_LUMEN(medium) THEN GBM	2	0.86961	17	0.000115235866249059
IF SPHERICAL_HIGH_DENSITY_LIPOPROTEIN_PARTICLE(low) AND LAMELLAR_BODY(low) THEN GBM	2	0.88238	17	0.000115235866249059
IF PYRUVATE_DEHYDROGENASE_COMPLEX(medium) AND TRIGLYCERIDE_RICH_PLASMA_LIPOPROTEIN_PARTICLE(low) THEN GBM	2	0.8307	17	0.000115235866249059
IF MICROTUBULE_MINUS_END(medium) AND MITOCHONDRIAL_ALPHA_KETOGLUTARATE_DEHYDROGENASE_COMPLEX(low) THEN GBM	2	0.85	17	0.000115235866249059
IF PROTEIN_DNA_COMPLEX(high) AND MICROTUBULE_ORGANIZING_CENTER(low) THEN GBM	2	0.84808	17	0.000115235866249059
IF PROTEIN_DNA_COMPLEX(low) AND HEMIDESMOSOME(medium) THEN LGG	2	0.85	17	0.000115235866249059
IF INTERMEDIATE_DENSITY_LIPOPROTEIN_PARTICLE(low) AND PYRUVATE_DEHYDROGENASE_COMPLEX(medium) THEN GBM	2	0.86974	17	0.000115235866249059
IF SPHERICAL_HIGH_DENSITY_LIPOPROTEIN_PARTICLE(low) AND VACUOLE(medium) THEN GBM	2	0.87415	17	0.000115235866249059
IF INTERMEDIATE_DENSITY_LIPOPROTEIN_PARTICLE(medium) AND CHYLOMICRON(high) THEN LGG	2	0.87237	17	0.000115235866249059
IF KINESIN_COMPLEX(medium) AND PYRUVATE_DEHYDROGENASE_COMPLEX(high) THEN GBM	2	0.85	17	0.000115235866249059
IF ANAPHASE_PROMOTING_COMPLEX(medium) AND MITOCHONDRIAL_ALPHA_KETOGLUTARATE_DEHYDROGENASE_COMPLEX(low) THEN GBM	2	0.83118	20	0.000117443205660251
IF RNA_POLYMERASE_II_CORE_COMPLEX(high) AND PYRUVATE_DEHYDROGENASE_COMPLEX(high) THEN GBM	2	0.8	20	0.000117443205660251
IF PYRUVATE_DEHYDROGENASE_COMPLEX(high) AND LAMELLAR_BODY(low) THEN GBM	2	0.81368	20	0.000117443205660251
IF LOW_DENSITY_LIPOPROTEIN_PARTICLE(medium) AND LYSOSOMAL_LUMEN(medium) THEN GBM	2	0.78045	20	0.000117443205660251
IF RNA_POLYMERASE_II_CORE_COMPLEX(medium) AND SPHERICAL_HIGH_DENSITY_LIPOPROTEIN_PARTICLE(low) THEN GBM	2	0.88235	15	0.000141106109768219
IF SPHERICAL_HIGH_DENSITY_LIPOPROTEIN_PARTICLE(low) AND HEMIDESMOSOME(medium) THEN GBM	2	0.86353	15	0.000141106109768219
IF LOW_DENSITY_LIPOPROTEIN_PARTICLE(high) AND PROTEIN_DNA_COMPLEX(medium) THEN LGG	2	0.8792	15	0.000141106109768219
IF INTERMEDIATE_DENSITY_LIPOPROTEIN_PARTICLE(high) AND LOW_DENSITY_LIPOPROTEIN_PARTICLE(medium) THEN LGG	2	0.8897	15	0.000141106109768219
IF INTERMEDIATE_DENSITY_LIPOPROTEIN_PARTICLE(low) AND MITOCHONDRIAL_ALPHA_KETOGLUTARATE_DEHYDROGENASE_COMPLEX(medium) THEN GBM	2	0.87225	15	0.000141106109768219
IF PYRUVATE_DEHYDROGENASE_COMPLEX(low) AND HEMIDESMOSOME(medium) THEN LGG	2	0.88235	15	0.000141106109768219
IF RNA_POLYMERASE_II_CORE_COMPLEX(low) AND LYSOSOMAL_LUMEN(high) THEN LGG	2	0.88235	15	0.000141106109768219
IF LOW_DENSITY_LIPOPROTEIN_PARTICLE(high) AND ANAPHASE_PROMOTING_COMPLEX(high) THEN LGG	2	0.88235	15	0.000141106109768219
IF INTERMEDIATE_DENSITY_LIPOPROTEIN_PARTICLE(high) AND ANAPHASE_PROMOTING_COMPLEX(high) THEN LGG	2	0.89945	13	0.000150328338081426
IF CHYLOMICRON(high) AND PROTEIN_DNA_COMPLEX(medium) THEN LGG	2	0.88453	13	0.000150328338081426
IF GLYCOSYLPHOSPHATIDYLINOSITOL_N_ACETYLGLUCOSAMINYLTRANSFERASE_GPI_GNT_COMPLEX(medium) AND KINESIN_COMPLEX(high) THEN LGG	2	0.8834	13	0.000150328338081426
IF INTERMEDIATE_DENSITY_LIPOPROTEIN_PARTICLE(high) AND LAMELLAR_BODY(medium) THEN LGG	2	0.87164	13	0.000150328338081426
IF PYRUVATE_DEHYDROGENASE_COMPLEX(high) AND MITOCHONDRIAL_ALPHA_KETOGLUTARATE_DEHYDROGENASE_COMPLEX(low) THEN GBM	2	0.83215	18	0.000163296477533961
IF LYSOSOMAL_LUMEN(medium) AND HEMIDESMOSOME(low) THEN GBM	2	0.83192	18	0.000163296477533961
IF VACUOLE(low) AND PROTEIN_DNA_COMPLEX(low) THEN LGG	2	0.81493	18	0.000163296477533961
IF PYRUVATE_DEHYDROGENASE_COMPLEX(medium) AND LYSOSOMAL_LUMEN(high) THEN GBM	2	0.81988	18	0.000163296477533961
IF KINESIN_COMPLEX(medium) AND RESPIRATORY_CHAIN_COMPLEX_II(high) THEN GBM	2	0.83029	18	0.000163296477533961
IF KINESIN_COMPLEX(high) AND TRIGLYCERIDE_RICH_PLASMA_LIPOPROTEIN_PARTICLE(medium) THEN LGG	2	0.82213	18	0.000163296477533961
IF MICROTUBULE_ORGANIZING_CENTER(high) AND MITOCHONDRIAL_ALPHA_KETOGLUTARATE_DEHYDROGENASE_COMPLEX(high) THEN LGG	2	0.85277	18	0.000163296477533961
IF CHYLOMICRON(medium) AND VACUOLE(high) THEN GBM	2	0.81304	18	0.000163296477533961
IF LYSOSOMAL_LUMEN(medium) AND RESPIRATORY_CHAIN_COMPLEX_II(high) THEN GBM	2	0.82476	18	0.000163296477533961
IF VACUOLE(high) AND PROTEIN_DNA_COMPLEX(medium) THEN GBM	2	0.82836	18	0.000163296477533961
IF LYSOSOMAL_LUMEN(low) AND HEMIDESMOSOME(medium) THEN LGG	2	0.82812	18	0.000163296477533961
IF MICROTUBULE_ORGANIZING_CENTER(high) AND LAMELLAR_BODY(high) THEN LGG	2	0.84424	18	0.000163296477533961
IF KINESIN_COMPLEX(medium) AND MICROTUBULE_MINUS_END(low) THEN GBM	2	0.79167	18	0.000163296477533961
IF LOW_DENSITY_LIPOPROTEIN_PARTICLE(low) AND ANAPHASE_PROMOTING_COMPLEX(medium) THEN GBM	2	0.87683	16	0.000219292900634497
IF LOW_DENSITY_LIPOPROTEIN_PARTICLE(medium) AND LAMELLAR_BODY(medium) THEN GBM	2	0.85359	16	0.000219292900634497
IF HEMIDESMOSOME(medium) AND MICROTUBULE_ORGANIZING_CENTER(high) THEN LGG	2	0.82523	16	0.000219292900634497
IF RESPIRATORY_CHAIN_COMPLEX_II(high) AND VACUOLE(medium) THEN GBM	2	0.79721	19	0.000219292900634497
IF INTERMEDIATE_DENSITY_LIPOPROTEIN_PARTICLE(high) AND MICROTUBULE_MINUS_END(medium) THEN LGG	2	0.84059	16	0.000219292900634497
IF VACUOLE(low) AND HEMIDESMOSOME(medium) THEN LGG	2	0.80507	16	0.000219292900634497
IF INTERMEDIATE_DENSITY_LIPOPROTEIN_PARTICLE(medium) AND ANAPHASE_PROMOTING_COMPLEX(medium) THEN GBM	2	0.85404	16	0.000219292900634497
IF PYRUVATE_DEHYDROGENASE_COMPLEX(medium) AND MICROTUBULE_MINUS_END(low) THEN GBM	2	0.854	16	0.000219292900634497
IF CHYLOMICRON(high) AND VACUOLE(medium) THEN LGG	2	0.86568	16	0.000219292900634497
IF LOW_DENSITY_LIPOPROTEIN_PARTICLE(high) AND MICROTUBULE_ORGANIZING_CENTER(medium) THEN LGG	2	0.8421	16	0.000219292900634497
IF RNA_POLYMERASE_II_CORE_COMPLEX(high) AND KINESIN_COMPLEX(medium) THEN GBM	2	0.83155	16	0.000219292900634497
IF PROTEIN_DNA_COMPLEX(high) AND LAMELLAR_BODY(medium) THEN GBM	2	0.82832	16	0.000219292900634497
IF CHYLOMICRON(high) AND GLYCOSYLPHOSPHATIDYLINOSITOL_N_ACETYLGLUCOSAMINYLTRANSFERASE_GPI_GNT_COMPLEX(high) THEN LGG	2	0.86643	16	0.000219292900634497
IF ANAPHASE_PROMOTING_COMPLEX(medium) AND LAMELLAR_BODY(medium) THEN GBM	2	0.84097	16	0.000219292900634497
IF GLYCOSYLPHOSPHATIDYLINOSITOL_N_ACETYLGLUCOSAMINYLTRANSFERASE_GPI_GNT_COMPLEX(high) AND PROTEIN_DNA_COMPLEX(medium) THEN GBM	2	0.80042	16	0.000219292900634497
IF VACUOLE(low) AND PROTEIN_DNA_COMPLEX(medium) THEN LGG	2	0.8299	16	0.000219292900634497
IF GLYCOSYLPHOSPHATIDYLINOSITOL_N_ACETYLGLUCOSAMINYLTRANSFERASE_GPI_GNT_COMPLEX(high) AND HEMIDESMOSOME(low) THEN GBM	2	0.74194	23	0.000219292900634497
IF MITOCHONDRIAL_ALPHA_KETOGLUTARATE_DEHYDROGENASE_COMPLEX(medium) AND LAMELLAR_BODY(high) THEN LGG	2	0.82773	16	0.000219292900634497
IF ANAPHASE_PROMOTING_COMPLEX(low) AND MICROTUBULE_MINUS_END(high) THEN LGG	2	0.8421	16	0.000219292900634497
IF RNA_POLYMERASE_II_CORE_COMPLEX(low) AND MICROTUBULE_ORGANIZING_CENTER(medium) THEN LGG	2	0.79167	19	0.000219292900634497
IF SPHERICAL_HIGH_DENSITY_LIPOPROTEIN_PARTICLE(low) AND TRIGLYCERIDE_RICH_PLASMA_LIPOPROTEIN_PARTICLE(medium) THEN GBM	2	0.83419	14	0.000283320285715652
IF INTERMEDIATE_DENSITY_LIPOPROTEIN_PARTICLE(high) AND PROTEIN_DNA_COMPLEX(medium) THEN LGG	2	0.88283	14	0.000283320285715652
IF MICROTUBULE_ORGANIZING_CENTER(low) AND LAMELLAR_BODY(high) THEN LGG	2	0.84926	14	0.000283320285715652
IF CHYLOMICRON(high) AND TRIGLYCERIDE_RICH_PLASMA_LIPOPROTEIN_PARTICLE(medium) THEN LGG	2	0.84625	14	0.000283320285715652
IF INTERMEDIATE_DENSITY_LIPOPROTEIN_PARTICLE(high) AND GLYCOSYLPHOSPHATIDYLINOSITOL_N_ACETYLGLUCOSAMINYLTRANSFERASE_GPI_GNT_COMPLEX(medium) THEN LGG	2	0.89444	14	0.000283320285715652
IF KINESIN_COMPLEX(low) AND ANAPHASE_PROMOTING_COMPLEX(high) THEN GBM	2	0.89035	12	0.000316566478295805
IF MICROTUBULE_MINUS_END(high) AND LAMELLAR_BODY(medium) THEN LGG	2	0.86507	12	0.000316566478295805
IF RESPIRATORY_CHAIN_COMPLEX_II(medium) AND MICROTUBULE_MINUS_END(high) THEN LGG	2	0.82439	17	0.000318767726406474
IF TRIGLYCERIDE_RICH_PLASMA_LIPOPROTEIN_PARTICLE(low) AND PROTEIN_DNA_COMPLEX(high) THEN GBM	2	0.80952	17	0.000318767726406474
IF GLYCOSYLPHOSPHATIDYLINOSITOL_N_ACETYLGLUCOSAMINYLTRANSFERASE_GPI_GNT_COMPLEX(medium) AND MITOCHONDRIAL_ALPHA_KETOGLUTARATE_DEHYDROGENASE_COMPLEX(medium) THEN GBM	2	0.80952	17	0.000318767726406474
IF PYRUVATE_DEHYDROGENASE_COMPLEX(low) AND MICROTUBULE_MINUS_END(medium) THEN LGG	2	0.80952	17	0.000318767726406474
IF GLYCOSYLPHOSPHATIDYLINOSITOL_N_ACETYLGLUCOSAMINYLTRANSFERASE_GPI_GNT_COMPLEX(medium) AND KINESIN_COMPLEX(low) THEN GBM	2	0.80952	17	0.000318767726406474
IF GLYCOSYLPHOSPHATIDYLINOSITOL_N_ACETYLGLUCOSAMINYLTRANSFERASE_GPI_GNT_COMPLEX(medium) AND VACUOLE(high) THEN GBM	2	0.80952	17	0.000318767726406474
IF CHYLOMICRON(low) AND PROTEIN_DNA_COMPLEX(high) THEN GBM	2	0.78261	18	0.000428047641761933
IF RESPIRATORY_CHAIN_COMPLEX_II(high) AND LAMELLAR_BODY(low) THEN GBM	2	0.7916	18	0.000428047641761933
IF ANAPHASE_PROMOTING_COMPLEX(low) AND LAMELLAR_BODY(high) THEN LGG	2	0.78261	18	0.000428047641761933
IF GLYCOSYLPHOSPHATIDYLINOSITOL_N_ACETYLGLUCOSAMINYLTRANSFERASE_GPI_GNT_COMPLEX(medium) AND MICROTUBULE_ORGANIZING_CENTER(medium) THEN GBM	2	0.7746	18	0.000428047641761933
IF KINESIN_COMPLEX(low) AND PROTEIN_DNA_COMPLEX(high) THEN GBM	2	0.7822	18	0.000428047641761933
IF INTERMEDIATE_DENSITY_LIPOPROTEIN_PARTICLE(medium) AND KINESIN_COMPLEX(low) THEN GBM	2	0.78261	18	0.000428047641761933
IF RESPIRATORY_CHAIN_COMPLEX_II(medium) AND PROTEIN_DNA_COMPLEX(low) THEN LGG	2	0.78261	18	0.000428047641761933
IF RESPIRATORY_CHAIN_COMPLEX_II(high) AND MICROTUBULE_ORGANIZING_CENTER(medium) THEN GBM	2	0.84784	15	0.000443631401973044
IF CHYLOMICRON(high) AND PROTEIN_DNA_COMPLEX(high) THEN LGG	2	0.84012	15	0.000443631401973044
IF RNA_POLYMERASE_II_CORE_COMPLEX(medium) AND LYSOSOMAL_LUMEN(low) THEN LGG	2	0.87497	15	0.000443631401973044
IF INTERMEDIATE_DENSITY_LIPOPROTEIN_PARTICLE(high) AND CHYLOMICRON(medium) THEN LGG	2	0.82195	15	0.000443631401973044
IF INTERMEDIATE_DENSITY_LIPOPROTEIN_PARTICLE(high) AND SPHERICAL_HIGH_DENSITY_LIPOPROTEIN_PARTICLE(medium) THEN LGG	2	0.85137	15	0.000443631401973044
IF GLYCOSYLPHOSPHATIDYLINOSITOL_N_ACETYLGLUCOSAMINYLTRANSFERASE_GPI_GNT_COMPLEX(medium) AND MICROTUBULE_ORGANIZING_CENTER(high) THEN LGG	2	0.8114	15	0.000443631401973044
IF VACUOLE(low) AND LAMELLAR_BODY(medium) THEN LGG	2	0.80785	15	0.000443631401973044
IF KINESIN_COMPLEX(high) AND LAMELLAR_BODY(low) THEN LGG	2	0.83333	15	0.000443631401973044
IF CHYLOMICRON(medium) AND KINESIN_COMPLEX(high) THEN LGG	2	0.86819	15	0.000443631401973044
IF PYRUVATE_DEHYDROGENASE_COMPLEX(medium) AND MICROTUBULE_MINUS_END(high) THEN LGG	2	0.76	19	0.000532035416455848
IF INTERMEDIATE_DENSITY_LIPOPROTEIN_PARTICLE(low) AND CHYLOMICRON(medium) THEN GBM	2	0.8564	13	0.000588546491654809
IF INTERMEDIATE_DENSITY_LIPOPROTEIN_PARTICLE(low) AND TRIGLYCERIDE_RICH_PLASMA_LIPOPROTEIN_PARTICLE(medium) THEN GBM	2	0.89982	13	0.000588546491654809
IF INTERMEDIATE_DENSITY_LIPOPROTEIN_PARTICLE(low) AND MITOCHONDRIAL_ALPHA_KETOGLUTARATE_DEHYDROGENASE_COMPLEX(high) THEN GBM	2	0.8604	13	0.000588546491654809
IF TRIGLYCERIDE_RICH_PLASMA_LIPOPROTEIN_PARTICLE(high) AND PROTEIN_DNA_COMPLEX(high) THEN LGG	2	0.87292	13	0.000588546491654809
IF CHYLOMICRON(high) AND RESPIRATORY_CHAIN_COMPLEX_II(high) THEN LGG	2	0.86667	13	0.000588546491654809
IF KINESIN_COMPLEX(low) AND PROTEIN_DNA_COMPLEX(medium) THEN GBM	2	0.80411	16	0.000609800244557995
IF PYRUVATE_DEHYDROGENASE_COMPLEX(high) AND ANAPHASE_PROMOTING_COMPLEX(high) THEN GBM	2	0.8326	16	0.000609800244557995
IF TRIGLYCERIDE_RICH_PLASMA_LIPOPROTEIN_PARTICLE(medium) AND MITOCHONDRIAL_ALPHA_KETOGLUTARATE_DEHYDROGENASE_COMPLEX(low) THEN GBM	2	0.78704	16	0.000609800244557995
IF RNA_POLYMERASE_II_CORE_COMPLEX(high) AND LOW_DENSITY_LIPOPROTEIN_PARTICLE(medium) THEN GBM	2	0.8356	16	0.000609800244557995
IF RESPIRATORY_CHAIN_COMPLEX_II(low) AND MITOCHONDRIAL_ALPHA_KETOGLUTARATE_DEHYDROGENASE_COMPLEX(low) THEN GBM	2	0.76311	16	0.000609800244557995
IF MICROTUBULE_ORGANIZING_CENTER(low) AND LAMELLAR_BODY(low) THEN GBM	2	0.75478	16	0.000609800244557995
IF RESPIRATORY_CHAIN_COMPLEX_II(medium) AND MICROTUBULE_ORGANIZING_CENTER(high) THEN LGG	2	0.80229	16	0.000609800244557995
IF ANAPHASE_PROMOTING_COMPLEX(medium) AND MICROTUBULE_ORGANIZING_CENTER(low) THEN GBM	2	0.80438	16	0.000609800244557995
IF PYRUVATE_DEHYDROGENASE_COMPLEX(medium) AND RESPIRATORY_CHAIN_COMPLEX_II(high) THEN GBM	2	0.79938	16	0.000609800244557995
IF TRIGLYCERIDE_RICH_PLASMA_LIPOPROTEIN_PARTICLE(medium) AND LYSOSOMAL_LUMEN(low) THEN LGG	2	0.825	16	0.000609800244557995
IF RNA_POLYMERASE_II_CORE_COMPLEX(high) AND PROTEIN_DNA_COMPLEX(medium) THEN GBM	2	0.80386	16	0.000609800244557995
IF VACUOLE(high) AND MICROTUBULE_ORGANIZING_CENTER(medium) THEN GBM	2	0.80837	16	0.000609800244557995
IF LYSOSOMAL_LUMEN(low) AND ANAPHASE_PROMOTING_COMPLEX(high) THEN LGG	2	0.82105	16	0.000609800244557995
IF GLYCOSYLPHOSPHATIDYLINOSITOL_N_ACETYLGLUCOSAMINYLTRANSFERASE_GPI_GNT_COMPLEX(medium) AND TRIGLYCERIDE_RICH_PLASMA_LIPOPROTEIN_PARTICLE(low) THEN GBM	2	0.80595	16	0.000609800244557995
IF ANAPHASE_PROMOTING_COMPLEX(medium) AND VACUOLE(high) THEN GBM	2	0.78697	16	0.000609800244557995
IF SPHERICAL_HIGH_DENSITY_LIPOPROTEIN_PARTICLE(medium) AND MICROTUBULE_ORGANIZING_CENTER(high) THEN LGG	2	0.8	16	0.000609800244557995
IF INTERMEDIATE_DENSITY_LIPOPROTEIN_PARTICLE(high) AND PYRUVATE_DEHYDROGENASE_COMPLEX(high) THEN LGG	2	0.87234	11	0.000659565076408501
IF ANAPHASE_PROMOTING_COMPLEX(high) AND MITOCHONDRIAL_ALPHA_KETOGLUTARATE_DEHYDROGENASE_COMPLEX(low) THEN GBM	2	0.75631	17	0.000792371190139203
IF SPHERICAL_HIGH_DENSITY_LIPOPROTEIN_PARTICLE(medium) AND LYSOSOMAL_LUMEN(low) THEN LGG	2	0.7773	17	0.000792371190139203
IF LYSOSOMAL_LUMEN(medium) AND MICROTUBULE_ORGANIZING_CENTER(medium) THEN GBM	2	0.76196	17	0.000792371190139203
IF MITOCHONDRIAL_ALPHA_KETOGLUTARATE_DEHYDROGENASE_COMPLEX(low) AND LAMELLAR_BODY(medium) THEN GBM	2	0.78412	17	0.000792371190139203
IF RESPIRATORY_CHAIN_COMPLEX_II(high) AND ANAPHASE_PROMOTING_COMPLEX(medium) THEN GBM	2	0.74532	17	0.000792371190139203
IF LYSOSOMAL_LUMEN(medium) AND PROTEIN_DNA_COMPLEX(high) THEN GBM	2	0.74648	17	0.000792371190139203
IF VACUOLE(medium) AND HEMIDESMOSOME(low) THEN GBM	2	0.77273	17	0.000792371190139203
IF PYRUVATE_DEHYDROGENASE_COMPLEX(high) AND HEMIDESMOSOME(low) THEN GBM	2	0.77273	17	0.000792371190139203
IF KINESIN_COMPLEX(medium) AND HEMIDESMOSOME(low) THEN GBM	2	0.87767	14	0.000851833106898042
IF CHYLOMICRON(high) AND LYSOSOMAL_LUMEN(medium) THEN LGG	2	0.83537	14	0.000851833106898042
IF CHYLOMICRON(medium) AND SPHERICAL_HIGH_DENSITY_LIPOPROTEIN_PARTICLE(low) THEN GBM	2	0.8442	14	0.000851833106898042
IF CHYLOMICRON(high) AND VACUOLE(high) THEN LGG	2	0.86541	14	0.000851833106898042
IF GLYCOSYLPHOSPHATIDYLINOSITOL_N_ACETYLGLUCOSAMINYLTRANSFERASE_GPI_GNT_COMPLEX(high) AND LOW_DENSITY_LIPOPROTEIN_PARTICLE(high) THEN LGG	2	0.84755	14	0.000851833106898042
IF LOW_DENSITY_LIPOPROTEIN_PARTICLE(high) AND LAMELLAR_BODY(medium) THEN LGG	2	0.85365	14	0.000851833106898042
IF LOW_DENSITY_LIPOPROTEIN_PARTICLE(medium) AND MITOCHONDRIAL_ALPHA_KETOGLUTARATE_DEHYDROGENASE_COMPLEX(low) THEN GBM	2	0.80948	14	0.000851833106898042
IF RNA_POLYMERASE_II_CORE_COMPLEX(medium) AND LOW_DENSITY_LIPOPROTEIN_PARTICLE(high) THEN LGG	2	0.83263	14	0.000851833106898042
IF TRIGLYCERIDE_RICH_PLASMA_LIPOPROTEIN_PARTICLE(high) AND PROTEIN_DNA_COMPLEX(medium) THEN LGG	2	0.82804	14	0.000851833106898042
IF SPHERICAL_HIGH_DENSITY_LIPOPROTEIN_PARTICLE(medium) AND LOW_DENSITY_LIPOPROTEIN_PARTICLE(high) THEN LGG	2	0.84227	14	0.000851833106898042
IF RNA_POLYMERASE_II_CORE_COMPLEX(medium) AND PYRUVATE_DEHYDROGENASE_COMPLEX(low) THEN LGG	2	0.82353	14	0.000851833106898042
IF GLYCOSYLPHOSPHATIDYLINOSITOL_N_ACETYLGLUCOSAMINYLTRANSFERASE_GPI_GNT_COMPLEX(low) AND LAMELLAR_BODY(medium) THEN LGG	2	0.85294	14	0.000851833106898042
IF SPHERICAL_HIGH_DENSITY_LIPOPROTEIN_PARTICLE(high) AND RESPIRATORY_CHAIN_COMPLEX_II(medium) THEN LGG	2	0.86898	14	0.000851833106898042
IF RNA_POLYMERASE_II_CORE_COMPLEX(medium) AND GLYCOSYLPHOSPHATIDYLINOSITOL_N_ACETYLGLUCOSAMINYLTRANSFERASE_GPI_GNT_COMPLEX(low) THEN LGG	2	0.8287	14	0.000851833106898042
IF INTERMEDIATE_DENSITY_LIPOPROTEIN_PARTICLE(medium) AND VACUOLE(low) THEN LGG	2	0.80392	14	0.000851833106898042
IF KINESIN_COMPLEX(high) AND LYSOSOMAL_LUMEN(high) THEN LGG	2	0.85328	12	0.00115713064857418
IF CHYLOMICRON(high) AND LAMELLAR_BODY(medium) THEN LGG	2	0.8789	12	0.00115713064857418
IF TRIGLYCERIDE_RICH_PLASMA_LIPOPROTEIN_PARTICLE(low) AND MITOCHONDRIAL_ALPHA_KETOGLUTARATE_DEHYDROGENASE_COMPLEX(high) THEN GBM	2	0.80998	12	0.00115713064857418
IF ANAPHASE_PROMOTING_COMPLEX(high) AND MICROTUBULE_ORGANIZING_CENTER(low) THEN GBM	2	0.84796	12	0.00115713064857418
IF RNA_POLYMERASE_II_CORE_COMPLEX(low) AND SPHERICAL_HIGH_DENSITY_LIPOPROTEIN_PARTICLE(low) THEN GBM	2	0.81956	12	0.00115713064857418
IF SPHERICAL_HIGH_DENSITY_LIPOPROTEIN_PARTICLE(high) AND PYRUVATE_DEHYDROGENASE_COMPLEX(high) THEN LGG	2	0.80729	12	0.00115713064857418
IF SPHERICAL_HIGH_DENSITY_LIPOPROTEIN_PARTICLE(high) AND MICROTUBULE_MINUS_END(low) THEN LGG	2	0.83501	12	0.00115713064857418
IF INTERMEDIATE_DENSITY_LIPOPROTEIN_PARTICLE(high) AND KINESIN_COMPLEX(low) THEN LGG	2	0.87363	12	0.00115713064857418
IF CHYLOMICRON(high) AND LOW_DENSITY_LIPOPROTEIN_PARTICLE(medium) THEN LGG	2	0.84592	12	0.00115713064857418
IF PYRUVATE_DEHYDROGENASE_COMPLEX(high) AND MICROTUBULE_MINUS_END(medium) THEN GBM	2	0.82353	15	0.0011636659915343
IF HEMIDESMOSOME(medium) AND MITOCHONDRIAL_ALPHA_KETOGLUTARATE_DEHYDROGENASE_COMPLEX(low) THEN GBM	2	0.78947	15	0.0011636659915343
IF LYSOSOMAL_LUMEN(medium) AND ANAPHASE_PROMOTING_COMPLEX(high) THEN GBM	2	0.78947	15	0.0011636659915343
IF KINESIN_COMPLEX(low) AND RESPIRATORY_CHAIN_COMPLEX_II(low) THEN GBM	2	0.90684	10	0.00140246700191222
IF GLYCOSYLPHOSPHATIDYLINOSITOL_N_ACETYLGLUCOSAMINYLTRANSFERASE_GPI_GNT_COMPLEX(medium) AND LOW_DENSITY_LIPOPROTEIN_PARTICLE(medium) AND MITOCHONDRIAL_ALPHA_KETOGLUTARATE_DEHYDROGENASE_COMPLEX(medium) THEN GBM	3	0.90909	10	0.00140246700191222
IF LOW_DENSITY_LIPOPROTEIN_PARTICLE(medium) AND ANAPHASE_PROMOTING_COMPLEX(high) THEN GBM	2	0.76191	16	0.00148688151455119
IF RESPIRATORY_CHAIN_COMPLEX_II(high) AND PROTEIN_DNA_COMPLEX(high) THEN GBM	2	0.76191	16	0.00148688151455119
IF INTERMEDIATE_DENSITY_LIPOPROTEIN_PARTICLE(high) AND VACUOLE(high) THEN LGG	2	0.83856	13	0.00170052751895658
IF CHYLOMICRON(high) AND PYRUVATE_DEHYDROGENASE_COMPLEX(high) THEN LGG	2	0.82902	13	0.00170052751895658
IF PYRUVATE_DEHYDROGENASE_COMPLEX(low) AND ANAPHASE_PROMOTING_COMPLEX(high) THEN LGG	2	0.8125	13	0.00170052751895658
IF INTERMEDIATE_DENSITY_LIPOPROTEIN_PARTICLE(medium) AND MICROTUBULE_MINUS_END(low) THEN GBM	2	0.81746	13	0.00170052751895658
IF SPHERICAL_HIGH_DENSITY_LIPOPROTEIN_PARTICLE(low) AND MITOCHONDRIAL_ALPHA_KETOGLUTARATE_DEHYDROGENASE_COMPLEX(high) THEN GBM	2	0.83106	13	0.00170052751895658
IF VACUOLE(high) AND LAMELLAR_BODY(low) THEN GBM	2	0.80986	13	0.00170052751895658
IF GLYCOSYLPHOSPHATIDYLINOSITOL_N_ACETYLGLUCOSAMINYLTRANSFERASE_GPI_GNT_COMPLEX(high) AND ANAPHASE_PROMOTING_COMPLEX(medium) THEN GBM	2	0.80725	13	0.00170052751895658
IF INTERMEDIATE_DENSITY_LIPOPROTEIN_PARTICLE(medium) AND LYSOSOMAL_LUMEN(low) THEN LGG	2	0.78819	13	0.00170052751895658
IF RNA_POLYMERASE_II_CORE_COMPLEX(low) AND LAMELLAR_BODY(medium) THEN LGG	2	0.8125	13	0.00170052751895658
IF CHYLOMICRON(low) AND HEMIDESMOSOME(medium) THEN GBM	2	0.8125	13	0.00170052751895658
IF LOW_DENSITY_LIPOPROTEIN_PARTICLE(low) AND VACUOLE(low) THEN LGG	2	0.8125	13	0.00170052751895658
IF LOW_DENSITY_LIPOPROTEIN_PARTICLE(medium) AND RESPIRATORY_CHAIN_COMPLEX_II(high) THEN GBM	2	0.73902	17	0.00175561975212303
IF LYSOSOMAL_LUMEN(medium) AND LAMELLAR_BODY(low) THEN GBM	2	0.72	18	0.00203467350243357
IF RNA_POLYMERASE_II_CORE_COMPLEX(medium) AND TRIGLYCERIDE_RICH_PLASMA_LIPOPROTEIN_PARTICLE(low) THEN GBM	2	0.83007	14	0.00222616857101939
IF RNA_POLYMERASE_II_CORE_COMPLEX(high) AND CHYLOMICRON(medium) THEN GBM	2	0.77415	14	0.00222616857101939
IF RNA_POLYMERASE_II_CORE_COMPLEX(medium) AND ANAPHASE_PROMOTING_COMPLEX(low) THEN LGG	2	0.74045	14	0.00222616857101939
IF TRIGLYCERIDE_RICH_PLASMA_LIPOPROTEIN_PARTICLE(medium) AND MICROTUBULE_ORGANIZING_CENTER(low) THEN GBM	2	0.72794	14	0.00222616857101939
IF TRIGLYCERIDE_RICH_PLASMA_LIPOPROTEIN_PARTICLE(low) AND HEMIDESMOSOME(medium) THEN GBM	2	0.77778	14	0.00222616857101939
IF PYRUVATE_DEHYDROGENASE_COMPLEX(low) AND RESPIRATORY_CHAIN_COMPLEX_II(medium) THEN LGG	2	0.79222	14	0.00222616857101939
IF GLYCOSYLPHOSPHATIDYLINOSITOL_N_ACETYLGLUCOSAMINYLTRANSFERASE_GPI_GNT_COMPLEX(high) AND PYRUVATE_DEHYDROGENASE_COMPLEX(medium) THEN GBM	2	0.72353	14	0.00222616857101939
IF INTERMEDIATE_DENSITY_LIPOPROTEIN_PARTICLE(medium) AND MICROTUBULE_ORGANIZING_CENTER(medium) THEN GBM	2	0.78363	14	0.00222616857101939
IF RNA_POLYMERASE_II_CORE_COMPLEX(medium) AND TRIGLYCERIDE_RICH_PLASMA_LIPOPROTEIN_PARTICLE(high) THEN LGG	2	0.81218	14	0.00222616857101939
IF MICROTUBULE_MINUS_END(low) AND MITOCHONDRIAL_ALPHA_KETOGLUTARATE_DEHYDROGENASE_COMPLEX(medium) THEN GBM	2	0.77373	14	0.00222616857101939
IF CHYLOMICRON(medium) AND LOW_DENSITY_LIPOPROTEIN_PARTICLE(low) THEN GBM	2	0.7869	14	0.00222616857101939
IF RESPIRATORY_CHAIN_COMPLEX_II(high) AND HEMIDESMOSOME(medium) THEN GBM	2	0.77778	14	0.00222616857101939
IF SPHERICAL_HIGH_DENSITY_LIPOPROTEIN_PARTICLE(medium) AND PROTEIN_DNA_COMPLEX(low) THEN LGG	2	0.72953	14	0.00222616857101939
IF PYRUVATE_DEHYDROGENASE_COMPLEX(medium) AND MICROTUBULE_ORGANIZING_CENTER(medium) THEN GBM	2	0.729	15	0.00273425100346904
IF TRIGLYCERIDE_RICH_PLASMA_LIPOPROTEIN_PARTICLE(high) AND RESPIRATORY_CHAIN_COMPLEX_II(medium) THEN LGG	2	0.75	15	0.00273425100346904
IF LOW_DENSITY_LIPOPROTEIN_PARTICLE(medium) AND HEMIDESMOSOME(low) THEN GBM	2	0.75333	15	0.00273425100346904
IF KINESIN_COMPLEX(low) AND PYRUVATE_DEHYDROGENASE_COMPLEX(medium) THEN GBM	2	0.78578	15	0.00273425100346904
IF GLYCOSYLPHOSPHATIDYLINOSITOL_N_ACETYLGLUCOSAMINYLTRANSFERASE_GPI_GNT_COMPLEX(high) AND LOW_DENSITY_LIPOPROTEIN_PARTICLE(medium) THEN GBM	2	0.75	15	0.00273425100346904
IF HEMIDESMOSOME(low) AND MICROTUBULE_ORGANIZING_CENTER(medium) THEN GBM	2	0.76697	15	0.00273425100346904
IF RESPIRATORY_CHAIN_COMPLEX_II(medium) AND ANAPHASE_PROMOTING_COMPLEX(low) THEN LGG	2	0.72045	15	0.00273425100346904
IF LOW_DENSITY_LIPOPROTEIN_PARTICLE(low) AND LAMELLAR_BODY(low) THEN GBM	2	0.75	15	0.00273425100346904
IF LYSOSOMAL_LUMEN(high) AND ANAPHASE_PROMOTING_COMPLEX(low) AND MICROTUBULE_MINUS_END(medium) THEN LGG	3	1	7	0.00288547258376145
IF KINESIN_COMPLEX(high) AND VACUOLE(high) THEN LGG	2	0.91469	9	0.00295245722095292
IF KINESIN_COMPLEX(high) AND ANAPHASE_PROMOTING_COMPLEX(low) THEN LGG	2	0.86121	9	0.00295245722095292
IF MITOCHONDRIAL_ALPHA_KETOGLUTARATE_DEHYDROGENASE_COMPLEX(low) AND LAMELLAR_BODY(low) THEN GBM	2	0.73292	16	0.00319160671557805
IF RNA_POLYMERASE_II_CORE_COMPLEX(medium) AND RESPIRATORY_CHAIN_COMPLEX_II(medium) THEN LGG	2	0.72727	16	0.00319160671557805
IF PYRUVATE_DEHYDROGENASE_COMPLEX(high) AND PROTEIN_DNA_COMPLEX(medium) THEN GBM	2	0.72727	16	0.00319160671557805
IF LYSOSOMAL_LUMEN(high) AND MICROTUBULE_ORGANIZING_CENTER(high) THEN LGG	2	0.81979	12	0.00325457512052596
IF RESPIRATORY_CHAIN_COMPLEX_II(low) AND LAMELLAR_BODY(medium) THEN LGG	2	0.8	12	0.00325457512052596
IF RNA_POLYMERASE_II_CORE_COMPLEX(high) AND CHYLOMICRON(high) THEN LGG	2	0.79643	12	0.00325457512052596
IF INTERMEDIATE_DENSITY_LIPOPROTEIN_PARTICLE(high) AND MICROTUBULE_MINUS_END(low) THEN LGG	2	0.80731	12	0.00325457512052596
IF INTERMEDIATE_DENSITY_LIPOPROTEIN_PARTICLE(medium) AND SPHERICAL_HIGH_DENSITY_LIPOPROTEIN_PARTICLE(low) THEN GBM	2	0.8	12	0.00325457512052596
IF TRIGLYCERIDE_RICH_PLASMA_LIPOPROTEIN_PARTICLE(low) AND HEMIDESMOSOME(high) THEN GBM	2	0.83383	12	0.00325457512052596
IF PROTEIN_DNA_COMPLEX(low) AND MICROTUBULE_ORGANIZING_CENTER(medium) THEN LGG	2	0.8	12	0.00325457512052596
IF SPHERICAL_HIGH_DENSITY_LIPOPROTEIN_PARTICLE(high) AND LAMELLAR_BODY(medium) THEN LGG	2	0.82222	12	0.00325457512052596
IF SPHERICAL_HIGH_DENSITY_LIPOPROTEIN_PARTICLE(high) AND VACUOLE(high) THEN LGG	2	0.82698	12	0.00325457512052596
IF INTERMEDIATE_DENSITY_LIPOPROTEIN_PARTICLE(low) AND PYRUVATE_DEHYDROGENASE_COMPLEX(low) THEN GBM	2	0.8	12	0.00325457512052596
IF SPHERICAL_HIGH_DENSITY_LIPOPROTEIN_PARTICLE(high) AND MICROTUBULE_ORGANIZING_CENTER(medium) THEN LGG	2	0.81622	12	0.00325457512052596
IF RNA_POLYMERASE_II_CORE_COMPLEX(high) AND ANAPHASE_PROMOTING_COMPLEX(medium) THEN GBM	2	0.80401	13	0.00421302937438631
IF PYRUVATE_DEHYDROGENASE_COMPLEX(high) AND VACUOLE(low) THEN LGG	2	0.76471	13	0.00421302937438631
IF PYRUVATE_DEHYDROGENASE_COMPLEX(medium) AND LYSOSOMAL_LUMEN(low) THEN LGG	2	0.77475	13	0.00421302937438631
IF CHYLOMICRON(low) AND TRIGLYCERIDE_RICH_PLASMA_LIPOPROTEIN_PARTICLE(medium) THEN GBM	2	0.75962	10	0.00475135925417684
IF GLYCOSYLPHOSPHATIDYLINOSITOL_N_ACETYLGLUCOSAMINYLTRANSFERASE_GPI_GNT_COMPLEX(low) AND VACUOLE(high) THEN LGG	2	0.82576	10	0.00475135925417684
IF PYRUVATE_DEHYDROGENASE_COMPLEX(medium) AND PROTEIN_DNA_COMPLEX(medium) THEN GBM	2	0.73684	14	0.00501627003886708
IF RNA_POLYMERASE_II_CORE_COMPLEX(medium) AND VACUOLE(low) THEN LGG	2	0.74703	14	0.00501627003886708
IF INTERMEDIATE_DENSITY_LIPOPROTEIN_PARTICLE(medium) AND PYRUVATE_DEHYDROGENASE_COMPLEX(high) THEN GBM	2	0.73684	14	0.00501627003886708
IF MICROTUBULE_ORGANIZING_CENTER(high) AND LAMELLAR_BODY(low) THEN LGG	2	0.73684	14	0.00501627003886708
IF RESPIRATORY_CHAIN_COMPLEX_II(high) AND PROTEIN_DNA_COMPLEX(medium) THEN GBM	2	0.7615	14	0.00501627003886708
IF MICROTUBULE_ORGANIZING_CENTER(medium) AND MITOCHONDRIAL_ALPHA_KETOGLUTARATE_DEHYDROGENASE_COMPLEX(low) THEN GBM	2	0.74282	14	0.00501627003886708
IF GLYCOSYLPHOSPHATIDYLINOSITOL_N_ACETYLGLUCOSAMINYLTRANSFERASE_GPI_GNT_COMPLEX(low) AND MICROTUBULE_ORGANIZING_CENTER(medium) THEN LGG	2	0.71429	15	0.00572787828623994
IF LOW_DENSITY_LIPOPROTEIN_PARTICLE(medium) AND PROTEIN_DNA_COMPLEX(high) THEN GBM	2	0.71326	15	0.00572787828623994
IF CHYLOMICRON(medium) AND MICROTUBULE_MINUS_END(low) THEN GBM	2	0.71429	15	0.00572787828623994
IF GLYCOSYLPHOSPHATIDYLINOSITOL_N_ACETYLGLUCOSAMINYLTRANSFERASE_GPI_GNT_COMPLEX(medium) AND LYSOSOMAL_LUMEN(medium) THEN GBM	2	0.71429	15	0.00572787828623994
IF RNA_POLYMERASE_II_CORE_COMPLEX(medium) AND RESPIRATORY_CHAIN_COMPLEX_II(medium) AND ANAPHASE_PROMOTING_COMPLEX(low) THEN LGG	3	0.88426	8	0.00628241608801009
IF RNA_POLYMERASE_II_CORE_COMPLEX(low) AND ANAPHASE_PROMOTING_COMPLEX(high) THEN LGG	2	0.7619	11	0.00631104068879846
IF INTERMEDIATE_DENSITY_LIPOPROTEIN_PARTICLE(low) AND MICROTUBULE_ORGANIZING_CENTER(high) THEN GBM	2	0.78051	11	0.00631104068879846
IF MICROTUBULE_MINUS_END(high) AND HEMIDESMOSOME(low) THEN LGG	2	0.79953	11	0.00631104068879846
IF CHYLOMICRON(high) AND MICROTUBULE_ORGANIZING_CENTER(low) THEN LGG	2	0.78571	11	0.00631104068879846
IF PYRUVATE_DEHYDROGENASE_COMPLEX(high) AND TRIGLYCERIDE_RICH_PLASMA_LIPOPROTEIN_PARTICLE(medium) THEN GBM	2	0.75588	11	0.00631104068879846
IF INTERMEDIATE_DENSITY_LIPOPROTEIN_PARTICLE(medium) AND TRIGLYCERIDE_RICH_PLASMA_LIPOPROTEIN_PARTICLE(low) THEN GBM	2	0.78692	11	0.00631104068879846
IF LYSOSOMAL_LUMEN(high) AND MICROTUBULE_MINUS_END(high) THEN LGG	2	0.77576	11	0.00631104068879846
IF INTERMEDIATE_DENSITY_LIPOPROTEIN_PARTICLE(low) AND RESPIRATORY_CHAIN_COMPLEX_II(low) THEN GBM	2	0.7751	11	0.00631104068879846
IF CHYLOMICRON(low) AND MICROTUBULE_MINUS_END(high) THEN LGG	2	0.76099	11	0.00631104068879846
IF LOW_DENSITY_LIPOPROTEIN_PARTICLE(high) AND LYSOSOMAL_LUMEN(medium) THEN LGG	2	0.82166	11	0.00631104068879846
IF GLYCOSYLPHOSPHATIDYLINOSITOL_N_ACETYLGLUCOSAMINYLTRANSFERASE_GPI_GNT_COMPLEX(high) AND LYSOSOMAL_LUMEN(low) THEN LGG	2	0.78571	11	0.00631104068879846
IF RNA_POLYMERASE_II_CORE_COMPLEX(high) AND LYSOSOMAL_LUMEN(medium) AND MITOCHONDRIAL_ALPHA_KETOGLUTARATE_DEHYDROGENASE_COMPLEX(low) THEN GBM	3	1	6	0.00652853558778683
IF INTERMEDIATE_DENSITY_LIPOPROTEIN_PARTICLE(high) AND LYSOSOMAL_LUMEN(medium) THEN LGG	2	0.77279	12	0.0077883054850306
IF RESPIRATORY_CHAIN_COMPLEX_II(medium) AND MICROTUBULE_MINUS_END(medium) THEN LGG	2	0.7	12	0.0077883054850306
IF SPHERICAL_HIGH_DENSITY_LIPOPROTEIN_PARTICLE(low) AND KINESIN_COMPLEX(high) THEN GBM	2	0.78958	12	0.0077883054850306
IF PROTEIN_DNA_COMPLEX(medium) AND MITOCHONDRIAL_ALPHA_KETOGLUTARATE_DEHYDROGENASE_COMPLEX(low) THEN GBM	2	0.69669	12	0.0077883054850306
IF PYRUVATE_DEHYDROGENASE_COMPLEX(high) AND LYSOSOMAL_LUMEN(high) THEN GBM	2	0.75	12	0.0077883054850306
IF LYSOSOMAL_LUMEN(low) AND MICROTUBULE_MINUS_END(low) THEN LGG	2	0.75	12	0.0077883054850306
IF ANAPHASE_PROMOTING_COMPLEX(high) AND MICROTUBULE_ORGANIZING_CENTER(medium) THEN GBM	2	0.7432	13	0.00898331259111651
IF CHYLOMICRON(medium) AND HEMIDESMOSOME(low) THEN GBM	2	0.72588	13	0.00898331259111651
IF GLYCOSYLPHOSPHATIDYLINOSITOL_N_ACETYLGLUCOSAMINYLTRANSFERASE_GPI_GNT_COMPLEX(low) AND MITOCHONDRIAL_ALPHA_KETOGLUTARATE_DEHYDROGENASE_COMPLEX(low) THEN GBM	2	0.72222	13	0.00898331259111651
IF INTERMEDIATE_DENSITY_LIPOPROTEIN_PARTICLE(medium) AND PROTEIN_DNA_COMPLEX(low) THEN LGG	2	0.74183	13	0.00898331259111651
IF PROTEIN_DNA_COMPLEX(medium) AND LAMELLAR_BODY(high) THEN LGG	2	0.72222	13	0.00898331259111651
IF GLYCOSYLPHOSPHATIDYLINOSITOL_N_ACETYLGLUCOSAMINYLTRANSFERASE_GPI_GNT_COMPLEX(medium) AND TRIGLYCERIDE_RICH_PLASMA_LIPOPROTEIN_PARTICLE(medium) THEN GBM	2	0.72222	13	0.00898331259111651
IF GLYCOSYLPHOSPHATIDYLINOSITOL_N_ACETYLGLUCOSAMINYLTRANSFERASE_GPI_GNT_COMPLEX(medium) AND PYRUVATE_DEHYDROGENASE_COMPLEX(high) THEN GBM	2	0.72222	13	0.00898331259111651
IF VACUOLE(medium) AND PROTEIN_DNA_COMPLEX(low) THEN LGG	2	0.72222	13	0.00898331259111651
IF INTERMEDIATE_DENSITY_LIPOPROTEIN_PARTICLE(low) AND RNA_POLYMERASE_II_CORE_COMPLEX(low) THEN GBM	2	0.77702	9	0.00927184482757052
IF RNA_POLYMERASE_II_CORE_COMPLEX(high) AND GLYCOSYLPHOSPHATIDYLINOSITOL_N_ACETYLGLUCOSAMINYLTRANSFERASE_GPI_GNT_COMPLEX(low) THEN GBM	2	0.76333	9	0.00927184482757052
IF RNA_POLYMERASE_II_CORE_COMPLEX(low) AND LOW_DENSITY_LIPOPROTEIN_PARTICLE(low) THEN GBM	2	0.77684	9	0.00927184482757052
IF PROTEIN_DNA_COMPLEX(medium) AND HEMIDESMOSOME(low) THEN GBM	2	0.69783	14	0.00994946755281094
IF RNA_POLYMERASE_II_CORE_COMPLEX(high) AND SPHERICAL_HIGH_DENSITY_LIPOPROTEIN_PARTICLE(medium) THEN GBM	2	0.7	14	0.00994946755281094
IF GLYCOSYLPHOSPHATIDYLINOSITOL_N_ACETYLGLUCOSAMINYLTRANSFERASE_GPI_GNT_COMPLEX(high) AND PYRUVATE_DEHYDROGENASE_COMPLEX(low) THEN LGG	2	0.7	14	0.00994946755281094
